# Supplementary material for: A 41-Gene Pair Signature for Predicting the Pathological Response of Locally Advanced Rectal Cancer to Neoadjuvant Chemoradiation
Source: Front Med (Lausanne). 2021 Sep 14;8:744295. doi: 10.3389/fmed.2021.744295 (PMC8476893; doi:10.3389/fmed.2021.744295)
Supplement: Supplementary file 5 [file Data_Sheet_5.XLSX]

## Sheet: gse20298_class
	title	geo_accession	status	submission_date	last_update_date	type	channel_count	source_name_ch1	organism_ch1	characteristics_ch1	characteristics_ch1.1	characteristics_ch1.2	characteristics_ch1.3	treatment_protocol_ch1	growth_protocol_ch1	molecule_ch1	extract_protocol_ch1	label_ch1	label_protocol_ch1	taxid_ch1	hyb_protocol	scan_protocol	description	data_processing	platform_id	contact_name	contact_email	contact_phone	contact_department	contact_institute	contact_address	contact_city	contact_zip/postal_code	contact_country	supplementary_file	data_row_count	cell line:ch1	medium:ch1	rep:ch1	sf2:ch1
GSM508827	caco2.mem.1	GSM508827	Public on Feb 10 2011	Feb 12 2010	Feb 10 2011	RNA	1	colorectal cancer cell line	Homo sapiens	cell line: Caco-2	medium: MEM	sf2: 0.583333333333333	rep: 1	No treatment prior to expression profiling analysis.	Twelve human colorectal cancer cell lines were obtained from the American Type Culture Collection (ATCC, Manassas, VA): Caco-2, HT-29, LS411N, LS513, LS1034, SW403, SW480, SW620, SW837, SW1116, SW1463, and WiDr. All lines were cultured in their recommended medium (Invitrogen, Karlsruhe, Germany), supplemented with fetal bovine serum (Pan, Aidenbach, Germany) and 2mM L-glutamine (BioWhittaker, Ver…	total RNA	Total RNA was isolated using the RNeasy Mini kit (Qiagen, Hilden, Germany) according to the manufacturer's instructions, including a DNase treatment step. Nucleic acid quantity, quality and purity were determined using NanoDrop ND-1000 spectrophotometer (Peqlab, Erlangen, Germany) and a 2100 Bioanalyzer (Agilent Technologies, Palo Alto, CA). Only RNA samples with a RNA integrity number > 9.5 were…	Cy3	800 ng of total RNA were reverse-transcribed, amplified and labeled with Cy3 using the Low RNA Input Linear Amplification Kit, PLUS (Agilent Technologies). After purification, the cRNA yield and integration of cyanine 3-CTP was measured using a spectrophotometer. cRNA with a specific activity > 9.0 pmol/碌g was excluded from further experiments.	9606	Subsequently, 1.65 碌g of labeled cRNA per sample was fragmentized and hybridized overnight to a 4x44k gene expression microarray (Agilent Technologies). After a washing step the arrays were scanned on an Agilent DNA microarray scanner G2505B (Agilent Technologies) at 5 micron resolution. Scanned image files were visually inspected for artifacts and subsequently analyzed.	Agilent DNA microarray scanner G2505B, 5 micron resolution	Cell line: Caco-2; Medium: MEM; SF2: 0.58	Median signal intensities from the Feature Extraction Software were converted to log2 and quantile normalized using the R package 鈥渓imma鈥?	GPL4133	Melanie,,Spitzner	melanie.spitzner@med.uni-goettingen.de	+49 (0) 551 - 39 10478	Department of General and Visceral Surgery	Georg-August-University Goettingen	Robert-Koch-Str. 40	Goettingen	37075	Germany	ftp://ftp.ncbi.nlm.nih.gov/geo/samples/GSM508nnn/GSM508827/suppl/GSM508827_Grade2_251485050467_S01_GE1-v5_95_Feb07_1_1.txt.gz	45015	Caco-2	MEM	1	0.583333
GSM508828	ht29.mccoy.3	GSM508828	Public on Feb 10 2011	Feb 12 2010	Feb 10 2011	RNA	1	colorectal cancer cell line	Homo sapiens	cell line: HT-29	medium: McCoy's	sf2: 0.81060606060606	rep: 3	No treatment prior to expression profiling analysis.	Twelve human colorectal cancer cell lines were obtained from the American Type Culture Collection (ATCC, Manassas, VA): Caco-2, HT-29, LS411N, LS513, LS1034, SW403, SW480, SW620, SW837, SW1116, SW1463, and WiDr. All lines were cultured in their recommended medium (Invitrogen, Karlsruhe, Germany), supplemented with fetal bovine serum (Pan, Aidenbach, Germany) and 2mM L-glutamine (BioWhittaker, Ver…	total RNA	Total RNA was isolated using the RNeasy Mini kit (Qiagen, Hilden, Germany) according to the manufacturer's instructions, including a DNase treatment step. Nucleic acid quantity, quality and purity were determined using NanoDrop ND-1000 spectrophotometer (Peqlab, Erlangen, Germany) and a 2100 Bioanalyzer (Agilent Technologies, Palo Alto, CA). Only RNA samples with a RNA integrity number > 9.5 were…	Cy3	800 ng of total RNA were reverse-transcribed, amplified and labeled with Cy3 using the Low RNA Input Linear Amplification Kit, PLUS (Agilent Technologies). After purification, the cRNA yield and integration of cyanine 3-CTP was measured using a spectrophotometer. cRNA with a specific activity > 9.0 pmol/碌g was excluded from further experiments.	9606	Subsequently, 1.65 碌g of labeled cRNA per sample was fragmentized and hybridized overnight to a 4x44k gene expression microarray (Agilent Technologies). After a washing step the arrays were scanned on an Agilent DNA microarray scanner G2505B (Agilent Technologies) at 5 micron resolution. Scanned image files were visually inspected for artifacts and subsequently analyzed.	Agilent DNA microarray scanner G2505B, 5 micron resolution	Cell line: HT-29; Medium: McCoy's; SF2: 0.81	Median signal intensities from the Feature Extraction Software were converted to log2 and quantile normalized using the R package 鈥渓imma鈥?	GPL4133	Melanie,,Spitzner	melanie.spitzner@med.uni-goettingen.de	+49 (0) 551 - 39 10478	Department of General and Visceral Surgery	Georg-August-University Goettingen	Robert-Koch-Str. 40	Goettingen	37075	Germany	ftp://ftp.ncbi.nlm.nih.gov/geo/samples/GSM508nnn/GSM508828/suppl/GSM508828_Grade2_251485050467_S01_GE1-v5_95_Feb07_1_2.txt.gz	45015	HT-29	McCoy's	3	0.810606
GSM508829	ls1034.rpmi.3	GSM508829	Public on Feb 10 2011	Feb 12 2010	Feb 10 2011	RNA	1	colorectal cancer cell line	Homo sapiens	cell line: LS1034	medium: RPMI	sf2: 0.585743801652893	rep: 3	No treatment prior to expression profiling analysis.	Twelve human colorectal cancer cell lines were obtained from the American Type Culture Collection (ATCC, Manassas, VA): Caco-2, HT-29, LS411N, LS513, LS1034, SW403, SW480, SW620, SW837, SW1116, SW1463, and WiDr. All lines were cultured in their recommended medium (Invitrogen, Karlsruhe, Germany), supplemented with fetal bovine serum (Pan, Aidenbach, Germany) and 2mM L-glutamine (BioWhittaker, Ver…	total RNA	Total RNA was isolated using the RNeasy Mini kit (Qiagen, Hilden, Germany) according to the manufacturer's instructions, including a DNase treatment step. Nucleic acid quantity, quality and purity were determined using NanoDrop ND-1000 spectrophotometer (Peqlab, Erlangen, Germany) and a 2100 Bioanalyzer (Agilent Technologies, Palo Alto, CA). Only RNA samples with a RNA integrity number > 9.5 were…	Cy3	800 ng of total RNA were reverse-transcribed, amplified and labeled with Cy3 using the Low RNA Input Linear Amplification Kit, PLUS (Agilent Technologies). After purification, the cRNA yield and integration of cyanine 3-CTP was measured using a spectrophotometer. cRNA with a specific activity > 9.0 pmol/碌g was excluded from further experiments.	9606	Subsequently, 1.65 碌g of labeled cRNA per sample was fragmentized and hybridized overnight to a 4x44k gene expression microarray (Agilent Technologies). After a washing step the arrays were scanned on an Agilent DNA microarray scanner G2505B (Agilent Technologies) at 5 micron resolution. Scanned image files were visually inspected for artifacts and subsequently analyzed.	Agilent DNA microarray scanner G2505B, 5 micron resolution	Cell line: LS1034; Medium: RPMI; SF2: 0.59	Median signal intensities from the Feature Extraction Software were converted to log2 and quantile normalized using the R package 鈥渓imma鈥?	GPL4133	Melanie,,Spitzner	melanie.spitzner@med.uni-goettingen.de	+49 (0) 551 - 39 10478	Department of General and Visceral Surgery	Georg-August-University Goettingen	Robert-Koch-Str. 40	Goettingen	37075	Germany	ftp://ftp.ncbi.nlm.nih.gov/geo/samples/GSM508nnn/GSM508829/suppl/GSM508829_Grade2_251485050467_S01_GE1-v5_95_Feb07_1_3.txt.gz	45015	LS1034	RPMI	3	0.585744
GSM508830	sw480.l15.3	GSM508830	Public on Feb 10 2011	Feb 12 2010	Feb 10 2011	RNA	1	colorectal cancer cell line	Homo sapiens	cell line: SW480	medium: L-15	sf2: 0.552884615384615	rep: 3	No treatment prior to expression profiling analysis.	Twelve human colorectal cancer cell lines were obtained from the American Type Culture Collection (ATCC, Manassas, VA): Caco-2, HT-29, LS411N, LS513, LS1034, SW403, SW480, SW620, SW837, SW1116, SW1463, and WiDr. All lines were cultured in their recommended medium (Invitrogen, Karlsruhe, Germany), supplemented with fetal bovine serum (Pan, Aidenbach, Germany) and 2mM L-glutamine (BioWhittaker, Ver…	total RNA	Total RNA was isolated using the RNeasy Mini kit (Qiagen, Hilden, Germany) according to the manufacturer's instructions, including a DNase treatment step. Nucleic acid quantity, quality and purity were determined using NanoDrop ND-1000 spectrophotometer (Peqlab, Erlangen, Germany) and a 2100 Bioanalyzer (Agilent Technologies, Palo Alto, CA). Only RNA samples with a RNA integrity number > 9.5 were…	Cy3	800 ng of total RNA were reverse-transcribed, amplified and labeled with Cy3 using the Low RNA Input Linear Amplification Kit, PLUS (Agilent Technologies). After purification, the cRNA yield and integration of cyanine 3-CTP was measured using a spectrophotometer. cRNA with a specific activity > 9.0 pmol/碌g was excluded from further experiments.	9606	Subsequently, 1.65 碌g of labeled cRNA per sample was fragmentized and hybridized overnight to a 4x44k gene expression microarray (Agilent Technologies). After a washing step the arrays were scanned on an Agilent DNA microarray scanner G2505B (Agilent Technologies) at 5 micron resolution. Scanned image files were visually inspected for artifacts and subsequently analyzed.	Agilent DNA microarray scanner G2505B, 5 micron resolution	Cell line: SW480; Medium: L-15; SF2: 0.55	Median signal intensities from the Feature Extraction Software were converted to log2 and quantile normalized using the R package 鈥渓imma鈥?	GPL4133	Melanie,,Spitzner	melanie.spitzner@med.uni-goettingen.de	+49 (0) 551 - 39 10478	Department of General and Visceral Surgery	Georg-August-University Goettingen	Robert-Koch-Str. 40	Goettingen	37075	Germany	ftp://ftp.ncbi.nlm.nih.gov/geo/samples/GSM508nnn/GSM508830/suppl/GSM508830_Grade2_251485050467_S01_GE1-v5_95_Feb07_1_4.txt.gz	45015	SW480	L-15	3	0.552885
GSM508831	sw837.rpmi.1	GSM508831	Public on Feb 10 2011	Feb 12 2010	Feb 10 2011	RNA	1	colorectal cancer cell line	Homo sapiens	cell line: SW837	medium: RPMI	sf2: NA	rep: 1	No treatment prior to expression profiling analysis.	Twelve human colorectal cancer cell lines were obtained from the American Type Culture Collection (ATCC, Manassas, VA): Caco-2, HT-29, LS411N, LS513, LS1034, SW403, SW480, SW620, SW837, SW1116, SW1463, and WiDr. All lines were cultured in their recommended medium (Invitrogen, Karlsruhe, Germany), supplemented with fetal bovine serum (Pan, Aidenbach, Germany) and 2mM L-glutamine (BioWhittaker, Ver…	total RNA	Total RNA was isolated using the RNeasy Mini kit (Qiagen, Hilden, Germany) according to the manufacturer's instructions, including a DNase treatment step. Nucleic acid quantity, quality and purity were determined using NanoDrop ND-1000 spectrophotometer (Peqlab, Erlangen, Germany) and a 2100 Bioanalyzer (Agilent Technologies, Palo Alto, CA). Only RNA samples with a RNA integrity number > 9.5 were…	Cy3	800 ng of total RNA were reverse-transcribed, amplified and labeled with Cy3 using the Low RNA Input Linear Amplification Kit, PLUS (Agilent Technologies). After purification, the cRNA yield and integration of cyanine 3-CTP was measured using a spectrophotometer. cRNA with a specific activity > 9.0 pmol/碌g was excluded from further experiments.	9606	Subsequently, 1.65 碌g of labeled cRNA per sample was fragmentized and hybridized overnight to a 4x44k gene expression microarray (Agilent Technologies). After a washing step the arrays were scanned on an Agilent DNA microarray scanner G2505B (Agilent Technologies) at 5 micron resolution. Scanned image files were visually inspected for artifacts and subsequently analyzed.	Agilent DNA microarray scanner G2505B, 5 micron resolution	Cell line: SW837; Medium: RPMI	Median signal intensities from the Feature Extraction Software were converted to log2 and quantile normalized using the R package 鈥渓imma鈥?	GPL4133	Melanie,,Spitzner	melanie.spitzner@med.uni-goettingen.de	+49 (0) 551 - 39 10478	Department of General and Visceral Surgery	Georg-August-University Goettingen	Robert-Koch-Str. 40	Goettingen	37075	Germany	ftp://ftp.ncbi.nlm.nih.gov/geo/samples/GSM508nnn/GSM508831/suppl/GSM508831_Grade2_251485050424_S01_GE1-v5_95_Feb07_1_1.txt.gz	45015	SW837	RPMI	1	NA
GSM508832	sw1116.l15.3	GSM508832	Public on Feb 10 2011	Feb 12 2010	Feb 10 2011	RNA	1	colorectal cancer cell line	Homo sapiens	cell line: SW1116	medium: L-15	sf2: 0.682692307692308	rep: 3	No treatment prior to expression profiling analysis.	Twelve human colorectal cancer cell lines were obtained from the American Type Culture Collection (ATCC, Manassas, VA): Caco-2, HT-29, LS411N, LS513, LS1034, SW403, SW480, SW620, SW837, SW1116, SW1463, and WiDr. All lines were cultured in their recommended medium (Invitrogen, Karlsruhe, Germany), supplemented with fetal bovine serum (Pan, Aidenbach, Germany) and 2mM L-glutamine (BioWhittaker, Ver…	total RNA	Total RNA was isolated using the RNeasy Mini kit (Qiagen, Hilden, Germany) according to the manufacturer's instructions, including a DNase treatment step. Nucleic acid quantity, quality and purity were determined using NanoDrop ND-1000 spectrophotometer (Peqlab, Erlangen, Germany) and a 2100 Bioanalyzer (Agilent Technologies, Palo Alto, CA). Only RNA samples with a RNA integrity number > 9.5 were…	Cy3	800 ng of total RNA were reverse-transcribed, amplified and labeled with Cy3 using the Low RNA Input Linear Amplification Kit, PLUS (Agilent Technologies). After purification, the cRNA yield and integration of cyanine 3-CTP was measured using a spectrophotometer. cRNA with a specific activity > 9.0 pmol/碌g was excluded from further experiments.	9606	Subsequently, 1.65 碌g of labeled cRNA per sample was fragmentized and hybridized overnight to a 4x44k gene expression microarray (Agilent Technologies). After a washing step the arrays were scanned on an Agilent DNA microarray scanner G2505B (Agilent Technologies) at 5 micron resolution. Scanned image files were visually inspected for artifacts and subsequently analyzed.	Agilent DNA microarray scanner G2505B, 5 micron resolution	Cell line: SW1116; Medium: L-15; SF2: 0.68	Median signal intensities from the Feature Extraction Software were converted to log2 and quantile normalized using the R package 鈥渓imma鈥?	GPL4133	Melanie,,Spitzner	melanie.spitzner@med.uni-goettingen.de	+49 (0) 551 - 39 10478	Department of General and Visceral Surgery	Georg-August-University Goettingen	Robert-Koch-Str. 40	Goettingen	37075	Germany	ftp://ftp.ncbi.nlm.nih.gov/geo/samples/GSM508nnn/GSM508832/suppl/GSM508832_Grade2_251485050424_S01_GE1-v5_95_Feb07_1_3.txt.gz	45015	SW1116	L-15	3	0.682692
GSM508833	sw837.l15.1	GSM508833	Public on Feb 10 2011	Feb 12 2010	Feb 10 2011	RNA	1	colorectal cancer cell line	Homo sapiens	cell line: SW837	medium: L-15	sf2: 0.710691823899371	rep: 1	No treatment prior to expression profiling analysis.	Twelve human colorectal cancer cell lines were obtained from the American Type Culture Collection (ATCC, Manassas, VA): Caco-2, HT-29, LS411N, LS513, LS1034, SW403, SW480, SW620, SW837, SW1116, SW1463, and WiDr. All lines were cultured in their recommended medium (Invitrogen, Karlsruhe, Germany), supplemented with fetal bovine serum (Pan, Aidenbach, Germany) and 2mM L-glutamine (BioWhittaker, Ver…	total RNA	Total RNA was isolated using the RNeasy Mini kit (Qiagen, Hilden, Germany) according to the manufacturer's instructions, including a DNase treatment step. Nucleic acid quantity, quality and purity were determined using NanoDrop ND-1000 spectrophotometer (Peqlab, Erlangen, Germany) and a 2100 Bioanalyzer (Agilent Technologies, Palo Alto, CA). Only RNA samples with a RNA integrity number > 9.5 were…	Cy3	800 ng of total RNA were reverse-transcribed, amplified and labeled with Cy3 using the Low RNA Input Linear Amplification Kit, PLUS (Agilent Technologies). After purification, the cRNA yield and integration of cyanine 3-CTP was measured using a spectrophotometer. cRNA with a specific activity > 9.0 pmol/碌g was excluded from further experiments.	9606	Subsequently, 1.65 碌g of labeled cRNA per sample was fragmentized and hybridized overnight to a 4x44k gene expression microarray (Agilent Technologies). After a washing step the arrays were scanned on an Agilent DNA microarray scanner G2505B (Agilent Technologies) at 5 micron resolution. Scanned image files were visually inspected for artifacts and subsequently analyzed.	Agilent DNA microarray scanner G2505B, 5 micron resolution	Cell line: SW837; Medium: L-15; SF2: 0.71	Median signal intensities from the Feature Extraction Software were converted to log2 and quantile normalized using the R package 鈥渓imma鈥?	GPL4133	Melanie,,Spitzner	melanie.spitzner@med.uni-goettingen.de	+49 (0) 551 - 39 10478	Department of General and Visceral Surgery	Georg-August-University Goettingen	Robert-Koch-Str. 40	Goettingen	37075	Germany	ftp://ftp.ncbi.nlm.nih.gov/geo/samples/GSM508nnn/GSM508833/suppl/GSM508833_Grade2_251485050424_S01_GE1-v5_95_Feb07_1_4.txt.gz	45015	SW837	L-15	1	0.710692
GSM508834	caco2.mem.3	GSM508834	Public on Feb 10 2011	Feb 12 2010	Feb 10 2011	RNA	1	colorectal cancer cell line	Homo sapiens	cell line: Caco-2	medium: MEM	sf2: 0.583333333333333	rep: 3	No treatment prior to expression profiling analysis.	Twelve human colorectal cancer cell lines were obtained from the American Type Culture Collection (ATCC, Manassas, VA): Caco-2, HT-29, LS411N, LS513, LS1034, SW403, SW480, SW620, SW837, SW1116, SW1463, and WiDr. All lines were cultured in their recommended medium (Invitrogen, Karlsruhe, Germany), supplemented with fetal bovine serum (Pan, Aidenbach, Germany) and 2mM L-glutamine (BioWhittaker, Ver…	total RNA	Total RNA was isolated using the RNeasy Mini kit (Qiagen, Hilden, Germany) according to the manufacturer's instructions, including a DNase treatment step. Nucleic acid quantity, quality and purity were determined using NanoDrop ND-1000 spectrophotometer (Peqlab, Erlangen, Germany) and a 2100 Bioanalyzer (Agilent Technologies, Palo Alto, CA). Only RNA samples with a RNA integrity number > 9.5 were…	Cy3	800 ng of total RNA were reverse-transcribed, amplified and labeled with Cy3 using the Low RNA Input Linear Amplification Kit, PLUS (Agilent Technologies). After purification, the cRNA yield and integration of cyanine 3-CTP was measured using a spectrophotometer. cRNA with a specific activity > 9.0 pmol/碌g was excluded from further experiments.	9606	Subsequently, 1.65 碌g of labeled cRNA per sample was fragmentized and hybridized overnight to a 4x44k gene expression microarray (Agilent Technologies). After a washing step the arrays were scanned on an Agilent DNA microarray scanner G2505B (Agilent Technologies) at 5 micron resolution. Scanned image files were visually inspected for artifacts and subsequently analyzed.	Agilent DNA microarray scanner G2505B, 5 micron resolution	Cell line: Caco-2; Medium: MEM; SF2: 0.58	Median signal intensities from the Feature Extraction Software were converted to log2 and quantile normalized using the R package 鈥渓imma鈥?	GPL4133	Melanie,,Spitzner	melanie.spitzner@med.uni-goettingen.de	+49 (0) 551 - 39 10478	Department of General and Visceral Surgery	Georg-August-University Goettingen	Robert-Koch-Str. 40	Goettingen	37075	Germany	ftp://ftp.ncbi.nlm.nih.gov/geo/samples/GSM508nnn/GSM508834/suppl/GSM508834_Grade2_251485050426_S01_GE1-v5_95_Feb07_1_1.txt.gz	45015	Caco-2	MEM	3	0.583333
GSM508835	sw1463.l15.3	GSM508835	Public on Feb 10 2011	Feb 12 2010	Feb 10 2011	RNA	1	colorectal cancer cell line	Homo sapiens	cell line: SW1463	medium: L-15	sf2: 0.559139784946237	rep: 3	No treatment prior to expression profiling analysis.	Twelve human colorectal cancer cell lines were obtained from the American Type Culture Collection (ATCC, Manassas, VA): Caco-2, HT-29, LS411N, LS513, LS1034, SW403, SW480, SW620, SW837, SW1116, SW1463, and WiDr. All lines were cultured in their recommended medium (Invitrogen, Karlsruhe, Germany), supplemented with fetal bovine serum (Pan, Aidenbach, Germany) and 2mM L-glutamine (BioWhittaker, Ver…	total RNA	Total RNA was isolated using the RNeasy Mini kit (Qiagen, Hilden, Germany) according to the manufacturer's instructions, including a DNase treatment step. Nucleic acid quantity, quality and purity were determined using NanoDrop ND-1000 spectrophotometer (Peqlab, Erlangen, Germany) and a 2100 Bioanalyzer (Agilent Technologies, Palo Alto, CA). Only RNA samples with a RNA integrity number > 9.5 were…	Cy3	800 ng of total RNA were reverse-transcribed, amplified and labeled with Cy3 using the Low RNA Input Linear Amplification Kit, PLUS (Agilent Technologies). After purification, the cRNA yield and integration of cyanine 3-CTP was measured using a spectrophotometer. cRNA with a specific activity > 9.0 pmol/碌g was excluded from further experiments.	9606	Subsequently, 1.65 碌g of labeled cRNA per sample was fragmentized and hybridized overnight to a 4x44k gene expression microarray (Agilent Technologies). After a washing step the arrays were scanned on an Agilent DNA microarray scanner G2505B (Agilent Technologies) at 5 micron resolution. Scanned image files were visually inspected for artifacts and subsequently analyzed.	Agilent DNA microarray scanner G2505B, 5 micron resolution	Cell line: SW1463; Medium: L-15; SF2: 0.56	Median signal intensities from the Feature Extraction Software were converted to log2 and quantile normalized using the R package 鈥渓imma鈥?	GPL4133	Melanie,,Spitzner	melanie.spitzner@med.uni-goettingen.de	+49 (0) 551 - 39 10478	Department of General and Visceral Surgery	Georg-August-University Goettingen	Robert-Koch-Str. 40	Goettingen	37075	Germany	ftp://ftp.ncbi.nlm.nih.gov/geo/samples/GSM508nnn/GSM508835/suppl/GSM508835_Grade2_251485050426_S01_GE1-v5_95_Feb07_1_2.txt.gz	45015	SW1463	L-15	3	0.55914
GSM508836	ls1034.rpmi.1	GSM508836	Public on Feb 10 2011	Feb 12 2010	Feb 10 2011	RNA	1	colorectal cancer cell line	Homo sapiens	cell line: LS1034	medium: RPMI	sf2: 0.585743801652893	rep: 1	No treatment prior to expression profiling analysis.	Twelve human colorectal cancer cell lines were obtained from the American Type Culture Collection (ATCC, Manassas, VA): Caco-2, HT-29, LS411N, LS513, LS1034, SW403, SW480, SW620, SW837, SW1116, SW1463, and WiDr. All lines were cultured in their recommended medium (Invitrogen, Karlsruhe, Germany), supplemented with fetal bovine serum (Pan, Aidenbach, Germany) and 2mM L-glutamine (BioWhittaker, Ver…	total RNA	Total RNA was isolated using the RNeasy Mini kit (Qiagen, Hilden, Germany) according to the manufacturer's instructions, including a DNase treatment step. Nucleic acid quantity, quality and purity were determined using NanoDrop ND-1000 spectrophotometer (Peqlab, Erlangen, Germany) and a 2100 Bioanalyzer (Agilent Technologies, Palo Alto, CA). Only RNA samples with a RNA integrity number > 9.5 were…	Cy3	800 ng of total RNA were reverse-transcribed, amplified and labeled with Cy3 using the Low RNA Input Linear Amplification Kit, PLUS (Agilent Technologies). After purification, the cRNA yield and integration of cyanine 3-CTP was measured using a spectrophotometer. cRNA with a specific activity > 9.0 pmol/碌g was excluded from further experiments.	9606	Subsequently, 1.65 碌g of labeled cRNA per sample was fragmentized and hybridized overnight to a 4x44k gene expression microarray (Agilent Technologies). After a washing step the arrays were scanned on an Agilent DNA microarray scanner G2505B (Agilent Technologies) at 5 micron resolution. Scanned image files were visually inspected for artifacts and subsequently analyzed.	Agilent DNA microarray scanner G2505B, 5 micron resolution	Cell line: LS1034; Medium: RPMI; SF2: 0.59	Median signal intensities from the Feature Extraction Software were converted to log2 and quantile normalized using the R package 鈥渓imma鈥?	GPL4133	Melanie,,Spitzner	melanie.spitzner@med.uni-goettingen.de	+49 (0) 551 - 39 10478	Department of General and Visceral Surgery	Georg-August-University Goettingen	Robert-Koch-Str. 40	Goettingen	37075	Germany	ftp://ftp.ncbi.nlm.nih.gov/geo/samples/GSM508nnn/GSM508836/suppl/GSM508836_Grade2_251485050426_S01_GE1-v5_95_Feb07_1_3.txt.gz	45015	LS1034	RPMI	1	0.585744
GSM508837	widr.mem.3	GSM508837	Public on Feb 10 2011	Feb 12 2010	Feb 10 2011	RNA	1	colorectal cancer cell line	Homo sapiens	cell line: WiDr	medium: MEM	sf2: 0.395744680851064	rep: 3	No treatment prior to expression profiling analysis.	Twelve human colorectal cancer cell lines were obtained from the American Type Culture Collection (ATCC, Manassas, VA): Caco-2, HT-29, LS411N, LS513, LS1034, SW403, SW480, SW620, SW837, SW1116, SW1463, and WiDr. All lines were cultured in their recommended medium (Invitrogen, Karlsruhe, Germany), supplemented with fetal bovine serum (Pan, Aidenbach, Germany) and 2mM L-glutamine (BioWhittaker, Ver…	total RNA	Total RNA was isolated using the RNeasy Mini kit (Qiagen, Hilden, Germany) according to the manufacturer's instructions, including a DNase treatment step. Nucleic acid quantity, quality and purity were determined using NanoDrop ND-1000 spectrophotometer (Peqlab, Erlangen, Germany) and a 2100 Bioanalyzer (Agilent Technologies, Palo Alto, CA). Only RNA samples with a RNA integrity number > 9.5 were…	Cy3	800 ng of total RNA were reverse-transcribed, amplified and labeled with Cy3 using the Low RNA Input Linear Amplification Kit, PLUS (Agilent Technologies). After purification, the cRNA yield and integration of cyanine 3-CTP was measured using a spectrophotometer. cRNA with a specific activity > 9.0 pmol/碌g was excluded from further experiments.	9606	Subsequently, 1.65 碌g of labeled cRNA per sample was fragmentized and hybridized overnight to a 4x44k gene expression microarray (Agilent Technologies). After a washing step the arrays were scanned on an Agilent DNA microarray scanner G2505B (Agilent Technologies) at 5 micron resolution. Scanned image files were visually inspected for artifacts and subsequently analyzed.	Agilent DNA microarray scanner G2505B, 5 micron resolution	Cell line: WiDr; Medium: MEM; SF2: 0.4	Median signal intensities from the Feature Extraction Software were converted to log2 and quantile normalized using the R package 鈥渓imma鈥?	GPL4133	Melanie,,Spitzner	melanie.spitzner@med.uni-goettingen.de	+49 (0) 551 - 39 10478	Department of General and Visceral Surgery	Georg-August-University Goettingen	Robert-Koch-Str. 40	Goettingen	37075	Germany	ftp://ftp.ncbi.nlm.nih.gov/geo/samples/GSM508nnn/GSM508837/suppl/GSM508837_Grade2_251485050427_S01_GE1-v5_95_Feb07_1_1.txt.gz	45015	WiDr	MEM	3	0.395745
GSM508838	ls411n.rpmi.2	GSM508838	Public on Feb 10 2011	Feb 12 2010	Feb 10 2011	RNA	1	colorectal cancer cell line	Homo sapiens	cell line: LS411N	medium: RPMI	sf2: 0.28287841191067	rep: 2	No treatment prior to expression profiling analysis.	Twelve human colorectal cancer cell lines were obtained from the American Type Culture Collection (ATCC, Manassas, VA): Caco-2, HT-29, LS411N, LS513, LS1034, SW403, SW480, SW620, SW837, SW1116, SW1463, and WiDr. All lines were cultured in their recommended medium (Invitrogen, Karlsruhe, Germany), supplemented with fetal bovine serum (Pan, Aidenbach, Germany) and 2mM L-glutamine (BioWhittaker, Ver…	total RNA	Total RNA was isolated using the RNeasy Mini kit (Qiagen, Hilden, Germany) according to the manufacturer's instructions, including a DNase treatment step. Nucleic acid quantity, quality and purity were determined using NanoDrop ND-1000 spectrophotometer (Peqlab, Erlangen, Germany) and a 2100 Bioanalyzer (Agilent Technologies, Palo Alto, CA). Only RNA samples with a RNA integrity number > 9.5 were…	Cy3	800 ng of total RNA were reverse-transcribed, amplified and labeled with Cy3 using the Low RNA Input Linear Amplification Kit, PLUS (Agilent Technologies). After purification, the cRNA yield and integration of cyanine 3-CTP was measured using a spectrophotometer. cRNA with a specific activity > 9.0 pmol/碌g was excluded from further experiments.	9606	Subsequently, 1.65 碌g of labeled cRNA per sample was fragmentized and hybridized overnight to a 4x44k gene expression microarray (Agilent Technologies). After a washing step the arrays were scanned on an Agilent DNA microarray scanner G2505B (Agilent Technologies) at 5 micron resolution. Scanned image files were visually inspected for artifacts and subsequently analyzed.	Agilent DNA microarray scanner G2505B, 5 micron resolution	Cell line: LS411N; Medium: RPMI; SF2: 0.28	Median signal intensities from the Feature Extraction Software were converted to log2 and quantile normalized using the R package 鈥渓imma鈥?	GPL4133	Melanie,,Spitzner	melanie.spitzner@med.uni-goettingen.de	+49 (0) 551 - 39 10478	Department of General and Visceral Surgery	Georg-August-University Goettingen	Robert-Koch-Str. 40	Goettingen	37075	Germany	ftp://ftp.ncbi.nlm.nih.gov/geo/samples/GSM508nnn/GSM508838/suppl/GSM508838_Grade2_251485050427_S01_GE1-v5_95_Feb07_1_2.txt.gz	45015	LS411N	RPMI	2	0.282878
GSM508839	ht29.mccoy.1	GSM508839	Public on Feb 10 2011	Feb 12 2010	Feb 10 2011	RNA	1	colorectal cancer cell line	Homo sapiens	cell line: HT-29	medium: McCoy's	sf2: 0.81060606060606	rep: 1	No treatment prior to expression profiling analysis.	Twelve human colorectal cancer cell lines were obtained from the American Type Culture Collection (ATCC, Manassas, VA): Caco-2, HT-29, LS411N, LS513, LS1034, SW403, SW480, SW620, SW837, SW1116, SW1463, and WiDr. All lines were cultured in their recommended medium (Invitrogen, Karlsruhe, Germany), supplemented with fetal bovine serum (Pan, Aidenbach, Germany) and 2mM L-glutamine (BioWhittaker, Ver…	total RNA	Total RNA was isolated using the RNeasy Mini kit (Qiagen, Hilden, Germany) according to the manufacturer's instructions, including a DNase treatment step. Nucleic acid quantity, quality and purity were determined using NanoDrop ND-1000 spectrophotometer (Peqlab, Erlangen, Germany) and a 2100 Bioanalyzer (Agilent Technologies, Palo Alto, CA). Only RNA samples with a RNA integrity number > 9.5 were…	Cy3	800 ng of total RNA were reverse-transcribed, amplified and labeled with Cy3 using the Low RNA Input Linear Amplification Kit, PLUS (Agilent Technologies). After purification, the cRNA yield and integration of cyanine 3-CTP was measured using a spectrophotometer. cRNA with a specific activity > 9.0 pmol/碌g was excluded from further experiments.	9606	Subsequently, 1.65 碌g of labeled cRNA per sample was fragmentized and hybridized overnight to a 4x44k gene expression microarray (Agilent Technologies). After a washing step the arrays were scanned on an Agilent DNA microarray scanner G2505B (Agilent Technologies) at 5 micron resolution. Scanned image files were visually inspected for artifacts and subsequently analyzed.	Agilent DNA microarray scanner G2505B, 5 micron resolution	Cell line: HT-29; Medium: McCoy's; SF2: 0.81	Median signal intensities from the Feature Extraction Software were converted to log2 and quantile normalized using the R package 鈥渓imma鈥?	GPL4133	Melanie,,Spitzner	melanie.spitzner@med.uni-goettingen.de	+49 (0) 551 - 39 10478	Department of General and Visceral Surgery	Georg-August-University Goettingen	Robert-Koch-Str. 40	Goettingen	37075	Germany	ftp://ftp.ncbi.nlm.nih.gov/geo/samples/GSM508nnn/GSM508839/suppl/GSM508839_Grade2_251485050427_S01_GE1-v5_95_Feb07_1_3.txt.gz	45015	HT-29	McCoy's	1	0.810606
GSM508840	widr.mem.1	GSM508840	Public on Feb 10 2011	Feb 12 2010	Feb 10 2011	RNA	1	colorectal cancer cell line	Homo sapiens	cell line: WiDr	medium: MEM	sf2: 0.395744680851064	rep: 1	No treatment prior to expression profiling analysis.	Twelve human colorectal cancer cell lines were obtained from the American Type Culture Collection (ATCC, Manassas, VA): Caco-2, HT-29, LS411N, LS513, LS1034, SW403, SW480, SW620, SW837, SW1116, SW1463, and WiDr. All lines were cultured in their recommended medium (Invitrogen, Karlsruhe, Germany), supplemented with fetal bovine serum (Pan, Aidenbach, Germany) and 2mM L-glutamine (BioWhittaker, Ver…	total RNA	Total RNA was isolated using the RNeasy Mini kit (Qiagen, Hilden, Germany) according to the manufacturer's instructions, including a DNase treatment step. Nucleic acid quantity, quality and purity were determined using NanoDrop ND-1000 spectrophotometer (Peqlab, Erlangen, Germany) and a 2100 Bioanalyzer (Agilent Technologies, Palo Alto, CA). Only RNA samples with a RNA integrity number > 9.5 were…	Cy3	800 ng of total RNA were reverse-transcribed, amplified and labeled with Cy3 using the Low RNA Input Linear Amplification Kit, PLUS (Agilent Technologies). After purification, the cRNA yield and integration of cyanine 3-CTP was measured using a spectrophotometer. cRNA with a specific activity > 9.0 pmol/碌g was excluded from further experiments.	9606	Subsequently, 1.65 碌g of labeled cRNA per sample was fragmentized and hybridized overnight to a 4x44k gene expression microarray (Agilent Technologies). After a washing step the arrays were scanned on an Agilent DNA microarray scanner G2505B (Agilent Technologies) at 5 micron resolution. Scanned image files were visually inspected for artifacts and subsequently analyzed.	Agilent DNA microarray scanner G2505B, 5 micron resolution	Cell line: WiDr; Medium: MEM; SF2: 0.4	Median signal intensities from the Feature Extraction Software were converted to log2 and quantile normalized using the R package 鈥渓imma鈥?	GPL4133	Melanie,,Spitzner	melanie.spitzner@med.uni-goettingen.de	+49 (0) 551 - 39 10478	Department of General and Visceral Surgery	Georg-August-University Goettingen	Robert-Koch-Str. 40	Goettingen	37075	Germany	ftp://ftp.ncbi.nlm.nih.gov/geo/samples/GSM508nnn/GSM508840/suppl/GSM508840_Grade2_251485050786_S01_GE1-v5_95_Feb07_1_1.txt.gz	45015	WiDr	MEM	1	0.395745
GSM508841	sw837.l15.3	GSM508841	Public on Feb 10 2011	Feb 12 2010	Feb 10 2011	RNA	1	colorectal cancer cell line	Homo sapiens	cell line: SW837	medium: L-15	sf2: 0.710691823899371	rep: 3	No treatment prior to expression profiling analysis.	Twelve human colorectal cancer cell lines were obtained from the American Type Culture Collection (ATCC, Manassas, VA): Caco-2, HT-29, LS411N, LS513, LS1034, SW403, SW480, SW620, SW837, SW1116, SW1463, and WiDr. All lines were cultured in their recommended medium (Invitrogen, Karlsruhe, Germany), supplemented with fetal bovine serum (Pan, Aidenbach, Germany) and 2mM L-glutamine (BioWhittaker, Ver…	total RNA	Total RNA was isolated using the RNeasy Mini kit (Qiagen, Hilden, Germany) according to the manufacturer's instructions, including a DNase treatment step. Nucleic acid quantity, quality and purity were determined using NanoDrop ND-1000 spectrophotometer (Peqlab, Erlangen, Germany) and a 2100 Bioanalyzer (Agilent Technologies, Palo Alto, CA). Only RNA samples with a RNA integrity number > 9.5 were…	Cy3	800 ng of total RNA were reverse-transcribed, amplified and labeled with Cy3 using the Low RNA Input Linear Amplification Kit, PLUS (Agilent Technologies). After purification, the cRNA yield and integration of cyanine 3-CTP was measured using a spectrophotometer. cRNA with a specific activity > 9.0 pmol/碌g was excluded from further experiments.	9606	Subsequently, 1.65 碌g of labeled cRNA per sample was fragmentized and hybridized overnight to a 4x44k gene expression microarray (Agilent Technologies). After a washing step the arrays were scanned on an Agilent DNA microarray scanner G2505B (Agilent Technologies) at 5 micron resolution. Scanned image files were visually inspected for artifacts and subsequently analyzed.	Agilent DNA microarray scanner G2505B, 5 micron resolution	Cell line: SW837; Medium: L-15; SF2: 0.71	Median signal intensities from the Feature Extraction Software were converted to log2 and quantile normalized using the R package 鈥渓imma鈥?	GPL4133	Melanie,,Spitzner	melanie.spitzner@med.uni-goettingen.de	+49 (0) 551 - 39 10478	Department of General and Visceral Surgery	Georg-August-University Goettingen	Robert-Koch-Str. 40	Goettingen	37075	Germany	ftp://ftp.ncbi.nlm.nih.gov/geo/samples/GSM508nnn/GSM508841/suppl/GSM508841_Grade2_251485050786_S01_GE1-v5_95_Feb07_1_2.txt.gz	45015	SW837	L-15	3	0.710692
GSM508842	sw403.l15.2	GSM508842	Public on Feb 10 2011	Feb 12 2010	Feb 10 2011	RNA	1	colorectal cancer cell line	Homo sapiens	cell line: SW403	medium: L-15	sf2: 0.757894736842105	rep: 2	No treatment prior to expression profiling analysis.	Twelve human colorectal cancer cell lines were obtained from the American Type Culture Collection (ATCC, Manassas, VA): Caco-2, HT-29, LS411N, LS513, LS1034, SW403, SW480, SW620, SW837, SW1116, SW1463, and WiDr. All lines were cultured in their recommended medium (Invitrogen, Karlsruhe, Germany), supplemented with fetal bovine serum (Pan, Aidenbach, Germany) and 2mM L-glutamine (BioWhittaker, Ver…	total RNA	Total RNA was isolated using the RNeasy Mini kit (Qiagen, Hilden, Germany) according to the manufacturer's instructions, including a DNase treatment step. Nucleic acid quantity, quality and purity were determined using NanoDrop ND-1000 spectrophotometer (Peqlab, Erlangen, Germany) and a 2100 Bioanalyzer (Agilent Technologies, Palo Alto, CA). Only RNA samples with a RNA integrity number > 9.5 were…	Cy3	800 ng of total RNA were reverse-transcribed, amplified and labeled with Cy3 using the Low RNA Input Linear Amplification Kit, PLUS (Agilent Technologies). After purification, the cRNA yield and integration of cyanine 3-CTP was measured using a spectrophotometer. cRNA with a specific activity > 9.0 pmol/碌g was excluded from further experiments.	9606	Subsequently, 1.65 碌g of labeled cRNA per sample was fragmentized and hybridized overnight to a 4x44k gene expression microarray (Agilent Technologies). After a washing step the arrays were scanned on an Agilent DNA microarray scanner G2505B (Agilent Technologies) at 5 micron resolution. Scanned image files were visually inspected for artifacts and subsequently analyzed.	Agilent DNA microarray scanner G2505B, 5 micron resolution	Cell line: SW403; Medium: L-15; SF2: 0.76	Median signal intensities from the Feature Extraction Software were converted to log2 and quantile normalized using the R package 鈥渓imma鈥?	GPL4133	Melanie,,Spitzner	melanie.spitzner@med.uni-goettingen.de	+49 (0) 551 - 39 10478	Department of General and Visceral Surgery	Georg-August-University Goettingen	Robert-Koch-Str. 40	Goettingen	37075	Germany	ftp://ftp.ncbi.nlm.nih.gov/geo/samples/GSM508nnn/GSM508842/suppl/GSM508842_Grade2_251485050786_S01_GE1-v5_95_Feb07_1_3.txt.gz	45015	SW403	L-15	2	0.757895
GSM508843	sw1463.l15.1	GSM508843	Public on Feb 10 2011	Feb 12 2010	Feb 10 2011	RNA	1	colorectal cancer cell line	Homo sapiens	cell line: SW1463	medium: L-15	sf2: 0.559139784946237	rep: 1	No treatment prior to expression profiling analysis.	Twelve human colorectal cancer cell lines were obtained from the American Type Culture Collection (ATCC, Manassas, VA): Caco-2, HT-29, LS411N, LS513, LS1034, SW403, SW480, SW620, SW837, SW1116, SW1463, and WiDr. All lines were cultured in their recommended medium (Invitrogen, Karlsruhe, Germany), supplemented with fetal bovine serum (Pan, Aidenbach, Germany) and 2mM L-glutamine (BioWhittaker, Ver…	total RNA	Total RNA was isolated using the RNeasy Mini kit (Qiagen, Hilden, Germany) according to the manufacturer's instructions, including a DNase treatment step. Nucleic acid quantity, quality and purity were determined using NanoDrop ND-1000 spectrophotometer (Peqlab, Erlangen, Germany) and a 2100 Bioanalyzer (Agilent Technologies, Palo Alto, CA). Only RNA samples with a RNA integrity number > 9.5 were…	Cy3	800 ng of total RNA were reverse-transcribed, amplified and labeled with Cy3 using the Low RNA Input Linear Amplification Kit, PLUS (Agilent Technologies). After purification, the cRNA yield and integration of cyanine 3-CTP was measured using a spectrophotometer. cRNA with a specific activity > 9.0 pmol/碌g was excluded from further experiments.	9606	Subsequently, 1.65 碌g of labeled cRNA per sample was fragmentized and hybridized overnight to a 4x44k gene expression microarray (Agilent Technologies). After a washing step the arrays were scanned on an Agilent DNA microarray scanner G2505B (Agilent Technologies) at 5 micron resolution. Scanned image files were visually inspected for artifacts and subsequently analyzed.	Agilent DNA microarray scanner G2505B, 5 micron resolution	Cell line: SW1463; Medium: L-15; SF2: 0.56	Median signal intensities from the Feature Extraction Software were converted to log2 and quantile normalized using the R package 鈥渓imma鈥?	GPL4133	Melanie,,Spitzner	melanie.spitzner@med.uni-goettingen.de	+49 (0) 551 - 39 10478	Department of General and Visceral Surgery	Georg-August-University Goettingen	Robert-Koch-Str. 40	Goettingen	37075	Germany	ftp://ftp.ncbi.nlm.nih.gov/geo/samples/GSM508nnn/GSM508843/suppl/GSM508843_Grade2_251485050786_S01_GE1-v5_95_Feb07_1_4.txt.gz	45015	SW1463	L-15	1	0.55914
GSM508844	ls513.rpmi.2	GSM508844	Public on Feb 10 2011	Feb 12 2010	Feb 10 2011	RNA	1	colorectal cancer cell line	Homo sapiens	cell line: LS513	medium: RPMI	sf2: 0.593457943925234	rep: 2	No treatment prior to expression profiling analysis.	Twelve human colorectal cancer cell lines were obtained from the American Type Culture Collection (ATCC, Manassas, VA): Caco-2, HT-29, LS411N, LS513, LS1034, SW403, SW480, SW620, SW837, SW1116, SW1463, and WiDr. All lines were cultured in their recommended medium (Invitrogen, Karlsruhe, Germany), supplemented with fetal bovine serum (Pan, Aidenbach, Germany) and 2mM L-glutamine (BioWhittaker, Ver…	total RNA	Total RNA was isolated using the RNeasy Mini kit (Qiagen, Hilden, Germany) according to the manufacturer's instructions, including a DNase treatment step. Nucleic acid quantity, quality and purity were determined using NanoDrop ND-1000 spectrophotometer (Peqlab, Erlangen, Germany) and a 2100 Bioanalyzer (Agilent Technologies, Palo Alto, CA). Only RNA samples with a RNA integrity number > 9.5 were…	Cy3	800 ng of total RNA were reverse-transcribed, amplified and labeled with Cy3 using the Low RNA Input Linear Amplification Kit, PLUS (Agilent Technologies). After purification, the cRNA yield and integration of cyanine 3-CTP was measured using a spectrophotometer. cRNA with a specific activity > 9.0 pmol/碌g was excluded from further experiments.	9606	Subsequently, 1.65 碌g of labeled cRNA per sample was fragmentized and hybridized overnight to a 4x44k gene expression microarray (Agilent Technologies). After a washing step the arrays were scanned on an Agilent DNA microarray scanner G2505B (Agilent Technologies) at 5 micron resolution. Scanned image files were visually inspected for artifacts and subsequently analyzed.	Agilent DNA microarray scanner G2505B, 5 micron resolution	Cell line: LS513; Medium: RPMI; SF2: 0.59	Median signal intensities from the Feature Extraction Software were converted to log2 and quantile normalized using the R package 鈥渓imma鈥?	GPL4133	Melanie,,Spitzner	melanie.spitzner@med.uni-goettingen.de	+49 (0) 551 - 39 10478	Department of General and Visceral Surgery	Georg-August-University Goettingen	Robert-Koch-Str. 40	Goettingen	37075	Germany	ftp://ftp.ncbi.nlm.nih.gov/geo/samples/GSM508nnn/GSM508844/suppl/GSM508844_Grade2_251485050787_S01_GE1-v5_95_Feb07_1_1.txt.gz	45015	LS513	RPMI	2	0.593458
GSM508845	sw480.rpmi.2	GSM508845	Public on Feb 10 2011	Feb 12 2010	Feb 10 2011	RNA	1	colorectal cancer cell line	Homo sapiens	cell line: SW480	medium: RPMI	sf2: NA	rep: 2	No treatment prior to expression profiling analysis.	Twelve human colorectal cancer cell lines were obtained from the American Type Culture Collection (ATCC, Manassas, VA): Caco-2, HT-29, LS411N, LS513, LS1034, SW403, SW480, SW620, SW837, SW1116, SW1463, and WiDr. All lines were cultured in their recommended medium (Invitrogen, Karlsruhe, Germany), supplemented with fetal bovine serum (Pan, Aidenbach, Germany) and 2mM L-glutamine (BioWhittaker, Ver…	total RNA	Total RNA was isolated using the RNeasy Mini kit (Qiagen, Hilden, Germany) according to the manufacturer's instructions, including a DNase treatment step. Nucleic acid quantity, quality and purity were determined using NanoDrop ND-1000 spectrophotometer (Peqlab, Erlangen, Germany) and a 2100 Bioanalyzer (Agilent Technologies, Palo Alto, CA). Only RNA samples with a RNA integrity number > 9.5 were…	Cy3	800 ng of total RNA were reverse-transcribed, amplified and labeled with Cy3 using the Low RNA Input Linear Amplification Kit, PLUS (Agilent Technologies). After purification, the cRNA yield and integration of cyanine 3-CTP was measured using a spectrophotometer. cRNA with a specific activity > 9.0 pmol/碌g was excluded from further experiments.	9606	Subsequently, 1.65 碌g of labeled cRNA per sample was fragmentized and hybridized overnight to a 4x44k gene expression microarray (Agilent Technologies). After a washing step the arrays were scanned on an Agilent DNA microarray scanner G2505B (Agilent Technologies) at 5 micron resolution. Scanned image files were visually inspected for artifacts and subsequently analyzed.	Agilent DNA microarray scanner G2505B, 5 micron resolution	Cell line: SW480; Medium: RPMI	Median signal intensities from the Feature Extraction Software were converted to log2 and quantile normalized using the R package 鈥渓imma鈥?	GPL4133	Melanie,,Spitzner	melanie.spitzner@med.uni-goettingen.de	+49 (0) 551 - 39 10478	Department of General and Visceral Surgery	Georg-August-University Goettingen	Robert-Koch-Str. 40	Goettingen	37075	Germany	ftp://ftp.ncbi.nlm.nih.gov/geo/samples/GSM508nnn/GSM508845/suppl/GSM508845_Grade2_251485050787_S01_GE1-v5_95_Feb07_1_2.txt.gz	45015	SW480	RPMI	2	NA
GSM508846	sw480.l15.1	GSM508846	Public on Feb 10 2011	Feb 12 2010	Feb 10 2011	RNA	1	colorectal cancer cell line	Homo sapiens	cell line: SW480	medium: L-15	sf2: 0.552884615384615	rep: 1	No treatment prior to expression profiling analysis.	Twelve human colorectal cancer cell lines were obtained from the American Type Culture Collection (ATCC, Manassas, VA): Caco-2, HT-29, LS411N, LS513, LS1034, SW403, SW480, SW620, SW837, SW1116, SW1463, and WiDr. All lines were cultured in their recommended medium (Invitrogen, Karlsruhe, Germany), supplemented with fetal bovine serum (Pan, Aidenbach, Germany) and 2mM L-glutamine (BioWhittaker, Ver…	total RNA	Total RNA was isolated using the RNeasy Mini kit (Qiagen, Hilden, Germany) according to the manufacturer's instructions, including a DNase treatment step. Nucleic acid quantity, quality and purity were determined using NanoDrop ND-1000 spectrophotometer (Peqlab, Erlangen, Germany) and a 2100 Bioanalyzer (Agilent Technologies, Palo Alto, CA). Only RNA samples with a RNA integrity number > 9.5 were…	Cy3	800 ng of total RNA were reverse-transcribed, amplified and labeled with Cy3 using the Low RNA Input Linear Amplification Kit, PLUS (Agilent Technologies). After purification, the cRNA yield and integration of cyanine 3-CTP was measured using a spectrophotometer. cRNA with a specific activity > 9.0 pmol/碌g was excluded from further experiments.	9606	Subsequently, 1.65 碌g of labeled cRNA per sample was fragmentized and hybridized overnight to a 4x44k gene expression microarray (Agilent Technologies). After a washing step the arrays were scanned on an Agilent DNA microarray scanner G2505B (Agilent Technologies) at 5 micron resolution. Scanned image files were visually inspected for artifacts and subsequently analyzed.	Agilent DNA microarray scanner G2505B, 5 micron resolution	Cell line: SW480; Medium: L-15; SF2: 0.55	Median signal intensities from the Feature Extraction Software were converted to log2 and quantile normalized using the R package 鈥渓imma鈥?	GPL4133	Melanie,,Spitzner	melanie.spitzner@med.uni-goettingen.de	+49 (0) 551 - 39 10478	Department of General and Visceral Surgery	Georg-August-University Goettingen	Robert-Koch-Str. 40	Goettingen	37075	Germany	ftp://ftp.ncbi.nlm.nih.gov/geo/samples/GSM508nnn/GSM508846/suppl/GSM508846_Grade2_251485050787_S01_GE1-v5_95_Feb07_1_3.txt.gz	45015	SW480	L-15	1	0.552885
GSM508847	sw837.rpmi.3	GSM508847	Public on Feb 10 2011	Feb 12 2010	Feb 10 2011	RNA	1	colorectal cancer cell line	Homo sapiens	cell line: SW837	medium: RPMI	sf2: NA	rep: 3	No treatment prior to expression profiling analysis.	Twelve human colorectal cancer cell lines were obtained from the American Type Culture Collection (ATCC, Manassas, VA): Caco-2, HT-29, LS411N, LS513, LS1034, SW403, SW480, SW620, SW837, SW1116, SW1463, and WiDr. All lines were cultured in their recommended medium (Invitrogen, Karlsruhe, Germany), supplemented with fetal bovine serum (Pan, Aidenbach, Germany) and 2mM L-glutamine (BioWhittaker, Ver…	total RNA	Total RNA was isolated using the RNeasy Mini kit (Qiagen, Hilden, Germany) according to the manufacturer's instructions, including a DNase treatment step. Nucleic acid quantity, quality and purity were determined using NanoDrop ND-1000 spectrophotometer (Peqlab, Erlangen, Germany) and a 2100 Bioanalyzer (Agilent Technologies, Palo Alto, CA). Only RNA samples with a RNA integrity number > 9.5 were…	Cy3	800 ng of total RNA were reverse-transcribed, amplified and labeled with Cy3 using the Low RNA Input Linear Amplification Kit, PLUS (Agilent Technologies). After purification, the cRNA yield and integration of cyanine 3-CTP was measured using a spectrophotometer. cRNA with a specific activity > 9.0 pmol/碌g was excluded from further experiments.	9606	Subsequently, 1.65 碌g of labeled cRNA per sample was fragmentized and hybridized overnight to a 4x44k gene expression microarray (Agilent Technologies). After a washing step the arrays were scanned on an Agilent DNA microarray scanner G2505B (Agilent Technologies) at 5 micron resolution. Scanned image files were visually inspected for artifacts and subsequently analyzed.	Agilent DNA microarray scanner G2505B, 5 micron resolution	Cell line: SW837; Medium: RPMI	Median signal intensities from the Feature Extraction Software were converted to log2 and quantile normalized using the R package 鈥渓imma鈥?	GPL4133	Melanie,,Spitzner	melanie.spitzner@med.uni-goettingen.de	+49 (0) 551 - 39 10478	Department of General and Visceral Surgery	Georg-August-University Goettingen	Robert-Koch-Str. 40	Goettingen	37075	Germany	ftp://ftp.ncbi.nlm.nih.gov/geo/samples/GSM508nnn/GSM508847/suppl/GSM508847_Grade2_251485050787_S01_GE1-v5_95_Feb07_1_4.txt.gz	45015	SW837	RPMI	3	NA
GSM508848	ls513.rpmi.3	GSM508848	Public on Feb 10 2011	Feb 12 2010	Feb 10 2011	RNA	1	colorectal cancer cell line	Homo sapiens	cell line: LS513	medium: RPMI	sf2: 0.593457943925234	rep: 3	No treatment prior to expression profiling analysis.	Twelve human colorectal cancer cell lines were obtained from the American Type Culture Collection (ATCC, Manassas, VA): Caco-2, HT-29, LS411N, LS513, LS1034, SW403, SW480, SW620, SW837, SW1116, SW1463, and WiDr. All lines were cultured in their recommended medium (Invitrogen, Karlsruhe, Germany), supplemented with fetal bovine serum (Pan, Aidenbach, Germany) and 2mM L-glutamine (BioWhittaker, Ver…	total RNA	Total RNA was isolated using the RNeasy Mini kit (Qiagen, Hilden, Germany) according to the manufacturer's instructions, including a DNase treatment step. Nucleic acid quantity, quality and purity were determined using NanoDrop ND-1000 spectrophotometer (Peqlab, Erlangen, Germany) and a 2100 Bioanalyzer (Agilent Technologies, Palo Alto, CA). Only RNA samples with a RNA integrity number > 9.5 were…	Cy3	800 ng of total RNA were reverse-transcribed, amplified and labeled with Cy3 using the Low RNA Input Linear Amplification Kit, PLUS (Agilent Technologies). After purification, the cRNA yield and integration of cyanine 3-CTP was measured using a spectrophotometer. cRNA with a specific activity > 9.0 pmol/碌g was excluded from further experiments.	9606	Subsequently, 1.65 碌g of labeled cRNA per sample was fragmentized and hybridized overnight to a 4x44k gene expression microarray (Agilent Technologies). After a washing step the arrays were scanned on an Agilent DNA microarray scanner G2505B (Agilent Technologies) at 5 micron resolution. Scanned image files were visually inspected for artifacts and subsequently analyzed.	Agilent DNA microarray scanner G2505B, 5 micron resolution	Cell line: LS513; Medium: RPMI; SF2: 0.59	Median signal intensities from the Feature Extraction Software were converted to log2 and quantile normalized using the R package 鈥渓imma鈥?	GPL4133	Melanie,,Spitzner	melanie.spitzner@med.uni-goettingen.de	+49 (0) 551 - 39 10478	Department of General and Visceral Surgery	Georg-August-University Goettingen	Robert-Koch-Str. 40	Goettingen	37075	Germany	ftp://ftp.ncbi.nlm.nih.gov/geo/samples/GSM508nnn/GSM508848/suppl/GSM508848_Grade2_251485050788_S01_GE1-v5_95_Feb07_1_1.txt.gz	45015	LS513	RPMI	3	0.593458
GSM508849	ls1034.rpmi.2	GSM508849	Public on Feb 10 2011	Feb 12 2010	Feb 10 2011	RNA	1	colorectal cancer cell line	Homo sapiens	cell line: LS1034	medium: RPMI	sf2: 0.585743801652893	rep: 2	No treatment prior to expression profiling analysis.	Twelve human colorectal cancer cell lines were obtained from the American Type Culture Collection (ATCC, Manassas, VA): Caco-2, HT-29, LS411N, LS513, LS1034, SW403, SW480, SW620, SW837, SW1116, SW1463, and WiDr. All lines were cultured in their recommended medium (Invitrogen, Karlsruhe, Germany), supplemented with fetal bovine serum (Pan, Aidenbach, Germany) and 2mM L-glutamine (BioWhittaker, Ver…	total RNA	Total RNA was isolated using the RNeasy Mini kit (Qiagen, Hilden, Germany) according to the manufacturer's instructions, including a DNase treatment step. Nucleic acid quantity, quality and purity were determined using NanoDrop ND-1000 spectrophotometer (Peqlab, Erlangen, Germany) and a 2100 Bioanalyzer (Agilent Technologies, Palo Alto, CA). Only RNA samples with a RNA integrity number > 9.5 were…	Cy3	800 ng of total RNA were reverse-transcribed, amplified and labeled with Cy3 using the Low RNA Input Linear Amplification Kit, PLUS (Agilent Technologies). After purification, the cRNA yield and integration of cyanine 3-CTP was measured using a spectrophotometer. cRNA with a specific activity > 9.0 pmol/碌g was excluded from further experiments.	9606	Subsequently, 1.65 碌g of labeled cRNA per sample was fragmentized and hybridized overnight to a 4x44k gene expression microarray (Agilent Technologies). After a washing step the arrays were scanned on an Agilent DNA microarray scanner G2505B (Agilent Technologies) at 5 micron resolution. Scanned image files were visually inspected for artifacts and subsequently analyzed.	Agilent DNA microarray scanner G2505B, 5 micron resolution	Cell line: LS1034; Medium: RPMI; SF2: 0.59	Median signal intensities from the Feature Extraction Software were converted to log2 and quantile normalized using the R package 鈥渓imma鈥?	GPL4133	Melanie,,Spitzner	melanie.spitzner@med.uni-goettingen.de	+49 (0) 551 - 39 10478	Department of General and Visceral Surgery	Georg-August-University Goettingen	Robert-Koch-Str. 40	Goettingen	37075	Germany	ftp://ftp.ncbi.nlm.nih.gov/geo/samples/GSM508nnn/GSM508849/suppl/GSM508849_Grade2_251485050788_S01_GE1-v5_95_Feb07_1_2.txt.gz	45015	LS1034	RPMI	2	0.585744
GSM508850	sw620.l15.2	GSM508850	Public on Feb 10 2011	Feb 12 2010	Feb 10 2011	RNA	1	colorectal cancer cell line	Homo sapiens	cell line: SW620	medium: L-15	sf2: 0.459016393442623	rep: 2	No treatment prior to expression profiling analysis.	Twelve human colorectal cancer cell lines were obtained from the American Type Culture Collection (ATCC, Manassas, VA): Caco-2, HT-29, LS411N, LS513, LS1034, SW403, SW480, SW620, SW837, SW1116, SW1463, and WiDr. All lines were cultured in their recommended medium (Invitrogen, Karlsruhe, Germany), supplemented with fetal bovine serum (Pan, Aidenbach, Germany) and 2mM L-glutamine (BioWhittaker, Ver…	total RNA	Total RNA was isolated using the RNeasy Mini kit (Qiagen, Hilden, Germany) according to the manufacturer's instructions, including a DNase treatment step. Nucleic acid quantity, quality and purity were determined using NanoDrop ND-1000 spectrophotometer (Peqlab, Erlangen, Germany) and a 2100 Bioanalyzer (Agilent Technologies, Palo Alto, CA). Only RNA samples with a RNA integrity number > 9.5 were…	Cy3	800 ng of total RNA were reverse-transcribed, amplified and labeled with Cy3 using the Low RNA Input Linear Amplification Kit, PLUS (Agilent Technologies). After purification, the cRNA yield and integration of cyanine 3-CTP was measured using a spectrophotometer. cRNA with a specific activity > 9.0 pmol/碌g was excluded from further experiments.	9606	Subsequently, 1.65 碌g of labeled cRNA per sample was fragmentized and hybridized overnight to a 4x44k gene expression microarray (Agilent Technologies). After a washing step the arrays were scanned on an Agilent DNA microarray scanner G2505B (Agilent Technologies) at 5 micron resolution. Scanned image files were visually inspected for artifacts and subsequently analyzed.	Agilent DNA microarray scanner G2505B, 5 micron resolution	Cell line: SW620; Medium: L-15; SF2: 0.46	Median signal intensities from the Feature Extraction Software were converted to log2 and quantile normalized using the R package 鈥渓imma鈥?	GPL4133	Melanie,,Spitzner	melanie.spitzner@med.uni-goettingen.de	+49 (0) 551 - 39 10478	Department of General and Visceral Surgery	Georg-August-University Goettingen	Robert-Koch-Str. 40	Goettingen	37075	Germany	ftp://ftp.ncbi.nlm.nih.gov/geo/samples/GSM508nnn/GSM508850/suppl/GSM508850_Grade2_251485050788_S01_GE1-v5_95_Feb07_1_4.txt.gz	45015	SW620	L-15	2	0.459016
GSM508851	sw837.rpmi.2	GSM508851	Public on Feb 10 2011	Feb 12 2010	Feb 10 2011	RNA	1	colorectal cancer cell line	Homo sapiens	cell line: SW837	medium: RPMI	sf2: NA	rep: 2	No treatment prior to expression profiling analysis.	Twelve human colorectal cancer cell lines were obtained from the American Type Culture Collection (ATCC, Manassas, VA): Caco-2, HT-29, LS411N, LS513, LS1034, SW403, SW480, SW620, SW837, SW1116, SW1463, and WiDr. All lines were cultured in their recommended medium (Invitrogen, Karlsruhe, Germany), supplemented with fetal bovine serum (Pan, Aidenbach, Germany) and 2mM L-glutamine (BioWhittaker, Ver…	total RNA	Total RNA was isolated using the RNeasy Mini kit (Qiagen, Hilden, Germany) according to the manufacturer's instructions, including a DNase treatment step. Nucleic acid quantity, quality and purity were determined using NanoDrop ND-1000 spectrophotometer (Peqlab, Erlangen, Germany) and a 2100 Bioanalyzer (Agilent Technologies, Palo Alto, CA). Only RNA samples with a RNA integrity number > 9.5 were…	Cy3	800 ng of total RNA were reverse-transcribed, amplified and labeled with Cy3 using the Low RNA Input Linear Amplification Kit, PLUS (Agilent Technologies). After purification, the cRNA yield and integration of cyanine 3-CTP was measured using a spectrophotometer. cRNA with a specific activity > 9.0 pmol/碌g was excluded from further experiments.	9606	Subsequently, 1.65 碌g of labeled cRNA per sample was fragmentized and hybridized overnight to a 4x44k gene expression microarray (Agilent Technologies). After a washing step the arrays were scanned on an Agilent DNA microarray scanner G2505B (Agilent Technologies) at 5 micron resolution. Scanned image files were visually inspected for artifacts and subsequently analyzed.	Agilent DNA microarray scanner G2505B, 5 micron resolution	Cell line: SW837; Medium: RPMI	Median signal intensities from the Feature Extraction Software were converted to log2 and quantile normalized using the R package 鈥渓imma鈥?	GPL4133	Melanie,,Spitzner	melanie.spitzner@med.uni-goettingen.de	+49 (0) 551 - 39 10478	Department of General and Visceral Surgery	Georg-August-University Goettingen	Robert-Koch-Str. 40	Goettingen	37075	Germany	ftp://ftp.ncbi.nlm.nih.gov/geo/samples/GSM508nnn/GSM508851/suppl/GSM508851_Grade2_251485050788_S01_GE1-v5_95_Feb07_1_3.txt.gz	45015	SW837	RPMI	2	NA
GSM508852	sw1463.l15.2	GSM508852	Public on Feb 10 2011	Feb 12 2010	Feb 10 2011	RNA	1	colorectal cancer cell line	Homo sapiens	cell line: SW1463	medium: L-15	sf2: 0.559139784946237	rep: 2	No treatment prior to expression profiling analysis.	Twelve human colorectal cancer cell lines were obtained from the American Type Culture Collection (ATCC, Manassas, VA): Caco-2, HT-29, LS411N, LS513, LS1034, SW403, SW480, SW620, SW837, SW1116, SW1463, and WiDr. All lines were cultured in their recommended medium (Invitrogen, Karlsruhe, Germany), supplemented with fetal bovine serum (Pan, Aidenbach, Germany) and 2mM L-glutamine (BioWhittaker, Ver…	total RNA	Total RNA was isolated using the RNeasy Mini kit (Qiagen, Hilden, Germany) according to the manufacturer's instructions, including a DNase treatment step. Nucleic acid quantity, quality and purity were determined using NanoDrop ND-1000 spectrophotometer (Peqlab, Erlangen, Germany) and a 2100 Bioanalyzer (Agilent Technologies, Palo Alto, CA). Only RNA samples with a RNA integrity number > 9.5 were…	Cy3	800 ng of total RNA were reverse-transcribed, amplified and labeled with Cy3 using the Low RNA Input Linear Amplification Kit, PLUS (Agilent Technologies). After purification, the cRNA yield and integration of cyanine 3-CTP was measured using a spectrophotometer. cRNA with a specific activity > 9.0 pmol/碌g was excluded from further experiments.	9606	Subsequently, 1.65 碌g of labeled cRNA per sample was fragmentized and hybridized overnight to a 4x44k gene expression microarray (Agilent Technologies). After a washing step the arrays were scanned on an Agilent DNA microarray scanner G2505B (Agilent Technologies) at 5 micron resolution. Scanned image files were visually inspected for artifacts and subsequently analyzed.	Agilent DNA microarray scanner G2505B, 5 micron resolution	Cell line: SW1463; Medium: L-15; SF2: 0.56	Median signal intensities from the Feature Extraction Software were converted to log2 and quantile normalized using the R package 鈥渓imma鈥?	GPL4133	Melanie,,Spitzner	melanie.spitzner@med.uni-goettingen.de	+49 (0) 551 - 39 10478	Department of General and Visceral Surgery	Georg-August-University Goettingen	Robert-Koch-Str. 40	Goettingen	37075	Germany	ftp://ftp.ncbi.nlm.nih.gov/geo/samples/GSM508nnn/GSM508852/suppl/GSM508852_Grade2_251485050789_S01_GE1-v5_95_Feb07_1_1.txt.gz	45015	SW1463	L-15	2	0.55914
GSM508853	caco2.mem.2	GSM508853	Public on Feb 10 2011	Feb 12 2010	Feb 10 2011	RNA	1	colorectal cancer cell line	Homo sapiens	cell line: Caco-2	medium: MEM	sf2: 0.583333333333333	rep: 2	No treatment prior to expression profiling analysis.	Twelve human colorectal cancer cell lines were obtained from the American Type Culture Collection (ATCC, Manassas, VA): Caco-2, HT-29, LS411N, LS513, LS1034, SW403, SW480, SW620, SW837, SW1116, SW1463, and WiDr. All lines were cultured in their recommended medium (Invitrogen, Karlsruhe, Germany), supplemented with fetal bovine serum (Pan, Aidenbach, Germany) and 2mM L-glutamine (BioWhittaker, Ver…	total RNA	Total RNA was isolated using the RNeasy Mini kit (Qiagen, Hilden, Germany) according to the manufacturer's instructions, including a DNase treatment step. Nucleic acid quantity, quality and purity were determined using NanoDrop ND-1000 spectrophotometer (Peqlab, Erlangen, Germany) and a 2100 Bioanalyzer (Agilent Technologies, Palo Alto, CA). Only RNA samples with a RNA integrity number > 9.5 were…	Cy3	800 ng of total RNA were reverse-transcribed, amplified and labeled with Cy3 using the Low RNA Input Linear Amplification Kit, PLUS (Agilent Technologies). After purification, the cRNA yield and integration of cyanine 3-CTP was measured using a spectrophotometer. cRNA with a specific activity > 9.0 pmol/碌g was excluded from further experiments.	9606	Subsequently, 1.65 碌g of labeled cRNA per sample was fragmentized and hybridized overnight to a 4x44k gene expression microarray (Agilent Technologies). After a washing step the arrays were scanned on an Agilent DNA microarray scanner G2505B (Agilent Technologies) at 5 micron resolution. Scanned image files were visually inspected for artifacts and subsequently analyzed.	Agilent DNA microarray scanner G2505B, 5 micron resolution	Cell line: Caco-2; Medium: MEM; SF2: 0.58	Median signal intensities from the Feature Extraction Software were converted to log2 and quantile normalized using the R package 鈥渓imma鈥?	GPL4133	Melanie,,Spitzner	melanie.spitzner@med.uni-goettingen.de	+49 (0) 551 - 39 10478	Department of General and Visceral Surgery	Georg-August-University Goettingen	Robert-Koch-Str. 40	Goettingen	37075	Germany	ftp://ftp.ncbi.nlm.nih.gov/geo/samples/GSM508nnn/GSM508853/suppl/GSM508853_Grade2_251485050789_S01_GE1-v5_95_Feb07_1_2.txt.gz	45015	Caco-2	MEM	2	0.583333
GSM508854	sw480.rpmi.1	GSM508854	Public on Feb 10 2011	Feb 12 2010	Feb 10 2011	RNA	1	colorectal cancer cell line	Homo sapiens	cell line: SW480	medium: RPMI	sf2: NA	rep: 1	No treatment prior to expression profiling analysis.	Twelve human colorectal cancer cell lines were obtained from the American Type Culture Collection (ATCC, Manassas, VA): Caco-2, HT-29, LS411N, LS513, LS1034, SW403, SW480, SW620, SW837, SW1116, SW1463, and WiDr. All lines were cultured in their recommended medium (Invitrogen, Karlsruhe, Germany), supplemented with fetal bovine serum (Pan, Aidenbach, Germany) and 2mM L-glutamine (BioWhittaker, Ver…	total RNA	Total RNA was isolated using the RNeasy Mini kit (Qiagen, Hilden, Germany) according to the manufacturer's instructions, including a DNase treatment step. Nucleic acid quantity, quality and purity were determined using NanoDrop ND-1000 spectrophotometer (Peqlab, Erlangen, Germany) and a 2100 Bioanalyzer (Agilent Technologies, Palo Alto, CA). Only RNA samples with a RNA integrity number > 9.5 were…	Cy3	800 ng of total RNA were reverse-transcribed, amplified and labeled with Cy3 using the Low RNA Input Linear Amplification Kit, PLUS (Agilent Technologies). After purification, the cRNA yield and integration of cyanine 3-CTP was measured using a spectrophotometer. cRNA with a specific activity > 9.0 pmol/碌g was excluded from further experiments.	9606	Subsequently, 1.65 碌g of labeled cRNA per sample was fragmentized and hybridized overnight to a 4x44k gene expression microarray (Agilent Technologies). After a washing step the arrays were scanned on an Agilent DNA microarray scanner G2505B (Agilent Technologies) at 5 micron resolution. Scanned image files were visually inspected for artifacts and subsequently analyzed.	Agilent DNA microarray scanner G2505B, 5 micron resolution	Cell line: SW480; Medium: RPMI	Median signal intensities from the Feature Extraction Software were converted to log2 and quantile normalized using the R package 鈥渓imma鈥?	GPL4133	Melanie,,Spitzner	melanie.spitzner@med.uni-goettingen.de	+49 (0) 551 - 39 10478	Department of General and Visceral Surgery	Georg-August-University Goettingen	Robert-Koch-Str. 40	Goettingen	37075	Germany	ftp://ftp.ncbi.nlm.nih.gov/geo/samples/GSM508nnn/GSM508854/suppl/GSM508854_Grade2_251485050789_S01_GE1-v5_95_Feb07_1_3.txt.gz	45015	SW480	RPMI	1	NA
GSM508855	sw480.l15.2	GSM508855	Public on Feb 10 2011	Feb 12 2010	Feb 10 2011	RNA	1	colorectal cancer cell line	Homo sapiens	cell line: SW480	medium: L-15	sf2: 0.552884615384615	rep: 2	No treatment prior to expression profiling analysis.	Twelve human colorectal cancer cell lines were obtained from the American Type Culture Collection (ATCC, Manassas, VA): Caco-2, HT-29, LS411N, LS513, LS1034, SW403, SW480, SW620, SW837, SW1116, SW1463, and WiDr. All lines were cultured in their recommended medium (Invitrogen, Karlsruhe, Germany), supplemented with fetal bovine serum (Pan, Aidenbach, Germany) and 2mM L-glutamine (BioWhittaker, Ver…	total RNA	Total RNA was isolated using the RNeasy Mini kit (Qiagen, Hilden, Germany) according to the manufacturer's instructions, including a DNase treatment step. Nucleic acid quantity, quality and purity were determined using NanoDrop ND-1000 spectrophotometer (Peqlab, Erlangen, Germany) and a 2100 Bioanalyzer (Agilent Technologies, Palo Alto, CA). Only RNA samples with a RNA integrity number > 9.5 were…	Cy3	800 ng of total RNA were reverse-transcribed, amplified and labeled with Cy3 using the Low RNA Input Linear Amplification Kit, PLUS (Agilent Technologies). After purification, the cRNA yield and integration of cyanine 3-CTP was measured using a spectrophotometer. cRNA with a specific activity > 9.0 pmol/碌g was excluded from further experiments.	9606	Subsequently, 1.65 碌g of labeled cRNA per sample was fragmentized and hybridized overnight to a 4x44k gene expression microarray (Agilent Technologies). After a washing step the arrays were scanned on an Agilent DNA microarray scanner G2505B (Agilent Technologies) at 5 micron resolution. Scanned image files were visually inspected for artifacts and subsequently analyzed.	Agilent DNA microarray scanner G2505B, 5 micron resolution	Cell line: SW480; Medium: L-15; SF2: 0.55	Median signal intensities from the Feature Extraction Software were converted to log2 and quantile normalized using the R package 鈥渓imma鈥?	GPL4133	Melanie,,Spitzner	melanie.spitzner@med.uni-goettingen.de	+49 (0) 551 - 39 10478	Department of General and Visceral Surgery	Georg-August-University Goettingen	Robert-Koch-Str. 40	Goettingen	37075	Germany	ftp://ftp.ncbi.nlm.nih.gov/geo/samples/GSM508nnn/GSM508855/suppl/GSM508855_Grade2_251485050789_S01_GE1-v5_95_Feb07_1_4.txt.gz	45015	SW480	L-15	2	0.552885
GSM508856	sw403.l15.1	GSM508856	Public on Feb 10 2011	Feb 12 2010	Feb 10 2011	RNA	1	colorectal cancer cell line	Homo sapiens	cell line: SW403	medium: L-15	sf2: 0.757894736842105	rep: 1	No treatment prior to expression profiling analysis.	Twelve human colorectal cancer cell lines were obtained from the American Type Culture Collection (ATCC, Manassas, VA): Caco-2, HT-29, LS411N, LS513, LS1034, SW403, SW480, SW620, SW837, SW1116, SW1463, and WiDr. All lines were cultured in their recommended medium (Invitrogen, Karlsruhe, Germany), supplemented with fetal bovine serum (Pan, Aidenbach, Germany) and 2mM L-glutamine (BioWhittaker, Ver…	total RNA	Total RNA was isolated using the RNeasy Mini kit (Qiagen, Hilden, Germany) according to the manufacturer's instructions, including a DNase treatment step. Nucleic acid quantity, quality and purity were determined using NanoDrop ND-1000 spectrophotometer (Peqlab, Erlangen, Germany) and a 2100 Bioanalyzer (Agilent Technologies, Palo Alto, CA). Only RNA samples with a RNA integrity number > 9.5 were…	Cy3	800 ng of total RNA were reverse-transcribed, amplified and labeled with Cy3 using the Low RNA Input Linear Amplification Kit, PLUS (Agilent Technologies). After purification, the cRNA yield and integration of cyanine 3-CTP was measured using a spectrophotometer. cRNA with a specific activity > 9.0 pmol/碌g was excluded from further experiments.	9606	Subsequently, 1.65 碌g of labeled cRNA per sample was fragmentized and hybridized overnight to a 4x44k gene expression microarray (Agilent Technologies). After a washing step the arrays were scanned on an Agilent DNA microarray scanner G2505B (Agilent Technologies) at 5 micron resolution. Scanned image files were visually inspected for artifacts and subsequently analyzed.	Agilent DNA microarray scanner G2505B, 5 micron resolution	Cell line: SW403; Medium: L-15; SF2: 0.76	Median signal intensities from the Feature Extraction Software were converted to log2 and quantile normalized using the R package 鈥渓imma鈥?	GPL4133	Melanie,,Spitzner	melanie.spitzner@med.uni-goettingen.de	+49 (0) 551 - 39 10478	Department of General and Visceral Surgery	Georg-August-University Goettingen	Robert-Koch-Str. 40	Goettingen	37075	Germany	ftp://ftp.ncbi.nlm.nih.gov/geo/samples/GSM508nnn/GSM508856/suppl/GSM508856_Grade2_251485050790_S01_GE1-v5_95_Feb07_1_1.txt.gz	45015	SW403	L-15	1	0.757895
GSM508857	ls411n.rpmi.3	GSM508857	Public on Feb 10 2011	Feb 12 2010	Feb 10 2011	RNA	1	colorectal cancer cell line	Homo sapiens	cell line: LS411N	medium: RPMI	sf2: 0.28287841191067	rep: 3	No treatment prior to expression profiling analysis.	Twelve human colorectal cancer cell lines were obtained from the American Type Culture Collection (ATCC, Manassas, VA): Caco-2, HT-29, LS411N, LS513, LS1034, SW403, SW480, SW620, SW837, SW1116, SW1463, and WiDr. All lines were cultured in their recommended medium (Invitrogen, Karlsruhe, Germany), supplemented with fetal bovine serum (Pan, Aidenbach, Germany) and 2mM L-glutamine (BioWhittaker, Ver…	total RNA	Total RNA was isolated using the RNeasy Mini kit (Qiagen, Hilden, Germany) according to the manufacturer's instructions, including a DNase treatment step. Nucleic acid quantity, quality and purity were determined using NanoDrop ND-1000 spectrophotometer (Peqlab, Erlangen, Germany) and a 2100 Bioanalyzer (Agilent Technologies, Palo Alto, CA). Only RNA samples with a RNA integrity number > 9.5 were…	Cy3	800 ng of total RNA were reverse-transcribed, amplified and labeled with Cy3 using the Low RNA Input Linear Amplification Kit, PLUS (Agilent Technologies). After purification, the cRNA yield and integration of cyanine 3-CTP was measured using a spectrophotometer. cRNA with a specific activity > 9.0 pmol/碌g was excluded from further experiments.	9606	Subsequently, 1.65 碌g of labeled cRNA per sample was fragmentized and hybridized overnight to a 4x44k gene expression microarray (Agilent Technologies). After a washing step the arrays were scanned on an Agilent DNA microarray scanner G2505B (Agilent Technologies) at 5 micron resolution. Scanned image files were visually inspected for artifacts and subsequently analyzed.	Agilent DNA microarray scanner G2505B, 5 micron resolution	Cell line: LS411N; Medium: RPMI; SF2: 0.28	Median signal intensities from the Feature Extraction Software were converted to log2 and quantile normalized using the R package 鈥渓imma鈥?	GPL4133	Melanie,,Spitzner	melanie.spitzner@med.uni-goettingen.de	+49 (0) 551 - 39 10478	Department of General and Visceral Surgery	Georg-August-University Goettingen	Robert-Koch-Str. 40	Goettingen	37075	Germany	ftp://ftp.ncbi.nlm.nih.gov/geo/samples/GSM508nnn/GSM508857/suppl/GSM508857_Grade2_251485050790_S01_GE1-v5_95_Feb07_1_2.txt.gz	45015	LS411N	RPMI	3	0.282878
GSM508858	sw620.l15.3	GSM508858	Public on Feb 10 2011	Feb 12 2010	Feb 10 2011	RNA	1	colorectal cancer cell line	Homo sapiens	cell line: SW620	medium: L-15	sf2: 0.459016393442623	rep: 3	No treatment prior to expression profiling analysis.	Twelve human colorectal cancer cell lines were obtained from the American Type Culture Collection (ATCC, Manassas, VA): Caco-2, HT-29, LS411N, LS513, LS1034, SW403, SW480, SW620, SW837, SW1116, SW1463, and WiDr. All lines were cultured in their recommended medium (Invitrogen, Karlsruhe, Germany), supplemented with fetal bovine serum (Pan, Aidenbach, Germany) and 2mM L-glutamine (BioWhittaker, Ver…	total RNA	Total RNA was isolated using the RNeasy Mini kit (Qiagen, Hilden, Germany) according to the manufacturer's instructions, including a DNase treatment step. Nucleic acid quantity, quality and purity were determined using NanoDrop ND-1000 spectrophotometer (Peqlab, Erlangen, Germany) and a 2100 Bioanalyzer (Agilent Technologies, Palo Alto, CA). Only RNA samples with a RNA integrity number > 9.5 were…	Cy3	800 ng of total RNA were reverse-transcribed, amplified and labeled with Cy3 using the Low RNA Input Linear Amplification Kit, PLUS (Agilent Technologies). After purification, the cRNA yield and integration of cyanine 3-CTP was measured using a spectrophotometer. cRNA with a specific activity > 9.0 pmol/碌g was excluded from further experiments.	9606	Subsequently, 1.65 碌g of labeled cRNA per sample was fragmentized and hybridized overnight to a 4x44k gene expression microarray (Agilent Technologies). After a washing step the arrays were scanned on an Agilent DNA microarray scanner G2505B (Agilent Technologies) at 5 micron resolution. Scanned image files were visually inspected for artifacts and subsequently analyzed.	Agilent DNA microarray scanner G2505B, 5 micron resolution	Cell line: SW620; Medium: L-15; SF2: 0.46	Median signal intensities from the Feature Extraction Software were converted to log2 and quantile normalized using the R package 鈥渓imma鈥?	GPL4133	Melanie,,Spitzner	melanie.spitzner@med.uni-goettingen.de	+49 (0) 551 - 39 10478	Department of General and Visceral Surgery	Georg-August-University Goettingen	Robert-Koch-Str. 40	Goettingen	37075	Germany	ftp://ftp.ncbi.nlm.nih.gov/geo/samples/GSM508nnn/GSM508858/suppl/GSM508858_Grade2_251485050790_S01_GE1-v5_95_Feb07_1_3.txt.gz	45015	SW620	L-15	3	0.459016
GSM508859	sw403.l15.3	GSM508859	Public on Feb 10 2011	Feb 12 2010	Feb 10 2011	RNA	1	colorectal cancer cell line	Homo sapiens	cell line: SW403	medium: L-15	sf2: 0.757894736842105	rep: 3	No treatment prior to expression profiling analysis.	Twelve human colorectal cancer cell lines were obtained from the American Type Culture Collection (ATCC, Manassas, VA): Caco-2, HT-29, LS411N, LS513, LS1034, SW403, SW480, SW620, SW837, SW1116, SW1463, and WiDr. All lines were cultured in their recommended medium (Invitrogen, Karlsruhe, Germany), supplemented with fetal bovine serum (Pan, Aidenbach, Germany) and 2mM L-glutamine (BioWhittaker, Ver…	total RNA	Total RNA was isolated using the RNeasy Mini kit (Qiagen, Hilden, Germany) according to the manufacturer's instructions, including a DNase treatment step. Nucleic acid quantity, quality and purity were determined using NanoDrop ND-1000 spectrophotometer (Peqlab, Erlangen, Germany) and a 2100 Bioanalyzer (Agilent Technologies, Palo Alto, CA). Only RNA samples with a RNA integrity number > 9.5 were…	Cy3	800 ng of total RNA were reverse-transcribed, amplified and labeled with Cy3 using the Low RNA Input Linear Amplification Kit, PLUS (Agilent Technologies). After purification, the cRNA yield and integration of cyanine 3-CTP was measured using a spectrophotometer. cRNA with a specific activity > 9.0 pmol/碌g was excluded from further experiments.	9606	Subsequently, 1.65 碌g of labeled cRNA per sample was fragmentized and hybridized overnight to a 4x44k gene expression microarray (Agilent Technologies). After a washing step the arrays were scanned on an Agilent DNA microarray scanner G2505B (Agilent Technologies) at 5 micron resolution. Scanned image files were visually inspected for artifacts and subsequently analyzed.	Agilent DNA microarray scanner G2505B, 5 micron resolution	Cell line: SW403; Medium: L-15; SF2: 0.76	Median signal intensities from the Feature Extraction Software were converted to log2 and quantile normalized using the R package 鈥渓imma鈥?	GPL4133	Melanie,,Spitzner	melanie.spitzner@med.uni-goettingen.de	+49 (0) 551 - 39 10478	Department of General and Visceral Surgery	Georg-August-University Goettingen	Robert-Koch-Str. 40	Goettingen	37075	Germany	ftp://ftp.ncbi.nlm.nih.gov/geo/samples/GSM508nnn/GSM508859/suppl/GSM508859_Grade2_251485050790_S01_GE1-v5_95_Feb07_1_4.txt.gz	45015	SW403	L-15	3	0.757895
GSM508860	ls411n.rpmi.1	GSM508860	Public on Feb 10 2011	Feb 12 2010	Feb 10 2011	RNA	1	colorectal cancer cell line	Homo sapiens	cell line: LS411N	medium: RPMI	sf2: 0.28287841191067	rep: 1	No treatment prior to expression profiling analysis.	Twelve human colorectal cancer cell lines were obtained from the American Type Culture Collection (ATCC, Manassas, VA): Caco-2, HT-29, LS411N, LS513, LS1034, SW403, SW480, SW620, SW837, SW1116, SW1463, and WiDr. All lines were cultured in their recommended medium (Invitrogen, Karlsruhe, Germany), supplemented with fetal bovine serum (Pan, Aidenbach, Germany) and 2mM L-glutamine (BioWhittaker, Ver…	total RNA	Total RNA was isolated using the RNeasy Mini kit (Qiagen, Hilden, Germany) according to the manufacturer's instructions, including a DNase treatment step. Nucleic acid quantity, quality and purity were determined using NanoDrop ND-1000 spectrophotometer (Peqlab, Erlangen, Germany) and a 2100 Bioanalyzer (Agilent Technologies, Palo Alto, CA). Only RNA samples with a RNA integrity number > 9.5 were…	Cy3	800 ng of total RNA were reverse-transcribed, amplified and labeled with Cy3 using the Low RNA Input Linear Amplification Kit, PLUS (Agilent Technologies). After purification, the cRNA yield and integration of cyanine 3-CTP was measured using a spectrophotometer. cRNA with a specific activity > 9.0 pmol/碌g was excluded from further experiments.	9606	Subsequently, 1.65 碌g of labeled cRNA per sample was fragmentized and hybridized overnight to a 4x44k gene expression microarray (Agilent Technologies). After a washing step the arrays were scanned on an Agilent DNA microarray scanner G2505B (Agilent Technologies) at 5 micron resolution. Scanned image files were visually inspected for artifacts and subsequently analyzed.	Agilent DNA microarray scanner G2505B, 5 micron resolution	Cell line: LS411N; Medium: RPMI; SF2: 0.28	Median signal intensities from the Feature Extraction Software were converted to log2 and quantile normalized using the R package 鈥渓imma鈥?	GPL4133	Melanie,,Spitzner	melanie.spitzner@med.uni-goettingen.de	+49 (0) 551 - 39 10478	Department of General and Visceral Surgery	Georg-August-University Goettingen	Robert-Koch-Str. 40	Goettingen	37075	Germany	ftp://ftp.ncbi.nlm.nih.gov/geo/samples/GSM508nnn/GSM508860/suppl/GSM508860_Grade2_251485050755_S01_GE1-v5_95_Feb07_1_2.txt.gz	45015	LS411N	RPMI	1	0.282878
GSM508861	ht29.mccoy.2	GSM508861	Public on Feb 10 2011	Feb 12 2010	Feb 10 2011	RNA	1	colorectal cancer cell line	Homo sapiens	cell line: HT-29	medium: McCoy's	sf2: 0.81060606060606	rep: 2	No treatment prior to expression profiling analysis.	Twelve human colorectal cancer cell lines were obtained from the American Type Culture Collection (ATCC, Manassas, VA): Caco-2, HT-29, LS411N, LS513, LS1034, SW403, SW480, SW620, SW837, SW1116, SW1463, and WiDr. All lines were cultured in their recommended medium (Invitrogen, Karlsruhe, Germany), supplemented with fetal bovine serum (Pan, Aidenbach, Germany) and 2mM L-glutamine (BioWhittaker, Ver…	total RNA	Total RNA was isolated using the RNeasy Mini kit (Qiagen, Hilden, Germany) according to the manufacturer's instructions, including a DNase treatment step. Nucleic acid quantity, quality and purity were determined using NanoDrop ND-1000 spectrophotometer (Peqlab, Erlangen, Germany) and a 2100 Bioanalyzer (Agilent Technologies, Palo Alto, CA). Only RNA samples with a RNA integrity number > 9.5 were…	Cy3	800 ng of total RNA were reverse-transcribed, amplified and labeled with Cy3 using the Low RNA Input Linear Amplification Kit, PLUS (Agilent Technologies). After purification, the cRNA yield and integration of cyanine 3-CTP was measured using a spectrophotometer. cRNA with a specific activity > 9.0 pmol/碌g was excluded from further experiments.	9606	Subsequently, 1.65 碌g of labeled cRNA per sample was fragmentized and hybridized overnight to a 4x44k gene expression microarray (Agilent Technologies). After a washing step the arrays were scanned on an Agilent DNA microarray scanner G2505B (Agilent Technologies) at 5 micron resolution. Scanned image files were visually inspected for artifacts and subsequently analyzed.	Agilent DNA microarray scanner G2505B, 5 micron resolution	Cell line: HT-29; Medium: McCoy's; SF2: 0.81	Median signal intensities from the Feature Extraction Software were converted to log2 and quantile normalized using the R package 鈥渓imma鈥?	GPL4133	Melanie,,Spitzner	melanie.spitzner@med.uni-goettingen.de	+49 (0) 551 - 39 10478	Department of General and Visceral Surgery	Georg-August-University Goettingen	Robert-Koch-Str. 40	Goettingen	37075	Germany	ftp://ftp.ncbi.nlm.nih.gov/geo/samples/GSM508nnn/GSM508861/suppl/GSM508861_Grade2_251485050755_S01_GE1-v5_95_Feb07_1_3.txt.gz	45015	HT-29	McCoy's	2	0.810606
GSM508862	sw837.l15.2	GSM508862	Public on Feb 10 2011	Feb 12 2010	Feb 10 2011	RNA	1	colorectal cancer cell line	Homo sapiens	cell line: SW837	medium: L-15	sf2: 0.710691823899371	rep: 2	No treatment prior to expression profiling analysis.	Twelve human colorectal cancer cell lines were obtained from the American Type Culture Collection (ATCC, Manassas, VA): Caco-2, HT-29, LS411N, LS513, LS1034, SW403, SW480, SW620, SW837, SW1116, SW1463, and WiDr. All lines were cultured in their recommended medium (Invitrogen, Karlsruhe, Germany), supplemented with fetal bovine serum (Pan, Aidenbach, Germany) and 2mM L-glutamine (BioWhittaker, Ver…	total RNA	Total RNA was isolated using the RNeasy Mini kit (Qiagen, Hilden, Germany) according to the manufacturer's instructions, including a DNase treatment step. Nucleic acid quantity, quality and purity were determined using NanoDrop ND-1000 spectrophotometer (Peqlab, Erlangen, Germany) and a 2100 Bioanalyzer (Agilent Technologies, Palo Alto, CA). Only RNA samples with a RNA integrity number > 9.5 were…	Cy3	800 ng of total RNA were reverse-transcribed, amplified and labeled with Cy3 using the Low RNA Input Linear Amplification Kit, PLUS (Agilent Technologies). After purification, the cRNA yield and integration of cyanine 3-CTP was measured using a spectrophotometer. cRNA with a specific activity > 9.0 pmol/碌g was excluded from further experiments.	9606	Subsequently, 1.65 碌g of labeled cRNA per sample was fragmentized and hybridized overnight to a 4x44k gene expression microarray (Agilent Technologies). After a washing step the arrays were scanned on an Agilent DNA microarray scanner G2505B (Agilent Technologies) at 5 micron resolution. Scanned image files were visually inspected for artifacts and subsequently analyzed.	Agilent DNA microarray scanner G2505B, 5 micron resolution	Cell line: SW837; Medium: L-15; SF2: 0.71	Median signal intensities from the Feature Extraction Software were converted to log2 and quantile normalized using the R package 鈥渓imma鈥?	GPL4133	Melanie,,Spitzner	melanie.spitzner@med.uni-goettingen.de	+49 (0) 551 - 39 10478	Department of General and Visceral Surgery	Georg-August-University Goettingen	Robert-Koch-Str. 40	Goettingen	37075	Germany	ftp://ftp.ncbi.nlm.nih.gov/geo/samples/GSM508nnn/GSM508862/suppl/GSM508862_Grade2_251485050755_S01_GE1-v5_95_Feb07_1_4.txt.gz	45015	SW837	L-15	2	0.710692
GSM508863	sw620.l15.1	GSM508863	Public on Feb 10 2011	Feb 12 2010	Feb 10 2011	RNA	1	colorectal cancer cell line	Homo sapiens	cell line: SW620	medium: L-15	sf2: 0.459016393442623	rep: 1	No treatment prior to expression profiling analysis.	Twelve human colorectal cancer cell lines were obtained from the American Type Culture Collection (ATCC, Manassas, VA): Caco-2, HT-29, LS411N, LS513, LS1034, SW403, SW480, SW620, SW837, SW1116, SW1463, and WiDr. All lines were cultured in their recommended medium (Invitrogen, Karlsruhe, Germany), supplemented with fetal bovine serum (Pan, Aidenbach, Germany) and 2mM L-glutamine (BioWhittaker, Ver…	total RNA	Total RNA was isolated using the RNeasy Mini kit (Qiagen, Hilden, Germany) according to the manufacturer's instructions, including a DNase treatment step. Nucleic acid quantity, quality and purity were determined using NanoDrop ND-1000 spectrophotometer (Peqlab, Erlangen, Germany) and a 2100 Bioanalyzer (Agilent Technologies, Palo Alto, CA). Only RNA samples with a RNA integrity number > 9.5 were…	Cy3	800 ng of total RNA were reverse-transcribed, amplified and labeled with Cy3 using the Low RNA Input Linear Amplification Kit, PLUS (Agilent Technologies). After purification, the cRNA yield and integration of cyanine 3-CTP was measured using a spectrophotometer. cRNA with a specific activity > 9.0 pmol/碌g was excluded from further experiments.	9606	Subsequently, 1.65 碌g of labeled cRNA per sample was fragmentized and hybridized overnight to a 4x44k gene expression microarray (Agilent Technologies). After a washing step the arrays were scanned on an Agilent DNA microarray scanner G2505B (Agilent Technologies) at 5 micron resolution. Scanned image files were visually inspected for artifacts and subsequently analyzed.	Agilent DNA microarray scanner G2505B, 5 micron resolution	Cell line: SW620; Medium: L-15; SF2: 0.46	Median signal intensities from the Feature Extraction Software were converted to log2 and quantile normalized using the R package 鈥渓imma鈥?	GPL4133	Melanie,,Spitzner	melanie.spitzner@med.uni-goettingen.de	+49 (0) 551 - 39 10478	Department of General and Visceral Surgery	Georg-August-University Goettingen	Robert-Koch-Str. 40	Goettingen	37075	Germany	ftp://ftp.ncbi.nlm.nih.gov/geo/samples/GSM508nnn/GSM508863/suppl/GSM508863_Grade2_251485050462_S01_GE1-v5_95_Feb07_1_1.txt.gz	45015	SW620	L-15	1	0.459016
GSM508864	ls513.rpmi.1	GSM508864	Public on Feb 10 2011	Feb 12 2010	Feb 10 2011	RNA	1	colorectal cancer cell line	Homo sapiens	cell line: LS513	medium: RPMI	sf2: 0.593457943925234	rep: 1	No treatment prior to expression profiling analysis.	Twelve human colorectal cancer cell lines were obtained from the American Type Culture Collection (ATCC, Manassas, VA): Caco-2, HT-29, LS411N, LS513, LS1034, SW403, SW480, SW620, SW837, SW1116, SW1463, and WiDr. All lines were cultured in their recommended medium (Invitrogen, Karlsruhe, Germany), supplemented with fetal bovine serum (Pan, Aidenbach, Germany) and 2mM L-glutamine (BioWhittaker, Ver…	total RNA	Total RNA was isolated using the RNeasy Mini kit (Qiagen, Hilden, Germany) according to the manufacturer's instructions, including a DNase treatment step. Nucleic acid quantity, quality and purity were determined using NanoDrop ND-1000 spectrophotometer (Peqlab, Erlangen, Germany) and a 2100 Bioanalyzer (Agilent Technologies, Palo Alto, CA). Only RNA samples with a RNA integrity number > 9.5 were…	Cy3	800 ng of total RNA were reverse-transcribed, amplified and labeled with Cy3 using the Low RNA Input Linear Amplification Kit, PLUS (Agilent Technologies). After purification, the cRNA yield and integration of cyanine 3-CTP was measured using a spectrophotometer. cRNA with a specific activity > 9.0 pmol/碌g was excluded from further experiments.	9606	Subsequently, 1.65 碌g of labeled cRNA per sample was fragmentized and hybridized overnight to a 4x44k gene expression microarray (Agilent Technologies). After a washing step the arrays were scanned on an Agilent DNA microarray scanner G2505B (Agilent Technologies) at 5 micron resolution. Scanned image files were visually inspected for artifacts and subsequently analyzed.	Agilent DNA microarray scanner G2505B, 5 micron resolution	Cell line: LS513; Medium: RPMI; SF2: 0.59	Median signal intensities from the Feature Extraction Software were converted to log2 and quantile normalized using the R package 鈥渓imma鈥?	GPL4133	Melanie,,Spitzner	melanie.spitzner@med.uni-goettingen.de	+49 (0) 551 - 39 10478	Department of General and Visceral Surgery	Georg-August-University Goettingen	Robert-Koch-Str. 40	Goettingen	37075	Germany	ftp://ftp.ncbi.nlm.nih.gov/geo/samples/GSM508nnn/GSM508864/suppl/GSM508864_Grade2_251485050462_S01_GE1-v5_95_Feb07_1_2.txt.gz	45015	LS513	RPMI	1	0.593458
GSM508865	sw480.rpmi.4	GSM508865	Public on Feb 10 2011	Feb 12 2010	Feb 10 2011	RNA	1	colorectal cancer cell line	Homo sapiens	cell line: SW480	medium: RPMI	sf2: NA	rep: 4	No treatment prior to expression profiling analysis.	Twelve human colorectal cancer cell lines were obtained from the American Type Culture Collection (ATCC, Manassas, VA): Caco-2, HT-29, LS411N, LS513, LS1034, SW403, SW480, SW620, SW837, SW1116, SW1463, and WiDr. All lines were cultured in their recommended medium (Invitrogen, Karlsruhe, Germany), supplemented with fetal bovine serum (Pan, Aidenbach, Germany) and 2mM L-glutamine (BioWhittaker, Ver…	total RNA	Total RNA was isolated using the RNeasy Mini kit (Qiagen, Hilden, Germany) according to the manufacturer's instructions, including a DNase treatment step. Nucleic acid quantity, quality and purity were determined using NanoDrop ND-1000 spectrophotometer (Peqlab, Erlangen, Germany) and a 2100 Bioanalyzer (Agilent Technologies, Palo Alto, CA). Only RNA samples with a RNA integrity number > 9.5 were…	Cy3	800 ng of total RNA were reverse-transcribed, amplified and labeled with Cy3 using the Low RNA Input Linear Amplification Kit, PLUS (Agilent Technologies). After purification, the cRNA yield and integration of cyanine 3-CTP was measured using a spectrophotometer. cRNA with a specific activity > 9.0 pmol/碌g was excluded from further experiments.	9606	Subsequently, 1.65 碌g of labeled cRNA per sample was fragmentized and hybridized overnight to a 4x44k gene expression microarray (Agilent Technologies). After a washing step the arrays were scanned on an Agilent DNA microarray scanner G2505B (Agilent Technologies) at 5 micron resolution. Scanned image files were visually inspected for artifacts and subsequently analyzed.	Agilent DNA microarray scanner G2505B, 5 micron resolution	Cell line: SW480; Medium: RPMI	Median signal intensities from the Feature Extraction Software were converted to log2 and quantile normalized using the R package 鈥渓imma鈥?	GPL4133	Melanie,,Spitzner	melanie.spitzner@med.uni-goettingen.de	+49 (0) 551 - 39 10478	Department of General and Visceral Surgery	Georg-August-University Goettingen	Robert-Koch-Str. 40	Goettingen	37075	Germany	ftp://ftp.ncbi.nlm.nih.gov/geo/samples/GSM508nnn/GSM508865/suppl/GSM508865_Grade2_251485050462_S01_GE1-v5_95_Feb07_1_3.txt.gz	45015	SW480	RPMI	4	NA
GSM508866	sw1116.l15.1	GSM508866	Public on Feb 10 2011	Feb 12 2010	Feb 10 2011	RNA	1	colorectal cancer cell line	Homo sapiens	cell line: SW1116	medium: L-15	sf2: 0.682692307692308	rep: 1	No treatment prior to expression profiling analysis.	Twelve human colorectal cancer cell lines were obtained from the American Type Culture Collection (ATCC, Manassas, VA): Caco-2, HT-29, LS411N, LS513, LS1034, SW403, SW480, SW620, SW837, SW1116, SW1463, and WiDr. All lines were cultured in their recommended medium (Invitrogen, Karlsruhe, Germany), supplemented with fetal bovine serum (Pan, Aidenbach, Germany) and 2mM L-glutamine (BioWhittaker, Ver…	total RNA	Total RNA was isolated using the RNeasy Mini kit (Qiagen, Hilden, Germany) according to the manufacturer's instructions, including a DNase treatment step. Nucleic acid quantity, quality and purity were determined using NanoDrop ND-1000 spectrophotometer (Peqlab, Erlangen, Germany) and a 2100 Bioanalyzer (Agilent Technologies, Palo Alto, CA). Only RNA samples with a RNA integrity number > 9.5 were…	Cy3	800 ng of total RNA were reverse-transcribed, amplified and labeled with Cy3 using the Low RNA Input Linear Amplification Kit, PLUS (Agilent Technologies). After purification, the cRNA yield and integration of cyanine 3-CTP was measured using a spectrophotometer. cRNA with a specific activity > 9.0 pmol/碌g was excluded from further experiments.	9606	Subsequently, 1.65 碌g of labeled cRNA per sample was fragmentized and hybridized overnight to a 4x44k gene expression microarray (Agilent Technologies). After a washing step the arrays were scanned on an Agilent DNA microarray scanner G2505B (Agilent Technologies) at 5 micron resolution. Scanned image files were visually inspected for artifacts and subsequently analyzed.	Agilent DNA microarray scanner G2505B, 5 micron resolution	Cell line: SW1116; Medium: L-15; SF2: 0.68	Median signal intensities from the Feature Extraction Software were converted to log2 and quantile normalized using the R package 鈥渓imma鈥?	GPL4133	Melanie,,Spitzner	melanie.spitzner@med.uni-goettingen.de	+49 (0) 551 - 39 10478	Department of General and Visceral Surgery	Georg-August-University Goettingen	Robert-Koch-Str. 40	Goettingen	37075	Germany	ftp://ftp.ncbi.nlm.nih.gov/geo/samples/GSM508nnn/GSM508866/suppl/GSM508866_Grade2_251485050462_S01_GE1-v5_95_Feb07_1_4.txt.gz	45015	SW1116	L-15	1	0.682692
GSM508867	sw1116.l15.2	GSM508867	Public on Feb 10 2011	Feb 12 2010	Feb 10 2011	RNA	1	colorectal cancer cell line	Homo sapiens	cell line: SW1116	medium: L-15	sf2: 0.682692307692308	rep: 2	No treatment prior to expression profiling analysis.	Twelve human colorectal cancer cell lines were obtained from the American Type Culture Collection (ATCC, Manassas, VA): Caco-2, HT-29, LS411N, LS513, LS1034, SW403, SW480, SW620, SW837, SW1116, SW1463, and WiDr. All lines were cultured in their recommended medium (Invitrogen, Karlsruhe, Germany), supplemented with fetal bovine serum (Pan, Aidenbach, Germany) and 2mM L-glutamine (BioWhittaker, Ver…	total RNA	Total RNA was isolated using the RNeasy Mini kit (Qiagen, Hilden, Germany) according to the manufacturer's instructions, including a DNase treatment step. Nucleic acid quantity, quality and purity were determined using NanoDrop ND-1000 spectrophotometer (Peqlab, Erlangen, Germany) and a 2100 Bioanalyzer (Agilent Technologies, Palo Alto, CA). Only RNA samples with a RNA integrity number > 9.5 were…	Cy3	800 ng of total RNA were reverse-transcribed, amplified and labeled with Cy3 using the Low RNA Input Linear Amplification Kit, PLUS (Agilent Technologies). After purification, the cRNA yield and integration of cyanine 3-CTP was measured using a spectrophotometer. cRNA with a specific activity > 9.0 pmol/碌g was excluded from further experiments.	9606	Subsequently, 1.65 碌g of labeled cRNA per sample was fragmentized and hybridized overnight to a 4x44k gene expression microarray (Agilent Technologies). After a washing step the arrays were scanned on an Agilent DNA microarray scanner G2505B (Agilent Technologies) at 5 micron resolution. Scanned image files were visually inspected for artifacts and subsequently analyzed.	Agilent DNA microarray scanner G2505B, 5 micron resolution	Cell line: SW1116; Medium: L-15; SF2: 0.68	Median signal intensities from the Feature Extraction Software were converted to log2 and quantile normalized using the R package 鈥渓imma鈥?	GPL4133	Melanie,,Spitzner	melanie.spitzner@med.uni-goettingen.de	+49 (0) 551 - 39 10478	Department of General and Visceral Surgery	Georg-August-University Goettingen	Robert-Koch-Str. 40	Goettingen	37075	Germany	ftp://ftp.ncbi.nlm.nih.gov/geo/samples/GSM508nnn/GSM508867/suppl/GSM508867_Grade2_251485050463_S01_GE1-v5_95_Feb07_1_1.txt.gz	45015	SW1116	L-15	2	0.682692
GSM508868	caco2.rpmi.2	GSM508868	Public on Feb 10 2011	Feb 12 2010	Feb 10 2011	RNA	1	colorectal cancer cell line	Homo sapiens	cell line: Caco-2	medium: RPMI	sf2: NA	rep: 2	No treatment prior to expression profiling analysis.	Twelve human colorectal cancer cell lines were obtained from the American Type Culture Collection (ATCC, Manassas, VA): Caco-2, HT-29, LS411N, LS513, LS1034, SW403, SW480, SW620, SW837, SW1116, SW1463, and WiDr. All lines were cultured in their recommended medium (Invitrogen, Karlsruhe, Germany), supplemented with fetal bovine serum (Pan, Aidenbach, Germany) and 2mM L-glutamine (BioWhittaker, Ver…	total RNA	Total RNA was isolated using the RNeasy Mini kit (Qiagen, Hilden, Germany) according to the manufacturer's instructions, including a DNase treatment step. Nucleic acid quantity, quality and purity were determined using NanoDrop ND-1000 spectrophotometer (Peqlab, Erlangen, Germany) and a 2100 Bioanalyzer (Agilent Technologies, Palo Alto, CA). Only RNA samples with a RNA integrity number > 9.5 were…	Cy3	800 ng of total RNA were reverse-transcribed, amplified and labeled with Cy3 using the Low RNA Input Linear Amplification Kit, PLUS (Agilent Technologies). After purification, the cRNA yield and integration of cyanine 3-CTP was measured using a spectrophotometer. cRNA with a specific activity > 9.0 pmol/碌g was excluded from further experiments.	9606	Subsequently, 1.65 碌g of labeled cRNA per sample was fragmentized and hybridized overnight to a 4x44k gene expression microarray (Agilent Technologies). After a washing step the arrays were scanned on an Agilent DNA microarray scanner G2505B (Agilent Technologies) at 5 micron resolution. Scanned image files were visually inspected for artifacts and subsequently analyzed.	Agilent DNA microarray scanner G2505B, 5 micron resolution	Cell line: Caco-2; Medium: RPMI	Median signal intensities from the Feature Extraction Software were converted to log2 and quantile normalized using the R package 鈥渓imma鈥?	GPL4133	Melanie,,Spitzner	melanie.spitzner@med.uni-goettingen.de	+49 (0) 551 - 39 10478	Department of General and Visceral Surgery	Georg-August-University Goettingen	Robert-Koch-Str. 40	Goettingen	37075	Germany	ftp://ftp.ncbi.nlm.nih.gov/geo/samples/GSM508nnn/GSM508868/suppl/GSM508868_Grade2_251485050463_S01_GE1-v5_95_Feb07_1_2.txt.gz	45015	Caco-2	RPMI	2	NA
GSM508869	widr.mem.2	GSM508869	Public on Feb 10 2011	Feb 12 2010	Feb 10 2011	RNA	1	colorectal cancer cell line	Homo sapiens	cell line: WiDr	medium: MEM	sf2: 0.395744680851064	rep: 2	No treatment prior to expression profiling analysis.	Twelve human colorectal cancer cell lines were obtained from the American Type Culture Collection (ATCC, Manassas, VA): Caco-2, HT-29, LS411N, LS513, LS1034, SW403, SW480, SW620, SW837, SW1116, SW1463, and WiDr. All lines were cultured in their recommended medium (Invitrogen, Karlsruhe, Germany), supplemented with fetal bovine serum (Pan, Aidenbach, Germany) and 2mM L-glutamine (BioWhittaker, Ver…	total RNA	Total RNA was isolated using the RNeasy Mini kit (Qiagen, Hilden, Germany) according to the manufacturer's instructions, including a DNase treatment step. Nucleic acid quantity, quality and purity were determined using NanoDrop ND-1000 spectrophotometer (Peqlab, Erlangen, Germany) and a 2100 Bioanalyzer (Agilent Technologies, Palo Alto, CA). Only RNA samples with a RNA integrity number > 9.5 were…	Cy3	800 ng of total RNA were reverse-transcribed, amplified and labeled with Cy3 using the Low RNA Input Linear Amplification Kit, PLUS (Agilent Technologies). After purification, the cRNA yield and integration of cyanine 3-CTP was measured using a spectrophotometer. cRNA with a specific activity > 9.0 pmol/碌g was excluded from further experiments.	9606	Subsequently, 1.65 碌g of labeled cRNA per sample was fragmentized and hybridized overnight to a 4x44k gene expression microarray (Agilent Technologies). After a washing step the arrays were scanned on an Agilent DNA microarray scanner G2505B (Agilent Technologies) at 5 micron resolution. Scanned image files were visually inspected for artifacts and subsequently analyzed.	Agilent DNA microarray scanner G2505B, 5 micron resolution	Cell line: WiDr; Medium: MEM; SF2: 0.4	Median signal intensities from the Feature Extraction Software were converted to log2 and quantile normalized using the R package 鈥渓imma鈥?	GPL4133	Melanie,,Spitzner	melanie.spitzner@med.uni-goettingen.de	+49 (0) 551 - 39 10478	Department of General and Visceral Surgery	Georg-August-University Goettingen	Robert-Koch-Str. 40	Goettingen	37075	Germany	ftp://ftp.ncbi.nlm.nih.gov/geo/samples/GSM508nnn/GSM508869/suppl/GSM508869_Grade2_251485050463_S01_GE1-v5_95_Feb07_1_3.txt.gz	45015	WiDr	MEM	2	0.395745
GSM508870	caco2.rpmi.1	GSM508870	Public on Feb 10 2011	Feb 12 2010	Feb 10 2011	RNA	1	colorectal cancer cell line	Homo sapiens	cell line: Caco-2	medium: RPMI	sf2: NA	rep: 1	No treatment prior to expression profiling analysis.	Twelve human colorectal cancer cell lines were obtained from the American Type Culture Collection (ATCC, Manassas, VA): Caco-2, HT-29, LS411N, LS513, LS1034, SW403, SW480, SW620, SW837, SW1116, SW1463, and WiDr. All lines were cultured in their recommended medium (Invitrogen, Karlsruhe, Germany), supplemented with fetal bovine serum (Pan, Aidenbach, Germany) and 2mM L-glutamine (BioWhittaker, Ver…	total RNA	Total RNA was isolated using the RNeasy Mini kit (Qiagen, Hilden, Germany) according to the manufacturer's instructions, including a DNase treatment step. Nucleic acid quantity, quality and purity were determined using NanoDrop ND-1000 spectrophotometer (Peqlab, Erlangen, Germany) and a 2100 Bioanalyzer (Agilent Technologies, Palo Alto, CA). Only RNA samples with a RNA integrity number > 9.5 were…	Cy3	800 ng of total RNA were reverse-transcribed, amplified and labeled with Cy3 using the Low RNA Input Linear Amplification Kit, PLUS (Agilent Technologies). After purification, the cRNA yield and integration of cyanine 3-CTP was measured using a spectrophotometer. cRNA with a specific activity > 9.0 pmol/碌g was excluded from further experiments.	9606	Subsequently, 1.65 碌g of labeled cRNA per sample was fragmentized and hybridized overnight to a 4x44k gene expression microarray (Agilent Technologies). After a washing step the arrays were scanned on an Agilent DNA microarray scanner G2505B (Agilent Technologies) at 5 micron resolution. Scanned image files were visually inspected for artifacts and subsequently analyzed.	Agilent DNA microarray scanner G2505B, 5 micron resolution	Cell line: Caco-2; Medium: RPMI	Median signal intensities from the Feature Extraction Software were converted to log2 and quantile normalized using the R package 鈥渓imma鈥?	GPL4133	Melanie,,Spitzner	melanie.spitzner@med.uni-goettingen.de	+49 (0) 551 - 39 10478	Department of General and Visceral Surgery	Georg-August-University Goettingen	Robert-Koch-Str. 40	Goettingen	37075	Germany	ftp://ftp.ncbi.nlm.nih.gov/geo/samples/GSM508nnn/GSM508870/suppl/GSM508870_Grade2_251485050463_S01_GE1-v5_95_Feb07_1_4.txt.gz	45015	Caco-2	RPMI	1	NA
