# Supplementary material for: A 41-Gene Pair Signature for Predicting the Pathological Response of Locally Advanced Rectal Cancer to Neoadjuvant Chemoradiation
Source: Front Med (Lausanne). 2021 Sep 14;8:744295. doi: 10.3389/fmed.2021.744295 (PMC8476893; doi:10.3389/fmed.2021.744295)
Supplement: Supplementary file 7 [file Data_Sheet_7.XLSX]

## Sheet: gse35452_expr
	GSM868548	GSM868549	GSM868550	GSM868551	GSM868552	GSM868553	GSM868554	GSM868555	GSM868556	GSM868557	GSM868558	GSM868559	GSM868560	GSM868561	GSM868562	GSM868563	GSM868564	GSM868565	GSM868566	GSM868567	GSM868568	GSM868569	GSM868570	GSM868571	GSM868572	GSM868573	GSM868574	GSM868575	GSM868576	GSM868577	GSM868578	GSM868579	GSM868580	GSM868581	GSM868582	GSM868583	GSM868584	GSM868585	GSM868586	GSM868587	GSM868588	GSM868589	GSM868590	GSM868591	GSM868592	GSM868593
RFC2	0.464936	0.388733	-0.267931	-0.582957	0.0679302	0.23854	0.839453	0.413777	-0.510266	0.472869	0.48027	0.292762	-0.605259	-0.37313	0.654744	-0.145422	0.525149	-0.457573	0.241428	-0.0533838	-0.14568	-0.508177	0.17317	0.473917	0.251673	0.247181	-1.05421	0.389507	0.433038	0.239867	-0.79161	-0.140536	-0.322773	-0.0291796	-0.234295	-0.673014	0.0152416	-0.0273285	0.530359	-0.430995	-0.928874	0.741977	0.188286	-0.60512	-0.458982	-0.0152416
ESRRA	-0.0374844	-0.08128	-0.357744	0.243378	-0.262287	-0.0879652	0.453352	0.466765	-0.816247	0.0424449	0.171198	-0.185032	-0.00320458	-0.483814	0.404357	-0.502498	0.341828	-0.405413	-0.32482	0.0752275	-0.177086	-0.196911	-0.543858	0.491741	0.00173354	0.0932453	-0.321291	0.236397	0.515784	-0.0150664	-0.0784352	0.211668	0.333909	0.048373	0.310345	0.456495	-0.64129	0.585404	0.708938	0.346653	0.0286548	0.117121	-0.299196	-0.00173354	-0.569994	-1.56898
CYTOR	-0.745489	0.577203	-1.00578	-0.726618	0.379756	-1.54814	0.299713	0.0716431	0.509832	0.192011	-1.25896	0.0998228	0.0136478	-0.767106	0.106585	0.505673	-0.169575	0.521761	-3.053	-0.673719	1.18206	1.56666	1.22328	-2.90686	0.339785	0.178211	-0.53482	-0.0282505	-2.87326	-0.425628	0.507749	-0.432212	-0.0965135	-1.5222	-1.62705	-1.87379	0.216208	-0.0136478	0.164447	-0.371482	-0.285415	-0.56524	0.165161	0.152523	0.661786	0.367563
ADAM32	-0.456432	-0.131159	0.4935	0.11046	0.0102074	-1.09403	0.199963	-1.69264	-1.12228	-0.0882127	-0.0658739	-3.41388	1.01896	-0.524498	-0.782897	0.0119956	1.03503	0.00635982	-0.00967145	-1.63639	-1.45597	1.10001	0.258395	-0.00635982	0.279925	-0.505552	-0.452835	0.685299	0.92931	1.72865	-0.0339167	-0.565189	-0.236422	0.844116	1.21983	0.372559	-0.235835	-0.142947	1.20386	1.58821	0.0295098	0.530278	0.976269	1.88236	-0.0972562	-0.867041
PRR22	-0.357573	-0.25733	-0.57916	-0.105021	0.539497	0.196725	0.680112	-0.578699	-0.646378	0.0274525	-0.185364	-0.142647	0.116369	0.0806956	0.341182	-0.738335	0.546534	-0.972854	0.566124	0.605082	-0.0274525	0.17736	-0.632965	0.211484	0.0654306	-0.181631	-0.682616	0.606774	-0.280168	-0.136115	-0.56045	-0.550065	0.471044	-0.11704	0.364328	-0.445112	0.229496	0.119095	0.559986	-0.197336	0.766185	0.980457	-0.320096	0.145381	0.265763	-1.09102
PXK	-0.359757	-0.187507	-0.17385	-0.0915036	0.09168	0.422317	1.26542	0.383906	0.0450711	0.687804	0.473468	0.0392671	-0.134976	-0.0724759	-0.146076	0.176298	0.815115	0.405665	-0.0291886	-0.278496	-0.00911665	0.474914	0.392472	0.307036	0.032063	0.161327	0.354473	0.175863	-0.275272	-0.264681	-0.514239	-0.0155253	-0.285067	-0.496685	0.012259	-0.404256	-1.14335	0.127551	0.00911665	-0.197622	-0.277646	-1.74621	0.132949	-0.473475	0.531046	-0.299696
MSANTD3	-0.675883	-0.485287	-1.01882	-0.364179	0.578132	0.0172925	0.348451	-0.259765	0.153817	0.0346952	-0.276475	0.577959	-0.407123	0.411125	0.0739455	0.209551	0.496433	0.474346	-0.281486	-0.0566268	0.246458	0.404348	0.949444	-0.384398	0.332752	0.646356	0.401221	0.330966	-0.45028	0.463332	-0.0172925	-0.385144	-0.0479913	-0.445271	0.0579944	-0.269916	0.389487	0.0575662	-0.468423	-0.316445	-0.511131	-0.87918	-0.404326	-0.202948	-0.0899634	0.0941229
TIMD4	-0.36324	1.05839	1.09151	-3.28095	-0.0159733	-4.76621	-1.30181	-1.45747	0.518022	0.234198	-1.19608	-2.59328	-2.32463	0.154098	0.129635	0.317742	-3.39333	-2.79848	-0.421199	-2.47472	1.00413	-0.207478	-2.80368	-0.514297	0.257478	0.0159733	0.860328	-0.765666	0.0213244	-0.0656764	0.237727	-2.243	0.518235	-0.24625	0.267226	-0.544991	-0.488597	0.446791	-1.19387	1.39616	0.417303	1.11851	0.89016	1.03098	0.200713	0.0266545
SLC39A5	1.01563	-1.24329	-0.896343	0.439377	-1.08756	1.56563	-0.045897	0.176013	-0.408136	0.530714	0.0955424	-0.801803	-0.00592375	0.584783	0.720414	-3.09156	-1.36403	-0.838604	-0.426298	-0.092773	0.266527	-1.49681	-1.13681	-0.484098	-0.851278	-0.00984526	0.00592375	-0.225461	0.737872	-0.180919	0.95574	1.03989	0.762001	0.654716	0.933214	0.847516	-1.67413	0.484169	-0.240922	0.147597	0.820036	0.0195374	0.922613	-0.0347657	-0.229305	0.116975
ATP6V1E2	-0.342751	0.705525	-0.000282	0.192368	-0.154553	0.250203	0.246529	-0.588816	0.10743	-0.375483	0.187808	0.636011	0.0854821	-0.404461	0.826039	-0.407682	0.565886	-0.266489	-0.0221272	1.2629	-0.258575	-0.0506587	0.625558	-0.0904708	0.458003	0.741817	-0.485382	0.636543	-0.950818	0.260312	-0.724133	-0.256169	-0.441663	-0.270297	-0.892721	0.0991249	-0.301818	-1.58316	-0.433106	0.746481	-0.194356	0.67087	0.304846	0.000282	0.321756	0.798346
CILP2	0.205902	1.57058	1.78235	-0.60377	0.922149	-0.205902	1.26649	0.382681	-2.07611	-2.27637	0.596616	-0.373941	-1.28665	1.62806	1.26138	-1.46825	-3.29537	-1.36653	-2.43959	-1.75664	-1.45523	1.37846	1.75289	-1.00901	0.768993	0.770925	0.509813	0.968788	1.28968	2.03623	0.235892	1.9626	-0.829593	-2.4313	-0.346122	-2.78418	0.940754	1.92395	-1.69926	-1.6237	-1.51939	0.702685	0.833181	-0.294618	-1.36378	-2.1142
PIGX	-0.591671	0.820644	-0.00714087	-0.272662	-0.392486	0.257574	0.455391	0.143813	0.0586035	-0.111813	-0.061178	-0.439353	-0.151489	-0.351537	-0.0149572	-0.267951	0.365838	-0.599031	-0.159493	0.125386	-0.0793674	-0.169248	-0.286156	-0.695831	-0.0809009	0.470577	-0.509878	-0.0531137	0.291483	0.359046	-0.0179183	0.231076	0.414832	-0.101338	0.111161	0.282055	-0.170972	0.333377	0.875432	0.840371	0.304293	0.831834	0.00714087	0.575468	0.274811	0.632206
TMEM196	-0.558123	0.174471	-0.146703	-0.206041	-0.546875	-0.685647	2.64362	-0.0162778	0.745201	0.353994	0.657998	-0.831851	1.92841	-0.826858	0.402564	0.485016	-0.442725	2.50233	-1.20816	0.130589	1.75314	-0.550374	-0.0643654	0.500641	-0.108275	-0.555707	-0.808186	0.40945	2.43967	0.493603	-0.142227	-0.319879	-1.6605	0.0710678	2.06855	1.58429	1.90043	-0.168713	0.19699	0.858329	-1.07858	-1.12342	0.135157	-0.422345	-0.441465	0.0162783
SLC39A13	-0.119174	-0.442889	-0.551747	0.00127649	0.432817	0.0797257	0.0355859	0.0982947	-0.0572619	-0.183489	-0.210853	0.8055	-0.544176	-0.206108	-0.199252	-0.00127649	-0.325854	0.953455	0.289159	-0.154696	-0.0356603	0.596606	0.623826	0.332784	0.524332	-0.353489	0.0944076	0.683331	-0.114649	0.711836	-0.05551	0.567253	0.205859	0.129577	-0.0252881	-0.38731	0.245677	0.196026	-0.400432	0.207073	0.323108	-0.53034	0.433493	-0.510176	-0.462009	-0.258469
BEST4	1.31608	-2.06458	1.27415	-3.92634	-4.37549	-2.32455	-2.66961	0.0805116	2.45804	0.543793	-2.41507	-3.54411	1.31863	1.0736	-0.350434	1.49237	-0.926958	-2.3494	-2.47689	-1.30499	0.263173	0.325601	-1.19912	1.10356	-2.38485	0.0394301	0.953189	0.405722	-1.38477	0.833074	0.65665	0.0439768	1.04824	0.208207	-1.45365	-0.0394301	-1.99585	-1.12766	-1.73312	1.25713	1.45007	-2.87857	0.290021	-2.81802	0.792675	-2.26749
CORO6	-0.375424	-0.00570059	0.315937	-0.27342	0.443785	-1.17995	-0.756831	-0.231839	0.381757	-0.55496	-0.619534	-0.146763	0.318209	-1.10144	0.425752	0.300943	0.454973	-0.247896	0.0900469	-0.428076	0.251362	0.1327	0.193003	0.0745492	-0.234834	-0.149075	0.00570059	-0.393655	0.17274	-0.24299	-0.0354605	0.0696778	-0.630782	0.25716	-0.0440683	-0.290759	-0.63398	0.0261998	-0.488108	0.945891	-0.799574	0.370049	0.0515971	1.25398	0.960065	0.433719
ALG10	-0.587681	-0.298453	-0.528532	-0.587552	-0.0621214	0.856736	-0.033206	-0.190331	0.105435	1.08917	0.34982	0.0697613	-0.136879	0.147707	0.28623	0.0121121	-0.150981	-1.05422	0.163363	-0.168095	0.029129	-0.366847	-0.221595	-0.0427942	0.47059	0.0508041	-0.57076	-0.152438	0.293463	0.23888	-0.882504	-0.652539	0.316891	-0.413046	0.808627	-0.46078	1.42654	0.210315	0.0865283	0.436688	-0.0121121	0.694631	-0.616286	-0.831021	0.245993	0.537982
NEXN	0.119526	-0.418612	0.195854	0.343683	0.782156	0.641783	-0.916155	-0.940066	0.485158	-0.878221	-0.0426717	1.47348	0.703084	-0.0597434	-0.417073	-0.455229	-0.760662	1.06204	-0.706159	0.523411	0.53166	1.43601	0.866495	-1.10763	1.07603	-0.141513	1.49857	1.06726	-0.731877	0.436947	0.135112	0.437801	0.276256	0.292979	-0.756479	-0.79425	-0.710066	-1.32523	-1.49206	-1.35114	0.13752	0.0426717	-0.734929	-1.46725	-0.0899105	-0.512192
C15orf40	0.443747	-0.999473	-0.19973	0.391872	0.298037	0.177187	0.0424619	-0.611491	-0.489973	-0.00794363	0.247086	0.0990729	0.215725	0.0775037	0.59097	-0.1556	-0.400769	-0.0248885	-0.533846	-0.295043	0.00794363	-0.440016	-0.159515	-0.0906358	0.233594	0.592439	0.16945	0.189936	0.339599	0.232859	-0.0371089	0.345749	-0.149769	0.271116	0.427351	0.44609	-0.757483	-0.0568433	-0.165706	0.463527	0.279449	-0.110583	-0.218789	-0.443906	-1.19689	-0.728491
RAX2	0.0613866	0.190037	-0.257173	0.31436	0.279722	-0.0263343	0.583928	-0.0355382	0.150338	0.199749	0.171459	-2.92451	0.421132	0.0263343	0.851449	0.539338	0.0686107	0.268779	0.418062	-0.474374	0.847447	-0.709894	0.775641	0.392116	0.215515	-0.0902658	-0.0462861	0.0669475	0.222549	-0.859658	-0.975319	-0.442187	-1.26013	-1.1658	-0.946411	-0.843425	-0.84213	-0.691033	-1.24822	-0.248768	-0.6285	0.394153	-0.864785	0.0612378	-0.285331	-0.118419
MFAP3	-0.282093	0.413251	0.393267	-0.148934	-0.542873	-0.0781183	-0.324617	0.207952	-0.370193	0.512059	-0.366328	0.116807	-0.442005	0.0408268	-0.399325	-0.00482845	0.0432673	-0.416338	-0.0975523	-0.0759983	0.105487	-0.296099	-0.300211	-0.318589	0.0292349	-0.850234	-0.022646	0.00482845	-0.0504999	0.451221	0.704845	0.307063	0.0327778	0.374243	0.370744	0.686599	0.119427	0.576685	0.573713	0.458134	0.59201	0.252145	-0.851913	-0.674759	-0.719177	-0.549129
GIMAP1	0.312836	-0.354852	1.24893	0.843123	1.09746	-0.668211	-0.578961	0.212891	0.356296	-0.517277	-0.161806	0.463666	1.61196	0.595458	-1.04267	-0.706744	-0.477795	0.243777	-0.048553	0.210356	1.07235	0.640098	-0.00936508	0.0698609	-0.107818	0.485551	1.12026	0.113007	-0.0277209	-0.609176	0.00936508	-0.975278	-0.350837	0.622538	-0.337738	0.431625	-0.721938	0.210738	-0.814446	-0.329957	-0.296111	-0.800302	0.688021	-0.342803	0.521162	-0.0614977
CCDC65	-0.0885754	-1.25879	0.0886002	0.880384	-2.42591	-0.512576	0.675888	0.895898	-0.884298	-0.461726	-0.921304	0.52687	-0.0612407	-0.0780449	-1.01113	-0.785593	3.1108	0.369727	0.13805	-0.814107	0.147173	0.364163	0.0612402	-1.76102	-0.142061	-0.0626297	-0.219283	0.268845	2.20276	2.76124	-1.00413	0.616924	-0.600759	0.564128	-0.941735	-1.08185	0.416285	-0.0818748	2.70343	-1.10521	-1.83484	1.2404	0.606235	1.03001	0.422391	0.810463
CFAP53	-0.827131	1.73307	-2.42939	0.790582	0.931103	0.428212	0.25172	-1.67246	2.0247	-0.707705	0.103079	0.362549	0.584566	-1.07626	1.09578	-0.895155	-0.131833	0.00510645	-1.57668	1.47047	-1.35915	-3.66453	0.970314	-0.539456	-3.53914	0.0902252	0.726026	0.148511	-1.84343	-1.82114	-2.29833	-1.78536	-0.00510597	-1.91103	-1.45775	-1.58501	-3.11	0.288547	-2.96822	1.43062	0.32298	1.05707	0.887702	0.570738	0.731445	-0.0366135
TRIOBP	0.335517	0.322391	0.556521	0.576942	-0.233716	0.930296	-0.602703	2.17777	-0.219823	0.0288422	-0.515161	-0.000786	-0.512111	-0.243282	0.00846934	-1.10981	0.56292	-0.0637767	0.229923	-0.852837	0.1935	0.052779	0.371442	-0.783243	-0.848663	-0.556957	-0.510285	-0.960857	-0.0918024	-0.0170958	-0.226706	-0.361094	0.0590498	-0.00623441	0.000786	-0.511897	0.684965	-0.0598443	0.441284	0.453962	-0.595418	1.53104	0.0861773	1.11287	0.637184	1.1944
CATSPER1	0.0617642	0.0142102	-1.48002	-1.81621	0.2333	0.0339813	-0.639389	-1.49124	0.733753	-0.706582	-2.33415	0.0723872	0.0917587	-0.0543151	-0.0142102	0.435876	0.259141	0.404373	-0.166822	0.0246639	0.264983	-0.207506	-0.266159	0.0467143	-0.130413	-0.115801	0.250875	0.162192	0.244403	0.707986	0.336688	0.502572	0.511445	0.464985	-1.06215	-4.10518	-0.639439	-0.160398	0.046217	-2.22917	-0.0480919	-1.20404	0.446672	-1.30348	-1.57847	-1.95387
GSC	-0.961928	0.932783	-0.49015	0.742242	-0.627456	0.45055	0.761404	-0.190463	0.395734	-0.233662	-0.719307	0.330872	-0.0869303	-0.817595	0.338426	0.300605	1.26594	-0.975711	0.0714722	-0.352873	-0.467559	-0.609695	0.277749	0.552973	0.452111	0.26417	-0.650532	-0.302056	0.438569	-0.418877	-0.349133	0.391305	-0.367379	0.0787139	0.175629	-0.735913	-0.235912	0.251098	0.399443	2.10726	-0.0420084	-0.624444	-0.389528	0.638034	0.0420089	-0.292791
SP7	-0.443647	-0.457456	-0.940089	0.551688	-0.0298977	-0.283831	0.21482	1.65564	1.44666	2.21481	-1.66912	-1.20845	-0.545175	2.16172	1.07057	1.14489	1.52019	0.210789	-0.405177	0.407537	2.6406	-0.434223	1.73609	-0.547895	-0.185517	-0.946755	-0.575916	1.2198	2.15695	0.744671	-1.23434	0.68216	-0.534098	-0.391781	1.11075	0.0833054	-0.648672	0.0298977	0.722017	-0.322293	0.930014	-0.536132	-1.09562	-0.371326	-1.3225	0.953381
PRSS33	0.353459	-0.562135	-0.984313	2.76421	1.20291	-0.389653	0.177791	4.18893	-0.324389	0.206918	0.0675778	-0.717689	0.188793	2.64566	0.0118556	-3.22307	-0.61941	4.35847	-0.0118556	2.37121	-0.644147	-0.23339	1.54617	0.777227	1.25223	-0.584802	-1.03077	-1.42543	0.960849	-0.0714178	-2.22196	0.439268	-0.116726	-0.159524	0.434632	-0.0353904	-2.62627	-0.484706	-0.622728	0.212215	1.1614	0.372713	0.167439	0.25176	-0.504006	-2.8234
CBARP	1.12337	-0.167727	-0.104918	-0.696642	-0.253906	1.24103	0.0808167	0.215322	0.578253	-0.110518	-0.834621	-0.357334	-0.600347	-1.16262	-0.244449	-1.22739	1.01819	0.499892	-0.736187	2.70094	0.876388	0.608603	-1.17151	0.549244	0.564815	-0.561762	0.745136	0.255702	1.82031	1.68349	0.544279	0.911965	-0.201184	-0.476752	-0.644214	-0.466088	1.54928	0.0838838	-1.1341	0.83811	-0.916001	-0.692657	0.550956	0.267902	-0.599962	-0.0808172
LEAP2	-0.556459	0.423545	0.956125	0.71725	-0.0292742	-0.483317	-0.94156	-0.49923	0.38675	-0.645401	-0.320031	0.0737693	-0.0445468	-0.0683482	0.5952	-0.955432	-0.0651963	0.546649	0.0120938	-0.869242	0.283118	-0.00587344	0.00587344	1.24298	-0.039212	-0.435824	1.15611	-0.354875	-0.177552	0.429291	0.550388	0.697229	-0.159224	0.516537	-0.108014	0.777059	-0.67119	0.104507	0.247259	0.495767	0.198519	0.549859	-0.683044	0.565883	-0.0452592	-0.0604689
CTCFL	-0.857498	1.09049	0.647509	-0.00348663	0.744567	-0.388935	0.869636	0.720457	-0.277127	-2.47766	-2.66477	-0.694205	-0.319781	0.549818	0.842021	0.898167	-2.95749	0.477295	0.432543	0.899569	0.684284	-2.89332	0.65532	-0.504362	1.32866	-0.067287	-2.89881	0.479889	-1.23793	0.296765	-2.08223	0.660492	-4.78667	-3.25838	-2.2955	0.00348663	0.492586	-3.53603	-0.730188	-0.406155	-0.741874	0.591009	1.59796	0.122314	-0.67173	1.0341
C4orf33	-0.100898	-0.00747061	0.842907	0.104144	-0.663176	0.004251	0.0161309	0.172459	-0.617956	-0.730673	0.000542	-1.11995	0.350076	0.405164	-1.31811	-0.311386	0.763258	-1.6954	-0.302171	-0.683469	-1.41906	-0.537627	-1.23143	1.00187	-0.508187	-0.773787	-0.179594	-1.35794	0.483731	-0.255496	0.476732	0.119895	0.258492	0.82622	0.452472	1.042	-0.793402	-0.262529	-0.0634732	0.82082	0.206411	0.845376	0.913547	0.118309	-0.000542	0.104246
TVP23C	-2.7367	-0.206215	-0.714767	-0.895725	0.0180531	-0.259725	-0.959111	-0.782199	-1.43709	-0.0180531	-0.151435	-0.0450683	0.37431	-0.860487	0.670454	-0.308717	0.210917	-0.266581	-0.084784	-0.48093	0.948367	0.597078	0.265919	0.609006	0.122684	-3.05577	0.0805678	0.0340357	-0.31898	-2.73718	0.286767	0.229954	0.406492	0.304693	0.588672	0.645139	0.187828	-0.079988	-0.336089	0.924364	0.816973	-0.108456	0.153164	0.343588	0.34194	-0.405367
RDH10	0.534855	0.77844	-0.350077	-0.578847	-0.51232	0.119911	-0.576429	0.292086	0.966897	0.852904	-0.0224354	-0.634258	-0.0197866	0.708844	-0.706682	-1.27018	0.45417	0.504054	-0.0842969	-0.245938	0.899097	-0.252647	-1.03726	1.06036	-0.0865095	0.387637	-0.445377	-0.0305417	-0.860809	1.17596	0.576878	-0.0343678	0.0197866	0.065068	0.625158	0.364846	2.35347	-0.166744	0.519386	0.460757	0.368397	0.644183	-0.0266488	-0.106884	-0.538215	-1.03182
SRSF12	-0.995803	0.0695915	0.437523	-0.86796	1.14734	0.0118327	-2.78956	-0.935002	-0.506608	1.10416	0.800221	1.20249	0.0565486	-0.474612	0.750659	-0.422167	0.604207	-2.86249	0.187089	0.600848	1.26761	-0.0118327	-0.228688	0.864874	0.30302	-0.0508518	0.654711	-2.73804	-0.0600986	-0.54085	1.09143	-0.455785	0.421507	-0.0143447	-2.56939	0.250338	-0.42692	0.108796	-2.72537	-2.44416	-0.108011	-0.0560389	1.00825	1.34447	0.580405	-1.8357
FAM71A	0.227763	0.551658	0.848192	-0.36082	-1.94018	-1.08609	0.306977	0.725486	1.41684	-0.98047	-0.806026	-0.47866	1.17187	-0.247395	-0.0784256	-0.274219	0.319542	0.304972	-1.36354	-0.717934	-0.257971	-1.04877	0.217123	0.0553186	0.387087	0.403821	0.141358	-0.24598	0.909678	-2.63763	0.136831	-0.0553186	-2.83099	0.268	-0.187658	0.64043	-0.890065	-1.17402	-1.46038	0.697451	0.105168	0.336808	0.871128	-0.381943	0.756058	-0.986479
GAPT	0.123765	-1.47266	1.15649	1.06701	1.12505	-0.885546	-0.886994	0.471271	0.0413489	-0.889883	-0.909691	-0.736997	1.03399	0.31708	-0.121105	-0.76471	-0.105952	-1.364	-0.384543	0.847845	-0.349547	0.308319	-0.653611	-0.634592	-0.313848	1.24883	1.13452	-0.790557	-0.845333	0.199375	0.785974	0.108622	-0.591574	0.730934	0.27833	0.532795	-2.15095	0.41101	-2.00396	-0.0921702	0.786798	-0.0413489	0.547124	0.842107	0.927782	-0.395215
ERICH5	-3.93377	-0.0318847	0.350275	0.163287	0.322098	-0.138428	-3.44523	-0.145838	0.00360823	-3.96616	0.739747	1.47808	0.678061	0.164908	-2.77761	-1.34135	-2.6633	-3.75007	-0.238572	1.35662	-0.969317	-2.88101	0.392901	1.07476	-0.00360823	1.06616	1.03798	1.56735	-2.11571	-0.342155	0.545534	-0.38867	-0.168964	0.774602	0.214402	1.57037	-4.41132	0.831525	-1.78194	-0.979507	0.996559	-2.19281	-0.13722	1.49461	1.61485	1.08662
CCDC185	-1.34285	0.782469	-2.38998	0.458136	0.915792	-2.00982	-2.17163	-2.91336	1.52577	-2.0714	-1.64351	0.229644	-1.81203	-1.91302	-1.7586	-1.94409	1.00012	0.404778	1.15193	1.39015	1.4507	-1.32379	-0.607624	-0.971678	-1.69121	-1.86619	-2.07747	-2.99858	-1.52372	1.26505	-1.45975	0.966458	0.440461	0.563366	1.26548	-1.15103	-0.229644	0.984675	-1.46483	2.21795	1.0326	1.38099	0.590449	1.93962	1.17171	0.783776
ENTHD1	0.803539	-0.824141	-0.239673	2.46107	-2.38926	-2.7085	-1.52906	0.971788	2.34511	-0.979003	-2.76744	2.00885	-0.309263	-1.79132	1.81249	-0.680008	-2.47208	2.96359	1.74535	2.95274	1.84777	-0.808302	-0.0423918	0.0423918	-0.29788	0.460621	2.74584	-0.704959	2.80969	-1.55145	1.60631	0.878386	0.962188	-2.8133	-2.61048	2.32484	2.17019	-0.863756	0.148815	-0.972524	2.03201	-0.216197	2.05732	2.58253	-0.0738378	-0.372023
TSSK3	0.687435	-0.248613	-1.56544	0.1799	-0.49171	-0.44452	0.934888	-0.431296	-0.0147307	0.129496	-0.693312	-0.138742	0.341327	0.635495	0.927799	0.041312	0.490919	0.708097	0.529685	0.738929	0.391552	0.260244	0.66328	-0.841073	0.0147307	0.489754	-0.357369	-0.271178	-0.985769	0.131568	-0.267791	-0.207041	-1.56368	-0.76384	0.469345	-1.16057	-1.38315	0.526762	-0.0249569	0.0944645	-0.959572	0.126247	0.0248144	-0.611009	-0.42737	-0.228209
WFDC6	-0.721923	-1.42798	0.184378	-2.90302	1.93386	-2.34413	-0.374259	1.76309	0.814754	-1.30573	0.714454	-2.10245	-0.659925	-1.94206	1.55756	-0.955591	-2.19251	1.90217	0.157981	-1.53944	-0.760378	-1.04135	0.738766	0.10515	0.94395	1.44994	0.769177	-0.833232	1.12297	0.506772	0.626789	-1.28761	0.507702	1.16208	-0.8867	-0.378336	-1.80726	0.702286	-0.771534	1.14842	-2.3252	0.196263	-0.10515	1.96509	-1.08791	1.13911
TMEM266	-2.7927	-2.43143	-0.256027	0.304708	-2.41354	-0.413734	-1.76107	-0.138603	0.0201585	-1.11816	1.59488	-1.42237	-3.17071	-1.1289	1.02537	-2.51186	0.0797222	-0.012943	-0.457892	0.584256	0.222455	0.718524	0.297714	0.556857	0.982815	0.320005	0.0408251	0.193521	-0.10707	-0.528952	1.01852	0.465707	0.129095	-0.430193	-0.0468433	0.470705	0.157542	-0.0361917	-0.305873	0.107163	0.012943	-0.453731	-0.932042	0.577196	-0.375212	0.273945
CALML6	-0.534367	-0.945165	0.85675	1.60778	1.84003	-0.128636	2.64597	1.35967	-0.83707	-0.354483	0.151523	-0.456216	1.08078	0.273495	1.68365	-0.127466	1.15696	-0.389142	1.86487	1.74978	-1.69985	0.983978	-1.0096	-0.791629	0.75654	-0.754265	2.02992	-1.39107	1.77195	-0.65522	0.042747	0.249513	-1.46321	-1.9733	-0.731226	0.37985	-1.56397	1.18712	-1.50326	1.75429	1.81941	1.16493	-0.626627	-0.535749	-0.0427465	-0.152354
NLRP5	-0.603604	0.499086	-0.974934	-0.621942	-2.18137	-0.800964	-0.915545	1.31551	-1.77784	-0.339306	-1.818	0.200049	0.579556	1.01986	1.93269	-0.678184	0.336569	0.361702	-1.8764	-0.250805	-2.53304	0.486852	-0.506907	-2.25301	0.470943	0.570854	-1.32999	1.12265	0.0591931	1.00645	0.631158	-2.04827	-2.58342	1.17158	-0.326087	1.0738	1.58471	-1.46888	0.790235	-2.06634	-0.261675	0.841814	0.0736766	-0.0591931	1.45502	1.42704
ODF4	-0.951337	2.36667	-0.00569677	0.0413885	-0.243123	1.55294	1.4618	1.35863	1.8581	0.0851255	0.615773	-0.430024	-1.07858	0.20539	0.618157	-0.98276	-0.194807	-0.0956979	1.92159	-0.591199	0.227789	-0.465066	-0.479245	0.00569677	0.58832	-0.147412	-0.812553	-0.0374494	-1.16585	0.136947	-1.57519	0.14784	0.959116	-1.45312	-1.41107	-1.26343	-0.512015	0.074326	0.072165	0.926331	0.516743	2.05395	0.593584	-0.0767012	-0.196819	-0.434664
CLEC4F	-0.292964	-0.994941	0.717747	-1.03191	-2.39634	0.387183	0.680073	-0.262515	0.0401146	-2.28322	0.601058	-0.0692794	0.956034	-0.0853989	-0.0229313	0.681493	0.928421	-0.19495	0.0229313	0.880944	-0.709922	0.342856	-1.1312	0.147636	0.453957	-0.515089	0.78007	-2.05108	0.181049	-1.88201	0.326568	0.786027	0.699597	0.0511043	0.131011	-2.93145	-2.51443	-0.961089	-0.0854328	-0.771597	-3.54096	0.12972	-0.136832	1.4472	-1.81487	0.723527
WFDC9	0.397032	-0.0651467	0.515418	-1.60104	-0.179757	0.559354	-0.647538	-0.0224583	0.643674	-0.559981	-3.3258	0.448251	-0.530869	-0.499675	0.39441	0.463211	0.619365	-1.2547	-0.329163	-0.755327	0.0344822	0.169236	-0.181504	0.821498	0.450159	-2.31492	-2.39355	-0.0193393	0.678075	0.603558	0.793121	0.543963	-1.25751	-0.000702	-1.04378	0.0697973	-0.136937	0.27052	0.153962	0.000702	-0.226829	-0.355649	-1.44423	0.48029	1.40473	0.976297
CALR3	-1.96629	-0.295185	2.81586	2.63319	0.251131	-1.23596	-0.487653	0.881019	3.14301	-0.789617	-0.567395	2.48702	0.468688	-0.294102	-0.0315375	-0.300357	-0.815464	2.06028	0.31695	-2.13197	-1.77969	2.03327	0.484947	0.12356	0.348233	-0.251152	-0.685801	-1.4432	-0.904071	-2.13689	-0.505538	0.242376	0.0315375	0.91649	0.271603	1.8793	-0.921022	-0.704378	-0.679606	1.90366	2.55776	0.763547	-0.398278	1.02636	0.947029	-0.227224
C10orf25	1.84394	0.762872	0.565443	1.71981	-1.20074	-0.343233	0.997337	-1.19966	-0.910181	0.602235	0.242431	1.43848	-0.582701	2.47708	-1.28914	0.761369	-1.92589	-2.75545	0.73283	-2.22121	1.11153	-0.279183	0.209875	-0.277346	-0.710224	-1.75153	1.92484	0.580826	-1.85531	-1.41561	-0.738999	1.12461	-0.776355	0.942354	-0.17187	-1.60749	-1.14551	0.246749	-1.94544	0.147103	-0.157522	2.17388	0.60802	1.81556	1.74683	-0.147103
KLHL10	0.700057	-0.642686	1.24474	-0.0947313	-0.197406	-0.563325	-0.462331	0.574691	0.00258637	-0.674362	2.84589	-1.01489	-0.606418	-0.102877	1.48723	-0.87466	1.77731	-0.282755	0.517183	-0.183559	-0.00258589	-0.133614	-0.461423	-0.332334	0.173299	0.150553	-0.359676	-0.607694	0.905788	-0.929272	0.143176	2.1107	1.15144	1.15397	0.489873	-0.765442	3.64685	2.41874	-1.32618	-0.408348	0.969473	-0.476843	2.28362	0.77194	0.556345	0.764459
ZNF485	1.03301	0.906292	-0.465682	-1.44154	-0.358554	0.548972	0.0178957	0.000402	-0.384883	0.709293	0.635653	0.180809	-1.22424	0.145195	0.516865	0.405039	0.67386	-0.765959	-0.0491214	0.386094	-1.01342	-1.2904	-0.114899	-0.0674372	0.522013	0.254908	-0.863608	-1.42755	0.157308	-0.633391	-1.55427	-0.56241	-0.186692	0.151816	0.15587	-1.31192	-0.0443993	-0.393935	0.0516109	0.748152	-2.01721	0.626797	0.294548	0.538192	-0.000402	-0.117469
WDR17	-2.06617	1.2585	1.3591	-1.18514	0.563672	-0.528738	0.154649	-0.0568953	-3.5318	-3.38613	-0.920471	0.181964	0.962772	1.10973	-3.96495	0.0444756	-0.860541	-0.044476	0.680057	-2.18228	1.74413	-0.804407	0.334387	0.755537	0.911273	-0.77548	-2.81538	0.976357	-2.49916	-0.328476	0.269001	0.76297	0.0479546	1.5481	-1.91191	-0.115753	0.525275	0.799643	-3.88535	-2.52299	0.122945	-0.382319	1.35688	-1.5377	1.55486	-1.54518
MFSD6L	-0.437209	-0.468595	-0.176657	0.930381	-0.673337	0.856774	0.695287	-0.911172	0.603197	-0.417902	0.236072	0.651441	0.622188	-0.0327492	-0.129955	-0.00115204	-1.0763	-0.375524	-0.0303926	-0.571012	-0.315475	0.107434	0.111522	-0.52072	-0.143594	-0.24917	1.06485	-0.0744019	0.390853	-0.377579	1.94153	0.686386	-0.135804	0.416861	0.0116868	0.294956	0.714617	-0.252027	0.0973206	0.492186	0.0587139	-0.00203037	0.00115156	1.03858	-0.312663	1.3114
ESX1	1.00599	0.313408	-2.52911	-0.272543	-0.006639	-1.76037	0.456362	0.197807	1.82384	-1.34143	-1.75945	-0.361276	0.310104	0.519856	-0.149539	-0.19313	1.6699	-1.1504	0.670123	-1.03412	0.0914321	1.22857	-2.44166	1.35655	0.503845	-0.103744	-1.46217	0.462405	0.769767	0.98083	-1.37899	-0.879092	-0.0100913	-1.38003	0.00663853	-0.268459	1.69993	0.668191	1.12684	-1.96717	0.680329	-0.965225	-0.0399122	0.891081	0.444156	-0.216543
FAM167A-AS1	-1.71901	-1.15061	-0.530565	-0.634031	1.30235	0.684277	-2.06779	0.75437	1.83954	0.389905	0.988042	2.7831	0.25492	-1.44122	-1.45702	0.54393	-0.93751	-0.945416	0.294486	-1.51179	1.13748	0.368655	-0.902158	-1.93644	-0.419462	0.342223	0.345285	-0.894646	-0.885025	1.49829	1.5391	-2.25679	-0.25492	-0.447045	-0.295274	1.11873	-1.63743	0.7672	-1.83008	1.19062	-0.639956	0.383009	-0.765263	0.665713	0.995098	1.66663
DNAJC5G	0.0869346	0.944296	-1.84614	0.0293293	-1.47437	-0.22017	-0.0891371	-1.6749	-1.15419	-0.00741672	-1.32739	-0.30978	-1.05772	0.385789	1.01462	0.422583	0.932348	-0.0853715	-1.83089	-0.536359	1.42341	0.263012	-1.35115	1.02621	-0.242322	-1.44355	1.01836	1.07486	-1.64292	0.477301	1.23446	0.152228	-0.334934	-1.41025	-0.331619	-1.55554	0.621257	-0.0792561	0.00741672	0.82891	0.595428	0.0155044	0.804372	1.68924	0.361777	-0.055383
WDR88	0.379492	0.52529	-0.506746	-0.218435	-0.279952	-1.19597	1.21161	1.51141	0.0301704	-0.892665	0.552622	-0.125203	0.183778	0.579435	-0.32632	-1.04848	-0.340776	-0.758357	-0.53929	0.67125	-0.329793	0.564654	-0.325948	-0.116536	-0.293529	-0.722712	-0.948905	1.56243	0.0778832	-0.770097	-0.132608	0.0695815	0.138115	0.420627	0.571311	-0.918609	-0.0571508	1.33196	-0.0301704	1.61471	1.31856	-0.315289	1.01065	1.46607	0.31604	0.841867
MBD3L2	-1.14133	-0.558433	-0.616927	-1.26378	-0.570472	-0.777802	-0.587196	0.150157	0.313586	1.44139	-0.0271373	-0.960646	-0.79101	2.31422	1.79761	-0.829228	0.548082	-0.0360446	-0.372232	-0.508959	1.04611	0.382245	-0.528662	-0.774466	-0.176274	0.923015	-1.55082	-0.0145249	0.123958	-0.772822	-0.525242	-0.0844812	-0.126103	0.610574	1.81383	2.96344	1.22126	0.893025	1.20258	2.53394	0.236983	0.758274	2.42132	0.578584	0.560927	0.0145249
ADAMTSL1	-1.2748	2.98072	-0.452518	-0.631375	2.32323	-0.215839	0.304861	-0.138206	-0.172768	-0.649645	0.00904512	1.09798	0.973834	-0.0777082	1.99436	0.174887	-1.1803	-1.00428	1.06422	-1.78209	1.33653	-0.0090456	0.512201	0.33075	0.291154	-0.575081	-0.283717	-0.103287	0.262856	-0.665369	3.38431	1.35547	-0.753458	-1.37707	-0.685514	0.317277	-1.33547	-0.269533	0.649215	1.3848	2.39016	-0.392657	-0.147457	1.55193	0.12841	0.129253
MBD3L1	2.10888	-0.198655	-0.315381	1.1635	0.17729	-0.00807953	0.790824	-0.923613	1.61575	-1.514	-0.352233	0.889689	0.602275	-0.372131	1.21991	1.63217	0.25071	-0.673238	0.663684	-0.285814	-0.122976	0.335131	-0.48834	-0.127981	2.77476	-0.168991	0.0502787	-0.720438	-1.10413	0.332789	-0.81708	-1.3851	0.770931	-0.620741	-0.7718	-1.4099	0.350018	-0.842621	1.07207	2.27829	-0.774411	-0.739693	0.0633159	0.00808001	1.30112	1.94888
TENT5D	-3.28278	-0.148413	-0.887002	0.622593	0.243217	-4.18387	-2.32096	0.816416	0.43527	-0.791842	-2.56543	-1.30578	1.48239	0.854551	0.49219	0.181511	-1.099	0.269188	-4.21547	-1.75137	0.384258	-0.713708	0.0581174	0.210016	0.890248	0.728103	0.595216	-0.679223	-1.17219	0.363627	-2.30532	-1.98389	0.610832	0.208108	0.761624	-1.00562	-0.0581174	0.603963	0.237293	0.510432	-0.0587635	-3.37964	-1.74411	0.426348	-0.195367	-0.198915
SERPINB11	0.509567	0.297936	0.233681	1.3558	-0.775134	-3.15052	0.500214	-0.473526	1.50285	0.220124	-1.37401	0.0371966	-0.491671	-0.469163	0.311699	0.500639	0.933742	0.75594	0.0816636	0.3368	0.0326948	0.518818	0.882848	0.566223	-0.502312	-0.742942	-1.45397	-0.319413	-0.861482	-0.562654	-0.774011	0.518163	-1.13959	-1.73414	0.642075	-0.404208	1.32988	-0.0326948	0.280339	-0.117939	-0.0712504	-2.08521	-0.133505	-2.49675	1.54162	-0.436418
DSCR10	0.796987	-1.63202	0.996091	0.0136089	-0.0136089	0.491148	-0.0908303	-0.627722	2.17227	1.18393	-0.391346	-0.590587	-1.90273	2.2235	-0.553238	-0.780832	-0.129738	1.68542	1.43206	-0.261704	0.860924	-0.886963	-0.219836	0.0639563	1.38049	0.448049	1.27605	-1.44661	-2.4819	2.06593	-2.19637	0.51795	1.13344	-0.380017	1.13178	0.20223	2.17577	0.932077	1.46165	-0.912079	-0.116474	-2.17522	-0.953762	1.8012	-0.941642	-2.10565
IRF6	0.168214	-0.89821	-0.0510454	-0.550804	-1.08036	0.203228	0.0421429	0.531071	-0.240445	-0.14404	-0.00102997	-1.34834	-0.560563	0.539121	-0.442928	0.0032959	0.40016	-0.143955	-0.333669	-0.0492563	-1.34526	-0.613782	-0.658853	1.06605	-0.420639	0.107368	-0.220391	-0.613272	0.322967	0.524254	1.02784	0.799512	1.09777	0.645244	0.658553	1.0029	1.38068	0.569851	0.683996	1.10828	1.12025	-0.735251	-0.144762	-0.257517	-0.639117	0.00102997
RAPH1	-1.13469	1.08672	-0.58301	0.516465	0.529034	-0.495041	1.31752	-0.338736	0.0351317	0.579791	-0.0351317	-0.408017	0.506075	0.113891	0.0454381	0.584247	-0.0908811	0.824567	0.147625	-0.39312	0.880785	0.801319	1.05927	-0.41973	-0.541859	-0.431837	0.0669682	0.171496	-0.15738	-1.93638	-0.209458	-1.01251	-0.258221	-0.262237	0.0562346	-0.175036	-0.279952	-0.053416	0.108926	-1.04749	-0.749557	0.0427897	-0.720391	0.933932	0.765471	0.842305
SMCR8	-1.02377	-0.692847	-0.957105	-0.539529	0.0121181	-1.42297	-0.848427	0.939655	-0.166693	1.36216	-0.274536	-2.42264	-1.65229	0.911938	-0.91031	1.54683	1.01771	-1.30222	-0.353376	0.698616	-0.0121181	0.185214	-0.752869	-0.425926	1.06082	-0.188821	0.611692	-0.349293	0.0465586	1.57578	1.76596	0.19308	1.34497	0.0210931	2.59675	-0.238829	1.57282	0.128517	1.55221	1.13213	-0.243056	-0.857064	-0.368132	-0.330499	0.986248	0.655034
LACTB	0.126118	-0.464129	0.0688024	-0.243953	-0.445588	-0.0609965	0.611915	-0.552997	0.0683284	-0.452767	0.210471	-0.158998	0.294817	0.590279	-0.477324	0.429459	-0.578058	-0.152361	-0.383908	-0.259667	0.0331302	-0.0981879	-0.0294576	-0.0266614	0.0294585	-0.017983	0.321791	-0.174534	-0.356898	-0.00707579	0.656315	0.0412745	0.460453	0.696902	-0.188653	0.164511	0.55376	0.299253	0.174262	0.412465	0.350585	-0.330167	-0.183005	-0.0182171	0.0118589	0.00707579
BNC1	1.12871	-1.28591	-1.1044	2.30492	2.0551	1.19396	-1.72875	-1.06387	5.83733	-0.43939	-1.19932	-0.569526	-0.314722	0.110836	1.03439	1.19711	-1.69399	2.21626	-1.75226	0.0454783	-0.137582	-1.47799	2.71948	0.896484	0.600573	1.83426	3.16754	-1.91978	-0.957233	-0.731399	1.60822	-1.82259	-1.85734	2.44099	3.33995	-1.86618	1.87315	-0.223759	-1.80695	-1.28022	-0.537535	-0.0454788	0.201414	0.540701	0.238073	0.533221
AFG1L	0.243558	0.0118444	0.0875585	-0.17009	-0.669804	0.650297	0.113942	-0.737455	0.665073	-0.739914	-1.20963	0.085129	0.0230319	0.0127041	-1.18326	0.136301	0.859333	-2.14479	-0.27323	0.465663	0.297662	0.405994	-0.322027	-1.12431	-0.372643	-0.419662	-0.744152	0.0777404	0.614571	0.209001	0.0815642	0.356301	-0.550785	-0.00989556	-1.00296	-0.31239	-1.55133	-0.937331	0.551961	0.0195353	-0.00579715	0.832042	-0.128146	-0.64927	-0.517755	0.00579715
IDI2	0.537343	-0.218763	-0.101153	-1.27702	-1.00103	1.58202	-0.568516	-0.684072	0.530783	-0.0326166	1.73834	0.907604	-0.536004	-0.420775	-0.595093	-0.612094	-0.220074	-0.209943	2.0931	0.955424	0.235316	1.31481	-0.599147	1.88418	1.63334	-1.05393	-0.430392	1.67355	-1.36318	0.680562	1.8057	-0.188876	-0.70731	-1.60085	-0.415077	-0.162767	2.54021	0.520233	2.20859	-0.124351	1.93535	1.00278	2.81938	0.0326171	0.408202	1.78325
CYP11B1	-1.26375	1.97458	0.250616	1.07697	2.44953	0.649043	0.66499	-0.53424	-0.4355	-1.1701	0.323498	1.8672	-0.451021	0.0175238	-0.0175242	-0.970064	0.732608	-0.0624437	-0.0622292	-0.966651	0.607952	-1.72667	-0.27436	0.388833	0.226021	-0.0857344	-0.832029	-0.774014	2.99477	0.216524	1.80233	0.211286	0.0447602	-1.00867	-0.79742	0.68126	-0.249411	0.890472	-0.634588	-0.551477	-0.299204	-0.248284	-0.223847	0.239712	0.397322	0.285587
TAF8	1.77671	1.12138	-0.665964	-1.63876	1.08191	0.237069	-0.27481	-0.339437	0.901205	-0.199323	-1.03284	0.530387	0.939867	-0.493015	-0.345272	-1.35469	0.408679	-0.302853	1.83377	0.353381	1.46309	-1.18207	1.48056	0.923249	1.31822	0.0474329	0.0228701	-1.15442	-0.785287	-0.46113	0.849182	1.22663	-0.975683	-0.0268221	-1.59591	-0.444637	1.86996	1.94494	-0.670566	-1.59315	1.07107	-1.91389	-0.109504	-0.0228701	1.37739	0.771845
SLAMF6	-0.797367	0.0209577	0.518839	0.325605	-0.583113	-1.08169	0.416072	0.216193	0.763384	-0.912148	-0.686857	-0.539258	0.535948	0.406601	0.21206	-0.484932	-1.30665	-0.605826	-0.198981	-0.101238	1.05021	0.274412	-0.0257862	0.499811	-0.0340989	1.19441	-0.146797	-0.959232	0.284034	-0.173653	0.615843	-0.112775	-0.397145	0.484267	0.297737	0.341446	-0.85232	0.958021	-0.450748	0.431447	0.642077	-0.48715	-0.654127	0.780897	0.520613	-0.0209577
ZSCAN20	-0.153538	0.630387	-0.47202	-0.835934	0.390343	-0.207738	0.262547	0.56803	-1.13439	-0.813869	0.502782	0.0246961	-0.866044	0.320096	-2.27316	0.0203316	0.114267	-0.233747	-0.53485	-0.0356362	-0.0542328	-3.08264	0.373636	0.888254	0.939925	-1.75144	-0.107317	0.655559	0.314924	-0.0203316	-0.156584	1.05282	-0.703875	0.607163	-0.866303	0.851177	0.567436	-0.650666	0.0592887	0.875046	-0.331991	0.13708	0.467082	-0.830653	-0.274927	0.958476
GPBAR1	0.559185	-0.0828157	0.0954547	0.391381	0.0803533	0.575197	0.368144	-0.16772	-0.0127745	-2.10406	-2.88247	-0.480762	1.26274	-0.397669	-0.696894	0.466546	0.0492573	-0.798969	0.301863	1.40483	-0.966585	0.20452	-0.97391	0.374823	0.929984	-0.324478	0.788967	0.0519934	-0.0340133	0.612383	0.713997	-0.17626	0.487973	0.900042	-2.74983	-2.02338	-3.22782	0.0127745	-0.0203514	-1.90679	-1.59376	-2.45326	0.528608	-2.0203	0.62659	-1.2674
RHBDL2	0.339869	-2.30716	0.964886	1.5396	-2.8175	-0.718384	-2.05685	-0.0283904	0.279943	-2.98274	-1.91207	-2.23496	1.28667	0.886829	-2.23452	0.298056	-1.57287	-2.81133	-0.522202	-0.804367	-2.23021	-0.188808	-2.33001	0.763901	-1.37409	-1.08537	1.33296	-3.03251	0.0283904	-0.85086	1.64134	0.456859	0.430113	1.29379	0.0467648	1.34569	-0.822715	1.25176	0.409977	0.859404	0.491372	-2.63103	-2.73295	0.528178	0.186491	0.575991
BRSK1	0.0498879	-1.43927	-0.354372	-0.969259	-0.211706	-0.0318716	0.923028	0.725011	-0.697647	-0.579038	0.0275662	-0.434301	-0.426023	0.216109	0.500852	-1.25766	0.357044	0.762564	0.349164	-1.6893	-0.326347	-1.79685	0.110063	1.12713	0.0431855	-0.766077	-0.0235441	-0.453715	0.730741	0.0903361	0.50517	0.114507	0.6398	-0.105776	0.110329	0.213406	-3.02217	0.848365	-0.153028	-1.2309	0.4588	0.00992131	0.373735	-0.00992131	-0.492955	-0.923983
CRB2	-0.148046	0.0248873	0.103157	-0.164763	-2.59222	0.502472	0.42241	0.962497	0.944706	1.36615	0.328855	-2.68589	-2.77048	-2.45355	-0.384504	-2.00833	0.963707	-0.406949	-3.88196	-1.49909	-3.76156	-0.784694	-0.112013	0.0265529	-0.412178	-1.44045	-0.453777	-2.54989	0.86569	0.915582	0.462447	0.0902031	0.399101	-0.338231	0.161248	0.952501	-0.207731	0.809891	-0.0248873	-2.02079	1.15169	0.288472	0.241118	1.2508	-1.9412	0.174782
WBP2NL	0.977802	-0.973321	-2.31848	0.153972	1.23191	-2.03043	1.12764	0.0629873	-1.09028	-0.529025	0.635527	-0.0629868	0.869074	0.868386	1.16233	-1.9636	0.586959	-1.89043	0.496072	-1.29939	-1.63104	0.295147	-0.347778	1.62251	-2.71545	-2.7771	-0.0991516	-1.34659	-3.45966	-0.29577	0.582219	0.517594	0.880762	-1.23485	2.35505	1.26198	0.582228	-2.64606	-0.942435	1.49996	-3.06675	0.255045	-0.14357	1.82205	-2.17462	1.42242
ACVR1C	-1.86545	-2.13129	0.940357	1.34845	-0.0432611	-0.144632	0.870472	-1.56454	0.0776477	1.34514	-1.41366	0.308815	0.409703	0.601429	1.07567	-2.98508	0.436403	-2.91863	1.02968	1.1992	-0.027081	-1.3219	-1.14815	0.221632	-2.32282	1.21098	0.561115	-2.47197	0.77664	-0.5798	-0.388869	-0.273728	-0.236598	0.027081	-0.092113	0.797607	-0.435712	-1.0333	0.0585656	-0.0958896	0.329651	1.74609	-0.75062	0.50926	-0.347835	1.05222
TMEM74	-0.137715	-0.17443	-0.734496	-0.125284	0.350207	0.00103474	0.386479	-0.62319	0.673772	-1.78867	0.164449	-0.0200019	0.366057	0.111837	-0.217532	-0.132205	-0.746274	-0.21833	0.192103	0.668892	-0.512289	-0.118556	-0.895873	0.279682	0.896386	-0.43205	0.799178	0.946176	-1.45227	0.808798	0.417516	0.238527	0.133416	-0.378695	-0.00103474	-0.0686984	2.26967	-0.0140834	-0.197899	-0.22165	0.462332	0.592931	0.441759	0.545476	-0.923896	0.210086
TIGD4	-0.319225	0.0838254	-0.195208	-0.136	0.524758	0.536973	-0.52967	-0.361178	-0.535536	0.790055	0.576277	0.552028	0.00754523	-2.65409	0.860854	-0.42983	-4.01002	-2.21467	-2.34899	0.436637	-2.21739	-1.34177	-0.389066	0.391244	0.453927	-0.139114	-0.550307	-0.0417473	0.161344	-0.152318	-0.241684	-1.87044	-0.00754523	0.2999	0.246359	-0.231475	0.301197	-1.3386	0.464124	0.4739	0.493075	0.613068	0.155637	1.10771	0.721427	0.235593
ART5	0.426736	0.209911	0.668301	-0.172713	-0.108274	-0.0363507	0.628954	-0.137326	-0.609731	-0.682381	-1.11535	0.258104	-0.0235677	-0.241106	0.89972	-0.0676293	-0.391866	0.0235677	-0.496449	-0.928228	1.90868	0.172303	0.0808425	0.715869	-0.226199	-0.641961	-0.424046	-0.258599	1.09187	0.321671	1.29398	0.404042	-0.477503	-0.375487	0.548994	0.525543	0.653211	-0.348328	0.132184	0.310207	-0.428307	0.456171	0.69863	-0.0353136	0.669678	-0.222488
FAM71C	-0.969695	0.0732126	-0.253146	0.123112	0.232065	-0.563596	-0.307272	0.875627	0.471864	0.279025	-0.00529003	-0.456415	-0.684737	0.00887728	1.13426	-0.516773	0.00529051	0.378566	-0.0226917	-1.22324	1.88678	-0.774083	0.692781	0.629542	0.495057	-0.511097	2.19365	-0.964851	-0.445119	0.308922	-1.00233	0.314547	-0.696578	-0.15131	0.585829	-0.766652	-1.09744	-0.112983	-0.068613	2.03838	2.35029	0.608414	-0.411914	0.631371	0.342001	-0.0840354
LINC01547	1.62752	0.0283256	-0.217474	-1.22331	-1.47705	-1.0347	-0.509491	0.258371	-0.128048	-0.314331	1.9459	1.1988	-0.0314875	1.28778	-0.247074	2.30633	1.15707	-0.332201	-0.298891	-0.224107	1.71479	-0.921398	0.958851	1.76737	1.8969	-0.733233	-1.46999	0.340011	0.544095	-0.527121	0.111286	-0.455623	-1.35477	-1.24931	0.372639	1.08958	1.4873	0.759777	1.47762	0.225826	1.24654	-1.39852	-0.0643811	-1.7023	0.074034	-0.0283256
NLRP11	-0.117709	1.155	0.670351	1.35628	-2.4002	-1.3134	0.854614	-2.50142	1.88094	0.519074	-1.80226	-2.10832	1.09061	-2.52274	-1.4455	2.30279	-0.0123243	-0.892787	0.158308	1.05206	0.457831	-0.0516009	0.199738	-2.74668	1.13536	0.585998	0.937264	-3.46859	-2.92391	1.71531	1.43333	0.0123243	-2.43097	-1.63835	1.02265	-2.40722	1.00163	0.620912	-3.23663	-2.60946	-0.759304	-1.9871	0.328893	-2.21765	0.79525	-2.22513
KIF6	0.0479975	0.0178385	1.18962	2.93945	0.255664	-1.90603	-1.32976	-0.017838	0.625295	-0.421426	-1.14816	1.31848	1.20594	-0.472159	0.249425	1.62639	-0.721255	-1.40188	-1.5412	0.528618	-0.783016	-1.48974	-0.89884	2.19568	-1.35928	1.515	0.0332642	-0.202514	-1.13759	0.625064	0.714003	0.746231	-0.834899	1.65776	-0.592375	-0.784263	1.00534	-0.901973	0.448081	-0.212346	1.93362	0.104284	-0.727241	-0.36329	2.78408	-0.395434
IQCD	-0.456125	1.08804	0.947356	-1.85678	0.00125694	0.102982	0.80793	-2.77122	0.974417	0.2766	0.0453343	-0.798627	1.21601	-0.826516	-0.215427	-0.157708	0.359691	0.360493	-0.00125694	0.350353	0.227593	0.485475	-0.20192	0.761615	-3.31192	-2.70901	-3.1824	0.0211582	-0.563763	0.41801	-0.518841	-0.344786	0.589352	-0.782482	0.0897446	-1.89432	-0.764939	-0.133281	-0.00381708	0.432686	-1.84086	0.516967	-0.432817	0.118258	1.06231	-0.0267458
STON2	-0.378215	-0.0280035	-1.06627	-0.695652	-0.0927517	-0.202239	0.90813	0.543503	0.53339	1.37579	-0.0501692	-0.677826	0.0772932	0.40432	0.991994	-0.780263	-0.400593	0.373113	-0.200104	0.846788	-1.24907	-0.133162	0.273654	0.852314	0.927108	0.0648296	-0.380607	0.187675	-0.727665	-0.102636	0.750634	0.166913	0.202771	0.477297	0.098748	-0.0774877	0.568571	-0.26719	-0.729716	-0.670355	0.0280035	-0.165548	0.987337	0.553833	-0.740797	-0.264709
SERPINA12	0.316169	0.710827	-0.401881	-0.0496497	0.0629721	-0.379269	0.760056	0.125163	1.27821	-0.927537	-2.1382	0.29487	-3.14084	-2.49992	1.12575	-0.000375	-0.39778	-0.0438709	0.000375	-2.21048	-0.780643	-0.738733	-0.05445	-1.45678	-0.116834	-0.388591	-1.78973	0.306599	0.68641	0.543372	0.139914	0.760608	0.81627	0.264534	-2.58424	-2.44823	-0.0821862	0.12851	-0.0646706	0.848362	0.571583	-0.649504	0.709108	1.03329	0.790947	0.360863
LETM2	-0.865715	0.468093	-0.261006	-0.195096	0.658705	-0.368469	1.58259	0.840835	0.988469	-0.45228	0.078016	-0.026983	0.026983	-0.229373	-0.0460393	0.0538199	0.208857	-0.107577	-0.164838	0.59473	1.61487	0.36807	-0.472074	0.122773	0.395235	0.393858	0.123998	-0.946938	0.539074	1.47165	-0.627289	2.05029	-1.46485	-0.175428	-1.00941	0.103544	-0.0967281	-0.170989	-0.428105	-0.0965102	-0.891702	-0.638582	0.964095	0.665153	0.0828259	-0.317086
BSND	-1.65482	1.46584	1.46828	0.00423336	0.320566	-1.28821	0.177913	0.854308	1.10088	-0.158368	-1.04976	-1.46354	-0.525158	-0.480856	2.10084	0.278013	0.607903	-0.265846	0.858904	0.805287	1.22605	1.35628	-0.397812	-1.23717	-0.239117	-0.369507	-0.811165	-0.0869651	-0.313925	-1.35795	0.318168	-0.651136	0.761585	-0.885678	0.654161	0.661888	-0.663716	-0.984616	0.781262	1.46378	-0.629343	1.40659	0.591251	-0.0042336	-0.12331	1.94758
CLEC4C	-0.547028	-1.72102	0.196688	-2.99575	0.632934	-4.41755	0.939591	-0.146612	0.0766869	0.0970759	0.895641	0.252987	-0.152615	0.461303	0.759532	0.0353913	0.345192	-2.19285	-3.18695	0.357842	-0.0353913	0.167961	-1.33727	0.244617	0.437938	0.156869	-0.123714	-0.191839	0.655594	-0.549489	0.177847	-1.7246	-2.94253	-0.537236	-0.244928	-1.58741	-0.613589	0.33491	-0.340659	1.24345	-0.264087	0.87188	-0.483052	-0.317821	0.567789	1.09991
NLRC4	-0.0408435	0.665253	0.818925	0.34856	0.811603	0.0859837	-0.416058	-1.14132	1.15948	-3.15168	-0.195906	0.619893	1.02878	0.566588	-0.748023	-0.82782	-0.425123	0.399675	0.0408435	-0.579636	0.569363	0.659549	0.795473	0.125472	0.673662	-0.0523524	1.65279	0.751361	0.547347	0.499091	-1.52093	0.380636	-0.45565	0.166887	-0.527752	-0.162674	-0.567211	-0.867338	-0.797803	0.553613	-0.852441	-0.637839	-1.05676	-0.589189	-0.749891	-1.14381
PRSS36	-0.285713	0.0864568	-0.0814357	0.401041	0.101429	-0.607085	0.892225	-0.749899	0.777867	-1.24355	-0.794086	-0.339983	-0.0246906	-0.0108738	0.136979	0.187726	-0.178956	0.0301189	0.0893889	-0.0143065	-2.37261	0.0652218	-0.229857	0.674453	-0.320494	-0.0722961	-0.509067	0.400698	0.177483	-1.05903	0.470327	1.90995	-0.221899	0.413153	0.0248494	0.18681	-0.457789	0.0956607	0.469372	-0.0685849	0.591938	-0.0805874	0.400167	-1.60937	-0.0604839	0.0108738
ZDHHC15	-0.123299	0.492141	0.53333	-0.583077	0.149376	-1.4642	-1.38263	-1.26268	1.48795	-0.565425	0.55217	0.543905	0.791108	0.456897	0.576412	0.447115	0.832849	0.750615	0.00431299	-0.037848	0.306911	0.87298	0.296025	-1.03063	0.510287	-0.00431299	0.994904	0.218136	0.585006	1.14254	-2.08865	-0.703725	-0.302564	0.621712	-2.34375	-0.255188	-0.886459	-0.631139	-2.99824	-0.783691	-0.464301	-1.98874	-0.905293	-2.76448	0.753599	-1.61867
NUDT9P1	-2.13653	-4.81522	0.917828	1.01715	0.871396	-0.153628	0.252498	0.186475	0.930181	-1.12438	0.466494	0.260012	0.614273	0.55511	0.459285	0.857992	-0.189951	-0.0382543	0.46832	-2.90818	0.344327	-3.12944	0.171453	1.0642	0.744441	0.187657	0.647048	-2.7927	0.0627255	-2.17138	-2.93183	-0.086338	-3.12131	-1.12766	-1.58034	-1.7766	-3.51355	-1.38924	-3.57205	0.310462	-0.503121	-1.37143	-1.09363	-2.60828	0.038254	0.754504
BTBD16	-0.57015	-0.49539	-0.145645	1.15417	0.932361	-1.23155	0.318068	1.27058	-0.0914621	-1.14924	-0.651339	-1.01327	-0.462331	2.20092	0.435161	-0.384048	0.9974	-0.0728383	1.00466	0.621167	0.485646	0.121047	-0.818993	2.35759	-0.0159345	1.22584	-0.974311	-0.192681	2.0948	-0.535284	-0.862305	1.48343	-0.0747027	-0.700409	2.90192	0.00449944	-0.344826	3.69493	-0.00449944	3.97856	2.2824	-1.04535	-0.0778818	0.261405	0.531775	0.253925
RTP3	-0.841144	-0.141531	3.66937	-0.318058	3.79376	-0.998526	2.12111	3.06496	-0.060071	-0.75983	-0.833882	-0.654832	-1.01336	1.04066	0.877802	0.060071	-0.732563	0.638017	-0.361348	-0.479314	-0.336847	4.36659	-0.339866	0.247879	-0.233997	1.57978	-0.404333	0.0785871	-0.255212	4.06029	2.59863	2.23377	0.242098	1.22964	3.55142	-0.874985	-1.28335	0.986213	-0.392124	-0.64922	-0.751921	-0.677387	1.24744	2.92893	2.91123	0.275071
ALMS1P1	-1.3038	-1.93584	0.569622	-1.22509	0.655129	0.995134	-0.499149	1.13887	1.87589	0.0105591	-1.35119	0.887269	1.43402	-0.939292	-0.0812044	0.945308	1.43607	-1.71927	-0.0105591	0.0916905	-0.055799	0.501976	0.928772	-2.13842	0.713958	0.996544	0.429065	-1.26927	0.971233	-1.12908	-1.62741	-3.11783	-1.62269	0.760521	-2.9354	-0.0906105	-1.89216	-1.35541	-1.03473	-0.913026	0.893499	-0.798655	0.904773	0.391474	0.228463	0.831112
ADAM21	0.146883	-0.237667	-1.50221	0.458657	-0.978168	-0.882772	-0.687335	-1.99114	2.16214	-2.04839	0.711877	-2.36739	1.75976	-1.21071	2.43176	-1.12557	-0.71954	0.0329485	-1.33438	-0.997984	0.0858154	-1.49386	1.36038	0.831876	1.5483	-1.48353	0.676846	-1.26138	1.94046	-1.71441	1.76259	2.09905	1.84722	1.56619	-1.34662	0.0717487	0.859559	1.01341	1.85255	-0.672583	-1.31621	-0.722974	0.855608	-0.032948	-0.631691	1.31818
TRIML2	-0.118546	2.55059	3.18503	1.28521	0.010736	1.1487	2.20733	1.39578	0.670691	-1.57042	-1.05035	0.171501	-0.16375	1.85402	-0.664837	0.255039	-1.13527	1.62594	-0.324904	2.42651	1.51	-1.35157	0.363847	-0.824909	-0.74509	-0.906837	-0.844912	3.02064	-0.0692148	-0.371807	0.400363	3.39632	-1.2733	1.62052	-0.55862	1.40314	-0.845365	-0.631715	-0.980194	2.32109	-1.28846	2.95564	-0.101037	2.53964	-0.0107365	-0.384117
IL12RB1	-0.0978272	-0.81263	0.998578	0.626682	0.578787	0.485937	-0.228991	0.552097	-0.00228047	-0.169127	0.19845	1.22307	0.973009	0.461575	-0.123134	-0.514675	-1.5133	0.870646	0.528422	0.406149	1.53805	0.197499	0.837562	-0.243848	0.135028	0.305143	0.250119	-0.196823	-0.398915	-0.758517	-0.395943	-1.49324	-0.666402	1.10132	0.39333	-0.0984218	-0.463197	-0.263159	-0.92622	-1.1274	0.164313	-1.34545	-0.288899	0.00228047	1.06195	-0.253442
GTF2A1L	-0.505448	-0.144089	-1.33177	1.19309	0.088603	-0.179543	-0.267766	-4.72072	1.31464	-1.88235	0.0666671	0.152319	0.00491285	0.0869894	-2.13387	-0.3488	-0.00491238	0.122635	-0.160811	0.0849156	0.0209784	-1.52535	0.98012	-0.0280471	0.281913	-1.44844	-0.0999532	0.879558	0.400019	0.943159	-0.534949	-0.815784	0.624251	0.966282	0.623767	-0.559123	0.834794	-2.14581	1.04084	-0.700151	0.47149	0.25589	-2.23089	-0.485044	-1.86881	0.155684
TRPV3	0.160757	-0.221248	-0.451706	1.37348	-0.938529	-0.635862	-0.190478	0.355591	0.891756	-1.46902	-2.30807	-2.32675	0.158111	-2.54359	0.472098	-0.734006	0.0609341	-1.30394	-0.219185	-0.203809	0.0657182	-0.143498	-0.317927	0.644079	0.291553	0.342136	-2.1864	0.299917	-0.12029	-0.076611	0.601477	-2.15898	-0.209698	0.829718	0.515444	0.455393	-0.786883	-0.0393949	-0.652921	0.068295	0.0393949	0.39548	0.545312	0.371417	0.624332	0.54279
CNBD1	-0.973599	2.73205	-0.134742	1.53433	-0.349084	-2.54785	-0.0386581	0.214828	3.01785	-2.49918	-1.56267	-1.46389	-1.07023	3.11703	0.114449	-0.549384	-0.692952	1.50608	-0.844143	0.0523477	0.603136	1.09969	2.16181	1.60966	-1.25992	-0.981758	1.37622	0.0386577	2.11773	-0.603783	0.689398	-2.20343	-0.868808	-1.19456	1.19162	2.32558	-1.93708	-0.345796	2.07945	1.90597	-1.13984	0.495708	1.60094	-0.152627	1.00252	-0.160108
MMP21	-0.681004	-0.0202646	2.06217	-2.61956	-1.44357	0.38687	-0.188143	-1.69425	2.74354	-1.32636	1.34492	-0.680186	-0.449234	1.43621	3.3025	-0.798837	-1.31044	-1.75398	-0.812438	0.0202646	0.138669	2.52281	1.05713	2.57619	2.40925	-2.6003	0.99332	2.58773	-1.41885	1.79329	1.42956	-0.208207	-1.5169	1.82428	-1.76981	2.71036	1.06435	2.15551	2.63927	-1.14078	-0.748974	1.85809	-0.75693	0.49495	-0.0441351	-0.248516
TMEM190	-1.00649	1.53934	1.33407	-1.04436	1.96665	0.517172	-0.380219	-1.61587	1.28254	-0.786646	0.363334	-0.937375	-0.529052	1.7561	1.8993	-0.252186	1.38087	-1.12111	-0.918779	0.721083	0.23871	0.0321946	1.04077	1.61463	-0.0321946	-1.8681	-0.328342	0.423381	-1.38046	0.977066	0.431352	-2.06824	0.689932	1.18398	-0.960206	-2.0975	-2.31561	0.720166	-2.05596	-1.48893	-2.76884	1.38526	1.46224	-0.553266	0.988711	-0.413514
GAS2L2	0.360606	0.28529	1.77492	-0.437675	1.4355	-0.731606	0.125705	1.34374	2.37926	-1.11649	-0.561111	-0.511575	2.23596	-0.0924721	-0.0130067	-0.183688	0.560642	-0.82368	1.37396	1.56014	1.98869	1.75039	-0.131432	-0.225278	-0.0559311	0.537675	1.98056	0.283776	0.717371	-0.537778	1.58451	-0.240124	-0.400707	-0.156296	-0.625421	-0.48912	-0.630065	-0.327558	1.59389	0.0130067	-1.1098	2.27068	-0.344183	1.57195	0.98665	-0.301563
KCNG4	-0.993363	1.74703	-1.28182	1.23056	0.598328	0.659796	1.42888	0.994355	2.0189	1.41637	-1.09471	0.644262	0.371945	0.0219703	2.12101	-2.09528	-1.50161	1.07555	1.5985	0.0272512	1.20171	-0.596775	-1.41119	-0.0219703	-0.185945	0.278087	-0.549943	1.14334	-1.57753	-0.552404	1.20302	0.506468	-0.710865	-1.87045	-0.820128	-2.44726	-1.74912	-0.80742	-0.182598	0.485023	-1.52621	-1.27718	-1.57272	-0.410149	1.47245	1.14854
PXT1	0.393826	-2.88257	-2.10847	0.398425	0.998311	-2.42163	0.597581	0.00641799	-1.19369	-0.685744	-0.973821	0.216404	-0.355731	0.340201	0.385381	0.536732	-0.142658	0.17349	-0.00641799	0.403621	-0.0981786	-0.145691	-0.62294	0.460883	0.321849	0.338601	0.691132	0.737246	-0.779625	-3.75685	-1.00688	-1.14232	0.752982	-0.268303	0.680556	-3.78548	-0.645224	-0.574836	0.534037	-2.47875	0.609561	-2.06473	-0.22016	0.0603597	0.427948	0.138539
LINC00308	-1.22825	-1.00055	-0.670058	0.0901246	0.381265	0.468836	1.69901	-1.24435	2.15339	-0.508924	-2.85045	-2.34563	-0.506694	1.37421	2.00182	-0.704016	1.6009	0.149541	0.222631	1.28949	1.71576	-2.35329	0.819582	-1.41437	-1.18966	0.755605	1.0903	1.20949	1.86847	1.53426	-0.457648	1.46541	-2.1815	-2.6705	-3.52731	-2.92025	-1.47021	-0.0783353	0.0783353	1.04765	-2.95115	1.59529	-1.87716	-1.18837	1.5339	-1.01575
WFDC11	-1.56641	-0.42405	1.75247	-1.6519	0.625889	-2.36615	-0.260845	-1.28746	0.538329	-1.3184	-1.35512	1.55071	0.406726	0.409771	0.344691	2.41969	-1.00469	0.0256629	-1.16587	-0.468476	0.499542	2.45816	-0.701016	-0.441989	1.68253	-0.743042	-0.594162	-0.355592	-1.51616	0.074295	2.43908	-1.10048	0.124609	0.265485	2.72115	-1.20082	-0.279946	-0.465981	2.23012	1.45903	-1.20727	0.226464	2.84668	-0.0256634	2.4171	1.55927
JAK1	0.130162	-0.23346	-0.439377	-0.213295	-0.199958	0.400888	0.40623	0.0848722	0.238725	0.0320272	-0.016695	-0.207067	0.0575485	-0.157228	-0.294581	0.0866737	0.6077	-0.103717	-0.184505	-0.441579	-0.103775	0.0959587	-0.204399	-0.0433168	-0.0350208	-0.343219	0.380496	-0.21489	0.016695	0.42391	0.680751	0.478493	-0.0189571	0.413264	0.461706	0.439895	0.162296	0.341861	0.436969	0.559962	0.549126	-0.419185	-0.541243	-0.858291	-0.351089	-0.442215
COP1	0.242739	-0.0628037	-0.584131	-0.00470972	-0.296635	0.447978	0.0438256	0.229838	0.134331	0.143724	0.374527	-0.108303	-0.0581851	-0.0243926	-0.0983186	0.214859	0.773124	-0.115237	-0.107139	0.257339	-0.324893	-0.408535	-0.0688863	0.416558	-0.0407357	0.0681853	-0.161469	-0.076508	-0.105092	-0.0271687	0.244439	0.248745	0.571154	0.158819	0.144872	0.19551	0.5425	0.564995	0.158835	0.124606	-0.0781217	0.00470972	-0.143788	-0.143005	-0.344126	-0.0338359
ANLN	0.305577	0.633104	-0.662932	-1.3066	0.441012	0.292022	0.733779	-0.637851	-0.860363	0.915685	0.340855	0.669992	-1.20671	0.29954	0.272718	0.420426	1.03093	-0.553257	0.721266	0.275055	0.0619445	-0.776406	0.144878	-0.0953031	-0.201456	0.198987	-1.00863	0.123009	-0.269537	0.27207	-0.694898	0.0895734	0.602496	-0.61675	-0.335717	-0.836149	-0.118392	0.55268	-0.0619445	-1.28906	-0.86729	0.46394	-0.202801	-1.04578	-0.854003	-0.442016
SPRR4	-0.0108867	0.139701	0.0004	0.652928	0.0610375	-0.164084	0.134034	0.184931	0.450501	-0.211495	-0.435229	-1.12279	0.0198226	0.351882	0.633829	-0.0818763	-0.132277	-0.107883	0.39697	0.18752	-0.210417	0.134898	0.193883	0.419691	0.539412	-0.213909	0.541904	-0.133507	0.104789	-1.5643	0.19897	-0.838819	-0.559643	-0.735083	-0.0004	0.369899	-0.560027	-0.615583	-0.385368	0.385547	-0.179796	0.384329	-0.250168	-0.445064	0.175019	-0.227913
HSH2D	-0.596378	-0.557296	-0.318572	0.3429	-0.0885537	-0.000344	-0.348337	0.366096	-0.377143	-0.716463	-1.06269	-0.310911	0.55823	-0.589049	-2.75925	-0.259067	-1.12751	-1.44833	0.000344	-0.702311	0.0939877	-0.133657	-0.890935	1.47009	0.741966	1.28457	0.373235	0.122617	0.100273	-0.248559	0.795025	-0.216893	0.217239	0.422609	0.00489736	0.510733	0.960755	0.463857	0.678217	0.640872	0.674695	-0.805198	0.205307	-0.38305	-0.155203	0.0783045
TMEM163	0.270789	0.330002	0.433111	0.588491	0.358376	-0.93739	0.000105	-1.69031	0.56193	-0.111123	-1.54272	-0.713367	0.142656	0.0273681	-0.392447	-0.272452	-0.532169	-0.305914	-0.071259	0.641678	0.778591	-0.203308	0.108535	-0.48455	-0.128884	1.08671	0.821859	-0.000105	-0.2931	-0.583662	0.104687	-1.06971	0.247245	0.957619	-0.131034	-0.220222	0.973301	-0.36267	-0.784046	1.88011	0.0141001	-0.253742	-0.346139	0.532343	0.515355	1.62109
JMJD6	2.5958	2.44845	0.489162	0.512269	0.465074	2.62482	0.247888	-1.07388	3.52574	2.27183	-1.02781	-1.30906	0.145822	-0.659072	0.852283	1.28484	-1.02404	0.522474	0.285723	-0.689874	0.110434	-0.254778	-0.453706	0.320038	1.24799	-0.442692	0.430616	-0.520992	-0.867032	-0.860776	-0.681849	-0.577841	-1.27383	2.25288	-0.765622	-0.962776	-1.49204	2.0568	-0.704544	0.965962	-0.513943	-1.26792	1.94289	-0.110434	-0.413063	3.43244
ARSG	-0.100151	0.860768	-0.541895	-1.59202	0.78369	-1.55961	-0.877295	-0.728759	1.17245	-0.392841	0.0964751	-0.00245476	0.326686	0.0480642	-0.390146	0.827148	0.680987	-0.301145	0.418261	-0.0133491	0.342508	0.324379	0.919589	-1.28984	0.308253	-0.579964	-0.00151443	0.701772	-0.454774	-0.389653	0.00151443	-2.34378	0.0784855	0.916726	1.04313	0.0669765	-1.47173	0.0913668	0.968178	-0.77684	-0.19274	-0.274344	-0.865919	0.362708	-1.15034	0.219982
ZNF101	0.558857	0.530697	1.04685	0.287403	-0.0978463	-0.590617	0.419998	1.40264	-0.190899	0.65029	0.0374773	0.102793	0.724112	0.669378	-0.596148	0.993387	-0.547364	-0.223003	0.696885	-0.687247	0.429964	-0.292996	-0.031379	0.484244	-0.370169	0.503438	0.262538	-0.174668	0.111681	-0.55706	0.0428822	-0.755721	-0.0517437	0.470844	0.00215888	-0.00215888	0.788683	-0.653671	-0.450927	-0.136977	-0.42701	-0.983029	-1.50823	-0.214837	0.190501	-0.109572
PHC3	-0.333304	-0.310086	-0.368711	-0.032109	-0.236689	0.00465321	0.078234	-0.752765	-0.14391	-0.357752	-0.33512	-0.0387852	-0.358325	0.277194	-0.0171058	0.0529845	0.327726	-0.14625	0.261981	-0.206722	0.0488551	0.0715601	-0.010041	-0.350143	-0.563343	0.780968	-0.228894	0.380543	0.350439	-0.00465321	0.145621	0.470635	-0.118298	0.186577	-0.0616672	0.139797	0.283363	0.668002	0.107953	-0.235908	-0.166705	0.178715	0.175523	0.235543	0.619589	0.532005
IL11RA	-0.847811	-0.0846932	0.252341	0.26972	-0.0617449	0.0120313	-0.119846	0.447202	-0.382557	-0.39467	-0.16842	-0.014683	-0.82202	-0.0423424	0.428107	0.208381	-0.0502808	-0.31871	-0.856134	0.504082	0.361017	0.262163	0.368062	0.0870597	-0.340532	-1.53445	0.444557	-1.0511	0.00546336	0.00442195	0.455858	-0.179433	-0.0386775	0.311751	0.156562	-0.00442195	0.271067	0.268142	0.463965	0.466978	-0.103333	-1.20915	0.230869	0.673956	-0.0489976	-0.223405
TNFRSF10A	-0.041584	-0.583306	-0.339647	-0.179531	-0.464556	0.761723	0.51	1.3674	0.224838	1.37307	1.24511	1.0641	0.0864935	-0.0247068	0.196826	-0.00403881	1.25861	-0.656051	0.153174	0.271678	-0.161104	0.961497	0.931838	0.208924	0.118361	0.450623	0.212691	-0.34406	0.922751	-0.0156679	0.00343609	0.376514	-0.0585451	-0.752758	-0.026906	-0.367162	-0.00343609	-0.950716	0.0293551	-0.62113	-0.910153	-0.428102	-0.0860162	-0.826357	-0.946476	0.0509658
C5orf22	0.561924	-0.347157	-0.376664	-0.470956	-0.722144	-0.000144	0.485194	0.000144	-1.01322	-0.0654006	-0.362153	-0.482819	-0.481732	0.631365	-0.498145	0.00799799	-0.213936	0.0814195	0.024322	-0.193415	0.299045	-0.637197	0.461382	-0.0295806	-0.618672	-0.385881	-0.216242	-0.770191	-0.0265336	0.12095	0.473972	1.14944	0.897342	0.415524	0.95632	0.742673	1.01045	0.561608	0.383928	0.650335	0.578099	-0.0100703	-0.836979	-0.392099	0.0633264	0.401242
PCDHGB7	-1.27055	1.68899	-1.28687	-2.16125	2.48113	-1.37984	-0.982422	-2.08873	-2.17956	-1.66284	-2.14015	-2.15024	-1.21606	0.560176	-1.18872	-0.939086	0.816124	1.577	1.59633	0.897671	0.761729	-1.9812	2.50219	-2.10959	2.19117	0.958292	1.31275	2.27375	0.132402	-0.172276	-1.26669	-1.79602	-2.1353	0.0398769	0.623957	-1.3124	1.90199	0.60297	1.44637	-2.16408	1.93911	-0.965733	0.407457	0.262751	-0.0398774	1.77737
FLCN	-0.753108	-0.91076	1.02369	-0.774922	-0.242652	0.0672963	-0.361939	-0.402344	-0.148177	-0.476223	-0.152925	0.180764	-0.121956	-0.042814	-0.621142	-0.52061	-1.30827	0.042814	-1.0682	-0.295363	0.207774	0.524989	0.424731	-0.536973	-0.328124	-0.467156	-0.11882	-0.130002	-0.326639	0.598607	0.184994	0.543936	0.66666	0.574172	0.468505	0.236142	0.0853136	0.176823	0.0470784	0.421042	0.978182	-0.26574	1.00726	0.660503	0.347181	0.304655
JMJD1C-AS1	0.44728	0.748713	0.68822	-0.0611184	-0.819178	-0.0377829	-0.307881	0.0694358	0.455713	0.541508	-1.45172	-0.187808	0.99386	-0.112634	-1.08726	0.334693	0.198594	-0.0513647	-0.191005	-1.72834	0.349344	0.34068	0.0457189	0.159549	0.718517	0.237929	0.420429	-0.334378	0.477268	-3.3568	0.198399	-1.85375	-0.707388	-0.0179393	-0.338648	0.0532925	-0.7986	-3.67145	0.0179393	0.838262	-0.651432	0.343462	-0.585651	-0.219915	0.307876	-0.379564
LRRC7	-0.215407	-1.17222	1.40932	-0.493648	-1.4368	-0.483256	-0.349089	-0.114866	0.944825	-2.30233	-1.42653	0.338923	0.255879	2.55807	-0.378943	-1.21068	-1.0077	1.63023	1.97711	-2.03278	-0.113004	0.113004	-0.844576	0.14815	3.05264	1.92925	2.27755	0.40323	-0.651975	-0.449376	0.324232	2.76253	-1.21337	-0.143099	2.17243	-0.771232	-0.988811	1.20546	-0.360544	-0.162992	0.133508	2.83963	0.535297	0.603249	0.975456	0.125844
IGSF3	1.8275	1.20006	-0.133309	-1.28169	-0.583172	-0.727654	2.04285	-0.766814	-0.596699	-0.472199	-0.485577	0.219647	-1.22862	0.0785251	-0.687331	0.0487914	-0.102653	1.61309	-1.85064	-0.29384	-0.151043	-0.452141	-1.3848	1.76585	-1.16313	-0.692791	2.05026	0.298103	1.5102	0.0672283	1.10213	1.39374	-0.0487914	1.28026	0.123187	1.39185	-0.432193	0.420564	2.53714	0.115959	1.81722	1.68254	-0.101321	-0.501621	-0.82493	0.329153
RFX6	-4.46606	-2.95623	1.20741	1.31316	-3.02855	-4.45693	-2.32141	-3.50538	1.04944	2.36259	-3.80945	-0.533434	0.606126	3.09513	0.219156	-2.94001	-3.42798	-3.51376	0.992371	-4.90412	2.3965	0.824553	-3.03669	3.69968	0.971081	-0.903712	1.92202	-3.47864	-1.73973	-3.64397	1.43355	0.529556	-0.219156	1.10252	-2.03718	1.19138	0.399657	0.356565	-4.07337	-0.536889	-2.93664	-0.943909	2.46051	1.86245	1.11384	2.25766
DIRC1	0.179784	-1.14987	1.12604	-1.3418	1.2195	0.0229545	-0.259027	-3.38315	2.22433	-0.841423	0.0759225	0.364268	-2.20486	1.2378	-1.02443	-1.09921	-1.25333	2.05719	-0.979645	1.05397	0.971174	-0.352161	-0.00554943	-0.858216	-0.561231	-1.53073	-0.633185	-1.05546	-2.68398	0.50569	0.96388	1.3012	0.0559592	0.709717	-0.841028	0.64717	0.98866	-1.24788	0.217511	-2.24373	0.402506	1.49246	-0.301082	-0.582481	0.00554943	1.16386
DNAJB7	-2.42485	-0.180461	1.05723	2.20151	1.34481	0.0981722	-0.765953	-0.78239	0.0485177	-2.38825	2.12101	-1.23053	-0.932249	0.389411	1.24911	1.37817	-1.1508	-1.12476	2.2593	-0.0983868	-1.75558	-1.2512	1.513	-0.880908	-0.79834	1.75679	1.65347	2.11381	1.17073	-0.706328	-1.51099	-1.94691	-1.30069	1.76549	2.68479	-0.0485177	1.24996	-0.581269	2.5271	-0.324428	-0.882837	1.29684	2.48484	3.60343	-0.34432	1.00985
UCN3	-0.0302882	0.407633	0.270283	-2.10127	0.386101	-0.294446	1.27629	-1.77346	1.24906	0.0383306	-0.0532899	-0.12552	0.0907645	-1.78607	-0.413157	-2.28135	0.805761	-0.258882	0.333446	-2.21019	-0.973338	0.389483	-0.549692	-2.5759	0.0302882	-0.0953193	-0.861544	-0.497733	0.896857	0.0863977	0.248564	-0.654355	-1.15367	0.673631	-0.434721	0.857909	1.08101	-0.92454	0.452397	0.231879	-1.00955	1.15748	0.601768	-0.519858	0.805636	1.0243
GRHL1	-0.105823	0.552159	0.637932	-1.02591	-0.405894	0.0179908	0.137214	-0.139451	1.06523	-0.343227	-0.810069	-0.619605	-0.0211341	-0.204176	0.159278	0.35167	0.536127	0.248605	-0.360788	0.558421	0.322041	-0.523478	0.414005	0.597955	-0.120311	-0.514946	0.302722	-0.491603	-1.84028	-3.30831	-0.146402	0.466021	-0.388165	-0.143404	0.292982	-0.175658	0.919183	0.969438	0.325921	0.525832	-0.62919	-0.194514	0.393926	0.924022	-0.0179908	0.445842
CNBD2	-1.32724	2.06363	-0.453045	-1.11265	-0.242703	-0.71971	1.66075	1.86517	2.546	-0.60883	-0.0517817	1.58241	1.98093	-0.36643	0.0122805	-0.466697	-0.509862	0.209802	-1.63639	-0.303326	2.13475	-0.258006	-0.29021	2.84227	1.61075	1.43707	1.39236	-0.856124	2.1474	-0.232399	-0.285557	-1.34576	0.843697	-0.401035	2.2756	0.0916071	-1.1913	2.51416	1.85869	2.86441	0.384139	-0.0122809	0.630957	-0.878781	2.74763	-0.287794
CASKIN1	-0.446718	-0.28061	0.418409	0.398252	-0.14187	-0.178717	-0.330307	0.338945	1.9735	-0.582612	-0.753252	0.202601	-0.388778	-0.251708	-0.00821543	2.28378	-0.0134106	-0.463445	0.00566626	0.353108	-0.0621104	-0.509555	-0.00566626	-0.413815	1.91307	0.0970073	0.793594	-0.108957	0.47741	-0.974997	0.311349	0.329531	0.0247545	0.477186	0.0788274	0.0686431	2.01606	-0.36779	-0.604071	0.654763	-0.0390711	-0.598094	2.53594	2.02523	-0.265234	0.239111
CACNA2D4	0.290616	-0.0139499	0.109479	0.203207	-0.222892	-0.724049	-0.0482292	-0.0438194	0.481216	-0.305497	-0.890499	-0.320132	-0.0444064	-0.0353098	-0.101308	0.00135851	-2.59289	-0.753289	0.360946	-0.69458	-0.0921545	0.0455012	0.0639043	-0.00135851	0.213811	-1.2056	-0.198049	0.15927	-0.621127	0.0585604	0.283129	0.060607	0.12573	0.188877	0.309864	-0.283457	0.318291	0.234576	0.236546	-0.565156	0.22922	-0.329881	0.192891	0.220507	-0.636186	0.135488
ARL11	-1.42901	-0.946215	0.158395	1.22746	1.02997	-1.27903	-2.79982	0.50526	2.11282	0.729143	1.39094	-1.80965	2.17783	-1.24331	-1.96603	1.07287	-0.704068	0.630287	1.39206	-0.830529	1.77381	-1.31656	-1.35647	1.72048	3.44211	1.92597	1.27459	-1.83096	-1.29137	-0.380738	1.39138	1.30238	-0.496909	1.68617	-0.7698	-0.957855	-2.83886	-0.482525	1.70209	-0.190294	2.4625	-0.244452	1.72806	-0.158395	1.64164	-0.681538
NIPA1	-0.398788	-0.150714	-0.0805278	-0.265041	-0.944582	0.364383	-0.696627	-0.440268	-0.706422	1.08664	-0.176638	0.136244	-0.360982	-0.0631261	-0.599534	0.659957	0.481074	-0.954167	-0.412101	0.00587273	-0.385388	0.142394	0.287585	1.08154	0.569618	0.70491	-0.00587273	-0.79387	-0.122127	0.202672	0.80265	1.15402	-0.0269084	0.0134029	0.371705	0.35198	-0.277962	-0.10781	0.365387	0.387408	1.16133	-0.0493245	0.0314827	0.113569	0.0373278	-0.737103
TUBA3FP	0.222151	0.266091	-1.44312	-0.0913525	-2.1374	-0.950242	0.301606	-0.154343	0.873143	-1.12329	-0.596321	0.534908	0.63852	-0.233252	0.347432	-2.12714	0.340578	0.375491	0.266019	0.892926	-0.176043	-1.02406	0.427522	0.956072	-0.561221	-0.687066	-0.276298	-0.415221	0.782009	0.206714	0.077508	-0.0553851	-0.321215	-1.40214	-0.827919	0.00396585	0.20902	-2.10665	0.0859117	0.724042	0.27771	-0.176098	0.783534	0.648441	-0.244934	-0.00396585
CARD16	-0.375962	0.687607	0.925717	1.11946	0.365227	-0.00665236	0.191218	-0.701418	0.173033	-0.77404	-1.43304	-0.0485549	0.858922	0.194756	-0.641458	-0.496208	-0.777239	-0.292599	-0.788981	0.383057	1.2236	0.634627	0.00665236	0.307677	-0.483719	-0.126922	0.325256	-0.376593	-0.224123	-1.02133	0.14586	-0.841667	-0.279009	0.794408	-0.320834	0.659378	0.0188203	0.0909867	-0.182224	0.0537305	0.302989	-0.179861	-0.473204	-0.320107	0.561451	0.233211
DUSP19	-0.113504	-0.352288	0.144548	1.12436	-1.70398	0.456804	-0.0488424	-0.347489	1.15134	-0.635599	-1.12803	-0.403845	0.537267	0.809599	0.493717	-0.21981	-0.166824	0.372032	-2.86965	0.159286	-0.282928	-0.157244	-1.22757	0.685168	-0.553901	0.873203	0.8171	0.185303	-0.0821962	-0.0568657	0.0839062	0.0449739	-0.475192	-0.479954	-0.0449739	0.512374	0.900249	-0.187303	0.202745	0.713187	-0.254797	-0.137112	0.233753	0.400187	1.01479	1.26382
CYB5D1	0.0422738	0.0237782	0.31867	0.251694	0.213022	-0.122567	0.653504	-0.281719	0.535936	0.270337	0.562333	-0.619629	-0.402551	-0.345271	-0.0688584	0.196187	0.820621	-0.50962	-0.124207	-0.129442	0.49658	-0.33128	-0.374817	-0.389955	-0.164938	0.273932	-0.335984	-0.471829	-0.0237782	0.403996	0.624025	-0.676611	-0.379044	-0.0663006	-0.610582	0.461952	0.0622928	0.183534	0.151681	1.18928	-0.150973	0.871982	0.846056	-0.274139	-0.425213	0.0826199
CREG2	3.24759	-0.748163	-0.703433	-0.00926161	2.15172	-1.72643	1.32924	-2.31294	-0.228022	-0.0049653	-1.34701	-1.3754	-1.30384	1.45345	-1.95042	1.35379	-2.59082	2.85478	1.10135	2.20732	2.10167	0.520653	2.16671	-0.0643907	1.77889	-0.540318	-0.807754	-1.03211	0.15727	2.58427	-1.62725	1.93427	0.0049653	-0.481274	-0.39589	-1.0099	0.195531	1.92129	0.956422	1.97876	-0.479271	0.107424	2.5	1.94177	-0.772721	-0.477573
SPEF2	1.37294	-0.234264	1.25248	0.813925	-0.0732262	-0.376543	0.673882	-0.978571	0.0910471	0.623456	0.479344	-0.277573	-0.617846	1.86102	-0.30727	0.657947	-2.40818	-0.661141	0.0172341	0.510151	0.413697	0.266288	-0.362387	-1.15747	-0.587186	0.500994	0.49127	-0.0172341	-0.582171	-0.334706	-0.534188	-0.193103	-0.0366595	0.598194	1.44518	0.566871	1.23591	-0.0787847	-1.45041	1.0206	-0.658066	1.60599	-0.323068	0.668321	0.660908	-1.75341
RHOXF1	0.463881	0.806152	-0.20135	0.794401	0.514493	-0.700255	-0.172842	-0.097662	0.420287	-0.512466	-0.357532	-0.549975	-0.543307	0.319646	0.575666	0.358602	-0.00817299	0.541886	-0.032608	-0.707534	0.488657	-0.115887	0.21978	0.768093	0.248044	0.518843	-0.781478	0.101978	0.164048	-1.45673	0.056942	-0.325995	0.0973668	-0.0483212	0.437114	0.00817299	-0.817063	-0.400518	0.271612	-0.131492	-0.403083	-0.772495	0.0574255	-0.447989	1.05679	-0.359107
ADAMTS17	-1.12111	0.153194	-0.0628653	0.861712	-0.586171	-2.9429	-1.11282	-0.259282	0.768535	0.487	2.28954	-0.15938	0.571529	1.72906	1.92366	-0.700858	-1.3917	-3.20411	-0.822651	2.04584	1.94222	0.151974	0.0628653	0.581801	-0.931011	-2.31074	-0.615747	1.53349	1.26958	1.21025	0.399839	-0.406733	-1.12392	1.77242	-1.226	1.4547	1.09646	-0.827785	-0.340717	-1.30836	0.676227	1.31966	1.56422	-1.0016	-0.445799	-0.53242
DHH	-0.927659	0.649942	0.798433	0.291504	0.0257673	0.701006	1.02831	0.504957	0.678267	0.329349	-1.65193	-0.148698	1.50969	-0.838481	0.963145	0.53881	-0.280691	0.515272	-1.98941	1.49067	-1.12854	0.328136	-0.594107	-1.53509	-1.37707	1.0353	0.232914	-0.373261	-1.33977	-1.16267	-0.624101	-0.0257673	-0.167914	-0.673096	-1.46474	0.940257	-0.586625	-2.54584	-1.49595	-0.594225	1.34767	0.586996	0.150639	-0.595248	1.4936	0.648693
ABRA	-1.68288	1.26514	-0.599931	0.947214	-1.81418	3.36281	0.156032	-0.862996	0.0413179	-1.00092	-1.56749	2.27322	1.36625	-1.58125	0.540047	-1.26476	-0.359653	-0.645201	-1.59896	0.234441	-0.406584	-0.0413179	0.194842	1.89033	0.427386	-0.11378	-0.993435	-1.45778	-1.24178	-1.46458	0.39001	-0.159731	1.9076	1.17995	1.29055	-1.59417	0.468751	3.12696	2.5257	1.13579	0.369026	-1.35901	-0.154076	1.17109	-0.117417	0.521111
KLHDC1	-0.657704	-1.3687	1.47879	0.559889	0.013881	-0.670029	-2.27107	-0.984132	0.265478	-0.988848	-0.0981691	-0.6832	1.39409	-0.0616148	-0.301338	-0.665446	-1.61513	0.329156	-0.432319	0.23957	-0.132336	0.756385	0.3272	-0.963026	-0.36575	0.0202382	1.22511	-0.10599	0.127154	-0.472182	0.586786	-0.573886	0.248348	0.162149	0.349763	1.06546	-0.013881	-0.362487	-1.73687	0.627591	0.771523	-1.19101	0.795327	1.50046	1.11792	0.974777
C2orf15	-2.43375	0.365962	-1.68192	0.860055	0.31056	1.07176	1.26999	0.394932	-1.26489	0.668237	0.929404	-0.115794	-2.93807	0.93764	-2.0735	-0.230849	1.41783	-3.6759	0.530634	-1.99568	0.471824	-4.51015	0.994354	1.90568	-0.719284	0.066571	-2.03042	1.41363	0.917984	0.980956	0.0902875	-0.000565	0.000565	-1.40248	-2.77854	-0.063843	0.248738	-2.05653	-0.614877	-1.58418	-1.65041	-2.21285	1.04926	0.990434	-1.86171	-1.31381
KCNH8	-1.9913	-0.188875	-0.536369	-0.652961	0.326254	-2.99701	0.032604	0.478874	-0.46595	0.355672	0.0939233	-2.26106	-1.01741	0.455315	1.71151	0.845045	-0.032604	-1.47873	-0.63194	-0.440006	-0.838836	-0.952473	-0.051626	0.767288	-0.284673	-0.256351	-1.24935	0.378389	0.469248	1.37178	0.652889	1.15461	0.741194	-0.671667	-0.515603	-1.40273	0.616631	0.167294	-5.32465	0.813749	0.527043	0.92452	0.525222	1.2953	-0.826819	0.430419
SLCO6A1	-1.83704	-1.96068	-2.1938	-0.606724	-0.0946059	0.847313	0.626548	0.845168	1.47014	-0.0647731	-1.14023	-0.805945	1.35284	-0.817192	1.1747	1.11892	-0.543557	-0.287671	0.777005	-1.01408	1.03703	-1.65367	0.210661	2.20587	-2.64218	1.5136	1.68155	1.35134	1.64144	-2.25692	-1.28909	0.0647731	-0.977732	-0.532624	-0.76029	-2.84401	-1.43821	1.1398	1.63207	1.74856	1.0145	1.40221	-0.6195	2.13141	1.95263	-0.944977
PP2D1	0.129465	0.241992	-0.13437	-0.447655	-0.574366	-3.64818	0.875285	-2.79005	0.31838	-0.0674982	0.394811	-0.154168	-0.04388	0.27744	0.0827165	0.319601	-4.36676	-1.19368	0.31184	0.331553	0.212172	-0.24806	-0.773895	0.0624542	0.448086	0.743831	-4.60354	0.724112	0.276086	-0.749425	-2.0137	0.326283	-1.37342	0.0496421	-0.54245	-2.7418	-0.643741	0.699348	-0.690013	-0.919579	-0.044663	0.0438805	0.173527	1.09143	0.986826	-0.35897
CIB3	0.0814438	1.13294	-1.23933	0.753535	-1.53337	-1.8376	-1.19157	-1.60018	-1.10322	-0.288471	0.756035	0.0162792	-0.00693083	-0.00423098	-0.380547	-1.67236	-1.03165	-0.97139	0.868409	0.652184	0.527304	0.640829	-1.1634	0.930036	-1.43525	-1.25459	0.00423098	-0.428308	-0.564384	0.816626	0.0636306	-1.66446	0.181963	-0.561864	-1.19927	0.592662	1.38576	0.510141	-0.869575	0.72412	0.191038	0.280882	-0.0579743	1.53312	1.72391	1.36833
CADM2	-0.410108	2.45014	3.06737	-0.447179	0.324248	-0.8514	-2.29897	-0.788753	1.10701	-2.47193	2.25438	1.58238	2.5238	-0.46242	0.62625	1.37384	0.0146508	-2.55524	-0.374804	1.59801	-1.93921	-0.0146508	2.51417	1.29732	-1.49442	-0.672538	0.180032	-1.83369	-0.299435	1.48527	2.01724	-0.922737	-2.0814	1.70801	-0.579388	-1.2524	-1.22077	-2.18713	1.48552	1.62384	-1.49491	2.27386	2.35178	2.89422	0.414641	-0.132856
DOCK8-AS1	2.74595	-0.33716	-0.0742207	2.76209	-0.891888	-1.52168	0.0987616	-0.617718	3.76981	-0.52423	0.169347	-0.0746384	-1.03021	-0.590176	-0.169682	-0.895436	0.535782	-0.220585	-0.0647855	0.21826	1.99493	1.56062	0.083106	0.077569	-0.563769	0.54342	1.5939	-0.0608129	-0.696116	-0.900692	-1.08701	-0.952551	-0.808077	-1.38217	0.375847	0.567321	2.09217	-0.255378	-0.024456	0.86425	0.024456	0.0637202	0.447615	1.36413	2.54694	0.355762
HDAC9	0.0764594	0.0880184	-0.202209	-1.62903	2.94373	-0.242664	0.762405	0.032208	3.39704	-0.867649	0.443321	-0.639428	-0.63119	3.38434	-0.268457	-0.032208	-0.0877371	-0.439536	1.77056	2.59404	-1.39932	2.02366	0.267213	2.14824	0.437533	-0.328211	1.81555	-0.182307	-0.105159	0.664087	-1.3902	-0.0840292	-1.15193	-0.314271	-0.142648	-0.657542	0.457846	0.173332	-1.54339	-1.19834	-0.473449	1.61654	2.8161	2.93945	0.501633	0.796781
TMEM67	-1.46723	0.144583	-1.03962	-0.241305	3.26846	-1.93735	2.43106	2.90597	-0.628535	0.900361	-1.66638	2.70031	0.263913	-1.05663	1.89628	0.130827	-0.130827	-0.40664	-0.387434	2.07812	3.03476	-0.722789	-1.41293	-0.175716	-0.394945	1.77019	1.83362	0.180714	-0.607824	-0.35588	-0.269965	-1.061	-1.90793	2.90588	2.28709	-1.05235	-1.52847	-1.93402	0.139673	3.62782	2.04912	-1.32046	3.7622	3.4154	3.17958	0.450397
HS6ST2	-1.43618	3.69908	1.58729	-0.968117	2.78758	-0.909467	2.88558	2.92292	-0.0220966	-1.75219	3.87138	-1.92443	0.0220966	-2.17324	-3.05714	-2.05304	3.63338	-2.04921	-0.329236	-0.503726	-2.03096	-0.421738	-1.24859	2.1216	-0.25896	-0.787312	-1.314	0.251623	2.91053	3.66676	-0.94133	3.01571	1.9988	2.22678	3.09385	1.73774	1.35952	-0.786985	3.28044	-2.81948	-0.317839	3.69555	2.46965	-0.461175	2.98987	0.792466
CAMKK1	-1.21965	-0.955265	1.56471	1.85751	1.90479	-0.750575	2.12962	0.0643168	2.22056	-0.789623	1.41264	-1.74389	1.57501	1.41392	2.34952	1.68918	1.45567	-0.616985	0.610608	1.58792	-0.0643163	0.988863	1.05625	1.58882	-0.457999	0.840857	2.72782	2.37936	0.486533	-1.43313	-0.805697	-0.847459	-1.34418	-1.69328	-0.895658	-0.615192	-1.83959	-0.74188	-0.55191	-0.508717	-2.50041	2.1024	0.390511	-0.925126	-0.584595	-0.513085
ZNF625	0.214539	-1.24231	-0.272373	0.476988	0.619719	-0.35372	0.741764	0.0934696	0.447659	-0.0160723	-0.649655	-0.587909	-0.307304	0.0948477	-0.0276184	-0.651294	-0.333544	-0.665772	-1.72382	0.503373	-0.117382	-0.130758	0.707573	0.195638	0.407793	-0.0448303	0.0775275	-0.0663929	-2.48522	0.40168	0.214789	0.0160723	0.601594	0.0392494	0.493675	-0.630764	0.104761	-0.0178227	-1.55083	0.643798	-1.76389	-0.395267	0.833165	0.945247	0.608535	-2.3142
ZNF563	-1.18984	-0.0626907	0.379748	0.199474	-0.286454	0.284926	0.322399	-0.348401	0.0690832	0.563366	-1.37349	-0.115493	0.0818782	0.215901	0.612278	0.584271	-0.340315	-0.611709	0.360723	0.202095	0.108353	-0.956971	0.898852	0.814677	-1.27806	-0.060504	0.294006	-0.284368	0.506035	-0.543828	-0.988966	0.0174794	-0.906939	-0.0282083	0.82584	-0.489422	-2.78969	0.568283	-0.239183	-0.0174794	-0.933493	-0.344373	0.277435	0.290475	-0.560535	0.929556
LIN9	-0.575326	-0.104221	0.15884	1.0799	-0.832898	-0.97164	0.615718	-0.344282	-0.4572	-1.21785	-0.501204	-0.218713	0.974124	0.0297909	-0.559311	0.444585	0.765072	-0.025022	0.0250216	1.49849	1.07763	-0.490027	-0.293758	0.933219	-1.08284	-1.3225	1.97989	-0.664218	-0.327988	0.359788	0.174012	-0.848804	-0.0502939	0.611124	-1.13434	-0.732717	-0.913262	1.38001	-0.977765	1.87405	0.817565	0.457791	0.789416	1.6791	3.63114	1.12122
CLEC4D	-0.339536	-0.0389028	0.128772	-0.0626812	0.335711	-0.589109	0.109584	-0.638622	1.31593	-1.09817	0.134367	-0.2305	0.277029	-0.00405026	0.543738	0.582547	-0.2434	1.25041	0.00405026	0.721502	0.253566	1.31458	1.0909	-0.0512214	-2.15055	-0.312551	-0.34931	0.493721	-0.767676	0.16272	-0.0600247	0.00423288	-0.72048	-0.0770092	0.273443	0.0984745	0.38127	-0.370082	-0.218307	1.01961	0.157156	-0.535657	-0.0976055	0.280801	-0.248136	-0.0678873
GPRC6A	2.13421	-0.880836	-0.482742	-0.411646	-0.372897	0.739362	-0.231986	1.24266	1.78262	1.1405	1.41174	-0.189369	-0.958995	2.64065	-0.484806	-0.542158	2.11714	-1.43826	-0.691006	1.78647	0.469006	-0.523379	0.280332	-0.375805	0.812236	-0.0250721	-1.59796	-0.262599	1.41409	0.49541	2.47939	1.65527	-0.748038	2.47245	-0.004035	1.65563	2.84423	1.50367	1.67802	-0.894734	0.00403547	-0.207564	-0.0208292	2.36837	-0.0493588	-1.29769
RAET1E	-2.65375	-0.010428	-0.605111	-1.2865	-0.335699	-1.4106	1.63016	-0.795889	1.97084	-1.12831	1.12851	0.939699	1.65951	0.0104275	-2.01178	0.875405	-0.024065	-0.294701	1.70236	-1.44913	-0.370604	1.07442	-2.82266	0.973321	1.9672	-1.15265	-0.571065	-0.0599194	0.459372	1.78515	-1.31494	1.18763	0.704735	1.48256	-1.34649	-0.682787	1.38724	0.485287	1.92112	0.179269	-0.350916	0.882146	1.82196	-1.73546	1.11731	-0.0521173
ZNF417	0.64193	1.06008	1.15862	0.522482	0.227144	-1.26767	0.929346	-2.34788	0.522381	0.79248	-3.57844	-0.857104	1.16542	0.646435	0.0322042	-3.4671	-1.25433	-3.19642	-0.00256205	-4.62738	-0.178546	0.452093	-2.31924	-2.16162	0.0854015	-0.173506	0.590982	-1.97798	-2.66312	0.290075	0.704197	0.0478058	-4.65205	-1.24799	-3.76423	-0.658525	0.158846	0.411876	0.325375	-0.220514	-1.33618	-0.0898752	0.00256252	1.90078	-0.17693	0.506093
HELB	-0.0521228	-0.722941	-0.575235	0.708585	0.814835	0.436604	0.08585	-0.297466	0.000654	0.489552	0.52893	0.218779	0.554597	0.979543	0.152303	0.753738	-1.06847	-0.591684	0.1686	0.265208	-0.000654	0.475091	-1.412	-0.0683219	-0.399705	-0.00699544	-0.495889	0.622472	1.02895	-0.259781	-0.404971	-0.433545	-0.785002	-0.901799	0.312771	-0.169127	0.314339	0.788241	0.0131876	0.533439	-0.856012	-0.0770423	-1.4197	0.125545	-0.584884	-0.885733
SEC62	-0.142542	-0.275534	0.192437	0.374598	0.170428	-0.436087	-1.75494	-0.0170336	-0.284903	-0.426252	0.406399	-0.24394	1.00464	-0.55481	-0.454274	-0.522574	-0.085454	-0.850399	-0.246699	-0.281293	-0.0702615	0.0321636	0.656389	-2.39299	-1.11446	0.827168	0.605202	-0.383417	-0.16902	-0.331044	1.19372	0.606103	0.474223	0.932318	0.928968	1.01884	-0.415627	-0.742898	0.0170336	0.206354	0.31807	2.07274	0.145789	1.5257	0.250884	1.17942
C8orf31	-1.12217	0.679618	-0.93139	-0.989224	2.09613	0.797937	-0.779079	-0.144292	3.02531	-0.292382	-1.83118	-0.0237989	-0.662047	1.5255	-0.247859	-0.0199342	0.126764	1.91331	1.59382	0.204468	2.20457	2.39861	-0.349751	-0.362593	1.91495	0.159445	1.98169	-1.21869	-0.605176	1.42794	2.16691	0.0199342	-1.3459	0.499497	1.11115	2.13966	-0.889595	0.534922	-0.855475	-0.0532904	0.0272179	-2.27108	-0.24617	-0.653018	1.88238	-1.84971
STMN1	1.3119	0.182635	-0.195871	-1.81305	0.892788	0.0882578	-0.185468	2.29329	2.13102	-1.23609	-0.693258	-0.835506	1.21463	-0.475422	0.286472	1.55005	-1.56096	-0.997449	-1.43066	1.48722	-0.283278	1.52932	-1.0285	1.1463	0.0758524	0.249592	0.271214	0.437836	-0.302705	-0.0772133	2.4761	0.511606	-0.546501	-0.197623	0.939947	-0.506705	-0.849349	-0.182827	-0.607151	0.443225	3.04498	-1.20323	-0.0758524	0.120658	-0.296235	2.08656
SIGLEC10	-0.00450277	0.25215	0.473638	-0.276318	-0.165181	-0.362489	-1.27227	-2.09501	0.508741	-0.44438	-0.973888	-0.177622	0.638779	0.566697	-0.437404	-0.391498	-1.24362	0.281492	0.178329	-0.500779	0.404735	0.181803	0.0676289	-1.15069	0.532725	0.884883	0.507031	0.523654	-0.0122547	0.398068	0.695931	-0.720937	0.0169082	1.21803	1.22068	-0.0335159	-0.480551	-0.39246	-1.15361	1.0624	0.465023	-0.785009	0.00450277	-0.549049	0.141417	-1.17812
WFIKKN1	-0.651941	0.023653	-0.484999	-1.34589	-0.949379	-0.221829	0.0596728	0.0378327	0.0921435	-0.353309	0.841383	0.0256605	0.0131035	-0.434825	0.463221	1.04126	0.285973	-0.342062	-0.229924	-1.24823	0.493809	0.886899	0.592695	0.0334096	0.134648	-0.511526	0.3145	1.79805	0.321091	-0.62193	-0.793839	1.96396	0.454133	-0.056541	-0.306899	-0.135479	-0.294372	-0.013103	0.0481224	0.0382099	-0.140059	-0.6878	-1.34037	-0.226582	-1.08024	1.49078
KLF14	-0.49359	-0.364091	0.661708	-0.152908	-0.656464	1.11871	0.0329437	2.01388	-0.245923	-0.325746	-0.0338879	2.33113	-1.05548	0.658796	2.21752	1.90106	-0.433335	-0.326433	-1.19444	-0.365167	1.66771	-1.33922	2.30535	0.198877	0.763394	-1.10744	-0.400371	-0.27539	0.544419	2.21226	1.38069	2.26729	0.297047	-0.415083	2.60189	1.35649	0.917233	-0.580428	-0.861391	-1.15439	-1.01716	-0.0329437	-0.885054	3.51916	1.38539	2.97686
NXNL2	0.197845	-0.175297	-2.94879	0.435718	-1.28912	-0.682234	-0.0881083	-0.678336	0.480909	-0.26062	-0.611549	0.105916	0.624743	-0.453749	0.464949	0.431656	0.803272	0.199129	0.416113	-1.60991	0.0607736	-0.250775	-0.562959	0.347385	-2.13176	-2.48345	-1.87286	-0.0607736	0.263381	0.106405	0.253446	-0.430372	-0.287012	-2.21285	-0.98966	0.498784	0.38981	0.34042	0.0869911	0.344792	-0.149741	-0.925692	0.430274	0.13953	-2.93976	0.759608
BRS3	-0.446671	0.563988	0.114855	0.246788	-0.108101	0.459221	-0.760408	-0.0329995	-0.212056	-2.22681	0.125958	-1.39358	-0.56728	0.0155878	-1.26854	0.2587	1.06685	-1.21	1.92294	-0.125744	-0.830103	2.36142	-0.0155878	-0.609118	1.38574	2.53882	1.85332	-1.22062	-1.41951	-1.07913	0.442521	0.211824	-0.285633	0.403112	1.73772	0.914643	-1.31583	-1.39959	0.94292	0.814915	2.60669	-0.399217	-0.455096	3.342	2.93179	-0.123289
FBXO39	0.0613613	-3.13186	0.053885	0.972377	-0.491206	0.211329	0.980188	0.829981	-0.889837	-3.1817	0.548183	-3.29939	-2.72877	-0.175093	-3.53484	-0.0394254	-0.865042	0.133192	-2.29783	-2.01395	0.0399232	-1.03984	-0.797412	-0.0335255	0.0836716	0.0051775	0.476799	-3.34766	0.432138	0.130717	-0.472672	0.545537	-0.0051775	1.14061	0.839774	-2.95416	0.437041	-0.0177994	0.141498	-0.768163	0.0614443	0.0727196	-0.172661	-1.34601	1.12811	0.233584
B3GNT6	0.0339224	-1.94532	0.44317	1.90589	-1.71784	0.0228922	-1.19856	-0.113094	2.16081	-0.0228922	-2.23124	-4.13691	0.796047	2.86594	-1.72847	-1.76277	-4.03395	-3.74091	0.120834	-3.60995	-4.70992	0.24351	-2.88106	0.182613	-0.846877	-0.213463	1.35686	-1.71495	0.283055	-1.37593	1.7874	1.07772	0.155828	1.41311	0.0980141	1.627	3.7647	-0.802193	-1.5	2.75062	1.01305	-3.46846	-1.23824	0.893055	-0.531509	2.86072
ZNF619	-0.417398	-2.73942	-1.17029	-0.0517352	-0.323556	0.0264485	0.4119	0.485688	-0.777623	0.105045	-0.766064	0.850169	-0.0553834	0.449104	-0.202123	0.186155	-0.470074	0.119745	-0.509324	0.326998	0.571101	-1.05699	0.613794	-0.0262086	-0.0540683	0.13111	-0.744029	0.0262086	0.536897	0.281124	-0.0326197	0.280505	-0.72236	0.0452235	0.429213	-0.762156	0.360823	-0.101519	-0.131531	0.577993	0.063813	0.0973642	-0.930387	-2.14828	-0.28282	0.517696
FAM71D	-2.85765	0.309525	-1.19439	-0.706825	0.0217545	0.732884	-1.09771	0.0921571	0.363696	-1.12856	0.513077	-0.00909638	-0.348924	-1.75672	0.00909638	0.220363	-1.34357	0.328359	-0.13111	0.419377	-1.81487	0.762451	-1.8902	-0.10102	1.05108	0.0859134	-0.0526893	-1.6647	0.873635	-0.611315	0.472907	0.91714	1.15913	-0.918699	-1.41257	-1.71146	0.139332	-1.00115	-0.0224168	0.207237	-2.51577	-0.278482	0.457901	0.334257	0.17339	0.607328
SLC26A1	0.899724	-0.00169659	0.00169611	-0.252297	-0.329003	-0.210991	0.938928	1.0429	0.981626	-0.578757	-0.875034	0.211586	-0.0448942	-0.0154557	1.35295	0.0274653	1.04835	-0.439075	1.18201	0.158009	0.360955	-0.196611	1.35017	2.98999	1.89944	-0.00310898	-0.278694	-0.446781	-0.21256	2.21741	-0.451742	-0.223461	-0.397098	-0.690218	-0.0407333	-0.678849	-0.414286	-0.600845	-0.0899963	0.173155	0.244375	0.675944	0.265454	0.604742	0.882604	1.32466
RAB42	-0.447434	-0.770924	-0.120801	0.297962	-0.207092	-0.361062	-0.415922	-0.299701	0.323675	-1.05596	-0.587726	0.490467	0.550819	0.208056	-0.143427	-0.0296502	-0.370915	0.0296502	0.182203	0.17382	0.675696	0.674179	0.0826283	-0.623514	0.353821	-0.252152	0.941108	0.284619	0.38404	0.294806	0.273678	-0.272866	0.127502	0.635762	-0.0596623	0.275708	-1.1569	-0.643482	-0.493228	0.14029	0.553654	-2.26075	-0.602393	-1.20583	0.0782485	-1.21535
M1AP	-1.95139	4.23073	-0.250995	-1.9706	0.768882	-1.2769	-0.552482	2.82662	0.648545	1.66076	2.8482	-0.574435	-1.3029	-0.069685	-1.99549	-0.0145459	-1.80293	-0.0825291	-0.763329	0.255873	-0.382166	2.43244	3.69982	3.17756	2.37558	2.24491	-1.952	0.0145454	-0.298808	-0.308845	-1.62256	-0.539138	-1.08036	0.339035	2.06449	2.66144	-0.556704	2.05272	-1.24598	2.00917	2.06063	-1.12173	0.0924759	2.09835	2.25738	1.72396
ZSCAN4	0.50125	0.0354862	-1.68193	-1.91374	-1.22947	-2.06742	-0.965038	-0.369898	1.03291	-0.146348	0.481366	-1.85771	2.68009	1.5048	3.34597	-0.129779	1.37233	1.78503	-0.607673	-0.514392	3.16909	0.324422	1.30396	-2.24128	2.23931	0.182423	-2.31762	-0.754743	-0.443938	0.696742	0.918613	-1.5197	-1.82526	1.22491	0.407063	-1.78177	0.423241	-1.23841	-1.10054	-1.6966	1.7098	-1.99851	0.938685	0.00374031	2.57577	-0.00374031
VWA5B1	-1.26068	-0.266259	1.1718	2.22724	0.642641	2.15001	0.474913	2.11291	0.0580974	-0.353195	-0.0214019	-0.403832	0.569175	-0.328733	-1.35029	-0.571637	2.11569	-0.405109	1.54182	-0.125539	1.34759	1.61717	-1.14953	0.662941	0.0214019	-0.549458	2.05625	-1.2155	0.75974	-0.266191	1.85633	-1.54729	-0.43326	-1.15746	1.56874	2.40181	-0.486208	1.69093	-1.24256	-1.67684	-0.263054	-0.811399	1.63634	2.71394	0.108299	-0.775112
LINC00311	-0.314251	0.660909	-2.09316	0.853543	0.231644	-0.746519	0.704547	0.864883	0.063087	-0.351287	0.529726	0.696476	0.554949	-1.69258	0.191978	0.269694	-0.447464	-0.271719	0.609233	-1.59559	0.298296	-0.063087	0.168477	0.093555	0.665138	-2.57475	0.212729	-0.236695	-0.506483	-1.2256	-1.60381	-0.968578	0.0783463	0.558639	-0.208263	-1.55276	0.219364	-3.06096	-0.504741	-0.392484	0.172577	-0.346982	0.58431	0.738795	-1.80414	-1.63564
HTR6	-0.368224	-0.853374	-0.977222	-0.360766	0.268082	-1.377	-0.476424	-0.942689	-1.23039	-2.02062	0.213485	-0.444765	3.02142	0.0289845	-1.20663	-0.973206	-0.602953	0.20196	-0.34983	-0.921195	-1.11504	-0.318101	0.921272	2.2691	-0.940306	0.58545	0.184102	0.24376	0.584255	-1.35661	0.792976	-0.0289841	-1.12182	-0.904721	-0.678352	0.72497	0.633594	0.0397453	0.293471	1.04478	0.107757	0.672684	0.793213	1.09802	0.76842	2.32182
MAGEB6	-0.628864	-2.73631	-1.48793	1.22214	-0.598265	0.922024	-1.8885	-2.03568	-0.25821	-2.16373	-0.00588512	-2.88436	1.0248	-2.15459	0.27394	0.25833	-1.49408	0.662902	-2.8982	-0.425537	0.81669	-1.22549	0.0832825	1.2185	-2.09893	-2.92258	1.05136	-2.93185	1.71936	0.956072	-2.63175	-2.83466	-0.137737	0.800141	-2.52582	0.915155	1.15367	0.339558	1.38174	1.38596	0.135911	0.670726	1.37502	-0.471372	0.00588465	0.350842
LMNTD1	-0.307447	-0.0921204	-0.450585	0.195778	-0.636373	-1.3062	0.645999	0.578611	0.38257	-0.0767105	-0.507906	-2.46161	-0.23042	0.513288	1.2543	0.00212503	0.725491	-0.118549	-0.0207922	0.0593617	-0.387075	0.572635	0.591024	0.203239	-0.385508	-0.352496	0.367788	-0.882081	-2.23558	-0.264484	0.688115	-0.0701787	-0.8838	0.327369	0.854149	0.825792	0.512611	-0.00212503	-0.270469	1.43057	0.368948	0.770849	0.292406	-0.623306	0.662415	-0.294313
CIRBP-AS1	-0.0523221	0.59259	0.401325	0.524302	-0.196288	-0.346044	0.19677	0.326457	0.565314	0.208279	0.36456	-1.77506	0.607353	-1.49019	0.71357	-0.695926	-0.0839498	0.261046	-1.45011	0.804149	0.517825	0.511653	-0.470564	-0.0698206	0.146973	-1.76357	-0.00966811	0.00118852	-0.0188825	0.0767038	0.432795	-2.34939	0.102933	0.0129921	-0.00118852	-0.0423615	-1.52034	-1.16033	0.8388	-2.44956	-2.43007	-1.87672	0.0396636	-0.380143	-0.71179	0.41364
CD200R1	-2.4192	2.55093	3.06931	1.44144	-0.0854711	-0.95296	-1.62532	-0.251759	-0.596664	-0.855213	0.072917	-0.454676	2.90042	-0.522287	-0.550594	-0.78107	2.20161	-1.33637	0.425717	-0.0300007	-1.02461	-0.252061	-0.986701	-1.32992	-1.17247	1.86174	1.86983	-0.12867	0.74972	3.62878	-0.0493073	0.119458	1.06596	2.43858	2.09004	2.98508	-0.664262	-0.470643	0.0300007	2.5115	3.10334	-1.26771	1.97208	0.248457	2.49646	2.78698
ATOH7	-2.51935	-1.52269	0.449609	-1.66226	0.564525	0.312594	0.0115702	-2.03891	0.970247	-0.308388	-1.91462	-2.27121	-0.406526	0.82137	2.25887	-3.71833	-3.25412	0.86082	0.0713432	1.18462	-1.44672	-0.0115702	0.108468	0.100693	0.403981	0.641912	-2.08076	1.53578	0.774307	-1.88033	-0.39758	0.0948293	1.15949	0.354031	1.74258	-0.58849	-0.689781	-4.03864	0.816182	0.582797	0.147021	-0.369395	-2.12519	-1.92045	-1.91993	-1.88371
AMER1	-0.20917	-0.0914345	0.190401	-0.49094	0.374438	-0.0600839	0.0262423	0.765005	0.736438	0.0735774	0.801287	0.310091	0.33247	0.673116	1.31581	-0.745878	-0.846079	-0.223295	-2.00043	-0.0212684	-0.845053	-1.24275	-1.30481	-0.338161	0.0212684	0.0426412	0.124412	0.330933	-0.0962138	0.420442	-0.235125	-0.475793	-0.0254555	0.040308	0.321072	0.393481	1.1913	0.432792	-0.362193	-0.0567985	-0.419136	0.0885758	-2.66814	-0.56	0.778162	-1.48085
NKX6-3	-0.725102	-0.548279	0.0236876	-0.303729	1.42911	0.483875	1.6331	0.64802	1.35653	-1.29057	-0.416531	-1.33358	-0.773159	1.26154	-0.434808	-1.54172	-0.166795	1.93068	-1.25301	1.47558	2.96	-0.469259	-0.675791	-0.511908	1.44093	0.132758	-0.84974	-1.0388	0.259903	0.830723	-0.829653	-0.745566	0.582895	-0.523338	-0.0236876	2.09478	1.453	0.574279	1.92584	-0.677953	1.02165	2.87209	1.47467	-0.41787	-0.557373	0.923268
TBATA	0.235065	0.602812	-1.01405	1.0661	-0.126003	-0.138672	0.511652	0.00395131	1.3015	-0.120639	0.491745	-1.01675	0.084832	-0.526779	0.405555	0.743319	-0.161929	0.51592	-0.282749	0.270911	0.338058	1.07326	0.709195	-0.163162	-0.0177701	-0.00395131	0.242357	0.111996	-0.147999	-0.0737107	-0.242337	0.624785	-0.784025	0.603506	-0.142323	-0.363377	-0.0474079	-0.421199	-0.332718	0.117919	-0.927876	0.195965	-0.353688	0.466444	0.145606	-0.495332
EXOC3L2	0.0413957	0.127388	-1.31526	0.553673	0.295978	-0.256762	0.00410986	0.313962	0.568221	-0.688318	-0.269735	-0.396144	-0.248447	0.27958	0.493654	0.0665889	-0.594322	-0.235552	-0.599991	0.0598702	-0.00410986	0.439315	0.24257	0.0822368	0.279415	-0.105206	-0.190865	-0.410656	-0.597476	-0.175123	0.436079	-0.17762	-0.0660749	0.716462	0.0412183	0.283127	-0.468196	0.159376	-0.20112	0.743333	0.678636	-0.722717	-0.236673	-1.04839	-0.874494	0.147312
CABP4	0.447927	-1.05938	-0.593008	0.248713	1.69425	0.790435	1.49518	-0.770638	-0.787482	-0.915887	-1.85055	-0.602119	-0.00877809	-0.842272	0.0864925	1.11012	-1.71478	2.27032	1.82821	-0.511464	-0.367044	2.33471	-0.139445	3.64288	0.439071	-0.421348	1.9575	-1.16014	0.312767	2.10987	-0.589581	-0.780061	-1.67326	0.799034	-0.235579	-0.447687	3.09457	1.48514	0.00877809	-0.663911	1.4551	0.151594	-0.471223	0.474349	1.19543	-1.0257
TNFRSF13C	-0.904369	0.174221	2.39925	1.13832	-0.434958	0.818265	0.184998	1.442	1.60173	-0.215855	-0.981141	-1.01004	1.12756	-1.27591	1.46736	-1.81144	-0.00876546	-0.0708158	-0.221579	-1.21073	1.12379	-1.00869	-0.965481	0.550858	1.21473	0.00876546	0.684032	-0.870994	0.137496	-0.503598	0.736898	-2.63918	-1.33537	-1.07087	1.11942	1.27111	1.51132	-0.715538	0.584818	0.572334	0.233855	-0.110141	-0.227651	-0.126096	0.149183	-0.862127
ANKRD30BP2	-0.234755	1.05882	0.619387	-2.8824	-0.942039	-0.0113311	-0.029099	-0.764207	1.19231	-0.295541	-2.19479	-5.15382	0.235153	-4.88273	0.69164	0.480155	-0.162863	0.598327	-0.554638	-3.7394	-0.760013	-0.222218	-0.0409522	0.660172	0.0927253	0.318134	0.278767	-0.84072	0.20716	0.284675	0.0226698	-1.18407	-0.49869	0.0113311	0.246575	0.105811	-0.19103	-3.93997	0.194773	-0.369278	0.372821	-0.0550356	0.0502386	0.690031	0.65766	0.507554
KCNG3	-0.369388	-0.750744	0.34956	1.8407	1.1081	-0.537791	0.0648251	-0.468943	1.12761	0.541575	-0.178755	-0.496439	0.23359	1.36377	1.69969	-0.421213	-1.74177	0.9715	-2.81026	0.874363	-1.87738	1.68351	2.28605	-0.47278	-1.03916	1.13242	1.43788	-2.37624	0.0364656	-1.21566	1.29549	0.7743	0.0762949	0.315931	-1.21402	0.404532	-0.983468	1.35994	-2.91589	2.54649	-0.161697	-0.0364656	-0.998988	-1.1482	-0.0719857	-1.36083
LINC01312	-0.743518	0.0155718	0.156244	-0.0786526	-0.295217	0.197562	0.225454	0.264365	1.02941	-0.252944	-1.13152	0.855265	0.0342109	0.20202	1.03351	-0.271703	-0.361785	-2.02539	0.108365	-0.22322	0.0257876	0.759268	-0.503509	0.125486	0.902101	-0.643765	0.644537	-1.60717	-3.59337	-1.14585	-1.18194	-0.571016	-1.04321	-0.382055	0.331819	-1.74017	0.351033	-1.43914	0.554567	0.379766	-0.228032	-0.0155718	0.497195	1.05783	-0.215111	0.100221
B4GALNT2	-0.82129	-0.0332892	1.30082	1.67825	-0.867269	-1.58109	0.385797	-0.261003	0.155094	-0.538653	0.427411	-4.78286	0.0332892	0.502754	-0.467014	-0.987571	-0.502611	-1.82788	-0.226743	-0.171029	-2.44794	0.350128	-0.310107	-0.194549	-0.327636	0.073642	0.141143	-1.46641	0.794961	-3.14163	1.71068	1.81241	-3.76161	1.39598	0.970838	1.43893	0.347886	0.854339	-0.301447	2.76716	1.23117	-2.29623	-1.33715	1.07573	0.607588	0.885495
FMR1NB	-2.66983	-2.83198	-2.60255	-0.126095	-3.06509	-2.83009	-3.53754	-0.427674	1.44152	-0.920565	-1.21805	-0.123528	-0.162223	-0.0693312	0.906798	0.570996	-1.52719	-1.90192	1.46085	0.578674	1.14039	-1.29357	-1.77667	0.0693307	0.47374	-0.133119	0.986597	1.50338	1.011	-3.35602	-2.5716	0.467702	1.12452	1.0754	0.549806	0.255398	1.04008	0.526866	0.817209	1.07764	-0.761942	-3.32042	0.56591	0.481286	-0.982312	0.896632
GCSAML	-2.14441	0.914198	1.91688	-2.45496	-0.544578	-2.23962	-1.61519	1.33763	2.12873	-0.000195	0.824898	0.000195	0.434194	1.38054	-0.750674	1.2527	-2.14315	0.753427	1.24208	-0.863726	1.32003	0.450686	1.21735	1.20433	-1.77248	0.391426	1.88532	-2.23539	-2.68796	0.36899	-2.11796	0.611495	-0.31018	1.39471	0.587155	-2.51934	0.716619	-1.23845	-1.81701	-0.270967	0.387856	-2.18281	-1.06545	-1.25997	-0.141333	-1.13534
SIGLEC11	-0.371139	0.906723	-0.379865	1.12561	0.164232	1.38127	0.901413	-0.107479	1.19643	0.413645	-0.185335	0.193909	-0.6575	-0.525545	-0.430113	-0.0024786	-1.35189	1.92764	1.68981	1.9282	-1.39023	1.42266	1.78934	-1.37748	2.01271	-0.208951	-0.561656	1.68094	1.36798	-0.254733	2.38084	0.690708	-0.962581	0.170281	-0.784981	-2.16738	1.22545	-2.54071	1.81811	-0.825685	-0.62947	-0.281134	-0.125196	2.14253	0.0024786	-0.335143
IL23R	0.156086	-0.678779	0.849389	0.972312	-2.87868	-1.98624	0.856968	-0.376342	0.298459	-1.02389	0.116866	-0.603854	0.791683	0.389556	1.07699	0.0486574	0.105356	-0.258602	-0.652692	-1.2921	0.461902	0.530904	-0.110055	0.405078	0.0481372	-0.237137	1.11555	-1.13418	-0.0681772	-0.328959	0.347871	0.346029	-0.112617	-0.0481372	-0.409362	-0.592032	-0.389393	-0.901168	-2.43834	0.660259	0.448043	-4.25477	-1.45596	0.809352	0.0588682	0.863135
MAGEB18	-0.453453	-0.838158	-2.29131	0.0663595	0.938483	-1.12293	1.37257	-0.0457926	2.26844	1.82096	0.247333	2.31887	-2.63756	-0.153785	1.94208	2.28052	-2.41872	1.0442	1.37288	0.561051	-2.70394	0.471404	1.02718	1.13761	-0.612829	0.0457931	-1.86171	1.8242	1.45815	-1.99761	-0.0788355	-2.24309	-2.58208	-2.53574	0.581255	-2.59091	-1.89461	-2.32468	-1.89848	1.65705	-1.3857	-1.9155	2.10052	3.04178	1.03767	-0.191514
IFNL2	-1.6316	-0.0101809	0.425132	0.172538	0.085422	0.0423565	0.261262	-1.73762	0.0603566	-1.69654	-3.79904	-0.297024	0.450233	0.310566	1.45282	-1.00237	-0.976533	-1.56136	0.0901113	0.394501	0.260271	0.00473881	0.342617	-1.79253	0.574547	-0.149497	0.131723	-0.351967	0.123534	0.435324	-0.123496	-0.0260096	-0.692782	0.323517	-0.157708	-0.00473881	-0.94919	0.107108	-0.537486	-0.0123177	0.854717	-0.536907	-0.971708	0.619993	0.429252	-1.23433
IFNL1	0.0552788	0.724831	0.576173	-0.0577946	0.157015	-0.290485	0.687253	-1.97685	-0.11561	0.221873	0.119433	0.174791	-1.14771	0.435236	1.32955	0.163537	0.701967	0.178505	-0.150392	-2.10735	-0.0945592	-0.342546	-0.172294	1.04977	0.637749	0.195325	0.015697	0.619777	0.826463	-0.880023	-1.52019	-0.634144	-0.597388	-0.466523	-0.424697	-0.015697	-0.269105	-0.409708	-0.512345	0.803035	-0.357698	0.165151	-0.0486851	-3.21685	0.723972	0.454733
C4orf36	-0.581712	-2.39392	1.11029	-0.293928	-1.14296	0.422811	0.535302	-2.46305	-1.1378	0.223781	-0.48364	-0.629759	0.0631971	-2.76878	0.774991	-0.094285	1.38422	-0.300546	-3.74154	-0.0417886	-1.99403	0.22146	-0.310064	1.37699	0.270976	-3.88799	-2.49886	-0.834194	-3.48812	2.07611	1.49507	1.22158	-2.41664	-1.4192	1.37544	-0.180824	0.936494	0.58224	-0.651128	1.51701	1.31958	0.845518	1.38803	0.0417881	1.19155	0.146662
RIMS1	-1.63323	1.81076	-0.00488472	3.40229	-0.602513	-1.17455	0.563837	1.41011	1.1325	-0.134892	0.620531	0.13168	0.780892	-0.46178	0.00488472	-0.662277	2.125	-0.523473	1.09383	-0.575437	-1.18924	-0.121661	0.680834	1.68516	-0.19873	-0.21902	2.87011	1.28593	3.04382	-1.39689	-0.691406	-0.101647	2.90538	-0.875422	0.0440559	-0.00550938	-0.400519	-1.14274	-0.378613	-1.10204	2.10684	-0.813092	0.334295	0.58418	1.86722	0.180436
TAB3	-0.397368	0.126361	0.383202	-0.316523	-0.469422	-1.04925	0.0721009	0.643746	-0.723925	0.0838716	-0.216879	-0.439003	-0.485581	-0.164086	0.00431895	-0.643829	0.340736	-0.00431895	0.606365	0.359245	-0.457531	-0.166264	0.638569	-0.174264	-0.0956981	0.403768	-0.301056	-0.0883491	0.036269	1.06884	0.580559	0.954238	0.74591	-0.0667441	-0.174724	0.367109	0.636708	-0.261863	0.802982	-0.206383	0.766289	0.727689	-0.06056	0.147305	-0.326395	0.347473
GRK7	0.827292	1.17352	1.65842	-1.19067	-1.71581	1.21016	-1.53389	-1.81168	1.88367	0.750785	-0.751739	0.674727	-0.991508	-0.291026	1.53748	1.75231	1.57873	2.13662	-2.42071	-2.71079	1.39472	0.116749	-1.09385	-3.20822	-3.27329	1.93374	-0.0307512	-1.15924	-0.782741	1.23422	1.53095	-0.61037	-1.15995	-0.457262	0.0307512	1.1344	-1.20256	-3.04366	-1.37284	1.61101	-3.36567	1.20868	-1.23945	1.90264	0.470161	1.29813
MMEL1	-0.113719	-0.236618	0.545467	0.391131	-0.608159	0.364074	0.610687	0.746898	-0.105942	-0.263698	-0.353726	-1.21289	0.194627	-0.0972185	0.430692	-0.538162	-0.497111	-0.301343	0.255887	0.816772	-0.328525	-0.188377	-0.906297	0.135463	-0.448988	-0.172775	0.176346	-0.933414	0.00642014	-0.12318	-0.00642014	0.129227	-0.0248852	0.0782356	0.162279	0.334404	0.221016	0.520061	-0.0422201	0.677476	0.355795	-0.27927	0.338746	-0.0504312	0.398932	0.669434
PDE8A	-0.149956	-0.984524	0.347802	0.473376	-0.0586405	-0.174779	0.234286	-0.659073	-0.0508108	0.167068	-0.215217	-0.228639	0.528271	-0.239973	-0.167334	0.531486	-0.37956	-0.133947	0.510828	-0.788077	0.442223	0.841698	-0.0251312	-0.0179386	-0.0535707	0.654132	0.686096	0.248971	0.163414	0.555558	0.650266	-0.125813	0.442233	0.746396	0.679684	0.931142	-0.330369	0.128091	-0.187455	0.0179386	0.859364	0.228061	-0.0230803	-0.165409	-0.0492139	-0.778129
NLRP6	0.878308	1.10532	0.899482	-1.19826	-1.03686	-2.47672	0.471917	-0.976063	0.533954	-1.88321	-3.26636	0.584341	0.753713	-2.40006	-0.220271	0.943158	-2.96787	-2.71749	-1.57386	1.17238	0.646169	0.275772	0.0179567	0.822769	-0.0179563	0.551999	0.748743	0.686258	0.349885	0.296802	-2.28552	-1.74105	-2.09744	0.891515	1.28736	-1.75062	-1.61227	-1.79175	0.653204	0.803946	-3.24006	-1.61066	-2.14354	1.46354	-1.30974	-1.79087
RTL3	-0.758481	-0.243602	0.553249	-0.0909548	-0.741481	-0.841748	-0.301188	-0.0694909	-0.0790992	-1.16629	-0.332677	-0.449767	0.617975	-0.0246844	0.108615	-0.192806	-0.135698	-0.208938	0.201472	0.299572	0.125091	0.160903	0.67489	0.621787	-0.336145	-0.480299	-0.839708	0.122339	0.566172	-0.458971	-0.172946	0.484929	-0.485754	0.393839	0.663035	0.0246844	-0.727921	-0.157842	0.631697	0.547721	0.413188	0.126469	0.505008	1.2952	0.241639	0.224156
ZIC5	0.773775	-0.66177	1.5373	0.235948	0.674279	0.679247	-1.72329	1.37396	-1.10541	-1.12181	0.689741	-0.578321	1.0733	-0.464377	-1.08465	-1.07001	-0.114642	-1.72342	1.37989	1.78756	1.60613	0.589525	0.849464	1.48037	1.58753	-2.56468	-1.04028	0.0879388	0.359551	-0.37543	-1.77184	0.494417	-0.293523	-0.342166	-1.02482	-0.137941	0.354657	-3.09602	-1.33491	-2.35491	-0.0879388	0.650859	1.27629	1.42966	-1.3601	1.95254
TEDDM1	-4.26468	-0.543283	0.371971	-0.137465	-1.37382	-3.09739	0.852171	-3.75954	0.23421	0.75632	0.176097	0.584285	-2.45045	-2.13961	-2.49373	-2.05949	-1.3322	-1.87205	-4.63357	-1.91204	0.655715	0.119575	0.199158	0.370852	1.21416	-2.72416	0.71956	-0.0493059	-2.82569	0.0315742	-1.48799	1.40136	0.739871	0.117131	1.26474	-1.11594	0.540231	1.42822	-0.315979	0.23748	1.42451	-2.11642	0.622267	1.23024	-0.0315738	-1.24989
LOC149373	-0.662487	-0.962326	-0.483357	0.0828247	-0.339817	-0.306978	0.27438	0.382621	1.01686	-0.856439	0.119778	-0.273055	-0.000452	0.12716	1.07258	-0.600566	-0.0806713	0.00931787	-0.157575	0.295786	-0.056438	0.185005	0.145717	0.291849	0.468707	-0.20153	-0.343992	-0.796723	0.0434995	0.138779	0.149629	-0.352318	-0.299871	0.156573	-0.213662	-0.521033	-0.285791	0.000452	-0.0899262	0.7102	-0.105694	0.148778	0.0918665	-0.113499	1.17323	0.709441
GABRG1	-0.132695	-1.99235	0.859749	-2.56618	0.533206	-0.0716548	0.151801	0.676996	2.54032	0.252652	-2.25642	-2.43322	-2.73826	0.628558	1.44907	-3.01156	-2.45761	1.67929	1.30075	1.98147	-1.59439	-1.67515	-0.0461068	-1.61863	1.52125	0.685923	0.626455	-0.952464	0.0461068	1.4976	-2.76419	-2.30738	-1.90959	2.03042	0.858204	1.1036	-1.733	-2.72284	-0.108528	1.23256	-1.64006	1.55508	-0.680145	1.7739	-1.27699	1.77435
PANX2	-0.118927	0.183089	-0.253253	-0.352911	0.859057	-0.239969	0.48877	0.433284	0.726364	-0.0786064	0.128994	-0.777282	-0.280787	0.0449169	0.496456	0.0673859	-0.197576	-0.133864	-0.581667	0.273695	0.126219	-0.32195	0.0972297	0.311157	0.314163	-0.185402	-0.191885	-0.905209	0.464198	-0.807699	-0.0449169	-0.613	-0.131383	-0.226517	0.176424	-0.359657	0.279571	-0.236907	0.232867	0.373648	-0.202348	0.234542	-0.0807292	0.674872	0.142125	1.50204
ZNF114	2.7688	0.00670552	1.49861	0.72599	0.677011	-0.817037	0.0515211	1.40298	2.4565	1.86478	-0.772273	-0.700604	-0.34352	0.535989	-2.24148	-1.23421	-2.01988	0.416972	0.0778425	0.231656	2.53395	1.15262	-1.2309	-0.735803	-3.43726	2.14483	0.52008	0.235421	-0.707984	-0.718798	-0.787433	-0.00670552	-1.73383	-0.740637	1.6687	-0.364116	1.70981	-0.492823	-1.88827	0.408993	-0.622314	-0.115476	0.185101	1.73936	-3.26047	-2.96532
CCDC27	-0.765725	0.423697	0.331818	-0.30048	-0.0415521	-0.472328	1.75396	-0.378279	1.12024	-0.385692	-0.0237823	0.0237823	-0.815182	2.45631	0.0823412	0.333669	0.730896	-0.788553	-1.04654	0.423281	0.551311	0.117914	-0.923009	0.153803	0.619758	-1.0539	-0.105269	-0.407197	2.47339	-0.818626	-1.44541	0.361139	-0.950152	1.99453	2.09163	0.520204	-1.1456	0.432594	-0.21515	0.273051	-0.258049	-0.576953	-0.820586	-0.0254455	0.772887	1.91166
CFAP161	-2.74935	0.132674	-1.87754	-3.72066	-0.187412	-1.73303	0.63669	0.698854	0.591718	-1.95043	-0.130691	-0.0127306	0.145527	-2.41455	2.23913	-2.1718	-1.48043	0.212775	0.538956	0.69323	0.275006	1.52914	-1.5535	1.26501	0.304752	-0.225977	0.0333056	0.720106	-0.966309	-1.41224	0.150274	0.493128	-0.69484	1.42332	0.0127301	-2.64381	1.25633	0.803943	0.405515	-1.96765	-2.98328	-0.242415	-1.12077	1.05459	-0.673042	-1.80023
NEUROD2	-1.61739	-0.743665	-3.03805	-4.45256	0.428991	0.525336	1.17847	-0.198271	0.505551	0.0156574	-0.442637	-0.256054	-0.0147047	-0.25356	1.23296	0.13148	-0.991799	0.109122	0.398312	-0.292169	1.34834	-0.242719	0.784722	-1.5651	0.0309119	0.241173	0.14887	0.233321	0.512416	-0.473284	-0.41232	-0.248407	-2.66675	0.210433	-1.2242	0.405558	-2.57653	-1.06221	-0.984066	0.660417	-0.653773	0.226743	0.0147047	0.840711	0.100222	-0.306552
C5orf17	-0.571618	1.74271	1.35959	-2.62405	0.6553	-1.91001	-0.0366149	1.65381	-2.14101	0.0818672	-1.86586	-1.1183	1.98932	0.562244	1.25089	0.342597	0.295897	1.19219	-0.420016	0.920687	-2.52554	1.44252	-0.169449	0.548045	1.15094	-0.0227442	2.03933	-1.71523	-0.876946	-0.367345	0.0227447	-1.48451	0.186701	0.061748	0.469113	-2.83625	-1.46562	0.371108	-0.234649	-1.25626	-2.6026	-0.580693	-1.50303	-0.494955	1.04435	1.42607
LINC00208	0.0196924	-0.122912	-0.0785289	-2.03332	-0.198946	-0.111868	-0.00141001	0.649707	0.404045	-1.29804	-1.73898	-2.82232	0.506791	-3.70852	0.0688238	0.855814	-0.782439	-2.47413	0.30547	0.239813	-0.218744	0.275411	-1.596	0.573747	-1.78871	-1.2703	-0.0148644	-0.0865464	1.21402	-0.15465	0.419587	-0.233271	-0.149203	0.0465784	-3.60681	-0.250559	1.28923	0.666842	0.901577	0.111819	0.536174	0.228714	0.00141001	0.409771	0.59177	1.18162
CBLL2	-0.447601	0.111649	0.159814	0.112818	-0.393958	-0.114705	0.14151	-0.365002	-0.199675	-0.472094	-0.337579	0.0824077	-0.104686	-3.13695	0.92715	-0.122436	-0.580115	-0.60619	-0.0390394	0.37671	-0.439574	0.324071	0.268735	0.517197	0.584568	-0.204699	0.322073	0.0390394	0.540106	-0.355757	0.376019	-0.663711	-0.736008	-0.235735	0.239305	0.131321	-0.743734	-1.34124	-0.24842	0.547184	-0.186944	0.16302	0.165208	0.828495	0.391069	0.796213
SGCZ	-1.94381	0.152947	-2.10447	0.928024	0.922214	-1.70742	-1.67507	0.405015	-0.0759296	-0.991558	-0.451389	-2.42496	1.37018	-1.487	3.389	1.4798	1.81469	-1.02774	-1.92161	2.38685	2.52518	0.885273	-0.283097	-1.26628	0.827064	-2.09908	0.0759301	1.17313	0.454955	1.53481	-0.230264	-1.01295	2.16674	-0.582401	-0.126664	2.09912	0.34211	-0.592747	-1.22496	0.779346	1.36819	1.13291	-0.709823	-0.370535	-0.610106	1.70687
LINC02551	-2.4423	2.33416	0.850761	1.58416	2.20565	1.45233	1.84752	-1.87071	-0.0267463	-2.4057	0.294111	-1.14355	1.19218	-0.269397	2.16842	0.526575	2.11468	2.2219	2.44826	-0.883054	-2.3217	-2.58247	2.27459	0.0267458	-2.04054	-1.32363	-2.53061	1.81917	-2.46004	-0.896807	0.758122	-2.42243	-2.45719	0.114981	0.60264	1.77998	-2.44488	-1.55674	-2.40679	1.1729	-2.52465	-0.974372	-0.398431	2.30579	2.20536	-0.0666242
WNT9B	0.47995	-1.91303	0.707437	0.648876	0.839862	-0.0428057	0.424146	-0.79106	0.975763	-0.538431	0.923033	-0.761837	2.76739	0.299766	0.951791	-0.804324	1.21144	0.0428057	2.46331	0.313622	0.78545	0.2923	-0.820871	0.971736	-0.315233	-0.186337	1.01092	0.11642	0.787318	-1.89631	-0.704389	-0.272231	0.673341	-0.801327	-0.680031	-0.631142	-0.339495	0.194442	0.475401	-1.21166	-1.78588	-1.94048	-1.07032	-0.610905	-0.951515	-0.257598
DNAJB13	0.0225911	0.134442	0.179307	0.291064	0.173801	0.0455089	0.185288	0.311693	0.952818	0.209153	-0.421449	-0.457812	-0.0162854	-0.355223	0.786361	-0.116515	-0.151068	-0.266104	-0.0814395	0.227797	0.0162854	0.0736246	0.447735	0.487898	-0.0172291	-0.412313	-0.484281	0.186331	0.50928	0.168278	0.126163	-0.0433192	-0.124381	-0.0986619	-0.150197	-0.129762	-0.261901	0.243358	0.0168433	0.6737	-0.318405	-0.240141	-0.146884	-0.488254	-0.936785	-0.399139
LINC00471	-1.31538	3.36295	0.385757	0.298362	-1.00799	-1.11246	-0.826813	1.9167	2.83043	-0.313085	0.135481	0.13385	1.31813	-1.89325	1.1499	0.245004	-2.03161	-0.842001	-0.93009	1.67891	-0.744531	0.0531387	-1.61926	1.55204	0.921882	0.184669	-0.847694	0.473545	1.09806	0.126549	-1.53619	-0.4006	-1.99137	-0.846187	0.0450716	0.486894	-0.0450716	-2.18882	-2.14457	-0.792254	-0.764692	0.831116	-0.136209	0.203078	-0.0941586	0.195597
FGF4	-1.03991	1.25367	-0.785398	1.97351	-1.7953	2.19047	-1.32706	0.0473309	0.0872812	1.22082	2.01294	-0.667196	-0.31391	-0.0473313	1.78516	-0.840445	0.12395	-1.68883	2.13192	-0.162976	0.511243	-0.25525	1.74972	2.39906	-0.867294	-0.153426	1.76489	-0.49421	-0.226612	-0.740154	0.480679	-0.780368	-0.356424	1.14634	-0.9522	2.26802	1.87711	0.978851	-1.7623	-0.358653	-0.636452	1.91208	1.91355	0.322135	-0.563101	2.43008
SLC30A8	0.113242	-0.814091	0.208176	-2.1744	-0.223213	-0.890168	0.11554	0.684768	0.675206	0.00902677	0.0125606	-0.427582	-0.1919	0.192708	0.806344	0.415926	-0.54311	-3.05774	0.289404	0.680243	-1.2519	-0.311694	0.295845	-0.999479	0.452389	-0.00477719	-0.391254	-0.130684	0.543676	-0.590367	0.541326	0.327667	0.0126698	-0.358906	-0.580587	0.162125	-0.640967	-0.579243	0.625649	-2.35335	0.00477719	-0.0302289	0.383402	0.591468	-1.98417	-1.10624
LOC439933	0.800277	0.556979	2.30784	-1.07729	-2.07105	-1.50781	-1.64345	-2.18847	1.71348	1.8723	-1.35264	-1.21608	-1.35893	1.97229	1.49556	0.405065	-2.5325	0.788671	-1.36878	2.31439	-1.00557	-2.80581	-1.1944	1.04737	-0.526098	0.297813	0.881941	-1.09581	-2.69871	2.19568	2.45218	1.19464	2.61069	-2.74658	1.94801	-0.499332	2.76656	2.03312	-2.64546	1.75773	-2.76332	2.25771	1.9399	-0.297814	-0.600442	-0.305295
C11orf65	-0.145389	1.43437	-2.4222	0.204692	-4.41214	-0.103161	-0.822819	-1.53353	-4.07691	0.00606298	-1.16225	-0.567807	0.604994	0.75769	1.08509	-0.437744	-1.7362	-0.572442	-0.747516	0.374383	0.140489	-1.48419	0.951886	-2.54793	-0.0171461	0.547843	-0.00606346	-0.146168	-0.794334	0.984769	-0.088357	0.19142	0.388019	-2.45508	0.459772	0.895903	1.22562	0.228215	0.53346	1.30812	-1.40912	1.45948	0.386421	-1.92147	1.38809	1.71239
OR5P2	-2.83298	-1.65749	0.515797	1.03142	-0.833781	0.736124	0.0959277	0.751931	-2.17648	-1.53017	0.400288	0.476279	0.0845861	-0.710102	-1.25911	0.238586	0.887868	-3.17303	-1.88837	-0.440615	0.331909	-1.87228	1.45584	-1.84034	-0.255528	-2.18167	-3.55736	0.534307	0.482481	1.15375	-2.31884	-0.440997	-0.0524363	-0.87768	0.850082	-1.14587	-2.49909	0.0524359	1.16277	0.477286	0.75986	-1.15423	0.600704	-0.234143	1.29322	1.84204
DYDC1	-0.716143	0.297209	-1.34464	0.594802	0.424182	-0.493788	-0.608198	-0.725608	0.890788	-0.401504	-0.0582657	-0.000813	-1.02319	-0.678305	0.328384	0.0833669	0.000813	1.23467	1.43132	3.20067	-0.556394	-1.9728	0.058198	-0.305185	-0.957872	-2.21202	2.23664	2.28971	-1.13002	-1.11971	-1.73655	-0.0415902	-0.793725	-0.426509	0.0581722	0.252068	1.6335	-0.122218	2.36632	3.09112	-0.630744	0.8957	2.73361	0.239189	3.884	0.231708
IL27	1.43545	2.16361	-1.51808	0.737136	1.7219	2.53495	1.26041	0.70807	-0.794653	0.740741	-1.33894	-0.373752	1.62157	-1.56604	1.7274	0.393181	0.127192	1.01278	0.0508294	1.68953	-0.111595	-1.1196	-1.51029	-0.798882	-0.770297	-1.5532	-1.68418	-0.510667	-0.706414	-0.0508294	-1.4026	-0.63932	-0.0931139	-0.281246	1.63962	-0.949263	2.54353	-1.42032	1.88739	-0.681427	2.91457	0.577489	-1.35025	2.37871	2.68534	0.190068
DEFB125	-0.994058	-2.24034	-0.70652	-0.236392	-0.0861273	1.27031	-0.330351	-0.609711	0.629422	-1.14194	-0.972698	-2.04401	0.305402	0.600296	0.172375	-0.450548	1.94063	-1.57756	-0.288877	3.00443	-0.573443	0.682515	0.276339	0.397645	-1.00458	-0.683229	-1.73961	-0.522524	3.40853	-2.01415	0.142234	0.0861278	-0.355395	2.93761	-0.332084	-0.561353	0.881814	-0.757101	0.302514	2.23798	0.0932498	0.709338	1.00902	2.94947	3.09733	2.57816
WFDC10B	-2.98393	0.932772	-0.759706	0.516945	-1.18963	-1.7323	-1.30773	1.37821	0.577802	-2.58529	-0.564047	-1.85077	-0.526412	-0.684969	-1.93253	-2.55358	0.526573	1.03708	0.761706	1.4633	0.686213	-0.795835	0.777737	1.38473	1.75043	-3.02911	-2.75658	1.51793	1.22478	1.86715	1.05149	2.15674	-2.35895	-1.64721	0.162681	-2.73145	1.11385	0.435208	-2.57453	0.59724	-0.162681	0.944575	-0.18011	-2.09797	-2.16776	2.7517
ADGRG4	-1.62151	-0.222414	-0.502015	-0.0124097	-2.28324	0.0575471	1.42302	1.33863	0.241725	-2.14682	1.73661	1.21965	-1.55395	-0.411137	2.74702	1.91442	2.1749	-1.36259	-1.68441	1.25458	1.01556	-0.13103	0.79726	-1.83212	0.0368457	-1.01015	-0.321992	-1.0771	2.66608	0.0124097	-0.930955	2.63507	0.791914	2.264	2.53777	0.279058	-0.579814	2.34	-1.25706	0.290067	-1.01015	-0.549304	-0.624724	0.360939	-0.235712	-1.10616
TENM1	-1.25016	-0.706647	0.100625	1.34693	0.590327	1.14489	0.641649	0.840309	-0.621641	0.374866	-0.259223	-0.58005	1.1267	-0.206081	-0.124703	-0.15564	-0.877168	-0.415721	-0.238109	0.0251741	1.71377	0.343039	-0.870999	2.78635	2.00503	-0.973798	-0.288816	1.15473	0.25177	0.42035	2.15928	0.196781	0.125866	-1.26967	0.275526	-0.455086	-0.203846	1.95309	-0.566715	-0.508059	-1.06462	-0.104684	-0.23927	-0.0251737	0.877157	0.597433
REXO1L1P	-0.661039	0.216164	-0.00808573	0.319221	-0.152545	-0.124194	-0.29604	-0.452147	0.460016	-0.0674043	-0.334505	-0.209218	0.671404	-0.112208	0.111814	0.477707	-0.0915461	-0.154062	-0.201061	0.0751739	0.156957	-0.139174	-0.370201	0.0518756	0.101468	0.0537386	-0.595632	-0.520178	-0.0299821	1.69396	3.03621	0.00808573	-0.33612	0.408367	1.01353	0.341967	-0.248837	-0.0187359	-0.368393	1.66125	-0.482313	1.25667	0.221667	0.560954	0.432117	1.17589
TAF1L	-1.50214	-0.736904	1.39396	-0.525109	-0.39128	0.165335	0.617762	-0.919128	0.0365841	-0.767023	-1.12123	0.317783	0.336427	-0.30418	1.05618	0.674269	0.590481	-1.38807	-1.24188	1.32981	1.33324	0.374216	-0.985066	-0.666919	0.90295	-0.831148	-0.238042	-2.51681	-0.376931	-0.0365841	-0.826045	-0.228199	-2.80952	0.323108	-1.82021	-0.127289	0.943115	1.16224	1.63568	1.43424	-0.398209	1.14573	0.334085	0.539946	1.29194	1.36798
RECQL4	0.489884	-0.249832	-0.789171	-0.361515	0.405365	-0.251749	-0.56805	0.465619	-0.0987406	0.471068	0.591311	0.0393963	-0.354858	0.0361395	0.368092	0.373693	-0.1858	-0.374271	0.50794	-0.0191164	0.752147	-0.307782	-0.207433	0.731238	0.624312	0.358332	-1.28688	0.534103	0.0126591	-0.0126591	-0.817106	-0.072938	0.050211	-0.337088	0.0273209	-0.762486	0.104194	0.52051	0.462988	-1.39456	-0.117616	0.0789118	-0.267056	-0.592091	0.350777	-0.711056
TMC2	-0.295322	0.0477586	-0.414164	-2.4806	-0.0199776	-1.70486	-0.334138	1.32018	-1.36998	0.287631	-1.60709	0.308165	-0.932837	1.27657	1.07069	0.0199776	-1.63758	-1.23137	0.506001	0.411623	-0.496549	1.07723	0.771841	-0.704238	-1.90519	-0.992804	-2.62742	0.772354	-1.37594	-0.585555	-0.48446	1.56709	0.58065	-0.600686	0.691205	1.45823	0.849875	1.54012	0.993194	0.186808	0.360965	0.710773	-1.39725	1.20709	-0.581499	-1.07479
SMCR5	-0.809936	-0.116641	0.473123	0.0585008	-1.04971	-0.527805	-0.107651	-0.545907	-3.09878	-1.33222	-0.930153	0.338194	-2.64986	-0.879795	0.923638	-2.12746	-3.58527	-1.19026	0.295462	-0.0155687	0.211876	0.237928	0.0155687	0.259499	0.704334	-0.816606	-4.25515	0.056231	-0.0462031	0.388003	0.246002	0.835596	0.520279	0.716024	-0.962023	-0.341936	-0.283302	0.459748	0.180145	1.19726	-0.729056	0.52439	0.525417	0.706494	-1.72484	1.21599
ZIM3	1.36742	0.122542	0.73925	-1.60842	0.386184	-0.371495	1.03672	-0.352034	-0.280312	-1.17861	1.07991	1.52535	0.026978	-0.998154	-0.730846	1.08445	0.388958	-2.40269	-1.72958	2.44438	-2.49273	-0.836816	-2.31951	1.13521	1.03746	-1.57518	-2.04022	-0.486951	-1.79841	-1.58818	2.49969	2.53452	-2.19057	2.46064	2.64384	1.60071	-0.371428	-1.409	2.32652	0.451484	-2.14928	-0.026978	2.44327	0.0271769	-0.275452	0.572303
DAOA-AS1	-3.23643	0.466879	-1.66708	0.327268	-1.73772	0.795679	1.01285	0.137249	2.45631	0.166045	-0.542831	-2.34754	-1.73526	-0.856607	1.42427	-0.690296	-3.08796	-3.01145	0.711667	0.66122	-1.46579	1.67475	-3.35589	0.469908	-1.17928	0.383611	-1.58687	1.20565	1.5687	1.27544	0.00786877	-1.50278	-0.0510225	1.09397	-2.35751	-2.77417	-2.75195	-0.00786877	0.267394	-3.2801	-0.887248	1.42195	0.419946	2.63706	-0.330163	0.645741
KLHL4	-1.33334	-0.076344	-0.638624	0.380197	2.85693	-1.29794	0.348412	-0.634366	0.828335	-1.00755	-0.249183	-0.0144773	-0.765801	0.717207	2.84658	-0.221434	-0.140384	2.54141	0.739395	0.0144777	-1.23037	-0.0968294	1.75948	0.446727	-1.71427	0.24641	2.39466	0.0345926	-0.352087	0.666481	0.70487	3.14992	-0.40775	-0.100401	0.24961	0.612644	-0.474733	1.04732	-1.1565	-0.924509	2.06347	-0.0197949	0.0550504	0.0320764	-0.224418	-0.0298114
GPR156	-0.730583	0.599125	-0.938407	-0.0446634	1.09075	1.31201	2.17421	-0.937017	-1.83105	-0.577435	1.5147	1.07854	0.759459	-0.271993	0.126287	-0.740251	-0.168551	0.327211	0.455807	2.08505	-0.372432	-0.734101	-0.485259	0.993532	1.95786	1.95221	-0.0323763	-0.447229	-0.704428	-0.27251	1.92223	-0.0915098	1.87983	-0.629223	-0.141665	2.1155	-0.485695	1.12858	0.675042	2.86812	-0.626123	0.0323768	0.372395	-1.58253	-0.456603	0.752347
SUOX	0.26938	-0.0126476	-0.770782	0.207171	-0.145035	1.37802	0.0170994	-0.119037	-0.703397	0.23635	-0.132418	-0.127965	-0.190188	-0.0833769	0.060071	-0.0950537	0.0126476	0.134005	-0.324985	0.54653	-0.672181	-0.168857	-0.131689	-0.140504	-0.0963511	0.349175	-0.237517	-0.345856	0.692794	0.0407009	-0.017364	0.340131	0.496008	-0.409509	0.242117	0.205433	1.12246	0.791842	0.281284	-0.433581	0.386466	0.139193	0.375983	0.135132	-0.196484	-0.249341
SYTL5	0.0323915	0.370809	1.18797	-0.115942	-2.67527	-0.421361	-0.136091	-1.31976	1.10329	-1.48705	-4.37761	-4.29837	0.583963	0.563989	0.468403	-3.36254	-3.08118	-2.10199	-1.46397	0.0190382	0.369162	0.874834	-0.663099	-0.245791	0.69239	-1.66367	0.59372	-2.16738	-0.173297	1.17232	1.76447	1.35931	0.527232	1.61748	0.0370183	1.90649	3.19678	-0.393971	-0.145693	3.58138	0.863851	-4.85346	-0.291442	0.11455	-0.276363	-0.0190382
ADGRF2	-2.18622	-0.678947	-1.28915	1.56332	-1.26876	-1.80932	-0.711382	2.07551	1.87336	1.79054	-0.920894	0.265607	1.92336	0.536524	-0.0675106	-0.632163	2.1313	-1.93304	-1.94278	1.30467	2.04343	1.25656	0.5195	-0.460474	-0.131501	-1.2393	2.96675	2.11106	-0.775079	1.86204	0.000645	-0.146484	-0.851806	-0.501219	2.16454	0.112999	2.28398	-1.08344	-0.464187	0.365345	-0.140733	-0.000644	0.342065	2.75223	2.40776	-0.1066
HTR3C	-1.12547	-0.672247	-0.623709	0.655488	0.142457	-0.871649	-0.107731	0.553125	0.284395	-1.24879	-0.890406	-0.148516	-0.453457	0.386009	-0.579401	0.485176	0.580583	-0.373914	0.0902481	-0.848688	1.01798	-0.161688	0.907408	1.12545	0.0164547	-1.51432	0.46563	-0.16548	1.1032	0.387244	-0.0164552	0.633632	-0.724438	-0.904533	1.01273	-0.371554	-0.0456681	1.39935	-0.112098	0.0641432	2.7851	-0.316177	-0.358835	1.07775	1.33592	0.946869
CD300LF	-0.290112	0.301203	0.420595	0.560508	0.509865	-0.673378	-0.812045	-0.185636	1.50195	-0.606751	-0.972755	0.353864	0.890153	1.16187	-0.321943	-0.430653	-0.750792	0.550925	0.0715475	-0.134134	1.47999	1.23743	1.06858	-0.761848	0.423389	0.815386	1.54095	1.00058	-0.967512	-0.237481	0.135383	-1.21797	0.214677	1.12976	-0.0715475	-0.0723176	-1.1185	-0.503412	-1.25526	0.177957	0.520416	-1.11926	-0.153429	-0.204484	0.265685	-0.77807
GJA10	-0.380908	-1.50345	-2.17197	-0.0782881	-1.20134	0.0802116	0.640686	0.407829	1.00097	-2.07513	-0.162896	0.000415	-1.39752	0.869101	1.50686	1.34744	-1.89088	-1.52043	-2.39077	0.146242	-0.6138	0.180861	0.230204	0.134118	0.827174	0.853537	-3.80239	0.893747	0.917726	0.612321	-0.125422	0.609269	0.594341	-0.233171	-1.47891	0.777051	0.752893	-2.75412	0.29912	-0.000415	-0.508397	-1.60087	-0.284154	0.363913	-0.625794	-2.10845
WNT9A	1.83756	0.69101	0.107519	0.734216	-1.49868	2.36923	1.93261	-0.898403	0.152562	-2.15363	-0.369185	-0.134345	0.468492	1.48624	-0.377442	-2.31814	-0.34629	2.157	2.01333	-1.44402	0.0455985	-0.346976	-0.969901	0.0822787	0.275095	-1.35591	0.161604	-0.567074	2.67712	-0.045599	-0.873015	0.191348	-1.1317	-1.1796	-0.971547	-0.221385	0.465158	-1.08316	1.37856	-0.738621	-0.844733	1.00877	1.21098	3.13733	-0.152073	2.46063
GAL3ST2	-0.355561	1.00569	-0.830442	1.29751	-1.71162	0.965243	0.228031	-1.29886	-0.285792	-0.436893	1.75978	-0.83027	0.368181	0.0566258	1.76432	0.0689807	-0.645629	0.304532	0.216482	-0.131308	1.75205	0.0369101	-0.412839	1.30552	-1.34244	-0.570138	0.0680408	-0.368332	-0.0369101	-0.521403	-1.72854	-1.23973	-0.188045	2.43968	-0.170047	1.83135	-0.261525	-0.503022	-0.531209	1.39861	-0.462644	2.36217	2.178	2.22715	0.951453	0.602407
PIP4K2B	0.0826287	-0.347153	-0.178094	-0.239776	0.126437	-0.634441	-0.0415373	0.101015	-0.46038	0.0011301	0.0985904	0.152594	-0.233407	-0.374002	-0.0300312	-0.0346179	0.745138	-0.532971	-0.729461	2.72553	-0.752083	-0.178628	0.0731969	-0.0526695	0.379749	-0.101522	-0.0011301	-0.143906	-0.21132	0.579957	0.542194	0.669004	0.331378	0.958613	0.828858	0.400948	0.265804	0.457449	0.898816	0.663423	1.12595	-0.0212593	0.0860386	-0.148317	-0.394356	-1.02666
ODF3	-1.04068	-0.129106	1.04857	-0.932177	-1.49532	0.876625	-1.16091	0.743779	2.10962	-1.22272	-0.974246	1.91305	-1.01898	-0.891744	-0.840328	1.35579	-0.0854964	1.39637	-0.793814	0.695644	1.80629	1.38903	-0.0933771	2.02243	2.312	-0.0860763	-2.17381	1.54646	-0.190926	1.81014	2.41336	-0.487082	-0.79715	1.97125	0.0854964	1.15537	-0.508139	0.144463	-0.237613	1.48764	-0.743792	-0.560962	-1.33521	0.629687	0.119781	2.02524
WFDC13	-1.25667	0.363083	0.408375	0.0232291	-0.327218	1.23681	0.765036	-0.670334	-0.0232291	0.250556	-0.403081	-1.06028	2.41963	3.09953	1.15014	1.09476	-0.182957	-2.16478	0.835406	0.70239	1.74572	0.12067	-0.590421	-0.581325	-0.407083	0.169927	1.8703	-1.56231	-0.400353	-0.478396	0.262933	0.439296	-0.912362	-0.195676	-0.835428	-1.34985	-1.58933	-1.42509	-0.20038	0.944054	-1.34694	1.8699	0.184401	2.04363	2.25157	-0.94408
CCDC197	-1.62131	0.0308676	0.470656	0.152142	0.669348	-0.0393453	-0.74931	0.511369	3.11079	-0.725851	-0.0472889	-1.24151	-0.959044	-0.711904	1.21411	1.13155	-1.68021	0.312625	0.875117	0.354022	2.08658	-0.0452886	-1.11078	0.351884	0.12551	-0.454396	-1.6945	-0.0589147	0.20095	-2.17308	-0.0892801	1.05394	-0.249836	0.694568	-1.77879	-0.0308681	-0.701863	-0.17281	-0.554316	-1.38039	0.0697398	0.966763	1.61899	1.14917	0.586091	1.12855
SERPINB12	-0.189479	0.0748997	-1.57865	-2.93809	-0.76812	-2.04588	2.03121	-0.960716	1.90634	-0.133479	0.401846	-0.0148497	-0.198107	-1.15588	-0.860494	0.94576	-1.78411	0.0148497	0.917854	1.99717	0.915411	-2.06342	-1.89723	0.615138	1.40666	-0.0664091	-2.04027	-1.35618	-1.353	-1.86359	-0.441407	1.03767	1.42473	-0.116402	1.70636	1.90117	0.574861	1.73289	1.1732	1.37382	1.01049	-2.73819	-0.600587	1.33533	1.47113	0.496344
GIPC3	-1.18293	0.138951	1.48453	0.522524	-0.13956	-0.0110288	0.0110288	0.17628	1.90974	1.05992	1.47113	-0.924412	1.44423	-0.171969	0.261127	0.729602	-0.543405	-0.838781	-0.0839915	-0.566895	1.21584	0.803431	0.346882	0.477105	-1.64482	-0.221021	0.67518	0.596324	-0.553694	0.141998	-1.73094	-1.61461	0.321455	0.694177	-2.2817	-2.13672	-0.921644	-0.652447	-0.772509	0.883569	-2.68794	-0.146957	0.968416	-0.271256	-0.703355	0.424741
PGLYRP3	-0.384572	2.73483	-1.09794	-0.0547023	-0.988764	-1.11286	1.74822	0.875899	1.5288	-1.39867	0.00142527	-1.06871	-0.132321	0.718058	0.695594	2.11289	-0.189151	0.0338006	0.0856538	2.2936	0.302345	-0.191354	1.31233	-0.129765	-1.96155	1.85893	-0.567595	0.435705	-2.07291	-2.47067	-0.00142527	1.68522	-0.70299	-0.487204	0.0916438	-1.31261	3.07339	1.4253	2.71174	1.56864	-0.636688	-0.1058	0.442637	-0.486788	2.67607	-0.0135036
PSKH2	-2.83511	-2.97813	-0.00955367	-1.15541	0.284743	1.04557	-0.293246	-2.70548	0.178618	-1.14289	-0.25964	0.841232	-0.227179	0.541119	0.620221	-1.85086	0.459135	-0.127204	-1.53023	0.431573	0.5266	-2.66532	0.218151	0.283253	0.852422	-0.639796	0.00955367	0.0896814	0.46787	0.145624	0.108197	-1.58895	0.423646	-0.673659	-0.0894215	-1.09399	-0.330245	-1.03033	0.338573	0.292131	-2.83144	0.66045	0.621123	0.69768	-2.59879	-0.0129113
OR6W1P	-0.8561	-0.0880938	0.467072	-0.351067	0.0956082	-0.223192	0.760844	0.22967	0.256554	0.2853	0.201842	-0.455956	0.438049	-0.79288	0.327674	0.230152	1.14908	-1.37871	0.132475	-0.430125	0.0151772	-0.652969	-0.172055	-0.0151768	-0.187492	0.125027	-0.216945	-0.883037	-0.211607	0.477543	0.428752	0.110513	-0.47143	-0.100716	0.050168	-0.0828705	-0.435872	-0.193507	-0.328954	0.0422935	1.17862	-0.0758042	0.243961	0.248541	-0.0496869	0.152402
MOGAT1	-0.0802522	0.873198	-2.47594	0.694249	0.32172	-2.65581	-0.745816	-0.635505	-0.792291	-1.39023	0.900179	-0.836848	-0.599526	1.17382	0.402668	0.850527	1.17964	3.71516	0.555192	3.21246	0.745159	-0.739918	0.768827	1.02216	0.471611	0.467091	0.772402	1.51925	0.136268	-2.91777	-1.26459	-0.281198	-2.05274	-2.24927	-2.31524	-1.79241	-2.98192	-2.75555	-1.60664	-2.3166	-2.20758	-1.21249	0.0802519	0.718667	0.609288	0.983522
GPR78	-0.282075	-1.34214	-1.10416	0.22497	-0.227853	0.427769	0.709238	0.771405	0.0765884	-0.288161	-0.345197	-0.376858	-0.863586	0.181278	0.394381	0.608363	0.101793	0.514705	0.726889	0.40993	-0.00819278	-1.51792	0.705757	0.0616724	0.323479	-0.118601	-0.619035	-1.01985	0.115488	-0.0634711	0.00518966	-0.439773	-0.63141	0.00923991	0.107312	-0.00518966	-0.254487	0.046778	-0.881797	-0.660928	-0.838774	0.0121057	-3.78007	0.341975	0.289559	-0.177098
H1-8	-3.46829	0.711868	0.0762348	-0.618056	-1.70022	-0.979243	0.882734	-0.333466	0.253505	0.0914207	-1.3752	0.205104	0.435053	-0.0567193	1.33983	-1.37274	-0.102277	-1.42863	-0.887163	-0.240694	0.616467	1.00237	-2.48464	0.270932	-0.493505	-0.685478	0.433572	-0.410029	-0.774051	-0.293631	2.13909	-2.89963	0.344644	0.386265	0.0567193	1.26585	-1.22257	-0.984398	0.434919	0.758984	-1.63562	2.22664	0.801622	0.84075	1.51732	-1.65597
TAAR9	-0.0257902	0.584962	-0.221984	-0.328186	0.20559	-3.19082	-2.46636	-3.02794	1.79101	0.0509672	-2.19643	-0.0787644	0.0948672	-1.73583	-1.33355	-0.000827	-1.69424	-1.40399	-3.04033	1.2667	1.13842	0.721179	0.814301	0.910665	-0.414737	-1.79558	-1.74417	-0.0683003	-0.778452	0.436371	1.09977	0.70917	0.489788	0.0941167	0.572554	0.000828	0.686852	0.165372	-1.82308	1.19431	0.915104	-2.08792	0.319168	1.40615	-0.173012	-1.51532
GNRHR2	-1.57815	1.88788	0.821723	-0.40423	-0.608047	-0.126932	-0.0358782	-0.130122	0.133785	0.0720143	-0.0140424	-1.10687	-0.765243	-1.9305	-0.229925	-0.255846	-0.115458	0.329561	-0.145108	-0.115835	-0.843086	-0.410105	0.388269	-0.542051	-0.275743	0.337709	0.460907	-1.28251	0.048902	0.467759	0.0140429	0.863402	-0.478274	0.445062	0.468447	0.311539	0.291401	0.478437	-0.0337162	0.41234	0.229327	0.782744	2.12075	0.652251	1.15118	-0.670374
MYOZ3	1.11711	0.910477	1.18547	-0.0241532	0.944171	1.2654	1.99383	0.905633	-0.837587	-0.640635	0.985211	-0.368951	0.711183	1.4861	2.67115	0.741352	-0.458299	-0.865187	1.02516	0.969511	0.441642	-0.169774	-0.736068	1.8504	-0.298004	0.06921	-1.325	-1.37708	1.21576	0.0241532	-0.776516	1.08372	0.784434	-1.03817	-1.22449	-1.17699	-1.09403	-0.581065	-0.674526	1.11386	-0.187242	-0.499012	-0.325154	-0.152202	1.51297	-0.444502
BNIPL	-1.56291	-0.466591	-0.300215	0.170558	0.351263	1.58666	-0.157382	0.375475	1.46835	-0.108046	0.517459	0.0385022	-0.312715	1.73374	2.2523	-0.465543	-0.392877	-0.0385022	-2.19272	-0.206627	0.0590253	-0.562266	-0.906207	1.98989	-0.621115	-0.978123	1.11671	-1.57373	-0.214915	1.23596	1.87918	-0.830515	1.39816	1.03699	-0.393328	-1.49684	0.864832	-0.899073	2.02486	0.956085	0.319691	0.0883765	0.217345	0.43167	-0.808146	-0.892661
ASB11	-3.36932	1.20943	-1.7247	-1.89091	-0.178915	-0.248286	-1.59422	-1.07363	1.58661	1.22146	-3.19114	2.22349	0.067822	0.350807	1.07509	1.0737	0.898308	-1.64149	-1.5119	-2.38838	-2.74009	-3.29372	-3.32213	-1.21932	1.21615	0.519571	-1.43665	0.593825	0.393623	1.07408	1.11914	0.493002	1.44222	-0.0210171	-0.506326	2.08798	0.169266	-1.35983	1.53632	0.0210171	0.655463	-1.01929	-1.68815	0.969881	-0.236836	-1.35634
OFCC1	-1.30482	-1.31947	2.67435	1.68516	2.80261	1.02117	-0.480171	2.68311	3.64204	2.48118	-1.45744	-1.46753	2.76626	-0.320506	3.23013	-1.46376	1.9209	-0.404853	-0.241226	-0.5298	0.0752602	2.34885	-0.442636	3.22975	0.485574	-0.124511	4.02711	-1.13115	-1.26038	-0.342689	0.674983	2.11174	-1.45258	-0.0752602	-0.22265	2.74223	-0.803698	-0.576725	-1.40218	-1.12689	-1.52004	0.470524	3.79342	0.945466	3.77642	0.937985
SDR9C7	-0.00921202	-1.83657	-0.772877	-0.325676	-0.0108304	1.39992	-1.31019	-0.77141	2.26237	-0.703928	0.540842	0.122547	-0.241599	-0.444347	0.0183372	2.05034	-0.916574	0.663125	-0.695662	-0.0535483	0.538416	1.35918	1.00314	-0.399209	0.581613	-0.674972	0.534622	0.381301	1.04421	0.00921202	0.254918	0.795521	-0.872179	-1.24918	-0.226359	0.778266	2.58674	-0.890607	-0.779641	0.658468	1.22949	-0.805421	-0.1592	-0.221313	0.948294	3.23344
OR5P3	-1.17209	0.671014	0.776417	0.981722	0.465623	-1.27485	1.31882	1.78693	-1.27021	-2.98434	0.491088	-1.25689	-0.981404	0.0562363	-1.15089	-1.49955	-1.36924	-1.02725	-1.56048	1.12603	1.33888	-0.794535	1.51038	1.38697	0.550577	-0.0562367	-0.995799	0.749474	-1.33744	-0.666088	0.894091	-0.333916	1.20477	-1.28723	-1.99026	1.14745	1.13076	-0.899503	1.20248	1.33827	0.843204	1.59196	-1.02469	1.29209	-0.341331	-2.16674
TRIM40	0.685223	-1.23518	0.53281	0.944867	-2.31782	-0.346692	0.452671	0.822106	-1.62774	1.01234	-2.85765	-5.10409	0.529428	1.49551	-0.615315	-0.503018	-0.233524	-0.720165	-0.0290794	-0.107935	0.524037	0.451875	0.211	0.0504532	-2.2587	-0.251946	-0.498395	-1.04983	0.825769	-0.601687	0.89372	0.282793	0.411756	2.29063	-0.0007	2.24893	0.346997	0.568885	-0.974523	-0.153558	1.26991	-0.93629	-3.57918	0.000701	-1.72281	0.0205243
CSN1S2AP	0.212528	1.05338	0.624105	0.593071	0.147694	0.641627	0.897224	-3.2369	0.643039	-0.325534	-3.46063	-1.48123	0.611609	0.759156	0.540875	0.449017	-1.01842	-0.0928926	1.36737	0.748316	0.477097	-0.752968	-2.7961	-0.724475	-0.565253	0.663778	0.571647	-1.53891	1.09623	0.422661	-0.152322	-1.19691	0.580297	-0.148441	-0.523733	-0.814151	-0.0874858	0.781338	-0.551322	-0.202253	-1.29655	0.0648723	0.778188	-0.820286	-0.0648723	-0.273399
WFDC12	-0.588143	-0.0865576	1.04269	0.558305	0.333969	-0.296329	0.207845	0.950354	-2.12993	-0.585864	-0.193929	0.278708	0.786107	0.487263	0.96545	0.498924	0.307157	0.0672095	-1.55033	-0.179765	-0.0672095	-0.18136	-1.20613	1.16701	-0.627507	1.20606	-0.445224	0.279969	0.333944	0.845972	-0.483754	0.764237	0.760956	-1.53688	-2.89371	-0.568548	-1.31825	1.00364	-2.62444	-2.44948	0.664857	-1.00627	0.989571	0.0996218	-0.776011	-2.78008
CRYGN	-1.38791	1.2479	1.7873	-0.115411	1.78087	-0.179418	0.317442	1.90379	0.114438	2.23967	1.15921	-0.507865	-0.974042	0.317899	0.39535	-0.376902	-0.410367	-0.154286	2.19588	1.99374	1.75999	-0.0514479	1.74485	0.438407	0.0409565	2.06924	-0.924129	-0.999087	2.50804	-1.56525	-1.36266	-2.30268	-0.830604	-1.21701	2.48959	-2.00536	-0.193624	-3.00705	-1.14557	0.84329	0.958236	-0.040956	1.86827	2.32085	-0.261427	-0.449103
STARD6	-2.62788	0.580471	-2.44678	0.790026	-1.3692	-4.59442	0.808651	-2.78287	0.92898	0.346121	-1.43765	0.151285	1.32043	-0.375471	0.0738769	0.587568	-2.66457	0.130326	-2.03435	-2.52294	-0.781267	-0.0738764	-2.4273	0.65693	0.93116	-0.273458	-3.78352	-1.15161	1.59508	-2.04792	-1.57953	0.282199	0.629977	0.43267	0.453698	0.92002	0.865238	-1.94849	0.558924	-2.43957	-0.59769	0.170662	0.746636	-1.64898	0.52858	-1.068
C11orf40	2.2925	0.307175	-1.33851	1.88704	2.16955	-0.467245	-0.961767	0.59696	-0.35222	-0.650976	-1.43413	1.93562	-0.184083	-0.165359	0.0624342	-0.516518	0.693689	-0.883208	-0.921446	0.100752	-1.33741	-0.874383	-0.183976	-0.152578	-1.7121	0.653367	3.28039	1.30715	-1.23196	2.22341	-1.63591	-0.268563	1.74644	-0.848131	0.767941	1.92789	-1.78085	3.0342	1.55894	0.389623	-0.561925	0.633065	0.263196	3.08248	-0.0624342	1.01706
C18orf12	0.485503	0.220324	1.34117	0.0456123	1.1537	-1.45167	1.79359	1.16831	0.0516057	1.15801	0.609827	-0.967074	-0.663326	-0.169542	1.53189	1.67437	-1.62445	1.05505	-1.67146	1.41635	1.12715	-1.28051	-0.437273	-0.317174	2.24413	0.184764	-0.0553837	-1.35529	0.0639362	-0.971433	1.02098	-2.34987	-0.883346	1.42378	-0.251971	-1.68229	-1.173	-0.424775	-1.39584	-0.566624	-0.924435	0.596008	2.26483	0.930991	-0.0456119	-0.913638
WFDC2	-2.9453	-1.20064	2.28595	-2.18651	-1.50834	-2.18542	0.228038	0.0129261	0.283633	-2.57928	-0.522072	-2.43844	2.09785	-2.45246	-0.222939	0.00385857	-0.737945	-0.411602	-2.55247	-0.00385857	0.69842	1.26838	1.02175	-1.64473	-1.25415	-1.88866	1.76148	0.713812	-2.39112	1.75466	2.16465	-1.82414	-0.657904	0.404226	2.34037	1.5545	1.08144	1.39124	0.202465	2.30192	-2.06893	-1.22463	-0.539643	1.6805	0.127043	5.21498
DEFB119	2.77506	1.72065	0.379368	-1.12125	-0.962331	0.898971	0.688893	-0.650132	1.77985	0.243376	-0.957757	0.298358	-0.771248	0.15685	1.13937	0.273631	-0.397521	-0.843846	-1.41942	3.38489	-0.43364	-1.58635	2.61251	-0.689781	-0.610886	-1.19506	-1.79316	-1.87258	-1.221	2.16576	-0.540984	-0.292092	2.77363	-1.63658	-0.952625	-1.15202	-1.2459	2.69111	1.9725	0.000915	1.82351	0.215046	0.860142	0.301714	-0.000914	0.294234
TIGD1	-0.305189	0.711967	0.681535	-0.247456	0.286058	-0.839194	0.380991	-0.955053	-0.00550175	0.330592	0.122529	-0.0763192	0.248801	0.795189	1.33836	0.0481887	-0.349332	-0.612913	-0.0242195	0.00550175	1.08701	-0.524942	-0.796459	0.673581	-0.0668149	0.496118	-0.739449	-0.12881	-0.420557	-0.373412	-0.578845	-0.635969	-0.520095	-0.538891	0.336681	-0.456073	0.497054	0.352222	0.498226	0.614128	-0.459603	1.01352	-0.601387	1.35232	0.333959	1.52973
CCDC69	0.172239	-0.659405	-0.00701428	1.15953	0.617475	0.199102	-0.316458	0.326412	0.677044	-1.17302	-0.654579	-0.0200253	1.17779	0.0258741	-1.21806	0.579683	-1.0625	0.388691	0.011879	0.00701428	1.14727	0.712383	0.252543	-0.844973	-0.246418	0.667534	1.20345	-0.69094	-0.505437	-0.904099	0.532561	-0.323879	0.0744944	0.65839	0.163135	0.31674	-0.953107	-0.265027	-1.58499	-0.44925	1.1008	-1.86709	-1.53464	-0.731227	-0.325935	-2.1569
NFX1	-0.373895	0.641116	0.765693	0.227891	-0.491039	0.0525517	0.238571	0.00347853	0.396628	0.583077	0.173509	-0.175035	0.293755	0.848333	-0.134801	-0.135212	0.655341	-0.437129	-0.275668	-0.352338	-0.0382094	-0.616215	0.0522838	-0.342756	-0.228714	0.0796371	0.133515	-0.0326266	-0.147533	-0.122712	-0.269646	0.0905309	0.519252	-0.25152	-0.00347853	-0.386778	0.504986	-0.121163	0.401609	-0.0972257	-1.13349	-0.471213	0.43107	0.89938	0.53232	1.61668
DSG2	0.453328	-0.76623	-0.0491576	0.0715957	-1.21538	0.532008	-0.202333	0.0536351	0.0620017	0.696459	0.335099	0.486211	0.239769	0.185789	-0.525935	-0.347315	0.506198	-0.368802	0.00969267	-0.865631	-1.37714	-0.869979	-0.438805	0.488738	-0.53097	-0.29348	-0.00969267	-0.891407	0.424307	-0.690583	0.685273	0.524564	0.259747	0.299783	0.264353	0.762156	0.464922	-0.60221	-0.52211	0.740924	0.069881	-0.466942	-0.506173	-0.181749	-0.535039	-0.0913906
C5orf24	0.395126	-0.0941081	-0.265929	0.445974	-0.165338	0.482145	1.04309	0.451998	0.416666	0.665332	0.14597	0.196004	0.28726	-0.601982	0.56644	-0.0201344	0.0854144	-0.038291	-0.122488	0.367858	-0.62585	0.313162	0.0201344	1.28319	0.335271	-0.535695	0.370574	0.449108	-0.0992718	0.217921	-0.352295	-0.128494	-0.141161	-0.350824	-0.0260777	-0.137359	-0.0514197	-0.148293	0.593066	-0.246079	-0.385366	-0.185777	0.175591	0.0493331	-0.844375	-0.349728
PTK6	-0.0596147	-0.0378203	0.047008	0.591166	-0.731412	-0.160689	0.792057	1.17924	0.334961	-0.430759	0.0663619	-2.1614	0.226744	0.1083	1.10817	-0.44963	-0.0614133	0.319891	-0.466867	-0.299645	-0.55302	-0.0159869	-0.577715	0.574283	0.528284	-0.843953	-0.526008	-0.328155	1.22766	0.662439	0.565254	0.353488	-0.0380731	0.77564	0.532996	0.44275	-0.085566	0.450534	0.0159869	0.484404	0.505956	-0.169208	-1.04844	-0.143335	-0.240179	-0.352079
CLSPN	0.616344	-0.3368	-0.325958	0.0491307	-0.988012	0.638187	0.574939	0.264299	0.878489	0.876191	0.247405	0.495927	-0.847131	-0.0540011	0.856619	0.360256	0.292979	-0.321306	-0.139322	-0.144307	-0.082834	-0.79076	0.380397	-0.491705	-2.83998	-1.17981	-1.2789	-0.45369	-0.733306	0.975329	0.117141	-0.02755	-0.29356	0.0890873	0.548122	0.02755	1.32667	1.06308	1.04004	-0.19695	-0.13996	0.0314391	-0.605505	-0.966971	0.760677	-0.66289
WDR62	-0.835592	0.664393	-0.230277	-1.98343	-0.261455	0.277213	0.158565	-1.02668	1.03014	0.294537	0.0392077	-0.147891	0.15026	-0.678516	-0.320849	0.569858	0.271901	-0.0505435	0.0485547	0.409549	-1.85046	-0.554961	-0.609791	1.30997	0.142054	-0.0286376	-0.71607	0.541318	0.891773	-0.523446	-0.292709	-0.307022	0.145826	-0.445561	-0.653567	-0.0487149	-0.236087	0.0578139	-0.232323	-0.829482	0.48477	0.0286376	0.963775	0.583037	0.671231	0.451385
SLC39A12	-1.54633	1.80523	-0.986303	-1.69065	0.00999641	-3.94643	-3.80096	0.581568	-1.86828	0.104082	-2.33679	0.16129	-1.67297	0.172539	-3.53942	0.121923	-2.31595	0.5043	0.26948	-3.10334	1.19565	-1.89366	0.124727	-0.440838	0.565607	0.568963	1.24352	-1.06447	1.02677	1.18362	0.961443	-2.26754	0.137925	-0.33529	-3.76434	-1.74244	0.278006	-1.02427	-3.30578	0.4867	-0.00999641	-2.16995	0.0806356	0.955146	1.73585	-1.55869
LOC652276	0.408557	-1.5544	-1.66034	-1.96119	0.291444	0.549326	-0.826778	-1.01477	0.477418	-2.03297	-1.88651	0.25775	0.893045	0.472701	-1.11898	-1.77001	-2.33951	0.583166	-0.44486	-0.880651	-0.643109	0.24056	-2.66533	0.234148	0.41653	0.0467038	0.205296	-2.39363	0.557025	-0.296509	0.243375	-1.68855	0.654607	-2.06963	0.320953	0.952925	0.00498533	0.388643	-1.63931	-1.29135	1.38914	0.36792	-0.00498533	1.72952	-0.819579	-1.1189
ANKLE1	-0.262905	1.49013	2.25377	-1.36056	0.365928	-1.40364	-0.625548	-0.246365	-0.315447	1.29668	0.70811	-0.975725	1.41274	-0.640029	-0.153732	1.83098	-0.931537	2.35055	-0.412755	-1.48705	1.44184	0.741893	1.52227	-0.905824	1.22453	0.674136	1.64902	2.43994	1.70431	-1.54463	-0.799677	-0.459211	-0.689669	0.894389	-1.10747	0.304245	1.44137	1.88758	-0.249171	-1.27934	-1.57826	0.668856	-0.90261	0.153731	2.31935	-0.686307
TAPT1-AS1	-0.223024	-0.204825	-0.265893	0.719544	0.697743	-0.340023	-0.0886533	0.236553	0.314059	-0.126395	0.454703	0.0256698	0.787007	0.188133	-0.0634024	0.124182	-0.32201	0.352965	0.137169	-0.167234	0.428596	-0.0302432	0.482254	0.00967145	0.0306413	-0.303935	0.278361	-0.0921609	-0.0625899	-1.4482	-0.216949	-0.00967145	0.160677	-0.0214384	-0.147567	0.227557	-0.131116	-0.230602	-0.409404	0.361105	-0.359688	0.0336154	-0.0701458	0.5315	0.240398	0.861234
TEX55	2.0986	2.37463	0.436629	1.8899	-0.480379	-1.28027	-0.429616	-0.257497	2.2923	1.3884	-0.438039	-0.598527	0.672634	-2.18409	-1.42736	1.57764	0.849532	-0.282143	-1.43562	1.34763	-0.166717	0.755831	-1.44643	0.239305	-1.09996	0.966954	0.975314	-0.56704	-0.458591	1.13631	1.48288	0.910426	-0.742075	0.789929	-0.203409	-1.41239	-0.943271	1.8058	-0.99647	2.08698	0.166717	-1.48902	-0.654852	1.44388	1.31656	-0.319186
RANBP3L	-0.380167	2.23066	-0.492292	-1.73089	0.0238886	-2.7746	-2.65949	-1.13633	3.25916	-1.74082	0.0593128	-1.73757	-1.84952	1.98437	2.65744	2.0333	-0.723364	1.69872	-2.8062	-0.856453	2.36035	1.51788	-1.11073	0.315277	1.45327	-0.0599184	-0.880385	1.85624	-0.624544	-0.0238886	-0.51415	0.516886	1.85496	0.722626	-0.864041	0.61507	-1.8488	-1.03702	-1.32497	0.624297	-0.920421	2.05606	0.904176	0.51254	0.23666	1.01247
KDM1B	0.0141563	1.08517	-0.505104	-0.9909	-0.404012	0.156281	1.22269	-0.648263	-0.832758	-0.482791	-0.438836	-1.85273	-1.59307	-0.980187	-0.812752	-0.356785	0.0711451	-0.80237	-0.910953	-0.487817	-0.963723	-0.243607	0.231977	-0.481953	-0.260001	-0.0160475	-0.67731	0.629754	0.185497	1.97616	1.5314	2.1193	2.12539	1.14615	1.4591	1.43444	0.645847	1.81197	3.18286	1.16532	2.3759	0.636016	-1.16994	0.0784183	-0.0141563	0.0203314
ATP6V0D2	0.82115	-0.00748777	0.936002	0.192996	0.740972	-0.121907	-0.00530386	-0.388187	1.00899	-1.29212	-2.23843	-0.593565	0.784468	1.42287	-1.13117	0.273735	-0.50347	0.0141835	-0.275963	-0.924113	0.263236	1.19585	-0.15893	-0.0731378	-0.394058	0.7557	1.79565	0.76835	-0.389518	0.808057	1.14531	-0.124465	0.501077	1.5307	-0.576493	1.31394	-1.34228	-0.521152	0.00530386	0.649658	0.945549	-1.79994	-1.30433	1.1158	-0.302448	-0.440734
LHX4	0.854478	-0.412531	1.61461	1.1498	-0.59461	-0.967037	-0.719656	-0.792087	1.23895	-0.728765	-0.447004	0.75664	0.98255	1.01023	3.85941	-0.971024	0.230077	0.367042	0.966709	1.56421	1.03643	-1.19735	-0.519457	0.390045	-0.0800061	-0.0954351	-0.700778	1.78094	-0.702809	0.176511	0.00291491	-0.00291443	0.338753	-0.415535	-0.604561	-0.0987587	-1.15533	-0.801143	0.108044	1.1514	-0.518987	0.541907	-0.47015	0.882192	2.89273	-0.138343
CEP19	-0.0152826	0.407431	-0.305706	-0.104436	0.772244	-0.596561	0.0739489	-0.34101	1.24608	-0.869343	-0.252089	0.486515	0.837885	0.301136	0.308929	0.36674	-0.558636	0.0896025	0.33616	0.447056	0.940545	-0.229219	0.141274	-0.22872	0.220987	0.304128	0.247683	-0.199545	0.177717	0.0477819	-0.644164	0.476866	0.0152826	0.370329	-0.169645	-0.161507	-0.328156	0.247283	-0.0422192	-1.2881	-0.153483	-0.520144	-0.58751	-2.45456	-0.40226	-0.0401678
PROSER3	-0.38671	0.490379	-0.506648	0.0523367	0.15221	-0.241394	0.362182	0.276566	-0.0348711	-0.0325232	-0.447762	-0.391676	-0.232381	-0.058238	0.175759	0.598299	0.293447	0.0829811	0.161936	0.041131	-0.395938	-0.278314	0.375213	0.559875	0.207031	-0.125136	0.0043478	-0.244032	0.162188	-0.0043478	-0.265326	-0.180719	0.0839787	-0.6417	0.153236	-0.169477	0.116345	0.184422	-0.167027	0.59842	-0.0965653	0.115256	0.174752	-0.119062	-0.212458	-0.259458
ADPRHL1	-0.486554	-0.284976	0.106715	0.522033	0.562262	-0.00982881	0.613651	-0.356782	0.767802	-0.0506089	-0.998529	-1.01178	-0.203197	-0.53454	0.712812	-0.161292	0.328253	-0.885896	-2.64709	-0.611116	-0.577484	-1.37327	-0.154788	0.314124	0.688882	-0.52716	0.100451	-0.918217	0.233948	0.641417	-0.0175359	0.00982881	-0.457701	0.127768	0.324091	0.569261	0.172783	0.488867	0.104439	1.34416	0.334805	0.288532	-1.42371	-0.213297	-1.77182	0.0619948
GRIK5	-0.98551	1.03104	-0.820291	0.00474501	-0.000979	-0.737776	0.790553	0.368979	0.881417	-1.17799	-0.671841	-1.08015	1.90269	-1.38016	0.165288	-0.467987	0.234411	0.000979	0.109076	-0.719145	1.40023	-0.797676	-0.541948	-0.197758	0.210599	0.469471	1.56116	-0.337676	0.0144305	-1.10392	-1.07864	-1.37739	-0.393015	-0.182695	0.828376	-1.04052	-0.695056	-1.01442	2.04094	2.65772	-0.543876	0.906449	1.20063	2.02921	0.0529304	2.08004
LRRN4	-1.11372	-0.119569	0.374161	-0.502305	2.53566	-1.34539	2.8934	2.49917	2.56744	0.010601	-0.119861	-0.100804	2.18594	-0.465557	1.01309	-1.45631	-0.83898	-0.0655446	-0.638422	-1.10311	0.519683	1.52438	-0.304262	0.352163	-0.421982	0.374372	-0.296233	0.246959	-0.666938	0.294062	0.174116	-0.291693	1.43118	0.808309	0.315005	1.32784	-0.777037	-1.49393	-0.363607	2.10638	1.18738	-0.010601	-0.248908	0.0459633	1.87932	-0.637989
JPH2	-1.21011	1.93953	-0.541279	0.836127	0.163643	-0.566233	0.95022	-0.106527	1.1046	0.954592	0.27868	1.14307	0.87043	-0.418789	1.49086	-0.0632272	0.590104	-0.136837	0.357351	0.467206	1.01248	-0.0214362	0.572389	0.693394	0.538725	-0.592045	-0.480789	-0.0222411	0.0795698	-1.3456	0.0214362	-0.910745	-1.16113	-0.388418	-0.388214	-0.0360875	-0.66581	-0.655676	-0.92108	-0.297067	-0.31609	0.963857	1.94314	2.96643	0.54567	-1.04367
SH2D1B	0.707399	0.62168	1.48802	1.2748	-1.8695	-1.52092	0.825524	0.890232	1.61463	-0.732873	-0.760042	-1.08004	0.293119	1.3467	-1.10454	-0.615001	0.0584056	-0.26377	0.0472338	-0.471857	-0.421468	1.00175	-0.0472338	-0.0771277	-2.85325	0.762783	1.00731	-3.98893	-0.350415	0.336804	0.614696	-0.246367	-2.43441	1.46963	-0.81419	0.928612	0.366808	0.142006	0.469613	-0.321267	0.606383	-1.32454	-0.51447	-0.658932	-0.161065	0.996118
ADAMTS19	-0.37058	-0.585146	1.14373	2.51849	-0.447017	0.391563	0.278686	-1.54331	-0.584456	1.01447	1.27604	2.80543	1.2716	-1.52481	-1.18416	-0.865036	1.89653	-1.32339	1.99215	0.662923	0.616662	-1.33841	1.27546	-1.74734	-1.07755	-0.380236	1.12285	-0.919971	-1.67475	-0.280665	-0.0880861	-1.69528	0.991322	0.0550079	-0.960515	-1.4995	-1.02119	-0.0550079	1.77825	2.90725	1.54555	1.61234	3.41774	-0.115149	0.309702	0.885708
DDX31	-0.335601	0.184697	0.107861	-0.150896	-0.758145	-0.7631	0.596483	0.561486	0.926342	-0.326969	-0.14662	-0.906994	-0.135663	0.419296	0.347781	0.550069	0.142195	-0.0220463	0.170611	-0.828222	0.0218556	-0.30086	-0.452687	0.275892	-0.157954	0.191502	0.240175	-0.382945	0.529808	-0.304801	1.3299	0.119037	-0.0821245	0.590665	-0.0218556	0.452194	-0.557896	-0.440913	-0.415984	0.494704	0.28787	-0.100953	0.348838	-0.500784	0.326193	-0.102624
UMODL1	0.7907	-0.620979	-1.43475	-1.82627	-1.09048	-0.0715694	2.20482	-1.44214	0.28291	-1.01503	3.27221	-0.434659	-0.866109	0.0301948	3.92717	0.260391	-0.440246	0.0637875	-0.701988	1.83441	1.4351	2.16515	-1.71711	-0.525338	-0.315412	0.199006	-0.822041	2.45667	-0.01548	2.78197	3.55143	-1.25755	3.79559	-0.0680771	2.93546	-1.34739	-1.24584	2.85541	2.237	-1.11129	-0.67537	5.8826	-0.293081	0.0154796	0.0637193	2.45068
RASEF	-0.142622	0.438319	1.00753	0.311662	-0.632225	-1.00588	-1.03386	-1.04579	1.32938	0.458688	-0.756988	-0.15736	0.649082	0.903558	0.840807	-0.0673099	-1.55385	-0.624887	-0.64363	0.507096	0.214866	0.586128	0.444714	-0.244187	0.247098	-0.0162692	-0.222627	-0.320803	0.0883698	0.24952	0.0162692	-0.589967	-0.770881	0.152218	0.493504	-0.0871654	0.996142	0.311724	-0.609657	0.550885	-0.375574	0.9431	-0.46574	-0.236689	-0.459753	0.119422
PARD3B	-0.894733	-1.07961	1.23681	-1.48951	2.76278	0.75579	0.525226	-0.391696	0.667913	0.149956	-0.668388	-1.21006	-0.552891	-0.851955	1.64289	-1.35422	-0.888723	-0.835368	-0.592578	0.896868	-0.223034	0.529171	1.54311	-0.379641	-1.37525	0.784623	-1.49063	-0.281088	0.446061	1.40855	0.873214	2.35457	-1.10291	0.479082	-0.482206	0.778571	-1.72394	0.220091	0.324381	-0.339704	0.587682	1.95828	2.69888	0.131325	-0.131324	-0.424357
ZNF441	-0.0302198	-1.31839	-0.404335	-0.698845	-0.84214	0.448611	-0.178658	-2.35208	-0.00601649	-0.241129	-0.169685	-0.181436	-0.340366	-0.280385	0.189858	0.427355	-2.23065	-1.27037	0.30696	-0.107082	0.309512	-1.00135	-0.109461	1.42136	-0.685929	0.12621	0.0406082	0.343939	-0.0225093	-0.112777	0.200258	0.679649	0.00601649	0.569669	0.957803	0.655174	0.886128	0.779579	0.889608	0.358598	0.428839	0.0653861	-0.0147324	-0.9095	0.312398	0.350818
DCAF4L2	-0.0455771	-0.177495	3.65611	0.45857	-0.352781	0.0584273	0.0395579	-0.0513749	2.10646	2.76104	-0.424501	-0.0317292	0.576726	1.05238	3.73435	-0.505087	-0.985354	-0.941905	2.27168	-0.730022	-0.182498	-0.737775	-0.0691581	1.97696	-0.393852	-0.762606	-1.16756	0.870197	2.70441	1.70957	-0.416866	2.34419	-1.91795	2.77151	0.645922	-1.59235	2.41015	-1.28767	1.9352	-1.5891	0.187313	0.0317292	0.170311	2.09505	-0.41622	-0.121072
STOX1	1.3699	1.75208	0.342728	-1.62659	-0.413902	0.303883	1.21204	-2.69884	-0.00313163	-0.705982	0.222693	0.23964	-0.629688	-0.5427	1.36611	-3.84733	-1.15469	-0.815311	-0.262367	-0.932559	0.409996	-0.418453	0.252229	0.840986	0.431272	1.45561	-3.77628	0.16371	0.814536	0.00313163	-0.194849	-0.408235	1.23264	-1.56551	1.16559	0.321922	-5.19749	0.662944	0.441495	-0.349357	0.575536	-0.216618	-3.46095	-0.196395	0.528724	-0.311541
MIR1-1HG-AS1	-0.00730991	-0.918932	0.588942	0.376236	0.221153	0.00730991	-0.358262	-0.866327	0.961127	-0.247556	-0.593026	0.480772	-0.176929	0.174624	0.593082	0.31183	-0.357448	-0.08325	0.481578	-0.269746	0.244004	0.352331	0.730541	0.170647	0.503122	0.336576	-0.0312672	0.23086	-0.677048	-0.458758	-0.438656	-0.28026	-0.251101	-0.133411	0.372288	-0.650676	-0.418853	-1.20442	-0.0955114	0.0952721	-0.13805	0.177021	0.384379	0.09551	0.730205	-0.048985
ANKFN1	1.12591	-0.890906	-1.03635	-1.56663	-1.13091	0.137153	1.65967	-1.85563	3.0269	0.768518	-1.39189	-2.25487	-0.766075	1.88366	-0.109764	1.79738	2.84619	1.74046	0.879433	-1.46113	2.45897	-1.72558	-1.57019	-1.03647	2.61827	-2.9509	0.0491128	-1.02718	2.22574	2.07541	-2.19625	2.18628	-1.39507	-1.97062	2.24836	-0.352837	-0.290523	-1.67934	-1.21989	0.46283	1.02371	2.33457	-0.0491128	2.37993	0.930728	1.2764
KRT78	-0.771338	-0.804269	-0.348888	1.05567	-0.857623	0.491601	-0.348303	0.454035	4.07149	-0.905869	-0.978947	0.293583	-0.712425	-1.01028	0.862829	-0.966987	0.161761	-0.584091	0.879405	0.620987	-0.603878	-0.665489	0.606537	-1.09423	2.17398	0.242007	0.0273542	0.362978	-0.141409	-0.697378	2.40798	-1.4078	-0.356321	-0.311288	4.03075	-0.206981	1.68686	0.654234	-0.209562	-0.0273542	2.74765	0.325781	0.130876	0.220787	-0.0989094	0.864762
CCDC7	0.303505	-1.63438	2.53452	-0.514168	2.21206	-1.94726	-0.362383	-1.90351	-1.41407	-0.10868	-1.95493	-1.96502	2.75793	2.04574	2.39971	1.19116	2.72317	0.560371	1.66851	2.52614	-1.50303	-2.07536	0.46407	-0.443586	-0.873772	-0.924982	1.88183	-2.01251	-1.95293	-1.51302	-1.54681	0.527384	0.58317	2.13863	-2.00653	2.3291	-0.484861	-1.84444	1.60866	-1.97886	1.60959	-0.637417	0.10868	0.447968	0.145339	2.5325
ZNF41	-0.803504	-0.505953	-0.206086	0.0480549	-0.652928	0.175386	0.127177	-0.236658	-1.15896	-0.109749	0.329097	-0.428255	-0.0685403	-0.272078	0.0498407	0.0613792	-0.714393	0.250063	0.211591	0.158131	-0.931843	-0.225116	-0.0829275	0.23943	0.0594747	-0.119062	-0.573333	0.187858	-0.0480549	0.399448	1.02145	0.212029	0.141188	0.364515	0.48674	-0.307172	0.152382	0.708746	-0.377443	0.458144	0.494563	0.450662	-0.418887	-0.20351	-0.346713	-0.0830138
ZNF583	-1.07773	-0.805375	-0.451005	-0.214646	0.104212	0.232769	0.705146	-0.616582	0.261215	0.531008	0.287791	0.226845	0.226341	-0.233207	0.543784	-1.06889	0.110501	-0.124313	0.458716	-0.0474637	0.112975	-0.0358493	0.314773	-0.794225	-0.0250318	-0.348189	0.596558	-0.00586963	-0.43133	0.127342	-0.296842	-0.0008	-0.205886	0.0008	0.902042	0.193127	0.953503	0.206591	-0.203609	0.04933	-0.438008	-0.918085	-0.368182	0.695817	0.403343	-0.719677
OXER1	0.398265	-0.467175	-0.234726	-0.569352	-0.170931	0.000741	0.842434	0.450233	-0.0513711	-0.50623	0.134767	0.0175118	-0.453445	0.439273	0.391147	0.721788	0.129117	-0.455079	-0.160536	0.00683832	0.0865283	0.399107	0.00128794	0.839349	-0.157672	-0.0947595	0.354261	0.32178	-0.0852485	-0.0628142	0.37673	-0.687358	-0.000741	-0.268391	-0.285093	0.36038	-0.0617557	-0.473919	-0.793652	0.126816	0.108811	0.465349	0.10851	-0.72057	-0.120546	-0.672999
ZNF75D	-0.56294	0.0154865	-0.0940602	-0.195892	-0.0995023	-0.606573	-0.155351	-0.0671504	-0.609026	-1.03469	0.755292	-0.118019	0.0831168	-0.200358	0.593055	-0.515614	-0.260124	0.0532391	-0.282372	-0.0250828	-0.634239	-0.633424	0.309859	0.354234	-0.0154865	-0.309072	-0.218624	0.566863	0.400246	0.830365	0.160096	0.448176	0.801659	0.159937	0.781577	0.435707	0.186745	0.871885	-0.339493	0.241093	0.206756	-0.304533	0.361958	-0.0970366	0.491504	0.655911
LINC00052	0.339368	-1.5288	2.36965	-0.641749	-0.719207	1.77241	-0.825722	-1.65391	1.99985	-1.26996	-0.911583	1.69401	0.0181875	-1.00896	-0.967462	1.66224	-2.41012	-0.778896	1.83219	2.29753	2.63833	-0.942792	-0.620434	-0.36572	2.54905	1.26369	-1.27229	-0.333124	1.59845	1.11798	2.86979	-0.0181875	-2.54	2.2609	-0.637412	-1.03359	-0.3072	2.22808	-0.68225	0.646528	1.32781	2.46016	-1.09895	0.95454	1.90951	1.61502
CCDC89	-0.417073	-0.195505	-1.54291	1.05037	-0.821412	0.0856051	0.319051	0.5601	0.517839	-0.67419	-0.650784	-0.780131	0.312982	-0.817085	-0.197889	0.521596	-0.456055	1.12056	-0.185553	0.692829	0.782434	-1.89169	-4.66106	0.937912	-0.111735	-2.53094	0.462806	0.654381	-0.619348	-0.433195	0.944903	0.394985	-0.0435743	-3.09608	0.332068	-0.659029	1.49877	-0.63527	-0.734482	-3.36543	0.626589	0.678363	0.0435743	1.2091	1.0559	0.537059
ZNF572	0.29478	1.05199	-0.0914061	-0.979222	-0.506751	-0.763889	-0.537545	0.00853467	-1.32016	-0.0105073	0.270076	0.105267	-0.253266	0.0506313	0.139309	-0.763233	0.109035	-1.24472	-0.469969	-0.00853467	0.528462	-3.43263	-0.164188	-0.871704	0.251005	-0.12728	-0.848782	0.113822	-0.604449	0.343209	-0.664904	-0.35777	-0.0258138	0.108104	0.662743	-0.521191	0.120725	0.122811	-0.212511	0.466325	0.0185034	0.470941	0.130999	0.363561	0.168951	0.134447
PCDHAC1	2.14772	0.394059	-0.834381	2.29498	-1.4332	0.157744	-0.761236	-0.205709	-0.689373	0.0623994	0.424098	2.98369	2.24465	-0.643146	1.05195	-0.171177	-0.864362	0.713311	1.19096	-0.396937	2.99667	-0.539341	-0.0623994	0.552801	0.858733	3.34382	-0.8028	1.49752	-0.511543	-0.11039	0.343705	1.03329	-1.00093	-0.753214	0.59254	-0.392264	-0.369091	0.47137	-1.25665	-0.802855	-0.138807	-0.415809	0.927949	0.546642	2.08303	-0.244102
HIPK4	-2.51304	0.152657	-1.2108	0.299809	0.156865	0.2602	-0.258299	0.364378	0.0750415	-0.955331	-0.0532987	-0.891253	0.29034	-2.2122	0.970061	-0.116572	0.541425	-0.00565314	-0.0791762	0.594172	0.174924	-2.30818	0.28373	-0.452093	0.68051	-0.303032	-1.55138	-0.77147	0.00697541	0.492451	-2.05993	-0.576714	-0.165718	-2.40176	-0.00389457	0.732847	0.679624	-2.37065	0.460071	-0.136823	0.676079	-0.149538	0.616345	0.477288	1.58375	0.00389457
NKAIN3	0.0773113	-1.03305	0.274628	-1.53498	0.180153	-2.44065	-0.475268	-0.549594	-0.0152481	-2.71346	0.0886052	0.0823629	0.136088	-0.338505	-3.34152	-1.18363	0.430151	-1.81863	0.0731924	0.656895	-0.350398	-2.02635	-0.160562	-0.730621	0.906692	0.185829	-2.09484	0.100056	0.642845	-0.549372	-1.40365	1.13369	-0.363685	-0.355211	0.471051	0.0152481	-1.7261	-1.75061	-0.0877192	0.94981	1.12902	0.276944	0.788314	1.7815	0.856491	1.14823
ITIH5	0.0588441	-0.795578	-0.702134	1.24577	0.853835	0.536003	-0.678801	-0.564905	0.115993	-0.0644097	0.565272	-0.192543	1.30702	-1.29461	-0.0970783	-0.103859	-0.652884	-0.407146	1.09294	0.259101	0.291706	0.272657	-0.228458	-0.522364	0.610219	0.638377	0.611945	1.26358	-0.00652647	0.11938	0.327015	-1.35002	-0.623262	0.027833	-0.553739	0.333785	0.00652647	0.190654	-0.497681	-1.56652	-0.840618	-0.00769901	0.760246	-0.217244	0.589074	-0.168803
POMK	-0.816889	0.0622277	-4.48965	0.348515	-2.46944	-0.254172	-1.35116	-3.20797	0.20601	-0.772908	-0.139676	-0.442188	0.604474	-0.305101	-0.0125151	0.107558	0.0521321	-2.31373	-0.360516	0.56727	0.615545	0.319587	-0.070787	0.414237	0.54029	-2.52892	-1.4409	-0.278866	-0.567347	0.171114	0.270776	0.0125151	-0.332215	0.102378	-0.76084	0.769608	0.435999	0.0812626	1.02147	0.467245	0.259429	0.127299	-0.0313354	0.432686	-1.28782	-0.375587
SMC1B	-1.67323	0.540363	1.10574	1.18561	-1.86165	0.0319424	1.40426	0.112753	-0.0213971	-0.592267	0.893822	-2.34554	-1.6246	-1.33123	1.8607	0.453115	0.558701	-0.608423	-0.617618	-2.7054	-1.74003	-0.88028	-1.81805	0.54982	-2.28573	-2.82671	1.22081	-2.26505	2.01689	-0.825435	2.02401	1.61918	-3.2347	1.22318	1.62137	1.80665	1.18476	-0.611239	0.0213971	-1.46992	0.732628	-2.68563	1.26313	-1.57317	0.683753	-0.809569
BRWD3	0.387853	0.0065558	-0.632097	-0.0277383	0.243955	-0.15758	-0.00714755	0.349281	0.63157	0.392154	0.5538	0.248843	0.0764124	-0.0065558	0.737633	0.348907	-0.192992	-0.669918	-0.997342	0.553864	-0.397459	0.107309	0.284509	0.287494	0.343193	0.349597	-0.121026	0.396821	0.414412	-0.305383	-0.475278	-0.17327	-0.139258	-0.317434	-0.330205	0.291137	-0.723405	0.300012	-0.358969	-0.796895	-0.519573	-0.360242	0.0637987	-0.292769	0.159061	-0.332248
ASB16	-0.167229	0.496752	1.39658	1.13342	-0.0562835	-0.757098	-0.293577	-0.0361743	-0.124969	2.37674	1.78704	2.1355	0.0361743	-0.307994	1.28585	-1.08808	-1.25764	0.89062	1.32105	2.61558	0.144918	0.448061	2.00167	-0.209863	1.11943	-0.799167	-1.36914	-0.0981164	-0.435245	-0.0733643	-0.31018	-0.567697	0.818491	-1.08101	-0.234588	-0.572091	-0.0985846	1.73463	-0.223583	1.46312	-0.852739	1.41145	0.811716	0.714651	0.0688999	1.61417
MAGEE2	0.556298	1.33045	1.4421	-0.249832	-2.21567	-1.57052	-0.537423	0.13534	0.709364	0.331139	-2.41391	-0.743706	1.00526	0.320374	-2.374	-2.81592	1.25748	-0.747753	-0.795087	1.40076	-1.41526	0.424154	0.493042	0.0068059	-0.726006	-1.28674	-0.819221	0.587978	1.16247	0.795632	-0.00444698	-0.364109	-0.142404	-2.35833	-3.45152	0.561262	-1.44428	-0.235922	0.499226	0.52283	-1.45541	2.10222	0.853746	-1.85067	0.00444698	0.917841
ERVV-1	-0.69883	0.0210838	0.703392	-0.614532	0.908819	-2.69395	0.668875	-0.0210834	-2.57493	0.900399	1.14735	-0.428653	0.453753	-0.0805292	1.74501	-0.40531	-1.27705	1.95775	0.954662	0.903836	-0.153019	-0.519205	0.79401	-0.471023	0.187104	-1.49294	-0.121448	-0.135709	-1.07192	-0.772263	1.30784	-0.663509	-0.390472	0.159021	1.4648	1.37168	1.49882	-0.393359	0.123271	0.0488739	0.461113	1.73127	0.17509	-2.31238	-0.362559	-0.970874
GAL3ST3	-0.171754	0.252444	-0.870332	-0.271761	0.141561	-0.474879	0.104714	1.5973	1.15332	-0.722719	1.3373	-1.07863	-0.712206	-0.0897126	0.171895	-0.309884	0.258582	1.41584	0.119786	-0.333297	-0.601696	1.74882	-0.535192	0.365108	-0.186755	-1.43561	-0.843916	-0.279973	0.153409	0.250557	-0.507908	0.046422	1.56341	-0.0106587	-0.401371	0.0106587	0.369361	0.369539	0.500161	-0.242416	1.48697	1.67983	0.64212	-0.0998583	-0.446096	-1.065
FLJ30679	-0.457571	-1.01625	2.24013	2.36045	-0.446618	-1.06532	-1.01983	-0.245092	1.36715	-0.44875	-1.72277	-1.86037	1.91193	-1.40554	0.0633931	2.24925	-0.995982	-1.65946	-0.724164	-0.0633926	-0.675323	-1.12665	-0.923959	0.404768	-0.148913	1.66568	2.21716	0.507593	1.73288	0.793887	0.836766	0.101344	0.129683	-1.34683	0.409006	-1.74843	0.948167	1.4632	-1.07872	1.34167	-0.340399	0.533854	2.04101	0.409226	-0.306357	3.46716
UTS2R	-0.886508	0.555315	-0.664884	-0.684833	0.169277	0.488844	0.815279	0.360209	-0.24088	-2.31294	-0.211236	-0.647734	0.127615	-0.995853	-0.136055	0.348851	0.265777	0.122789	-0.264148	-1.38656	0.129099	-0.0472312	0.0475659	-1.72193	0.384078	-0.584858	-0.35569	-0.104523	0.263932	-0.289615	0.11586	-0.0237517	-0.0134959	-0.19611	0.215336	0.0598912	0.0134959	0.0377555	0.0737309	0.0348439	0.195421	0.344063	-0.108162	0.0905991	-0.260571	-1.66483
USH1G	-1.08	-0.0207832	-1.27498	-0.406939	-0.301854	-0.559858	0.6296	0.584674	0.19832	-0.0974257	-0.81506	-0.182727	0.424074	-0.26397	0.537552	0.318845	-0.582287	-0.216567	-0.41856	0.501937	0.0339806	-0.277964	-0.119728	0.121947	0.189867	-0.0925095	-0.302142	-0.759939	0.22785	0.0398157	0.460732	0.428191	0.178711	0.143649	-0.202734	0.555524	0.626896	0.196994	0.311075	1.16677	0.579963	-0.865947	-0.0183084	0.0183084	-1.75007	-0.525087
SYN1	-0.785833	-1.36513	-0.259865	1.03832	1.26498	-1.76691	-1.17812	1.24368	1.39305	0.57251	-1.43684	0.45338	0.823354	0.675713	-0.438669	-0.914138	-0.802598	-0.213292	-1.69106	1.09143	1.24031	0.403319	-0.0335059	-0.883049	0.272018	0.997754	0.332589	0.0335059	-0.874355	-2.24261	1.11628	-0.893676	-1.21954	-1.41294	1.24187	-1.84198	0.487141	0.18048	-0.990336	-2.59178	0.460035	0.804806	-0.600849	0.601584	0.192615	-0.584427
CNOT6L	1.19553	-0.140302	2.47927	1.46751	-1.85752	2.11259	-0.846515	-0.522126	-1.16935	-0.113496	2.1812	1.33669	0.0235581	2.45419	1.8185	-0.296153	1.19405	-1.25897	-2.04126	-0.0810118	-0.496583	-0.688951	-1.65748	-1.21731	0.166214	-2.06564	1.24649	0.143348	0.554346	-0.600173	2.45857	-0.597861	-0.0235577	-2.0632	-0.861357	1.94192	-2.00017	2.84527	-0.618483	3.07595	1.915	-1.08117	0.046278	1.0275	0.0829368	0.378085
ZNF718	-0.541108	1.4508	1.1467	-0.269032	-0.792922	0.640094	-0.759019	-0.269022	-0.49812	0.771468	0.453554	-0.324858	-0.116527	0.613199	0.176986	-1.41409	1.02635	-1.1666	0.581791	-0.512017	-1.78828	-0.152333	-1.471	0.116527	-0.569559	-0.273288	0.143956	0.182147	1.02079	-0.17542	0.223342	0.501546	1.00801	0.528193	0.923458	-0.512474	1.2359	-0.548214	1.5299	-0.187624	-0.361652	0.282666	-1.81645	-0.654073	1.41379	0.351896
SNRNP48	-0.0633383	0.41087	0.489593	-0.359726	0.382082	0.0620604	-0.431207	0.312522	-0.387304	0.605031	-0.491179	0.565407	-0.372283	0.456881	0.000493	-0.104659	0.427823	-0.298524	0.31394	-0.709521	-0.158119	0.562693	0.391291	-0.701726	0.379691	0.215912	-0.0880327	-0.000493	0.726764	0.367254	-0.771455	-0.216212	-0.0390787	-0.807493	-0.176347	-0.385493	0.236713	0.389452	0.531929	-0.693114	0.0158148	1.07088	-0.632161	-0.623462	-0.139397	0.439528
ZNF560	-0.647543	-1.25493	2.79798	-0.330893	-1.48067	-1.38522	2.95105	-0.98121	0.122308	-1.33655	-1.3929	2.21127	2.32462	0.686784	-0.132736	-1.39922	-0.590229	2.71488	1.32821	-1.36337	-0.399881	-0.0984535	0.40011	0.451703	-0.925496	0.636805	-1.10313	1.80551	-0.646501	-0.923868	0.538604	0.0283051	0.701239	-0.840381	0.223935	-0.0283051	0.752443	-1.36223	0.970495	-0.513377	0.344083	-1.18733	0.670717	1.46712	2.02073	1.00252
PUS10	0.00453019	0.282797	-0.0424759	-0.132441	-0.63322	0.892875	0.321074	-0.122822	-0.308529	-0.215589	-0.0310371	-0.336121	-0.179246	0.108299	-0.247232	-0.981053	-0.00558305	0.440038	-0.106166	-0.117393	-0.119946	-0.150439	0.0431392	0.483886	0.202858	-0.644972	-0.0170295	-0.461042	0.00524736	0.246173	0.218594	0.758299	0.232798	0.522807	0.239961	0.641714	0.207611	0.36044	0.61684	-0.0720952	0.894962	0.630372	-0.0347803	-0.00453019	-0.118788	0.539622
PLCXD2	-0.73563	-0.345808	-2.05289	0.126162	-1.46958	-0.418314	2.36232	2.18604	1.04865	-0.634267	-0.158537	-0.44115	0.0128536	-0.852127	-0.888755	-1.11657	2.46922	2.16783	1.0305	0.383463	1.4431	-0.182515	0.72544	-0.024703	-0.887976	-1.15387	1.88337	0.315511	-1.38793	-1.23517	0.35451	1.14677	1.49503	1.125	-0.0128536	-1.98283	-1.14289	1.80119	1.32573	1.15994	1.81306	-1.76921	0.497238	-0.679369	0.0230527	-1.12229
UMODL1-AS1	0.782527	-0.733418	-0.558235	1.08559	0.551874	-2.38985	-0.07304	-0.568323	2.01523	1.39396	-1.94973	-0.498948	-1.47727	0.404006	1.49282	-1.19671	-0.931298	0.314763	-0.144268	0.370022	-0.641323	-0.219169	0.332831	-1.33859	-2.09153	-1.3828	0.987493	1.55603	-1.10657	-1.95788	-2.17694	1.67235	1.13043	1.69368	0.769722	-0.184743	-1.3456	0.612309	1.37193	1.75097	1.92565	-1.39497	0.478847	-1.34419	1.60515	0.07304
RAD9B	-1.25006	1.34666	-1.19839	-0.986821	-0.0326185	-0.58845	0.364539	0.761986	-0.412997	0.20542	0.437324	0.30352	1.53131	-1.56995	0.387597	0.594212	0.304211	-3.13141	-2.17564	0.032618	0.549046	-4.74704	-0.663075	0.951353	1.04424	-0.584413	-0.337249	-3.29574	-0.838233	0.108243	0.0359187	0.67077	0.403954	0.729473	-0.249531	-0.962482	-0.721723	1.01058	-1.41062	-2.91807	1.22008	-3.20922	0.114335	0.365394	-0.334497	-1.38154
ZNF555	0.593078	0.490554	-0.00774789	-0.624439	-0.0860546	-0.708723	0.536762	-0.331073	-0.0540903	0.449113	-0.452576	0.193434	0.256068	0.00774789	-0.151646	1.44285	-0.0207589	-0.0523226	0.19049	0.0322602	-0.729222	-0.088577	0.367836	-0.376595	-0.147744	-0.775381	0.299529	0.241284	0.189136	0.301731	0.123336	-0.431624	0.603296	0.145577	-0.41758	-0.238996	-0.403426	-0.228021	0.835318	-0.151396	0.281249	-0.391948	0.610286	-0.0590017	0.12292	0.478368
NYAP1	-0.452964	-0.827409	0.464785	-0.888711	-0.55644	-0.534117	0.460757	0.0816221	0.714423	-1.5535	-0.986065	-0.602154	-0.0399656	-0.950044	-0.0056324	0.608008	0.428895	0.403568	-0.217836	0.19151	0.0839095	-0.383584	-0.525135	-0.0900002	0.340433	-1.79506	0.0785117	-0.521822	0.222838	0.626809	1.01586	-2.47311	0.334853	0.839725	0.454354	-0.966509	0.0056324	-1.37611	0.810147	-0.183249	0.0390444	-1.29559	0.0670497	1.21532	1.08506	-0.0553966
RSKR	-0.0314257	0.147072	1.12735	-0.0732782	0.403019	-0.489319	-1.28385	-0.479857	-0.848868	-0.906243	-0.150503	1.39301	0.327343	-0.24286	0.0100319	0.343889	0.19467	-0.90863	-0.0609663	-0.298504	1.49457	0.385537	0.501826	-0.117801	0.44123	-0.263811	0.880697	-0.110367	-0.0545742	-0.395994	-0.10806	-0.126688	0.31476	-0.0100319	-0.525062	0.517103	0.703652	-0.209612	0.296405	0.692816	0.398427	1.19775	-0.129544	0.903559	1.00146	0.0489643
MRGPRX3	-1.09766	-0.336869	-0.624394	-1.11992	0.560774	-2.91184	1.01897	1.93973	3.06009	1.26395	0.0207777	-1.63986	-1.08918	0.454064	2.40922	-0.871522	-0.0385962	-1.35398	0.733993	-0.678711	1.06835	-0.230889	0.928677	-0.686482	-1.00056	-0.669259	-0.0207777	-0.933876	-0.123024	-0.848029	-2.63854	-2.69692	1.7132	2.03817	1.36466	0.964488	1.083	0.109008	0.887221	2.99263	1.41237	0.776238	1.20927	-0.376945	0.932711	-0.5241
ADGRG7	-0.85605	-1.58432	1.02387	-0.00736523	0.0483952	-2.88974	-1.64994	0.442657	-1.25614	-2.9246	-0.140539	1.55325	0.00899601	0.0734892	0.20005	-2.97673	-2.19414	2.17428	1.30619	1.35075	1.24684	-1.60798	-2.24357	1.19688	-0.396733	1.83815	0.399225	0.0464869	0.0168896	0.901587	0.199806	-0.953569	-0.372768	0.586444	-1.10898	1.30035	-2.01223	-1.95498	-1.96624	-4.02245	1.64762	-2.90611	0.0715823	-2.68472	0.00736523	-0.672564
C17orf77	-3.36261	0.140665	-0.148348	2.20666	-1.45455	-0.052031	-0.329412	-1.13992	0.380115	-1.52716	1.39112	1.5494	0.312257	-0.773732	0.769075	2.33714	-2.85002	-0.221869	-0.916031	-3.31022	0.21867	0.120774	2.33636	-1.8583	-1.01452	-0.909081	0.932515	0.421728	1.98	-4.23897	-3.67706	-4.16862	-0.347989	0.773929	1.43776	0.216381	-0.266437	-2.04335	-0.460262	1.30571	1.45088	1.39863	0.689465	2.52874	-1.81019	0.0520306
DUSP5P1	1.13586	-0.755943	2.56611	-1.5491	1.49509	-1.44586	1.8683	-1.50397	2.88964	-0.876428	-1.11984	-1.84844	-0.63779	0.0256181	2.97985	3.10676	2.12022	-0.0256181	1.72725	0.906702	-1.91537	1.3897	1.8661	1.93939	-0.477104	1.37405	-1.78954	-0.0966945	-0.652962	1.45162	-2.1584	-0.943971	0.701693	-0.166923	-2.92137	-1.6426	2.10565	-1.78113	0.710186	1.76676	-2.52391	-1.16504	1.31783	1.8057	-1.04826	2.1186
PLB1	-3.05055	-0.0940275	-2.78457	0.212994	0.768451	-0.99633	-1.67777	-3.95809	1.1159	-1.14083	0.219141	-0.207865	0.731852	-2.14412	0.0940275	-0.143228	0.304362	0.855708	0.25895	0.790402	-0.120702	-2.13758	0.883007	0.587936	0.834215	-1.55711	-0.777376	0.638901	0.971283	-1.01115	-1.55126	-2.45146	0.143514	0.229095	-3.17143	-1.38406	-0.133245	-0.28404	1.28568	-2.73246	0.29081	0.428063	1.6682	1.1842	0.463179	-1.47728
C20orf197	1.58135	2.9257	0.526877	-2.85153	2.18144	0.716896	-2.62949	-1.3852	-1.22806	-2.7648	2.07025	-1.75134	1.69495	-1.45428	2.4415	1.52877	-0.691886	1.04499	-0.958021	-1.60102	2.11879	-1.56363	-2.86535	1.32363	2.51869	-2.38774	0.56689	-0.287083	0.287083	2.43143	-2.24342	-1.82889	-1.67426	2.17495	-1.01269	-1.1803	1.18547	-2.60888	0.793618	3.12812	1.65369	0.884111	-0.75753	-0.418243	2.43752	-0.425724
SLFNL1	-0.172742	1.63441	-0.288004	-0.0887215	0.584727	0.15195	-0.592214	-0.369729	1.07669	-1.02044	0.0412886	0.724445	0.176965	-0.351265	0.711801	0.330653	0.280305	-0.256044	1.15068	-0.377978	-1.76151	-0.420972	-0.0126207	-0.420311	-0.452952	-0.941937	-1.42958	0.63123	-1.0314	-1.02001	-0.210008	0.537089	-0.688535	-1.30009	0.406503	-0.177904	1.29157	0.7099	0.622516	0.981843	0.0126207	1.67847	0.787699	1.31859	-0.434881	1.47123
RIBC1	-2.85904	-2.10696	-3.06822	0.672197	0.616671	0.909911	-0.847383	-1.26492	-1.54105	0.322369	-0.35897	1.37737	0.540189	1.03425	-1.76146	1.07614	-0.490026	-2.92513	0.777371	1.05733	-0.904643	-0.201873	0.890361	0.491456	1.21396	1.51203	-0.102027	0.0369048	0.231439	-1.03978	1.12186	0.91274	-0.0369048	-1.07978	0.135944	-0.0820899	-1.08996	0.62577	0.0778098	-0.593613	1.77024	-0.987093	-2.60601	0.0374498	-0.51677	-1.19313
OXGR1	-1.18022	-0.38106	-0.430951	1.91041	-0.964205	-1.52256	2.52866	0.954861	-2.06792	1.40951	0.863069	-4.51034	-0.644723	0.943474	1.25575	0.0706155	1.1612	-0.182177	1.9302	1.92319	-3.03225	-2.65184	-0.602838	-0.16171	-1.77502	0.92836	-1.15894	-0.0706155	1.26272	1.43772	0.472442	-0.13159	-3.32628	0.120866	2.79961	0.401395	-2.20676	-2.27673	1.30047	-1.55004	0.387156	0.860428	0.925237	2.06881	-1.28089	-1.54797
CDC14C	2.35038	2.40568	-1.8551	2.71919	2.98196	1.79068	-2.19993	2.53509	0.0479298	-2.26636	-1.97426	-1.21685	0.774998	-1.59486	-2.34707	1.69088	-1.31943	-0.748876	-2.34663	-0.931936	0.460937	-2.44314	0.210671	2.10977	-1.23935	-2.37101	-2.39127	1.34269	3.29447	0.896598	-1.47841	1.69285	-0.0479298	2.28453	-2.37431	-0.172949	2.62203	1.81035	-2.26746	-2.34664	1.74766	-0.801202	-0.259097	0.0801902	2.15785	2.68061
SULT1C4	-1.22059	-0.180413	1.86817	-0.314066	-0.63521	-0.0328822	0.521774	-1.16333	2.08532	2.7668	-0.519629	-0.152992	0.20146	-0.284491	0.62183	0.0683351	-0.500568	-0.0503812	-1.07327	-0.425888	-0.697284	0.540405	-0.257285	-3.43629	0.438527	-1.10063	0.740351	0.507269	0.0848255	0.0803518	0.322574	0.305278	-0.332389	2.94609	-1.29777	0.132646	-0.574915	0.721751	-0.261322	-0.631619	0.547905	0.239012	0.967829	0.0328822	4.90645	-0.569089
POU5F2	-0.600541	1.21254	-1.98697	-2.45534	0.263571	-1.09003	0.032479	1.02567	-2.20617	0.299825	1.01664	-1.29945	-2.45083	1.03311	0.935933	1.12326	-0.81435	0.82458	1.28175	-1.06942	0.389916	1.25054	-2.28117	-0.918127	0.795192	-0.331693	-1.35293	-0.580044	-0.996542	1.40597	0.415362	0.72514	0.815463	-1.63389	-0.160792	-1.2339	0.71665	-1.42605	-2.06136	0.517353	-0.032479	0.842927	-0.526382	0.823564	0.707166	-0.326604
RXFP2	0.0142617	-1.64345	0.9539	-1.54948	0.775245	-0.0398765	-0.242715	0.618441	1.43181	-3.8898	-1.67089	0.738702	-4.1964	0.15999	0.347483	1.69096	0.274173	-0.193025	0.302103	0.24752	-1.54138	-0.0514774	0.641874	-1.46473	0.163425	-0.229568	0.749565	0.535414	-0.231505	0.0218191	0.656132	-0.0572653	-1.56351	-0.480362	-3.95285	-1.78825	0.257301	0.872676	-4.07667	0.845373	0.607472	-0.0142617	-0.437462	0.635595	-0.0575671	-2.55453
BEND7	1.15833	-1.35933	-1.14195	2.27578	-0.404632	0.455682	2.07278	-1.67996	-1.14247	-1.69377	-0.461689	-1.58166	-0.108696	2.58123	2.5633	0.474209	-1.5077	1.82886	-0.754715	0.43306	0.108696	-1.65533	2.55595	0.538	1.47196	-1.54354	-0.750275	0.807699	-0.557226	1.95873	-0.450259	-1.32044	-1.09274	-1.25524	-0.601742	-0.301984	2.0124	-0.897315	1.27305	2.78806	2.35165	1.58533	-0.817582	2.36957	1.31529	1.78883
SSMEM1	-0.707225	1.69146	1.21424	0.368571	1.12683	-1.42865	0.199061	-0.416474	0.277524	1.64976	-0.16365	0.878262	2.24426	0.0206027	0.283777	-0.910829	1.59109	2.09848	-0.478436	-0.188262	-1.22331	-0.0727935	-0.179094	-0.288558	2.06934	-0.0206027	-1.48181	-0.295575	2.81796	-1.01007	-0.77718	1.75203	-0.684545	1.19298	-0.254008	-0.0324473	-1.51938	2.37752	-0.590034	1.68165	1.14161	-1.10756	2.6584	1.9653	-0.8879	0.10837
MAB21L3	-0.452475	-0.544899	0.337033	1.39959	-1.12675	1.56562	-0.546382	-0.827173	0.397177	-0.228895	-0.245164	-4.14733	0.818438	0.378347	0.411538	-0.12476	0.792442	-1.69557	-0.772893	-1.36027	-2.1314	-1.00706	-0.290841	1.20584	-1.22876	0.0802801	1.19028	-0.108876	1.12425	-0.176043	0.962513	1.097	1.23821	0.85361	-0.320017	0.829239	-0.422722	1.07889	0.609494	0.293901	0.752967	-0.459078	0.734761	0.0659869	-0.0659869	-2.16626
BASP1-AS1	-1.259	0.275861	-1.66405	0.727759	0.289373	1.04412	-1.79031	0.0565019	2.47866	0.345075	-0.399535	-1.03056	-1.41204	-2.30854	1.32861	-0.201053	0.164289	-1.81105	0.0959592	-0.159458	-0.182888	-0.540431	0.794418	-1.17928	-2.1616	-0.0565019	0.755219	0.84228	1.10223	0.150297	-1.82941	-1.43833	-1.00734	0.0769057	1.03751	-1.86611	-3.69351	-2.32311	1.4632	-0.659269	0.688205	-3.12404	0.891303	0.350115	1.42123	1.22701
UROC1	0.785199	0.148423	0.777176	1.91154	-0.337343	2.04027	1.31462	-0.381237	0.416365	-1.7576	-1.12111	-0.804276	0.836728	0.299054	-0.0184927	1.06263	0.548094	-0.426357	1.39619	-0.771584	-0.767113	-1.21643	-0.402223	-0.115403	-0.564439	-0.366829	0.0184922	-0.773642	-0.320745	-0.274384	-0.582391	1.16739	1.73736	-0.525053	-1.04954	-0.175264	1.98127	0.858541	0.732147	2.26164	-0.525058	-0.578837	2.09133	2.86068	1.74353	2.46782
TNRC6A	0.0197976	-0.0197976	-0.0202682	-0.526833	-0.654459	-0.0562542	0.042496	-0.940684	-0.219928	0.116923	-0.249312	-0.0682728	-0.572224	-0.13298	-0.288933	0.277227	-1.19549	-0.593821	-1.20365	-0.249479	-1.11694	0.521941	0.298329	0.0254958	-0.114842	-2.18241	-0.834345	0.55729	0.572471	0.941103	1.04052	1.13967	1.01225	0.815827	1.15026	0.93887	1.01225	1.17979	0.685961	-0.311278	1.61005	0.478057	-0.758897	-0.184929	0.457443	0.609799
KCNA6	-3.30646	0.733182	-1.71062	0.12465	0.589246	0.37153	-0.583947	-0.095871	0.763926	0.664097	-0.167062	0.0514455	-1.7967	0.493407	-0.537596	-2.225	-0.0062089	-2.21661	0.0062089	-0.878511	-0.888576	0.803061	-2.23502	0.298335	0.682619	-1.23404	-0.229774	0.724504	0.619407	-1.89621	-0.838972	-1.65947	0.497455	0.257013	-2.2101	-0.050427	0.513371	0.726182	0.0159287	-0.0779405	0.286611	0.475101	0.459665	-2.2246	0.0940993	-1.23852
AMER3	-0.0888171	-2.17582	-0.41783	-0.901952	0.284875	-1.08196	0.00989246	0.375406	1.61016	-0.603827	0.0234175	-0.51929	1.68859	0.78898	0.476466	2.20617	0.974611	2.12945	-0.537947	-0.0353656	1.52384	-0.661748	-0.111062	1.00446	-1.30617	-0.00989246	-0.545098	0.791082	0.986989	-0.977668	1.53194	-0.407514	1.50424	-0.592952	-0.0629134	0.24542	-0.0806432	0.810555	-1.13023	-1.12991	1.46826	-0.66625	0.362276	0.443658	1.65665	-1.08726
ERVW-1	0.115962	0.19914	0.437242	-0.982573	-1.99488	-0.357236	1.35354	-1.73769	1.05975	0.0948906	1.04368	-1.19277	-0.519959	0.527486	-1.03041	0.757948	0.867314	-1.15543	-0.300795	0.335388	-0.360389	0.26538	-0.109442	0.460188	-0.461021	-1.92818	-0.659879	0.904691	-1.77065	1.30894	-0.615942	0.569375	0.742162	-2.55621	-0.325293	1.09004	-0.198668	-3.57298	1.05385	1.27614	-0.0948906	0.600943	-1.04021	1.50701	-0.377411	1.18052
LINC01600	0.382887	0.9319	-2.11909	-0.222611	-1.22994	-0.604377	-0.361443	0.769591	-2.96793	1.08142	-1.8224	0.796313	0.730978	0.466796	0.859023	0.7168	0.527247	-0.877287	-0.428344	0.449062	0.11256	0.00471544	0.356537	1.25954	1.40758	0.439851	0.353537	-0.940145	-1.32891	-1.66048	-1.16331	-0.407875	-1.00736	0.586717	0.840388	-3.44467	-3.70144	-1.50984	-1.59933	-2.11649	-1.2838	0.473212	-0.00471592	1.41025	-0.803011	0.653017
PNPLA1	-1.03892	0.615697	1.13957	0.250079	-0.477617	-0.444573	2.73694	0.75947	-1.15509	0.73132	-0.162227	-0.53157	0.782559	-1.48566	1.22968	-2.68968	0.627331	0.162228	-1.22126	0.653882	0.900079	-1.30022	0.828317	-0.570674	-1.46949	0.453207	-1.23299	0.530663	-1.95571	-0.265883	-3.11727	0.548426	0.649792	0.372148	0.638653	0.291324	0.721371	-0.951617	0.854165	0.660682	-3.35826	-2.43035	-0.354743	-1.60252	-2.48996	-2.17406
DEPDC4	-2.04779	-1.59101	-3.16775	0.313224	0.715864	0.00737953	-1.03215	-0.110892	0.651433	-1.83764	-1.71129	-0.00737953	0.898491	0.351429	0.178291	-0.0976954	-0.604234	-0.0829864	1.22949	0.236709	0.147783	-1.42368	0.212607	0.0121078	0.709498	-0.0501533	0.998517	0.529989	-1.61443	0.572932	-0.730722	0.0198126	0.37022	0.866064	-4.15336	0.770822	-0.0355072	-0.0590844	-0.352125	0.705308	0.293823	0.701496	-2.40446	-0.0399828	-2.27516	-1.69867
COX6B2	-0.0104733	-2.7953	1.21142	0.253808	0.560247	-0.773683	-0.0799546	1.43144	0.825569	-2.01126	-2.39145	-1.88337	0.456281	1.31362	-0.59589	0.144113	0.0842047	-0.0247493	-0.587711	1.96253	0.00353146	-0.220692	-0.231678	0.508177	-0.232433	-0.0425096	0.15275	-1.47857	0.34478	-0.300178	0.843062	1.70591	0.309624	0.0535498	0.284714	1.29494	-0.234305	-1.54184	-0.0326986	2.10698	1.06459	-0.00353146	-2.97285	0.656414	-0.305242	-0.109939
NIBAN3	-0.575319	-0.297275	-0.249922	-0.390728	-0.427509	0.0904059	-0.530982	-0.285688	1.52286	0.477355	0.129138	0.475353	-0.556831	0.79498	0.84823	0.401982	0.135677	0.156517	0.0573206	-0.268807	-0.0995564	-0.0129952	0.0162959	-0.281514	-0.162748	0.0129952	-0.319343	0.500435	-0.547259	-0.45785	-0.126679	0.541244	0.924571	-1.14534	0.855397	0.753441	0.583941	-0.528994	-0.171773	-0.161396	0.308226	0.0650864	-0.223223	-0.0562816	1.63444	0.437394
WDR64	-2.05048	-0.934129	0.730392	0.352201	0.691739	-1.40075	-0.0378215	-1.98443	1.35788	-0.990556	-0.190695	-0.108993	0.310747	0.146744	-0.832446	0.452068	1.00833	-1.01126	0.0771272	0.559306	0.91262	-0.0276182	-1.78918	0.620425	0.57437	-2.34123	-0.095216	-0.545155	-1.09261	0.319429	0.925692	0.880326	-0.608444	0.323771	1.21995	-0.504479	-0.273288	-0.282167	0.320941	0.262796	-1.17231	0.0276182	-2.09562	-0.0417929	1.26448	0.928725
AXDND1	-3.83479	2.02518	-3.01265	0.0204563	-0.314536	-0.459221	0.97799	1.47215	-2.96706	0.365901	0.635913	0.285338	-0.117623	0.0987759	1.85716	-0.27426	-0.142182	0.463263	-1.6809	-0.934141	-1.77446	0.715769	-3.21214	0.245065	1.20656	1.12134	1.11773	-0.162529	1.70312	0.700598	0.839332	0.283659	-2.7223	-0.876039	-3.27567	-0.155853	-0.973528	-1.80391	-1.33872	2.30032	-1.45068	-0.0204558	1.31265	1.32902	0.782646	-1.45911
HEATR9	-0.0286827	-1.74603	0.943875	-0.256716	-1.83161	0.27388	-0.270122	1.09562	2.85365	-0.390487	-0.85013	-1.12332	2.54115	-1.46494	-0.296244	0.107091	0.211876	-0.468647	-1.1843	1.51897	0.0184793	2.09292	-0.826626	-0.524123	-1.85545	1.12251	-1.97499	-0.715126	-0.523297	-0.717288	1.50577	0.677481	-1.39489	0.449828	-1.56865	-0.0184793	-0.155811	1.83405	1.93521	1.2907	1.10458	1.77362	1.59119	1.20046	2.09449	1.32168
PARP15	0.824377	-1.61747	1.54205	0.735186	3.03688	-0.491308	-0.152915	-2.18845	0.33844	0.810592	1.28911	1.98237	-1.15606	-0.732577	-1.05535	-1.52718	-0.383463	2.79224	-1.01082	-0.734728	2.8816	2.32777	-0.36938	-1.82273	-0.636595	1.94434	0.975575	2.08048	-0.438362	-2.70955	1.37731	-0.858505	-2.7606	1.04717	1.25256	2.54399	-2.19033	-0.571758	1.93737	1.67846	2.01187	-1.20676	-0.82744	0.152915	2.71163	-0.495633
ARHGAP42	0.586637	1.62289	-0.508434	-0.589359	-0.210795	3.02577	-0.153806	-0.590404	1.7781	-0.450108	-1.03819	-0.739183	0.338114	-0.430941	0.348673	-0.225917	-1.13255	2.97957	0.0276861	-0.629386	-0.0756192	-0.0276861	-1.51963	1.1454	-0.779913	2.55866	0.399493	0.820015	-0.312752	0.138768	1.15785	-0.562692	-0.657948	-0.152179	-0.148479	-0.553082	2.61923	0.164545	2.86597	1.05088	-0.0308294	1.60502	3.49428	0.813215	0.510586	0.907
LINC01101	-0.958303	2.62342	2.04958	2.18765	-0.153368	1.3175	-0.157619	0.256436	1.91224	0.0156012	-0.149932	0.240849	0.381478	2.14119	1.51553	0.661113	0.179677	0.997502	-0.129201	1.79507	-1.89835	0.934789	-1.92009	-1.92406	-2.3448	0.215989	-1.09845	-1.22616	-1.60987	0.910231	-1.24304	-0.718195	0.787481	-0.475859	-1.11464	-2.39848	-1.77512	-2.40191	-0.989754	-0.0156016	-0.152692	2.08505	0.826336	0.764588	0.852272	-0.684739
CALHM4	-0.00415373	-1.44847	1.13452	-1.33287	-0.367386	-0.594657	0.25239	-1.55522	-1.1281	-0.103712	0.681127	-0.541989	-0.560957	-0.786242	-0.0112095	2.70077	1.18143	0.600554	-1.54748	2.59952	1.57074	0.463241	2.16403	-0.103035	1.29758	1.29598	-0.0119605	0.406102	1.85325	1.90648	3.0926	-0.0535312	1.27348	0.00415373	3.00987	0.179753	-0.555385	-0.425035	-0.295407	0.402352	-0.862194	-0.824751	-0.555744	3.1713	-0.629381	2.76387
CXorf58	0.123571	-0.417833	-0.33768	-0.572315	-1.48744	-1.75734	0.74326	1.55642	-3.89653	-0.86097	-2.01349	-1.6832	-2.29718	0.779429	2.03184	-0.0363688	0.515857	-3.33528	1.1117	1.45024	-2.25721	0.952136	-0.439552	0.0363693	-3.33772	0.869905	0.335428	-2.59421	0.74918	0.451846	0.446975	-1.43367	-1.97865	-3.57932	1.34872	-1.31421	0.915307	-0.051218	-2.97341	1.2946	0.847776	-2.91172	0.957695	1.49721	0.667103	0.737371
MRGPRX1	-0.254798	0.978019	0.347676	0.291297	0.640204	-0.780852	0.581186	-0.0346594	0.549728	0.296778	-4.56803	-1.16849	-0.803704	-1.28903	-0.284065	-0.325265	-3.08614	-0.137096	0.0346599	0.188002	0.0365739	-0.140764	-1.45448	-2.00599	1.55078	-1.25813	0.188849	0.789416	1.71536	0.828325	-0.272404	-1.94036	-3.08298	0.291168	0.934426	-0.223952	0.411176	-0.463803	-0.877031	-2.04363	-2.47248	1.05102	0.951897	1.69776	1.49758	1.31946
RLN3	-1.75515	1.08978	0.0172424	0.310152	0.259124	-0.0308695	0.955191	0.972001	-0.137856	-0.215279	0.219852	-0.50563	-0.276855	0.145779	0.900222	-0.971947	0.272733	-1.32422	-0.0172424	0.436825	0.709218	0.156347	-0.725975	0.878318	0.067893	0.272634	0.151313	-0.312085	0.542675	0.577064	-0.226641	0.2781	-0.90662	-1.45899	-0.640897	-0.64053	-0.406152	-1.32783	-0.709211	0.0204124	-0.954017	-0.895225	-0.147961	-0.235737	1.23317	0.114224
ADAMTS20	-2.01859	2.1435	-0.380835	-2.01003	-2.64882	-0.67424	-0.550672	-0.24583	1.29094	0.229825	-1.88782	1.4612	-2.47585	1.88694	-1.71775	1.60691	-0.792977	-1.05594	-0.242908	1.78227	0.0776615	-1.60977	2.18238	2.22466	-1.98371	-0.204419	-1.8827	2.06889	-2.05484	0.866674	2.03584	0.584318	-2.19512	0.953074	-1.1334	2.34242	-1.22805	-2.31008	1.00665	2.63288	3.37809	-0.0679483	0.358105	0.0679479	2.88673	2.72458
ABCC12	-0.525831	-0.91547	-0.811888	-1.44305	0.073359	-0.74295	0.598373	0.00400639	0.288563	-0.468097	-1.10656	3.45468	1.87917	-0.307044	0.481807	-0.0322409	0.573016	-0.413603	0.891692	0.161483	0.595496	-0.0457487	-0.707056	-0.383688	0.254879	0.0107603	-1.29687	0.506508	1.24337	-0.140438	1.07777	-0.00400686	-0.991034	2.99009	-0.351102	-0.785802	-0.228856	0.133593	-0.605938	-0.639546	-0.919034	2.02749	2.68852	1.68832	0.0582423	0.35339
LCAL1	-0.973602	-0.600879	-1.37557	2.22152	2.4586	-1.3375	3.99932	-0.465971	2.36029	2.06188	-0.106712	2.39355	-0.970116	5.45829	4.5534	-0.823695	2.58698	1.7138	0.224984	3.00797	-0.376092	-0.00660086	-0.515966	0.108255	-0.0728512	-0.212785	-0.403474	0.274419	-0.331146	1.81399	-1.86035	0.00660086	-1.70187	-0.112062	-0.0310597	-0.480068	1.86002	0.9916	0.0175495	0.516897	-1.02644	-1.11192	3.64416	0.760698	-0.130591	1.92189
SLC17A8	-2.96979	-0.490827	-0.203671	2.69639	0.0246029	1.35317	2.32235	-1.95664	0.386505	-0.424697	0.0965991	1.07015	-0.995401	2.31503	0.478912	1.59385	-0.239928	2.19188	-2.8407	-1.35328	2.97285	-1.20792	1.8584	-2.04058	0.188931	-2.77689	-0.162588	-1.38029	-2.29127	0.430925	-0.70599	-0.820593	-0.62699	-0.567089	-0.612349	-0.663868	0.771772	-2.99516	0.44372	-0.0246024	2.13866	1.97667	2.01938	0.408992	0.450099	1.05437
C11orf44	-3.36214	-1.29796	-1.2808	-2.66817	-0.259937	-1.48967	-1.38925	0.285592	0.747563	-0.584269	0.383425	0.235578	-0.905232	0.210882	-0.279935	-0.13132	-1.65719	-0.174831	-0.795386	-1.72112	0.282209	0.0223155	-0.0223155	0.715301	-0.49322	0.129119	0.466536	-0.166226	0.107516	0.706346	-0.210524	0.0632596	-0.701109	-0.678366	-2.98651	0.151784	0.712647	0.510496	0.569475	0.609208	-1.01772	0.729225	0.451914	0.967072	0.585276	0.835048
CNTNAP5	0.685569	1.48617	-1.32548	-1.75737	1.14922	-1.05809	-1.06621	-1.32155	0.08988	1.0277	1.21154	1.04484	-2.46612	1.36937	-0.651053	-1.22097	-2.49911	0.372954	-1.3641	0.183824	0.569661	0.441012	0.102039	-0.784265	-0.0898795	1.63743	0.156901	1.13572	-0.761738	-1.44011	1.33833	1.05571	-1.52419	1.08103	-1.6181	-0.498967	-1.11891	-0.917806	0.978079	1.08215	-1.13879	-2.17752	-1.90546	-1.02187	1.72949	0.277191
SATB2-AS1	-1.86722	1.94705	0.422976	2.08656	-0.507316	-0.0218604	-0.0191457	0.0579689	-1.27807	0.84211	-0.742531	-3.88261	0.384269	0.403319	-1.94148	-2.15999	1.29233	-4.66437	-0.44494	2.02241	-4.09386	-3.75408	-0.298759	-0.347334	-1.8853	-0.31427	0.331114	-0.265764	-0.171059	0.0191457	0.474404	0.721772	1.43961	0.48852	0.0707233	-0.902409	-2.15588	0.29521	1.84326	-0.771518	0.0857189	2.53103	-0.482113	0.76124	1.15418	0.311663
SLFN13	-2.83139	0.0810842	1.47974	1.94264	0.185588	-2.51386	-4.24358	-1.54233	2.34676	-2.85029	-2.00885	-0.284704	1.83502	1.61685	-2.96174	2.76137	0.200779	-1.3063	2.59201	-0.144687	-0.213604	-2.78711	-0.140972	0.43721	0.670138	0.948307	1.30706	0.669675	-2.79944	-0.584983	1.3652	-0.0810847	1.23307	1.31136	2.50176	1.40586	3.37822	-0.432888	-3.12061	-2.23951	1.34371	-0.434347	-2.41837	-1.89814	1.44011	-0.314151
C12orf40	-0.843681	1.12186	-0.509258	2.01971	1.66497	-2.5531	1.6575	2.08809	0.362854	-2.34016	-0.935897	-0.110013	-1.3065	-2.46477	2.24229	-1.74533	0.587897	-2.09886	-2.11173	0.97639	-1.58242	-1.05552	-0.58396	-0.516523	1.17277	1.38698	-1.25974	1.32732	1.94388	1.80153	0.936876	-0.662223	-1.57176	1.52289	-1.49661	0.110013	-2.33372	-1.80546	-0.128561	2.50107	0.929973	-0.878961	2.13854	2.89854	0.442348	1.51053
CFAP57	-0.227776	-1.83316	0.800376	0.136848	0.127598	-1.64886	0.0281663	-1.86344	0.949606	-0.214738	-3.13064	-1.05083	-1.56941	-0.590395	-0.00835848	-0.816444	-1.20608	-1.67518	-3.24037	1.05624	0.530395	-0.348949	0.91728	0.738046	0.00835848	-0.468182	-2.87472	0.105031	0.345005	0.94865	1.20498	-1.32526	-0.122051	0.758502	0.428604	-1.56571	-0.991583	-0.981056	0.319509	-0.664149	0.330467	0.671471	0.428171	0.683251	0.13922	0.644079
C5orf64	0.0509875	0.874731	-0.0860918	-0.311169	-2.91909	-0.514404	0.187159	-0.0133798	1.31744	-0.13326	0.20003	-0.142069	0.0525687	-0.218642	0.546089	-0.357541	-0.0886242	-2.40132	0.48045	0.149318	0.198969	-1.35697	0.499323	-0.0331304	0.431674	0.132106	0.158104	-0.15994	-2.87546	0.54687	1.24048	-0.0765278	-0.319132	1.13906	0.0133798	0.28651	-0.168441	-0.924536	0.52915	-1.1001	-0.192276	-0.546004	-0.357174	0.319337	0.818439	0.500254
EDARADD	0.273276	-1.47093	1.20809	-3.5421	1.06215	-0.60801	0.756883	0.80859	-2.2804	-2.59201	1.64743	1.01356	-0.0688601	-2.16028	-2.47234	-0.986723	-2.30616	-2.21703	-3.21301	0.134705	1.9777	-0.540088	0.752392	1.20246	-0.0425129	-1.38353	0.0425129	-0.321495	-1.35679	2.3755	1.30323	2.48994	1.67332	1.28241	1.35767	0.607237	-1.68131	1.81221	-0.481627	-2.58176	-0.12325	1.26324	0.181289	-0.883603	1.27847	-0.544461
CYP4Z2P	-3.64541	-2.22419	-0.986027	-2.05562	-0.329539	-3.0231	-2.36042	-1.66429	-1.14195	0.666157	0.59423	0.589128	-1.74135	1.1718	-2.86579	-0.206254	1.28434	0.660894	-0.146984	-3.05088	-1.58596	0.146984	1.00812	1.19751	-2.10158	-1.33124	-2.3224	0.886331	-1.49498	1.72612	-0.172688	1.40279	0.261591	1.27238	0.784241	-0.167689	-3.57288	1.13378	0.268543	-2.2498	1.20065	1.22147	1.27891	0.511098	0.656115	0.649225
C18orf15	-0.652251	0.917722	-0.238984	0.907196	-1.03533	1.3796	1.89049	1.84688	2.02253	0.34223	-1.60418	-0.720155	1.78391	-0.0383739	0.297836	0.0309358	-0.663993	-1.22551	-0.288784	1.86706	2.06023	-0.863288	1.5488	-0.825442	-0.313299	1.572	-0.0309362	1.07595	1.862	-2.7107	1.17389	-2.02702	0.982152	-0.8329	-0.485428	-1.42183	-1.0045	1.42579	0.865681	1.42866	-1.48668	0.71087	-1.98345	-0.576819	1.43636	-0.730612
MUC19	0.988823	-0.118229	-0.320415	-1.65367	1.50208	0.665566	0.176555	-0.764652	1.06626	-2.00368	-2.61029	-1.12326	-0.0151958	0.725755	0.00775051	1.64665	1.90971	-0.0702352	0.0855637	-0.89897	0.463777	0.305734	-1.71979	2.08947	0.479647	1.77641	-2.47298	-0.528406	-0.293102	-0.3282	-0.36374	-0.76464	-0.241275	1.70667	1.35573	-0.574197	-1.47109	1.63576	-0.592948	-0.00775051	1.85281	2.74277	2.09165	0.166371	2.08389	-0.21227
KLHDC7A	-2.3673	-0.027333	0.912945	0.241896	-0.659362	0.799011	0.315918	-1.1081	0.468072	-0.0749924	-2.37476	-1.20326	-1.5895	0.505871	-2.19796	-2.49108	-0.157444	0.760933	0.40023	1.4123	-0.260611	0.335314	0.917406	-0.315045	-0.242556	0.415613	-0.171075	0.349527	0.240854	0.0978634	0.734791	0.705927	-0.706901	-0.120552	-1.57217	0.027333	0.230538	-0.865768	-1.5494	-2.51064	0.432075	-1.14	0.189717	1.83596	-2.4925	0.408819
C11orf72	-0.628884	-1.06058	-3.62705	-0.167691	-0.316447	-0.00197959	-0.256945	-0.242424	1.03063	-0.716209	-0.465531	-0.452966	-0.700313	-0.34633	0.0382969	0.584683	0.27481	-0.264526	-0.755905	0.508768	0.0638211	0.743278	0.225625	0.173453	0.255158	0.269635	0.00197959	0.362448	-0.154835	-1.96495	0.263378	0.592777	0.485188	-0.359698	0.0309279	0.1251	0.447091	0.422841	0.258325	0.580531	0.0956619	-0.175972	-0.860471	-1.76898	-1.85236	-0.0830958
CNTNAP4	-1.21088	-0.270966	2.56554	-1.26101	-0.696978	3.08506	2.62164	1.71852	-1.27003	2.92454	-1.23062	-0.861869	-0.220314	-1.23669	0.346345	-1.23695	-0.571334	-0.0370316	1.64318	1.17693	2.79541	-1.35105	-0.196161	1.92051	0.392279	-0.957619	-1.29919	0.0370312	2.58004	-0.971886	0.616481	-1.19101	-0.156594	3.24594	0.940681	0.512487	-1.21346	-1.21962	-1.17537	0.243786	0.257347	-1.13957	0.832991	1.17228	0.869649	1.1648
FER1L6-AS1	0.109577	-2.2881	-0.872512	0.929444	0.197813	-0.336499	-1.48633	0.580326	0.506697	-0.608937	-0.26993	0.0252173	-0.167862	0.407153	0.12611	-1.36627	-0.160558	0.50286	0.467675	0.125735	-0.0970304	0.668528	-0.584758	0.300276	0.8465	-2.08672	0.678673	-1.39223	1.46174	0.695804	0.761487	0.158491	-3.05557	-0.510273	-0.0783732	0.133563	-0.496221	-1.71377	0.248449	-0.0252173	-1.9588	0.107738	-1.72565	0.22819	-0.567094	-0.0359795
C1orf127	-0.945767	0.161644	-0.16613	0.575258	0.147312	-0.652171	0.70043	-0.000559	2.21855	-0.379222	-0.757671	-1.20989	-0.0908947	-0.396684	0.483376	-0.520688	-0.500499	-0.603615	-0.521147	2.00856	-0.586312	0.255489	0.238021	0.00696659	-0.0402155	0.398535	-0.182675	1.49384	-0.401436	0.169942	-0.251679	-0.059979	1.28596	-0.535932	0.122141	0.695273	0.245976	-0.122663	0.696907	1.12907	0.000559	1.16584	-0.353827	0.247651	-0.14261	0.376787
AGBL1	0.624323	-2.20358	1.56872	1.25647	-1.49137	-2.00738	-0.052846	-2.16952	1.81053	-1.40387	-1.69856	-2.08208	1.49585	1.74343	-1.71778	0.698901	1.57683	0.238088	-1.85337	-1.31103	1.10982	1.6191	-1.75748	1.7114	-0.0940366	-0.283576	2.26542	0.462816	1.11172	-1.5012	0.0528455	-1.85387	-0.796317	0.417078	0.968888	0.11833	-1.84057	1.16814	1.33088	1.24515	-1.4124	-0.285148	1.48611	-1.00712	-0.168725	-1.29438
FLJ34503	0.155389	-0.488867	1.48175	-0.428005	-0.6031	-1.1085	0.629344	-0.0103879	0.284041	-1.38432	0.048553	-0.160121	0.314083	-0.232229	0.0135779	-0.821081	1.13638	-0.342141	-0.479826	-0.217158	0.319177	0.261107	0.192554	1.08108	0.564617	-0.322878	1.12836	-0.954468	-0.1783	-0.946453	-0.547318	-0.0922089	-1.52536	-1.72301	0.0103879	-0.158858	0.864652	-0.0783553	0.566429	0.196596	-0.535357	1.25687	0.386464	3.28089	0.423122	2.0634
TERB1	-1.24096	2.19038	-0.479914	-0.226664	-0.400264	2.69054	0.92962	-0.396555	0.619073	0.525868	-1.52152	0.167276	-0.19405	-0.119062	0.398661	-1.95712	0.406704	-0.0134459	0.993266	-0.406166	0.329913	0.164384	-0.715289	1.38342	0.200678	0.0631161	-1.71477	-0.951221	2.6197	2.26656	0.205219	-1.34416	-0.39661	-0.0779133	-1.02009	-0.301463	0.49822	-0.972799	2.44493	-0.00736046	2.54209	0.00736046	-0.373526	1.53455	0.81392	-0.4154
MYO1H	-0.23462	0.179441	0.498803	-2.03929	0.180263	-3.22068	0.414014	0.247244	0.595076	-0.00370288	-0.301372	-0.880954	-0.274996	0.133622	0.442591	0.000746	0.122848	0.129967	-0.314629	-1.13654	-1.20685	0.570933	0.14204	0.070255	-0.709682	-1.20384	-2.19413	-0.126551	0.707867	0.209079	-0.964552	-0.0163395	-0.000746	0.67297	-1.2779	-1.05531	-1.81348	-4.06128	-1.01864	0.0541832	-0.503053	0.289724	0.244808	0.824867	0.782103	0.396151
RPTN	-1.41676	-2.20602	-1.35014	0.220304	-0.341434	1.24639	-0.665623	-1.99718	1.8741	-0.142494	0.297317	-1.89367	-1.23847	-0.717401	2.09083	-0.779256	0.142494	1.38684	1.23158	-2.30566	1.10537	-2.38258	-1.47424	0.85725	2.45343	1.67482	1.65593	1.44567	1.89854	0.266806	1.03245	-1.49428	-0.173481	-0.978872	0.304392	-1.42366	1.46522	1.55171	-1.3585	-1.20509	1.64384	-0.743548	4.2404	-0.528216	1.12405	-1.21759
LINC00269	-0.28764	-0.803007	-0.794042	3.67227	-0.470975	0.0709128	1.09853	0.705273	2.10838	-0.765922	-0.262436	-0.119465	0.207842	-0.150568	0.358999	0.152594	0.0210729	-0.378977	0.0265794	0.70071	-0.0489426	-0.0210729	-0.225297	0.101283	0.0749641	-0.227732	-0.0807309	1.21747	1.42857	-0.474146	-0.490063	0.455486	-0.0483942	-0.271011	2.58656	-0.0968452	-0.462055	1.16612	0.274806	0.160689	0.416487	-0.180441	-0.528238	0.0739088	-0.353818	0.207778
CCDC150	-0.317581	0.135208	-1.70021	-0.212478	3.16696	-0.00993919	0.477554	1.34515	0.14597	2.19615	0.994778	1.69193	-0.220128	0.982773	1.00486	2.685	-0.151121	-0.0078764	2.29365	3.21854	2.4734	1.49724	-0.269339	0.055459	0.41519	0.108139	-0.510407	0.13943	-0.162986	-1.44727	-1.1953	-0.916311	-1.37479	-0.795843	-1.01649	-1.57068	2.21202	-0.299018	-0.747736	0.00787592	-1.32898	3.07364	-0.268521	-0.540601	-0.210399	1.60463
STPG4	-0.968487	0.346422	-0.542535	-0.0219927	0.255018	-0.420056	0.0877104	-0.0649805	2.02532	0.203551	0.199722	0.312884	1.31662	2.58868	-0.316454	-0.323234	-0.995562	-0.16596	2.58307	-0.0247417	0.318779	-1.24807	-0.79381	0.57803	-0.899279	-1.97913	-1.0738	0.193791	0.563204	-0.0722342	1.88748	1.74949	0.0889463	-0.504844	0.364085	0.144803	0.518164	-1.63084	-0.585984	0.0219922	-0.0954809	-0.661392	-0.940247	-0.994421	0.814609	2.82694
FAM9B	0.469648	-0.354202	-1.23444	-0.796253	0.703244	1.08939	-0.607027	-0.610627	0.911444	-1.5838	-3.39532	0.553309	-1.94554	-0.590206	1.04803	1.78486	-0.567692	0.0363493	0.245696	1.70007	-2.41967	0.858721	0.390616	-0.0363493	0.792459	-2.4776	1.05033	-3.38261	-1.18285	-2.75587	-0.910282	-3.27986	-0.085763	0.804141	1.41971	0.777702	-1.02734	1.37097	-0.997336	-1.57427	1.16496	0.0938234	-0.0896735	1.65023	0.136342	1.15267
CES5A	0.406866	0.125334	0.376233	-1.92906	1.54985	-0.832217	1.76022	0.978375	-0.874471	-1.34718	-0.293321	0.626436	0.344527	-0.321068	-0.712035	-0.898158	1.00757	0.36982	-0.489779	0.593128	-1.65132	-1.68942	0.174389	-0.348167	-0.168596	1.28441	-0.771329	0.245571	-1.88195	-0.418243	-1.81802	0.367404	-0.879672	-0.0735865	1.76274	-1.24255	1.18138	-1.91965	1.5487	0.359407	-2.40199	-1.29419	1.24156	3.44366	1.16589	0.0735865
SLC35G3	-2.40386	-0.273554	1.00278	0.249331	-1.17897	-0.0365696	-0.548997	0.551496	0.958492	-0.509867	-2.05204	-2.49471	0.137019	-0.182422	0.22129	0.630082	0.335531	0.193936	-3.01821	0.256594	0.0586228	-0.645751	-3.00191	-2.17927	0.607576	-0.381655	0.741624	0.0365696	0.44593	-2.55328	-0.505607	0.165328	-1.63921	0.484238	-1.23695	0.372954	-0.456362	-0.731302	-1.0276	0.630677	0.0610161	0.680282	0.400425	-0.659285	-0.265462	1.49148
LOC100288966	2.99809	-0.678969	3.67233	-0.471073	1.20918	3.56043	-1.59472	-0.0459905	-0.381213	-0.0821919	-1.7175	1.82014	0.250874	2.54109	0.869907	-1.16589	-1.51692	1.307	0.637388	-0.617181	0.343931	-0.833142	3.03115	-0.00442267	-0.686042	-1.69644	-0.966748	-0.321529	2.224	0.327024	2.40867	-0.418447	0.00442267	-0.0586395	-0.176116	-0.386763	3.07986	1.43125	-0.645088	-0.575985	-0.511536	1.78857	0.346111	1.06771	0.38277	2.71802
KIRREL3-AS3	0.930611	1.27373	-0.215879	1.04039	2.14967	-1.20867	0.643321	2.30153	-0.975758	0.768072	-0.0832663	-1.22988	0.38154	0.774436	0.34928	-1.18864	-0.194232	-0.675116	-0.455177	0.839674	-1.48263	0.47279	2.12117	1.23244	-0.990069	-0.33189	-0.130158	0.880136	2.17203	-0.138277	-0.894269	-1.38976	-1.61013	-0.0596514	-1.09958	2.51721	-1.69254	0.00958443	-1.34447	0.612612	2.31896	0.420781	-0.00958443	1.12221	-0.0179005	1.74405
TMEM145	0.739596	-0.662213	0.106165	-0.0343883	-0.554846	0.0915825	0.460952	0.663787	1.2922	-0.0296357	0.184033	-0.128665	-4.89295	-0.791259	0.645693	0.0415618	-0.640508	-0.41139	-0.0131223	0.743971	0.867654	0.709623	-0.347794	0.219766	0.209031	-1.05627	-0.168635	-1.214	-0.197596	0.0131223	-0.258507	0.735516	-0.177406	-1.36777	0.749555	-1.01672	0.255462	-0.156136	0.524794	-0.502358	0.198495	0.0776174	0.0618856	-1.30153	-1.21727	0.656067
C15orf32	1.91312	2.32777	-0.391255	0.114244	-0.819978	0.859856	-0.165733	0.204205	-0.807571	-0.495157	-0.119484	-0.493814	-0.195254	-0.65813	-2.03456	-0.113974	0.228758	-0.989946	-1.01483	1.43614	-0.641721	-0.107969	-1.33547	0.0153451	0.372343	0.14525	0.0258479	0.0422349	-1.5157	-0.705927	0.000787	-0.264079	1.0272	0.31075	0.513776	1.83959	-0.959411	0.0385852	0.32945	1.58854	1.20411	-0.000787	0.268894	-0.00588894	-0.308517	0.669528
TSGA10IP	0.278495	0.0459642	-0.265208	0.173741	0.205798	-0.531137	0.887633	0.315886	0.45305	0.017261	-0.485098	0.440492	-1.61228	-0.258339	0.809114	0.373816	0.853502	-2.05106	-0.0213408	0.334552	-0.403825	0.655563	-1.57469	1.19032	0.220187	-0.597405	0.363561	-0.370971	-0.017261	0.0862584	-2.37332	-2.93124	-0.339767	-0.713154	0.451525	0.703767	0.101061	0.363495	-0.674073	-0.495063	0.0417771	-2.79187	-0.284379	-2.90329	-2.62689	-2.16084
LINC00477	-2.24855	1.56185	-0.41085	-3.61515	-0.158129	0.801618	0.416352	-0.775164	0.893813	-2.35071	0.579369	0.0138807	1.11438	0.308933	-1.85362	-2.19193	-0.35306	0.60437	0.766958	-0.934605	-0.526253	0.7705	0.220339	-1.09429	-0.0138812	-0.172469	-1.90215	-2.49061	-0.965453	0.339096	0.205479	-0.0877409	-0.390487	-0.111134	-0.567922	-0.426335	1.04627	0.125196	0.701014	0.838425	0.25337	0.203885	1.58106	1.28235	0.826872	-1.87028
CCDC140	1.80091	2.36701	-0.95077	2.14779	-0.166865	-0.938262	2.51692	-1.79306	2.84182	1.18068	-1.55966	-1.87645	1.46006	1.136	2.61856	1.1298	-1.13154	-0.048584	2.14054	0.133724	-1.20218	0.469504	-0.443316	0.834986	1.11003	0.048584	-0.759726	1.57015	1.76501	-1.11991	-1.32217	0.267267	-1.08968	-0.23701	-0.818766	1.583	0.944549	-0.704391	-0.640919	-0.638999	-0.825738	-0.0643954	0.369441	1.49024	-0.537218	-0.681241
C17orf78	-3.23948	1.08484	-2.12649	-2.10494	1.46698	0.76977	1.55861	-2.74979	-2.48428	-1.21051	-1.81595	0.00864887	-1.63678	-2.63756	1.86949	-0.901943	-0.313271	7.20702	-1.11604	1.01544	0.824392	-1.08543	1.22721	4.73264	0.467906	0.0199394	-2.72631	0.448508	-2.23303	-1.44828	-2.39561	2.72162	0.596644	0.839035	1.48838	-0.00864935	-1.54089	-2.72013	0.234808	-0.647871	1.65315	2.3638	4.53286	1.84885	-1.49716	-0.868354
TEKT5	-0.848813	0.509654	-0.657636	3.59306	-0.0112724	0.492098	0.693247	-0.15027	0.627844	-0.482221	-0.113393	-1.4719	-0.576668	-0.406168	0.747529	0.550558	-0.67591	-0.645946	0.528703	-0.860345	-0.84994	-0.994653	0.489072	1.91094	-0.806149	-0.0472798	-0.799913	0.0112724	0.944319	0.736259	-1.51472	2.36586	-1.24953	0.234001	1.36171	-0.821524	-0.57426	-0.0309248	1.38375	0.241802	1.28315	1.60534	2.03793	-1.16624	2.40939	1.18075
TDH	-0.544239	0.982781	1.4628	-0.594371	0.501282	2.88816	-0.17243	-0.512564	0.0966053	-0.0677557	-0.150083	0.213291	-0.581636	-0.26064	0.359811	-0.57031	-0.395772	4.57646	3.47212	-0.534455	-0.680986	0.459987	2.49934	1.8684	1.29298	0.0677547	1.19088	-0.621565	1.94634	2.96234	-0.576487	-0.52437	-0.555907	-0.609844	-0.47257	-0.567962	0.299675	-0.552979	-0.242244	-0.58791	1.26702	-0.47293	1.49963	1.83892	1.53629	1.83144
LINC00615	1.39387	1.12945	-0.153877	-0.0638666	-0.080298	0.0638666	-1.30077	-0.182945	0.958367	-2.11739	0.350662	0.246313	-1.52227	0.248205	-1.47503	-1.42949	-0.42704	0.202691	-0.410134	1.58143	1.43994	1.72445	1.45712	-0.356635	2.17583	-0.467757	0.333487	-0.629844	2.12962	0.275272	1.64049	-1.03232	-2.70383	0.594335	0.547918	-1.25427	0.457509	-1.11248	-0.233928	-0.996903	-0.716136	-1.43066	2.1376	0.432624	0.508379	-0.313261
SERPINA9	-0.697474	-0.206357	-1.2417	1.15515	-0.493829	0.804291	0.216169	1.31833	0.0160856	-0.218609	-2.02853	0.756408	-1.20438	0.591888	0.713078	-0.00284052	1.64227	0.0225973	1.1068	0.769299	0.947986	1.45693	-0.293442	-0.32968	-0.536812	-0.52811	-0.404246	-0.405914	0.993698	0.418278	-2.38074	-0.291372	-0.0680556	-0.426362	-0.0934491	-0.217798	1.04341	0.00284052	1.9698	0.775791	-0.748099	1.06959	1.24998	1.39856	-0.213791	-0.643963
MRGPRX4	0.106946	-1.15242	1.14064	0.42627	0.489311	0.933151	-1.0364	-0.675323	1.64565	-1.93179	1.56344	0.0870223	1.14214	-0.186381	0.813385	0.590625	-0.804204	-2.61589	-1.87345	1.38533	-0.275222	-0.286473	-1.98311	-2.55968	0.468092	-3.04944	-0.0536995	-0.147777	-0.459678	1.20146	-0.402093	-2.20224	0.200623	0.100826	-1.65386	-0.464843	0.499474	0.256927	1.15202	0.620914	0.0536995	-0.108991	-1.0314	-2.166	0.535408	0.820355
A2ML1	0.477526	0.375742	-1.48899	0.963242	-2.84517	-0.277033	0.891651	0.47508	1.73042	0.901369	0.892437	0.0213747	2.02749	-1.63383	-0.895954	-2.16483	-1.5743	0.488655	-1.90091	-0.0213747	1.5047	-0.959204	-1.11595	1.34958	1.65345	-0.954026	1.46046	-1.85221	0.283745	-0.0614076	-2.08895	1.2398	1.01442	-1.19301	1.32435	-1.48945	-0.235785	0.888681	0.638925	-0.803738	0.5836	0.997004	-0.266605	-0.522376	-0.217978	-0.923371
CPO	-4.07623	0.53521	-0.755026	-0.319955	-0.0768681	-0.302612	-0.0236292	-2.05434	0.249923	0.610116	0.130291	-2.06956	-0.146788	-0.0794854	0.956225	0.970724	0.292486	-1.21615	-3.03338	-0.865033	1.07856	-0.36437	0.746935	1.5042	0.611544	-0.0958567	0.00489092	-0.331761	0.845747	0.397573	-0.400506	0.152749	0.665999	-2.55835	0.341379	-1.48135	0.0858417	0.259022	0.436137	1.14846	-0.00489044	1.04157	0.66631	-0.411771	-1.41814	-0.908976
HOXC12	-0.722794	0.828455	0.888052	-0.111917	-1.03541	0.320754	0.881474	0.0730479	-0.0046041	0.45301	0.473604	-0.408626	-0.0611308	-2.25075	0.0272286	0.085635	-0.182211	-1.001	0.0046041	0.189664	0.896956	-0.282931	-0.0431659	0.377263	0.756187	0.566271	0.686758	-0.0963519	1.78032	-1.09526	-1.90784	-0.27955	0.485464	-0.303265	-1.714	-1.22077	1.22335	-1.34324	0.0615141	0.0345027	-0.343117	-1.26984	-2.40459	0.508383	0.65023	-1.18914
FERD3L	-0.481506	0.253292	-0.750534	0.116479	0.382745	0.0906076	-0.573912	0.567992	-0.830574	-0.140629	-1.09035	0.110005	-0.490706	-1.29482	-0.198802	0.374631	0.344275	0.78323	-0.858342	0.193065	-0.135452	0.936238	-0.334709	-0.395741	0.661848	-0.174617	0.223563	-0.345311	-0.269699	-0.407249	-0.461034	-0.507646	-0.127933	-0.0410809	0.348634	0.81598	0.183629	0.147034	0.162066	0.231446	0.0410805	-0.879705	0.312464	-0.489895	0.788884	0.220804
LINC00314	1.36506	0.042201	-0.215868	-1.06441	-1.50675	-1.35937	-1.39172	2.28425	2.81386	-0.927585	-1.272	0.553399	-2.24834	1.02079	0.889714	1.41819	1.72216	-2.47207	1.60379	1.0397	-2.56211	-0.805222	-2.54482	-2.41454	2.38184	-2.49341	0.846465	0.643418	1.56302	-1.93424	1.69831	-2.13851	0.651095	-0.194419	2.14623	1.51723	-2.15148	0.244428	-2.38985	-0.653621	1.58108	-1.60684	-0.381489	-0.0422015	0.261466	0.113017
NLRP14	-2.2426	-2.45282	-1.66207	0.881454	-1.34514	-3.10754	-1.14476	-0.900815	-1.58875	-0.586966	-1.27588	-2.77789	0.896345	0.484766	0.553048	0.918847	-1.66237	-1.20789	-2.76965	0.662741	0.540677	0.963755	-1.67308	0.357753	-1.74013	0.360245	-0.845225	-0.2738	0.377077	0.697599	0.797909	0.0434651	-0.0434651	-0.938829	0.513509	-1.62983	0.961568	1.28799	-2.0159	0.510158	1.18801	1.42457	-2.00486	1.71277	1.5753	0.764381
DGKB	-0.162437	2.20759	2.75094	-0.243261	0.241951	1.87394	1.99816	-1.16447	2.73178	-1.68519	-1.33745	-0.218461	2.49279	1.5988	-0.606977	-0.259346	-1.80576	-1.69777	-0.32896	0.567991	0.0510416	1.8833	0.42005	-1.077	0.585147	-1.67475	-2.07218	-0.0510416	1.98241	0.58723	-1.18859	-0.935693	-1.0473	0.883455	0.574323	-1.18029	-1.2855	0.22085	-0.751944	-0.836346	2.16947	-0.26352	2.60254	1.07366	0.750364	1.54664
NLRP13	-0.391787	-0.0717864	0.175108	0.585826	-0.111885	-0.429509	-0.0624824	0.930053	1.16595	0.0118456	-0.116918	-0.433308	2.77778	0.863794	2.0515	-0.142988	-0.821882	-0.781808	2.18765	-0.339909	-0.101236	-0.810476	0.216138	-0.218736	-0.0118456	1.58986	0.616247	1.65174	0.967007	-0.264763	-0.349821	0.913816	-1.50726	0.970477	0.929155	-0.945758	-0.257991	0.900273	-0.169634	2.16471	0.974792	2.56749	-0.453962	2.46073	1.3359	-0.569345
NLRP8	-1.89755	0.00164604	-0.937134	-0.545036	-0.525177	-0.524924	0.0651889	0.0403876	2.16099	0.110927	-0.337684	-2.0302	-0.00164557	0.517172	2.53713	1.75636	-0.530344	-0.328811	0.304019	2.60441	-1.12427	2.50124	-0.289626	0.334999	-1.2729	-0.804209	-0.795811	0.822299	-0.0020318	0.546495	0.355557	-0.409813	1.48679	-0.281305	1.54195	1.92053	0.33339	1.41128	-0.323566	0.128729	-0.252028	-1.21431	-0.384836	0.479478	-0.991877	1.71898
NLRP9	-0.391446	0.0375197	-0.931975	0.221544	-2.5168	-0.0878503	0.366088	0.335705	-0.0141132	0.000744	0.0795286	0.373186	-1.54301	0.0130703	1.5426	-0.553146	1.05055	0.0222371	-0.238194	0.459411	-0.307719	0.0729477	-0.002918	-0.116731	-0.475804	-0.000744	-0.583315	-2.89694	-0.700688	0.314852	-0.106381	0.474704	0.832437	-0.636557	-0.495122	0.136711	0.775611	-0.0642984	0.781043	0.41843	0.164978	0.43363	-0.757026	-1.85144	0.0389762	-1.90822
TAF5	-0.25548	-0.0519242	-0.309042	0.0921912	0.390699	0.124528	-0.0934234	-0.0705943	-0.50642	1.30083	0.729048	0.620289	-0.251622	1.08254	0.0213323	-0.931323	0.234314	-0.378442	0.181063	0.363142	0.0639806	-0.0773282	-0.0129733	-0.128839	0.0497642	0.560096	0.16352	-0.361284	0.585745	-0.45204	-0.444986	-0.126225	-0.0918822	0.487493	-0.215298	0.104114	0.556407	0.849894	0.556051	0.0129733	-0.212045	0.562137	-0.154598	-0.267092	-0.300267	-0.408766
TAS1R2	-1.76912	1.34988	0.530376	1.57657	-1.89743	0.5772	1.80715	-2.31627	0.416229	-0.683976	-3.00588	1.50369	-2.07168	-1.47798	-0.432906	1.47666	-1.57214	0.551948	-1.67255	-1.19987	-0.528834	-0.378956	-0.41569	-1.42129	0.676689	1.62066	-0.999682	0.380843	-1.64776	1.98705	1.35635	-2.8759	-1.05707	0.907763	-1.2429	-0.995348	1.28712	0.8496	1.68681	1.80594	1.05489	-2.41024	1.73635	0.901201	0.378956	-1.72659
PCSK6	-0.134379	0.406511	0.257733	-1.60294	1.54813	-0.576471	-1.1356	0.786079	-1.41732	1.6214	1.6753	0.563639	-0.0339255	-0.527676	-0.0943608	-0.0228887	2.29932	-1.75998	0.394889	-0.68252	-0.190553	-1.0284	0.221995	0.721452	1.05326	0.756992	0.559876	2.4077	0.0228887	2.49981	-0.717973	-0.253499	-1.03451	-1.329	1.62627	1.99923	-1.62184	-1.20841	-0.346967	2.63087	-1.22077	-0.282926	1.14556	1.73222	0.441918	-0.0350347
ZNF341	1.25192	-1.25882	-0.925945	-0.172776	1.01064	0.333798	-0.446349	0.812485	-1.02256	-0.219321	0.340766	0.516368	-1.43719	1.15688	0.0219438	-1.82159	1.48116	0.475251	1.64014	-0.46348	-1.40729	0.887596	-1.05043	1.94033	1.72121	0.664927	-0.999158	-0.757339	0.771495	-0.0219438	-0.210597	1.3891	-1.20641	-1.66359	0.777243	1.02384	0.202777	-1.08374	1.90334	0.347007	1.45433	-0.623985	-0.0422783	-0.320731	-0.523418	-1.07315
JPH1	-0.128529	0.154208	-0.908251	-0.381264	-0.710527	-0.0117965	0.228919	0.283397	-0.730946	0.496385	0.0118995	-1.02745	-0.508145	0.168656	0.045989	-0.703692	0.292668	-0.391319	-0.121925	0.0915451	-0.78324	-0.365884	-0.238486	0.451979	-0.393638	-0.176919	-0.991214	0.235171	-0.374348	1.20546	0.0117965	0.972866	-0.480655	0.356473	0.690374	-0.0936222	1.82655	0.552878	0.917755	0.700868	-0.398998	0.299333	0.291425	-0.325727	-0.170942	1.15365
NLRP10	0.402396	0.096808	0.383011	-1.02709	0.658713	-1.07458	-0.70919	-1.09502	-0.0107741	-0.753026	-0.244527	0.0414796	0.370295	-0.0184669	1.07576	0.309211	0.0107741	0.682951	0.143888	-0.618236	0.489309	-2.12702	-0.382611	-1.67918	-0.822809	0.399891	-0.72755	-0.286095	-3.17753	0.47116	0.678434	0.129343	-0.933955	-0.394888	-0.103118	0.240068	-0.945287	-0.959544	-1.29759	0.129776	-0.550695	0.425265	0.307795	0.981192	0.36775	1.26324
KRT73	-0.21566	2.01701	0.312956	-0.805796	1.66089	0.568628	-0.608724	-0.626906	1.1852	-0.490568	-1.41995	-0.189135	-0.341716	-1.27996	-0.687507	-0.521905	0.00410032	-1.31261	-0.60252	1.46611	0.558445	0.0231938	-0.0323691	0.656887	0.997954	2.06327	1.50667	0.0437822	-0.00410032	-0.664549	1.78776	-0.596609	-1.53452	0.517739	-0.0691295	-1.58305	0.77695	3.20353	-1.58631	0.280764	-0.00598001	-0.162952	0.835413	0.548049	0.0938468	0.6351
COX1	0.0153904	0.0283966	0.165205	0.228153	-0.207665	-0.134388	0.266259	0.160916	0.82168	-0.198145	-0.183327	-0.0785665	0.329742	0.0375376	0.648499	0.201658	0.209335	0.167898	0.0780916	0.189106	0.0427485	-0.18174	-0.117017	0.12991	0.0544081	-0.0103369	-0.108778	-0.0821619	0.261666	-0.171078	0.000304	0.0248232	-0.432445	-0.160794	-0.0873194	-0.0261993	-0.0361357	0.00321865	-0.000304	0.283059	-0.0622034	-0.195921	-0.0420933	-0.0857387	-0.244298	-0.0833039
KRT74	2.18235	0.662232	-0.345422	-0.721967	0.296824	-1.15562	2.16723	-1.0232	2.8451	-1.75333	1.62136	0.118902	1.8158	1.36966	0.372808	2.00494	1.6362	1.80188	0.699554	-1.79684	2.11034	0.538032	1.14885	-0.380398	1.12285	0.931861	-2.38632	-0.829958	1.22292	-0.621436	-0.713421	-1.05039	-1.44583	-2.19566	-1.1554	-1.56057	-1.4335	-0.251257	-0.406223	-1.7874	-0.396982	-1.38942	-0.118903	1.01323	0.144451	2.61918
LMX1A	-3.29588	-1.30545	1.03401	1.1358	-2.35869	-3.6179	-1.42401	-0.414462	-1.81696	1.20422	-3.40802	-0.79411	1.35158	-1.84526	-0.649557	1.15857	0.538738	0.521724	0.491919	0.0537953	1.78699	-1.08061	-3.22292	-1.68399	0.778127	0.252307	0.912099	-2.25644	0.544538	-3.6121	1.15184	-2.60568	1.28382	-0.696612	0.47879	0.591648	0.277888	-3.78987	0.999441	1.47878	1.31474	-1.32623	-2.40512	0.61086	-1.87512	-0.0537958
CCDC125	-0.230097	0.0450468	0.228742	0.391623	-0.767888	-0.0515418	0.740534	0.621761	-0.164135	0.257868	0.0171828	-0.731972	0.488383	0.292652	-0.58242	-0.0547814	0.158284	-0.0171828	-0.175856	-0.294958	-1.43468	0.351702	-0.460236	0.95014	-0.58714	-0.0884843	0.563955	-0.576566	-0.0288901	-0.333779	0.304463	0.308856	-0.652679	-0.0652995	0.332889	-0.438702	0.188585	0.444017	0.488641	0.0510397	-0.222594	-0.72775	0.322038	0.149502	-0.120683	0.421346
GPR101	-1.1036	-0.504352	-0.143792	0.435525	-0.376309	-1.21332	1.84819	-0.208135	2.17216	-0.0674992	-1.28487	-1.22308	-0.695238	-0.184588	0.208149	0.348096	-0.283224	2.02122	1.82343	-1.04558	-0.707261	-0.212205	1.79729	2.3678	1.19975	0.0104914	1.44408	-0.847862	-0.0698738	0.105048	-0.421071	0.42921	1.45848	-0.417958	-0.556365	-0.0104914	2.55916	0.510302	0.0509353	0.0343995	0.904622	-0.51656	0.0641665	1.15428	-0.229553	2.64744
VN1R2	0.52192	1.72542	1.62284	-0.299012	-0.160938	-1.37788	0.28604	-1.35396	3.30675	0.137771	-2.12369	-1.2891	0.60536	1.08676	1.62358	-0.590371	2.29319	1.94761	-0.712682	0.289684	-2.22687	0.768384	-0.630257	-0.90992	-2.03834	-1.23335	-1.2166	0.0189557	1.69332	2.11586	2.04458	-0.0189552	-1.37548	-1.18659	-0.474288	-0.451356	1.67452	-1.286	0.45735	2.04475	0.528362	-0.466033	2.03795	-0.991833	1.83113	-0.193966
VN1R5	-0.794343	-0.176416	-0.0866408	-0.113083	-1.96307	0.395081	-0.00364208	-0.492919	3.09376	-0.362208	-0.101418	-0.064662	-0.126967	-0.760968	0.156013	-0.246935	-0.545515	2.34389	0.214569	2.31624	0.00364161	-0.149921	2.0091	1.09955	2.88658	-0.124935	2.29518	-0.709268	2.2146	1.70891	1.6831	-1.32669	2.01325	2.54734	-0.166445	-0.504854	0.339369	2.17634	-0.895088	0.0961213	-0.966562	1.78403	2.73147	-0.24299	0.595836	2.3018
ND2	0.0591784	0.138952	-0.809321	0.295501	-0.11052	-0.0938768	0.283619	0.288925	0.810397	-0.20389	-0.163582	-0.0192642	0.30345	0.0338106	0.61798	0.242824	0.248872	0.245747	0.0119095	-0.527358	0.0205526	-0.124877	-0.138017	0.137758	0.110668	-0.149365	-0.0845919	-0.0179729	0.34326	-0.103988	-0.0552073	0.0472851	-0.31113	-0.123322	-0.735589	-0.0260401	0.0106516	0.0443125	0.0142059	0.3199	-0.00218201	-0.85783	-0.0993929	-0.0633168	-0.198019	0.00218153
TAAR8	-1.72815	1.67633	0.867319	1.61741	0.37288	0.137758	1.7333	1.39252	0.247275	-1.30532	0.101959	-0.24141	-1.21982	-0.974344	0.166434	-0.620028	-1.89814	-1.1183	0.94217	-0.101959	1.25771	1.172	0.284887	-0.947349	-2.46422	1.47103	-1.16647	-1.51878	-0.792026	-3.85359	1.3605	-0.602789	1.01608	0.488031	0.731594	-0.559213	-1.85734	-0.924888	-1.05475	-1.70164	0.324515	-1.5332	-1.54129	0.135762	1.60135	0.602077
TAS2R39	-0.353673	0.980423	0.21795	-0.269777	-2.15743	0.505541	0.394189	0.361236	0.844486	-0.804541	-0.74859	-1.76284	0.186932	0.00754023	-1.28329	0.169652	0.576595	-0.173635	-1.58101	0.96062	0.832174	-0.286498	0.279093	0.205197	0.262133	-3.61407	0.865032	-2.21416	0.00939226	-3.7381	1.04293	1.04843	-1.82608	0.779201	-0.00754023	0.044734	-0.70974	0.0377193	-0.520803	-0.224026	0.209403	-1.68552	-0.745301	-1.01935	-0.74249	-1.94764
TAS2R38	-2.08854	1.75427	0.342828	-1.12932	-2.66985	0.839965	-1.3984	0.801686	0.791094	-1.9269	0.129477	0.445928	-1.96388	-2.11131	0.764433	0.696839	0.67716	-2.0108	-0.88663	-1.45807	-1.69212	-0.419505	1.38571	-1.23289	-1.26959	-1.52907	-1.86378	1.16167	-0.0407391	1.6855	0.362572	-2.0779	0.618355	0.86306	0.0407391	1.7161	1.78468	0.60562	-1.28842	-1.87467	1.02228	1.79462	-0.994701	1.56846	-1.30719	-0.205952
TAS2R40	-1.0652	-0.396229	0.951941	0.553177	-0.199519	-0.332286	0.239066	0.430322	1.01398	-0.9054	-1.77522	-2.80303	-0.262838	0.608571	-0.450671	0.271747	0.380127	-0.142341	-0.879166	-0.635406	-4.3734	0.158077	-1.79534	-0.917203	0.738841	0.434089	-1.9984	0.459623	0.555712	0.721301	0.749821	-0.638583	-3.53501	-1.1782	0.142341	-0.643815	-2.47068	-2.02884	0.397987	0.15751	-1.54204	0.213406	0.216535	1.47105	0.20506	1.02513
TAS2R41	-1.13059	0.277089	-1.24685	2.86024	1.26114	0.82324	1.50542	1.8515	-0.935439	-0.74646	-0.134176	1.34724	2.34071	-0.635833	1.46768	0.019249	0.00488472	1.29892	-0.554717	-0.587834	1.504	-1.36642	-0.339409	-0.467173	0.373292	-1.96618	0.849409	-0.705496	-0.277251	-1.83033	1.67868	-1.94028	1.02164	1.27506	-1.07088	-0.356071	-1.84553	1.84858	2.42696	-0.963881	-1.39506	-2.26437	0.0676842	-0.0048852	1.40679	1.30867
TMEM171	-0.366631	-1.70018	0.857514	0.799661	-3.44137	-0.486003	0.362602	-0.331741	0.778395	-2.41675	-1.92741	-0.325784	0.215979	0.707145	-0.519793	1.59497	0.271701	-0.222261	0.668143	0.119294	-1.38601	0.603364	-1.24381	1.78308	-0.651748	-0.256629	1.24223	-1.35841	-0.0856817	-0.524879	1.54855	0.385954	0.571894	0.736579	-0.291424	0.851803	-1.81744	0.355118	-0.37836	0.100605	1.63061	-0.022373	-2.04239	-0.377274	0.574453	0.022373
VN1R4	0.0185933	0.139661	0.216498	-0.0185933	1.61929	1.01006	0.677272	-1.00086	1.40475	-1.26854	-0.304001	-1.1394	-0.286376	-0.445413	0.741464	-0.452774	-0.683063	1.19358	-1.6306	-0.0311017	-0.43781	-0.230413	0.870628	1.25628	2.00825	0.0696797	-0.105912	-1.47713	-2.51964	-0.692685	0.106628	1.24625	1.55762	-1.86889	-0.282804	-0.320102	-0.600138	0.943136	1.31995	-1.85455	1.80655	0.562803	-1.50382	0.666928	0.235705	1.72714
TAS2R50	-0.0221872	-0.556685	0.308842	-2.84024	0.382707	-0.114721	-1.23695	0.297567	-0.056222	0.344874	0.324601	0.43473	-2.54552	-0.936416	-0.602173	-4.66528	0.412318	-0.832924	-0.0655651	0.116985	0.438598	0.510652	0.000763	0.649053	-0.29702	-2.03405	-0.000763	0.550006	-1.62201	-0.114318	-0.633684	-2.44732	-1.33549	-0.239265	0.410301	0.390137	0.61275	-0.0111094	0.646421	0.0634155	-1.4318	0.0150971	0.126756	1.04629	0.571588	0.0909882
MACROD2	-1.23079	-0.372221	0.301952	0.677732	-0.360696	-3.1261	-0.17455	-1.21569	1.44736	-0.489914	-3.0012	-2.93563	0.601987	0.638629	0.647876	-0.126279	0.497355	-0.43398	0.22275	0.241616	0.340603	0.503608	0.414262	-0.197937	0.502958	-0.344393	-0.405158	0.354794	0.174155	-0.116124	0.0487504	-0.239243	-0.351652	-0.136717	0.947903	-0.0200319	0.277058	-0.519479	-1.0818	-0.341238	0.514085	0.0200319	-0.479102	0.620379	1.06704	0.441543
DDAH1	-0.0674429	-0.532742	0.402964	-2.99117	-1.58012	-0.170605	0.255084	0.556983	-0.415255	-0.524345	0.490525	-0.730019	-2.79257	-0.51113	-0.210114	-0.848753	0.189208	-0.379814	-0.818222	-0.384892	-1.33682	-0.950377	-1.3582	1.01786	-1.10963	-1.86078	-1.82439	-0.0868917	0.00461006	1.22669	1.5381	1.26788	0.711528	1.33983	1.27253	0.914288	1.29811	1.65949	1.51318	1.19035	1.56057	0.65029	0.0430827	0.102752	-0.00461006	0.863187
ATP6	0.188533	0.196115	0.133732	0.30259	-0.0712857	0.0146213	-0.064918	0.18413	0.756619	-0.194633	-0.422831	0.0654082	0.200305	-0.0442119	0.54252	0.461507	-0.0603843	-0.012094	-0.0113711	0.0731301	0.0261426	-0.62034	-0.378926	0.0428367	-0.0627227	-0.415384	-0.0694184	-0.190987	0.296924	-0.182297	-0.105462	0.00926352	-0.316825	-0.0842795	-0.28621	-0.187127	-0.00298834	0.481575	-0.169822	0.0918298	-0.144207	0.00298834	0.177124	0.282549	0.127597	0.23576
COX2	0.0596704	0.14971	0.178128	0.285913	-0.125839	-0.134625	0.26472	0.23811	0.802143	-0.127962	-0.142163	-0.0317278	0.273771	0.0821562	0.628119	0.247999	0.234524	0.258692	0.108372	0.240705	0.0457621	-0.126085	-0.0440912	0.177966	0.148052	-0.110945	-0.0719357	-0.0369053	0.312036	-0.0831919	0.0900583	0.00918579	-0.326796	-0.123494	-0.0179615	-0.0672932	-0.0833702	0.0432129	-0.00918579	0.277337	-0.0724878	-0.138657	-0.0305128	-0.0117469	-0.089231	-0.0547376
EFNA2	1.03337	1.78583	2.60141	2.74461	-1.12536	-0.387303	0.0338922	-0.968488	-0.921957	0.305581	0.567512	1.07354	-0.882781	2.28192	2.19453	2.30705	1.29947	0.719403	-0.434847	-1.07669	0.759561	-0.454178	-1.06604	0.277874	-0.560717	0.312032	-1.56963	0.749971	1.51039	-0.680505	2.00248	-1.11087	-1.83389	-0.884998	-0.665172	-1.99611	-3.22798	-1.48387	-0.262843	-0.952025	1.95504	1.94531	-0.446876	-0.0338922	1.95107	2.32735
IFNE	-1.33753	-1.63832	0.075099	-2.44713	1.1785	-1.18949	0.624125	0.693073	1.11462	-0.685588	-2.34037	-0.208965	0.14837	0.294951	-2.24407	-0.156398	0.260118	0.420097	0.457854	0.325848	0.345525	-0.162554	0.0217414	-0.25623	0.927594	-2.87692	-4.47436	0.288456	1.23918	-1.11592	-0.156562	-1.64516	-0.977436	-3.45339	-0.0217409	0.0869622	0.697861	-1.40993	0.725561	1.4461	-0.922431	-3.32786	-2.73069	1.24664	1.4562	0.63446
ND6	-0.342596	0.744609	0.68483	-1.01734	-0.403875	-0.452428	-0.203613	0.0745659	0.538421	-0.17683	0.294209	1.27437	0.619191	0.0710487	-0.444798	0.22396	0.390659	-0.00116348	-0.0687628	0.387813	0.266499	-0.174376	0.0617638	-0.59761	-0.339968	0.010746	-0.490035	1.18246	-0.165157	-0.124418	-0.762352	-1.6405	-0.264495	-0.487763	-1.43194	-0.624471	-0.0536957	0.406954	0.808203	-0.555551	0.0871668	1.79255	2.05187	0.00116348	0.641847	0.821429
SREK1IP1	-0.221992	0.305735	0.493496	-0.0808129	-0.309343	0.312952	0.353645	0.196271	-0.672246	0.592656	-0.312048	-0.244311	-0.0446773	-0.0963073	-0.124959	-0.809887	0.341588	-0.131949	-0.439235	-0.0790534	-0.914338	0.0973487	-0.515514	0.298179	0.443415	-0.360233	0.0190158	0.0271897	-0.0923009	0.411242	0.139784	-0.180239	0.103396	-0.206283	-0.235837	0.154109	-0.0190158	0.0797763	0.725393	-0.273117	-0.123048	0.089232	0.27102	0.713403	0.110903	0.0696888
THRSP	-1.69282	0.586587	0.723055	0.024826	-0.570451	-0.0609274	-1.65123	-0.431736	1.25655	-0.769348	-0.0694475	-0.024826	0.708367	-0.335227	-1.04558	-1.87817	0.455428	0.360473	-0.83547	0.109248	-1.4004	-1.71285	0.620569	-0.946318	-0.0545406	0.720587	0.767702	-0.510297	-1.97345	0.529839	0.693947	0.763406	0.230346	-2.01748	-0.887565	-1.88758	0.561264	0.816123	0.0644469	-0.977898	-2.06369	1.31655	0.972405	0.943765	1.2728	0.848289
FBXL19-AS1	0.0408709	1.26613	-0.747124	0.517487	0.661017	0.992551	0.270028	0.983831	0.353428	-1.13908	-0.439353	0.598553	1.33557	0.605327	1.71931	-0.000472	-0.252343	-0.753854	-0.965306	-0.504432	0.719069	0.970103	0.970833	-0.00214696	0.597	0.799434	-1.04712	-0.672714	-1.19502	-0.495001	0.201473	-0.240554	-0.578885	-1.03919	-0.276019	0.763625	0.000472	-0.747291	0.49557	-1.44986	-0.158596	-1.38919	-0.0389967	1.25189	0.419517	-0.189792
POLE4	0.501252	1.73493	0.0965226	-0.0770547	-0.00889182	-0.0919359	0.906933	-0.0131509	0.822468	0.0863173	-0.353363	0.243694	-0.245478	0.104022	-0.391946	0.371504	0.955697	-1.15819	0.299331	0.647431	0.513807	-0.295994	-0.705358	-0.179399	-0.142243	0.0306504	-0.773186	0.127398	-0.318343	-0.778326	-0.105009	0.293139	-0.0778186	0.129311	-0.40508	-0.133462	-0.150246	-1.22631	0.14485	0.280258	-0.273437	0.597876	0.708028	0.00889182	0.741335	-0.0595825
BCRP3	0.876884	0.716214	0.490877	1.47205	1.75643	1.33255	1.59173	0.0799036	1.69697	-0.817957	0.609403	1.2756	-1.49421	-0.369611	0.508757	-0.102596	-0.245968	-0.0652218	-0.0455217	0.201698	-1.39523	0.0496659	-1.96071	-0.149231	-0.0875249	-0.399248	-0.566974	0.435461	0.691788	0.662982	-1.5518	0.561315	-2.2069	-0.07518	-2.0401	1.64916	-1.56681	-2.0155	-0.681706	0.0455217	-1.92185	-0.158763	-0.160217	0.253175	0.983556	0.969125
TAL2	1.30898	0.516683	3.03024	0.604066	2.02017	-1.08415	-0.394116	-1.55609	4.67615	-0.336172	-0.467393	-1.59332	0.20955	-0.0279136	-0.393791	0.171535	-0.89324	-0.219736	-0.292115	-0.881923	2.46221	0.794057	0.393515	-1.11905	-0.682188	-0.321562	0.507172	-0.838579	-0.651974	1.9177	1.87345	-0.573286	-1.45142	-0.0718122	2.16845	0.386663	2.22364	1.97518	0.406646	-0.772914	0.0279136	-0.277174	1.80814	1.37746	0.212617	-0.592989
SYCP3	-1.51855	-0.209991	0.0126309	0.863618	-0.997931	0.300522	-0.321122	-0.572068	0.202542	-0.706557	-0.336969	-1.56364	0.209731	-0.16597	0.71636	-0.140179	-0.21513	0.399683	0.324256	-0.128124	0.0835338	0.259028	-0.0827889	-0.21836	0.68707	0.278397	0.335633	0.533617	-0.850842	-0.669248	-0.0126309	0.131474	-0.387628	0.194052	-2.08695	0.768343	-0.192225	-0.519238	0.64871	0.379119	-0.149418	0.342785	-1.79104	0.0702336	1.00696	1.02724
TMIE	0.752865	0.202562	-0.565684	-0.980075	-0.300329	-0.761654	1.77027	-1.45653	1.01574	-0.262769	-0.728767	0.6912	0.672861	0.455523	-0.230427	-1.28762	-0.084343	-0.388403	-0.413939	0.393089	-0.228024	0.639965	-0.0237942	0.579484	2.8616	-1.79214	2.31879	-0.75079	0.0237942	-0.338424	-1.57309	0.691693	-0.105442	0.64518	1.31972	-0.414138	-0.411635	1.15589	2.02821	0.483324	0.236262	-0.130083	-0.963777	1.15063	0.171497	0.216964
MUCL1	0.518648	-0.905704	0.221018	-0.406351	-0.14242	-0.0430722	-3.81848	-4.22361	2.42728	-0.971456	0.133288	2.17719	-1.10338	0.722897	0.472691	-0.631714	-0.971469	0.277675	-3.39693	-3.81451	-0.0931072	0.775675	1.25161	0.151598	0.741753	-1.18751	-1.31619	-0.265247	-0.182603	-0.139993	-1.27032	-1.37486	0.135756	0.195187	0.462774	-0.646729	1.68782	0.332699	-3.19996	1.56059	0.0628834	0.40328	2.84655	2.52429	0.043072	-0.615327
ATL2	0.0179458	0.621996	0.301017	-0.685969	0.00898504	-0.284125	0.475961	-0.144879	-0.124488	0.166387	-0.0435843	0.0800862	-0.447895	-0.168317	-0.118564	-0.00898504	0.776693	-0.432724	-0.0432506	-0.106353	0.0866151	-0.457562	0.351407	0.0660749	0.135639	0.294427	-0.49838	-0.0631413	0.309529	-0.384768	-0.0339494	-0.346171	-0.213971	-0.291156	-0.492528	-0.274319	0.166299	0.261844	0.290499	0.149159	0.164928	0.526127	-0.338214	0.236097	0.0867052	0.322554
ABCA13	-2.1493	1.43296	1.22085	0.601311	-2.73113	-0.524824	-0.00328827	0.672175	1.79743	1.0115	-1.50731	-2.75215	2.89781	-0.0960841	-1.96473	2.72849	-2.39256	0.589673	-2.38371	1.67575	2.54211	3.86966	0.756133	-1.24995	0.799269	1.54969	-0.619978	-2.16627	2.17308	-0.867909	1.41714	-3.10437	2.18971	-2.54501	0.00328827	0.682407	-1.6166	-2.73321	-3.08873	-1.7895	1.51871	-2.70629	-1.08037	0.232802	-1.04371	1.29077
LINC00189	-2.39552	0.619284	-2.87485	-2.22024	0.227334	0.285367	1.20588	1.38327	2.25911	-1.76606	-0.0407925	-2.82334	0.768471	1.20039	-1.70467	-1.92759	-0.820305	0.12056	-0.233427	-0.133977	0.360239	1.54241	1.06384	-2.17682	0.851959	-0.180084	-1.31273	-1.91086	-2.07456	0.974391	-0.0406561	-4.59203	-2.3563	0.114683	-2.88416	-0.616067	-3.12787	0.0406561	0.0617857	-0.130732	0.216409	0.53487	0.485755	0.395381	0.154244	0.192886
ZNF354B	-0.211399	0.47237	0.277179	-0.0501168	-0.174768	-0.371291	0.295559	0.350755	-0.104748	0.255921	0.433795	0.098264	-0.307954	-0.238539	0.126715	-0.251692	-0.279141	0.124152	0.731814	-0.11317	0.692355	0.394295	0.848038	0.456019	0.0633662	-0.481002	-0.0812614	0.0318649	-0.313328	-0.194931	-0.300753	-0.458217	0.088433	-0.440367	0.0964053	-0.163728	-0.165399	0.332237	0.229407	-0.415294	-0.0318649	0.179513	-0.189249	-0.0958135	0.171644	0.594151
LINC01198	0.242558	0.519302	-2.55979	0.0385876	-0.098063	-3.03648	-0.0521488	-1.61327	0.763676	-2.35589	-3.77483	1.32727	0.342782	0.643228	0.863043	1.52932	-1.94107	-0.997422	-2.41059	0.394815	0.849129	-0.0385876	-2.35888	0.464798	0.0645623	-1.7673	-2.53998	-0.738021	-1.14206	-1.06149	0.488532	0.272157	0.419664	0.232216	0.169115	1.04528	-4.18235	-2.0065	-0.784227	0.292924	0.4102	-1.81022	1.09265	-1.532	0.274892	-1.8041
TRIM42	-0.793799	0.25151	-0.379496	-0.136528	-1.64466	1.53666	-0.243829	-1.50484	-0.275322	1.4026	0.237374	2.09375	-0.557212	-0.452613	1.20184	-0.07375	1.03516	0.10869	-0.502665	0.674843	-1.26143	1.87353	-0.457827	0.07375	0.385601	-0.22131	0.419128	-0.814563	-1.15183	0.694887	1.31091	-1.39158	0.444647	-1.07245	-0.103017	-0.278951	0.615157	-0.170074	0.282896	-0.441177	-0.166227	0.208096	0.506722	1.01693	1.56591	1.52762
FSIP1	-0.292765	-0.215895	0.879055	0.297349	-1.23576	0.465905	-3.27454	-1.19859	1.27291	-2.65924	-0.810287	0.492563	-0.0088315	-0.263471	0.897787	-0.74431	-4.63011	-1.49122	-0.117965	1.95433	-2.86031	2.34564	-0.256609	-0.34689	0.0773912	0.326136	-0.325447	0.191068	2.00304	-0.98749	1.10071	0.343531	0.505527	-0.088706	0.493317	0.00883102	-3.53107	0.129889	-0.8776	-3.10549	0.882379	0.0135283	-2.87208	1.02386	0.592121	0.613521
CABCOCO1	-0.208208	0.329036	-0.83021	2.35353	1.98663	3.38329	0.336753	0.0735006	-0.504162	0.998399	-0.252916	2.29142	3.21098	-0.853972	2.27439	-0.142	-1.27326	0.26294	-0.585243	-0.401711	0.465828	-0.764154	0.574766	0.43791	3.7486	-0.853887	-1.21782	-0.526545	-0.652433	-1.32044	-0.379516	-1.25741	-0.0735011	0.113515	-0.811476	0.91965	-0.315512	2.13787	-0.736053	-0.136179	-0.705672	0.468985	0.928148	1.18057	3.49633	1.03067
WEE2-AS1	1.4118	-1.78661	-1.63679	0.697075	-2.33833	-1.8573	1.36931	-1.11435	2.1423	1.36256	0.977172	-1.79078	1.8573	0.431516	-1.24794	-1.11011	-1.53483	-1.49544	-1.19506	-1.86716	-0.116926	0.415195	-0.131469	-0.960975	1.32432	0.0961857	-1.1439	1.16162	1.5749	0.799565	0.896846	0.839487	-2.14717	0.0206833	0.93618	0.44051	-2.21246	-0.0206833	-1.58804	-1.61811	-1.6692	0.750309	1.42316	-1.16546	1.52335	1.09108
TCTEX1D1	0.0713263	0.087996	1.1345	0.836842	-0.669922	1.01039	0.136647	0.108885	0.899157	-3.05726	-0.637559	0.75353	0.694598	-0.314549	0.525793	-3.40648	-0.0876636	-0.144881	-0.112242	-1.64764	0.905521	-0.707643	0.315153	-1.56497	0.59077	-3.87723	1.00903	-1.66289	1.8642	-1.00854	0.759553	0.186597	-0.647276	-0.0295773	-0.109456	-1.94113	0.0295773	-0.451254	-0.748168	-1.60245	0.874375	0.912781	-2.62829	1.00443	0.974322	-0.678735
TMCO5A	-0.50999	0.214373	0.604193	-0.043663	0.595418	0.0458336	1.30236	1.16052	0.0436625	-1.90059	-1.95693	-1.29861	0.445832	-0.274511	0.990631	0.527148	-1.08899	-1.51106	-0.419663	-0.146474	0.179502	-1.44328	-0.906583	0.830288	-0.765223	2.71724	0.730153	2.50069	0.879676	-0.958605	-1.96944	0.0936017	-1.31902	-1.59612	0.698478	-1.88665	-1.79282	-0.0786276	-0.280624	-0.6452	1.20989	-0.193556	0.106679	0.445966	0.555306	0.438486
XKR6	-1.083	-0.449052	-1.19789	-0.617349	-0.150622	1.373	0.274372	-0.789213	-0.366248	1.57157	2.04112	-3.01019	-0.112792	1.1356	0.461991	2.91875	-1.29251	0.405629	0.649675	0.630588	-1.37129	0.581381	-0.270535	0.866878	-0.00921917	-0.323389	-1.56536	0.015121	2.03238	0.257713	0.555951	1.06263	-0.47707	1.06799	-0.202017	-1.29116	-1.60177	-1.12309	-0.736274	0.00921917	1.57837	-0.151375	2.05969	2.56171	0.464587	-0.879555
TSGA13	-1.35677	-0.226228	-1.20432	1.15513	0.0256248	1.02081	-0.0827131	0.0304708	-0.347277	0.943345	-1.07546	-2.62719	1.53609	0.14043	2.02066	0.956273	-0.0256248	-0.950151	0.112476	0.850012	-0.243382	-1.54104	0.0517745	-0.461971	0.961008	0.241613	-0.396087	0.492847	0.197231	-2.1928	0.100773	-1.4979	-1.09014	-1.48554	-2.23936	-1.70127	-0.870566	-3.01994	-1.64251	0.880497	0.861865	0.875258	-0.807446	1.97626	1.18319	0.928961
C9orf163	-0.213899	-0.389442	0.320415	-0.0179422	-1.33359	-1.32267	-0.76776	-0.913623	0.31624	-1.36356	0.0179422	-0.870013	-1.30475	0.957732	-0.164606	0.805867	0.474363	-0.187739	0.0979578	0.0917594	0.973392	0.391475	0.578726	0.355248	0.165667	-0.505936	-0.907618	0.398022	0.324741	0.183363	0.300626	1.05702	-1.25024	-1.15015	0.810175	-1.74253	0.504152	-0.371792	-0.516431	0.119732	-1.8165	-0.910892	-1.60758	0.380725	0.702277	-0.0960329
SYNE3	0.00391626	0.895962	0.287825	-0.658422	0.664264	-0.0299101	0.00732183	-0.551567	0.178763	-0.0914216	0.410656	0.447911	0.86563	-1.68912	-0.00391626	-1.41482	-2.16113	-0.428877	-1.17051	-1.15548	0.491557	0.0103335	0.45908	-0.0588021	0.200304	-0.449136	-0.256219	-0.0496483	-1.60589	0.33136	-0.264471	-0.213292	0.876709	0.0207186	-2.2795	-3.10204	-0.171607	0.336594	1.1266	1.28333	0.543608	-0.381032	-0.00416803	1.17515	0.753226	0.690108
CCDC141	-3.29903	0.608994	-1.10131	0.169031	-2.64584	-0.272728	-1.30703	0.750092	-0.0183225	-0.408116	-0.190091	0.655308	0.545362	1.64531	1.37398	0.656101	0.793564	0.246685	2.01787	-2.42358	2.57648	0.947292	-1.94421	1.76076	0.303536	-3.38335	0.018322	1.66393	-2.23037	-1.93594	1.69023	-2.31332	-3.12807	-1.43052	-3.42032	1.21311	0.727125	0.378038	-2.76707	-2.64001	0.661658	-1.94183	2.36359	-0.965826	-0.861448	-0.769446
HDX	-1.24684	0.65652	0.137016	-0.0185335	-0.303219	1.50758	-0.285911	-0.560051	0.159062	0.441607	-0.441704	0.54297	0.661415	-1.46332	1.17011	0.0185335	-0.325537	-0.358824	-0.903038	0.0632527	0.0688446	1.07183	-0.184913	-0.299129	0.42916	0.200287	0.479856	0.607783	0.680876	-0.411381	0.227399	-0.301221	-0.751239	1.04416	0.326566	0.182455	1.68625	-0.248626	-0.573694	-1.46278	-0.588464	-0.520658	-0.160419	-1.40195	-0.405149	0.451797
CDYL2	-0.49129	-0.0206466	0.0481067	-0.410755	-0.00210238	-1.35682	0.0424457	0.0416937	0.486774	-0.282295	-0.78891	-0.270782	-0.269789	-0.242125	0.563291	0.546557	-0.682477	0.479179	0.141798	-0.63835	0.251301	0.175176	0.463905	0.329178	0.18819	-0.523567	-0.122836	0.300324	-0.246982	0.327806	0.1027	0.0583739	-0.378962	0.275394	-0.0650258	0.00210238	0.75145	-0.130013	0.373571	0.401631	0.281804	-0.399838	-0.566061	-0.567731	-0.218539	-0.193994
SYT14	-0.0450678	1.71921	-1.27946	-1.47185	0.447843	0.0784535	-1.61307	0.42542	2.1872	0.329532	-1.21861	-0.104309	1.94211	-0.336733	1.1125	1.2117	0.623571	-1.3843	-1.27017	-1.03428	1.33958	1.80662	0.699771	0.654193	-1.17068	-0.246159	1.85479	0.653359	0.846097	0.906357	-0.392752	-1.81875	0.0450678	-1.59408	0.647098	-1.56529	-1.99137	-0.132569	1.353	-1.01539	0.716576	-0.103952	-1.49465	0.91843	-1.45048	-1.16285
TECTB	-0.0284197	-0.156107	-1.5331	0.569881	-1.82891	-1.30429	-0.313029	0.974294	1.1013	-0.967263	-0.957013	1.1727	-1.46716	-0.701366	0.758435	0.937798	-1.01947	-0.445115	-1.57132	0.542692	1.08506	0.414042	0.0284197	1.26925	1.15038	-1.93152	0.777511	0.779567	0.544136	-1.0712	1.15791	-0.821528	-0.803715	0.434645	1.1484	1.61452	0.945053	-2.08054	-0.484324	-1.20998	-0.715426	0.882246	0.720137	-0.647945	2.07383	-0.29286
LINC00896	0.0111001	-0.492318	-4.46019	-4.31537	0.0295937	-0.415472	-0.0111001	-0.813024	0.437755	-0.89017	-0.10093	-0.589147	0.735194	0.17066	0.0923789	0.565943	0.529532	-0.767994	-0.263025	0.458323	0.460545	-1.45091	0.259443	0.998453	-1.91304	-0.757946	0.178726	-1.7616	0.883857	-0.118876	0.65542	0.148042	-1.57693	-0.280399	1.76908	0.569421	-0.580184	-2.404	0.941314	1.09683	-0.0378797	0.669378	-0.698014	-0.869794	0.495136	0.398469
HUS1B	-2.42735	0.899849	0.533146	1.19908	0.275964	-0.394054	0.255118	-0.120036	0.264694	-0.44291	-0.793787	-0.641532	0.0469153	-1.046	1.39334	-0.668397	0.855358	-1.49906	-0.0469153	0.170331	0.792526	0.330745	0.689777	1.06481	1.47422	-0.787501	-0.743939	0.892493	1.27191	-2.1601	0.351399	0.299149	-0.807497	0.641511	-0.857003	-0.113961	-0.264253	-1.43737	-1.73603	-1.96928	-0.117018	-0.630017	-0.207547	0.784511	0.947216	0.78003
NPB	0.202445	-0.0638542	1.37765	-0.271104	0.298215	0.333171	0.883838	-0.560519	-0.599468	0.137085	-1.38077	-0.105234	0.145549	-0.329103	0.362781	-0.965209	0.483551	0.383777	0.356134	-0.0293217	0.530539	0.181961	0.505348	-0.384727	0.156128	0.130161	0.17001	-0.986136	-0.0133219	1.1091	-0.382682	0.471392	-0.460885	-0.373017	0.12393	-0.840802	0.558943	-0.571247	-1.17977	1.01248	-0.699967	-0.083281	-0.199307	-0.582001	-0.281441	0.0133219
CCDC34	-0.163853	-0.267118	0.304299	0.118559	-1.427	-0.526609	-0.765035	0.434054	0.756866	1.13655	0.209352	-0.237011	0.420104	-0.559699	0.149002	0.546323	-0.601699	-0.435802	0.0319033	0.663753	1.38739	0.811417	-1.76185	-0.24147	0.149543	0.674578	-2.80094	0.508991	-0.0319033	-0.32693	0.439703	-1.04558	-1.52377	-0.223088	1.33005	-0.383077	0.656447	0.849858	-0.803494	0.729931	-0.556321	-0.206464	1.18074	-2.79068	-0.320412	0.995604
LRRIQ3	-0.0339384	-1.82842	0.482794	0.725086	-0.943408	0.771111	0.927471	-0.123401	-1.9555	0.0339389	0.563585	0.673844	-0.181482	-0.706868	0.701877	-0.372726	-0.511363	-0.285264	0.231718	-2.03844	0.809989	-0.652194	0.820282	0.415552	-1.07489	-0.0451326	-2.92743	0.579161	-0.139734	-2.87588	1.57965	-1.76863	-0.527238	0.600813	-1.31167	-0.108371	-0.324868	1.03747	1.34216	1.33696	0.724786	0.912782	-0.432849	1.38713	0.530881	0.610272
ITGB1	-0.0688281	0.0164666	-0.136181	-0.275764	0.187188	0.299361	0.0453162	-0.0164666	-0.0500751	-0.0666671	-0.231845	0.921623	-0.096559	0.33329	-0.530676	0.647642	0.868667	1.05878	0.290977	-0.0635009	0.370228	0.530429	0.451511	-0.60426	0.035831	-0.348057	0.322446	0.367979	-0.388505	0.302946	0.335816	-0.0468278	0.27436	-0.131768	-0.580181	-0.072515	0.289222	0.17233	-0.101994	-0.513265	0.06671	-0.0486484	0.296585	-0.529822	-0.174546	-0.710213
PPIL6	0.120652	-0.306525	-0.640005	-0.462898	-0.34525	-0.181363	0.600697	0.446415	0.776693	-0.245808	0.402593	0.0394297	-0.0871401	-0.375043	0.654422	0.809884	1.01761	-0.192313	-0.931096	1.00364	-0.644357	-0.183094	0.0250983	-0.209371	-0.11319	-0.980422	-0.0986285	-0.218105	0.291433	0.389756	-0.719474	0.956076	0.393033	-1.07387	0.849312	-0.261826	0.182339	0.306013	0.772367	0.984127	-1.75792	-0.0250983	0.668915	0.418606	0.490933	-0.11967
SP1	-0.152232	-0.507435	-0.61526	-0.23773	-0.7106	0.137927	-0.295711	-0.283635	-0.262386	-0.23571	0.110613	-0.0811861	-0.190984	0.017256	0.149486	-0.0604246	-0.000771	-0.521063	-0.174367	-0.357413	-0.456489	-0.229957	-0.371732	0.0655053	-0.0766313	0.351706	0.0645039	-0.0211399	0.141927	0.513269	0.937505	0.125695	0.00483728	0.303007	0.589601	0.472936	0.802062	0.48203	0.724671	1.09557	0.788795	-0.203531	-0.572072	0.26011	0.000771	0.0230124
SGO1	-0.219524	0.760432	-0.230687	0.22125	-0.359858	0.52356	0.891227	0.516618	0.198151	-0.173891	-0.117652	-0.169354	-0.104579	0.445569	0.820795	-0.139911	0.218147	-0.36531	-0.365976	0.181604	0.591392	0.131995	-0.0796623	0.404845	-0.0727582	-0.779948	-1.67939	-0.24178	0.624569	-0.74767	0.147325	-0.238359	0.26148	-0.0932069	-0.290853	-0.10251	-0.293569	0.461464	0.787002	0.196302	-0.0303049	0.944338	0.0303049	0.616681	-0.180086	0.914497
B3GALNT2	-0.345899	0.0118327	-0.101089	-0.575954	-0.423035	0.665705	-0.37184	0.30341	-0.337142	0.45207	0.237597	-0.077333	-0.230056	-0.341833	-0.502713	-0.284837	0.485546	-0.825767	-0.128261	-0.452854	-0.196078	-0.0118327	-0.345354	-0.224003	-0.0403152	0.324342	-0.141617	0.434983	0.449203	0.773273	0.451608	0.168891	0.528217	0.683247	0.899626	0.351625	2.08927	1.09595	1.43551	0.947035	0.811984	1.00315	-0.0420861	-0.475658	-0.386799	0.562697
ZNF569	-0.0557063	-0.0748537	0.760095	0.431152	0.00261521	0.541486	-0.356682	0.256259	0.097327	0.162284	-0.143714	0.251325	0.526176	0.681147	0.328196	-2.13826	-1.34874	0.0169265	0.443282	0.134581	-1.29644	0.442046	0.076916	-1.21859	-0.0769403	0.0341942	1.09506	0.859937	-0.669833	-0.162207	-0.719898	-0.612815	-0.364552	-0.00261521	-0.363833	-0.18757	1.9994	-0.131801	-0.156927	-2.76345	-3.64822	-2.20361	-0.870329	0.743024	0.323888	0.0201797
CCSAP	-0.536909	-0.0613697	-0.427196	-0.519489	0.178083	0.360735	0.286048	-0.404766	-0.984808	0.759784	0.616353	-0.412892	-0.603668	-0.436321	0.143888	0.186319	-0.0251229	-0.634531	0.0795581	-0.474613	0.695578	-0.854038	0.282546	0.757689	-0.218774	0.290706	-2.07752	-0.100031	-1.16073	0.507018	-0.996437	-0.0209286	0.585828	0.0209286	-0.192692	-0.869046	1.99746	1.13519	1.52175	0.704795	0.798913	1.01387	-0.948304	-0.894116	0.0840781	0.443604
ZNF791	0.297337	0.0607872	-0.0905495	-0.0262537	0.289316	-0.223718	-0.310195	0.178424	0.163517	-0.240335	-0.452236	-0.0523224	0.125673	0.1387	-0.208765	0.845762	-0.379491	-0.378404	0.0964775	-0.340873	0.063982	-0.0219355	0.281749	1.12778	0.0632286	0.255547	0.498726	0.0399818	-0.0532713	-0.490782	-0.201126	-0.30848	-0.0818596	-0.195409	0.0616989	-0.0516853	-0.116567	-0.160239	-0.0373735	0.0219355	-0.305963	0.149272	0.478647	0.765972	0.148046	1.01464
HTRA4	-4.69066	-2.23786	1.0916	-1.65826	-0.0150986	-0.109021	-2.63982	-0.548087	-3.24317	0.0208149	0.357966	0.489701	-0.744262	-1.68354	0.881278	0.0462966	0.108959	1.45836	0.178634	-0.30459	0.623623	0.756576	-0.897401	-0.907913	-0.664453	0.773075	0.866936	0.78822	0.00676966	-1.95661	-0.0177016	-0.730784	0.228006	0.029294	-1.18896	-2.95607	-3.69399	-1.2472	-0.00676966	0.444218	0.35233	0.58022	0.104841	1.36211	0.14367	-0.141343
LINC00525	0.43902	1.26259	0.169617	0.242399	-0.965444	-0.301712	1.04546	-0.434668	0.369337	0.0549419	0.0258119	0.212692	0.411013	0.565309	1.57472	-0.398047	-0.214222	0.507731	-1.86422	-1.9976	-1.44627	-0.502678	1.10831	-0.309309	1.17874	0.500798	-1.35994	-0.496277	1.2435	-0.376177	0.193557	0.540351	0.0992458	-0.869871	-0.335051	-0.26791	-1.27405	0.585454	-0.159165	1.05271	0.659838	-0.734074	-0.249865	-0.0258119	-0.312562	-0.237735
FAM218A	0.956741	2.95894	-0.469768	-0.297236	1.21064	-0.441014	-0.554737	-0.238648	2.68722	-1.98724	-1.72288	1.20128	0.074441	2.17115	2.95922	-2.28765	1.69918	-1.07546	0.475516	2.192	2.06713	-0.101599	0.827918	0.316814	-0.13318	0.267468	2.51479	1.37711	-0.792478	-0.866531	2.33359	-2.62551	0.244	1.6704	-1.42128	-0.241659	1.0552	-1.39065	-0.843639	-0.074441	-0.912528	-0.409752	-0.760366	0.505882	-0.222837	1.73938
RHEBL1	0.401237	1.14778	-0.0277152	-0.274216	0.255519	-0.264101	0.539955	0.504442	0.633201	0.0731754	-0.433942	0.373306	0.0277152	-0.0718975	0.272199	-0.292131	-0.671842	0.0320296	0.36053	-0.262942	0.450831	-0.724946	-0.854052	-0.0529027	0.652589	0.514738	-0.825381	0.0337534	-0.716613	-0.838881	-2.70903	-0.494062	-0.115713	0.791698	0.489579	-1.22977	0.322196	-0.119023	1.05311	-2.21804	-0.374841	0.428329	-0.442679	-0.599539	1.04041	0.496718
ZNF548	-0.023839	0.378485	0.58049	-0.273795	0.00746918	0.0441437	-0.00746918	-0.747297	0.564862	0.643182	-0.0926337	-0.0514956	0.238139	0.343009	0.151487	-0.818173	-0.730973	0.0327473	-0.204133	-0.433973	0.28229	0.0155005	-0.255235	-0.431622	-0.336861	-0.119	0.256096	-0.348618	-0.107312	0.627764	0.64816	-0.0167985	-0.158257	-0.552445	0.895757	-0.0553598	0.619826	0.223611	-0.684269	-0.103797	0.22976	0.326712	-0.146364	0.646872	0.228423	0.143272
AMER2	-0.964364	1.42782	0.0227623	-0.414457	0.124403	-1.79125	0.630026	0.348162	0.625094	-0.642816	-0.834227	-0.600092	-0.0166779	0.282135	0.27335	0.389752	0.00302506	-0.0377083	-1.26314	0.456695	0.224697	-0.0649672	2.24951	-1.22247	-0.378828	0.283162	0.90061	1.52359	-0.192883	0.0335894	0.509371	-0.118606	-0.050086	-0.00302506	-1.19853	1.00168	-0.705573	0.0297751	-0.825194	-0.129466	-0.213028	0.225588	-1.0258	2.44072	-0.124588	0.273622
RNF152	-0.395462	-1.038	1.81175	0.0473361	-0.209361	1.14033	0.198093	-0.261317	-1.06287	0.663059	0.839214	-0.0473361	-1.24931	0.752942	0.757258	0.234971	-2.4161	0.571194	0.511982	0.947088	-0.14729	-0.352418	-3.62948	-2.17337	-1.52442	-0.152118	0.262619	0.934801	1.0951	-1.39674	-0.567038	-3.46393	0.111752	1.2791	-4.0295	-3.55057	-2.36858	0.611016	-2.23842	-0.396094	0.205009	0.735223	-1.95306	0.629493	2.43542	1.11025
ZNF644	-0.144486	-0.237792	-0.115511	-0.785563	-0.658412	0.285012	-0.0490365	-1.26032	-0.566218	-0.227413	0.223933	-0.433893	-0.0377784	0.00192785	-0.112565	0.0260692	-0.00192785	0.451939	-0.879773	0.5522	-0.50197	0.0316319	-1.06908	-0.266798	-0.108119	-0.626655	-0.35484	0.15905	0.226562	0.532609	0.474429	0.126815	0.0520139	-0.113046	0.349345	-0.024262	0.380294	0.433108	0.212339	0.412809	0.294302	0.982664	-0.254941	0.468829	0.0951676	0.46625
LRRC43	-0.44736	-0.699956	-1.58048	0.362731	-0.178264	1.40335	0.128317	1.02377	1.13293	-0.564935	-0.265833	-0.238282	-0.419905	-0.305537	-0.186277	-0.202474	-0.982204	0.287669	-0.380396	0.0121851	-0.352477	0.486623	0.3335	0.381122	0.41163	0.62585	0.19383	1.51385	0.10066	-0.206562	0.16418	1.44553	-0.0121851	0.309233	0.435934	0.525993	-0.433466	0.532603	0.299802	-0.704958	0.391123	-0.943167	-0.938535	-1.45098	-0.447485	-1.37821
CEP89	-0.0558953	0.680988	-0.495278	-0.125118	0.523962	0.359841	1.18478	0.564485	0.0221567	0.348119	0.383986	-0.0958362	-0.429097	-0.215303	-0.290922	1.51024	0.211505	0.185391	0.623034	-0.0504823	-0.543498	-0.0690923	0.339675	0.25158	0.409571	0.25879	-0.260422	0.703626	-0.658105	-0.0572419	-0.82414	-0.414132	-0.137358	-1.01766	-0.905414	-0.975612	0.351333	-0.0116134	0.58952	0.114305	-0.21331	0.306691	0.272222	-0.373001	0.0116134	-0.134006
IRAK2	-2.50021	1.42844	-0.997926	1.7012	-2.57921	-1.21311	1.39285	1.69667	0.698606	-1.8679	-0.562201	2.0007	2.47998	-2.01035	2.21287	1.9391	-2.35174	2.73201	-0.110157	-0.4794	1.47903	2.00205	1.41585	0.110157	1.31987	2.43829	1.01814	2.58003	-1.58185	-1.92688	-0.792583	-2.48034	-1.44952	-0.510715	-2.25825	-2.23442	-2.50279	1.57812	1.54953	-1.52778	0.91638	-0.444554	0.705966	1.67293	-0.419681	-0.124533
LINC00337	1.41613	0.853507	0.497677	-0.928075	-0.100582	-0.409555	-0.681586	1.08614	-0.408526	-0.434287	-0.59339	-0.205678	3.65209	2.54261	0.019453	0.243737	0.766499	-0.25283	-1.02631	0.696959	-0.656713	-0.326658	-1.54321	2.71063	1.81241	-1.24725	-0.628776	-1.19567	-0.0194526	-0.680422	0.36214	-0.31572	-0.248527	3.40725	-0.434142	0.780889	0.653779	0.727939	-0.528766	1.89369	2.39709	-0.963332	0.764994	0.32731	0.931048	1.16989
METTL21A	-0.437003	-0.198804	-0.289006	-0.522483	-0.0060668	-0.292917	0.998185	0.39209	-0.213903	-1.16908	-0.484025	-0.0754671	-0.521379	-1.09306	0.502355	-0.0860686	1.21962	-0.942814	-0.107507	1.04085	-0.308977	0.966414	-0.342501	0.675601	-0.0147495	-1.12155	0.0060668	0.191243	-1.22356	0.320761	0.243925	0.57042	0.755233	-0.134647	0.108221	0.144187	0.777174	0.421014	0.534629	0.539363	-0.369973	0.854445	-0.663436	0.260809	1.04214	1.37789
OTOGL	0.439895	-0.295692	-0.300949	1.04578	0.170619	1.62241	2.26505	-1.73275	-1.28469	-0.286649	2.26145	2.35524	1.85337	1.62402	2.82699	-0.344717	1.80644	-0.876316	-0.592999	-0.0435896	0.0397449	0.330704	-1.30357	0.530927	-0.0397453	1.80293	-1.06087	1.31551	1.64249	1.29101	2.37138	-0.612518	-1.27131	-1.83991	-0.32413	-1.43528	-0.596408	-1.03892	-0.353135	1.80122	-0.493344	2.65817	-0.683003	-0.343716	1.80935	0.819234
MGC16025	-0.20206	0.414062	-2.15583	-0.0195489	-0.484375	-1.7722	-3.31837	1.47695	3.22106	-1.06271	0.107539	-3.2813	0.565574	-1.10301	1.05261	-0.905895	2.05055	1.30097	1.70903	1.21242	0.969331	-3.12241	-0.898058	-1.12214	2.16024	-1.97178	-0.711863	0.915124	0.519762	-2.02953	-1.82689	-0.321125	0.924836	-1.09619	-0.8715	1.67174	0.115556	-2.18246	0.706882	-0.0115218	1.39141	0.0115218	1.6114	1.16259	-0.686647	1.63718
FAM76B	0.519729	0.450528	0.260234	-0.988115	-0.404897	-0.185737	0.894532	0.581199	0.177815	0.477208	0.47189	-1.21961	-0.25547	0.793203	-0.220222	0.593399	0.374865	0.459467	-0.545271	1.29602	-0.182168	0.150656	0.545919	-0.0950634	-0.0490291	-0.64504	-0.236414	0.637906	-0.592753	-0.727488	-0.354586	-0.389724	-0.133154	0.0490291	-3.30696	-0.266459	-0.213579	-0.214416	0.453924	0.48065	-0.296682	2.26405	1.57126	-0.43278	0.652113	0.503357
SPATA25	-0.0318851	-0.258286	0.205012	0.864193	-0.112742	0.146963	-0.0334868	0.0171723	0.760343	-0.377355	-0.278264	-0.103271	0.217054	2.82981	0.167474	0.989687	0.173608	0.340757	-0.294193	0.0873342	0.116288	0.590078	0.421372	0.981593	-0.33673	-0.118109	-0.198784	-0.395726	0.997131	-0.802342	0.599534	-0.533446	-0.342289	-0.0929284	-0.767177	-0.704396	-0.773912	-0.758954	-0.281786	-0.181467	1.30517	1.65546	0.821676	0.421949	0.497925	-0.0171723
NXNL1	0.834796	0.531988	-0.265251	1.46926	-0.334744	2.22883	1.52205	0.358204	-0.223126	-0.179326	-0.157619	0.0969777	0.66325	-0.139194	1.28484	1.89994	0.436714	0.816008	0.31026	-0.253534	-0.792045	-0.123165	-0.270121	0.206268	0.0827332	0.910426	-0.76634	0.814288	0.86403	0.794361	0.577961	-0.380422	-0.369631	-0.11306	-0.601104	-0.479066	-0.899293	-0.278211	-0.297271	-0.162722	0.585683	-0.71221	-0.349137	1.22296	0.636589	-0.0827336
GLIS3-AS1	-1.0729	0.504513	1.78187	-0.481889	1.00288	-1.57901	-0.181545	-0.662962	-1.33832	-0.88959	-1.61895	-0.823458	-1.88128	1.98765	-0.515718	-2.52944	0.376762	1.18531	0.821806	3.28743	-0.504594	0.532081	-1.66839	1.3722	-0.300933	0.562278	0.389332	-0.342588	1.48195	0.603803	1.17804	-1.69967	1.2395	-0.856414	0.868819	0.633476	0.966928	-1.87635	0.454412	2.03247	0.181545	-0.627834	-2.7628	1.77274	-0.414123	-0.894281
PRR14L	0.620797	-0.0998249	0.834554	-0.381804	-0.922915	-0.519064	-0.011816	1.15259	0.270942	0.512311	-1.24657	-0.972519	0.418297	-0.418289	2.05653	-0.341337	0.47088	-0.378632	0.54846	-0.794584	-0.583078	0.128511	-0.0746799	-0.410027	0.011816	1.83941	-1.07558	-0.323775	-1.45428	1.54655	0.499225	0.676203	-0.361192	-0.205333	-0.446275	0.0814195	-0.36148	1.68991	2.14015	0.0875568	2.19034	0.198119	0.528379	-0.884512	-0.0707459	0.0532761
KLHL32	-0.803745	-0.0523562	0.402021	0.522157	-4.77498	-1.59189	-3.60348	-2.83134	1.93775	-0.808617	-0.256963	-0.199877	0.731787	2.11986	-0.43337	-4.69353	-1.28839	-2.1484	-0.558558	-0.355104	0.225739	-1.06715	0.0523558	0.3277	-3.43808	0.515343	2.40153	0.281143	1.24428	-1.93712	0.779092	1.55871	0.589199	1.1873	0.834083	1.49288	3.90773	-4.66154	-0.360612	3.00435	-0.0864139	0.695377	-0.214192	1.39817	-2.29798	1.09256
SLAMF9	-1.6576	2.06341	-0.836319	-0.920011	-0.176573	0.839049	0.0750704	-0.661624	1.42711	0.431918	1.15978	-0.231067	1.52177	2.65617	1.50175	-1.01714	-1.04329	-0.514752	-0.840471	0.173369	-0.753315	0.60212	0.653852	0.960871	-0.511169	-0.224487	-0.134378	-0.940145	-0.613715	1.85547	-0.230948	0.826093	0.566875	-1.84943	0.203805	1.48018	0.822541	-0.187601	-0.785305	2.21435	-0.140542	-1.0922	0.516259	0.798834	-0.0750704	2.26132
LOC152048	0.00620866	0.854824	0.14603	0.515813	-0.603594	-2.55236	-1.53372	-0.329727	0.694151	-0.090112	-0.77558	-0.242208	-0.698641	-0.411648	0.469631	0.14945	-0.849359	0.086323	-1.91172	-0.467483	0.0368397	0.322321	-0.0884488	0.3833	-0.367981	-0.0605996	0.735141	0.222553	-0.123324	0.170324	-1.85224	0.613245	-0.0912788	0.188057	0.659428	0.191826	-0.157003	0.154554	0.134762	0.363742	0.236773	-0.127952	-0.00620866	-1.3143	0.29442	-1.21395
UBE2U	0.809619	1.81474	-0.838961	1.86285	-0.328224	0.474025	1.49648	-1.71515	3.18744	1.98243	0.929108	-2.21697	-0.626867	-1.88114	-0.702528	0.650384	-1.27163	1.86179	-0.503649	-2.17735	-0.349921	-0.963818	2.10834	1.55241	-1.13286	2.25528	-2.22737	-1.41181	2.66215	1.43591	-2.21938	-1.50079	-1.65004	0.230274	0.106606	0.966135	-1.95352	1.28023	2.01128	-1.01093	-1.13477	1.09252	-0.143265	2.30148	-0.106606	0.188542
METTL27	2.51204	1.42441	-0.807292	-1.03415	-0.226677	-0.484704	-1.10619	-0.364777	0.419196	0.018369	-1.12031	-0.249081	0.418079	-0.710027	0.713068	0.985281	-0.274353	0.00381303	-0.920915	-0.00381303	-2.19878	-0.769921	1.7828	0.381887	1.30653	0.989129	-0.981632	-0.910758	-0.164079	0.771132	-1.15648	0.449599	0.981075	0.361338	-0.105909	0.732043	0.446427	-0.282597	0.889237	0.241147	0.0218565	-1.05181	0.252108	-0.10287	-1.88658	0.366964
LINC00638	-0.00490212	-2.35375	-4.23824	-0.242951	-3.01785	0.439203	0.415602	-1.09811	0.527838	-0.322615	-0.453376	0.703531	-0.34574	0.64285	0.0351121	0.677597	0.291743	-0.235521	-2.1403	1.31898	-0.547837	0.396402	-2.15003	-1.87532	0.641041	-1.95618	-1.56702	0.80138	-1.30598	0.428508	0.325071	0.133968	0.678547	0.276331	0.00490212	-0.0302827	0.752652	0.812357	0.490305	1.07404	0.555001	-1.24394	-0.0326874	-0.102369	-2.37576	-1.82764
C11orf45	-3.72037	0.646917	-2.06245	0.866102	1.12652	-0.0644491	-0.711752	-0.5612	0.121841	-0.281378	-0.789227	0.993304	0.626154	-0.688365	0.447324	0.349819	0.0360701	-0.883789	-0.238145	1.1745	1.11992	0.269104	0.0132463	0.55525	-0.161171	0.336551	0.745972	1.17199	0.161506	-0.431553	-0.0132463	-0.573859	-1.58451	-0.37824	0.318983	-0.545414	-0.6162	-0.370159	-0.73992	0.226821	-0.822975	0.0325096	-1.02874	0.856528	1.12447	-1.24097
STOML3	0.0125008	0.589201	1.44745	-0.506453	-1.78436	0.785424	-1.4165	-0.365672	-0.157526	-0.371325	-0.545193	-3.4878	0.0559878	-1.55043	1.06225	-0.549856	-1.11611	-0.498294	0.0856395	0.552329	-1.07529	0.936688	0.56921	-0.666679	0.38838	-0.0125012	-0.207263	0.583442	1.16647	-0.105163	0.113163	0.709131	-1.07989	0.736701	-2.39564	0.963483	1.25992	-2.59037	-1.54971	0.930512	-2.03641	-0.632155	0.541102	1.87937	1.19826	0.652308
SOX3	0.859652	1.31613	-0.441415	1.23077	-0.56936	0.905067	-2.04043	-0.156637	0.871504	0.0635591	-1.34289	-1.03064	0.358084	-2.64109	2.42643	-2.81974	-2.09149	0.0258884	1.93033	-2.15062	0.987185	1.88479	-1.41765	0.237086	-0.0242681	-0.863552	1.13174	-2.0137	-0.377221	0.0242677	2.48339	0.409538	0.0858321	1.46606	2.09933	-0.196685	-0.953842	-0.861253	-1.27263	0.264204	-1.50513	-1.35651	-2.13368	-0.413312	1.13764	0.998009
SPATA32	-0.549424	0.806171	0.339673	-0.215945	-0.0954986	0.311921	0.0773349	-0.426635	0.765941	-0.327599	0.868101	-0.710192	0.591926	-0.759586	1.23661	-0.438145	-0.0804286	0.67146	-3.27996	-0.580493	-0.300341	0.727847	-0.339961	0.162769	-0.0225558	-1.89583	-0.23648	-0.180708	-2.69055	0.191507	0.184195	0.349704	-0.479407	0.0602422	-0.023416	-1.61537	0.153316	0.0225558	-0.474212	0.166862	0.74893	0.121474	-0.134639	1.04108	0.193922	0.418504
C3orf49	-0.156575	-1.34338	-0.198093	-0.0280678	0.369159	0.527589	0.03283	-1.38289	0.819966	-0.26746	-1.32653	-0.535754	-0.0617297	-0.578913	0.673249	0.535518	-0.0337675	0.081661	-0.206611	0.742528	-0.23242	0.466905	0.273969	0.625443	-0.0800345	0.451411	0.0816424	-0.161247	0.824473	-0.0482476	0.282145	0.0984061	-0.493421	0.0489514	-1.20361	0.0280678	0.832608	-0.512466	0.259747	0.941674	-0.245305	-0.293617	0.681049	0.773041	-0.817357	-0.883457
NKX2-3	1.25862	-1.36349	1.43558	1.37947	-0.0898011	0.30328	-1.30136	0.445772	-0.311234	-0.120561	-1.12878	-1.25203	1.53127	0.537729	-3.0403	-0.392978	0.257707	-0.584338	0.101651	0.137732	0.50811	-0.379345	-0.899601	0.397305	0.492409	0.36581	2.03114	0.970802	-0.323807	-0.296612	1.19901	-0.453191	-0.0316737	0.801979	0.50475	1.2308	-1.14455	-0.243055	-1.55211	-1.16061	0.332579	-0.203009	0.0316737	0.184599	-0.275115	-1.4843
TMEM252	-0.0852578	3.11818	0.161272	0.477867	-0.0622723	0.252302	-2.36733	-0.734287	1.29178	-1.80416	-1.04678	-0.162269	0.235274	-1.56454	2.63685	-0.318011	-1.79112	-0.353205	-1.47683	2.94116	-0.818524	0.0622723	0.73752	-0.641435	-0.617639	3.13435	-0.746515	-0.351296	0.348707	0.162435	-2.22836	0.679992	-1.79902	-1.10285	2.99779	0.564858	-1.22321	-0.263766	1.60293	-0.181713	0.870562	0.265518	0.5501	0.238382	0.8441	0.0958679
CIP2A	-0.377002	-0.0225365	0.110077	0.0426772	0.0225365	0.992048	0.871634	-0.354474	-0.308936	1.07646	-0.120406	0.585749	-2.51423	0.380007	0.472897	0.690041	0.529531	-1.03638	0.182016	0.265713	0.741754	-1.11789	0.465105	-0.635493	-0.0778983	0.876806	-0.894136	-0.173343	-0.479417	-0.323817	-0.22818	-0.639738	0.332793	-0.0609195	0.446078	-0.522568	1.20619	1.29207	1.35252	-0.689582	-0.846726	0.873081	-0.106525	-0.727987	-0.561644	0.307012
FAM222A-AS1	0.434284	0.456209	0.613223	-0.0408747	0.574409	0.0355613	0.427985	0.705702	-2.10938	-0.0970757	0.253223	-0.0486648	0.682231	0.0984909	0.213302	0.736152	0.621314	-1.46926	-0.721774	-2.67061	0.1439	0.397351	0.491972	-0.364172	0.540067	-0.198166	-0.999299	-0.2805	-0.0782096	-0.0266507	-4.07303	0.519042	-3.74864	0.454184	-2.1459	-0.0746667	-0.0874808	0.0266507	0.550259	-0.331668	0.0294716	-0.418401	0.028553	-0.124848	-0.0897381	-0.0991747
TLE6	-1.00658	-0.240064	0.443097	0.479846	-1.08265	-1.21079	0.0643196	0.338737	0.643683	-0.315262	1.74822	-0.982971	0.520863	-0.153286	-0.7563	0.119606	0.614482	-0.890758	0.01015	0.216325	1.11976	0.51765	-1.37935	1.08111	-0.888504	-1.51523	-0.11246	0.12744	0.308436	-0.918863	0.380546	-0.0869951	0.409826	0.829139	0.0604992	-0.127866	0.208084	-0.963535	-1.13568	-0.01015	0.246905	-1.00425	-0.0903749	-0.554088	0.377609	-0.0183954
TCEANC	-0.921545	0.260207	0.222469	0.344725	0.0114398	-0.910955	0.341085	-0.00179863	0.182678	-0.526966	0.178335	-0.169338	-0.118098	0.0719132	0.867277	-0.636376	0.00179863	-0.112733	0.36148	0.659335	0.988477	-0.163317	-0.24948	-0.170476	-0.113712	0.437878	-0.0703306	0.245441	0.667252	-0.0507536	-0.468633	-0.0139761	-0.161635	-0.0613871	0.389496	-0.0549107	-0.926729	-0.591045	0.161224	0.013166	0.0144181	0.458412	-0.553677	0.274691	-0.264641	0.490877
RTP1	0.0105901	0.194049	2.5867	2.08318	2.6795	-0.0105906	2.74099	-0.426206	2.93058	0.856075	-2.33132	0.198175	0.282433	-0.200008	1.53451	-0.142209	-0.0627961	-0.131513	-1.26544	0.173543	1.71056	-1.19244	1.91679	-2.30076	2.7731	-2.37962	2.81564	-0.884193	2.0575	-0.240758	-1.2338	-2.2917	-2.2781	-0.579011	-0.17087	0.094996	1.70957	1.09995	-1.91187	-0.415869	-2.39392	-0.270773	-0.267703	1.23614	2.04949	0.0641036
PRR35	0.539505	-2.28562	0.361142	-1.05189	-2.32307	0.389096	-1.87279	0.569045	0.608592	0.109399	0.21996	0.241394	-0.597182	0.213052	0.265006	1.13887	0.244965	0.336781	0.572034	0.633662	-0.00590968	0.494174	-0.559006	-1.68008	-0.490098	-0.347732	-1.75555	0.121243	-2.04383	-0.587939	-1.5091	-2.427	-0.846421	-0.978981	0.285257	0.512038	0.0277836	0.00590968	0.44507	-1.35095	-0.343067	-0.110095	-0.277498	0.0861766	-1.26426	-2.00044
NXPE1	-0.849541	-0.0320206	1.81877	1.77736	-2.34632	-0.860307	-1.9995	-0.990683	0.258179	-1.21932	-1.42796	-3.18051	1.38705	0.99414	-1.787	0.728239	-1.1746	-2.85647	0.0320206	-1.37428	-2.5459	1.04146	-0.865981	-0.0339136	-0.415148	0.425806	1.35164	-2.6007	1.67072	-0.971137	1.45856	0.878347	0.820416	1.77759	1.33188	1.95172	-2.62085	0.177737	-0.544867	1.6753	1.18186	-1.89997	-1.24163	1.70007	1.17235	1.88596
CYP1B1-AS1	0.251114	0.206246	0.722101	0.0428491	-2.23202	1.39873	-1.04774	0.0595145	1.07525	-0.282635	-0.0428491	-0.394411	1.06754	-1.05271	-0.7439	1.71716	1.99333	-0.888906	-0.32518	1.26401	-1.3802	-1.06837	1.25669	0.564465	-0.837122	-1.77689	2.9573	-0.763613	-0.50676	-1.21527	1.26985	-0.752023	-0.655803	2.03194	-0.458929	1.30986	-0.323326	-1.03274	-1.88632	0.635232	-0.539239	1.64183	0.548995	1.22143	2.16533	3.30594
APOBEC3D	-0.83052	0.378119	-0.406912	-2.25656	-0.657214	-0.765781	-0.322628	0.404067	-0.257219	-4.58856	0.0441153	-0.539095	-1.09203	0.310191	0.781996	0.360984	0.309159	0.392214	-0.817203	-0.687993	0.373823	-0.0372908	-0.697426	0.269858	0.0173781	0.000696	-0.472154	-0.194682	0.437743	0.427585	0.152198	0.306842	0.259615	-0.307594	0.470756	0.681489	-0.000696	-0.196823	-0.407364	-0.0506575	0.119658	-0.0860293	-0.712356	0.405694	0.795008	1.1247
LINC00315	-0.0806685	0.526782	-1.29094	1.03507	-0.448157	-1.00288	-1.66178	-0.022109	1.45709	0.224679	0.19188	0.156907	0.967721	-0.358194	0.378864	-0.42323	0.263851	-0.202925	0.022109	0.507139	-1.65899	-0.277124	-0.0271287	0.346262	0.0424604	-0.289447	-0.0233941	-3.44061	-1.87892	0.486081	0.366495	0.666932	-0.398038	0.475867	1.09328	0.943799	-0.077281	0.517913	-0.0317183	1.1716	-0.184618	-1.31983	-0.0290685	0.0306187	0.971628	-0.273536
COL6A5	-2.40494	0.295506	1.43334	-1.9258	-1.1425	-2.92444	1.32569	0.431542	0.587237	0.826787	-3.3316	-1.98136	1.17531	0.348756	-1.22378	-1.94321	-2.32333	0.930427	0.788769	1.2095	-1.30277	-0.518143	-0.188002	-2.10557	0.92839	-1.37005	-2.22471	1.41804	-1.14666	0.860442	1.00202	1.79038	-1.84754	1.52218	0.547462	-1.19062	1.28644	0.188002	-2.18253	-0.523322	0.536873	-0.897954	2.40233	-1.79597	-1.06776	0.700113
PGAM5	0.333076	-0.861334	-0.152276	0.517303	0.612124	0.356756	1.35372	0.559612	0.83004	0.125652	0.245779	-0.39182	-0.25983	-0.195734	1.55245	0.300146	0.566751	-0.0760694	0.207314	-0.403018	0.207355	-0.338315	-0.124318	0.327608	-0.402678	-0.88806	-0.287473	-0.438198	-0.343645	-0.0626555	-0.00385046	-0.661688	-0.732644	-0.464127	0.784407	0.244014	0.00384998	-0.189146	-0.127835	-0.524562	0.605569	-0.365271	0.526334	0.644654	1.57701	1.05493
C4orf45	-2.77123	-2.87764	0.304155	0.575558	-0.174098	-2.25846	-3.31307	0.291093	-0.110769	0.0381718	-2.95773	-0.896643	0.443232	-0.0381713	1.90174	0.807605	0.566242	0.316147	0.258439	0.766074	-1.33286	0.233222	-1.79781	-0.851045	1.19378	0.289459	0.59112	-3.50087	0.524609	-0.428766	0.249388	-3.79715	-0.933373	1.14696	-1.69109	-2.1406	-1.21377	-1.97623	0.665637	-0.198879	0.546629	-1.01873	0.348973	1.20114	-2.81001	0.460888
BEND2	-0.303842	1.29701	-1.66201	-1.06866	0.975293	-0.161665	-0.252527	0.690858	0.793874	-0.154181	-2.43907	-3.76313	-1.09896	-0.0337353	-0.911091	-3.03798	0.37797	-0.979375	-2.1521	-0.660102	-0.444354	0.998483	-0.67615	-1.98478	1.36349	0.894719	0.0338368	0.0337358	1.47707	0.274477	0.685865	-1.10082	-1.05845	0.712856	-2.3875	-3.31182	0.485597	0.286638	0.0516753	0.610394	1.49279	1.1726	0.664243	1.3414	-1.01316	0.894273
C10orf67	1.5987	-0.353867	-1.82566	-0.254974	1.09971	1.35584	-0.0453072	-0.937511	0.12644	0.032186	1.65245	-1.57017	-0.053257	-1.15234	0.721106	0.282027	1.42267	0.904665	-0.159098	1.67371	-1.02042	-0.653584	1.64856	1.38874	-1.16673	0.024878	-0.486455	-0.218015	0.691195	0.630838	-0.966155	1.20856	-1.33054	-0.880461	1.42595	-0.024878	1.14194	-0.0960731	0.196323	-0.807608	1.0092	-0.376461	-0.18629	0.102118	-0.746951	0.556583
CBY2	-0.466825	0.13789	0.916999	0.489209	-0.270667	-0.13789	1.40944	-0.264229	1.08921	-0.265008	-0.974535	0.334767	-0.57508	0.75652	-1.00466	-0.825299	-0.50682	0.984513	-0.616984	1.23031	-1.07025	-0.162389	1.20906	-0.806137	-0.260157	-1.73802	1.63464	1.49769	0.822216	0.559257	1.28974	-0.798149	0.351309	-1.08425	-0.788972	1.02997	-1.16479	-0.212794	-0.273479	-0.285337	1.41605	1.03332	1.35532	0.867128	1.45668	0.293764
CCDC26	-0.812103	0.313594	0.410537	0.70991	-0.247216	-0.351884	-0.329133	0.915902	2.65287	0.0343699	-1.94725	-0.830835	-1.15488	0.343685	-0.791402	0.0112576	-1.99591	0.873077	1.11943	0.675092	-0.479658	-1.25897	-0.50031	-2.65874	0.646718	-0.496775	-0.0112581	0.273364	1.38027	-1.60658	-2.40102	-1.2623	0.943181	0.876572	0.35823	-2.93735	0.689455	-0.109958	-2.57666	0.270935	0.421209	-0.253164	0.499204	-1.99837	1.35873	0.234173
SPIC	-0.023809	1.10332	-1.53855	1.83398	-0.666251	-0.791017	0.722373	-3.09978	1.84935	-1.12868	-1.78796	0.152574	1.61631	0.579649	-0.888289	-1.9957	-1.54262	-3.28843	1.36453	0.0715284	1.15786	0.909066	-2.38243	-2.0388	0.0238094	-0.0942764	1.19099	0.184976	0.974294	-1.73347	1.13788	-1.57755	1.30286	1.36449	1.11271	-2.54521	-3.11128	1.11703	-2.24443	1.45641	-3.75138	-2.91989	-0.647112	1.70918	1.36233	-1.18561
IGSF22	-0.649157	-0.12025	0.0693164	0.377627	-0.274826	0.11785	1.02848	1.28713	0.129385	-0.417208	0.617712	-0.865101	-0.293467	-0.0711393	0.133072	-0.567426	0.174779	-0.718047	-1.09303	0.520388	-0.283442	-3.67163	0.669033	0.930253	0.0190182	0.160995	0.0942884	-0.0505648	0.216317	-0.495077	-0.466773	0.440912	0.447536	-0.355609	0.589924	-0.0190182	-1.36843	0.219952	0.458516	-1.03826	-0.524691	-1.30795	-1.24275	-0.452227	0.141342	1.16112
ZBTB3	0.581353	0.33394	0.786499	0.409108	0.0529358	0.381293	0.0196774	-0.723799	0.466588	0.579054	0.1324	-0.140921	0.346236	0.342243	-0.147537	-0.467872	-0.116433	-0.123845	0.338692	0.539032	-0.206412	-0.450628	-0.282577	-0.0196774	0.15836	0.0324643	-0.0205629	-0.384295	0.502587	0.492882	-1.02511	-0.457123	-0.498675	0.215697	-0.0856521	-1.20575	-1.77944	0.0537684	-0.879588	0.242372	-1.07885	-0.138564	-0.126485	0.306901	0.0233438	-0.304775
DCST1	-0.513348	1.00547	0.381058	-0.506317	-0.784051	0.151559	0.684408	-0.0172477	-0.0434794	0.238026	-0.211801	0.682125	-0.242774	0.53445	1.76996	0.712654	-0.687898	-0.914048	1.37887	-0.288785	0.930638	0.112322	-0.0387988	0.0871663	0.916058	0.545614	-0.331479	-0.751799	0.565319	-0.36624	-0.740049	-0.384325	-0.959065	-0.00626612	-1.00422	-0.32865	1.06735	-0.565015	-0.434213	1.17596	0.00626612	1.0724	-0.464995	0.342682	0.0857158	0.621526
GPR26	-0.446209	-0.996843	0.483685	2.96607	-0.187103	1.74249	2.32542	-0.0392237	0.689199	-1.13448	0.0392237	-1.37692	3.86938	-0.55656	0.47675	-1.10737	0.511672	2.7045	1.86695	2.60626	-1.90931	-0.387249	1.01924	0.562428	-0.688121	-0.418046	3.1375	-1.06123	-1.03355	-0.982004	1.09366	-0.377983	-0.378387	1.85784	-0.834305	-1.18363	-1.38457	1.25286	0.127388	-0.356176	-1.40653	-1.70125	2.47795	0.610595	0.307966	1.38703
CSNK1G2-AS1	0.034765	0.172556	-0.036711	-0.361719	0.182269	-0.29797	0.379112	-1.89342	0.0127404	-0.572126	-0.563156	-0.238704	-0.653153	-0.478552	0.526902	-1.68777	-0.0869405	-0.182021	-0.150971	0.678472	-0.454947	0.788807	0.32961	-0.455419	-0.171101	-0.0423634	0.128419	0.212471	-0.262591	0.0736439	0.917519	0.75001	-0.0727203	0.423068	0.528511	-0.152008	0.431593	-0.213622	0.530888	0.0590684	0.686116	0.224541	-0.488304	0.701656	0.0420115	-0.0127404
ZSCAN10	-0.0312285	2.78532	0.682578	1.00358	-0.186397	1.9603	-0.0704718	0.334466	0.783795	1.80364	2.25095	-0.705827	3.14801	0.774849	0.562443	-1.05496	1.36627	-0.0869775	0.0650949	0.72703	-0.175179	0.102602	-1.09715	-0.648081	0.288107	-0.196052	-0.821538	-1.25674	-0.913176	0.0288949	-0.680688	-0.681393	-0.964671	0.497144	-0.0288949	-1.10409	-1.29164	0.167161	-0.461589	0.433909	-1.33894	2.55338	2.73437	-0.293575	-0.175242	2.34557
SAMD3	0.424935	0.954662	-1.74057	1.20578	-1.79843	-1.01077	-0.232451	-0.0250392	2.63683	0.901106	-0.00429392	0.0042944	0.391147	1.10886	-1.80708	0.101256	-1.79688	-0.337091	-2.11871	-0.446899	-1.8992	-1.99939	-2.07294	0.396868	0.970467	-0.861677	-0.859777	0.513866	-0.883572	0.680777	-0.469177	-0.0150824	0.873653	0.972443	-0.721464	-2.18071	1.00247	-0.209526	0.0398545	0.837206	0.317362	1.46102	0.110672	-1.50283	2.24897	0.960138
GOT1L1	-1.94734	-0.736543	-0.291809	0.342052	-1.86142	-3.70786	-1.99273	1.19467	1.56867	-1.13649	-1.49839	-2.56545	-1.39353	0.910222	1.20169	-1.20899	0.829901	-2.28879	0.0523238	-0.0523238	1.59159	0.0848107	1.71561	1.05825	1.09106	-2.05812	1.70304	1.3339	1.2656	-0.657323	0.0836773	-1.78512	-0.701492	1.34233	0.624956	-1.53003	0.353485	-1.83827	0.908057	-2.25871	1.62012	-1.1496	-1.15873	1.2671	1.46702	-1.19082
C10orf91	-0.0228062	0.146902	-0.364417	-0.308366	0.917247	-0.740916	-0.276523	0.725623	-0.520782	1.43953	-1.47565	-0.29532	-0.122632	0.183928	2.67833	-0.383042	0.576808	2.24881	0.20503	2.70148	2.95768	0.702929	0.636598	0.281286	-0.832388	0.159629	-0.109686	-0.502024	3.30129	-0.486683	-0.8872	-0.900462	0.271375	-0.113409	0.488593	-0.763892	-0.496774	-0.0532999	-0.791473	0.0994139	0.0228057	0.334315	-0.157679	-0.402746	0.72092	0.485649
ZNF99	-0.264451	0.289714	1.58813	-2.77449	-0.466193	1.12466	0.0125871	-1.33718	0.470982	-1.30143	-3.82123	-0.0125866	0.333395	-3.78682	1.99389	0.187009	-3.65302	0.30534	-3.12189	0.498679	-3.53736	0.632257	-3.92095	-0.665308	0.333505	-1.65047	1.01265	1.44722	-0.334379	0.802777	-3.1015	-3.78162	0.366242	-0.262061	-1.68987	-3.82521	1.15077	1.1973	-2.91475	-1.10771	1.07539	0.334351	1.92908	1.31744	0.23685	-1.42581
CFAP65	-1.76894	0.338045	-1.17796	2.30172	-0.350505	-0.90512	-0.708641	-0.386404	4.75864	0.483376	-1.78932	2.73621	-1.35299	-0.0798731	0.910457	-0.25474	-0.983372	-0.227179	2.41351	-1.00461	-1.60539	-0.897079	3.10483	-0.858807	2.45345	1.91001	2.55151	-0.391111	0.020586	0.854347	2.04949	-0.0205855	-0.619261	0.517978	2.99789	-0.0488167	-1.11137	1.13515	1.3374	-0.299611	2.03351	-0.854718	0.462147	0.613579	0.310951	0.606099
SIGLECL1	0.489866	0.727505	-1.71736	0.247746	0.413484	-2.513	-1.5078	-0.0989017	1.34033	0.472161	-0.142974	0.758709	-2.76265	1.06333	1.02065	0.386745	-0.0981913	-0.0100188	-0.45398	1.21405	-0.629252	0.0100188	0.062768	0.536034	-0.965682	-4.31785	-1.06563	-0.155715	0.157903	0.42294	-3.71109	-0.0961566	-3.04745	-2.14394	-0.628061	-0.421216	-2.12958	0.578339	-0.476625	0.687947	-0.369113	0.366023	0.61143	1.74962	1.34172	0.537682
LDHAL6A	-0.53544	-0.151176	-1.22132	-0.165442	2.9261	-0.544928	-0.399392	-0.0875206	2.49111	-0.360391	1.1625	-0.270436	0.161624	0.409671	0.515116	-0.465015	-0.451027	0.319324	-0.134832	-0.286713	2.13809	0.191506	-0.00693321	0.401566	0.115344	0.190931	-0.634324	0.38608	-0.721969	-0.844355	0.650795	-0.827838	2.08341	3.40245	0.00693369	1.96885	-0.0202708	-0.616198	-0.603704	-0.947142	1.91221	2.58831	-0.723764	0.348869	2.76545	3.1247
MRGPRX2	-0.993871	-0.151203	-1.83827	0.0638504	1.72724	0.211731	1.02904	-0.0638499	1.83045	-1.9152	1.07552	-0.92789	-0.864831	1.2907	0.302214	1.89085	-0.135165	-0.690303	2.39277	1.02494	0.388589	-0.162321	-0.723146	-0.820385	1.60312	0.894919	1.93174	-1.10917	-0.599071	-0.610631	-1.44899	1.41573	0.398737	-1.07973	-0.241703	-0.767585	0.647446	1.45581	-0.54252	1.05036	-0.209131	1.81464	0.759064	0.385283	-0.731193	-0.475008
NTN5	-0.247959	0.948828	1.5176	-0.489174	-0.22638	1.75735	-0.291159	0.383087	1.20331	-0.831741	-0.247001	-0.321434	0.830414	-0.527344	0.227782	-0.184797	-0.651193	1.84654	-0.00636911	0.578253	2.49321	1.10957	1.27821	2.14743	1.06556	1.83793	-0.546057	-0.521224	0.769966	-0.730723	-0.903321	-0.438277	-0.686502	1.53389	0.388582	-0.883925	0.00636911	-0.514945	-0.396709	0.366575	1.35014	-0.777599	0.731897	0.818435	-0.106346	-0.583875
KLF17	-0.0549235	-1.98415	0.513865	-0.392065	0.0816731	-0.0221329	0.556849	0.131865	0.0330734	0.781571	-0.014122	-3.18846	0.233533	-1.91185	0.775991	-2.39567	0.0697689	-2.05311	-0.424288	0.276323	0.620391	-0.21924	-0.721799	0.828274	0.409029	-0.230712	0.014122	0.120419	1.0402	-0.210869	0.227187	0.390818	0.573175	-1.03529	-0.754694	-1.83018	-2.20069	-2.73367	0.349329	0.480677	-0.485749	-1.66931	-1.5909	0.534453	1.26522	-0.0849731
CCDC105	0.702555	0.378646	-3.32389	-0.213664	-0.680965	-0.0185308	-1.73239	1.44476	0.839388	0.922716	0.755475	1.17174	-1.45852	0.956611	1.45732	-0.803356	0.60707	-2.86598	-0.176987	-0.536627	1.76896	-3.24822	-0.511061	0.739127	-0.671199	-1.8231	0.602089	0.306223	-0.242857	1.24277	-0.00363731	0.00363731	-1.01148	-1.95459	-0.581126	0.389508	0.355155	-0.473878	1.12194	-1.67532	-0.497061	0.831357	-1.71366	1.80648	0.915924	0.154422
CCDC122	-0.950034	-0.720953	-0.246227	0.443046	-0.0175457	-0.320561	-1.83139	0.904643	0.00243092	-0.615011	1.85525	0.189258	0.369347	-0.0869141	1.33891	0.604565	0.649763	-0.791491	-0.584021	0.447978	0.112087	-0.115323	1.35441	1.16529	-0.717228	-0.170115	-0.0576458	0.625054	-0.741559	-0.00243092	0.118062	0.675262	-0.393987	-1.05595	0.0309458	0.352118	-0.618635	-0.0277743	0.0525632	-0.676976	0.120267	-0.826267	-3.07217	1.10096	0.00488973	1.38613
C11orf42	-0.686716	-0.119907	0.802774	-0.219847	-1.21058	-2.70539	-0.260626	1.24813	-0.792711	-0.0303626	-0.38799	0.35567	-1.5669	-1.82155	0.66932	-1.72442	0.300477	0.138066	-0.491627	0.824605	-0.3756	-0.0654998	-1.06858	0.209497	-0.122944	-0.612063	0.192088	-0.58833	0.457099	0.077476	0.778336	-0.441877	0.348776	0.408458	0.0851192	0.0303626	0.427032	-0.170446	1.71337	1.41991	0.852845	-0.371267	-1.48216	1.04144	0.134481	0.387986
DKFZp434L192	-1.99274	1.31942	3.04652	-0.102226	1.463	0.102226	0.739512	0.399006	-0.537857	0.941316	1.25586	-0.284939	4.03431	0.818564	0.777427	-0.436963	0.537458	0.224181	-1.0536	0.205569	-0.365996	0.692306	-0.569267	1.46545	-1.19868	-0.465346	-0.907604	-2.07007	-0.519404	0.730887	-0.578801	-0.489884	2.563	-1.46109	-0.701984	-1.46644	-0.571169	-0.924664	-0.773286	-1.30631	-1.30768	0.249611	0.13445	0.411546	2.58506	0.499186
ZNF486	0.108815	1.32586	-0.331292	0.0918713	0.0916662	0.168989	-1.04533	0.196743	0.472262	-1.05102	-0.30393	-0.3655	0.155582	-0.507553	1.13559	-0.251323	0.452024	-0.256906	0.0540442	-0.226915	0.215182	0.33924	0.383872	-0.482562	0.0664077	-0.562351	-0.223819	-0.173797	-0.117499	-1.47484	-0.902888	-0.513834	-0.205176	-0.683289	-0.0540442	0.478056	0.559748	0.234621	0.458082	0.505795	-0.827864	-0.915116	-0.714625	0.330552	1.2059	0.599248
EXD1	-0.776729	1.66884	-0.794536	0.735959	-0.206053	2.69945	2.39395	-2.08023	0.820504	-1.44585	-1.20721	-0.0771313	3.39744	-1.14013	0.592684	0.0771308	1.41423	-0.736146	-0.364825	2.81826	2.27544	-1.35319	0.335636	0.691467	-0.213118	1.41524	-0.941204	-0.439536	2.38231	-2.30339	-1.60538	0.145035	-1.36627	-2.51726	0.860219	1.36189	-0.455251	-2.46039	0.553493	0.167109	-0.461464	-0.317482	0.819437	2.18266	-0.371124	0.108749
NBPF4	-0.538946	0.00858665	0.802674	1.95908	-0.382246	-1.46031	-0.734494	0.81516	-0.0791919	-0.194868	1.00012	0.0889504	1.8086	0.319419	-1.21937	-0.28344	0.391202	-1.61875	-1.96064	-0.548202	-2.91361	0.114134	-0.477061	2.81882	0.356852	1.06214	0.0445516	-1.62731	-0.177336	-1.03459	0.673805	-0.309866	1.4139	0.445373	-0.548073	1.70369	1.48441	1.50267	-0.165527	2.25036	-0.00858665	-1.13283	0.733261	1.68842	-0.46591	-0.107966
ZNF663P	1.16795	1.52261	-0.0909615	-1.68713	1.0998	-1.65316	1.86551	-1.45835	1.58844	-0.516855	0.247999	-0.320219	1.89647	0.0371938	-0.207654	-0.24895	0.610714	2.35199	2.46857	-0.4084	0.311128	-0.0371938	-0.115768	2.86514	0.0514393	-2.33241	-0.478187	0.432507	1.5441	0.475667	0.302796	-2.17773	-0.703498	-0.0925512	-0.405562	0.078618	-0.986381	-0.372053	-1.05595	0.138381	-0.180681	1.0719	2.62234	-0.39695	0.364528	-0.404431
LINC00955	-2.08725	1.10099	-0.65106	-1.92504	0.172227	-0.756679	-3.09632	1.11255	1.89094	0.174116	-1.03069	1.07104	0.643084	-1.18865	1.09532	0.521137	0.978925	0.39835	-0.135186	-1.97386	1.20563	-1.20654	-2.61901	0.324	-1.5406	-0.557218	-0.434473	1.26687	0.958599	0.716902	-1.69427	-2.80885	0.354343	-0.0435996	-1.91732	0.633129	-1.07581	0.773498	1.11613	0.818559	0.0436001	-1.14623	-1.31742	-1.07198	1.08465	-1.71034
LOC162137	-0.891453	-0.152856	-0.0935941	1.75513	0.962774	-1.35911	0.614835	-0.630575	0.254283	-0.96534	-1.0283	0.561108	1.29576	0.641803	2.21594	0.0935941	2.06156	0.672067	0.744128	0.520514	1.59734	-1.98694	-2.16171	0.787262	-1.69529	1.40953	-0.152841	-1.48884	-2.36575	0.142261	-0.269759	-2.68415	1.52252	0.885805	-1.79242	-0.370352	-1.10686	-1.39302	-1.91312	-1.3222	0.893113	-0.201204	2.70033	0.996592	2.43844	-0.143109
C10orf126	2.71145	1.41536	-0.111451	-2.28591	-0.100524	1.91648	-2.13588	1.87116	-1.99437	1.91052	-1.12015	-0.932449	-1.39374	2.03862	1.97276	-1.76853	-0.206371	-1.73642	-1.46912	-2.02394	-0.456236	-2.49122	-0.0653	-1.81144	1.62915	2.31851	-0.0246267	-0.621201	2.99022	-1.33019	1.91738	2.35688	0.908361	1.19774	0.922475	-2.37477	-0.635085	2.32913	-1.09327	0.267123	2.31576	0.109542	1.77281	0.0321069	0.117589	0.0246263
LINC00479	-0.288156	-0.00886536	0.597374	0.470085	0.685298	-0.732988	0.0407643	-0.135051	-0.730697	-0.00680924	-0.586021	0.948735	0.244452	1.24327	0.619028	0.280164	0.0865841	-1.01757	0.663124	0.00680924	0.14314	-0.520859	0.734208	0.454042	0.0554891	0.362812	0.0194445	0.161282	-3.1314	-2.58685	-0.360157	-1.08292	-0.164868	0.403449	-1.98205	-0.12676	0.702563	-0.612638	0.541103	0.974546	-1.20712	-1.46916	-1.59414	-2.71297	-1.90173	-2.23887
C9orf62	-0.196844	1.26784	-1.98381	-0.615782	0.167844	1.08392	2.01483	0.589919	2.38054	0.825025	1.13378	-1.28304	0.0792713	1.66449	-0.118434	-2.40965	-1.25344	-0.721995	-0.310881	-0.941163	1.58577	-1.04454	-2.21948	0.751194	2.14174	1.48703	-0.0792708	1.59957	-2.49966	-2.1141	-0.0927396	-1.9312	0.812513	-1.07343	1.41698	0.510714	2.19454	-1.92735	1.78296	-0.953454	-0.837367	0.205862	1.22644	-0.853604	-0.488479	2.06527
SLC22A24	-0.00745177	0.443149	-0.0614216	-2.01234	-0.047724	-0.441536	0.467105	0.609169	0.302843	-0.968097	-1.00248	-0.721709	0.457004	-0.155664	-0.0230749	0.715177	-1.07428	1.14479	0.970578	-0.0757906	0.795906	-0.107749	0.00745177	-0.584172	-0.461101	-0.125472	-0.319307	-0.0671904	0.64775	0.243806	0.482972	0.455839	-1.80661	-1.90817	0.106576	0.224388	0.021106	-0.328672	-0.302041	0.607013	-0.282837	0.321516	0.0820086	1.05623	0.138191	0.315726
FMO9P	1.07894	-0.624473	-0.509943	1.20078	-1.54476	-1.45247	-0.992029	0.512037	1.69388	2.49785	2.05827	-0.560543	0.207672	1.83138	0.109567	-1.59023	-1.49865	-1.82428	2.87835	1.38403	0.788125	-1.56595	1.25842	0.69874	0.268899	0.550566	-1.0904	-0.23773	-1.74236	-0.230352	-0.0241542	-0.760675	-0.0549569	0.0241542	-0.717624	-0.0361285	-0.467176	-1.55255	0.294472	-0.700584	2.56036	-0.491373	0.266298	0.605585	2.94747	0.598105
C7orf33	-1.31113	0.297612	0.337765	0.247291	-0.0298982	-1.41057	-0.0330086	0.119671	-0.992489	-0.799812	-1.64206	0.138449	-0.227547	-2.79121	0.417202	0.302245	-1.57873	0.345646	0.199417	-1.33773	-2.67938	-0.750273	0.349395	2.15642	-1.91829	-1.34409	1.27705	-0.0732503	0.143469	-1.30591	-0.08002	1.04498	0.180509	0.455916	-1.02617	2.29469	0.0298986	0.699451	2.1001	-0.365757	-1.70836	-0.425233	0.435117	-0.997452	0.788026	0.13951
ACER1	-0.728095	-0.735337	-0.735126	0.439625	-1.07662	-0.822498	0.558796	-0.319561	0.802661	-0.734443	-0.121514	-0.780702	0.576225	-1.39753	-0.247113	-0.374951	1.08417	2.41556	0.095654	1.35338	-0.742674	0.0191693	0.38412	0.542632	0.647831	0.240762	0.333059	2.11295	0.591504	-0.719596	-0.288568	-0.226753	0.403643	0.43331	-0.453506	-0.530258	-1.54924	0.24041	0.611136	0.00961542	0.185469	-1.02172	-0.646254	0.680893	-0.00961542	-0.314447
TAAR1	-0.0235891	-3.27609	1.13964	0.437187	1.03028	-2.57964	-0.673521	-3.03765	1.7258	0.863691	0.581078	1.53346	-1.46813	0.404206	-1.3609	-0.919452	1.77838	-0.579485	-2.42614	0.0235896	-2.36173	1.11835	-3.51377	-2.79598	-0.203661	1.27613	1.12772	-0.184523	-1.65776	1.51251	-2.44162	1.25063	0.586115	-0.48635	-3.46565	-0.715681	4.70883	0.675053	1.39634	-2.06306	0.991405	-1.45208	1.99823	1.06162	1.74121	-1.01864
OSTCP1	-0.478333	0.461164	0.37452	1.12519	0.510843	-0.842444	-3.82208	-0.229188	0.751237	-2.1284	0.567503	-3.13782	0.664093	0.223168	1.13572	0.295556	-2.07886	-0.380967	-2.62037	0.72305	-1.13805	0.263391	0.598958	1.00168	-0.632089	0.363513	-0.0739265	-1.29664	0.0484109	-0.10215	0.906633	-0.599044	-0.0484109	-0.698782	0.917844	0.608075	-0.164593	0.0760102	-1.49925	-0.19522	0.416015	-0.407288	-0.116771	-1.65668	1.07541	0.6203
LINC00305	-1.54861	-1.35649	-0.571622	1.26968	-1.11778	-1.36312	1.87055	-0.515798	3.08271	-0.329409	-0.736606	1.70363	-0.472142	-0.847827	0.28047	1.25375	-2.63867	-0.99508	-1.06529	-1.66442	1.1976	0.818551	-0.0550432	1.4029	2.50203	0.833091	-0.173081	-2.18899	2.36518	1.69268	0.294138	0.0777316	2.01128	-0.244077	-2.01648	-1.5957	-0.326436	1.11914	1.89987	-0.310772	1.50939	1.27642	0.0550427	0.832602	-0.706607	0.127957
BFSP2-AS1	0.0501742	-0.468798	-0.065567	3.02416	2.06379	-2.00254	-2.55803	-1.16953	1.1456	-1.69109	0.596008	0.08704	1.29765	-0.731372	2.21767	0.099124	1.18711	2.7592	-2.0142	0.866002	2.05792	0.639847	-2.30179	2.30274	1.80661	-0.322192	1.50231	-0.783075	-0.221413	-0.282719	-0.56284	-0.538419	0.834942	-2.72667	-1.00183	-0.0501738	-0.635463	1.96334	-1.70316	0.41522	2.60897	-0.894055	0.480379	0.2136	-0.580536	-0.285388
LOC171391	-0.0449061	-0.524528	-0.0652175	-0.0074892	0.261321	-0.0547647	-1.09589	-0.98208	-0.699801	-0.526324	-1.58684	0.309134	-1.50923	0.0074892	0.606959	0.42928	0.114037	-0.680582	-0.337611	0.461518	0.319157	0.589527	0.0916452	0.64558	0.365956	0.0313535	0.395927	0.139106	0.77977	-0.0628505	0.212527	-0.703361	-0.12377	1.18664	0.174679	0.78873	1.25507	0.971417	0.757488	-0.420019	-0.627859	-2.20663	-0.761687	-1.75609	-0.305083	-1.50796
GPHB5	-0.263533	0.169914	0.133923	-0.157764	-2.18832	-0.669062	0.348491	-0.414788	1.15549	-1.76278	0.237652	-2.0091	0.823504	-1.46927	0.593919	0.342936	0.675518	-1.4298	-0.0208192	0.739406	-1.10975	0.0343652	-0.403114	0.360147	0.0208192	-0.227312	0.744323	-2.26505	-0.249927	0.418783	-1.18507	0.270313	0.62562	0.183781	-0.12129	-0.373433	-1.98145	-2.26815	0.60348	-2.05305	0.546839	-1.54171	0.0931921	0.912579	0.713479	-2.33021
DCD	-0.510541	0.00252008	0.668201	2.51106	-0.147542	0.557946	0.747092	0.0807209	0.530923	1.29854	-0.506946	0.394385	0.678273	-0.200881	1.0073	0.68387	-0.246151	0.536285	-1.62278	0.107539	-0.0824113	0.0389957	0.447323	0.664578	-0.106829	-0.365423	-0.266489	1.69328	-1.14835	-0.615302	-1.16486	-0.350749	-0.228613	-0.156957	-0.408697	-0.97309	0.00658274	-0.593331	-0.624824	0.80219	0.315346	-0.00252008	0.360988	0.82546	-0.610248	-0.414219
IQSEC3	-0.261195	0.592335	-1.05734	0.326466	-0.0625682	-0.817388	2.7842	0.167288	3.28897	0.11844	-0.116011	-0.191892	-0.00293684	-0.935225	0.374353	0.237025	0.161466	2.3368	0.399555	0.362964	0.414849	-1.06818	-0.164462	-0.461091	0.685663	0.11887	-1.54115	-0.382126	0.331207	-0.105487	-0.834251	-0.578358	2.3325	0.296958	-0.384145	0.00293684	-0.236588	-0.719284	-1.39691	-0.244468	1.094	0.198323	0.341408	-0.631732	0.366028	-0.0630012
PPP1R21	-0.250966	0.199971	0.541193	0.0982399	-0.253736	-0.0592432	0.472552	-0.220675	-0.248263	-0.472453	-0.0184021	-0.226233	0.255628	-0.0481272	0.0169773	0.408681	0.243803	-0.10162	-0.496184	0.251442	-0.155219	0.1841	-0.110406	-0.515554	0.125839	0.414028	0.335119	0.0488768	-0.182398	-0.115095	-0.0294991	0.387074	-0.225273	0.0766306	-0.395848	0.117145	-0.293693	-0.0327511	-0.0169773	0.735886	-0.208261	0.324247	0.596813	0.414989	0.731895	0.799164
TMEM237	-0.0223227	0.159719	-0.832104	-0.765024	0.176306	0.434349	0.913629	-0.431822	-0.108508	0.425193	-0.10334	0.475347	-0.938358	0.696627	-0.0450954	0.107098	0.207836	-0.926873	-0.00775909	0.138032	0.145391	-0.817683	-0.228685	-1.02211	0.228719	-0.0796814	-0.491794	-0.361071	-0.405417	-0.32182	0.00775909	0.581905	0.164742	-0.326115	0.242732	-0.540119	1.16511	0.799724	0.790298	0.095603	-0.278642	1.03014	-0.306377	-0.53099	0.223018	0.418904
ZNF564	0.468445	0.186504	0.323885	-0.110147	-0.701179	-0.149308	0.169359	0.0665593	0.327116	0.44934	-0.327658	-0.0764842	-0.201923	0.67135	-0.279077	0.278519	-0.509289	-0.0680985	0.0703759	0.0998693	-0.376204	-0.82758	-0.506629	1.56146	-0.22537	0.121535	0.336987	-0.102391	-0.0900388	-0.0394874	-0.0382094	-0.607916	0.214359	-0.863143	0.226306	-0.108962	-0.00383329	-0.0400672	-0.0557942	0.189238	0.342517	0.00383329	0.443084	0.51996	0.0969815	0.21417
RHOB	2.59802	1.09635	-0.349708	-1.2552	-0.273186	0.764405	0.240371	-0.867845	0.526086	-1.07715	0.112543	-0.623927	-0.358469	-0.655363	-0.0316958	-0.657129	-2.25505	1.38692	0.967218	0.00918817	-0.180738	0.733428	0.896779	-0.525094	-0.537054	-2.21254	1.2959	0.658803	0.862397	0.370307	3.02992	1.17522	-0.919057	-0.107572	0.0578194	1.03326	0.948353	-0.125423	0.457242	-0.394089	-1.41036	-0.427407	1.41608	-0.0203562	0.833551	-0.00918817
SPINK6	-0.230141	-0.0131693	-0.128668	-0.828949	0.0238786	-2.73662	0.919301	0.123385	0.0796494	0.302667	-1.03266	0.441364	0.138659	0.840524	-0.177089	0.329092	0.242418	1.0778	-0.605949	1.33535	0.0132403	0.542537	0.447897	-0.189279	-0.319175	-0.20831	1.85608	-2.62593	-0.450019	-1.62094	-0.101336	0.0727701	0.188748	-0.156723	-1.29164	-0.754198	-1.0539	-0.223119	0.17951	0.0131693	-2.61381	-3.59773	0.575301	0.890316	0.204141	-3.59976
BORCS8	0.660843	1.02721	0.333892	0.210557	-0.0542431	0.16574	-0.241226	0.357704	0.609274	0.170391	-0.321413	0.229487	-0.13795	-0.0153646	-1.04499	-0.48106	-0.482274	-0.442525	-0.0622377	0.0507202	-0.217759	-0.192563	0.025918	-0.381186	-0.209637	-0.680245	0.169354	-0.0970211	0.210342	-0.105365	0.0592432	0.0219126	-0.173772	0.161702	-0.30195	-0.128532	0.48425	-0.256039	0.0153646	-0.308425	0.237319	1.2023	0.462682	0.246043	-0.276957	0.357272
ZNF121	0.380498	0.159438	-0.433522	-0.186319	0.112939	0.348171	0.0972009	0.161294	-0.301994	0.209511	0.120772	0.565068	-0.289807	0.813198	0.414231	0.968043	0.0369306	-0.502208	0.138369	0.0781608	-0.916535	-0.760927	-0.350733	-1.05111	-0.490636	-0.0369306	-0.473462	0.234339	-0.440934	-0.101994	-0.777889	-0.806392	-0.1666	-0.639617	-0.148923	-0.86546	0.156921	-0.202363	0.243156	0.0523295	-0.488032	0.342433	0.749962	0.665357	-0.112838	0.908702
RAB7B	-0.462667	-0.726458	0.685058	-0.877019	1.16539	-1.12063	-0.370566	-1.41607	1.27611	-1.22321	-3.04133	0.614608	0.176118	0.989165	0.730072	0.219757	-0.159302	0.912361	-0.303448	0.490354	0.111107	0.924953	0.412086	-0.397714	-0.028579	-2.41967	1.03639	0.725455	-0.750629	-0.399523	0.305397	-0.170909	0.132517	-0.152703	0.162571	-1.37262	0.0596406	-0.399214	-0.761697	0.585419	0.028579	-2.8868	-0.355448	0.845885	0.0699217	-0.368187
MAPKAPK5-AS1	-0.262408	0.776872	0.964818	0.177206	0.0746937	0.173162	-0.310254	0.389823	0.396888	-0.0407085	-0.0788422	0.0704641	-0.042511	0.259657	0.288561	-0.291178	0.296993	0.029211	-0.329446	0.000508	-0.000508	-0.243894	-0.0155964	-0.276576	0.0231724	0.0852222	-0.228697	-0.257419	-0.0166521	-0.00537395	-0.248912	-0.128345	-0.242472	-0.369724	-0.0669947	-0.179066	0.460175	-0.389596	0.0689268	0.56471	-0.216815	1.07067	0.432894	0.529089	0.285207	0.901676
ATP6V1C2	-0.0756206	1.47245	0.638255	0.743099	1.22814	1.09674	-0.829944	0.528856	-0.368571	-1.33826	0.418473	-0.996367	-2.27092	-0.578271	1.23247	-0.030858	1.30011	0.664291	-0.776172	1.20411	1.53273	-3.86047	0.931828	-0.492612	-0.547263	1.07635	-1.46499	1.13061	-0.0720348	0.439601	-0.480568	1.19442	1.11043	0.405761	-0.0264268	0.985755	-1.95638	0.421587	-0.0502963	-1.17382	0.0264268	0.356349	-0.161536	-0.30541	-0.94524	-4.4225
BRICD5	-2.41498	0.60765	-0.299386	0.270289	0.612254	-0.554508	-0.157893	-0.897261	0.360976	-0.43213	0.312645	0.181986	0.293974	0.425544	1.31683	0.824773	-0.195648	0.729926	0.280152	0.251759	0.762119	-0.789702	-0.488693	1.3197	0.600074	0.0172551	0.21641	0.31849	0.484715	-0.234424	-0.224276	-0.773726	-0.269286	-0.875119	-0.838866	-0.762778	0.617514	0.13663	-0.452939	-0.367099	-1.45628	-0.0172551	0.0285752	-0.386706	-0.146345	-0.0405943
NT5E	-0.826107	-0.116173	0.898675	0.757745	-0.415467	-0.125976	0.49078	-0.234119	1.15085	-0.00599766	-1.13251	-1.36075	-0.118022	0.697713	-2.37176	0.838114	-0.114905	-0.391509	-0.400395	-1.90139	0.488869	0.273221	0.330075	0.726797	0.769307	0.0605292	-0.156479	-0.576235	-0.364288	-0.533534	0.601714	1.08322	0.103809	0.60075	0.034183	0.00599766	1.88669	0.099781	0.106342	0.527963	0.466543	-2.30902	-1.05477	-0.244356	-0.539733	-0.519278
NDST1	-0.223395	0.683554	0.147888	0.178838	-0.128343	0.0025866	0.322949	0.552841	-0.0948613	1.00648	-0.075948	-0.118785	-0.0877521	-0.423093	0.592865	-0.917795	0.849564	-0.313377	0.568268	0.202101	0.243067	0.204927	-0.0025866	0.379308	0.893126	-0.0208814	-0.0766103	0.186414	-0.735162	0.499532	-0.171648	0.690288	-0.206133	-0.26488	-0.2586	0.359249	0.280034	-0.253971	1.02783	0.00750613	0.124822	-0.16624	-0.16534	-0.478578	-0.770967	-0.329911
CHD2	0.00775528	0.22987	0.155379	0.0424271	-0.297606	1.03636	-0.583685	-0.174797	-0.252647	0.727804	0.260904	-0.00943088	-0.101111	0.151596	-0.257165	0.487169	-0.438107	0.304757	0.000789	-0.663526	-0.123155	0.412586	-0.0362635	-0.345973	-0.000789	0.407768	-0.017374	-0.719377	-0.641208	0.171315	0.088439	0.226754	-0.512801	0.283009	0.113016	-0.0757275	-0.44839	0.256674	-0.546916	0.398139	0.190302	0.349648	-0.0746613	-0.833255	-0.283988	0.539681
USB1	-0.112447	-0.163727	-0.949973	0.0177016	-0.166645	-0.370018	0.631455	0.533205	0.384799	-0.288176	-0.516913	-0.114483	-0.166096	-0.0949845	-0.361502	0.104212	0.0182509	-0.0177016	-0.11648	-0.427289	-0.041409	-0.155607	0.29286	-0.190373	0.147595	-0.261792	0.159197	0.198278	-0.606098	0.665987	0.757079	0.520903	0.864912	0.939835	1.02735	0.926462	1.2777	1.06139	1.14758	-0.27369	0.86135	-0.624044	-0.262514	0.0192451	0.245742	-0.557212
GPNMB	0.436217	-0.907981	0.852244	-0.390403	0.249545	-0.815101	-0.957914	-0.694104	-0.00541711	-1.9485	-1.12759	1.24263	1.0499	0.561712	0.00541711	-0.0531027	-0.280401	1.34765	-0.404299	0.318199	0.752918	0.540846	0.40886	-1.05225	1.35486	-0.497796	2.88674	1.08246	-0.444397	0.915729	0.220325	-0.339419	1.96497	0.507291	-0.820444	0.545303	-0.340484	-1.96477	-1.2192	0.994698	1.12628	-0.773737	-0.886453	-0.726599	0.0615599	-1.03009
CEP57L1	-0.600829	0.345278	0.153151	-0.572242	0.0426142	-0.15899	-0.137459	0.187995	-0.152886	-0.294165	-0.506749	0.196295	0.177464	-0.0700409	0.387381	-0.19012	0.750234	-0.237319	-0.0948064	0.363016	-0.615613	-0.0290368	-0.458603	-0.17675	-0.316451	0.166041	-0.235284	-0.126912	0.575689	0.105644	0.492709	0.355697	-0.185498	-0.739485	-0.266633	0.0810168	-0.283737	-0.138086	0.525072	0.188539	0.364385	0.451953	0.464234	0.824243	0.724351	0.0290368
CCDC13	-0.0693731	-0.565028	-1.78434	-0.71525	2.19838	-2.32919	2.80897	0.875789	2.86666	0.461994	1.41904	-0.406457	-1.00503	0.23942	-0.384478	1.3639	3.15402	2.56545	1.83606	1.47042	-1.81016	2.02634	-2.37466	1.57976	-1.22173	-0.492753	-0.797503	0.0693731	1.45059	-1.21924	-1.80978	-1.07529	-0.881263	1.05497	-2.2841	2.20385	-1.96349	-1.09165	1.79032	3.40554	-2.49598	2.30804	2.67714	-0.332556	3.09574	-0.340037
MYO10	-0.402608	-0.187141	-0.376575	-0.520241	0.328624	-1.37948	0.229283	-0.602685	0.0438743	0.461447	-0.12584	-0.443046	0.863041	1.19703	-0.122561	0.468634	0.56538	0.981253	1.06657	-0.416828	1.252	-0.28795	0.610701	-0.281452	0.555472	1.42618	-0.143015	-0.170815	-0.161322	-0.397707	-0.816269	1.55562	-0.0438743	0.20728	-0.799489	0.244622	2.04639	0.104185	0.142393	-0.780536	-0.42179	0.199103	-0.326502	0.0587597	0.101562	-0.808265
ARSB	-1.11474	-0.559011	-0.76289	2.26462	-1.04894	-1.46085	0.728454	1.64302	-0.356761	2.58299	-0.0525937	0.217824	-0.547205	0.095789	-0.194166	0.170622	-0.576073	-0.722439	-0.67795	2.2172	0.131127	-0.587665	-0.157164	-1.12186	0.613703	0.143752	2.03734	-0.00464153	-1.36688	-1.83563	0.353617	2.95646	-0.406952	-1.42504	0.00464153	0.500747	-0.322409	-1.2714	2.31684	1.2741	2.2333	-0.209156	2.89153	0.917048	0.0589151	1.49237
FRMD4A	-0.0152974	-0.302219	-0.575342	-0.368518	-1.29225	0.295743	-0.876301	-1.4877	0.925973	0.381483	-0.892288	-0.0786896	-0.209211	-0.449705	0.382943	0.705022	-0.368678	-0.680744	-0.672843	1.24851	0.98145	-0.296192	-0.729672	0.83949	0.616557	0.136899	0.406826	-1.31367	-0.684516	0.732793	-0.0991302	0.619052	0.986209	0.0152974	0.944047	0.106402	0.655203	-1.29843	-0.792313	0.220599	1.39108	-0.382296	-0.327587	1.57462	1.37555	0.343909
TMEM239	-1.21552	0.93997	-0.464586	0.797438	-0.390519	0.0376866	1.06169	0.923389	0.404731	-0.620067	-0.589305	-0.532237	0.287779	0.0434215	0.45367	-0.164217	-0.389301	-0.127644	1.79e-05	0.446837	0.919078	0.55415	-0.170743	-0.110764	0.291312	0.677482	-0.0422308	0.327339	-0.253349	-2.29284	-2.06438	-1.79e-05	0.382375	0.199311	0.469138	0.562861	-1.24602	-0.0607817	0.368197	0.729766	-2.78959	-0.214976	0.309734	-1.28485	-1.17582	-0.4985
SMPDL3B	0.0552659	0.2425	0.0929971	0.581037	-0.531155	-1.02271	-0.297812	0.104229	-0.155897	-0.556869	-0.425184	-1.43469	0.648323	-0.659424	-0.313035	0.0503926	0.167871	-0.440647	-0.414234	-0.454306	-0.950925	0.0880084	-0.45079	0.134415	-0.0503926	0.300625	-0.380482	-0.195379	0.194463	0.170043	0.124348	0.503754	-0.287126	0.650816	-0.139111	0.794658	0.557925	-0.341732	0.231883	-0.152956	0.16776	-0.363373	0.140081	0.232921	0.547419	-0.116785
CNOT1	0.00143051	0.907173	-0.0750132	-0.80447	-0.608336	0.221232	1.34603	0.496767	-0.518344	0.502275	-0.0823669	-0.00143051	-0.859841	-0.324928	0.544766	0.20988	0.425824	-0.254737	0.471105	0.132834	-0.361407	-0.844028	-0.0143738	-0.100867	-0.411416	0.128618	-1.13634	-0.40801	-0.0635862	0.0348444	0.144316	0.0615873	-0.0338545	0.0145025	0.714255	-0.0698261	0.199264	0.660406	0.878135	0.201751	0.444007	0.450909	-0.286437	-0.129714	-0.159988	-0.248317
ASH1L-AS1	-0.341666	0.935255	-0.0992322	-0.171592	0.231397	-0.443294	-0.285523	-0.834897	0.0878596	0.383205	-0.269059	0.0590129	-0.291668	-0.175481	0.0265708	0.0542245	0.123803	0.26276	-0.00728559	-0.281843	0.0505576	0.291613	0.229319	-0.256748	0.318303	-0.226902	-0.244882	-0.347789	0.196068	0.00728559	-0.407709	-0.352261	0.382542	-0.27457	0.347335	-0.363917	0.418843	-0.242453	0.763898	-0.269024	-0.380752	0.59776	0.152993	0.504639	-0.0280757	0.377288
XG	1.12596	0.766217	-0.571878	-0.134949	0.240108	0.299319	-1.76895	-0.838431	1.2119	0.586791	0.46544	0.865319	-0.655451	-3.36252	0.0518584	0.22611	0.323548	0.111067	-3.95729	-0.119952	1.29059	-2.49226	0.791459	-0.506512	-0.0678272	-1.48997	0.10102	0.7117	0.663256	-0.232594	-0.712515	0.592437	-0.0518584	-2.49872	-0.627579	-0.909781	0.969714	-1.09571	-2.15429	-0.708503	-0.4393	-1.14597	0.211708	0.531362	2.37674	1.13052
ZHX1-C8orf76	-0.485584	1.97849	0.549718	-0.712756	-0.237035	-0.887182	-0.247906	0.387009	0.0461099	-0.530759	0.404199	-0.188065	-0.0529459	0.348099	-0.128561	-0.577421	-0.116937	0.465903	0.664931	0.205426	0.811316	-0.599618	0.455067	0.845588	0.188196	-0.0453942	-0.52168	0.0532286	0.329643	0.0453942	-0.353386	-0.460752	-1.19308	0.148119	0.663377	-0.251139	-0.225338	-0.16076	0.941538	-0.0620506	-0.0597932	0.721153	-0.37908	0.608227	0.486465	1.94309
EPHA8	0.864362	-0.304087	3.90879	-0.0349879	-0.178121	-1.24047	-0.0142927	-0.68978	0.199683	-0.0254192	-0.920113	-1.13863	0.756683	-0.620545	0.514669	-0.711504	6.60665	-0.707338	0.806048	-0.561271	1.11151	0.743308	-1.39541	0.334777	0.693444	-0.634888	-0.93591	0.0142927	0.141736	-0.407927	0.524238	0.526109	-0.342037	-0.668693	0.219896	0.0291643	-1.50121	-1.34042	-1.81792	0.0830717	-0.244829	0.510672	0.397503	0.551582	0.305684	0.889252
DEUP1	-0.671896	-0.999527	-0.386956	2.13238	-1.51145	-0.180375	-0.781961	1.34771	-0.349195	-1.74903	-2.16933	0.632073	-1.37649	2.53148	-0.400382	1.86787	2.38144	1.76687	0.807322	2.45806	-0.708868	0.0194364	1.54927	1.6092	2.46868	-1.0883	-1.65651	-1.22853	-0.227764	0.0655952	-2.19148	2.41996	-1.94891	-1.49608	-0.504692	0.161862	3.01583	1.06992	-1.55006	-0.703928	0.361046	0.306124	-0.0194364	2.70098	0.17538	1.38572
TLCD5	0.258771	-0.927156	-0.018249	-0.329096	-0.499001	0.166677	0.0649562	0.193076	0.762978	0.131954	-0.696312	0.156588	-0.111863	0.117167	0.141745	0.0915141	0.137979	0.450718	-0.423049	-0.570728	0.0954661	-0.121169	0.0136666	0.53833	0.172891	-0.17986	0.00239849	-0.00423622	-0.431411	0.472573	-0.00239849	0.412155	-0.278329	0.138027	-0.559668	0.111134	0.453686	-0.60684	-0.4128	-0.2005	0.131993	-0.712722	-0.896638	-0.0536194	-0.139843	-0.346255
DNAJA3	0.467931	1.09461	-0.006495	-0.173723	-0.275674	0.31565	0.819659	0.852822	-0.348171	0.575091	0.671575	0.006495	-0.590787	-0.452544	0.580966	-0.0429311	0.783737	-0.171823	0.481147	0.335239	-0.0392451	-0.330004	-0.280194	0.689356	0.368668	0.174683	-1.03305	-0.17607	0.443274	-0.179881	-0.5023	0.612331	0.173094	-0.201026	0.520644	-0.223296	-0.180597	0.562644	0.679943	-0.494566	-0.116012	0.454885	0.159123	-0.0513105	-0.108036	-0.192735
GALNT18	-0.493873	0.149867	-0.476697	0.225471	0.121954	-0.937184	-1.00634	-0.167056	0.255334	-0.0348372	0.255793	0.325015	-0.453349	0.0899921	-0.0148177	-1.29467	0.2788	-0.483538	0.0557523	0.612844	0.252115	-0.386487	-0.00434542	0.54878	0.55251	0.519095	0.265707	0.398529	-0.566577	0.120221	0.120018	-1.01426	-0.233505	-0.201682	-0.441581	0.00434542	1.2433	-0.786837	-1.44233	-0.824789	-0.105718	0.0193877	0.0763578	-0.430558	0.377841	-0.827707
CNOT9	-0.334351	1.3233	0.530895	-0.203598	0.166618	-0.212154	1.00879	0.306161	0.410469	-0.149454	0.012887	0.509721	-0.668064	0.534121	0.246086	0.00413609	1.33309	0.160297	0.255786	-0.0659714	0.761091	-0.255707	-0.00413609	0.401156	-0.149242	-0.311157	-0.46074	0.315229	-0.374557	-0.090208	-0.577695	0.23082	-0.638108	-0.0949717	-0.231956	-0.224208	0.60036	0.44457	0.932601	-0.35331	-0.743678	0.531673	-0.219578	-0.149777	-0.155887	0.6345
TUBGCP3	1.37564	-0.130166	-0.4494	-0.829546	-0.36516	-0.571623	0.281153	1.08621	-0.0269778	0.355122	0.587531	-0.202703	-1.11535	1.64256	-0.325824	-0.218257	0.0482008	0.349884	0.50896	0.774852	1.40312	-0.937178	1.34541	-0.238097	0.00399756	0.135664	-0.553266	0.433605	0.564972	0.4639	-1.12427	0.673439	-0.24391	0.261801	-0.0663626	-0.237327	1.6369	0.955343	-1.30187	-0.268066	-0.124572	0.163438	-0.717379	0.349002	-0.569368	-0.00399756
TIRAP	0.207201	-0.868155	-0.611853	0.216889	-0.479218	-0.284864	0.0890174	0.641975	-0.218223	-0.0768771	0.15698	-0.160685	-0.0118623	-0.0548844	0.450041	0.156548	-0.0499711	0.209589	0.0118623	-0.168176	-0.637336	-0.045444	0.062284	0.875696	0.0554881	-0.0996032	-0.208338	0.253734	0.60982	0.16858	0.302358	-0.069365	-0.196538	-0.10794	0.0336108	0.663406	0.0143685	-0.15632	0.101508	0.604704	0.711322	-0.979137	-0.162494	0.207002	-0.258265	-0.0278945
RBM33	0.67546	-0.470407	-0.00909471	0.14426	-0.176237	0.411454	0.0823207	0.296797	-0.328942	0.165857	0.739374	0.362905	-0.837146	-0.382696	1.1725	-0.204836	-0.163809	0.478699	0.472321	-0.636885	-0.0995898	0.0388651	1.03269	1.04763	-0.0150366	1.56413	-0.987999	0.652917	0.423131	0.942356	-0.219869	1.08801	-0.482274	0.213566	-0.806309	0.00909471	0.851805	-0.348515	-0.229759	-1.43257	-0.287229	-0.402392	-0.248281	-0.326542	-0.503397	1.08034
MIR31HG	-0.699132	-0.376321	-0.468567	0.00448895	-0.0928187	-1.11317	0.310267	-0.0471196	1.20372	-1.12255	-0.700372	0.544753	-0.868909	1.03308	-0.097754	0.348572	-0.221621	1.01593	0.244084	0.360178	-0.142314	0.370108	0.440236	0.668209	0.463114	-0.204919	0.00720262	-0.450695	-0.00448895	-0.163884	-0.371603	-0.368194	-0.260233	0.646286	0.0180087	0.274124	0.0999646	-0.640976	0.472273	1.5302	-0.0281944	-0.183437	-0.882845	1.23657	0.478596	0.395435
TMTC4	0.252087	-0.0912452	-0.484403	-1.06971	-0.293056	0.462804	0.166509	1.7156	-2.18207	0.636396	0.883939	0.50675	-0.944956	0.151319	0.0533395	-0.755633	-0.940589	0.357749	0.264105	0.284122	0.414354	-0.853072	-0.0145164	-0.0438647	-0.141209	-0.574171	-0.564281	0.398346	0.561017	0.417288	-0.248322	0.395789	0.186629	0.0436568	-0.384353	-0.570248	0.0145164	0.457085	0.0962653	-0.224551	0.0443683	-0.136599	-0.287675	-0.15552	-0.445466	-0.111073
NBEAL1	0.415463	0.256205	0.956506	0.755083	-0.18648	0.834412	0.308654	-0.194784	0.590611	0.434884	0.0321245	-0.140261	0.93768	0.816685	-0.183822	0.590199	0.722989	0.738243	0.00303555	-0.125381	-0.420664	0.492066	0.238072	-0.174943	-0.078495	0.0937118	1.15706	-0.259057	0.446519	-0.845241	-0.186076	-0.281769	-0.843201	-0.722278	-0.958578	-0.123339	-0.73606	-0.82715	-0.104446	-0.564659	-0.924459	-0.00303555	-0.566293	0.792999	0.621476	0.759211
CCDC60	-1.17495	0.801312	-0.0018487	0.212565	0.35657	0.609131	0.782977	-0.996508	1.19182	0.0018487	0.029356	0.760628	0.776442	-0.847872	-1.21585	-1.64961	0.275453	-0.707682	0.750278	-0.438659	-1.67932	-1.42848	0.7442	0.545985	-1.82201	-1.14435	-0.558249	-1.57298	0.731168	-1.14928	0.190969	0.17792	-0.0655074	-0.799575	0.329535	0.596329	1.63118	-3.25853	-1.2895	0.943779	-0.29704	-0.442467	0.694007	1.70722	-0.793847	-0.0483284
NLGN4Y	-2.54009	2.2084	1.9865	1.20375	1.61071	1.32785	-1.2028	0.935711	-0.59254	-0.230073	1.35273	-1.46392	0.113102	-1.3472	-0.240705	-1.07066	0.849289	1.9655	0.611411	1.25817	2.54488	-0.939651	2.4726	-0.75323	2.18099	-0.635143	-0.497928	1.55935	-1.88879	-0.908366	1.68853	-0.241034	1.25238	-0.724803	0.430176	-1.88607	2.5313	1.49447	-0.792511	-2.1098	-0.915864	-0.21094	2.76945	2.62176	-0.113102	-0.152674
ADIG	-0.930601	3.25402	-0.365897	-0.673387	-1.11256	1.43738	-0.355214	2.7614	3.54809	-0.277913	-0.354078	0.220973	0.734061	-0.563608	-0.0932555	0.150006	0.187147	-0.144331	1.82992	3.0617	0.408814	-0.177452	-0.0644364	-0.667058	2.36836	0.0644364	-0.934727	0.813121	1.87725	-0.631124	-0.729802	-0.696254	0.442917	-0.971387	-0.377138	-1.14916	-0.30827	0.280351	-0.331715	1.58639	1.72184	1.98383	-0.777207	0.377581	0.917412	0.349115
CCSER2	-0.171875	0.102788	0.306242	0.734357	0.0497005	0.00438047	0.675181	-0.00438047	0.506524	1.47289	-0.0750544	0.088536	0.0544136	0.582712	-0.127566	-0.701155	-0.182507	-0.617644	-0.0595496	0.136903	-0.72638	0.00574374	0.249658	-0.137265	0.535938	0.114745	-0.363577	-0.0226614	1.19925	0.339347	-0.0988972	-0.276634	-0.621754	0.386064	-0.0783017	-0.158721	-0.0728333	-0.26787	0.17208	0.437963	0.053292	1.45285	-0.052974	-0.33675	-0.842258	-0.781963
SUGT1P3	-0.624031	0.824951	-0.180575	0.29814	-0.186458	-0.845032	0.206336	0.579353	0.467938	-1.11849	0.441515	-1.52917	0.560719	-0.331001	0.120503	0.0939305	-0.160983	0.412445	-0.12565	-0.072933	-0.709221	-0.413462	-0.320679	0.258561	-0.582683	-0.37904	0.752584	0.549063	0.951295	0.442439	-0.00309253	0.0274937	-0.627846	0.00257277	0.758776	-1.87906	-0.469089	-0.00257277	0.251962	1.12107	-1.29117	-0.404294	-0.0463507	0.570283	0.335014	0.797083
OGDH	0.196865	-1.31453	-0.745639	-0.450625	-1.01543	0.042263	0.570656	0.53708	-0.670404	-0.221577	-0.580061	-0.042263	-0.563295	0.161165	0.175824	-0.178068	0.840669	-0.248062	-0.152036	0.0911951	-0.253073	-0.682235	0.108483	0.188295	-0.41552	-0.281964	-0.116209	-0.441697	0.220296	1.03322	1.25952	1.15462	0.810925	1.27105	1.01977	0.931006	0.913246	1.58147	1.16612	0.912654	1.672	-0.56665	-1.39397	-1.08903	-0.774037	-1.59157
WFDC8	-1.15526	-0.794086	0.000102	-1.19691	0.0622654	3.01496	-0.960598	0.103636	-0.623784	-1.54028	1.77833	-0.958405	1.9579	-0.795087	1.21425	-1.10576	0.431006	1.62328	1.99214	0.372561	2.72171	0.699384	2.29118	-1.00844	1.86263	1.30411	-1.2893	-0.133249	0.972601	-0.417399	-0.000102	0.369579	-2.09117	2.14543	-0.722669	-0.497477	-0.980642	-1.42284	-0.888783	-1.30019	-1.40696	-0.853813	1.63932	0.634861	0.37182	2.42427
ZNF446	0.0875766	-0.478096	-0.0739472	-0.671467	-0.612043	-0.19421	-0.865999	-0.0556209	0.914709	0.530819	-0.0805013	-0.913143	-1.26388	-0.159474	-0.0314276	0.509345	0.227196	-0.976433	0.355947	-0.638515	0.00748086	-0.0225461	0.052345	-0.133441	0.292966	0.094898	-0.47053	0.303552	0.0322759	0.00768638	0.477286	0.0246551	0.0274827	-0.640398	0.912013	-0.607581	0.185333	0.136753	-0.372922	1.25798	0.275299	-0.00748086	0.542439	1.00997	-0.5361	-1.79799
MBLAC1	-0.165765	0.0584338	-0.554653	0.175098	0.109435	-0.134103	0.757138	-0.387738	0.0530751	-0.110661	-0.629919	-1.06789	-0.551648	0.177855	-0.072346	0.062413	-1.14109	-0.544547	-0.469125	0.112931	-2.24775	-0.674207	-2.06514	-0.848868	-1.41724	-0.274209	-0.661467	0.447993	0.403496	0.389901	0.160854	0.248307	0.503372	0.280789	-0.21198	0.295766	1.18479	0.196079	-0.0530751	0.100515	-0.280299	-0.0666039	0.435573	0.244983	0.399582	0.0612872
CD300LB	-1.6716	0.0121729	1.76673	0.547788	2.3451	0.541731	0.213942	0.455906	0.726568	-0.0292437	-0.391747	0.0878332	0.115608	-0.0482028	2.33246	-0.898668	-0.130381	-0.0839093	-0.453241	1.41106	-0.274376	0.458538	1.10792	0.802419	0.119119	-0.819182	2.48556	-1.05439	1.61576	-0.549467	-0.0121729	-0.215217	-0.134017	-0.805214	-0.671327	-0.0797293	-0.476245	0.68671	-0.0452158	0.919434	-1.09561	-0.245189	0.118585	-0.201589	1.74324	0.342526
C3orf33	0.245314	-0.0897238	-0.57207	-0.187744	-0.367955	-0.459536	0.755954	-0.300724	-1.01064	1.07683	-0.498751	-0.238907	-0.471113	0.175312	-0.0252235	0.681326	-0.931327	-0.859553	-1.16962	0.635466	-0.860574	0.368913	-0.114936	-1.86644	-0.567651	-0.0861275	0.100418	-0.146282	0.350211	0.277419	0.219496	-0.202254	-0.00531745	0.445586	0.681256	0.134489	0.501601	0.00531745	0.163686	0.865341	-0.163713	1.4409	1.00566	1.51162	0.0470345	0.74132
LYNX1	0.248903	-0.167596	-0.243884	-0.178361	-1.70833	0.0132566	0.179828	0.570584	2.53988	0.127152	-0.362739	-0.00804138	-0.189195	0.244632	-1.36093	0.125042	0.55856	-0.513247	-2.26092	0.797221	-0.363598	1.59315	0.399897	0.319662	0.779997	-1.05728	-1.38657	-0.330559	-0.0412922	-0.149971	-0.0611067	0.668527	0.00804138	0.274469	0.499876	-0.519389	3.52353	-0.0560527	0.147624	-0.165723	-1.20235	-2.07811	0.776599	-1.8636	0.439729	0.196175
LOC554206	-0.156347	0.185242	0.491454	-0.0178761	-1.53742	-2.14333	0.282033	-0.465054	0.159301	-0.911728	-0.423925	0.0523152	-0.0707703	-0.156291	1.08869	0.0250111	-0.376045	-0.535492	0.15663	0.376284	0.214005	-1.2124	-0.690735	-0.294913	-1.12465	-0.208803	0.0178761	-0.136565	0.287589	0.737355	0.701811	0.467141	-0.355487	0.657053	0.437152	-0.19075	-1.21831	-0.0791731	0.657451	0.641443	0.364892	-0.503599	-0.121056	0.0478399	1.21533	0.927876
C11orf53	-1.11455	-1.43531	0.463847	0.163026	0.729584	0.795236	1.19925	-0.130872	1.26423	0.780008	1.14821	0.251755	0.678381	1.2835	-0.209847	1.38247	-0.186179	0.303801	0.248943	-0.892174	-1.59093	-1.52518	-2.1232	1.49787	0.478265	-2.34828	0.130872	-1.72827	-1.8965	-1.60066	-2.1296	-1.84664	0.460855	-0.151154	1.07083	0.942582	-1.42141	-0.399004	-0.920684	1.8251	-0.247812	-0.686817	-0.556086	0.617978	-2.37958	1.19569
TRMT44	0.286338	0.301275	-0.18472	0.223051	-0.75927	-0.196651	0.298877	0.288619	0.623136	0.32108	0.567477	0.189099	-0.104472	-0.18893	-0.249223	-0.0374153	-0.232135	0.415384	0.0595238	-1.09884	0.174805	-0.403209	-0.192958	-0.526037	0.32549	0.00382113	-0.00698018	0.209438	-0.474154	0.182279	-0.75518	0.14122	-0.0980065	-0.126149	0.551287	-0.417502	-0.156367	0.150219	0.3533	0.234444	0.392015	0.0350254	-0.00382113	-0.734196	-0.571717	-2.59314
C5orf46	0.585089	-0.0825276	2.35945	-1.22048	0.177457	1.81347	-1.65633	0.199044	1.22473	-0.821369	-0.7103	2.3118	-1.15964	1.46297	2.18071	2.93837	2.57688	3.38264	-0.190079	1.92877	-0.828379	0.989361	3.84236	-0.44061	0.0805793	0.269281	1.82322	-0.179223	-0.334874	-0.59841	-0.552937	2.0665	-0.292636	-0.773724	-1.28782	-1.47242	-0.0805798	-1.05575	-0.533518	0.356869	-0.792025	-0.282428	0.237017	0.406214	0.286444	-0.517459
IZUMO1	0.459811	1.71816	-0.374879	-0.999594	-0.293386	-1.71922	0.154683	-1.00675	0.617779	-1.42943	0.14372	2.94433	-0.748136	2.00693	-0.350281	-0.550751	2.24442	2.6627	2.59735	0.127621	1.10455	2.74335	0.485941	0.384141	2.15961	-0.309619	-1.20719	-0.0289345	2.70553	-0.239054	-1.11934	-1.06768	-0.00534153	-1.46465	-0.246046	0.00534153	-1.4357	-1.25935	-0.510807	-1.03221	-1.12934	1.44028	2.6223	3.10664	2.54013	0.668523
SH3YL1	-0.439388	0.529752	-0.644198	-0.595836	-0.731796	1.14281	2.88513	-0.634014	0.129805	2.0086	0.153186	-0.986765	0.565036	-0.452617	1.6212	2.25682	-0.872947	1.25945	2.16456	-0.686131	2.6565	0.2219	-0.483162	-0.545463	1.95069	-0.574719	-1.10305	2.46978	-0.578527	-1.70935	-0.669755	2.20403	2.55085	-0.909758	-0.265605	2.55158	-0.265017	-0.578563	2.39772	2.51668	-0.287168	1.7294	3.51267	-0.729988	1.56329	-0.129805
PTPRO	1.01548	1.75931	-1.35737	2.86099	-1.43691	-1.61378	0.50574	2.30924	2.22597	0.885476	-0.0380263	1.74435	3.00745	-0.889279	2.5312	0.0258994	1.27711	-2.37037	0.645197	-2.30199	3.48734	-0.393866	0.0660033	-1.72287	-0.0591769	1.87225	-1.8524	-1.27855	1.81314	-0.70673	1.58443	-1.73885	-0.045599	2.20192	-0.0258994	-0.65575	-1.69046	1.98543	-1.03919	-1.06178	1.53171	-1.45861	-0.791569	1.24696	-0.744457	1.48766
GRIK1-AS1	-0.423731	0.0868721	-0.177992	0.387395	-1.28417	-3.18775	0.0585742	-1.41204	-0.183959	-1.95731	-2.41396	0.298012	0.208154	-1.19951	-2.87347	0.0113068	0.625128	-0.460746	-0.336214	-1.95859	0.507455	0.108608	-0.946016	0.654314	-0.0113068	0.0450158	-0.0997896	-0.187241	-1.62707	-0.939468	0.356101	-0.751935	-0.242202	0.112382	0.522291	0.567573	0.692662	-1.27033	0.0149455	0.80709	0.719001	0.495599	-0.325012	1.03981	1.63263	0.35863
ZCCHC13	-0.0389318	0.901836	-0.331734	0.903604	3.16634	1.82808	-0.357833	-0.718144	0.471693	-0.34547	-0.288155	0.059186	0.248975	0.394907	0.218078	-0.499016	0.0206227	-0.546338	-0.138603	2.25751	0.848423	-0.645059	-1.02158	-0.422311	-0.330493	-0.228721	1.02391	-0.186754	0.726289	-0.447424	0.0789814	0.114392	0.0501966	-1.23857	0.135389	-0.427515	-0.170398	-0.33013	0.023551	-0.0206232	-0.826616	-0.467968	2.43161	1.27036	0.143367	0.438515
KCNS2	0.51623	0.459124	1.3212	-0.0747972	1.05069	-2.56868	-0.469292	0.847677	2.41254	1.52522	0.919941	1.30304	-0.856092	0.748782	1.54687	-1.70977	-0.961092	0.795023	-1.09752	0.0493631	0.859518	1.14526	1.88	1.5197	1.19021	-0.673753	1.19807	-0.410388	-0.170851	-2.08921	1.67667	1.09025	-1.0831	-0.971042	-0.919444	-1.1455	-0.627659	-0.969677	-0.511295	-0.143309	0.313503	-1.7734	-0.0493631	-1.0079	-0.374082	1.33918
VPS50	0.276104	0.670205	0.260886	-0.213652	-0.315797	0.131664	0.100142	-0.108334	-0.0200548	-0.554648	-0.07341	-0.297774	0.179065	-0.565855	0.389507	-0.377482	0.0200548	-0.391887	-0.167805	-0.479317	-0.432276	-0.137866	0.299447	0.0447068	-0.294462	-0.0692177	-0.508774	0.0975366	0.341338	0.282915	0.393588	0.952623	0.300959	-0.0870037	0.164378	0.305409	0.678736	0.406059	0.225306	0.0305448	-0.0347605	-0.100695	-1.33133	-0.560908	-0.42979	0.173895
LINC01869	0.0816064	2.44403	0.258039	0.714582	-0.644957	0.0227962	0.485342	0.104283	0.115211	-0.794592	-0.847247	-0.334831	1.08831	-0.733126	0.737419	-0.74049	0.562255	-2.09467	-0.119901	0.370928	1.04208	-0.73534	0.280141	0.764828	-0.124145	-0.523113	-0.397664	-0.116863	2.15564	-0.621708	-0.527005	-0.835699	-0.78463	0.212152	-0.0227966	-0.439225	0.086554	0.338438	-1.03705	0.337599	-0.226367	-0.162534	1.36175	-0.402189	2.15169	0.741022
LINC02712	-2.01999	2.54041	-1.68166	-0.234479	0.7141	-0.17174	0.345513	-0.0319977	0.514986	0.042037	-0.776241	0.520007	-0.171533	0.332989	0.391466	-0.0101118	0.805874	-0.377016	1.11377	1.39217	0.0428853	0.0101118	-0.602538	-0.574683	-1.33064	-1.77736	2.14213	-1.78888	-0.572465	1.23909	-3.03268	-0.810662	-1.02108	-0.802402	0.746504	-0.533974	2.25044	0.820574	0.3783	-0.285962	-1.66074	2.35901	0.407903	-0.617276	0.749222	2.22596
BAALC-AS2	1.36034	-0.944053	0.639111	1.23699	0.0349355	1.2325	1.46469	1.19942	1.10824	-1.60162	0.444808	-1.26564	0.882164	-1.84397	-0.0281882	0.893383	-0.947072	-1.59148	0.0700922	-1.19419	1.00573	1.57623	-0.586391	-0.724012	1.40166	-1.38403	-0.420581	0.653153	1.26428	0.860309	-1.48837	-1.1574	-2.62625	-0.996312	0.0281882	-2.82482	0.0561385	-1.3314	-2.2366	0.696416	1.53012	-1.73709	-1.06127	-0.889733	-0.548737	1.15966
KATNAL2	0.331756	-0.671452	2.38042	-0.752825	1.06636	-0.0509911	-0.202348	1.17971	-1.1154	1.73808	0.908006	1.10575	-1.60109	0.0509906	-0.933558	-0.347638	-0.728566	0.982131	-0.537324	-2.24901	-1.52003	-1.13409	2.13488	2.92278	-0.370673	-0.969237	1.72896	0.255931	-1.41893	1.12881	-0.57757	1.43456	2.47746	0.780496	0.188267	-0.557816	1.51001	1.52299	-1.98677	1.78289	-1.59845	0.147827	-1.70747	1.55012	-0.563205	-0.596049
COCH	0.0662138	0.745644	2.26912	0.0297349	2.31264	-0.710876	-0.685031	-0.199355	-2.2084	2.89848	-0.535805	1.99096	-0.0752079	0.210088	0.661786	-0.505187	-0.728713	-3.66034	2.10097	0.419239	2.58779	-0.0297349	-0.0479305	-2.1627	-0.536708	4.20899	-1.57266	2.59391	0.558158	0.490555	-0.313878	-0.420712	-0.887796	2.15839	1.51532	0.397913	0.311639	-0.270434	2.45221	-3.59824	0.340428	-0.219518	-0.693364	-0.591149	-0.171287	0.291332
C1orf210	-0.235156	-0.829025	0.146094	0.603273	-1.0494	-0.312774	0.144153	0.0868888	0.530719	-0.479021	-0.490125	-2.20623	0.422718	0.519625	-0.173569	-0.0868888	0.414761	-0.655039	-0.262359	-0.374326	-0.951739	-0.684204	-0.320251	1.44338	-0.389061	-0.460017	0.765383	-1.14636	0.335926	0.115278	0.799771	0.882089	0.84086	0.482488	0.34866	1.55414	-0.0924544	0.649643	0.347159	0.282739	0.958193	-1.50023	-0.728742	0.248314	-0.295673	-0.400679
CERS3	-0.181842	0.799943	-0.591105	-0.989381	0.234706	-0.17424	1.1561	-0.721565	2.59663	-0.296374	0.215014	-0.799516	-1.3512	0.741812	0.706245	-1.42155	-0.00607967	0.0243344	-1.15757	-0.415952	0.241174	-1.54716	0.286857	-0.345864	0.769925	0.292479	0.00607967	-0.0299625	0.205578	-0.196267	0.703178	-2.0239	-0.311658	0.744839	0.794976	-0.372189	1.13771	-0.313511	0.376948	-2.21924	0.422147	-0.0512829	1.10901	-1.22913	1.66857	0.774391
DNAJC5B	0.213336	-1.04274	0.187421	0.0665445	0.262959	-0.766293	-0.00230169	0.671442	-0.137507	-0.588719	0.0406122	0.266566	-0.147229	0.415019	0.587925	-0.314971	0.0646982	-0.142829	0.382141	-0.330381	0.940701	0.943688	0.00230169	0.957501	-0.929638	-0.0552335	0.771286	0.354069	-0.676041	-0.438307	0.141593	-0.418856	0.170388	-0.013566	-0.409857	0.448766	-0.0130692	-0.720524	-0.494916	0.901026	-0.00477123	0.0102167	-0.330347	-0.0213213	0.370598	-0.0116682
GPSM1	-1.96625	-0.3411	-0.57849	0.552431	-0.390325	-0.0552301	0.712497	-1.01659	0.878722	-1.80658	1.24946	-0.485574	-1.45031	-0.0732098	2.67996	-0.254907	-0.0721235	2.39417	0.526003	2.20631	0.0552301	-0.458987	0.137325	0.325466	-0.347166	0.209386	-0.168952	1.69533	-0.256076	0.296502	-1.37009	0.806045	0.406749	-0.123859	0.372476	1.26746	-1.24302	0.457931	-0.0701509	-1.10383	0.449204	0.693162	0.908214	0.525447	-0.140846	-0.305609
KLHL29	-1.81736	-1.63473	-0.386071	1.37975	-1.87468	-0.230106	-0.954992	2.6687	-0.867776	-1.36835	0.315062	-1.78161	0.0323787	-0.0954003	1.37504	-1.49009	-0.903383	-1.64695	1.90949	2.25189	-1.51963	0.84216	0.361135	-1.21129	2.65412	1.16876	-1.4727	1.08167	2.30655	-0.977508	-0.50209	-0.0323787	1.7279	2.06796	2.25253	0.415662	0.0673027	2.50732	1.37701	-0.16968	1.38288	-1.55851	1.32794	-0.383935	-0.881483	1.35401
CKAP2	-0.0594177	0.481136	0.00816011	-0.826475	-0.249823	-0.423524	-0.0710411	-0.81085	0.0378675	1.02525	0.403114	-0.00816011	-0.991024	0.478746	1.02902	-0.352734	-0.100076	-0.613485	0.482083	0.342656	0.907783	-0.807238	0.194519	0.351556	0.538982	0.741945	-0.835127	0.125865	0.931203	-0.0771546	-0.642598	-0.0342989	1.05672	-0.702824	-0.280042	-0.945988	0.37311	-1.09256	1.00262	0.938501	0.905515	0.909147	-0.0805602	-0.602687	-0.79598	1.12818
ERAP2	-0.713639	-1.96621	-0.1536	1.63659	0.373647	2.35504	2.50697	-1.59179	0.937762	-1.07627	0.704461	-0.992185	2.2101	-2.7146	1.6184	0.501571	1.72129	-1.10842	1.90668	0.899224	1.35519	-2.82897	0.875253	-0.698118	0.128367	1.19436	-1.01924	-2.76612	1.45521	0.414178	-2.39685	0.212036	-0.541188	-1.24503	-1.13949	2.23881	-2.69137	0.12438	-0.26502	-0.339365	-1.46126	-2.51381	0.873833	0.0415874	-0.0944271	-0.0415869
SART3	-1.00537	-1.22983	0.497567	0.449709	-0.89111	-1.22877	2.92586	1.90452	1.94186	0.232012	1.74624	0.233148	-1.45764	0.818106	2.44185	-0.94186	-0.0735674	-0.197964	-1.41843	-0.341841	-0.993994	-0.429255	2.56073	-0.0547085	3.65205	-1.28506	-0.8445	-1.05811	0.276706	2.15714	2.75022	-0.251243	-0.860426	-1.35179	0.246839	0.902103	-1.49748	2.9828	1.37137	0.0879416	-0.416331	-1.2363	-0.277099	0.0621886	2.65281	0.054708
FANCM	0.262152	1.05165	-0.254859	2.19277	-0.716193	-1.39623	1.66294	1.2069	-1.72505	2.5763	-0.586668	2.45315	2.38028	-0.203858	0.231314	3.00682	-0.435168	-2.15305	2.3681	1.26651	-2.12215	1.40316	-1.71645	-0.460371	-0.203967	-0.691248	0.682521	1.56414	2.13994	1.97281	2.53626	-0.508863	1.96586	-0.624144	2.72287	-0.0678554	-1.60034	0.349506	-0.535038	-1.95409	0.0678554	1.87788	-0.288147	-0.886037	-0.576431	-0.730656
C9orf43	0.631267	-0.315747	-0.683726	0.129136	0.392147	-0.190136	0.142179	0.393541	-2.57139	-0.361032	0.705853	0.514593	0.97004	0.676237	-0.25393	0.209108	0.956104	-0.137179	-0.112687	0.924938	0.331141	-0.404049	-0.00971556	0.161222	0.729638	0.00971556	0.674517	0.409479	-0.128575	-0.670209	-3.33425	-0.45561	-0.157131	-1.11025	0.0954523	-3.42112	-1.13855	0.442784	0.144295	-0.365349	-0.213831	-0.315648	-0.0570025	0.313463	-0.327018	0.597831
NOCT	-0.313383	0.767869	0.12513	-0.0318868	-0.144254	-0.132375	0.851765	0.410636	1.55764	0.982422	0.0318868	0.0446837	-0.305341	-0.342593	-0.117236	0.67409	-0.407188	-0.513244	-0.28623	0.372895	0.377638	-0.174105	0.613023	-0.45873	0.525219	-0.19334	-0.651768	0.357855	-0.335467	-0.0333455	0.396506	0.0572732	0.346312	0.548155	-0.158891	-0.341082	0.414034	-0.161429	-0.0761125	0.361234	0.684924	0.488065	0.3511	-0.640862	-0.907465	-0.217111
HAVCR2	-0.458092	-0.401463	0.291942	-0.307762	0.508581	-0.10546	-0.424099	0.196444	0.337023	-0.596871	-0.0912988	1.13447	-0.233989	0.640748	-0.628555	-0.0724504	-0.606175	0.878533	0.673688	0.109835	0.72877	1.0352	0.66283	-0.841651	0.412747	-0.052285	1.07337	0.896429	-0.476418	0.343282	0.179081	0.00735688	0.00444055	0.403961	-0.0685899	-0.200087	-0.00149894	-0.632344	-0.00781178	-0.0180233	0.551418	-0.884381	-0.660109	0.00149894	0.119555	-0.851857
FLJ25758	-2.21298	-0.0839119	-0.779243	-2.80406	-0.302812	0.0275149	-2.28709	-1.04426	1.23411	0.213743	-0.547962	-0.0275149	-2.50962	0.263571	-0.0277538	-0.918189	-0.33518	0.343283	0.113046	0.0289221	0.36274	-0.24646	0.695695	-0.0463624	0.315539	-0.331167	0.26288	0.26225	0.379107	1.01981	0.689318	0.706764	0.126177	-1.1087	0.46235	-0.229545	0.205101	0.28315	-0.679225	-0.300534	0.480116	0.284453	-2.92004	0.489065	-1.25993	-0.603426
TRIM4	1.06814	-0.27822	-0.258376	-0.160888	-0.206678	-0.574245	-0.0403373	0.560222	0.0513589	-0.489443	1.65127	0.379386	0.128716	-0.0546014	0.391133	-0.0777142	0.00283694	0.520591	0.134466	-0.474897	-0.326513	-0.312753	0.738876	0.14292	0.923473	0.461286	-0.756887	0.755131	0.528457	0.199276	-0.854516	-0.525555	0.636039	0.359398	-0.0975697	-0.235067	0.222748	-0.378968	-0.00283694	0.0173767	-0.191843	-0.636591	-0.32809	0.60492	-0.890293	0.619537
TTBK2	-2.45721	2.06083	2.227	2.92196	2.07493	-2.53681	0.314092	-1.0174	2.18591	-1.29856	-0.59351	-0.219526	0.0570655	0.642079	-0.201949	-0.516954	-1.48626	1.39562	-2.01542	0.0726481	-0.253828	-1.99461	2.63443	-0.438925	1.10821	-1.47431	-0.459259	-1.21379	-0.459734	3.07109	1.74837	1.4008	2.3628	2.8728	-0.250089	-0.691138	2.29992	2.78412	-0.0570655	-0.731394	-0.201736	2.93978	2.33691	-0.514925	0.0874577	2.41188
WDR49	-0.893895	-1.11572	3.7031	-0.784296	-1.34145	-1.246	1.15502	-0.615955	4.69227	-0.75656	2.78328	2.85392	-0.408401	1.34	-1.27803	-1.26	0.557879	1.58984	-0.923452	0.123463	1.44124	-1.37411	-1.35339	-1.16696	-0.0294299	2.95851	2.06041	-1.31126	-1.08409	-0.077724	-1.26618	0.0294299	1.77169	0.696269	3.04636	-1.25766	-0.643938	-1.24267	0.155515	4.01638	3.00746	-1.16262	1.4716	1.14922	1.08231	3.08875
NPAS4	-1.86127	-1.54443	-1.12672	1.3046	-2.30249	-0.363392	0.336359	-1.32517	-0.804813	0.496645	-1.22356	1.32377	-0.755382	-1.19405	1.2075	-0.0403166	-0.0397983	2.86007	1.508	0.270431	-0.887734	1.21579	1.87514	0.52856	-1.74287	-0.92957	-1.01388	-1.28611	2.51187	1.83306	1.66122	-0.0855088	-0.0726996	-0.401354	-0.382314	0.569494	0.0397983	-0.578839	0.145195	0.113352	-1.53559	3.0374	1.98544	0.457122	0.492967	2.29772
SVOPL	0.321635	0.83586	-2.07681	0.426349	-0.103619	0.38575	2.14758	0.0206327	1.84383	1.5181	0.599791	0.275519	-0.285637	-0.311244	-0.418202	-1.72501	-0.699831	-0.197514	0.821492	2.44727	-1.72879	-0.580859	-1.20023	-2.43976	0.842872	1.11601	-0.0206332	-2.37965	3.84965	0.886526	-0.530373	1.39737	-0.604635	-0.819696	3.63877	3.35679	-2.64987	0.720084	-2.64977	0.426658	-1.13116	-1.31015	-0.747074	2.6414	1.805	-0.575191
LHFPL3-AS1	-1.14073	-0.793645	-0.419324	-0.915595	-1.07158	-0.724182	0.518338	2.93232	2.15744	-1.10481	-1.96323	-1.44417	-1.2144	-1.13591	2.71767	3.06639	2.98328	2.35632	-0.690799	-0.118187	0.239203	2.54508	-0.0111351	0.72367	0.578082	1.04655	1.39619	0.0111351	0.470167	-1.30071	2.39107	0.290412	1.92526	-0.319427	-1.11041	-0.194611	0.208492	-2.25522	-0.336065	-0.125237	-0.165789	0.210034	0.130445	3.64226	-0.165948	3.36034
LOC91370	-0.1901	0.019511	1.01295	-0.125686	0.246822	-0.000775	0.462519	0.418276	-0.0555832	-2.22057	0.698561	-1.12687	-2.0404	-1.60039	0.96355	0.145774	0.000775	-1.27102	-1.28953	-1.77897	-0.665657	0.186857	0.224822	0.7987	0.754002	0.593453	0.0119417	0.193725	-0.760412	-0.0284588	-1.97718	0.44957	-0.344465	-2.76435	0.330659	-2.04723	-0.69522	0.279597	0.732443	-0.0731556	0.459241	1.087	0.604635	-0.253073	-1.64479	-2.19315
SUPT6H	0.129279	-1.28021	-0.461987	0.346567	-0.103333	-0.383873	-0.151967	0.696583	0.108451	0.421687	-0.0974722	0.321163	-0.339385	-0.257125	-0.165284	0.388098	-0.452932	-0.139355	-0.46898	0.319297	0.404286	-0.0174346	-0.431129	-0.577994	0.0174346	-0.398687	-0.111866	-0.0260386	0.278609	0.406962	0.837847	1.06564	-1.14688	0.765275	0.861347	0.633565	0.528981	0.978474	0.923804	1.3223	1.59323	0.303998	-0.717721	-0.553476	-0.0805864	-0.243183
RNF170	-0.667449	-0.125362	0.0196745	0.275775	-0.0885656	-0.432395	0.5871	0.679453	0.332449	-0.704296	-0.181964	-0.135202	-0.090317	0.306084	0.819255	0.216419	-0.172126	0.00935531	-0.185986	-0.199911	0.636819	0.431762	0.736714	0.54196	-0.362031	-0.119357	0.26387	-0.505837	0.00197816	-0.144788	0.517228	0.165171	-0.143109	-0.00197816	-0.366253	0.130663	0.12162	-0.0992506	0.586573	0.275803	-0.0194371	0.469833	0.173016	-0.0127246	-0.473885	-1.01893
C6orf141	-1.14954	0.783991	-0.132699	-0.340363	0.0422597	-0.462011	0.722714	-0.923216	-0.256214	-0.689066	-1.20175	-0.0414639	-1.20841	-0.50492	0.362285	2.16409	0.626816	0.779724	-0.14486	0.132843	-0.113505	0.0414639	0.99633	-0.475072	1.25683	-0.186471	-0.600346	1.11505	0.492313	0.899428	1.00341	0.604362	1.98085	-0.620852	-1.64764	-1.93169	1.0062	-0.735712	1.36638	-1.14897	1.58716	1.66643	0.823495	0.304907	-3.10417	-0.614717
HDAC4	1.89907	-1.07783	-0.980864	-1.21504	-0.161131	0.435045	1.31364	0.416753	-0.00965476	-0.0317581	0.702031	0.735775	-1.02982	-0.911714	1.79892	1.54289	1.46355	1.54138	1.34226	-0.588119	1.27719	0.346649	1.52225	-0.728773	-1.21813	-0.658693	-1.28434	1.17877	-1.55549	1.36054	1.77046	-1.21508	0.00965476	-2.10347	-0.247763	-0.839906	0.894206	1.62657	-0.533622	-0.259457	-0.305526	0.291866	-1.22124	-0.947628	0.980507	0.0906239
DOCK2	1.11815	-1.84712	2.48451	2.99211	-0.167377	-1.55634	-0.446045	-0.800382	-1.06749	-0.386844	1.0202	2.12452	-0.522679	0.31053	-0.0577373	0.19594	-0.266928	-0.185087	1.25167	-0.836211	-0.250201	-0.882521	0.0587835	-0.0592256	0.442844	-1.54964	1.66057	1.48523	0.0467195	0.808367	-0.856098	1.53328	0.891291	0.231566	-0.482631	-0.04672	-0.249513	0.611594	1.08116	-1.82598	2.76185	-0.059413	0.494966	2.80115	-0.5913	1.38051
LRRC18	0.924375	-2.46339	0.850927	-1.20113	-2.70782	-2.86334	-1.66065	-0.0689011	1.35019	-0.772886	0.620436	-2.22038	0.862153	-1.5421	0.901822	0.296047	-3.03585	0.542495	1.16209	-0.384604	0.682985	-0.123935	0.734821	1.3561	-2.00994	0.190668	0.827936	0.650029	0.981359	0.412791	0.414346	-2.06636	-2.73601	0.600501	-1.71844	0.0340753	1.06726	-1.63922	0.230524	-0.050878	-0.0340753	-2.05675	-1.32981	-1.26787	-1.61232	0.277165
SLCO4A1-AS1	-1.1859	-0.584592	-0.15753	0.458196	0.307002	-1.11184	1.08112	-0.0751071	-1.26791	0.116115	-0.209691	-1.49361	-2.73674	1.89823	0.566435	1.21543	-0.280025	0.181434	0.780091	-0.20703	-1.03072	-0.651478	-0.834904	0.753177	0.416035	-0.0669308	-0.651775	0.0242047	0.354106	0.826736	-0.173096	-1.06649	-2.28841	0.525085	0.753422	-0.174557	1.11021	-0.533886	-2.34494	0.205374	0.654134	0.553583	-0.0242047	0.703361	0.152928	1.90583
CYTH4	1.52527	0.191454	2.40043	2.38012	2.17895	-1.5994	0.981819	-0.0252547	3.79208	-1.52825	0.745107	1.64174	2.58216	2.43693	0.225649	-0.220527	-0.932123	0.14905	1.85896	-0.62023	2.57507	1.3874	2.95782	-0.459261	0.523865	0.0196238	-0.33968	0.980239	-0.183988	0.958319	-0.14685	-0.539862	-0.444586	-0.189042	1.86747	-0.480006	-0.682383	-0.144435	-1.02634	0.205102	-0.355438	-0.0755029	-0.795354	-0.517658	-0.0196242	-0.100486
FARP2	-0.75567	0.615315	-1.63753	-2.02227	-1.92026	0.524658	1.25745	-1.72194	-0.0297675	-0.755903	-1.26646	-1.6397	-0.0543852	1.16824	1.68151	-2.58406	0.76959	-0.200675	1.61013	-1.22098	-0.186389	-0.519601	-0.209966	0.301539	2.23789	-0.118272	1.93356	1.97892	-0.736692	-1.1917	1.07601	-1.42311	2.20946	1.61854	0.029767	-1.14407	-1.13741	1.21399	-0.704428	0.883863	1.41615	2.63417	0.5176	0.709842	0.34269	2.74677
COG3	-0.274186	0.134142	0.556085	-0.498863	-0.895263	-0.245773	-0.139376	1.35191	-0.915213	-0.363266	0.334015	-0.91898	-0.309526	-0.0349855	-0.22862	-0.436153	-0.135153	0.0347691	-0.272288	0.223897	-0.301769	-0.856262	-0.264637	0.518176	-0.71466	-0.361053	-0.370829	0.227051	0.118884	1.04342	1.13196	0.861204	0.76433	0.805108	0.689307	0.818013	0.192689	1.10656	0.767331	0.731796	0.893634	-0.0347691	-0.23238	0.606695	-0.479714	0.963395
DRAXIN	-0.367651	-1.57256	2.78513	0.0059433	2.56959	-0.418683	-1.41843	-0.0059433	0.169847	-0.73202	1.17232	-0.900614	0.9062	2.64534	-2.11574	1.88873	-0.604521	-0.283671	2.45637	2.52193	0.8266	2.49963	1.70641	-0.424363	1.10933	1.38635	3.15739	1.91367	-2.77062	0.687817	-2.28756	-0.469353	0.29314	1.36202	2.75587	-0.540322	-0.798955	-2.09345	-0.876222	1.75756	2.70034	-0.994125	-0.182497	-0.344274	-0.0501165	-0.580575
STAP1	-1.17516	1.40553	2.0341	0.226991	0.686472	-4.84611	-0.808623	0.0955324	1.44951	-0.942486	-0.984865	-1.01627	1.303	-0.23161	-4.07189	-0.664609	-2.83332	0.141932	-0.904123	-0.234637	0.968727	0.0385561	-0.429285	-4.75888	-0.160975	1.51123	0.494638	-0.14422	0.948905	-2.12181	0.489944	-2.37249	-3.72994	0.238942	0.746517	0.721788	-0.0385561	0.23816	-0.252622	0.309904	0.308276	-1.0016	0.266784	0.623356	0.939614	-3.34614
GNB5	-0.441456	-0.381982	-0.980568	0.457569	-0.326346	2.01193	0.953833	-0.164621	2.49811	-1.13864	-0.546564	0.219461	-0.25772	0.698585	0.228858	0.107276	0.553775	-0.278198	-0.0222979	2.47801	1.47113	-0.472109	-0.0622745	0.171012	1.00403	2.42721	-0.383543	0.468709	-0.89634	-0.721766	0.0222979	0.467873	-0.301367	-0.489592	-0.215844	0.92991	2.46057	-0.576753	2.1499	-1.26953	-0.356652	0.249982	0.0479059	0.474636	-0.418775	-0.373455
ATP23	-1.38911	-1.22142	-0.813068	0.564311	-1.32031	0.378438	0.397224	-0.311445	0.640298	-1.43099	1.59223	2.27821	-0.44113	-0.438181	2.49219	0.360444	0.417641	0.432281	0.0997429	-0.772438	0.065526	2.04391	2.69439	-0.846558	0.847955	-0.718528	-1.16897	0.754521	-0.888071	-1.57165	-0.550372	-0.121233	-0.624924	-1.82983	0.744916	-0.185563	1.57136	0.054409	-0.688119	-0.0988989	0.100087	2.3682	-0.0982122	0.213326	-0.0544095	0.582869
TIPRL	0.0584145	0.675758	0.386578	-0.317443	-0.583692	-0.214428	0.0416231	-0.21716	-0.662005	-0.127069	-0.129048	-0.0758877	0.102194	0.106632	-0.275306	-0.254027	0.376648	-0.757179	-0.385532	0.0180597	-0.0290079	-0.0924311	0.0465641	0.221014	-0.268133	0.110673	0.138752	-0.319423	-0.323004	0.507324	0.314584	-0.261978	-0.179537	-0.0342131	0.0116224	0.114088	1.20768	0.524586	0.708357	-0.0116224	-0.277478	0.512587	-0.223361	0.219559	0.198772	0.491997
SIAE	1.62186	-0.661495	2.2614	-0.793485	-3.02535	2.47803	-0.931128	-1.29773	0.510828	-2.60453	1.05814	-2.08652	-1.97599	1.23507	2.79247	1.24005	0.236164	2.00054	2.38146	1.56111	1.78684	-2.30312	-0.731027	1.47166	-1.11467	0.875452	1.80723	-0.262548	-0.983202	-1.70278	-0.236164	-1.28931	-1.32738	1.13543	2.17804	-1.4165	0.6078	0.948478	0.951952	2.44316	-0.530114	-1.46089	-0.777809	2.82653	-1.31417	-1.05357
CALHM1	-0.0374141	0.318244	0.345874	-0.192836	-0.017271	-1.10123	0.129479	-0.727378	1.06046	0.00380421	0.167559	-0.293996	-0.703929	0.749974	0.522136	0.657682	-0.150016	-0.58856	0.393549	-0.0926538	-0.526424	0.623265	-0.0439754	1.22561	0.13161	0.506207	0.0219932	-0.00380421	-0.087729	0.236587	1.03645	-0.422737	0.238526	-0.0392013	-0.280119	-0.369387	0.315111	-0.0654345	-0.129985	1.59828	-0.499162	-0.438745	-0.653498	0.771564	0.490582	0.262238
TP73	2.66737	0.67101	0.578028	2.84274	2.46925	-0.815603	-0.402692	0.0389104	-1.07467	-0.284844	-1.17031	-0.329905	-0.803138	-1.3322	0.476536	0.35207	-0.989835	0.0111413	-0.634909	-0.384385	1.40124	-0.0111408	-1.25384	1.01284	-0.12387	1.3463	1.75435	0.206428	2.34655	-0.513287	-0.723546	-1.79558	-0.325582	2.45442	2.79875	-0.141301	-2.05299	-1.67592	-0.971256	1.77652	1.90969	-0.505879	2.25407	3.06106	0.595419	3.29902
LINC00656	-3.05765	-0.14438	-1.62031	0.461231	-1.78067	-0.761072	-2.02306	-0.551294	1.85109	-0.317013	-1.36766	-2.84452	0.796369	1.15259	0.20902	-0.68495	0.412756	-2.06898	1.40949	1.16319	-1.35561	-3.78707	-1.52507	-0.133932	-1.24894	0.798112	-2.52726	0.850537	0.26605	0.133932	0.149195	-0.886485	0.156315	0.472327	1.66883	1.20428	0.701649	1.41252	1.19364	1.12445	0.665955	-0.138633	-0.348032	1.16534	-1.82645	-1.24219
PADI2	0.436207	-1.83603	0.563964	0.231386	-0.30427	0.21797	-0.177144	0.0182283	0.334731	-0.920863	-1.06635	-0.950771	-0.0182283	0.458515	-0.370424	-0.773228	0.87613	-1.27896	-0.335155	0.712788	-0.41497	0.416656	-1.36022	0.491752	-0.0371339	-0.660421	1.23286	-0.999853	0.974403	-0.0320604	2.24249	2.25623	0.194414	0.592359	0.417264	2.33893	-0.504264	0.880684	0.150297	1.01848	1.3061	-1.23851	-0.525572	-0.225996	-0.309671	-1.3651
CST9	-0.548969	-0.286097	0.0353065	1.86294	-0.449543	-0.461729	1.10698	2.46668	0.760556	0.352265	-1.016	0.920489	-0.801394	-0.0821934	-0.931102	-0.190061	2.48662	0.330311	-0.540712	0.697824	1.63156	1.47974	-0.565923	0.485669	-0.715185	0.291185	-0.803778	-1.00379	0.580268	2.64631	0.309441	0.263536	-0.0809784	1.48984	-0.750497	-0.929783	-1.18056	-1.65188	-1.968	0.121359	-0.332954	0.655524	0.219057	-0.710075	-0.035306	1.11171
UEVLD	0.125227	0.923451	0.91069	-0.147479	-0.433951	0.363361	-0.0249124	0.269051	-0.248561	-0.297446	-0.0521531	-0.500731	-0.0169902	-0.195708	-0.195565	0.259376	0.262737	0.280356	-0.25926	0.0509915	-0.922688	-0.69491	0.423399	-0.0161347	0.089437	0.0403686	-0.235389	-0.0902533	0.539862	0.32586	0.344017	0.91987	0.1376	0.406359	0.0161347	0.562262	-0.394166	0.562542	0.404549	0.209948	-0.172596	-0.228806	-0.648091	-0.22253	-0.414384	-0.0434833
LYG2	0.377144	-0.853088	-0.907769	0.426947	-0.856306	-1.70442	0.781691	-0.708628	1.80178	-0.545948	0.160923	-0.616565	0.457876	1.41984	0.296001	0.706572	-1.65063	1.29403	2.19543	1.39632	0.451657	-1.28896	-1.1326	-1.1491	-1.87176	-0.0854778	1.25143	-0.185613	0.974286	-0.690578	-0.320016	2.20913	-0.897489	2.33038	0.0854778	-0.700899	-1.02065	2.60105	-0.303364	2.79054	3.10157	1.89815	-0.988502	-0.489772	0.286216	-0.656695
TCTE3	1.56737	-0.105373	-0.511961	1.71787	2.12292	-0.290566	-0.711473	1.67795	1.09238	1.61967	-1.16354	-0.719505	0.345172	-0.38283	-0.598456	2.01527	-0.183821	-0.661337	-0.998068	-1.35366	0.373056	1.79302	1.697	0.022532	0.430334	-0.515964	1.98169	0.737837	1.92438	1.0281	1.62194	-0.022532	-1.58746	-2.12111	-0.72081	0.127283	0.198623	-0.585493	-0.156609	-1.25253	1.35731	-1.58414	-1.35485	0.0874848	0.816894	-0.835936
LINC00161	-2.10364	0.708305	1.14235	0.415271	1.47357	1.46966	-0.0108943	1.14678	0.32695	-0.0123734	0.972314	0.170358	-0.497467	-2.24776	0.883203	0.782005	-1.30409	0.707847	-1.1685	-0.669407	1.35444	1.18897	-1.11963	1.98515	-0.376249	-1.15894	-1.52228	1.21661	1.15809	-1.42827	-1.67984	0.0479422	1.56549	-2.12862	0.0108943	0.748355	-1.3066	-0.484056	-0.577777	-0.209959	-0.0578799	-0.173413	2.0188	-0.629759	-0.84767	0.935426
TAF5L	-0.438677	0.617434	0.081423	0.107216	0.0403903	-0.236677	0.446558	0.540223	-0.665784	1.15312	-0.545638	-0.276803	0.162239	-0.0250347	-0.206738	0.141481	1.37627	-0.723321	0.332785	0.0585973	-0.173511	-0.317559	0.677106	-0.47877	0.204029	1.19809	-0.427787	-0.33507	-0.31791	-0.362723	-0.760749	-0.755573	0.0250347	-0.290898	-0.464993	-0.539528	0.466138	-0.532486	0.463546	-0.611634	-0.544958	0.592593	0.138007	0.171114	0.763529	1.3742
APH1A	0.10331	-0.514747	-0.662055	0.0475345	-0.46138	-0.0452704	0.165128	0.428385	0.12103	0.103884	0.0286698	-0.460733	-0.499344	0.0769973	-0.546252	-0.0286698	0.1131	-0.761893	-0.494959	-0.0895114	-0.814257	-0.545446	-0.0667081	0.658085	-0.0881124	0.303468	-0.173012	-0.280963	0.0395951	0.706756	0.681566	1.00323	-0.0472665	0.380454	1.24884	0.824813	1.07132	0.800653	0.815454	0.971508	0.841706	-0.49394	-0.720713	-0.744424	-1.19102	-0.937235
DMWD	-0.0599637	-0.429997	-1.25143	-0.0248094	0.335216	-0.177753	0.503497	0.176757	0.345807	-0.0857043	-0.773857	-0.303842	0.000501	-0.184038	0.0660749	0.247676	-0.415929	-0.292938	-0.0838237	-0.722387	-0.466111	0.416795	0.0964007	0.418823	0.393228	-0.343581	-0.000501	0.0645022	0.13069	0.480416	-0.0278974	0.573066	0.214111	-0.217564	0.240458	0.399208	-0.0823436	0.437683	0.216979	0.218734	0.510941	-0.0201869	-0.0931277	-0.323648	0.125048	-0.0639701
SMIM11A	-0.119553	0.542773	0.638395	0.231131	-0.0110769	-0.304547	0.417079	0.590556	-0.597221	-0.044085	0.419383	0.2242	-0.267589	-0.0478449	0.111999	-0.294902	-0.165575	-0.725678	-0.0310082	0.0110769	0.348654	0.407637	-0.620747	0.597359	-0.280628	-0.341577	-0.374717	0.0416613	-0.0932817	0.102476	0.217608	-0.229242	0.104722	-0.319929	0.117717	-0.361592	-0.0822306	0.522121	-0.127359	-0.0413919	-0.12968	0.724619	0.633087	0.154927	0.398427	0.804183
SLC35F6	-0.111871	-0.0276847	-0.30206	0.150153	-0.31608	-0.25873	0.655375	0.828197	-0.311263	0.324236	-0.164752	-0.340074	0.000823	0.135013	0.467258	-0.547863	-0.000823	-0.100315	-0.779627	-0.0243478	-0.156628	0.232832	0.334699	0.18506	0.496622	-0.437027	-0.645168	-0.299898	0.056644	0.281834	-0.425837	0.221766	-0.600929	0.324231	0.279406	0.388858	0.448626	-0.0242467	0.627101	0.523159	0.568697	0.345868	0.0126762	-0.896349	-0.155002	-0.204734
JPX	-0.0965757	0.12372	-0.103039	0.230558	0.515549	-0.774276	0.00375366	-0.753568	-0.119724	0.269983	0.557856	0.894333	0.290336	-0.0383983	1.40654	-0.596687	-0.807738	0.27397	-0.196422	-0.00375366	1.95978	0.217094	0.119116	-0.386668	0.970825	0.38161	0.388264	0.195436	0.751123	-0.262592	-0.534819	-0.0352082	-1.00571	-0.2204	-0.193655	0.0673995	-0.667292	0.281761	-0.875051	-0.43891	-0.455006	-0.00770998	-0.510779	1.02271	0.977798	0.614412
DNAJC14	0.571982	-1.04896	-1.15037	-0.107562	-0.0016551	0.731657	-0.0432992	0.211923	-0.222148	0.699629	-0.271604	0.411993	-0.741681	0.163126	-0.311784	-0.300188	-0.197946	-0.155297	0.124771	-0.0212369	0.0016551	-0.623719	0.0203843	-0.61295	0.238942	0.130868	-0.250912	0.21187	-0.151678	0.171035	0.430757	0.0764632	0.117976	0.162659	0.331633	0.306624	0.6628	0.65518	0.332865	-0.0609088	0.834454	-0.678574	-0.241098	-0.285756	-0.986418	-0.54473
HILPDA	0.254689	1.27015	-0.676987	-0.671182	0.265568	0.23148	0.458251	-0.416632	-0.867354	0.805038	0.489144	0.047564	-0.598692	-0.676717	0.913683	-0.972075	0.429651	2.05565	0.414031	-0.549548	-0.460282	0.914123	2.54581	0.172597	0.191521	-0.113859	-0.8078	0.957202	0.133196	0.0176396	-0.603073	1.21891	-0.196078	-0.0611272	-0.161561	-0.950523	-0.777013	0.0785794	-0.619466	-1.15876	-1.65391	0.707967	-0.0176396	-0.18101	0.130689	-0.730484
CFHR3	0.953054	-1.389	-0.615547	0.568403	-1.15766	1.21373	0.194104	-2.24354	2.92087	-1.88661	-0.827834	-1.52383	1.22312	0.873648	-1.37862	1.60083	-0.189802	0.0807071	2.39901	2.10419	-1.71246	1.66851	-0.685517	0.626884	-1.05681	0.658334	-0.927733	-1.80379	1.72898	-0.0807066	-2.08309	-1.49092	1.62618	-1.69138	-0.698692	1.30151	2.21338	-1.15602	-0.258127	2.08236	2.19135	2.60761	-0.489603	0.164596	1.34627	-0.0815706
MOXD1	-0.46768	-0.868383	0.0269432	-0.0269432	0.709521	0.200949	-0.452867	-0.367615	-1.10662	-0.611833	0.0811062	0.526059	0.7874	-0.534774	-0.997198	-0.191444	-1.11142	1.07108	0.391284	0.569566	0.729946	1.26458	0.769331	-2.05594	0.824031	0.659872	0.786593	1.47107	-0.545862	0.694497	-0.0909996	-0.554631	0.151266	0.461817	0.150372	-0.912177	-0.782501	-0.475685	-1.16926	-0.766673	0.405477	-0.365862	0.868315	-0.510944	0.484007	-0.119841
ZNF808	-0.406595	0.671472	-0.303021	0.000223	-0.0837014	-0.118755	0.658596	-0.0741942	0.167898	0.178786	-1.23751	-0.897808	0.107951	0.346915	0.863275	0.560751	0.465539	0.00474429	-0.169687	-1.3348	0.473121	0.281463	0.260751	-0.0191028	-0.507816	-0.753818	0.14213	0.45864	0.557055	0.218632	-0.145476	-0.481229	-0.276017	-0.189934	-0.0773952	-0.0354984	-0.000223	-0.453572	-0.388665	0.55494	-0.000474	0.0289986	-2.72554	1.25533	0.709274	0.649875
HEATR3	0.0210478	-0.291285	-0.727558	-0.00190425	0.892491	1.08482	1.17767	1.07653	0.621711	0.923269	0.32216	-0.404608	0.132128	0.0256832	1.56913	-0.0908024	0.835956	-0.334951	0.340606	0.5112	-0.0842564	-0.791716	0.333088	0.152907	0.306689	0.588856	-1.29086	0.818142	0.962869	-0.147653	-0.288461	-0.893749	-1.02721	-0.339627	-0.429273	0.154562	-0.874855	-0.00558305	0.495984	0.00190425	-0.482868	-0.276615	-0.602003	-0.0809	-1.01013	-0.933609
ARMC10	0.58017	0.176767	-0.611192	-0.660162	-0.167552	0.511947	0.654085	0.293628	-0.151843	0.427165	0.539865	-0.280609	-0.261139	-0.096961	0.444837	-0.202318	0.463109	-0.492321	-0.226476	0.006567	-0.846188	-0.507937	0.324018	-0.218143	-0.0928688	0.422962	-0.612093	-0.00209427	0.0735769	0.508293	-0.701013	0.464564	0.497537	0.0646648	0.158648	-0.386164	0.560486	0.7562	0.675582	-0.0124378	-0.343122	-0.0862141	0.00209427	-0.180469	-0.300698	0.411839
SAR1B	-0.27154	0.598787	1.15239	0.304973	-0.313586	-0.215251	0.948622	0.173159	-0.318432	0.18247	-0.399309	-0.10194	0.0683823	0.191394	-0.405425	0.393869	0.637921	-0.309826	-0.111363	-0.229711	-0.304114	0.028512	-0.727967	0.805517	-0.028512	-0.145674	-0.0680389	-0.526787	-0.207357	-0.162545	0.402574	0.0923557	0.226853	0.141826	-0.803951	0.399856	0.258507	0.105681	0.81758	-0.209908	0.219864	-0.148282	-0.106842	0.331446	-0.222373	0.663954
TMEM37	0.899764	0.109945	0.433067	0.914134	-0.835461	-0.87804	-0.345649	-0.388399	-0.209938	0.960344	-1.31599	-1.04127	0.318057	0.307225	-0.578642	-1.12925	-0.959793	-0.0191102	-1.09647	0.534228	-0.244681	0.424283	-0.936344	0.804236	-0.200878	0.418457	1.00686	-0.983926	0.809206	-0.857862	0.594814	0.360238	0.876526	0.755341	0.0191102	1.45315	-1.83345	-0.285985	0.0333533	0.680969	1.09054	-0.0266957	-0.636606	0.151541	-0.644065	-1.11523
GFOD1	0.188708	0.653906	-0.630965	-0.258595	0.341482	-0.822896	0.376481	-0.585952	0.423088	0.451107	-0.302131	0.0520105	-1.00081	-0.0520105	-1.19804	-0.126179	0.57483	-0.456978	0.537189	1.41143	0.464232	-0.378623	0.305396	-0.227512	0.949549	1.02642	-0.195111	0.373909	0.688778	0.548201	-0.211453	-0.175053	-0.558928	-0.0852847	-0.761409	0.832658	-0.0761232	-0.111385	0.0640955	-0.566133	0.582098	0.742403	0.571145	0.547201	-2.36708	-0.967968
ATF6B	0.276973	-0.848418	-3.09278	-0.366294	-0.498226	0.569237	-0.988857	1.4291	0.379749	1.26862	0.359214	-0.828335	0.0606499	0.837465	-0.0151415	-0.13096	0.582655	-0.279275	0.74578	-2.82135	-0.557545	-0.247582	-0.54106	-0.594417	-0.067677	0.456937	-0.579516	0.344738	0.0151415	0.647297	0.569501	0.704287	-1.4839	-1.75362	1.27605	0.855737	-0.342432	0.0476351	1.12324	1.07774	1.23712	-0.875726	-0.230619	-0.132029	-0.274498	0.0162733
OSCAR	0.0222745	-0.970238	0.563831	-0.125834	0.311612	-0.244421	0.280684	-4.55258	1.16719	-0.796286	-0.212023	0.653935	-0.237602	0.490311	-0.531948	-0.591267	-0.839822	0.927182	-0.4478	-0.815385	0.108819	1.18739	0.873019	0.0119267	0.22519	0.03792	1.16223	1.03487	-2.80933	0.685787	0.486557	0.0525842	-0.285037	0.564042	-0.0119267	-1.00666	-0.234035	-1.43992	-0.761066	-0.439058	0.489616	-0.743868	-0.162036	0.0134475	0.0993948	-0.367661
NAALAD2	-1.73801	-0.343093	-0.632852	3.4092	-1.84552	-0.747833	-0.0255084	2.3479	2.50703	-1.05725	-0.307755	2.03081	0.180877	4.09889	-0.248284	3.01898	-1.44333	-1.78472	2.16385	1.20129	-1.68275	1.91112	3.12166	0.778657	1.21956	2.60817	1.85926	-1.42942	1.49219	-1.34567	-0.898333	-0.453089	-0.766497	1.95385	-1.63367	-1.17759	-1.74058	-1.74675	-0.385115	0.444423	-1.82036	0.0255084	1.89796	0.645151	0.342523	2.79987
GHITM	0.0769978	0.605571	0.504684	0.110147	-0.339489	0.23962	0.557099	0.521969	-0.374206	0.00707531	-0.822031	-0.0228291	-0.168092	0.483339	0.264194	-2.77029	0.899927	-0.59304	-0.176712	0.55041	-0.695615	-0.630202	-0.217646	0.463343	-0.15549	-0.0193157	-0.404094	-0.679441	0.787278	0.0411472	0.0482225	0.157419	0.374816	-0.0286331	-0.116877	0.184104	-0.0419416	-0.122498	0.623966	-0.00707531	0.141876	0.793372	0.0838442	-0.138665	-0.324071	-0.878321
WWC1	-0.617706	1.98563	0.268222	-1.4861	1.96951	0.192158	0.695667	1.03054	1.35294	-1.00462	1.37983	-0.316442	1.30068	-0.741861	1.06347	1.37231	0.372227	-0.640725	0.0404263	-0.677724	1.94733	0.485012	-0.119719	0.542538	1.95252	-0.861734	-1.28749	-0.654532	2.38923	-0.935323	-0.14736	-0.683267	-2.06754	-0.222375	0.492448	-1.34742	-0.502291	0.872573	1.55052	-0.0404258	0.602473	-1.59715	-0.277046	3.11492	-0.700879	-0.624689
LINC00537	-0.341027	0.535454	-0.248991	0.0773227	-0.0550244	-0.64922	0.876803	0.196538	0.86674	-0.477197	-0.267196	-1.3425	-0.402196	-1.02874	1.20701	0.475566	0.630864	0.392605	-0.0692389	-0.251811	0.44464	0.32137	0.0456617	0.270058	0.802358	-0.521745	-0.948814	0.156039	0.309262	-0.133284	-0.0240114	0.695828	-0.286934	-0.286188	0.0297368	-0.155651	-0.122697	0.0240114	-0.628543	0.795078	-0.120255	0.0535338	0.455555	-0.28567	-0.218212	0.401139
CD80	-1.02203	0.510287	0.574699	0.13027	0.884198	-0.772536	-0.000918	-0.166368	1.38012	-0.388533	-0.308926	0.940207	0.560016	0.280237	0.178458	0.312315	-1.48887	0.670088	0.75426	-0.317819	1.93842	1.25489	1.46666	-0.504397	0.464443	0.15695	-0.0423057	0.680821	-0.0847704	-0.538424	-0.107849	-0.697775	-0.231947	0.355157	-0.357196	-1.0557	-0.480081	0.204393	0.0348933	-1.00383	-0.318259	-0.794451	-0.886415	0.000918	0.700351	-0.101988
CNNM2	0.784607	-0.869185	1.13033	1.10724	-0.290533	-0.247593	-0.838953	0.042465	0.613877	-0.948116	-0.641457	-0.20465	1.09902	1.07061	-0.373347	-1.17327	-0.573312	0.0854209	-0.27675	-0.972752	-0.0976174	0.791585	-0.349867	0.307766	-0.540736	1.07543	1.67113	-0.618554	0.128838	-0.996013	1.54813	0.106436	-0.00632644	0.986568	-0.457463	1.41414	-0.280164	0.346394	0.00632644	0.102637	0.687386	-0.602804	0.50423	0.106016	-0.0805147	-0.20216
OLFM3	1.93218	-0.295314	-0.489522	-0.00518417	1.83822	2.43519	-1.82018	1.55951	2.55884	0.399128	-2.31415	1.3751	0.981699	-1.63059	-1.08694	2.71147	-0.168364	1.97269	-1.38658	-2.28462	-2.36875	-0.149265	-1.03392	-2.28359	-1.94829	0.115788	1.02877	0.856809	-1.90027	0.731095	2.3018	0.968938	-1.2844	-2.12458	2.7585	-1.1679	-0.584692	-2.28564	2.67833	0.00518417	-2.21933	-1.18009	0.442982	2.32557	0.715614	0.0812726
VSTM2A	-0.363957	0.0930285	2.00759	-0.482635	-0.852993	-1.72153	2.39893	-0.254277	0.679109	0.0338426	-0.555883	1.76107	0.238459	-0.427103	-0.210798	-0.158611	-0.20646	-0.566514	2.76417	-0.479941	-0.570809	-0.0338426	2.84398	1.1943	2.45774	-1.96938	3.88814	-1.00528	2.66747	-0.744582	0.0371709	0.114644	1.43419	0.952338	-0.967582	1.50348	2.93484	0.628264	-0.359743	-0.121959	0.58469	-0.117135	-0.373828	0.855046	0.718467	-0.31012
DPYD	-0.780705	0.521577	-0.0309162	0.146454	1.10888	-0.633843	0.177209	0.0729284	0.691066	-1.09566	1.897	-1.56542	-0.311648	0.0774775	0.398372	-0.550832	-1.33035	-0.362988	0.0309162	-0.319732	-0.781441	2.006	-0.824255	3.427	0.781388	-1.88424	-1.9045	0.0863056	-0.723057	1.55797	-1.84844	-1.79632	2.06906	0.219078	3.12459	-1.44645	-0.733692	-0.867107	-1.35039	-1.85986	-1.15749	1.85091	1.11001	0.566967	0.264338	0.559486
RHOF	-0.511777	-0.0431228	-0.300968	0.263197	0.342663	-0.0247102	0.0651364	-0.15953	0.811524	0.131886	-0.0570526	-1.04232	0.220509	-0.0475674	-0.207772	0.523183	0.942331	-0.402207	-0.0663242	0.578507	-0.0107875	0.080935	-0.28443	-0.180461	0.402765	0.0426521	-0.657161	-0.1775	0.0837121	0.606602	-0.298851	0.358724	0.142529	0.118114	-1.13167	0.112885	-0.529882	-0.766633	-0.12399	-0.0938745	-0.652617	0.0107875	0.13053	0.554399	0.668547	0.824819
DNAH14	0.66344	-0.117953	2.72488	2.43191	-0.273721	-1.21769	-1.67559	-1.74695	-0.280928	2.3237	-0.920387	-1.80846	-0.40982	1.20689	-1.45915	1.75908	-0.264122	-1.82534	1.44349	0.117952	-1.91537	1.68893	-0.701422	-1.2732	-1.81705	2.75823	0.456838	2.38557	3.60714	1.55248	2.75414	-1.75876	1.32427	-1.84423	-0.593975	-1.27753	-0.146344	2.06762	-1.64507	-0.453966	1.48322	1.66541	3.50972	0.951749	2.8468	0.59705
SLC25A48	-0.108383	0.195555	-0.225948	0.930243	0.272074	-1.0249	0.485002	0.150521	0.505011	-0.284785	0.433306	0.489997	0.654049	-0.904788	0.510362	0.678314	-0.249055	0.637632	0.414562	0.145725	-0.06653	-0.205951	0.312956	0.342059	0.164736	-0.441457	-0.17266	0.0748317	-0.129703	-0.935322	-2.00856	0.0717022	-0.39554	-0.558596	-2.10038	0.06653	-0.332298	-1.40186	-1.09691	-0.545883	-2.30335	0.343953	0.747563	-0.666513	-0.158901	0.35878
APOBEC4	-1.45748	-0.387367	-0.839534	0.0704682	-0.243939	0.214826	0.660699	-0.0590298	1.17039	-1.93073	-1.2448	-0.153331	-0.550773	-0.0508487	0.990293	-0.988495	-0.53541	-0.301029	0.145779	0.570654	-0.181415	0.770359	0.868939	-0.329443	-0.230851	0.233849	-0.396786	0.178702	0.787119	0.0422618	0.334193	0.0874026	-0.229485	-0.954826	0.242185	0.611194	0.0236175	-0.609616	0.811119	-1.06415	-0.0999353	-0.0236175	0.68452	0.362135	0.486557	1.02965
CFAP97	2.42533	-1.034	-0.288921	-1.73781	1.15219	0.919326	-0.8976	-0.395626	2.22124	0.0929785	-2.05585	-0.882663	0.148147	2.21082	2.0931	2.58591	-0.695112	2.86585	-0.889445	-1.6782	1.09378	-1.83263	0.985531	0.92938	-2.30681	-0.948992	-0.338555	2.32879	-1.52145	-1.97675	2.4535	-1.81855	-2.28327	0.591317	0.97892	-2.08079	1.39478	-1.23932	1.93254	1.15125	-0.36448	2.15478	-0.224515	0.114772	-0.0929785	0.107292
ATP11B	0.302762	0.374238	-0.231637	0.336325	-0.560739	-0.0251064	0.0358634	-0.526468	0.399149	-0.427289	0.229337	0.329603	0.508243	0.542804	0.225456	-0.19442	0.430806	-0.18704	0.16293	-0.20729	-0.155499	0.0195298	-0.185452	-0.421519	0.31419	-0.0597396	-0.193412	-0.68279	0.157056	0.102712	-0.443007	0.383744	0.129701	-0.197879	-0.215705	0.00766468	-0.0573597	0.555567	-0.820073	-0.00766468	0.224877	0.869173	-0.0524554	-0.0232029	-0.310382	0.278001
GPR62	-1.13496	0.995952	-0.00154924	-0.203917	-1.72442	-1.09012	1.61268	0.186116	0.259246	-0.716933	-1.09189	-1.42796	-0.785457	-0.556709	1.27698	1.06942	-0.49006	1.25307	-0.0193934	1.01511	-0.41137	-0.161711	-0.157714	1.57614	0.962201	1.60998	0.574003	-0.0403481	0.700233	-1.91002	0.6871	0.0360703	-1.35466	-1.71823	0.212441	1.10607	0.00154877	0.817968	0.115672	2.59826	-1.30554	-0.0290394	0.904704	-0.6051	0.290687	-0.0352778
SPPL3	-0.253195	0.381268	0.0367618	2.02504	2.31234	0.238779	-0.847266	0.00962925	-0.154757	2.03627	1.80105	-0.00962925	2.68063	0.790331	-0.518716	-0.178736	-0.727244	0.0664544	-0.174192	-0.391019	1.56455	-0.24563	-0.753692	0.554763	0.839652	-0.570937	1.44751	-0.805192	0.333703	0.964483	-1.39748	-1.40884	-1.41055	-0.620156	-0.493579	-1.07778	-1.03877	-0.60763	0.381593	-1.65331	-0.498844	1.69386	1.73675	2.60828	0.0513108	2.24403
KCTD17	-0.0431247	-1.43849	0.644922	0.455062	0.346263	-1.48531	0.644607	1.13045	1.25983	-0.188388	0.395916	0.00746822	0.248804	-1.55811	0.459934	-0.666047	0.742326	-1.14704	0.621382	-1.50248	-0.417902	-0.257751	-0.980588	1.29889	-0.0627885	-1.52479	-0.395336	0.23111	-0.167841	0.821006	-2.00564	-1.92687	0.845403	-0.00746822	-0.376955	-1.43099	-1.99881	0.587091	0.792335	0.317465	1.01913	-1.2693	0.144646	1.40857	1.31548	-1.46488
SUV39H2	0.0230575	0.721771	0.0268865	-0.483708	0.243004	0.648657	0.0347295	-0.0692906	-1.00604	1.2016	0.378468	1.04539	-0.340241	0.23033	0.26615	-0.160432	0.46037	-1.08901	0.0126071	0.477217	-0.0258994	-1.06423	0.162397	0.280601	0.416131	-0.0126071	-1.04626	-0.242759	-0.0334105	0.061976	-0.490276	-0.420901	-0.0963063	-0.3106	-0.333003	-0.461408	0.77338	0.63489	0.869763	-0.194628	-0.705109	1.31894	-0.502335	-0.0257435	0.246639	-0.567565
CYB5R3	0.392793	-0.617913	-0.183538	0.0116065	0.0533068	0.154233	-0.458074	0.263414	0.273095	0.00163007	-0.414635	0.439489	-0.0836837	-0.2555	-0.308456	-0.662166	-0.486574	0.446139	-0.296058	-0.107385	-0.412068	0.570681	0.426957	0.367491	-0.0830228	-0.332882	0.306962	0.079036	-0.035692	0.734549	0.637557	0.41405	-0.0159175	0.444895	0.0780327	0.635704	-0.375651	0.00154328	-0.237167	0.0214427	0.389539	-0.275145	-0.0165536	-0.236252	-0.00154328	-0.0110991
BPNT1	0.792006	0.23829	-0.769519	0.185563	0.082078	0.398157	0.473385	0.629134	-0.284012	0.204867	0.0147066	-0.538461	0.670434	0.452347	-0.146754	0.330589	1.21371	0.538528	-0.39416	-0.239048	0.056242	-0.121222	-0.108034	1.84988	-0.344257	0.738874	-0.131654	-0.31958	0.252387	-0.849564	0.588295	-0.671985	-0.365263	-0.341805	0.0705462	-0.0635576	0.280885	0.347096	0.622753	-0.0147066	-0.658948	-0.363596	-1.23654	-0.821858	-1.07403	-1.0018
MYO18B	0.169319	0.58521	-0.516639	-0.592475	-2.52306	0.316597	1.48411	0.34097	1.27878	-2.10119	0.571648	-0.836981	0.890366	0.583015	1.93075	-1.24638	0.161801	-1.09105	-1.71284	1.20959	-0.271488	0.381665	-3.27249	1.28969	0.065094	-0.0540581	-1.03045	-0.403593	-0.0458245	-0.3585	-3.48069	-0.0645194	-2.78999	-1.68796	1.40153	-0.123953	-0.54451	0.614718	0.890503	-0.409964	0.503798	0.592133	-3.17475	1.65788	0.441139	0.0458248
ETFBKMT	0.143316	-0.0876851	0.810087	0.177421	-0.336464	0.36208	-0.29791	-0.683488	0.237681	-0.201078	-0.866802	-0.238786	0.647189	-0.0139627	-0.534283	-0.76575	-1.35211	-0.0418944	-0.991317	-0.214939	0.148745	0.517648	-0.0371642	0.819705	-0.342558	0.15179	0.905602	0.413075	0.357254	-0.492225	-0.363721	0.291966	0.411199	0.916881	0.279642	1.27837	-0.561363	-0.251825	0.507395	0.0139627	0.494995	0.10924	-0.492641	-0.282507	-0.352216	0.022264
DRC3	-1.29567	0.472291	0.536547	-0.177996	-1.42029	1.59627	-0.0828443	-0.274995	0.721745	-1.08548	0.485904	-0.473609	-0.473046	-0.402017	0.078342	-0.660207	-0.30845	-0.810748	-0.595218	0.525682	0.711292	-0.315592	-0.398798	2.36243	-0.778813	1.37771	0.625026	1.54451	-0.671226	1.23347	-0.198629	2.25631	-0.514095	-0.26175	1.49693	1.67905	1.95453	2.20148	0.582707	2.10365	-0.49766	-0.9042	0.505013	0.631572	-0.078342	1.5648
LENG9	-0.3588	-0.724367	-0.600066	0.460064	-0.052166	0.126522	-0.849916	-0.640492	-2.04906	0.437872	0.211375	-0.278633	0.13335	0.233868	0.534612	0.216598	0.373764	-0.390006	-0.117368	-0.00641537	-0.173843	-0.378132	-0.719875	0.946617	0.0362835	-0.104165	-0.225749	-2.49231	-0.849692	-0.781553	-0.469119	0.145304	-1.04968	0.00641537	0.191503	0.45731	0.200407	0.0237031	-0.615567	0.757316	-0.254386	0.0605974	0.953665	1.26417	0.564644	1.21248
SYMPK	-0.3058	0.776947	0.10409	0.114279	0.562866	-0.249313	-0.354703	-0.281157	0.171719	-0.262743	0.263341	0.123976	-0.105452	-0.230858	0.822483	0.577668	-0.215305	0.396705	0.768858	0.0340662	0.777442	0.393416	0.763488	-0.0340662	0.0694342	-0.699824	-0.0481949	0.0620194	-0.545179	-0.515223	-0.728846	-0.548849	-0.148816	-0.483333	-0.0736551	-0.901349	-0.898229	-0.261681	-0.0560255	0.0751314	-0.0950003	0.818267	0.807886	0.6702	0.377438	0.93008
LIG3	0.326457	0.383013	0.347217	-0.195961	0.406696	-0.155005	-0.543814	-0.00413895	-0.287408	0.420766	0.502508	1.04993	0.143667	-0.680945	0.407627	0.313501	0.263865	-0.445524	-0.0648956	1.00303	-0.153513	-0.433645	-0.102535	0.00413895	-0.182741	0.630433	-0.490803	0.318536	0.494349	-0.601463	-0.215783	-0.334467	-0.0610886	-0.478024	-0.353601	-0.0634794	-0.0444727	-0.473978	0.706107	0.404608	-0.148546	0.883023	0.0927153	0.7697	0.807578	0.912121
CNKSR2	-2.20965	0.112594	0.340392	-1.41743	0.0434761	-3.17855	-1.66535	-0.946653	2.22109	-0.142489	-2.78879	0.717453	-1.44449	0.975048	-0.0426469	-1.50352	-0.106045	0.0426469	1.16107	1.98167	-2.50427	-0.271982	-0.245347	0.583369	-1.21438	0.391706	0.605958	1.35261	-1.20273	0.169436	-2.70097	0.930058	-2.27891	-1.68813	0.297432	1.17936	0.693969	-1.41631	-1.84675	1.80623	0.479341	0.439999	-1.99774	0.872253	-1.84066	0.901124
LOC100287896	0.226683	-0.250907	0.471711	0.161881	-0.381613	-0.580868	-0.361783	-0.191849	-0.584737	-1.10165	0.0178347	-0.144741	-0.0603962	-0.0130301	0.559724	-0.478552	-0.0503063	0.367896	-0.569092	0.93092	-0.283382	-0.890475	-0.506632	1.57499	-0.493144	0.207779	-0.264483	0.147122	0.316676	-0.20346	-0.911577	0.415923	-0.0313187	0.338047	0.53725	0.438738	1.28631	0.321887	0.292162	0.74717	0.195658	0.0130301	-0.947845	-0.311351	0.0490899	0.71154
ANKMY1	0.53699	1.27267	0.0298061	2.1406	1.01005	1.02484	0.31566	1.98171	1.48627	-0.924085	-1.06121	-0.961698	-0.0298061	-2.35849	-0.0938301	-0.682919	-2.0476	1.98573	-2.6	-1.93931	0.568019	0.461088	-1.45997	1.51744	-1.47698	-0.956628	1.05976	-0.300241	-0.480115	-0.796717	0.992398	1.16582	-1.85736	-0.92067	-3.15733	-0.504722	0.973309	0.632267	-0.649975	1.09686	-2.2237	0.0525241	0.0928493	2.82453	1.64333	-0.195368
RUBCN	1.60484	1.10603	-0.431685	-0.997438	-0.177586	-1.14505	0.367244	-0.632984	2.18584	-0.809457	0.376202	1.81443	-1.47455	-0.576619	1.23911	0.0411258	-0.928756	2.3611	-0.445491	1.26406	-0.787087	-1.73707	-0.521089	1.76677	2.30069	-0.883483	-0.644559	-1.97058	1.30023	-0.227117	-0.331472	2.16586	1.28364	1.53882	0.772621	0.0235095	-1.52056	1.19718	1.32074	0.836594	1.57103	-1.04279	-1.08815	1.92831	-0.0235095	-0.973886
SERPINB8	-0.140704	-0.898057	-0.708864	-0.414013	-0.00464463	-1.05222	0.195249	0.377578	0.27083	0.145267	-0.103812	-0.269237	-0.119927	0.00464463	-0.385147	0.847703	-0.12565	-0.877224	-0.256911	0.171884	0.442885	0.459654	0.715426	-0.54964	0.747399	-0.0901444	0.268428	0.776118	-0.451016	-0.368143	1.00401	0.903077	0.199935	-0.156988	0.695766	0.863899	0.375762	0.711833	-0.337026	0.787105	-0.404081	-0.445382	0.405619	0.744291	-0.252455	-0.236234
SIRPB1	-0.404281	0.0269318	0.00338078	-0.0374069	0.710979	-1.46748	-0.419164	0.527171	2.06816	-0.430112	-0.711513	-0.626372	-0.262994	0.0784645	-0.633982	-0.196458	-0.465359	0.345101	-1.41507	-0.313331	0.807621	2.14556	2.40213	-0.619249	1.08375	0.441698	1.25777	-0.357237	-2.34699	-0.121706	0.239501	-0.235703	0.012054	1.8368	0.261487	0.131297	-0.208698	-0.00338078	0.271799	0.984658	0.708461	-1.84798	-1.51414	0.150656	0.682045	-0.513029
ZNF57	0.565686	0.928938	0.745644	-0.253015	-0.461774	-0.29435	-0.425844	-0.164893	-0.225836	0.292726	-0.00189972	-1.30913	-0.106994	0.00145149	0.369154	1.08033	0.589535	-0.323575	-0.00145149	-0.221047	-1.40329	-0.03092	-0.44352	-0.312099	-0.122024	-0.280747	0.0133181	-0.280684	0.821003	0.160089	0.272532	-0.130062	0.507899	-0.124928	0.263593	0.420719	-1.04151	-0.112844	0.767126	0.538627	0.325636	0.0310068	0.468228	0.63047	0.471548	1.54412
NPAS3	-0.565918	0.0303235	-0.555761	2.54344	-0.339095	-1.23046	0.820194	0.874192	2.82183	-0.0563631	-0.498985	-0.395719	0.124394	-0.167869	0.644426	-0.030324	-0.165377	-0.165532	-1.29475	-0.100392	1.73466	1.83252	-0.3308	-0.727512	0.229143	1.72457	0.385273	0.262504	-0.404331	-0.106555	0.286172	0.162645	2.08101	0.108253	-1.15714	2.36809	0.23792	-0.243938	0.202021	2.26806	0.067122	-1.19666	-0.193039	1.84242	-0.902203	-0.724402
ZFYVE16	-0.499285	-0.710594	0.0889542	1.2162	0.939974	-0.00826287	0.0367339	-0.340184	-0.1376	1.07776	0.943615	0.463148	0.167654	0.340787	1.09279	0.826131	-0.222428	1.38356	0.339185	0.178501	0.637531	0.851309	1.14249	0.00826287	0.358664	-0.0378082	-0.04018	0.718295	-1.13317	-0.786548	-0.0965383	-0.759018	-0.218313	-1.14275	-0.366433	-0.430398	-0.731153	-0.202274	-0.65285	-0.343792	-0.0237558	0.0514567	0.478345	0.35849	-0.547308	-0.472785
RPRML	2.04738	1.71777	0.459909	1.09767	-0.714563	0.666795	-0.129394	0.570821	0.150549	2.10003	-0.00442362	-0.544442	-0.645862	-0.223152	2.69117	2.00494	-0.339071	1.84966	2.02263	-0.505293	1.11651	1.13613	-0.911071	-0.483505	2.06572	2.34711	-1.09998	1.03621	1.37624	-1.76698	0.821687	-1.2598	-2.58532	-1.68621	-1.7817	0.0570169	-2.16294	-1.43413	-1.53721	-1.48279	-0.191512	1.22891	1.45221	0.00442362	-2.22956	-0.499983
CNST	-0.0220742	0.404435	0.421237	-0.0160108	-0.014142	0.0905972	0.00313568	-0.310846	0.169983	-0.0730252	0.0631409	-0.248801	-0.170174	0.109192	-0.412088	0.19327	-0.0996327	0.17186	0.270961	-0.301541	0.62482	0.290648	0.118254	0.358959	-0.162576	0.323294	-0.288566	-0.109581	-0.147462	0.165971	0.417066	-0.217389	-0.0742068	-0.0126452	0.320245	0.000922	-0.000922	-0.136511	0.156613	-0.67866	0.00519419	0.410023	-0.955006	-0.13255	0.00550079	-0.0869575
NUMA1	1.83884	3.20626	-0.194774	-0.250486	-1.75025	-1.17286	1.76476	0.222004	1.48241	0.718275	0.0475969	-0.947373	-0.600681	-0.319922	3.25667	-4.6167	-0.567258	4.62464	3.59952	-1.47755	-2.94829	0.0248699	-2.59817	0.782741	-0.0248704	0.587792	3.30068	-2.58704	-2.04223	-2.09888	-2.5244	1.06645	3.50759	2.42971	3.32216	-0.725191	-4.28985	-0.627162	4.27975	3.1857	-2.02092	-4.03961	0.692646	4.30547	3.07903	-2.21496
FAM151A	3.84087	-1.32268	-0.623857	-0.263958	-0.626204	-0.668261	0.128567	-0.605823	1.46479	0.955582	-0.0341425	2.49609	-0.408313	0.436165	-0.0779438	2.54879	0.454595	-0.166656	-0.0419893	-0.0939612	-0.138512	-0.970793	-0.682156	0.586112	1.01482	-0.485641	-0.576745	0.034142	-0.783835	2.03856	0.697132	0.962906	2.07827	-0.293698	1.1245	0.480716	0.28072	-0.257196	0.511743	0.43678	0.513909	-0.120576	1.2764	-0.735045	0.291011	-0.742526
SYCE1	-0.515274	0.854465	1.12074	-0.149998	-0.710493	-0.202176	-1.44629	1.42136	1.00464	-0.287278	1.03066	1.85347	0.0769749	-1.4338	-1.06167	1.43881	1.90545	-0.557461	-0.444175	2.66771	-0.447953	0.469038	1.16348	-1.25562	-0.721786	-0.0838146	-1.16808	2.027	-0.511601	-1.37305	-1.63112	-0.278348	0.569015	0.319806	-0.554186	-0.0294228	1.19548	-1.3902	0.443328	0.926749	0.0294228	2.24981	0.44332	-0.669169	0.451965	1.45741
CMTM4	0.023483	-0.383919	-0.419356	0.240555	-0.873703	0.0815547	0.986328	0.0761678	-0.0740335	-0.0987122	-0.131667	0.364769	-0.935692	0.394938	0.617721	0.259467	-0.0202095	-0.598597	0.128981	0.25848	-0.73194	-0.457427	-0.409095	0.299233	-0.0174091	0.00380397	-0.0942609	-0.840518	-0.122583	0.270265	0.588191	0.487084	-0.269213	0.425478	0.704996	0.510048	-0.00380397	0.561521	0.62558	1.30868	0.803879	-0.916834	-0.504092	-0.335387	-0.487739	-0.631668
LAPTM4B	1.05745	1.70623	-0.72933	-1.48997	0.0295358	0.469065	-3.32118	1.05777	-1.06485	0.382202	0.12165	-0.139597	-1.14574	-0.511934	-0.613245	-1.02841	-0.0280547	-0.0845323	0.329376	0.0624242	0.258354	-0.911344	-0.879521	0.251212	0.286214	-0.127241	-1.16631	0.275829	-0.128972	0.550568	-0.473582	0.0898528	0.272383	0.752395	0.768761	-0.153221	1.18351	0.0029006	1.36948	-0.0029006	-0.679654	0.761447	-0.261666	-0.851795	1.05571	-1.27552
CCDC187	-0.446023	-0.0656891	1.27358	0.745531	-0.155358	-0.561965	0.0653362	0.191536	0.131125	0.0108223	-0.20839	-0.336552	0.133152	0.181756	0.163724	-0.166687	-0.0616102	-0.183406	-0.228064	0.0700302	-0.236811	0.102263	-0.0478439	-0.162781	0.251222	-0.393993	-0.26759	-0.427927	-0.0108223	0.842495	0.318549	-0.110723	2.15423	1.78067	1.40716	0.334251	-0.712423	-0.379622	0.630692	-0.294216	1.13371	-0.225085	-0.143307	0.525646	0.559999	0.136659
PACSIN2	0.272313	-0.71283	0.230011	0.180982	-0.490631	0.00653601	0.168028	0.711144	0.564277	0.228687	-0.184106	-0.466572	-0.122193	-0.0510163	-0.427177	-0.153948	0.526726	0.262763	-0.00653601	-0.38142	-1.01481	-0.582572	-0.249403	-0.0863891	-0.7708	-0.631884	0.453612	-0.27711	0.210515	0.865642	1.34227	1.00004	0.943515	1.20106	0.666518	1.13379	-0.434195	0.505157	0.791675	0.670106	1.04704	-0.436733	-0.158821	-0.229803	-0.499275	-0.0242453
CCNY	-1.36799	-1.51056	0.879729	1.03651	0.62879	-0.0210834	0.415561	-0.976476	0.544372	0.207198	0.0652728	0.466361	-1.18779	-0.141279	0.198232	-0.647066	0.795925	-0.358983	-1.10749	2.65747	1.67027	1.36825	1.12643	0.800405	-1.19903	-2.03909	-1.47493	-0.815641	-0.472612	1.01834	0.0210834	-0.366148	-0.279635	1.22224	1.93334	-0.226222	1.27517	1.85022	-0.950102	-1.06656	0.452197	-0.214174	-0.645454	1.1986	-0.975376	-0.783196
TYMS	0.577221	0.146718	0.297345	-0.000167	-0.275062	1.11907	0.635486	-0.246397	-0.0166984	0.809628	0.501498	0.819642	0.0512805	-0.176741	-0.947	-0.0992274	-0.409419	-0.97639	-0.109519	0.000167	1.097	0.15048	-0.539216	-0.232052	-0.480912	0.110039	-0.196811	-0.3376	-1.09008	-0.167508	0.0740171	0.00289202	0.198667	-0.212289	0.124589	-0.0335259	1.12548	0.751913	-0.179777	0.60497	0.352377	0.219155	0.190844	-0.332064	-0.38203	-0.0899148
L3MBTL4	0.27527	0.554667	-1.45894	-1.15159	-0.165147	0.145094	0.525763	0.567647	1.12044	-0.659164	0.348052	-1.13477	0.654498	-0.387717	-0.66106	-0.270087	1.04721	-0.97441	-0.571777	0.473021	-0.361009	-0.371703	-0.529666	-0.848985	0.406409	0.325126	-0.712176	-0.716984	0.769167	0.00327539	0.252965	-0.00327539	0.515508	-0.176227	0.152158	-0.908335	-0.0573196	0.366777	-0.636072	0.372211	0.388448	-0.212725	0.0414274	0.868011	-0.783224	0.884636
CDH7	-1.79469	-0.473204	2.80056	0.367011	2.84425	-2.14293	1.74864	2.42176	0.0503302	-1.21277	-0.893105	3.13816	-1.50142	-0.668385	1.87688	-2.15693	0.332596	-1.68601	-0.981876	-1.76828	-1.79769	-0.970872	2.34451	0.246837	-0.949627	1.56514	2.81903	0.2012	1.48285	-2.16139	-1.7045	0.46163	-1.58654	-1.86197	-2.2022	-2.15458	2.16338	-0.0828361	-1.42439	0.980097	2.58605	2.17691	2.3714	2.49207	-0.0503297	0.244818
NALCN	1.04668	-1.25562	-0.370604	-1.63252	0.452907	1.12965	2.00529	-1.05675	2.5971	0.0818024	-1.5327	-1.89111	-1.24762	0.816465	1.43352	1.13016	-1.67963	1.0917	-2.32307	-2.03653	-0.927685	-1.40493	0.490041	1.26796	1.07262	-2.02488	0.133325	-1.13024	-1.30199	1.91077	0.809543	-1.58458	-2.03166	1.84648	0.618015	0.785871	-1.6276	1.16744	-1.70467	0.590023	-1.48292	-0.834723	-0.778161	2.57058	0.320386	-0.0818019
SCARA5	2.1403	0.60216	1.15769	1.25315	2.09266	-0.0936914	-1.348	0.568588	-1.51232	-0.437473	0.0468025	-1.65387	-1.44144	-0.0132971	-0.47803	1.25666	1.45576	-2.22605	-0.54738	-0.184034	-0.289997	0.166843	0.0132971	-1.27476	1.57228	2.09049	-0.158851	-0.438999	1.38418	0.128474	1.82816	-1.10352	0.717457	0.67722	-1.09288	-0.647572	0.458405	1.06784	-0.733264	0.47195	1.08903	-0.752153	0.118977	-1.16266	-1.69018	-0.343135
OR2L13	-1.33861	2.74987	3.06668	1.79742	2.41666	-1.35067	0.399276	-0.956732	-0.116305	-0.483908	-1.35835	-0.77855	-1.35988	0.357628	0.116306	0.249084	1.20421	-0.157466	2.55096	-1.32882	-1.47535	-1.47878	-1.27406	0.235355	-0.628466	1.74086	3.29453	-1.41593	-0.820848	1.95583	3.27437	-1.07613	-1.3535	-1.40421	0.316089	1.97188	2.60908	-1.34735	-0.68983	-1.20136	-1.25379	0.293711	0.705262	1.04455	0.741921	2.63125
CALHM3	0.891802	1.54408	1.67427	0.244736	0.490932	-0.911289	0.591035	-1.68404	1.5666	1.00051	1.41347	0.821981	1.71291	1.93926	0.218375	-0.990871	2.94156	-0.693994	-1.96991	2.04797	0.872609	-0.505417	-0.638701	-0.0996337	-1.43662	-1.51042	1.16877	-0.798713	-1.70235	-0.952364	-0.338156	-1.18905	-0.27039	0.623114	-0.811941	-0.532026	2.4647	-1.86998	-2.26197	0.313705	-0.239908	-0.215075	0.783494	-0.111368	1.59463	0.0996337
GLYATL2	-0.804347	0.447831	0.646336	0.0142756	-0.147868	0.319489	0.238116	-0.193662	1.09514	-1.84952	-0.126725	-0.0142756	-1.39912	-0.325198	-0.503846	0.926035	-0.306236	0.340952	0.638944	0.142765	0.143213	0.520619	-0.289631	-0.241853	0.78919	-1.05141	-0.605353	0.998444	-0.939456	-0.440669	0.291127	-0.407082	-0.289412	-1.31767	0.325775	0.547996	1.01268	0.324377	-0.148507	1.15383	0.186213	-0.413223	-0.569025	0.309882	0.237826	-2.1681
RELL1	-0.686689	-0.257233	-0.39539	-0.269224	0.273805	0.200434	-0.446161	0.704539	1.17543	-0.402306	0.645657	0.148244	-0.0040226	-0.707791	-0.0370846	0.93253	-0.518813	0.0842242	0.65944	0.167095	0.454283	0.248951	-0.402473	0.633279	0.909695	0.813399	0.559684	-0.728783	-0.804115	-0.0077343	-0.528134	-0.841759	-0.805943	0.0417576	0.00402308	0.371041	-0.23529	-0.815731	0.0265026	-0.305848	-0.53925	-0.120838	-0.176664	0.541656	0.107128	1.98498
LINC00593	-1.0939	0.419927	-0.9909	0.882328	-0.38492	0.0689526	2.59346	-0.182456	0.3179	-1.12853	-0.17299	-1.12444	0.723206	-1.0927	3.21872	0.276925	-0.362165	0.587239	0.221451	0.0353389	-0.981973	-0.0353389	0.830603	-0.382085	-1.8019	0.923118	0.42473	0.519582	-0.273226	0.565712	-1.01686	-1.12864	1.2336	-0.257607	-0.060678	-1.12337	-1.53016	0.320664	0.0377712	-0.175182	0.858488	-0.460489	1.58222	0.075243	-0.474545	0.154829
PDE4D	-0.29789	-0.417904	1.36927	0.812186	-0.628156	-0.119435	-1.04314	0.382401	0.505241	-0.993636	-1.02201	-0.52547	0.749509	0.842478	-1.1361	0.39473	0.383479	-0.067776	0.423559	0.0180209	-0.410496	0.733306	-1.08365	1.0652	-0.123746	-0.703441	1.25474	-0.0180209	0.371117	0.214434	1.21175	1.10146	-0.538692	0.984792	-0.522075	1.60342	0.261801	-0.483704	-0.277178	1.23505	0.622042	-0.240686	-0.390928	-0.137644	-0.0629427	0.923519
SLC6A11	-2.3866	0.0397482	-1.45753	2.37105	-0.160615	-1.22895	-0.257514	-0.986708	3.0033	-1.92212	1.34668	1.64005	2.61937	1.90256	1.35129	2.26337	0.595885	-2.54598	-1.0283	-0.0397482	2.74708	-1.1742	1.89223	-0.362643	-1.21254	0.573088	-0.368011	1.86805	-2.68754	-0.712494	1.56497	-0.987155	-0.724343	2.71424	-0.752686	1.6305	1.93337	2.64073	-1.272	-0.702494	1.47887	1.56243	2.23685	2.79823	-0.593181	-0.298033
RABGAP1L	-1.45692	2.91727	-0.148162	-0.420778	0.136487	2.52937	-0.0199604	-0.103198	3.09779	-0.81318	-0.731001	0.364138	1.12663	-0.0942173	1.92852	-0.429098	-0.457392	2.11113	-1.55404	-1.1005	0.389932	0.0741472	2.41138	-0.875113	-0.334231	-1.53134	-0.600291	1.16586	0.160687	3.4071	0.0966482	-0.199948	-1.20824	0.548539	0.0199604	-0.134697	-1.18005	1.97825	-0.125948	-0.29314	-0.0762425	1.3783	2.29582	3.02864	2.78079	0.505567
SLC9A1	1.89028	1.99597	-1.30362	1.8148	-0.404792	0.974635	0.041369	2.04298	2.27615	2.49369	1.31187	-1.53083	0.855156	0.170555	-0.440023	-0.041369	2.11079	-0.341378	-0.558238	0.136818	-0.281416	-0.724896	-0.645373	0.247995	-1.42768	0.569772	2.37616	-0.341023	-0.961891	1.03702	2.5242	2.56328	2.35814	2.0636	-0.974959	-0.786486	2.30868	0.198537	-0.96397	-0.0643744	-0.752269	-0.819462	-0.105924	-0.890912	-0.265194	-0.742095
LINC02363	-0.527396	-2.3921	0.73423	0.598101	-0.695339	-0.42816	0.414008	1.06587	1.00696	-0.403262	-1.14915	-1.83024	0.415088	0.759948	0.709369	-0.0553372	-0.506696	0.0533865	0.175087	0.0747559	0.186905	0.397994	-0.00288415	0.609057	1.17982	-0.254452	0.413891	-0.158779	-0.144105	-0.592232	0.0220382	-1.11053	-0.781572	0.30817	-0.455728	0.447893	-0.265799	-0.053313	-2.63014	1.48314	-0.327549	0.00288415	-0.379376	0.547548	-0.125768	0.278566
INPP5A	0.608514	-0.781673	-0.0991776	-0.347966	-0.48834	-0.117489	0.0621459	0.382795	-0.153418	0.447796	-0.372491	-0.0648272	-0.422525	-0.436706	-0.106527	-0.875525	-0.0162966	-0.0273716	0.0858657	0.321136	-0.374561	0.040611	-0.259728	0.325432	-0.147453	-0.11253	0.307459	-0.242147	0.112305	0.562792	0.629722	0.408849	0.283826	0.129666	0.720105	0.201915	0.6214	0.291667	0.121554	0.285977	0.569927	-0.149893	0.0162966	-0.694597	-0.174756	-1.0461
UBE2DNL	-0.544842	0.827791	-1.84235	0.459635	0.840345	-2.77449	0.135196	-1.55087	0.744329	1.06104	1.22813	-2.26948	-0.788864	0.725605	-0.390046	0.407293	0.0281658	1.30099	-1.65862	1.21426	0.519772	0.145555	-2.25864	1.18038	-1.67486	-0.0281653	-1.96925	-0.917871	0.256237	-1.47544	-2.06495	-1.1385	-2.0045	-2.1993	-1.17646	0.683948	-1.48462	0.162766	0.501622	-1.45493	-3.22432	1.67399	-1.21805	1.81894	1.64701	0.475622
CRYZL1	-0.893747	0.584668	0.895064	-0.481331	-0.199305	0.20953	-0.769717	0.00121331	-0.530984	-0.654814	-0.0590389	-0.215323	0.104252	-0.367754	-0.0247557	-0.0461476	0.367686	-0.178416	-0.712427	0.430943	-0.253869	-0.404332	-0.880784	-0.00121331	-0.757959	0.126131	-0.615981	-0.278916	-0.206145	0.117693	0.466575	-0.698797	0.183384	0.0795014	0.423693	0.449232	-0.385767	0.488511	0.173496	0.326995	0.0943005	1.48879	1.03491	1.45119	0.454192	1.0229
ZNF785	-0.573159	0.662372	0.406784	0.377454	0.847596	-0.938565	-0.0570202	0.275332	-0.305195	-0.635876	0.490446	-0.436176	-0.0115252	0.534598	0.363017	0.178424	-0.128845	0.0115252	0.46871	0.10154	0.638386	0.320539	-0.49155	0.715962	0.453531	-0.121876	-0.13669	0.777201	-0.387064	-0.336623	-0.537335	-0.0882139	-0.578519	-0.098865	-0.0122819	-0.360916	0.262268	-0.18969	-0.046648	-0.264242	-0.346885	0.169075	0.0409613	1.72927	0.814947	1.16602
WFIKKN2	-0.999661	-0.0125589	-0.756473	-0.614314	-0.564491	0.155828	0.0676756	0.101703	0.712979	-0.358569	0.0673204	-0.893681	-0.466947	0.462603	-0.707993	0.288589	0.237802	-0.582485	-0.349973	-0.0853939	-0.0531635	0.0125585	0.245477	0.70084	0.651807	-0.237388	-1.37184	-0.66423	-0.0632725	0.363128	0.789357	1.08971	-0.452013	2.51669	1.05881	0.830167	-0.306095	-0.0431066	0.411899	-0.268346	0.613834	0.797444	-0.562449	0.233346	0.449128	-0.364036
ZFP42	-0.27408	1.75559	0.673979	-0.212692	0.0751815	2.05366	0.507034	0.129661	1.13112	-0.0906849	-1.20767	-0.0470805	1.38335	2.71072	2.23357	-0.620748	0.155047	-0.898612	-0.860387	-0.0224891	3.32095	-0.353241	-0.738627	-0.546093	-0.346803	-0.388752	0.531046	2.04405	0.17299	-0.76508	2.34925	0.0224891	-0.740676	-0.69425	-0.381798	-0.633769	-0.66776	-0.293574	0.746569	0.792948	0.647304	2.10768	-0.176167	3.80717	-0.27563	2.87543
PHLDB2	0.374672	2.15342	1.31448	-1.10527	0.18239	-1.07917	0.803696	-0.799513	2.42793	-0.154463	-0.649627	2.06782	-1.09275	-2.01255	0.459879	-0.578182	-0.864231	2.07864	0.767529	-2.07589	0.987016	-1.44898	-0.70815	1.66654	1.93187	-1.43132	0.844621	1.13249	-0.499691	-1.49934	-0.74902	-0.701307	0.154463	1.70307	0.790008	0.340633	1.77411	-0.747638	-1.57885	-0.955523	-2.14999	1.69361	0.180451	-0.757678	1.82589	-0.42598
KLHL30-AS1	0.435821	0.883965	-0.335189	-0.913311	-1.40844	0.274371	-0.0209484	-0.288577	0.202747	-0.379562	0.720124	0.541375	0.290016	0.925663	1.3818	0.796451	-0.999657	0.487374	-0.155961	-0.132383	-0.486325	0.931896	0.845441	-0.496562	1.85729	0.600636	0.743289	1.04006	-0.771002	-1.12727	-1.32337	-0.975436	-1.06222	-1.36061	-2.79726	-0.909475	-1.54151	-1.30304	-1.00211	0.381357	1.04583	-0.0848293	0.212543	0.514319	0.0209486	0.314674
CASS4	-0.1269	0.58112	0.607164	-0.563956	0.614078	-0.198735	0.446486	-0.285897	2.81594	-1.12082	-1.46558	0.768358	-0.273387	1.3833	-0.0059948	-0.0676455	-0.0372186	1.55511	0.520669	0.254965	1.49036	0.545517	2.59164	-0.284844	1.61047	0.105966	1.27503	0.0911922	0.380285	-0.467805	-0.0266895	-0.976881	-0.534001	0.928012	-0.0261145	-1.93209	-0.296011	0.449527	-0.122969	0.370537	-0.143969	-1.58859	-2.48719	-3.31684	0.694956	0.0059948
STKLD1	-0.578136	1.17067	-1.1651	2.28144	-0.408099	-1.9331	1.13473	0.72603	0.197724	1.0377	1.85061	0.0140791	1.93415	-0.306307	0.10134	1.9722	1.41762	-0.98856	1.42586	-1.02537	1.36874	-0.0577483	-0.918635	-0.622846	-2.4268	-0.500353	1.31269	-0.475101	1.20763	-0.349789	-1.49807	1.88752	-0.966626	0.539243	-0.147997	0.830061	-0.0140791	-0.54839	-0.947415	-0.166543	1.54068	1.19538	2.61631	2.00361	-0.781189	-0.396283
UBE3C	0.719473	-0.233879	-0.649459	-0.590726	-0.334685	0.696302	0.205306	-0.0190115	-0.751278	-0.526393	-0.0957537	0.380049	-0.851028	-0.767936	0.367363	-0.161439	0.791917	-0.364496	-0.0989513	0.287098	-0.325644	-0.548176	0.233946	0.168762	-0.365674	0.0743179	-0.816395	0.147042	0.187815	0.942293	0.412921	0.270425	-0.1722	0.271294	0.104216	-0.216798	0.360556	0.306875	0.218297	1.01923	0.489239	-0.135699	-0.327576	-0.15097	0.0190115	-0.168033
SYT16	-3.19862	-1.91639	0.950755	-0.985703	-0.985526	0.585252	-0.0872755	1.02053	-0.731172	0.255461	-0.0415444	-1.34632	0.0415449	0.261197	0.78328	-3.40416	-4.15326	-3.00018	0.0979767	-0.353377	-0.0429049	-4.4729	0.634199	0.392384	0.615664	0.338951	0.388202	-1.61708	0.514639	-0.423924	-2.05013	0.703378	-0.844615	0.59558	-1.01705	0.751377	-0.640948	-0.67224	0.73654	1.17588	0.77098	0.177234	0.256039	0.928716	-0.157577	-1.29774
RAB39A	0.0564475	-0.442485	-0.32767	-0.615926	-0.511868	-0.229798	0.345806	-0.129439	-0.0112185	-0.498957	-1.78232	-0.594118	0.0969496	-1.03181	0.322697	-0.527368	0.139386	-0.493102	0.104735	0.698703	0.964528	-0.726407	-0.0995364	-0.0427008	-0.0542884	0.507597	0.03824	0.235673	0.198581	-0.0808606	0.568123	0.0112185	-0.459019	-0.270818	0.659875	-0.813209	0.406465	0.0862904	0.208114	-0.377902	0.641782	0.658349	0.509778	0.0390477	0.54543	-1.28441
FNDC9	-0.547011	-0.894486	-0.197633	-0.326031	-2.89682	-3.07871	-0.713218	0.460445	0.990857	-3.49797	-0.471545	-0.271762	-1.74576	-1.75778	1.06311	0.274601	0.485919	0.233881	-4.42977	0.81991	0.544157	0.27056	0.8647	0.444315	-0.26326	0.00953531	-0.315852	-0.379842	1.1912	-0.00953531	0.48103	0.422869	-0.924313	-1.4383	-1.81412	-0.109324	0.615102	-0.770581	-1.5021	0.398047	0.576223	0.688404	0.0744667	0.721971	0.889098	0.527659
TRIM72	-0.290028	-0.671616	0.115991	-1.77791	0.338124	-0.808288	-0.00230169	0.530337	1.32257	0.318234	0.0505886	-0.227795	0.541405	0.427053	0.00230169	-0.798407	-0.725834	-2.35669	-1.04617	1.1964	0.495511	-0.679217	-0.358454	0.0575156	-1.73075	-0.14564	0.341054	0.54154	0.120082	3.04331	-0.920609	-0.423783	-0.24843	-2.11021	0.421331	-0.413368	-1.58947	0.109525	0.0315495	1.59168	-0.72806	-3.40691	0.135282	0.597012	0.569893	-0.368353
CLDN19	-0.118742	0.459214	0.165561	-0.142695	-1.54588	-0.868035	-0.788255	-0.240832	1.01618	-0.103468	0.0040741	0.254355	0.733371	0.677754	0.6217	0.0147562	-0.130641	-0.148415	0.428859	-0.0680032	-0.754655	0.362803	0.424131	0.62771	0.415506	-2.68416	-0.0244927	-0.00710392	-0.27851	-2.39315	0.734644	0.257825	0.357575	-0.338527	-0.511778	-0.159565	0.0498118	-1.00358	-0.0040741	0.30115	-0.276289	0.295855	0.823538	0.612105	-0.689072	0.480762
FBXO8	-0.0452857	0.291848	0.876862	0.279964	-0.273266	0.229805	-0.0380473	-0.316891	0.146739	-0.129704	-0.106359	-0.31521	0.413297	0.132975	-0.339359	-0.347173	-0.589375	-0.592109	-0.516575	-0.216945	-0.58322	-0.271982	-0.558976	0.175855	-0.0841279	-0.200758	0.457712	-0.454161	0.45487	0.224169	0.526446	0.386271	-0.00287962	0.610357	0.272456	0.602851	-0.248961	-0.171261	0.00287962	0.352498	0.00548124	0.286568	-0.00778341	0.141209	0.228457	0.593416
LOC389199	-0.208562	1.28752	0.465456	0.140195	0.407725	-0.823655	0.871757	1.07052	1.44181	0.728071	0.328288	-0.711983	0.318523	-0.179928	0.646111	-0.465968	-0.753771	0.204372	-0.0805111	0.77273	0.677493	-0.537348	0.208467	0.710489	-0.495317	-0.787029	-0.50103	-0.114944	0.326036	-1.05659	-0.482329	0.150104	-0.174638	-0.127585	0.147927	-0.808469	0.0702257	-0.42831	-0.790146	-0.492439	-0.472651	1.15854	0.859088	-0.0702257	0.24371	-0.33304
CLDN20	-0.298913	0.35278	0.971352	0.37049	0.0168972	0.255598	-2.33068	-0.0988712	0.487922	-1.53231	-2.30266	0.397481	0.00244618	-0.201324	0.499428	-0.516206	0.0348606	0.549386	-0.489487	-0.130336	0.0605106	0.819586	0.0131855	-0.25339	0.93957	0.460124	-0.155056	-0.00244618	-0.00639582	-0.803623	-2.04641	0.0602994	-0.380153	0.193364	0.669325	-1.9892	-0.857457	-0.330037	-1.16072	0.339373	-0.0684753	-0.148601	0.703148	1.58077	0.898875	-0.0605094
UBE2O	2.39805	0.297404	-0.106923	0.55625	0.577305	-0.589615	1.61111	1.03435	-0.286634	2.06536	-0.197362	0.102131	-0.0088892	-0.673629	-0.23818	0.0683565	-0.0938396	2.09721	-0.271773	0.608061	2.89019	-0.0448356	-0.347471	0.280845	0.759322	-0.723413	0.120331	-0.57038	3.36975	-0.980684	2.3674	-0.555103	-0.910063	-0.239403	0.0722351	0.0088892	0.402058	-0.680948	1.65613	-0.717161	0.702421	-0.472257	-0.153657	-0.746595	-0.203246	0.377619
DZANK1	-1.18673	0.345695	1.68303	0.903201	-0.335949	1.47447	1.60613	-0.153981	1.26656	1.50162	1.02421	0.90984	-0.786185	-1.16188	1.72435	-1.03777	-1.46795	-1.93044	-0.934224	-0.601314	-0.0395117	0.319678	-0.560513	-0.693832	-0.831891	-0.987865	-0.402529	0.412155	1.43407	0.0417414	1.11977	0.113254	-1.16848	0.733876	1.74957	0.706369	0.290949	-0.711222	-0.846693	1.7294	-1.59761	-0.361654	0.81694	0.00935984	-0.00935984	-1.21112
CDK15	0.159096	-0.305438	0.390646	-0.940623	-0.275197	-0.966417	0.45045	-0.0880151	-0.54115	0.773253	-1.43693	-0.991115	-0.63695	2.10532	1.84295	0.118397	1.81755	-0.338094	-0.00563002	2.93259	-0.385961	-0.684351	0.151051	-0.159192	0.342153	0.312447	0.0263276	1.24804	0.00563002	-0.733223	0.154164	1.11767	-0.13152	-1.38071	2.75156	-0.655548	-0.151284	-0.873726	-0.532063	2.52979	0.421617	2.2497	-0.555692	0.923583	-0.855625	2.45653
ADCY7	-0.96907	-0.24734	0.239407	-0.229798	1.61155	-0.693115	-0.0599241	0.289799	2.69698	-1.11977	-0.497319	-0.3893	-1.37641	-0.1739	0.179576	0.665195	0.460461	-0.691568	0.0599241	-0.644533	0.117386	-0.650951	0.0791259	0.438002	-0.177916	-1.22942	0.173986	-0.363371	-0.758849	1.74928	0.0604181	-0.819008	2.01171	-0.370544	0.375265	0.217456	2.60565	-0.849925	-0.0608478	0.871396	0.386048	0.221594	1.54042	-0.498162	-1.30129	0.215759
PDGFRA	1.06608	-1.73667	1.74088	0.892646	1.45942	-2.32462	-1.72899	0.0656686	3.16878	1.40294	-2.28834	-1.66471	1.4419	1.71422	-0.255259	-0.459434	-0.421726	-1.25375	-0.183584	2.29851	1.4587	0.36097	2.4379	1.95231	0.029902	-1.0297	-0.521566	1.92563	-0.753035	-1.08278	2.06634	-1.90119	-1.55171	-0.326131	-1.1739	-0.0299015	-0.0850787	-1.59371	1.38352	-3.02313	1.91654	1.63717	0.533151	0.738702	1.73598	-1.01722
RASSF5	-1.04629	-0.386714	0.515592	0.259984	0.747435	-0.222351	0.00533867	-0.241238	1.14086	-0.091208	-0.929187	0.282965	-0.0265226	-0.00325346	-0.62076	0.0969839	-1.13619	0.523454	0.368429	-0.0667534	1.75694	1.27223	1.20172	-0.616148	0.314131	0.718666	1.06773	0.0680499	-1.12926	-0.204384	0.478835	-3.71733	-0.0379367	1.21801	0.711474	0.648817	-0.577757	-0.381642	-0.251269	0.00325346	1.16226	-0.144006	-0.276625	-0.347003	0.542292	-0.856666
B3GNT5	-0.254066	0.0498157	0.539029	-0.58179	-0.953135	-0.203084	0.837279	-0.275106	0.750673	-0.0413003	-1.03614	0.00756884	-0.886508	0.139984	-0.623443	0.276619	-0.00756884	-0.205066	-0.159905	-0.28447	-0.350072	0.0760617	0.357591	0.0287175	-0.617452	-0.0646968	0.1353	-0.443598	-0.114615	0.252837	1.45325	0.638218	0.346465	0.791434	0.345843	1.17157	0.114703	0.748515	0.225365	0.879761	0.940316	-0.441326	-1.19684	-0.982758	-0.559326	-0.28402
USP36	1.96643	-0.887584	-0.219808	-1.04743	1.94367	-0.266567	0.0309896	0.247046	-0.289968	-0.24178	0.0238829	-0.719437	0.675926	-1.346	-0.413969	0.334014	-0.0399294	-0.90653	-0.250987	0.838749	-1.38246	-0.0238833	0.120146	0.207908	0.838434	1.44835	-1.62464	-1.36105	2.60365	-1.15559	0.0653429	-0.579345	-0.565444	1.57325	1.66758	-0.0400887	0.856078	1.6646	-0.925152	-0.219081	2.55161	1.92846	1.25322	1.44449	0.473245	-0.211615
CIDECP1	-0.0183392	-0.961146	-0.470113	0.471294	-0.521997	-0.453188	0.508363	0.00407887	0.235306	-0.0545707	-0.566543	-0.39738	-0.0732646	0.204734	-0.0953631	0.672569	0.164522	-0.455125	-0.619445	0.264121	0.649146	-0.00407887	0.314565	-0.0421338	0.18532	0.141119	-0.0318952	-0.378657	-0.598568	0.190306	0.586733	-0.328934	0.476735	0.219549	0.335219	-0.153792	-0.352343	0.529269	-0.0322227	0.46717	1.02848	0.636366	-0.468077	-0.020072	0.0546846	0.267868
ATP6V1B1	0.940217	0.102412	3.40354	0.582871	0.102666	-0.951571	-1.47207	0.530162	2.11659	-0.979068	2.49186	-0.500397	-0.109672	1.78686	-0.687617	3.24492	-0.810942	2.68719	-0.841495	-0.937417	2.90417	0.00225735	-1.01424	-0.992181	-0.814452	1.98071	0.883776	-0.00808907	-0.573707	-1.14224	1.92559	0.264219	-0.640637	2.75887	-1.14193	1.25879	2.04874	-0.161963	-0.00225735	1.01085	-0.800597	-0.453354	-0.937634	0.0575461	-0.0856023	2.33933
TOR1A	-0.370475	2.57202	-0.900559	-0.924917	-0.936295	0.313959	-0.832525	-0.107368	1.30864	1.12743	0.219549	-0.0020833	-0.830999	-0.291688	0.107614	-1.29183	0.00208282	-0.150547	-0.273038	-0.507505	-0.61725	-0.61601	1.749	-0.16153	0.996714	0.321811	1.7344	-0.631077	-0.410629	-0.452807	1.3771	2.08526	0.889366	-0.544291	0.157595	2.67347	-0.141262	0.144343	1.69676	-0.337051	2.25522	-0.843766	1.97982	0.0351772	2.37041	0.803619
KIAA1257	0.917654	0.906184	-0.695829	-0.0652239	-0.753578	1.06228	-0.465476	-0.0519669	0.784149	0.251607	-0.920846	-1.25448	-0.0431144	0.0349052	0.77828	1.22691	1.60283	-1.20016	-0.085036	-1.31445	0.202759	0.0703986	1.1433	1.08155	-0.160662	1.59756	-0.642181	0.608971	-0.22192	0.732491	-0.263481	-0.57283	-0.711435	-0.0349052	-0.537394	-0.40141	0.438624	0.293731	-0.413625	0.307676	-0.551945	-0.196983	0.529734	1.11676	1.27227	0.473874
CMAHP	-0.342529	-0.49443	-0.996559	-0.56418	-2.22775	2.38196	-1.38711	-1.69596	2.05009	1.49741	0.149303	1.38221	0.0382419	0.0226679	-0.0226674	0.0532908	0.334249	1.87523	-1.20051	-0.575718	-0.706153	-0.771714	2.4957	1.54788	-0.114011	-1.791	-1.41779	-0.177371	0.727796	2.22819	-0.0920443	2.49365	2.37123	-0.0285149	-0.63124	0.524244	2.02655	-0.587381	2.44171	0.490361	0.154193	0.0917821	-0.738482	-0.267966	0.750671	-0.17247
PCNP	-0.355576	0.572465	0.367848	-0.214969	-0.312436	-0.00488401	0.431576	0.133292	-0.300424	0.241614	-0.125767	0.172232	-0.28174	-0.0516608	-0.14805	-0.0849545	0.365616	-0.311498	0.356309	-0.195273	-0.0807211	-0.265489	-0.0402205	-0.781376	0.0169895	0.0439575	-0.514083	-0.106697	-0.143543	0.174455	0.228715	0.230452	0.198241	0.022495	0.375028	-0.0634682	0.427721	0.0643098	0.416083	0.386704	-0.0419676	0.183284	-0.272454	0.00488401	-0.237867	0.072098
HMGCLL1	1.0567	-0.00644636	-0.860249	-0.0594826	-1.06644	-0.239454	0.757041	0.479407	1.14958	1.57512	0.545976	-0.851456	1.97605	-0.360343	-1.02825	-1.59104	0.284605	-0.158322	-0.674089	0.265096	0.64331	0.634453	-0.681546	0.366291	-0.120234	1.23262	-1.04032	-0.423476	-0.464371	0.288502	-0.0897379	0.882286	-0.767837	1.65617	1.89649	1.85525	-1.95825	-1.50884	-0.342175	0.00644684	1.60817	-1.35721	0.0100574	-0.125376	1.8605	0.420437
S100Z	1.18363	-1.05755	0.3776	0.955241	-0.24233	1.37179	-1.98379	0.190637	1.99284	-1.68089	0.331135	-0.52745	0.851319	-1.75274	1.41668	-1.70113	-1.78916	0.343689	-0.0268087	1.00436	-1.72851	-0.360569	0.785819	1.11367	-1.76383	0.344579	-1.09406	1.0509	0.811985	-2.68267	0.0268087	-2.68972	0.558432	-2.53298	-1.92302	0.0627871	-0.120832	-2.10566	0.0698009	-0.658292	-2.67253	0.602024	-1.25999	1.54871	-1.77951	0.88039
PRIM2	-0.390609	-0.766566	0.144143	-0.465411	-1.04583	2.5765	2.37482	-1.34102	2.59295	-1.2505	1.06283	-0.802267	2.13407	0.468641	0.4574	-1.7077	0.327522	-1.72834	-1.24181	0.557594	1.60185	-0.711888	-0.739761	1.69516	1.41398	-1.36068	0.165452	1.91339	-1.13764	-0.547816	-0.471432	2.21941	-0.462857	-0.144143	3.15599	-0.235182	-1.35122	-0.838878	-0.989301	-0.716502	0.623298	1.05016	0.362236	0.701523	0.456248	0.694043
EMSLR	0.422541	1.06759	0.0105217	-1.3303	0.257285	0.471211	1.04001	-1.1603	-0.18829	1.873	0.96697	0.346239	-0.58429	-0.625771	0.51202	0.148301	0.739701	-2.15757	0.253927	0.394439	-1.39544	0.0992362	-0.132768	-0.820646	-0.506458	0.654532	-4.4723	0.283253	-0.399254	-0.0245626	-1.39843	-1.14432	-0.0105217	-0.235147	-1.59447	-0.120074	-0.0791123	-0.425285	1.88352	1.07228	-0.590119	1.36856	0.954638	0.0735519	-3.43895	0.174505
LINC01580	-0.103691	0.960195	-0.34916	2.15894	1.85728	-0.672358	1.37702	-0.15762	-0.526554	-0.724957	-0.192541	0.655243	-0.424487	0.0224652	0.32467	0.0012598	0.670133	-1.25594	-0.484263	1.90536	-0.497886	-0.499509	-0.593123	-0.710713	0.130184	-0.20418	0.829135	-1.88415	-0.0012598	1.61618	1.13722	-1.41825	2.47334	0.658354	0.594975	-0.165069	-0.704042	0.579302	0.754406	2.37878	-0.687404	-0.457787	0.586529	0.953084	-0.362772	3.82976
HYDIN	0.431909	-0.760061	-0.0764389	-1.29527	-0.143187	2.12859	0.548812	0.83967	3.01991	-0.437843	0.869131	-1.21421	0.666429	0.87806	-1.06989	2.59778	-0.82277	-0.995334	-1.7915	-1.15206	-0.0318174	-0.239915	0.0563245	1.71291	1.17897	0.364911	-0.161968	1.81224	-0.276656	1.42322	0.473758	-1.4967	0.121961	-1.35507	-0.827667	0.77237	1.60803	-1.73002	-1.7681	-0.166598	0.382842	-0.143581	0.031817	0.158559	-0.144069	0.151079
ESYT3	-0.252888	4.52078	-0.756	-0.858953	0.22998	-1.23371	-1.12073	-1.89895	1.99309	-0.0554519	2.01199	2.78554	-0.508358	-0.0947056	-0.820984	2.19583	1.73229	0.824748	1.44925	2.37927	-0.8529	-0.713829	2.36341	-0.906444	2.74716	-1.69282	-0.551658	-0.530558	0.932166	-0.684243	-1.30311	0.159655	0.164981	-0.687233	-1.7864	-1.33716	-1.1455	-1.97225	3.76187	0.549442	0.713296	0.0554519	2.41941	0.835466	4.50309	0.793693
PLA2G4D	-0.435331	-2.39086	0.192723	-0.00275707	0.573409	0.00275707	0.0752907	0.662035	0.873903	-1.07882	-0.528489	0.0366616	0.374529	0.573074	0.998791	0.190082	0.083529	-1.69279	-1.29722	-0.298532	-1.00146	-3.16997	-0.155394	0.309442	-0.142941	0.271383	-0.209624	-0.343235	-0.641366	-1.8928	0.597078	-1.35313	0.0438566	0.828305	0.353147	0.524655	0.35159	-0.322145	0.0712948	-0.417086	0.134307	-0.485327	-2.8027	0.526425	-2.78186	-0.805338
CFAP69	-0.472281	0.372066	0.210061	-0.352976	-0.867907	-1.00909	-1.24858	0.573979	-0.435229	-2.10911	0.426654	-0.290247	-0.166026	0.313596	0.629166	1.0267	-1.49751	0.906341	-0.285306	-0.601815	-0.306536	1.57876	0.926488	-0.155133	0.517619	0.00346351	0.358318	-0.801056	-0.252126	-0.645903	0.712015	0.795236	0.745264	-0.461101	0.316715	0.263573	0.250166	-0.52702	-0.888452	1.45359	0.526071	-0.00346351	0.46895	-1.08979	-0.161416	0.119961
SCEL	-0.0649002	0.225176	-0.0784862	0.512593	-0.359874	-2.2132	-0.701628	0.246788	1.92163	-0.695299	-0.780356	-3.79094	-2.1765	1.11451	0.446877	0.387885	1.85222	0.660168	-0.397655	-0.122744	-0.450713	-0.474242	-3.02216	0.826244	0.127961	-0.583747	-1.33497	-1.13365	-2.15649	2.19591	1.17993	1.42278	0.218846	0.404418	1.72067	0.0649002	1.77381	-0.154248	-0.341759	0.814938	0.380239	-2.85014	0.241638	-1.93305	-0.222375	0.929702
FUT8	0.208366	-0.288393	-0.810721	-0.08605	-0.51518	0.00956821	0.624243	-0.196469	-0.411673	-0.260193	-0.792105	0.204878	0.300515	0.280675	-0.325962	1.20059	-0.359312	-0.482337	-0.38782	-0.302491	0.0609159	0.489579	0.223462	-0.00956821	0.0193672	0.34346	-0.337188	-0.356274	-0.279721	0.706602	0.28025	-0.0521803	-0.294236	0.260538	1.22916	0.475663	-0.752809	0.0442438	-0.182268	1.49455	0.67126	-0.412009	-0.542687	0.576671	0.316442	1.2038
ZSWIM2	0.695427	-0.136566	0.550877	3.03653	-0.680349	-0.560079	-1.06037	0.358093	0.611704	0.548932	-0.71976	-0.257876	1.09877	0.676814	1.18028	-0.302822	1.24063	-0.366243	0.785521	-1.43203	-0.899962	0.993598	-1.2873	0.862048	-0.355438	-1.59573	-0.22825	-0.137461	-0.243644	-0.312961	-0.735049	-0.00544023	-1.36618	-1.11813	-0.100976	-0.224956	0.44811	3.59094	0.302486	1.4767	0.00544071	0.366832	0.874036	1.9532	0.98283	3.13062
ACOT11	0.871186	-0.695573	-2.50179	0.311874	-0.921953	0.443989	0.675257	0.928971	-0.343844	-0.0616686	0.257411	-0.626469	0.507012	-0.150421	-0.28649	-0.845287	0.679514	-0.315123	-0.844228	-1.65643	-0.270578	-0.911652	-0.406891	0.811514	-0.505102	-0.575329	-0.384818	-0.455334	0.430319	0.489543	0.242672	0.207906	0.120836	-0.105192	0.072891	1.09112	-0.735878	0.617864	0.565169	-0.625955	0.716842	0.195455	0.681515	0.480506	-0.88332	0.0616686
FAM230I	-0.73466	1.53487	0.181334	-0.14582	1.76403	-0.784036	-0.864869	-1.43649	1.61824	2.10172	1.68556	-1.23186	-0.0328903	-0.794536	0.601846	-1.14171	0.291503	0.105511	1.32519	-0.202486	1.90216	0.376274	-1.21689	-0.719887	1.69997	1.0557	1.38826	-0.0973988	1.73275	-0.169343	-0.364912	-0.020854	-0.420138	1.7948	1.85507	-0.400731	-0.191189	1.11091	0.020854	0.718949	-0.171275	-0.797743	-1.13217	1.32117	0.027554	-1.13898
KLHL14	2.28003	0.0361199	1.91201	2.14977	-2.15063	-1.47609	1.17573	-0.254098	-0.462876	-0.940438	-0.793631	-1.36863	-1.43657	-0.301878	1.22239	-1.47349	0.265458	-2.08983	2.13882	-1.73564	0.998404	-0.000754	-1.63019	1.50227	2.39134	-1.72298	-1.01329	-0.359688	-1.03511	-0.803689	2.91029	0.184463	2.58896	-0.958008	3.29134	-1.11574	-0.345006	1.96711	1.95319	0.102087	-2.12547	1.52172	0.000754	1.83692	0.0374126	0.332561
VIL1	-0.319077	0.610614	-0.944986	0.26818	0.845612	-0.0616505	0.0172527	-0.154502	0.16572	0.757976	0.734518	0.0479686	-0.319524	-0.141948	1.07349	-0.34302	0.404375	0.293301	1.38586	0.0894554	0.371215	-0.420551	0.365745	0.490047	0.787398	0.0580766	-0.803567	0.539498	-0.0355284	-0.262041	-0.246707	-0.402729	0.142935	-0.975966	-0.646338	-0.61031	-0.262653	-0.0394862	0.570899	-1.90106	-0.919338	0.776385	0.547836	-0.108726	-0.0172527	-0.238533
TSPEAR-AS2	-2.39725	1.07466	-1.28458	0.462635	-1.86915	-2.88687	-1.80779	-0.783569	1.61633	-0.766075	0.00407028	-0.240377	-1.57272	-0.635302	2.75422	1.32187	-0.606949	-0.591045	0.77422	-0.392456	-0.912295	0.689098	0.328241	-1.42631	-1.52619	0.11788	0.579805	0.687823	1.84509	2.32188	0.55326	-0.00407028	-0.370828	-2.40703	1.62295	-1.02908	1.25921	0.746695	1.79024	-2.03904	0.743387	1.82577	0.975744	2.16917	-2.09554	-0.998425
ZNF641	-0.0065639	-0.705303	-0.207142	0.387712	-0.0998089	0.0065639	0.291773	-0.713837	0.432267	1.11559	-0.201891	0.319278	0.556212	0.0539515	-0.149934	0.861054	-0.147942	-0.136054	-1.00892	-0.03144	-0.170679	0.255167	0.0358341	0.188044	-0.10787	-0.210157	0.511876	-0.292551	0.0641801	0.326399	-0.0380218	-0.25121	-0.111011	0.379494	0.280874	0.495168	0.709389	0.353187	-0.225897	0.178935	0.471877	-0.22887	-0.350709	-1.87813	-0.0656474	0.397358
CCDC190	-0.453311	-0.112496	1.7264	-0.870244	-0.304039	0.112497	0.476248	-0.840122	3.14569	-2.12244	0.763322	0.464328	1.1148	1.77026	1.30689	0.156347	-3.1186	-1.10457	0.323794	0.513581	-0.535168	-1.04521	0.169734	-1.72604	0.570591	-2.81041	-1.43053	1.19427	-2.95207	-0.787349	-3.66876	0.799242	-2.11917	-0.391417	0.35635	-2.98125	1.83438	-3.34854	0.384765	-0.747338	-1.88559	0.827354	1.58586	-0.576358	1.70764	1.73847
FGFR4	-0.277295	-0.991695	1.13533	2.75655	0.897296	1.16266	-0.149075	-1.63179	-0.965132	0.704852	1.50266	0.0887141	-1.12995	-0.0315924	1.77941	2.08426	0.178981	-1.62959	-0.164805	1.14317	-0.436161	-0.842307	-1.71354	1.37424	1.21155	-1.29904	0.144153	-1.95906	2.06062	1.72954	0.388505	2.09318	-1.08881	-0.599877	1.94258	-0.619295	-1.95565	0.0922995	-1.22325	-0.401617	0.96131	1.77933	-0.227362	-0.332674	-0.842766	0.0315928
PDILT	-0.72736	-0.437878	-0.268415	-0.169222	-1.49998	0.511545	-0.755036	0.0256348	0.885915	-0.736409	0.440841	1.20292	0.883597	0.619631	-0.161522	-0.627715	0.725701	-0.0702801	-0.318301	-0.00123978	-0.222665	0.0924244	0.302301	-0.565666	-0.36347	-0.719395	0.195488	0.0687714	-0.400832	-1.05322	0.107296	0.0012393	-1.11661	2.98614	0.0105524	-0.125098	1.25703	-1.35405	0.775651	-0.238693	1.85262	1.0376	-0.169343	2.32544	0.230626	0.998313
LINC00051	2.45409	-0.455704	2.70031	-1.08879	1.46799	-0.773711	-0.430229	-0.818817	-0.0483661	-1.47741	0.468526	1.06284	1.35953	-1.62452	3.10028	-1.21817	-0.882517	-0.465246	1.64697	-0.486152	-0.705375	-0.814133	1.90171	0.274453	-0.927973	1.19959	2.08201	1.34174	1.13905	-0.812994	-0.12115	0.107224	-1.74901	-0.606568	-1.48137	-0.864647	-1.56028	0.768826	0.23196	1.54385	0.705077	-1.92419	0.0483665	1.40609	0.0850253	1.87692
LKAAEAR1	-0.358951	0.355624	0.354137	0.201553	-0.230751	-0.0940206	0.869017	0.346216	0.509157	0.619467	-1.20804	-0.826237	-0.315941	0.863968	0.704995	0.368361	0.551188	-0.309103	-0.591242	0.402031	0.400411	-0.978782	-1.05327	0.684619	0.326603	0.179615	-0.282058	-2.03682	0.727107	-0.330564	-0.55743	-0.439075	-0.736732	-1.03045	-3.23002	0.0729425	-2.27499	-0.0729425	0.717216	0.554558	-2.05899	-0.899818	0.125664	0.519384	0.517482	-0.459425
EQTN	-1.88442	2.29338	3.0168	0.301732	-0.45523	0.238143	0.00354338	-1.21482	1.08725	-0.615491	-1.38567	-1.79591	0.592533	-0.935257	3.09238	0.671463	0.141301	1.95267	0.383234	2.42734	-0.542112	-1.07182	1.34178	0.264561	0.818331	-1.26069	-1.84242	-0.34008	-1.04361	2.34616	-2.07966	2.50278	-1.6312	0.235471	-1.38154	-0.837956	-1.13567	1.31076	-0.132667	-0.310593	-0.0668569	-0.608703	-0.0035429	0.335744	0.240169	0.328264
LINC00317	-0.155374	-1.37356	1.18122	-0.197769	-2.38428	-2.4511	0.00399613	-2.14779	0.5383	-0.778509	0.0492404	0.431906	0.148384	0.763999	-0.991921	-1.23101	-0.99925	0.0636418	0.0997899	0.61528	-1.48201	-0.707181	-1.73858	1.45819	0.266265	0.0195467	-0.211431	-0.00399613	0.0242274	-0.966526	1.13813	1.84075	0.0464613	-1.43464	-0.94308	0.65491	0.770371	-0.572644	-2.06589	-1.02015	0.694148	-2.3603	0.114123	0.608865	-0.803147	1.40337
HLA-DOB	-0.371629	0.530719	-0.334468	0.384177	0.305845	0.63605	0.647661	-1.79569	-0.0555615	-1.71738	-0.066772	-1.64206	-0.567512	-4.39383	0.975621	-1.79987	0.952041	0.347281	-2.49844	-0.395655	1.11731	0.667043	0.793636	0.970485	0.454848	-0.32006	-0.0225234	1.22072	0.80615	0.618115	0.502689	0.201765	-2.4727	-0.898026	0.0193233	-2.338	0.501323	-0.838172	-0.0193233	0.0713959	-0.506109	-0.430435	-1.63761	0.202168	0.407959	-0.136664
SNX19	-0.356826	-1.96132	-0.336451	0.11147	-0.435159	-0.402409	0.347574	0.43474	0.0967457	-0.558553	-0.543353	-0.318888	-1.02046	-0.314457	-0.5206	-0.0750835	0.330905	0.191481	0.147392	-0.433277	0.066963	-0.0590827	0.347084	0.826165	-0.0609715	-0.271823	-0.14547	0.247292	-0.35348	0.804673	0.919012	0.3662	0.0702398	0.912358	0.964426	1.21098	-0.228645	0.404363	0.170057	0.643292	1.39618	-0.948425	-0.247104	0.0590827	-0.18599	-0.32202
SLC9C2	1.08586	0.211936	-0.956367	-0.867965	0.0824494	1.89539	-1.85921	-2.30053	1.61068	1.65034	0.021039	-1.62122	-1.24182	1.52712	-0.783017	1.82028	0.79846	2.28699	-2.05638	-0.021039	2.96058	-1.09095	1.02674	-0.60427	-2.37063	-1.14455	-2.42051	-1.61923	-0.291876	-2.26699	-0.713527	-2.29213	-2.24765	-0.329882	0.432177	-2.35592	1.20262	-0.0724235	0.506244	2.43743	0.528935	2.642	0.520573	0.0509548	0.246109	0.0434742
PTGS2	-0.169486	0.950657	2.85725	-0.582539	2.14372	-2.58952	-1.82748	-0.2248	3.01962	-0.903363	-2.21535	1.00876	-0.773318	0.920847	-0.632204	1.05483	-0.727395	1.02121	1.56428	-1.5958	3.17941	3.07252	2.32881	-2.30693	1.44962	1.48936	0.0613389	1.69501	-1.0737	-0.875382	1.57803	-1.49346	-0.768428	0.157333	-1.20372	-0.0613389	1.76726	0.143391	0.549983	-2.53412	0.736794	-1.07155	-1.13727	-1.21435	0.549638	-1.81485
RASGEF1B	-2.28274	-0.0939264	-0.396771	-0.402746	0.877327	-0.413241	-2.26949	-0.849721	0.126144	-0.255457	-0.330037	2.45719	0.582681	1.39101	-0.0173812	2.11592	-0.986411	2.44391	-0.378092	-1.45545	1.85561	0.0173812	0.123739	-0.329444	2.7912	1.17766	0.374495	1.61758	0.143329	-2.13008	0.275628	0.968033	-0.510232	-0.856995	-1.33068	-0.873741	-0.612922	-0.479051	2.30805	-0.584687	1.61943	0.104573	1.88303	1.51725	0.165933	-0.07514
IQCF1	-0.771989	-0.0914953	1.55053	-1.33523	0.0392239	-0.904726	0.0140765	0.322157	1.33193	0.162209	-0.0575731	-0.385474	-1.05766	-0.137153	0.625954	0.168359	-0.139907	0.336135	-2.28124	0.523358	1.26227	0.00460792	-0.834355	-1.9688	0.298994	0.400475	0.779909	-2.06659	1.93182	0.208685	-1.23048	-1.47783	0.266727	0.00784707	-0.415239	-2.5522	-1.47993	-0.00460792	-0.292829	0.499372	-2.74426	0.595701	-0.293249	1.48378	1.11066	-0.10056
LOC403312	-3.30309	-1.78799	1.63121	-3.48659	0.215697	0.109708	0.100409	-0.688497	2.51478	-2.23344	0.618166	1.21449	0.527263	-1.49711	-2.15576	-2.14012	-1.25315	0.95992	-0.392479	0.626925	0.374273	-1.69372	-0.168169	-0.391974	0.867294	-3.39203	1.31835	-1.61909	-2.00886	0.69265	0.82777	0.31792	-0.100409	0.696424	0.446212	-3.12121	0.596141	0.673619	-0.534372	-0.909145	-0.770275	-3.39211	-1.4206	0.400744	0.668424	0.461702
RBL1	-0.0923324	1.14802	-0.810834	-0.987089	0.0350833	-0.318263	0.811853	0.354664	-0.743744	0.584174	0.560057	0.573515	-0.837713	-1.11261	-0.0229349	-0.681232	-0.472936	-0.542122	0.49893	-1.25348	0.403948	-0.762493	0.286632	-0.451498	-0.0922637	-0.16314	-1.10706	0.486721	0.585425	0.340534	-0.873585	0.0223389	-0.0223389	0.521531	1.03072	-0.645766	0.0411291	0.897859	0.936275	-0.914497	0.967854	0.831049	-1.23952	-0.493117	0.312029	0.310945
WDR66	3.1788	-0.16134	-1.17943	-0.714566	-0.161307	0.78519	-0.516936	0.4191	-0.859139	0.963976	1.92798	-0.548576	1.83476	-1.71987	0.514648	-0.97894	0.256015	-0.34576	-0.0774403	0.141069	-1.19116	-0.536929	2.02967	2.66882	0.307291	-0.238915	-1.09684	-0.296782	-1.36786	0.00777721	0.65567	0.111026	2.73223	-0.269341	-0.89646	3.7266	0.23646	-0.587198	0.129504	1.13802	0.425413	0.273346	0.270454	-0.574982	-0.00777721	-0.582463
IL16	0.121337	0.46644	-0.376982	0.25565	-0.387175	-0.72176	0.390629	0.647738	1.11564	-0.465888	0.0384929	-0.989546	0.796303	-0.192144	1.07309	-0.0776637	-0.600989	0.227036	0.143819	-0.0751169	-0.211532	0.501766	-0.974949	0.253438	-0.0769703	-0.638362	0.0210106	-0.80923	-0.0210106	-0.705626	-0.35164	-0.144117	-0.0599463	-0.0280073	0.175167	-0.241536	0.0269191	0.155333	0.281725	0.661078	0.48114	-0.190017	-0.216075	1.07227	0.473964	0.372779
OR2C3	0.393467	-1.67871	2.06445	-2.18787	0.545867	-0.335336	0.532239	1.42791	0.77813	-1.18082	-2.57534	0.34614	1.37923	1.3421	-0.101234	0.422698	-3.12361	-3.59708	0.353658	-1.62265	1.41288	-2.47562	-0.152857	1.12953	-1.82657	0.405067	0.428857	-3.05382	0.805058	1.78842	0.537771	-2.21553	-1.91526	-0.833025	-2.7337	-2.10537	0.101233	-0.77162	-2.42823	-0.138064	0.220742	-2.12331	1.22443	-1.16722	1.10331	1.11654
CDHR1	-1.07794	-0.614593	-0.236206	0.417456	-0.886012	0.72942	-0.890788	-0.0946033	-0.559935	0.473591	-1.89881	-6.03898	0.502493	-0.499418	1.98042	-1.72849	1.21102	0.331363	-1.87567	1.99996	-3.2066	-0.577657	0.94749	0.0946033	0.871983	0.737435	-0.971063	0.681204	-0.259668	-1.05242	-0.327523	2.12183	0.793588	-0.448111	1.98251	0.336278	-1.60023	1.06604	2.20778	1.13893	1.17694	1.16759	-1.32612	1.68109	-1.05036	-1.53945
ARHGAP20	0.167099	1.25953	-1.33786	0.856909	0.0187154	0.758548	-1.06389	0.763236	-1.44842	0.606957	0.375188	-1.64414	0.174503	-0.219333	-0.0695577	0.403804	-0.225193	-1.31241	1.07904	-0.0419474	-0.99043	-0.325006	1.02703	0.0389829	0.786688	1.09141	-0.867275	-0.686607	-0.988518	-0.0788326	0.41731	0.596208	0.097559	-1.59262	0.707078	-0.0609231	0.41302	-0.679861	-0.949239	-0.525714	0.653461	-0.0187154	0.889407	1.56509	-2.2421	-2.63769
TMEM26	0.728456	-0.552188	1.72364	0.872673	0.894639	0.620966	1.28354	-3.17018	-1.02597	-2.18411	-2.95968	-3.77933	-1.67425	0.878165	-1.3357	-0.468908	1.01584	0.0290284	1.00078	-1.85685	0.303903	-2.34923	-1.679	0.0940766	-2.46974	0.959546	1.15541	-3.34307	0.825006	-1.14483	0.504759	-1.23728	0.248391	-2.89038	1.72875	-0.150091	-2.74938	-2.27694	-2.98789	0.0356107	-1.6041	-0.0290284	1.3746	1.06165	0.798173	1.42549
RGS12	-0.323739	0.24783	-0.226312	1.59089	-1.55237	-0.305726	-1.19064	-1.47791	-0.336367	0.0412493	-0.857503	-0.456253	1.12987	2.14432	-0.739623	-0.471074	-0.216734	0.731856	2.17108	2.27541	-2.22613	-1.12416	0.972029	1.53321	0.122005	-2.20374	-0.690249	1.07269	-0.882634	1.5241	-0.262353	1.98506	1.62011	1.20059	1.6597	0.812647	-2.38756	1.87038	2.15211	-1.02235	1.51813	-0.0412493	-0.357838	1.49002	2.17463	-0.207702
IDH1	0.596741	0.873797	-0.0785637	-0.0497723	-0.694033	0.346743	0.692295	-0.0314579	-0.226176	-0.0368843	-0.321821	-0.848438	0.109119	-0.173288	-0.235378	0.489748	0.904026	-0.991609	-0.176469	0.527512	-0.806087	-0.252593	-0.610047	0.839647	-0.362829	0.0571403	0.0314579	-0.336699	-0.216414	-0.0860395	0.364059	0.648183	0.429955	0.385694	0.0552559	0.632221	0.557845	-0.169592	0.931833	-0.220322	-0.268826	0.374758	0.386645	-0.374975	0.362171	0.0557294
EPB41L4A	-0.722791	0.724517	1.16562	0.403195	-0.854547	-1.64901	-1.00813	-0.82323	1.21681	-2.03742	-1.56064	-0.50302	2.88142	-0.173813	0.871729	2.82289	2.07454	0.876045	-0.145642	-0.82832	-1.29176	0.357805	0.729653	-2.10312	-0.151543	0.0995002	-0.440285	2.73086	-0.405978	-0.882014	2.3007	2.95964	-0.69511	-1.26916	1.86634	-1.5819	-1.54794	-0.0995002	-0.342997	0.929115	0.225318	0.798282	0.599877	1.49335	0.833541	0.152466
ABCC4	-0.640756	0.0946722	-0.370647	-0.60296	0.0602789	0.0178862	-0.502475	0.997529	-0.268342	0.326612	0.470929	-0.0178862	-0.639983	-0.0517144	-0.582144	-0.361799	0.171329	-0.542175	0.20856	-0.0404453	0.496532	-0.187259	-0.195105	-1.64535	0.0438147	0.0297728	-0.499206	0.524946	-0.951322	0.476022	0.75194	0.18747	-0.122082	0.813975	0.527176	1.08116	-0.0454612	0.258438	0.555832	-0.0323229	0.563532	0.153582	-0.590938	-0.468461	-0.489951	0.559329
LINC00612	-1.92032	-1.72811	-1.58099	0.166531	-1.07713	-2.76435	-2.85863	0.779346	2.7248	-0.0237412	0.423625	-0.76426	0.46123	0.0237412	1.37494	1.00135	-0.637537	1.47087	-0.852015	1.90824	1.51546	0.470444	1.48409	0.821156	-1.3711	0.358549	-1.93005	0.768602	-0.464011	0.856154	1.30644	-1.47145	-1.07032	-0.156433	1.79407	-2.03369	0.45411	0.675224	-1.27824	-1.14882	-0.535704	-1.43704	1.82669	1.92	-1.63763	-0.501532
NAGA	0.341326	-1.18018	0.164162	0.274939	-0.556241	-0.0529482	-0.135496	-0.0875123	-0.123717	0.225235	-0.233304	-0.125737	0.259858	0.040858	-0.547745	-0.120991	0.122635	0.097965	0.0329101	-0.0645926	-0.70277	0.262747	-0.442285	-0.0555336	-0.120398	0.228519	0.400238	0.0210378	0.298657	0.245587	0.156799	0.21378	-0.407729	0.302214	0.457139	0.592111	-0.275461	-0.24865	0.252226	0.32138	0.570836	-0.467719	-0.0210378	-0.128189	-0.441064	-0.126408
LHFPL5	-0.521521	-1.12446	1.85647	0.957041	1.33258	1.29786	-0.436035	1.31861	1.47777	-2.35258	-1.84448	-2.76521	1.14178	-0.0213242	1.96425	-0.0254517	-0.0284371	1.4196	0.476108	0.666608	2.40926	-0.503834	-0.350912	0.0213242	0.979968	-0.518847	-0.470352	-0.064074	0.115866	0.77581	-2.15639	1.95893	-0.456933	-0.425308	1.00701	2.41304	-0.453387	-2.24011	-0.387273	1.0823	0.881214	0.50284	-0.554503	-1.66436	1.41504	-1.67184
KLHL40	-0.780712	-0.319604	-0.441929	-0.573534	-0.752959	-0.82806	-0.38244	-0.767372	1.82564	0.468992	0.399131	-1.05098	0.653492	0.597618	0.00163794	-0.591808	-0.417051	0.664646	-0.83842	-0.159128	-0.00651598	-0.718217	-0.196057	-0.0207806	-0.0824575	0.2257	-0.576296	-1.0711	0.966223	0.608592	2.31964	0.694011	-0.621032	0.630619	1.23266	1.3337	2.18818	3.06963	1.96391	1.50505	-0.00163794	-0.359327	1.23017	2.5537	1.69726	0.339286
TSPEAR	-1.90988	1.02195	2.12753	-0.859653	1.49507	-0.10669	2.92222	1.4969	-1.77606	-0.574716	-2.1466	-1.69791	-0.303274	-1.67036	3.14856	0.28681	0.563087	-0.753883	0.409586	2.0616	0.693046	-0.315547	-0.30439	-0.0213556	1.0035	-0.17555	0.70016	-1.51332	-1.02925	3.30951	2.73576	-0.529959	0.0213556	2.39167	3.3493	-1.04758	0.180882	2.45266	0.33877	-0.236141	1.59456	2.1932	-0.758254	-0.732535	-1.06227	-0.767124
TLL1	-2.77644	0.219971	0.258979	0.154069	1.4856	-1.59428	0.920109	-0.629555	1.53203	-2.71854	0.0270095	-1.15724	0.418293	-1.2629	0.674879	-3.34775	0.201432	-0.907989	-0.197721	-0.399814	0.0039506	0.186903	-0.468315	1.20432	-2.24795	-0.643874	0.0444946	-0.0384774	1.2066	0.270958	0.387585	0.704159	-0.296372	-0.52744	0.98234	-0.908472	-1.66703	-0.249093	0.354411	0.250623	0.471413	0.296288	-0.0039506	-1.78963	-1.51192	-1.87979
RPL13AP17	-0.400553	-0.782146	-0.944848	-0.84311	1.24689	-0.97349	-0.651286	-1.10258	1.11218	0.485046	-0.36606	0.62062	0.63197	0.710047	0.647311	0.835334	-0.201723	0.851706	-1.47905	-0.662226	-0.135315	0.608436	0.403855	0.936713	-0.739959	-0.316122	0.135315	0.413234	1.34573	-0.481784	1.30515	0.897309	0.751066	-0.764286	0.162973	-1.37002	0.936525	-1.83952	0.968214	1.2525	-1.01182	-0.765995	-0.243823	-0.782345	0.740836	-1.42145
LINC01657	-4.30194	0.99097	1.01162	-2.67839	1.07908	-2.43187	0.900092	1.01012	0.296343	-0.390766	-0.0336237	-2.59278	0.0336242	-0.180633	1.36707	-0.275949	-0.58989	0.285663	0.496422	1.15231	-0.37597	-1.64514	1.01682	-1.31797	0.486914	-1.2525	-2.7455	-0.233015	0.924119	-0.332578	0.0937118	-4.48683	0.603341	-0.38339	-2.41545	-0.0914965	0.0688701	1.20115	0.981457	1.50188	1.10939	-1.6112	0.284665	-1.69536	-1.12625	0.067028
TMEM182	-0.4994	0.0470409	-0.0284538	-0.189414	-0.728608	0.278364	-0.00624609	0.53808	0.474287	0.345841	-0.0537224	-0.729015	0.377458	-0.255141	-1.09324	0.833743	0.590498	-0.756299	0.363347	-0.0738568	-0.137894	-2.32352	0.183221	-0.00929832	0.216088	-0.0324111	-0.168255	0.00624609	0.036551	-0.321692	0.171875	0.920384	-0.770965	-0.257113	-0.833535	0.717535	0.103075	0.374763	0.381027	1.13976	-0.0452485	-0.657432	0.849977	0.866578	-0.276612	0.29095
VASH2	-0.135526	0.258167	-3.77715	-0.644735	-0.00182414	0.00182414	0.855459	-0.061878	0.493354	0.210886	-0.380791	-0.137056	-0.179292	0.268338	0.712741	-0.0300004	-0.108313	-0.437491	0.245003	-0.237348	1.17731	0.389123	0.445288	0.848964	0.09215	-0.188091	-0.715245	-0.055928	-1.05036	-0.299418	0.458631	-0.425534	-0.214743	-0.119525	0.0300572	0.0122979	0.100712	-0.150456	0.130076	0.319488	-0.597917	0.327831	0.145572	0.778994	0.236822	-1.04066
STPG2	-0.934853	-0.206411	-0.946186	1.04817	-0.27305	0.347777	-3.61838	-1.39457	1.20933	0.264024	-1.06213	0.633305	-0.819949	0.742379	-1.50755	0.825782	-2.63036	-1.99134	-0.146119	0.307568	-0.201333	0.63235	1.183	-1.18379	0.59351	-2.56995	-1.55781	0.519292	0.576065	-1.7211	1.03387	0.894319	-0.295352	0.45906	0.177698	-0.689826	-0.718625	-0.238184	-0.114635	0.761316	0.114635	-2.23009	0.642603	0.22631	0.601686	1.05662
MPP4	-2.65691	-0.048934	1.64629	-0.0969248	-0.404821	-3.03063	0.717299	1.10191	1.38457	1.18871	0.0463452	-1.67684	-0.238942	-0.828332	-0.307307	-2.80188	-1.38568	-3.86028	-0.973463	-0.0158734	-3.42564	0.15536	-1.01188	0.481644	-0.298044	-0.145373	0.646551	0.731902	0.737576	0.240513	0.96477	0.228362	-1.45025	0.0158734	0.955097	1.07426	-2.38032	0.19278	1.1745	-1.4049	0.863746	1.26101	0.900011	1.3275	-0.555232	-1.53087
FGF7	-0.992327	-0.846031	2.22874	2.81644	1.98544	-0.22717	-1.79883	2.19271	0.749767	-1.86527	1.95782	-1.90231	2.99936	-0.401464	-1.20779	2.74593	-1.39429	2.40124	1.03782	0.6037	-2.03862	3.00868	2.10873	-1.89106	0.957972	-0.524648	2.05386	1.91861	-1.52957	-1.30552	-1.93234	-0.141998	0.978117	-1.91787	-1.70135	-1.92559	-1.90445	-1.91061	-1.74953	2.24918	-0.69963	3.07976	0.141998	0.481286	0.178657	2.43718
KLHL3	-2.34069	-1.71858	0.407491	2.27812	0.422801	0.558315	2.02529	0.027	0.0538607	1.40279	-3.45849	-0.0872035	0.205729	-0.235012	-0.511998	-0.467747	1.08788	-0.180674	1.10068	-1.1008	-1.44107	0.664901	-2.5811	1.33538	0.525845	1.17643	0.889743	1.54214	2.45167	-0.621071	1.73301	-0.0270004	-1.46909	-1.58098	2.14474	1.00196	-1.13791	-2.35601	-0.637466	-1.82098	-1.70328	-1.85339	1.92421	-0.181961	-0.384318	0.703274
CCDC181	-0.513071	1.12192	-0.493967	3.76014	-0.550132	-0.525139	-0.410033	0.0502968	4.10173	2.99158	-0.532816	-0.542906	-0.287429	-0.538883	-0.231438	-0.539142	-0.364604	-0.559783	-0.211559	-0.503287	-0.649818	-0.543101	-0.632531	0.120949	0.720817	0.458735	2.13505	0.36728	-0.00079	2.67598	-0.545319	4.46184	3.65138	0.261715	3.17272	-0.536794	0.67665	1.73384	-0.477564	0.120514	-0.372626	0.00079	1.54432	3.52554	1.56746	1.8626
SLC11A1	-1.61633	0.632054	-1.26902	0.271775	0.294966	-1.01077	0.751965	-0.843135	3.53443	-0.355231	2.25122	2.6785	0.314181	0.418361	2.69444	-0.470141	-0.201465	2.44886	-0.0628181	-0.894202	1.52707	1.79351	3.37382	-1.84897	-1.34792	0.0628181	0.794689	0.333248	-1.24378	1.38455	2.48509	-0.569357	1.89798	-2.0521	0.717257	-2.74327	-1.11754	0.760056	-0.15651	-1.60904	-0.110237	-0.69105	-0.243777	-0.412693	-0.715322	1.12481
LINC01126	0.546061	-0.0650408	0.520562	0.586583	0.685609	-0.375628	0.223118	0.115887	0.977221	-0.0280054	-0.405575	-0.679548	-0.280268	-0.848417	0.747428	0.838963	0.204136	1.00498	0.43417	0.099757	0.0280054	0.930309	-0.233498	-0.0920379	-0.112236	-0.413419	0.250599	0.136333	0.138795	-2.56768	0.366853	-2.14542	0.736085	0.715324	-0.714658	-2.13873	-0.814992	0.388236	-0.475247	-1.2789	-0.0838602	-1.57115	0.166379	-1.59969	-1.16512	-0.484071
PAXBP1	-0.30037	0.348893	-0.198794	-0.377924	-0.302927	-0.0814486	0.212512	0.460317	-0.526556	0.0144763	0.732852	-0.0270014	-0.0541029	-0.36823	0.801662	0.197737	0.362579	0.306889	0.254108	0.625749	0.372874	0.409986	0.335915	0.0344052	-0.296527	-0.278337	-0.58196	0.383702	0.43362	-0.0445504	-0.178905	-0.27103	-0.790834	-0.337447	0.630217	-0.0144763	-0.391874	0.434063	0.400459	0.405047	-0.55011	0.22926	-0.159462	0.0334887	-0.432722	-0.150156
FAM9A	-0.206627	0.973962	1.06355	-1.78303	0.102626	0.395418	1.09896	-0.0380945	0.026597	-0.400335	0.14177	0.473226	0.449351	0.953602	0.15368	-1.42588	0.00874042	-3.20787	-0.484645	-0.0499864	-0.149807	-3.69493	-1.80128	0.950876	-2.85473	0.158065	0.389503	-0.00873995	1.22291	0.0273757	-2.32258	0.526034	-0.201678	0.283171	-0.406563	-2.38556	0.910522	-2.73888	-3.05573	-0.148536	-3.77509	0.524165	-0.0155249	-2.27771	0.946914	1.08759
BCL2L2	-1.09714	-0.160964	-0.292291	-0.142319	-0.154328	0.199526	-0.00263143	-0.661	0.701115	-0.203614	0.086961	-0.468942	-0.292073	-0.263963	0.00263143	0.0853546	-0.321092	-0.734329	-0.122732	-0.523076	0.0531666	0.412921	-0.114247	0.363444	0.0933979	0.242644	0.0145247	-0.0200994	-0.407806	0.734452	0.442767	0.102361	-0.0743663	0.555763	0.639647	0.526719	0.824166	0.590816	-0.168982	0.498113	1.02786	-0.522609	-0.176317	-0.771394	0.0117466	0.371154
FCHO2	-0.83899	-1.48612	0.387295	-0.991544	-0.703348	0.63577	-0.186836	0.0208509	0.721188	-0.0442426	0.301747	0.202359	-0.242392	-0.510188	0.427546	0.279205	0.887233	0.358029	-0.51183	-0.537926	-1.91662	-0.307609	-0.0151904	0.482518	-0.562752	-0.602983	0.792408	0.403812	-1.40963	0.550777	0.54859	0.333543	0.00572276	0.507156	-0.00572276	0.973084	-0.151581	-0.88811	0.593451	0.633771	0.334857	-0.442007	-0.512431	1.03712	-1.0349	-0.285212
STX19	-0.582129	-0.207197	1.13257	0.495765	-1.95459	0.377394	-0.505833	-0.316099	0.119381	-2.5545	-0.642796	-3.54757	0.13499	0.445192	-0.859503	-0.0450616	0.451404	-0.576327	0.0450616	-0.821438	-3.70673	-1.17936	-1.09376	0.0634131	-1.44795	-1.75274	0.684246	-1.38868	0.156707	-0.330835	0.967473	0.899385	0.54599	0.47541	-0.41197	1.18934	-1.26176	0.230913	0.213859	0.855551	0.228047	-2.50749	-1.96442	1.60907	0.699955	1.36896
PBLD	-0.39594	-0.800815	1.35975	1.41959	-1.59777	1.05471	-0.874826	-0.0833659	-0.243461	-0.743819	-0.195384	-1.4997	0.179607	0.617065	0.78617	-1.54163	-0.793899	0.387652	-0.716507	-0.0205131	-0.162082	-0.885192	-0.120293	0.697679	-0.95048	0.0205131	1.37094	-0.607186	1.39208	-0.11374	1.53367	0.569109	1.1	0.897978	1.16479	1.59248	-0.796279	0.327124	-0.29156	0.190253	1.21871	0.223692	-0.613569	0.989996	0.838779	-1.26585
IGHV7-81	0.701314	0.155753	0.417357	0.60452	-0.462898	-1.76532	0.0754156	1.4944	2.19046	-2.65709	0.0701747	0.931858	0.483909	-2.81733	-3.04573	0.339655	0.245851	-2.14884	0.354164	0.449697	0.461103	-3.02216	0.260371	-2.28716	0.133762	-1.90584	-1.43022	-2.061	-1.82817	-2.11717	0.0959172	-2.42587	-2.72241	0.0132184	1.49205	-0.736001	-0.0132184	0.543702	-2.35162	-1.69864	-0.977331	0.754444	-1.26437	-1.84102	-0.603375	0.103498
LOC100132686	-0.293334	0.136065	1.46718	0.877442	0.765163	-2.87939	1.90107	1.15329	0.559852	-0.476613	1.21827	0.626984	-0.153872	-2.69407	-1.22521	-1.81051	-0.757069	-0.4699	0.0157409	1.58247	0.502508	1.05642	1.64245	-0.709629	1.50411	-1.39037	0.917172	0.552106	1.33469	-1.25405	0.56595	-2.10471	-2.41613	-0.0106859	0.965043	-1.57509	-0.907589	-0.748773	-0.108698	-0.193626	-1.42525	-1.23846	2.36064	0.0106859	1.78114	-1.38651
LINC00508	0.274086	1.52661	-0.362858	-3.94734	0.0943086	-1.65742	-0.257594	0.655526	1.42307	-0.818373	0.418911	-0.325881	0.643938	0.86707	0.22699	-0.26189	-0.41295	-0.0136664	0.197225	-0.981274	0.224274	0.49269	-0.67057	-0.669085	0.34212	-0.141838	-0.751249	0.61114	0.818778	0.0136664	-0.032871	-0.158401	0.499193	-1.83673	0.716679	-0.450524	-2.51483	-0.0968249	-2.11124	1.99075	-0.132626	0.196007	0.735857	0.627149	0.926621	-0.270023
MTUS2-AS1	0.44031	0.521258	0.400873	0.771976	0.516151	-0.250414	-0.317116	0.508411	0.806724	-0.034977	0.00846481	-0.434412	0.380475	0.26875	0.851958	0.551281	-2.75679	0.268556	-0.192783	-0.383424	-2.04804	-0.442256	0.639985	0.421466	-0.110538	0.54238	-0.30198	-0.675614	0.0569863	-1.294	-0.901238	-4.31441	-0.0375266	0.43163	-1.3546	-0.172927	-1.16507	-0.00846481	-0.410497	0.490331	-0.797151	0.851058	-1.67155	0.762574	0.955927	0.484934
TAT	-1.37632	2.09748	1.74752	2.63851	-0.56173	2.18609	1.41873	-1.18161	1.12542	-0.667292	-1.23338	-1.14385	-1.28051	1.50874	2.04547	2.42044	1.40642	1.72128	-0.8068	2.38659	-0.516946	0.00616646	-1.29192	0.0131774	0.123292	-0.283598	-0.422763	-0.211955	-0.199947	2.46405	-0.221066	0.569719	1.19367	-1.37172	-0.240104	2.1127	-0.477905	2.26701	-0.0416889	1.43283	1.35593	-0.593851	-0.177129	-0.00616694	0.372896	-0.844284
FBXO36	-1.35753	1.688	1.38762	0.481637	1.2742	0.874527	0.581317	2.22461	1.66197	-0.839391	-1.48738	1.40411	0.497524	0.0725508	-1.2319	-0.133375	0.00236893	-0.567808	-0.420322	-1.4123	-0.0291405	2.59416	1.06998	-0.975181	1.78963	-1.52582	-0.8174	-1.13132	2.68695	-0.0583725	-1.83081	-1.86641	1.07933	1.78989	-2.16766	-1.19426	2.15871	-0.723022	-1.60402	-1.11033	-1.82626	2.73821	0.0621157	0.286831	-0.00236893	2.90857
LINC00421	-0.432433	0.105301	0.611079	1.4862	0.459595	-3.21564	1.35758	0.29649	1.68822	0.533274	-1.1711	-1.61747	-0.125709	-0.144971	0.927049	-0.148588	-1.07132	0.430328	0.5114	1.09848	-0.586329	0.053401	-0.154691	1.33492	0.688322	0.382223	-1.53348	0.00188255	-0.411064	0.0545025	-0.872587	-0.324445	-0.267489	-0.00188255	-2.93461	-0.357583	-0.676829	0.113737	-0.648809	-0.496928	-0.90193	-0.488071	0.877798	0.970315	0.814259	1.28383
[truncated: 19,257 more rows]
