# Supplementary material for: A 41-Gene Pair Signature for Predicting the Pathological Response of Locally Advanced Rectal Cancer to Neoadjuvant Chemoradiation
Source: Front Med (Lausanne). 2021 Sep 14;8:744295. doi: 10.3389/fmed.2021.744295 (PMC8476893; doi:10.3389/fmed.2021.744295)
Supplement: Supplementary file 8 [file Data_Sheet_8.XLSX]

## Sheet: gse35452_lable
	x
1	0
2	0
3	0
4	0
5	0
6	1
7	1
8	1
9	1
10	0
11	1
12	1
13	1
14	0
15	1
16	0
17	0
18	0
19	0
20	1
21	1
22	0
23	1
24	0
25	1
26	1
27	0
28	1
29	0
30	1
31	1
32	0
33	1
34	1
35	0
36	0
37	0
38	1
39	1
40	0
41	1
42	1
43	0
44	0
45	1
46	1
