# Supplementary material for: A 41-Gene Pair Signature for Predicting the Pathological Response of Locally Advanced Rectal Cancer to Neoadjuvant Chemoradiation
Source: Front Med (Lausanne). 2021 Sep 14;8:744295. doi: 10.3389/fmed.2021.744295 (PMC8476893; doi:10.3389/fmed.2021.744295)
Supplement: Supplementary file 9 [file Data_Sheet_9.XLSX]

## Sheet: gse45404_expr
	GSM1103623	GSM1103624	GSM1103625	GSM1103626	GSM1103627	GSM1103628	GSM1103629	GSM1103630	GSM1103631	GSM1103632	GSM1103633	GSM1103634	GSM1103635	GSM1103636	GSM1103637	GSM1103638	GSM1103639	GSM1103640	GSM1103641	GSM1103642	GSM1103643	GSM1103644	GSM1103645	GSM1103646	GSM1103647	GSM1103648	GSM1103649	GSM1103650	GSM1103651	GSM1103652	GSM1103653	GSM1103654	GSM1103655	GSM1103656	GSM1103657	GSM1103658	GSM1103659	GSM1103660	GSM1103661	GSM1103662	GSM1103663	GSM1103664
RFC2	6.98295	7.71798	6.9901	6.01493	6.89173	7.86457	7.06665	7.30639	8.03055	7.2075	7.81604	7.76988	6.45289	6.18922	7.59909	7.2781	6.82267	6.78778	7.4614	6.70003	6.94972	7.00696	7.31136	7.41464	6.4835	5.47226	6.78135	7.01181	6.90667	6.9433	7.09551	6.88086	6.95296	6.89431	6.45785	6.83009	6.78399	7.18357	5.98563	7.15659	5.72996	6.06116
PAX8	6.48593	6.60182	6.68024	7.29628	6.99985	6.9707	6.79386	7.42799	6.95175	6.57987	7.07568	6.73794	7.26125	6.71357	6.63067	6.84397	7.17115	7.12808	6.8512	6.89107	6.67796	7.57196	7.00402	6.80369	6.21941	6.86526	7.00249	6.68734	6.9154	7.20416	7.06872	6.84282	7.27189	6.39482	7.30251	7.22139	7.28467	6.85219	7.67775	6.8511	7.255	7.22169
ESRRA	7.69834	8.1453	8.03758	7.69064	8.00669	7.62681	8.12134	7.69267	7.74039	7.87543	8.86361	7.30732	7.66892	8.18492	7.18523	7.98864	7.94414	8.04837	7.99938	7.25175	8.6862	7.58624	8.03451	7.72541	7.43742	7.21216	7.90917	8.08331	8.02366	8.41198	8.25821	7.20533	7.75014	8.36484	7.57368	8.05296	7.92557	7.8629	8.12646	7.8014	8.62534	7.77378
SCARB1	8.10271	7.93668	8.42885	8.00048	7.48326	8.47239	8.36489	8.28144	7.8451	8.06196	7.62363	7.89345	8.00588	8.03334	8.35	6.97317	8.35562	8.25559	8.46514	7.83634	8.85618	8.19581	8.20308	7.3438	7.74396	7.61584	7.61866	8.31551	8.04428	7.89899	8.18175	8.49657	7.93119	8.6518	8.31706	8.33127	8.09027	8.25578	7.986	7.95435	8.35765	8.38954
TTLL12	8.62787	8.34743	8.54318	7.87408	8.53082	7.54081	7.84598	8.26273	7.80307	7.73578	8.31302	8.15182	8.43624	7.90085	8.43502	9.02955	8.50661	8.59312	8.59507	7.81206	8.26505	8.4918	8.71027	8.98022	7.90096	7.97738	8.90273	8.36776	8.77563	8.78822	8.45344	8.43572	8.61391	8.49879	8.6225	8.23588	8.01869	8.86467	8.40397	8.61704	8.74523	8.23371
CYTOR	2.70719	2.82793	3.06553	2.96862	2.98141	3.18274	3.22341	2.86314	2.79943	3.08758	2.81497	2.62863	2.86844	3.53311	2.94743	2.74904	3.1475	2.97443	2.86453	2.80513	2.66599	2.96673	2.71161	2.79837	2.91989	3.24303	2.80945	2.67089	3.06553	2.98557	2.73772	2.96371	2.96599	3.10404	3.27985	3.20314	3.22158	2.97355	3.30391	3.31787	3.37431	2.90434
ADAM32	3.42795	2.81085	3.45847	3.63481	3.26585	2.97443	3.89389	2.9591	2.93413	3.22629	2.87656	2.56555	2.74271	3.34656	3.01188	3.04235	3.59001	2.99897	2.77155	3.17828	2.94715	3.23144	2.69635	2.86971	2.59593	2.83288	3.33713	2.7586	2.5779	2.90077	4.02615	2.91949	3.02258	3.6887	3.02752	2.67016	2.72839	3.11582	2.97264	2.96325	4.95581	2.98761
PRR22	4.39683	4.3951	4.63989	4.29205	4.75626	4.43214	4.46283	4.64709	4.39622	4.6008	4.45214	4.07742	4.15717	4.41005	4.34446	4.67076	4.77701	4.27129	4.62722	4.38378	4.15737	4.39343	4.24306	4.45262	4.35006	4.43792	4.38197	4.30982	4.32539	4.19566	4.08441	4.33609	4.48002	4.30898	4.3167	4.56909	4.2104	4.20994	4.15162	4.44487	4.52015	4.63845
SLC46A1	5.24185	5.10357	5.58824	5.07983	5.61643	5.49409	5.16381	5.37937	5.17291	5.24372	5.38708	5.02297	4.80497	5.56319	5.1659	4.97108	5.63103	5.59106	5.56634	5.5454	5.05903	6.00318	5.63315	5.10038	5.21326	5.32286	5.0167	4.8623	5.16663	4.85801	5.08125	5.23452	5.38203	5.85172	5.91267	5.10925	5.21482	5.2772	5.51397	5.08375	5.22308	5.04909
TIMD4	2.57746	2.43688	2.82102	2.78045	3.05039	2.40785	2.33012	2.47568	2.33879	2.49362	2.49393	2.58704	2.61558	2.4832	2.26784	2.53502	2.68694	2.41812	2.66237	2.31634	2.41906	2.56531	2.92722	2.69035	2.57879	2.66788	2.49555	2.42405	2.39821	2.53646	2.34335	2.56708	2.34377	2.44473	2.36257	2.59359	2.6009	2.52056	2.71352	2.45917	2.59535	2.62231
SLC39A5	7.06284	6.52525	6.98095	7.68107	7.24505	7.52511	7.93014	6.18366	6.46592	5.86194	7.60952	6.0066	7.15891	7.64053	7.20509	6.72946	7.03969	7.49072	6.86883	7.30048	7.92594	7.08456	7.42806	6.86845	6.90491	6.29404	5.8809	6.81377	6.7422	7.29874	7.41083	7.40533	7.09735	7.18218	7.08102	7.06736	7.90541	7.14911	6.45234	5.95263	7.74485	5.78534
ATP6V1E2	4.25969	4.13218	4.65788	3.79661	3.88754	4.50442	3.96656	4.19747	3.84535	3.69318	4.29834	3.97488	4.187	3.70498	4.66212	4.46876	4.22373	4.10664	5.23484	4.13201	3.82427	4.63904	3.64795	4.2359	3.94589	4.10798	4.19537	4.33599	3.88369	3.9436	3.90879	3.90013	4.12331	4.69273	4.56213	4.17919	3.7878	4.07277	3.55413	4.53078	4.20439	3.92413
AFG3L1P	5.73644	6.02639	5.57678	6.11855	4.6102	5.66084	5.61382	5.19307	5.18662	6.13187	5.46078	6.43177	5.94128	6.01517	5.99887	5.11007	5.96906	5.71572	5.66634	5.18722	5.62781	5.31794	5.33344	5.35738	6.55978	6.42917	5.08646	5.65388	6.31778	5.59346	5.68793	5.887	5.64611	5.83239	5.85533	6.59859	5.57608	6.61665	5.99223	5.80685	6.42526	6.87699
CILP2	3.22479	3.11569	3.48577	3.24781	3.41421	2.87819	3.06991	3.16408	3.20565	3.05389	3.30015	3.33449	3.24095	3.32178	3.49343	3.4047	3.15361	3.20311	3.6198	3.31508	3.12954	3.39216	3.09609	3.13721	3.09704	3.02031	2.9766	3.17206	3.19207	3.06947	3.18278	3.47544	2.93425	2.94238	3.13155	3.31652	3.46761	3.43089	3.21161	2.91727	3.14188	3.30015
TMEM196	3.15081	2.96092	2.82102	2.95235	3.19616	2.67924	3.13608	3.34969	3.01311	2.94931	3.11149	2.64504	3.15808	2.96989	2.81647	2.83477	3.09875	3.19454	3.45445	2.93252	2.97884	3.15808	3.15385	3.1303	3.31145	3.15622	3.43054	3.14716	2.98309	3.14998	2.99096	2.95342	2.86581	3.03451	3.16969	3.1575	3.08713	2.7936	3.03468	2.99206	3.32645	3.01138
BEST4	3.14266	3.01838	2.66769	3.0394	2.79061	2.80359	2.72425	2.42607	3.07629	2.71259	2.81646	2.6841	3.34669	2.64702	2.48923	2.67118	2.72521	2.30439	3.48661	2.58396	3.12667	2.4523	2.87764	3.65093	2.9269	2.87779	2.73065	2.46253	2.861	3.23781	2.81796	2.72883	2.62592	2.96495	2.49452	2.82908	3.05168	3.19424	2.7583	3.95908	2.73898	2.5918
CORO6	3.12692	3.13551	3.61101	3.51164	3.67101	2.98362	3.33675	3.11587	3.01933	3.23422	3.09196	3.13149	3.18534	3.32781	3.09606	3.23021	3.44009	3.3314	3.57242	3.26189	3.2129	3.4205	3.28142	3.27966	3.38712	3.38144	3.33128	3.31302	3.17378	3.33021	2.98474	3.30507	3.45916	3.37458	3.29773	3.57642	3.65441	3.0991	3.86891	3.33477	3.27546	3.69018
ALG10	3.51027	3.19688	3.3666	2.95962	3.1084	3.5786	2.7071	3.4425	3.84727	3.03926	3.50926	3.94233	2.86599	3.00626	4.86757	2.94268	4.75555	3.67457	2.59389	4.1051	3.86997	4.77271	3.11907	3.12665	2.71613	2.65923	2.92125	2.8553	2.91657	2.67185	3.05439	3.19688	2.60168	2.89872	2.85701	3.07967	2.64667	3.34992	2.72087	2.9851	3.20238	2.5352
C15orf40	5.04618	6.50656	6.13367	4.75147	5.83491	6.71761	5.34772	5.55932	5.25209	5.10167	6.31149	5.57137	4.15147	4.84248	5.40963	5.29183	5.55024	5.91212	6.35481	5.30765	6.55867	5.4991	4.76647	5.78837	5.33322	4.933	5.73242	5.40713	5.48657	4.9674	5.81625	5.97622	4.90319	5.54769	5.79068	5.50398	5.4386	5.72255	3.76533	5.83876	6.93803	4.40579
RAX2	5.39	5.58237	5.74644	6.01589	5.69337	5.41269	5.40292	5.42069	5.56013	5.68643	5.54258	5.39197	5.77383	5.90252	5.37985	5.44316	5.4988	5.39963	5.05382	5.34675	5.463	5.41245	5.38093	5.60237	5.24042	5.87436	5.32223	5.39572	5.45485	5.3661	5.26529	5.49222	5.79507	5.79259	5.5616	5.53476	5.37613	5.34762	6.00266	5.44055	5.48649	5.70223
GIMAP1	5.68783	3.65887	4.81581	3.67852	3.70399	4.16617	5.25574	4.24372	4.33926	5.13651	3.26253	5.67673	3.58398	3.76697	3.5733	3.80672	4.2217	5.00254	3.62891	5.03961	4.00473	5.3044	3.99165	5.02305	5.38647	5.82259	3.54284	4.51474	4.62958	3.77753	4.47143	4.26949	3.89948	4.23624	3.90444	3.55639	4.49511	3.60519	3.69188	4.84976	3.72994	3.21486
CFAP53	3.0136	3.05675	2.97654	3.00941	3.31799	2.99615	3.07931	2.84252	3.08541	2.92702	3.0703	3.01804	3.30882	2.96409	2.99686	3.04197	3.18791	2.9564	2.97709	2.81365	3.09007	3.07456	3.06935	3.21537	2.89304	3.31518	3.09409	3.10282	2.98341	2.79577	2.84747	3.20563	3.13721	3.01147	2.69958	3.1644	3.03666	2.98593	3.14847	3.07059	3.62102	3.13279
CATSPER1	3.99557	4.16387	4.22074	3.99196	4.35199	3.81473	4.05573	4.23772	4.19497	4.16845	4.43204	4.17647	4.42921	4.10962	4.17692	4.09883	4.22506	4.02616	3.8535	4.31749	3.92515	4.42254	4.70333	4.23543	4.40367	4.07211	4.45468	4.01769	4.02049	4.12521	3.83975	4.17522	4.04093	4.16003	3.97459	4.0878	4.15058	4.20053	4.31293	4.19936	4.35516	3.86534
GSC	3.1017	2.81899	3.14878	2.61369	3.77985	2.81534	3.1274	3.01921	3.04611	3.22724	3.19555	2.76426	3.00354	3.10027	3.01545	3.20338	3.40732	2.83998	3.42479	3.16583	3.2435	3.30877	3.16049	2.92801	2.70015	2.85534	3.27969	2.68594	2.86547	3.16426	3.34422	3.08274	3.30465	3.01147	3.20505	2.99014	3.1777	3.09391	3.40813	2.80314	2.9371	3.20408
SP7	3.23957	2.9671	3.10273	3.31037	3.43819	2.67984	3.07724	3.05251	3.05497	3.2527	3.0984	3.0817	3.19887	3.05017	2.84985	3.13502	3.06232	3.24003	3.03754	2.88926	2.97437	3.15509	3.24825	3.01474	3.03359	2.85448	3.18549	2.85726	2.81572	3.04197	2.89686	3.03533	3.15709	3.18774	3.20117	2.93466	3.10105	2.89837	3.14513	2.86674	3.0895	2.87042
PRSS33	5.27468	5.20881	5.22778	5.14762	5.70313	6.23839	6.25107	6.63654	4.5967	7.56931	5.80367	4.92319	5.46228	5.73245	4.91195	4.96591	5.92099	7.59707	5.01745	5.13604	5.44798	5.93549	9.5794	5.51977	4.73208	6.9302	5.36348	8.12424	5.0529	5.44966	5.67359	10.3079	6.85455	5.5015	4.84114	5.17081	5.1279	5.24923	5.94073	4.72022	5.49903	6.46176
CBARP	3.88729	3.76377	3.53759	3.62706	4.38908	3.42153	3.62691	3.97891	3.51163	4.03953	4.05604	3.47237	3.7923	3.96222	3.79479	4.05025	3.57637	3.97408	3.79484	3.87093	3.63561	3.73161	3.83856	3.84765	3.45046	4.0193	3.71718	3.56812	3.4663	3.79144	3.59124	3.71337	3.72978	3.70266	3.67018	3.77605	4.11777	3.58439	4.11955	3.51511	3.69143	4.00136
LEAP2	4.92841	4.84251	4.6573	4.81553	5.85487	4.82569	4.25953	4.4953	4.99196	4.77641	5.53645	4.38295	5.15809	4.39245	4.54024	4.96942	5.1254	4.84262	5.03643	4.37532	4.64837	4.6069	4.70299	4.84475	4.83846	5.20404	4.85832	5.2423	4.87751	7.36523	4.37742	5.48074	5.36897	4.67521	4.55313	4.86958	4.8788	4.76237	4.61951	4.56843	5.19341	5.14316
CTCFL	2.39506	2.52504	2.35392	2.73142	2.38809	2.34837	2.47629	2.54449	2.37232	2.43773	2.20903	2.51037	2.31049	2.50149	2.49241	2.28817	2.19465	2.24376	2.27598	2.53094	2.375	2.74836	3.63415	2.39108	2.40973	2.22701	2.39569	2.21007	2.39301	2.52486	2.03894	2.23297	2.33997	2.3893	2.45118	2.52216	2.27895	2.40989	2.58532	2.17105	2.68833	2.20293
C4orf33	5.81223	6.12352	6.31858	4.55981	6.67567	5.32523	5.49563	4.99276	6.28267	5.44859	6.57381	5.06693	4.77398	4.72698	5.44148	6.10221	6.43095	5.26734	5.63916	5.91884	5.06881	5.97871	5.96153	5.98891	4.68236	4.79387	6.26849	6.02779	4.57802	5.55358	5.26988	5.72132	4.67271	5.17963	5.15522	5.13338	5.85618	5.27279	4.56674	5.83797	6.11645	4.95974
TVP23C	5.21951	5.21965	5.34123	5.23569	5.72505	5.05111	5.15455	5.34532	5.28142	5.49209	5.67552	5.1734	5.3124	5.45221	5.00434	5.28591	5.33406	5.26857	5.19843	5.32247	4.88803	5.47115	5.61213	5.20006	5.20966	5.22944	5.07921	5.19057	5.2699	5.24646	5.00024	5.39934	5.44542	5.33118	5.46014	5.245	5.35602	5.22547	5.52817	5.3005	5.25616	5.18784
FAM71A	5.50116	5.67541	5.67733	5.28734	6.25322	5.40179	5.74284	5.61824	5.27778	5.92281	5.8275	5.35193	5.842	5.86994	5.61967	5.64748	5.91998	5.61975	5.00541	5.5538	5.25603	5.67121	5.37596	5.68872	5.29021	5.60189	5.60417	5.53398	5.36262	5.45857	5.44484	5.67906	5.82744	5.56288	5.20707	5.54524	6.34382	5.29829	5.70062	5.5079	5.87791	5.4216
GAPT	3.23221	2.31012	2.29853	2.32765	2.25576	2.1473	2.21878	2.58728	2.28586	2.42573	2.26214	2.21487	2.41129	2.11755	2.4953	2.40233	2.41086	3.09943	2.15185	2.06521	2.14439	2.38206	2.34922	2.38224	2.33184	2.24092	2.14404	2.30966	2.23996	2.14867	2.35669	2.46766	2.21707	2.17002	2.09411	2.20401	2.33184	2.19233	2.65753	2.00639	2.29129	2.37246
ERICH5	2.95058	2.29745	2.14523	2.98907	2.28609	2.08467	3.26357	3.77154	2.07525	2.03273	2.04018	2.57136	2.11517	2.22184	2.05506	2.07323	2.81253	2.33435	2.06063	2.08451	2.87474	2.29129	2.48776	2.12583	1.9759	2.17408	2.06954	2.41436	2.66874	4.30528	2.35883	2.28165	2.42509	2.30463	3.43384	2.17687	1.94284	2.57136	2.17384	2.09486	3.03008	2.12901
CCDC185	2.98566	2.89083	3.16026	3.16559	2.89802	2.96312	3.25393	2.94888	3.01769	2.97757	2.93625	2.93625	2.84158	3.19125	2.93319	2.79894	2.93758	2.61603	3.22681	2.78907	3.04649	2.87411	2.96144	2.8256	2.83591	3.22724	3.06019	3.27595	2.79316	3.23983	2.72139	2.77579	3.17959	3.09227	2.61537	3.00201	2.94694	2.88933	2.64825	3.05868	3.26475	2.88371
ENTHD1	2.27447	2.26093	2.03988	2.05943	2.31312	2.18424	2.21812	2.15506	2.25291	2.19665	2.32634	2.07899	2.34772	1.98647	2.20597	2.2021	2.52506	2.21594	2.27924	2.32632	2.07767	2.25818	2.67718	2.10677	2.33723	2.19281	2.21392	2.06955	2.14725	2.12191	2.07226	2.11753	2.19062	2.21878	2.37404	2.33405	2.07895	2.31344	2.36246	3.0207	2.22798	2.01492
TSSK3	5.47752	5.66585	5.72154	6.04489	5.9778	5.63255	5.58241	5.78177	5.65118	5.65365	6.18881	5.56135	6.04398	5.6965	5.70816	6.00142	5.94977	5.74003	5.90816	5.84011	5.50017	5.86269	6.13468	5.54759	5.67931	5.72608	5.78149	5.40554	5.68502	5.51091	5.61752	5.94673	5.97453	5.6739	5.64074	5.80812	6.23641	5.55195	6.06725	5.31599	6.03081	5.59062
WFDC6	2.9469	2.9615	3.04059	2.74771	3.26289	2.71135	2.65433	2.80169	2.74814	3.07366	3.12191	2.66476	3.00005	2.79136	2.90489	2.97159	2.97007	2.91774	2.86216	2.6557	2.97129	2.80059	3.11161	2.92872	2.63885	2.86864	2.80463	2.76529	2.88762	2.82288	2.4909	2.97494	2.86951	2.96125	3.2772	2.95464	2.99047	2.89429	2.88406	2.8607	3.22012	2.91085
CLEC12A	2.52839	2.46971	2.74803	2.6035	2.59491	2.31094	2.37731	2.14082	2.46593	2.84413	2.3201	2.74584	2.40502	2.65129	2.56857	3.52791	2.67776	2.82736	2.20881	2.60998	2.54812	2.74232	2.43653	2.88446	2.50766	2.46762	2.3597	2.29424	2.38374	2.19024	2.45665	2.55345	2.33581	2.56373	2.19858	2.43981	2.52118	2.10238	2.0549	2.74549	2.12034	2.06391
TMEM266	3.18275	2.85413	3.2643	2.96131	3.45336	2.86959	3.31793	2.95979	3.14753	3.16332	3.16985	2.86282	3.22124	3.03906	2.99862	3.01583	3.20504	3.03906	3.21966	3.13444	2.94875	3.04293	3.10823	3.07956	2.82553	3.16499	3.20557	3.14413	2.85233	3.18689	2.76577	3.04852	3.49368	2.96348	3.09782	2.95559	3.15765	3.06797	3.17247	3.0134	3.24892	3.15196
CALML6	2.63358	2.47932	2.48268	2.5615	2.93449	2.56314	3.10895	2.65805	2.20228	2.62673	2.87709	2.43952	2.70959	2.63753	2.56531	2.72016	2.57045	2.44043	2.81593	2.52076	2.49029	2.45396	2.59706	2.64162	2.51993	2.5974	2.50759	2.54281	2.82376	2.55837	2.5619	2.42904	2.56558	2.56373	2.30142	2.44888	2.81604	2.34846	2.3517	2.48532	2.88109	2.54311
NLRP5	3.36083	3.05337	3.17414	3.42581	3.83265	2.8925	3.07186	3.49254	3.79874	3.28685	3.47942	3.25798	3.08598	3.50948	3.31182	3.2717	3.40978	3.18902	3.11395	3.08517	3.12749	3.35056	3.72937	3.16919	2.9704	3.44277	3.05187	3.53151	2.87183	3.17758	3.11358	3.35131	3.43946	3.1133	3.4419	3.24811	3.58341	3.04374	3.38757	2.98862	3.58937	3.17172
ODF4	4.33757	4.39121	4.83282	4.62826	5.26556	4.52495	4.83286	4.48907	4.99061	4.67703	4.84486	4.46794	4.44217	4.29661	4.73691	4.87801	4.24399	4.48701	4.43495	4.6594	4.34938	4.57957	4.9301	4.51177	4.25774	4.57788	4.591	4.74719	4.30142	4.74291	4.3573	4.84472	4.62025	4.91617	4.71165	4.62971	4.34413	4.07199	4.52121	4.84066	4.84115	4.50434
CLEC4F	3.7421	3.93477	4.04755	4.13782	4.27874	3.89585	3.87802	3.92629	3.80755	3.62669	4.00053	4.04269	3.75611	3.74153	3.72055	3.94212	4.00819	3.82356	3.97689	4.34789	3.81316	4.25917	3.87447	4.03389	3.75729	4.03775	4.07266	3.58747	3.85716	3.70609	4.02791	3.95077	4.12124	3.80344	4.00359	4.25242	3.9709	4.05467	4.29822	3.96417	3.68961	3.86572
WFDC9	2.90808	3.12716	3.25399	3.04362	3.42993	2.85013	2.80567	2.9721	3.36213	3.4183	3.44833	3.00819	3.26594	3.14344	3.18135	3.27799	3.19645	2.98574	3.08342	3.17998	3.08452	3.30013	3.22945	3.12585	2.57784	3.27307	3.30892	3.41611	3.19266	3.03766	2.85044	3.3454	3.46822	2.93851	2.9448	3.10822	3.27161	3.11774	3.48425	3.05249	2.93404	3.00097
TTLL10	4.82649	4.65592	4.74209	4.9488	5.1811	4.47615	4.73119	4.77516	4.6463	4.68558	4.62648	4.47188	5.0899	4.83557	4.216	4.77147	4.63595	4.75356	4.64015	4.40935	4.63424	4.66905	4.62556	4.65805	4.36737	5.06057	4.50953	4.72293	4.523	4.54042	4.42704	4.61868	4.84332	4.60797	4.93222	4.68345	4.68928	4.43765	4.56834	4.36152	4.64985	4.60705
CALR3	2.50786	2.57249	2.39856	2.24376	2.72187	2.09678	2.26315	2.36533	2.36795	2.23001	2.38768	2.25414	2.03551	2.52365	2.18335	2.29356	2.54959	2.29846	2.51679	2.10263	2.48219	2.41375	2.34417	2.48048	2.23168	2.43655	2.14952	2.64989	2.30816	2.26088	2.31976	2.21139	2.30259	2.24422	2.39856	2.39272	2.39415	2.26009	2.27044	2.31112	2.22315	2.67209
C10orf25	3.99697	3.58202	3.45226	3.49955	4.63742	3.56603	3.85117	3.83975	3.39757	3.67584	4.07669	4.06935	4.03628	3.56	4.31237	3.74645	3.96425	3.46218	3.52015	3.83682	4.01223	3.80135	3.82699	4.4833	3.68062	4.03742	4.51351	3.83385	3.79177	4.19691	4.10034	3.68964	3.66423	3.49801	3.98189	4.02793	4.25234	3.42703	4.39071	3.67121	4.06457	3.83496
KLHL10	2.92705	2.87741	3.1482	2.5228	3.05919	2.87741	3.23713	2.87331	2.92355	3.09118	3.02022	2.54515	2.86486	3.55433	3.05644	2.9121	2.92427	2.88876	2.87073	2.75257	2.63017	3.03624	2.81748	3.00985	2.81949	3.3583	2.81156	2.68751	2.9407	2.81241	3.01365	3.02745	2.41627	3.05161	2.75168	2.71098	3.26889	2.49311	2.75381	2.73563	2.87741	3.16618
ZNF485	3.04913	3.20416	2.78167	2.55754	2.94449	3.00011	3.22243	2.85539	3.20288	2.85539	3.12662	2.96189	3.24088	3.11832	3.23946	2.70125	3.20447	2.98304	3.185	2.93106	2.9389	3.16079	2.96827	3.19305	2.77738	2.85722	2.9798	3.07721	3.45636	3.13677	3.18839	2.62715	2.81265	3.03674	2.62153	2.7331	2.93275	2.61086	2.37404	2.98814	3.26049	3.10507
WDR17	2.05138	2.15937	1.95765	2.02444	2.4115	2.08269	2.28717	2.21595	2.30096	2.21619	2.01631	1.99362	2.04298	2.00334	2.40031	2.10105	2.20669	2.14026	1.98359	2.10802	2.05086	2.0039	2.23688	2.32244	2.23789	2.13333	2.02527	2.16633	2.04049	1.99469	2.14026	2.03352	2.06669	2.08303	2.15721	2.43604	2.04298	2.34867	2.19158	1.79119	2.02613	1.9529
MFSD6L	3.32817	3.134	3.46656	3.46715	3.62257	3.13248	3.31591	3.45597	3.71771	3.38259	3.49611	2.96677	3.1489	3.09781	3.40325	3.44835	3.38472	3.30396	3.21476	3.60188	3.13478	3.82824	3.29456	3.36457	3.22098	3.37111	3.2708	3.37121	3.00064	3.38638	3.45336	3.29113	3.32849	3.27221	3.40034	3.78352	3.13276	3.35589	3.36774	3.1665	3.18047	3.21034
ESX1	2.49127	2.35728	2.45586	2.5581	2.42367	2.27737	2.3351	2.49026	2.6423	2.32766	2.50594	2.41534	2.23009	2.25294	2.49573	2.55942	2.6407	2.29655	2.32484	2.33529	2.60239	2.28681	2.42199	2.46501	2.18954	2.4139	2.42574	2.31689	2.34611	2.35377	2.24696	2.5061	2.28282	2.54133	2.29316	2.28567	2.17763	2.35742	2.51545	2.39397	2.23152	2.29627
FAM167A-AS1	2.62002	2.362	2.81444	2.56067	2.67224	2.43671	3.01194	2.53703	2.61123	2.46813	2.75526	2.58599	2.61362	2.6646	2.49391	2.78204	2.56991	2.49391	2.32375	2.57865	2.54812	2.66491	2.62274	2.55196	2.4703	2.65443	2.68686	2.56816	2.62002	2.68742	2.56977	2.62046	2.83213	2.45794	2.68526	2.67672	2.42291	2.83605	2.62617	2.48796	2.58909	2.60946
DNAJC5G	4.51003	4.59316	4.34655	4.68248	4.71645	4.16564	4.40381	4.42829	4.35469	4.68915	4.70463	4.61954	4.65109	4.46358	4.49439	4.42664	4.13727	4.62257	4.57129	4.652	4.13725	4.98036	4.71922	4.66048	4.38487	4.31799	4.22206	4.18794	4.24854	4.45175	4.44722	4.636	4.552	4.41755	4.63226	4.66806	4.6182	4.87032	4.47578	4.4541	4.43056	4.20939
WDR88	2.31151	2.71458	2.56416	2.66594	2.98525	2.50881	2.35449	2.45905	2.77095	2.6094	2.57214	2.47468	2.36115	2.55991	2.57293	2.90524	2.5557	2.53456	2.71946	2.67856	2.61268	2.79353	2.72759	2.48609	2.49555	2.74686	2.91609	2.68411	2.51873	2.4681	2.56418	2.65031	2.56912	2.85679	2.73419	2.56418	2.60743	2.54324	2.85194	2.58126	2.44604	2.94816
MBD3L2	3.46006	3.69318	3.53012	3.89113	3.60625	3.45859	3.61774	3.62888	3.45859	3.26462	3.55876	3.22475	3.18376	3.55233	3.59028	3.64148	3.50202	3.72085	3.29006	3.35734	3.50537	3.90497	3.71845	3.25882	3.15201	3.73792	3.31727	3.87124	3.40619	3.64643	3.25048	3.51575	3.58876	3.29392	3.55773	3.37467	3.4634	3.49834	3.82372	3.39467	3.63518	3.50071
MBD3L1	2.97761	2.80014	2.36249	2.75479	3.0168	2.57068	2.68411	2.79553	2.73428	2.8171	2.78153	2.44734	2.94524	2.79658	2.62138	2.71867	2.85416	2.63566	2.919	2.80909	2.71867	2.94829	2.5567	2.53421	2.66052	2.85213	3.30039	2.8377	2.46232	2.83196	2.6749	2.30047	2.56558	2.71306	2.81444	2.66485	2.651	2.78875	2.92455	2.67942	2.67734	2.74779
TENT5D	2.35592	2.18925	2.14584	2.03942	2.27407	2.10957	2.05773	2.05207	2.04184	2.09846	1.97855	2.06791	2.15253	1.98713	1.96503	2.35156	2.56209	2.15234	2.22852	2.20582	2.14389	2.16015	2.23332	2.17706	1.99211	2.17982	2.18694	2.1777	2.14584	2.31493	2.27844	2.27817	2.22071	2.04152	2.57736	2.14516	2.23756	2.18661	2.18901	2.0992	2.11418	2.13584
SERPINB11	2.30298	2.23607	2.25402	2.33641	2.29246	2.16141	2.35496	2.36729	2.38461	2.34429	2.53416	2.15983	2.42714	2.25203	2.14353	2.39731	2.39983	2.20938	2.39771	2.20376	2.30812	2.25919	2.23893	2.37105	1.89079	2.41405	2.42104	1.99684	2.39693	2.34054	2.03678	2.15232	2.54727	2.1271	2.16141	2.08141	2.38505	2.26137	2.30501	2.09083	2.62951	2.1575
DSCR10	5.35963	5.35055	5.28249	5.52149	5.63377	5.42182	5.36789	5.42909	5.27635	5.39728	5.65692	5.39125	5.32858	5.31537	5.26593	5.49269	5.53226	5.26666	5.37466	5.33399	5.28341	5.54879	5.50645	5.40396	5.37631	5.68581	5.33659	5.30713	5.26029	5.39424	5.24328	5.55168	5.49014	5.49076	5.55955	5.4065	5.55753	5.39514	5.87026	5.20321	5.53367	5.12744
GAMT	6.31907	6.04012	6.32766	6.15767	6.7175	5.87014	6.63958	6.23558	6.19544	5.96686	6.55362	6.14448	5.80427	6.15065	5.76479	6.55753	6.29087	6.28604	6.62065	6.00095	5.61097	6.55861	6.78644	6.3608	5.84003	6.15866	5.8952	6.4161	5.84941	6.03595	5.82017	6.12455	6.40981	5.90951	6.24743	6.1802	6.36142	6.04795	6.65922	6.20991	6.18967	6.21849
AFG1L	2.80706	3.07735	2.39537	2.7925	3.01194	2.68613	2.62786	2.85039	3.42173	2.85954	2.65917	2.59444	2.75115	2.69718	2.73951	2.73927	2.99378	2.91978	2.55911	2.84461	2.55157	2.52905	3.02228	2.52399	2.59827	2.44214	2.80945	3.18736	2.62859	2.81348	2.56742	2.88896	2.79756	2.63273	2.47444	2.79796	2.52118	3.05463	2.71422	2.54091	2.52583	2.82729
IDI2	3.95199	3.9789	4.46202	4.29581	4.40279	3.83506	3.7578	3.76862	3.68707	4.21439	4.2266	3.92378	4.24622	4.07752	3.98132	4.02808	4.008	3.99579	3.99748	3.98225	3.75652	4.12316	3.96962	4.2359	3.99827	3.95608	3.89551	3.94058	3.99395	3.7785	3.78313	3.89319	4.29269	3.73041	4.051	3.71389	3.82818	3.89713	4.22289	4.11074	4.31228	4.06264
CYP11B1	2.87082	2.93162	3.30085	2.62859	3.26504	2.87321	2.96162	2.90822	3.07764	2.84793	3.06911	3.12436	3.01597	3.24218	2.96599	3.09568	3.18184	2.88669	2.9813	2.87187	3.04491	3.02377	3.07596	3.05231	2.90449	2.78246	2.97199	2.93879	2.9991	3.05732	2.90765	3.02141	2.88921	2.9947	2.70957	2.84397	3.10248	2.97908	3.14878	3.06667	2.91805	2.67209
SLAMF6	4.82047	3.90703	4.79363	4.89827	4.70026	4.06711	4.29008	4.72798	4.26756	4.74041	4.4345	4.08393	4.4947	4.40882	3.99681	4.32568	4.36321	4.24604	3.68354	4.16041	4.32089	4.84657	4.6977	4.61827	4.44435	4.96085	4.04469	4.22345	4.23577	4.25076	4.18512	4.44064	5.04717	4.41112	4.72083	4.46687	4.11688	4.30084	4.79569	4.37754	4.76284	4.21591
ZSCAN20	3.34006	3.26761	3.06555	2.94273	3.33639	2.92017	3.2861	3.04044	3.42907	3.57832	3.46016	2.78698	3.49027	2.97867	2.80902	3.131	3.2797	3.21852	3.64459	3.05936	2.92236	2.95876	3.65761	3.16316	3.09355	3.07036	3.30134	3.30139	2.94346	3.09971	3.19116	3.46836	3.28433	3.20218	3.24774	3.15314	2.85699	3.19669	3.4409	3.05115	3.23081	3.01775
GPBAR1	4.51169	4.48384	4.65274	4.58882	4.64497	4.72844	4.92313	4.68136	4.25345	5.0077	4.87555	5.13831	4.72039	4.95147	4.76455	4.64755	4.59071	4.57653	4.95258	4.95495	4.62979	4.28131	4.87016	4.80447	4.68245	5.59409	4.56445	4.43929	4.46166	4.60329	4.18838	4.83718	4.74817	4.57555	4.6151	4.65491	5.08588	4.45351	4.90555	4.62769	4.28577	4.80499
BRSK1	7.08452	7.14339	7.08251	7.48848	7.38195	6.67781	6.71255	7.02847	6.69396	6.95325	7.19647	6.28705	7.44487	7.26146	6.45997	6.59996	7.08837	6.81423	6.70631	6.6112	6.82649	6.92582	6.63171	6.92207	6.572	6.45696	6.57089	7.24772	6.95867	7.04831	6.7702	7.05194	7.05128	7.02289	7.52788	7.1593	7.10659	6.95366	7.67507	6.43531	7.36505	6.77294
CRB2	2.53685	2.63317	2.95136	3.04833	2.99548	2.85388	3.23276	2.82042	2.77284	3.02342	2.56629	2.40061	3.42166	3.06616	2.67197	3.14133	2.52044	2.36558	2.73721	2.61781	2.8128	2.78776	3.57383	2.80289	2.4934	2.66052	2.67231	2.62834	2.77335	2.87013	2.5508	3.12083	2.90239	2.80907	2.6264	3.27695	2.69794	2.54976	2.8543	2.61364	3.09325	2.72506
SLC34A3	6.33856	6.34793	6.66248	6.46408	7.10117	6.2908	6.37675	6.6545	6.6194	6.5962	6.64693	6.19303	6.5228	6.55366	6.25246	6.55994	6.62053	6.51414	6.50713	6.43304	6.35041	6.71012	6.62327	6.2701	6.39578	6.35726	6.50346	6.46108	6.39758	6.45463	6.25474	6.59736	6.83683	6.45154	6.69857	6.45609	6.28123	6.32821	6.84654	6.20116	6.65731	6.33144
CPA6	2.12793	2.65566	1.98281	2.03684	2.45595	2.22124	2.51192	2.27041	2.78251	2.05425	2.24838	4.09587	3.02715	2.16471	2.83209	2.29825	2.74509	2.13688	5.65947	2.27974	3.03508	2.58411	2.51717	2.47454	2.04149	2.05203	2.19209	2.31735	2.11914	2.86616	2.25576	2.54605	2.18823	2.22289	2.16552	3.14297	3.17662	2.24562	2.23127	1.91998	2.14343	2.5918
WBP2NL	2.30834	2.28776	1.89089	2.20364	2.27551	2.13905	2.1304	2.17685	1.9695	2.10788	2.39375	2.09182	1.87228	2.15945	2.23863	1.96658	1.95151	2.06922	2.31256	1.97324	2.07473	2.07589	2.10249	2.19496	1.95151	2.05132	2.25884	2.37222	2.46887	2.05944	2.14389	2.23019	1.92368	2.14913	2.13303	2.17715	2.17992	2.0444	2.31661	2.12232	2.53803	2.23058
MTBP	3.07898	3.11879	2.80414	3.22433	2.74527	3.23372	2.93165	2.92766	3.03461	3.09367	3.12436	3.33548	3.03099	3.16436	2.90464	2.9266	3.22433	3.23418	3.08942	2.76881	2.9474	2.82887	3.11321	3.18632	3.3516	3.09595	2.95472	3.19116	3.68434	3.53813	3.04967	3.18533	2.79038	3.04575	2.92639	3.21026	2.76231	3.30084	3.09224	3.21093	3.18717	3.71241
ACVR1C	4.92406	6.34511	7.29913	7.56588	5.81941	6.42311	6.76398	5.87262	5.99867	5.57431	4.52153	4.09229	3.56928	6.93603	7.03452	4.95785	5.54507	4.86713	5.50248	6.69011	7.83045	5.61952	4.57196	5.29142	3.11794	6.31217	5.32097	5.69051	5.72662	3.73625	5.07069	3.07788	6.1334	6.44554	5.36195	3.40156	6.50963	6.03035	6.43737	5.54474	5.94107	4.47681
TIGD4	2.88119	2.9282	2.82514	3.23197	2.90938	2.807	2.96505	2.76831	3.01544	2.61863	2.87171	2.40837	2.79925	2.91905	2.97968	3.16395	3.11366	2.85074	2.65739	2.98809	2.92773	3.4352	2.82898	3.01073	2.67103	2.70112	3.12473	2.54764	3.02993	2.92987	2.8195	2.67273	2.89719	2.90738	2.68607	2.7325	2.91143	2.75912	2.6322	2.89116	2.70227	2.67209
ART5	4.94825	5.00504	5.08907	5.50891	5.46567	4.68364	4.91325	4.89782	4.68618	4.89906	5.37805	4.75296	4.83313	5.09164	4.81701	5.00849	4.92799	4.93434	4.87766	5.07813	4.69643	4.91757	5.18196	5.12031	4.61552	5.22009	4.81581	4.85036	4.78522	4.85351	4.57406	5.05437	5.11212	4.88215	5.05307	5.16155	5.12997	4.64232	5.19612	4.79236	4.84236	4.85351
FAM71C	2.72061	2.59221	2.36803	2.79692	3.19616	2.62347	2.77432	2.72326	3.05437	2.69447	2.85344	2.53072	2.94524	2.64199	2.64685	2.87767	2.70789	2.51291	2.81903	2.65936	2.79744	2.82062	3.32044	2.7791	2.53241	2.94024	3.05474	2.92285	2.56373	2.87677	2.49219	2.76709	2.8851	2.76895	2.79523	2.64547	2.75842	2.82246	2.83953	2.59909	3.09204	2.74779
LINC01547	4.90661	4.969	5.03768	5.04834	5.19717	4.57281	4.99958	5.04536	4.79993	4.94143	5.32246	4.78559	5.08331	5.19196	4.76401	5.32542	4.92285	5.00051	5.08467	5.137	4.95716	5.20476	5.16029	4.95826	4.79933	5.22176	4.96329	4.95495	4.93585	4.6815	4.94589	4.89871	5.17708	4.81024	4.9598	4.80137	5.20168	4.85012	5.23849	4.55041	4.99205	4.9311
NLRP11	2.68731	2.55292	2.28109	2.32156	2.87959	2.26339	2.7566	2.49644	2.39029	2.3389	2.47868	2.75547	2.39358	2.78788	2.34273	2.47413	2.63814	2.3649	2.42237	2.49307	2.53607	2.80228	2.27818	2.42826	2.36979	2.518	2.2279	2.75414	2.69718	2.47647	2.52905	2.47409	2.76311	2.50736	2.55902	2.48203	2.50803	2.47706	2.77876	2.35582	2.53874	2.48322
IQCD	2.98493	3.28519	3.47079	2.79386	3.52606	3.0359	3.57215	3.56245	3.43628	3.70465	3.04224	3.29555	3.27757	3.38743	3.38507	3.1928	3.34006	3.35734	2.91438	3.04797	3.29637	3.19668	3.46992	3.21585	3.1201	3.21818	3.68889	3.52197	3.13156	3.52197	3.29161	3.38006	3.03751	3.19313	2.92614	2.85998	3.54662	3.0288	3.27948	3.27011	3.29552	3.16948
TAGAP	4.67852	5.19216	4.69616	5.20449	5.13928	4.74841	5.06948	4.88607	5.09304	4.89417	4.95495	5.07561	4.99704	4.98539	4.76115	5.19918	5.21441	5.01328	4.96652	5.24106	4.72985	5.14652	5.22871	4.91099	4.93758	4.93927	4.94266	4.83481	4.63111	4.77967	4.67123	5.16636	5.16101	4.96169	4.97851	5.01679	4.87964	4.95616	5.19584	4.70619	4.96402	4.67441
SERPINA12	3.06318	2.99049	3.06092	3.12073	3.35916	2.86522	3.03723	3.1759	2.98216	2.8851	3.20629	3.20241	3.11757	3.2241	2.96205	3.57385	3.17625	2.78589	3.36598	3.13545	3.04351	3.30236	3.03125	2.89696	2.86413	3.20629	3.01713	2.80218	2.71719	2.92753	2.81815	3.00872	3.07659	3.07386	3.12672	3.07742	3.07176	3.04729	3.16496	2.87176	3.04152	2.98916
CLEC4C	2.48418	2.46207	2.35259	2.27719	2.47712	2.19308	2.48085	2.47938	2.31529	2.27773	2.57883	2.36689	2.27176	2.49325	2.37439	2.38148	2.4687	2.37249	2.55574	2.54905	2.20162	2.37905	2.51985	2.37202	2.12846	2.33382	2.24496	2.43986	2.40706	2.43189	2.186	2.26654	2.34146	2.31848	2.46066	2.10926	2.42804	2.5046	2.44232	1.96857	2.28398	2.1942
NLRC4	3.60168	3.3504	3.41854	2.9505	2.9501	3.33175	3.89247	2.95336	3.33876	3.55292	3.05585	3.63403	3.43013	3.44239	3.30439	3.62161	3.46842	3.31954	2.85915	3.36273	3.46923	4.21231	2.76737	3.92556	3.77183	3.51965	3.3429	3.21749	3.2364	3.11076	3.2552	3.06011	3.20301	3.54671	3.39876	3.18533	3.02832	2.85742	3.25925	3.66063	2.95717	2.84243
PRSS36	4.21824	4.35847	4.49799	4.25086	4.71278	4.41865	4.33389	4.64197	4.09803	4.27701	4.82021	4.24482	4.21164	4.17663	4.48869	4.40794	4.3336	4.28457	4.43284	4.62525	4.1193	4.43525	4.55933	4.7069	4.34582	4.14167	4.13118	4.06512	4.20322	4.9865	4.18864	4.54742	4.65042	4.23621	4.59008	4.25891	4.1976	4.37281	4.66065	4.01222	4.51203	4.1008
ZDHHC15	2.16512	2.23531	2.34645	2.5792	2.35812	2.30556	2.31847	2.32199	2.42603	2.52035	2.61533	2.3207	2.21256	2.19175	2.45929	2.2058	2.36946	2.30333	2.38615	2.44031	2.46646	2.33068	2.23297	2.26814	2.51576	2.33055	2.46169	2.14067	2.10861	2.3776	2.37404	2.28989	2.38506	2.27145	2.44847	2.19207	2.24382	2.50736	2.28265	2.14639	2.39045	2.3985
ZNF570	3.12218	3.3229	3.36914	2.90049	2.91264	2.51415	3.11608	3.18652	2.73065	3.05171	2.52793	3.59704	3.04086	2.80642	3.52213	2.94318	2.69933	3.05293	2.70905	2.95414	2.74938	2.91334	3.14729	2.82261	2.95631	3.04406	2.80603	2.84252	2.32558	2.76705	2.66235	3.09742	2.8851	2.511	2.68291	3.31856	3.14019	3.35235	2.9473	3.10978	2.92725	3.01063
NUDT9P1	2.50277	2.10582	2.20456	2.25035	2.555	2.16126	2.07772	2.10259	2.24977	2.42305	2.34881	2.44212	2.538	2.48045	2.21135	2.34115	2.1426	2.15175	2.33268	2.37747	2.48225	2.0338	2.25027	2.31811	2.27747	2.03465	2.49555	2.33505	2.20104	2.49097	2.21756	2.28593	2.14551	2.24021	2.13535	2.07415	2.33479	2.18661	2.37404	2.15986	2.1564	2.2233
BTBD16	2.4826	2.59537	3.10352	2.61852	3.02884	2.61929	3.02672	2.6197	2.9205	3.09083	2.96399	2.71244	2.87258	2.8574	2.8851	2.81343	2.70962	2.36421	2.7537	2.74224	2.59978	2.77429	4.3741	3.14447	2.71854	2.58683	3.27768	2.63753	2.36713	2.63205	2.59526	2.64063	2.94676	2.27447	2.40655	2.75386	2.75618	3.00983	2.71126	2.75858	2.71034	2.8191
RTP3	2.93191	2.85906	3.30324	3.11078	3.57013	2.57095	3.0093	3.16973	3.82965	3.08843	3.42243	2.98052	2.98226	2.80557	2.96253	3.24089	3.65246	3.03839	3.19267	3.07314	3.00445	3.56817	3.56689	3.34006	2.95122	2.79396	3.02906	2.77467	3.00332	3.03912	2.98178	3.04883	3.17956	2.96297	3.18276	2.89409	3.04202	3.11042	3.15531	2.76438	2.96899	2.93706
C6orf141	3.84332	4.33823	4.99752	4.25569	5.17043	4.81702	4.00227	4.12453	4.77847	4.18521	4.59491	6.79872	6.65832	5.17992	4.95716	5.12281	5.32542	4.56796	4.75195	5.20668	4.25845	4.92935	5.37596	5.23432	5.1823	4.06811	6.67509	4.2871	5.4243	4.65943	4.52027	5.5017	3.95151	4.90863	6.75812	4.75532	4.05587	6.50522	5.93372	4.30656	5.10779	5.8631
ALMS1P1	2.9931	2.88041	2.93894	3.32401	3.43282	2.73466	2.92846	2.93414	3.07742	3.04592	3.24648	2.74916	2.95905	3.01857	2.6779	3.01799	2.94444	2.77133	2.917	2.89544	2.78907	2.72234	2.71048	2.76539	3.03505	3.03844	3.00094	2.84174	2.87473	3.01973	2.8639	2.9846	3.01127	2.99939	3.11575	2.97163	2.93299	2.7936	3.29425	2.68075	3.0766	2.74318
ADAM21	2.82366	2.66335	2.86881	2.82926	2.988	2.54811	2.62966	2.65465	2.69202	2.88172	2.77868	2.47061	2.63668	2.48045	2.77188	3.06644	2.71745	2.44878	2.59479	2.88743	2.62651	2.68124	2.69462	2.5101	2.69827	2.53153	2.81165	2.61857	2.68584	2.55551	2.71084	2.71137	2.91881	3.08919	2.62638	2.87721	2.59679	2.64825	2.79907	2.63668	2.54927	2.66963
TRIML2	3.72337	3.53978	3.89531	3.37318	3.32301	3.64876	3.60018	3.40243	3.3531	3.6185	3.77243	3.44273	3.53648	4.15037	3.15834	3.70341	3.60196	3.38233	3.30476	3.23624	3.76905	3.53092	3.66965	3.46007	3.37106	3.48135	3.6214	3.53967	3.49038	3.70013	3.591	3.38324	3.50039	3.81384	3.33555	3.18787	3.98126	3.22068	3.18249	3.39446	3.62102	3.52662
GTF2A1L	1.93439	2.13288	1.98302	2.15196	2.16197	2.10466	2.05316	2.20063	2.12409	2.35748	2.19942	2.06401	2.34762	1.94042	2.31259	2.1465	2.18335	2.08914	2.03091	2.36791	2.18907	2.57166	2.21527	2.21347	2.20063	2.36951	2.19399	1.99362	2.13644	2.25839	2.18891	2.16202	2.30469	2.17919	2.57377	2.31406	1.93809	2.12568	2.18525	2.42535	2.10088	2.1205
TRPV3	3.96686	4.0212	4.45471	3.90505	4.56479	3.53721	3.92319	4.19445	4.16734	4.24108	4.043	3.79654	3.98992	4.15763	3.9913	4.48149	4.07096	4.04001	4.10358	3.99258	3.93345	4.0414	4.3301	4.05809	3.28452	4.09331	4.05181	4.15758	3.72622	3.94586	3.77478	4.18831	3.85418	3.72804	4.13764	3.7547	3.95701	3.56578	3.98675	3.76193	3.95444	3.93615
CNBD1	2.33405	2.45038	2.2724	2.40888	2.46072	2.24806	2.28176	2.26979	2.31255	2.33739	2.71733	2.42393	2.1902	2.17076	2.29985	2.37646	2.47081	2.53333	2.33372	2.26793	2.19979	2.21328	2.19876	2.05748	2.19842	2.36629	2.2892	2.23381	2.14791	2.29025	2.24395	2.23181	2.35674	2.16572	2.26661	2.16764	2.38491	2.22339	2.42505	2.0466	2.35524	2.1205
MMP21	2.11167	1.94852	1.90908	2.12512	2.17263	1.83781	2.04551	2.12682	2.07564	1.93314	2.05321	1.97795	1.94124	2.02755	2.02392	2.29179	2.06485	2.15234	2.31453	1.94591	1.86122	1.94759	2.11536	2.15744	2.12771	1.93951	2.05962	1.98174	2.00723	1.98302	1.93397	2.00359	1.86474	2.16395	1.9345	2.07203	2.04551	2.02426	1.82009	1.93951	2.0399	1.89387
TMEM190	4.2665	4.27118	4.05592	4.05344	4.33749	3.79044	4.30051	4.0556	4.05713	4.11811	4.17234	3.97834	4.12163	3.75664	4.31342	4.47884	4.24201	4.23407	4.55426	4.18401	4.17993	4.40612	4.28761	4.08586	4.04836	3.97984	4.16508	3.97804	4.02932	3.92113	4.16332	4.28665	4.37071	3.92884	3.91118	4.05976	4.71612	4.20717	4.30494	3.95836	4.09705	4.13649
GAS2L2	4.92656	5.05029	5.17548	4.93528	5.70309	4.92053	4.81059	4.88302	5.14301	4.9324	5.24144	4.74889	5.15653	5.32252	4.7224	5.50399	4.95457	5.12247	4.90523	4.79479	4.61422	5.1055	5.29021	5.10229	4.4756	4.91544	5.00428	4.98875	4.92834	4.8007	4.85365	5.28622	5.09459	4.67686	5.18484	4.71248	5.30534	4.85703	5.40124	4.69164	5.04475	4.76455
KCNG4	2.8598	2.61052	2.90574	2.67711	3.25182	2.34261	2.75256	2.9878	2.69044	2.95289	2.73177	2.63753	2.98366	2.91986	2.49897	2.88018	2.83753	2.79817	2.73828	2.79008	2.63641	3.17178	2.91637	2.72697	2.81248	3.08578	2.64928	2.92274	2.55067	2.65661	2.40535	2.99715	2.7781	2.52633	2.71863	2.74866	3.06664	2.82165	3.14963	2.71705	2.77172	2.86578
PXT1	2.38074	2.39933	2.2724	2.53201	2.46083	2.28811	2.548	2.46608	2.4432	2.30539	2.52046	2.43187	2.34544	2.30099	2.493	2.70558	2.63419	2.43174	2.53786	2.4861	2.16066	2.57965	2.59863	2.47116	2.40189	2.32077	2.58616	2.35447	2.39392	2.19362	2.42944	2.48278	2.28735	2.43242	2.78423	2.33756	2.23873	2.56493	2.82281	2.51079	2.31369	2.41448
CACNG5	3.96376	3.6838	4.24847	4.03354	4.4374	3.76937	3.82561	4.21665	3.89661	4.17875	3.99635	3.82651	4.14909	4.00781	3.6819	4.12826	4.06924	3.96516	3.85039	3.96303	3.73299	3.979	4.09031	4.11113	3.61376	3.97172	4.05387	3.95026	3.76155	3.76038	3.71083	4.13091	4.01324	4.04885	3.90289	4.02946	4.45143	3.77036	4.33494	3.8677	4.01324	3.80148
LINC00308	3.02493	3.13012	3.37815	3.26664	3.65235	3.02384	3.08757	2.94606	3.07816	3.20621	3.39492	2.79818	3.12692	3.09461	3.02811	3.19704	2.94274	3.16851	2.97348	3.02155	2.98118	3.09787	3.293	3.17876	2.78329	3.03602	3.0184	2.87432	2.77547	3.18565	2.90467	3.06224	3.0912	3.13281	3.04609	3.22414	3.15182	2.79976	3.28788	2.54862	3.35528	2.9353
WFDC11	3.28871	3.07783	3.09697	2.85335	3.32871	3.06346	3.07089	3.16117	3.057	3.13856	3.39658	2.97947	3.2973	3.28361	3.03937	3.1458	3.33559	3.16405	3.49993	3.04663	3.02001	3.16611	3.31876	3.15449	2.9037	2.89671	3.16153	3.10954	2.9325	3.26789	2.91044	3.27609	3.16816	2.92366	3.06263	2.99801	3.33227	2.98738	3.28883	3.06303	3.26479	3.14139
ACACB	6.32816	6.00806	6.1955	6.46228	6.85034	6.00102	6.04712	6.21113	6.11515	6.42957	6.40301	5.84559	6.36456	6.50816	5.78176	6.23181	6.38289	6.04846	6.15203	5.93261	6.20529	6.34929	6.84542	6.22608	5.82921	6.65532	6.25827	6.22845	6.04774	6.35036	5.91837	6.09654	6.48936	6.17319	6.1642	6.06319	6.43334	6.11408	6.49777	6.06102	6.38255	6.10992
SPRR4	5.25474	5.66696	5.31987	6.07227	6.17458	5.24372	5.49461	5.66038	5.58089	5.65105	5.75329	5.50085	6.01174	5.2184	5.46989	5.71528	5.81859	5.59735	5.6941	5.74305	5.40368	6.09765	6.24104	5.56918	5.5638	5.75003	5.61921	5.48101	5.47979	5.75635	5.2846	5.59283	5.9715	5.45074	5.74195	6.17067	5.58055	5.70455	6.22365	5.39848	5.75165	5.60693
HSH2D	4.0788	3.92945	4.45534	4.23262	4.46242	3.62102	4.11863	4.18151	4.26403	4.15124	3.77795	3.99927	4.06249	3.8721	3.95397	4.13624	4.29767	4.16254	4.33205	4.22064	3.82628	3.91457	3.89943	3.96581	3.75171	3.98343	4.26849	4.74976	3.9929	4.02972	4.09428	4.33287	4.2538	4.39266	4.01054	3.79707	3.89352	4.08654	4.08654	4.10372	4.41081	3.98651
TMEM163	5.01031	3.4306	3.94143	3.65132	3.90985	3.25845	3.48769	4.78777	3.73301	4.01611	3.63823	3.96065	3.72331	3.68751	4.49656	3.77178	3.80014	4.39627	3.24375	4.23389	3.41923	3.90222	3.6875	3.64779	3.83291	3.43976	5.20521	3.4973	3.39955	3.80653	3.64505	3.83902	3.54303	3.84195	3.81042	3.52753	3.47063	3.30119	3.567	3.99563	3.62102	3.49312
KLHDC7B	4.20832	4.19936	4.07429	3.8066	4.44193	3.63476	4.19085	4.20418	4.26615	4.23	4.45902	4.14667	4.0117	4.26222	3.95307	4.31277	4.01448	3.97408	4.29363	4.18206	3.9616	4.10711	4.16365	4.21579	3.86581	4.1759	3.7377	4.19772	4.16068	3.72511	4.05091	3.86973	3.6793	4.00494	3.79698	4.00027	4.10254	3.99702	3.97777	4.24535	3.98491	4.03767
TXNDC2	3.98308	3.81481	4.02371	4.38446	4.61415	3.97766	4.02936	4.05352	4.12846	4.14235	4.20774	3.75168	4.06843	4.32309	3.84892	3.90584	4.2627	4.05265	4.07559	4.14188	4.03241	4.19473	4.6296	3.99937	3.97219	4.11301	4.22918	4.06754	3.78707	4.07201	3.63876	4.22437	4.19531	3.94831	4.13318	4.02945	4.15602	3.91366	4.41658	3.66258	4.23486	4.01021
PCDHGB7	3.24199	3.30904	3.78348	3.25504	3.6234	3.47713	3.50255	3.58935	4.02404	3.32663	3.72152	3.49864	3.14937	3.42608	3.66865	3.63601	3.54294	3.53811	3.98413	3.64937	3.3998	3.53168	3.95241	3.6159	3.26995	3.4386	3.46351	3.35398	3.43566	3.49433	3.21283	3.61985	3.8591	3.34904	3.4614	3.49308	3.51356	3.48892	3.36863	3.54889	3.73623	3.37971
FLCN	5.10588	4.97049	5.35612	4.44048	4.89447	5.37602	5.25814	4.82816	5.24265	4.96462	4.63784	4.9421	4.1194	4.58973	4.81676	4.86502	4.75126	5.27413	5.17633	5.32391	5.24034	5.40518	4.94491	5.2284	5.28655	4.6915	4.92842	4.76696	4.67893	5.52696	5.09987	5.54102	3.9384	4.9641	5.38758	4.91531	5.1788	5.11856	3.08371	5.13758	3.37046	5.27257
JMJD1C-AS1	3.11879	3.19424	3.55902	3.31337	3.86629	3.35164	3.29221	3.39378	3.57515	3.1034	3.52711	3.95081	3.44648	3.49581	3.53215	3.90432	3.5416	3.60962	3.53904	3.50966	3.28525	3.78224	3.52139	3.59633	3.22272	3.46845	4.01396	3.26303	3.46533	3.02435	3.32954	2.95767	3.31562	3.05119	3.07026	3.25235	3.38306	3.34034	3.82094	3.01643	3.14355	3.33713
SLC9A7	3.29359	3.23426	3.35113	3.08729	3.6061	3.15061	3.20852	3.20041	3.62693	2.9474	3.1079	3.26248	2.9309	3.08382	3.05239	3.42437	3.31017	3.27816	3.18453	3.34075	3.28022	3.34596	3.05388	3.89639	2.99636	3.09741	3.49649	4.49822	3.88104	3.27709	2.93394	3.22226	3.34431	3.2876	3.41082	3.03082	3.38653	3.14166	3.32614	3.22461	3.27085	2.59208
RFX6	2.44461	2.11171	2.01459	2.52247	2.40671	1.87359	2.18484	2.2629	2.135	2.38482	2.2182	2.20055	2.16141	2.0738	3.59423	2.23465	2.1963	2.34497	1.86663	2.16042	1.89371	2.15647	2.18718	2.37306	2.38807	2.03465	2.17416	1.94503	2.12366	3.43834	2.03465	2.30658	2.4941	2.32004	2.16494	2.21304	1.93912	2.26249	2.64739	2.12913	2.37773	2.1205
DIRC1	2.03393	1.86797	1.94794	2.02054	2.10421	2.03664	2.06332	2.21132	2.07564	2.11507	2.06775	1.85995	2.18774	1.9867	1.94837	2.37285	2.18095	1.94794	1.99913	2.00789	2.12721	2.03206	2.14436	2.00359	1.91026	2.14168	2.0368	2.14617	1.89885	1.95562	1.91697	2.09724	2.12721	1.96663	2.30925	2.13655	2.01008	1.94179	2.42515	1.87255	2.10946	2.09607
DNAJB7	2.23218	2.00638	2.27163	2.22678	2.08501	2.09154	2.07716	1.93781	1.98032	2.06799	2.14238	1.94279	2.25751	2.06001	2.07886	2.21109	1.98112	2.16592	2.09212	1.87574	2.1896	2.19647	2.18438	2.18796	2.16706	2.11832	2.11694	1.98634	2.07727	2.09586	2.14389	2.00359	2.04868	2.0532	2.11553	2.12247	2.00875	1.89472	2.34949	1.84266	1.82383	2.04364
UCN3	4.40607	4.43043	4.33671	4.58501	4.99031	4.09154	4.60158	4.63894	4.40241	4.76442	4.75679	4.17478	4.67498	4.47688	4.49675	5.05228	4.96235	4.31016	4.25018	4.37053	4.13961	4.55266	4.93308	4.48667	4.17851	4.51194	4.65987	4.48304	4.41123	4.50503	4.0992	4.65639	4.46214	4.57502	4.42504	4.59891	4.3132	4.46522	4.77674	4.39829	4.39403	4.23395
CNBD2	3.47191	3.25819	3.77161	3.63734	3.91656	3.29314	3.42153	3.48955	3.55328	3.94874	3.45143	3.28003	3.57868	3.72612	3.31337	3.7022	3.59963	3.51627	3.66628	3.3933	3.6223	3.42262	4.45777	3.72127	3.38298	3.65785	3.37488	3.59963	3.4224	3.55639	3.34555	3.631	3.60908	3.50244	3.66929	3.40192	3.81869	3.27555	3.69768	3.31208	3.58825	3.6181
CASKIN1	4.42428	4.52285	4.28298	4.61456	4.6828	4.46806	4.62044	4.96358	4.78233	4.77641	4.77284	4.39709	4.77491	5.30509	4.72412	4.80505	4.5695	4.73018	4.70399	4.80707	4.41283	4.8781	4.96958	4.61059	4.57381	4.76652	4.97127	4.55763	4.67269	4.91646	4.84287	4.44444	4.58903	4.88499	4.56988	4.69265	4.20873	4.94426	4.6135	4.88899	4.43106	5.04088
ARL11	2.86265	4.56901	3.14405	3.03738	1.80869	2.09391	3.49454	2.07097	2.51567	2.10221	2.33832	2.85909	1.62691	2.20147	2.09238	2.27446	2.33056	2.45643	2.20836	3.71537	5.14118	2.34049	2.88831	2.64231	2.33291	2.03595	2.09607	1.97248	2.12197	2.02814	3.8912	2.39409	3.50265	4.1684	5.81473	2.38933	4.09658	3.99702	2.62142	2.3605	4.48978	2.12671
TUBA3FP	4.53112	4.68839	4.29783	4.49982	4.64615	4.9735	4.4309	4.42519	4.64671	4.61001	5.0897	3.9221	4.49982	4.61645	4.1773	4.43642	4.39622	4.19055	4.34578	4.47808	4.17013	4.46333	4.7705	4.5546	4.02192	4.59291	4.65857	4.43177	4.23281	4.24497	4.12932	4.38064	4.64085	4.44232	4.23155	4.50693	4.50653	4.38458	4.63801	4.46472	4.36007	4.39632
CARD16	7.95839	7.86548	8.43028	5.79934	8.32597	6.7674	7.68799	8.13388	8.2591	8.39827	7.98676	8.39915	6.90508	6.76061	6.54206	8.48299	7.66617	7.95646	7.19546	8.41041	6.57381	8.63792	8.54154	7.65981	6.94452	8.26304	7.2327	8.00418	6.71158	8.40658	7.39116	7.38765	7.03793	8.19293	7.34627	6.68987	7.76514	6.28635	7.45065	7.87846	6.38682	6.81999
CREG2	2.02669	2.25626	2.24632	2.27555	2.28373	2.19882	2.26403	2.23825	2.27992	2.22384	2.37556	2.25223	2.18353	2.1496	2.27986	2.29905	2.33507	2.21673	2.42024	2.15207	2.0121	2.32669	2.26784	2.77505	2.41413	2.22891	2.48009	2.1922	3.37842	2.32779	2.14389	2.20217	2.28427	2.25926	2.44829	2.3389	2.09886	2.48195	2.21248	2.27165	2.02241	2.26013
RHOXF1	3.60077	3.40963	3.83214	3.8734	3.98951	3.53	3.48962	3.78741	3.73255	3.14322	3.65135	3.45393	3.38337	3.69327	3.50881	3.6056	3.45693	3.48002	3.71818	3.37581	3.80664	3.61897	3.99363	3.74876	3.40756	3.54709	3.58584	3.55715	3.48194	3.47466	3.30549	3.53028	3.3799	3.66979	3.40575	3.60489	3.59378	3.2266	3.78791	3.13295	3.68537	3.6378
ADAMTS17	2.92077	2.81858	3.23851	2.51069	3.3307	2.61833	3.08881	3.04693	3.06475	2.86769	3.25692	2.76847	3.02968	3.31809	3.19702	3.11669	2.94389	2.89497	3.21026	2.95928	3.03877	3.01527	3.06096	3.14658	3.09708	3.03367	3.25128	2.78754	2.99591	2.75805	2.67345	2.82705	3.08881	3.00014	2.84049	2.89716	2.90634	2.83477	2.91114	2.86769	2.73546	2.64843
DHH	2.94842	3.0338	2.99733	3.34308	3.50913	2.79047	2.94455	3.31596	3.13456	3.02793	3.0365	3.2173	3.125	3.05474	3.11685	3.25012	3.01269	3.04422	2.98397	3.07434	2.97286	2.95224	3.826	2.94282	3.06486	3.20412	2.87295	2.86265	3.0283	2.82403	3.22521	2.59502	3.32749	3.10375	3.20078	2.86355	3.19945	2.86253	3.10027	2.94217	3.05719	3.04139
ABRA	2.46107	2.36721	2.79534	2.53233	2.92991	2.37017	2.09841	2.38465	2.40479	2.54862	2.51102	2.40253	2.54638	2.42614	2.39167	2.47266	2.30467	2.4543	2.52979	2.36374	2.35383	2.41426	2.63155	2.5238	2.29433	2.23131	2.40147	2.35678	2.3776	2.29393	2.34796	2.4448	2.42263	2.46645	2.41759	2.47121	2.93273	2.29997	2.21265	2.15327	2.47371	2.4945
KLHDC1	2.58093	2.35937	2.33652	2.49899	2.77097	2.83463	2.20567	2.5207	2.56373	2.4978	2.3205	2.67757	2.54271	2.5388	2.59231	2.38724	2.37222	2.78692	2.57647	2.90435	2.58965	2.76492	2.47137	2.57742	3.05264	3.08885	2.55843	2.34764	2.543	2.74373	2.53524	2.93247	2.66703	2.52212	2.67528	2.8862	2.46843	2.57932	2.66922	2.62031	2.63777	2.35718
C2orf15	3.10444	3.40904	3.67798	3.26737	2.92146	3.45807	3.51795	3.33713	3.10946	2.95656	3.13081	2.95509	3.09785	2.96333	3.22586	3.18345	2.99815	2.80456	3.33282	3.24777	3.85962	3.34054	2.94098	2.92177	2.66144	2.98217	3.22032	2.90303	3.07638	3.38454	3.32001	3.19424	3.15004	3.51558	3.45774	3.33858	3.17339	3.02134	2.43953	3.01789	3.46058	2.81808
KCNH8	3.13203	4.239	2.99035	3.49795	2.79737	3.78033	3.66772	2.60997	3.02453	3.54863	3.64936	2.57979	3.02968	2.95732	3.77944	2.42887	2.99328	2.675	2.63753	3.12468	5.13433	2.93673	3.86469	2.64353	3.43245	3.24024	2.83644	2.41676	2.98008	2.49229	3.57178	3.24928	3.95099	2.85374	3.09198	3.42918	3.66198	3.27628	4.35895	2.98737	3.45566	3.50061
SLCO6A1	2.55079	2.45747	2.67389	2.50863	2.60291	2.29692	2.37811	2.6329	2.27325	2.6236	2.45747	2.64618	2.63619	2.4807	2.52036	2.42121	2.46058	2.60227	2.55574	2.34154	2.55217	2.58624	2.70563	2.41505	2.38665	2.63298	2.36563	2.32414	2.61346	2.55119	2.28308	2.32581	2.68624	2.66301	2.52071	2.81253	2.2612	2.69496	2.50996	2.35794	2.75257	2.78388
PP2D1	2.1142	2.0471	2.18164	2.05409	2.02385	1.78919	1.90517	2.00232	2.16152	2.18389	2.29923	2.3325	2.0843	1.97714	1.90687	1.90958	2.06785	2.01145	2.04367	2.06673	1.98713	2.1206	2.10842	2.10068	2.05268	1.94781	2.09436	2.39066	1.91452	1.93464	2.07258	2.19384	2.08011	2.15531	2.16338	2.07503	2.02715	2.06877	2.20343	2.11887	2.00643	2.10817
KLC3	6.94374	6.67751	6.95366	7.07338	7.21761	6.52506	6.42143	6.77776	6.56717	6.96255	7.30507	6.40163	6.86411	7.31662	6.21083	7.00165	6.98651	6.99502	6.80072	6.49364	6.54783	6.83164	7.50643	6.76302	6.3707	7.17658	6.60328	6.58542	6.6195	6.7666	6.27548	6.80856	7.01029	6.57832	6.97759	6.81818	7.10624	6.49667	7.42535	6.22212	6.84312	6.5833
CIB3	3.73741	3.74974	3.87985	3.8724	3.76383	3.97015	3.77995	3.7367	3.92061	3.7938	4.11433	3.64647	3.66354	3.68565	3.74774	4.12726	3.89209	3.67036	3.70261	3.61861	3.49055	3.61401	3.66813	3.8636	3.34618	3.78146	3.7293	3.84581	3.58222	3.81307	3.45336	3.82705	3.71693	3.53426	3.90732	3.81076	3.95643	3.62339	3.98211	3.60981	3.88133	3.31678
CADM2	2.59275	2.59519	2.25075	2.52473	2.54554	2.25	2.28272	2.24798	2.40418	2.44676	2.42339	2.31934	2.92888	2.45312	2.2798	2.3847	2.62567	2.45787	2.56206	2.45699	2.39445	2.34104	2.5018	2.31072	2.46003	2.36536	2.29246	2.49668	2.35193	2.31386	2.34411	2.72135	2.48887	2.40195	2.46929	2.52205	2.62567	2.5006	2.42568	2.43433	2.3696	2.52387
DOCK8-AS1	2.52888	2.99904	2.62482	2.53921	2.82479	2.49416	2.57261	2.47331	2.58626	2.71882	2.61684	2.61333	2.60802	2.47661	2.91014	2.85762	2.41345	2.55406	2.70379	2.61191	2.365	3.09281	2.98152	2.4225	2.5603	2.65965	2.69824	2.79132	2.66884	2.50159	2.37241	2.81479	2.6797	2.42864	2.55129	2.7628	2.81411	2.41863	2.7325	2.61074	2.67467	2.37105
SLC16A11	5.09291	4.97646	5.40297	5.51388	5.37228	4.61701	4.86685	5.26457	5.28432	5.3883	5.50016	4.9025	5.30379	5.13047	4.94458	5.11801	5.25416	4.86512	5.0586	4.81071	4.95736	5.13884	5.48832	5.14922	4.96606	5.54696	5.14524	5.13118	4.96365	5.17443	4.64284	5.23603	5.42103	4.95002	5.10328	5.33163	5.4011	4.94846	4.96489	4.88552	5.05007	5.14243
HS6ST2	7.91445	8.51043	8.8428	7.06132	6.60782	5.32652	4.72288	7.71691	7.71818	2.71914	3.28922	4.15149	3.5885	7.59729	7.11321	7.39309	8.67894	7.64471	3.59298	7.40484	7.82154	6.9526	2.61154	2.50805	7.05149	5.73039	3.12116	8.62437	8.38518	6.86999	5.32826	7.0511	7.33755	8.70258	7.9684	5.90833	3.76799	8.9333	6.05265	7.40967	9.08671	2.98892
ZNF625	2.74037	2.63259	2.75645	2.42148	2.96779	2.44227	2.55918	2.58725	2.79995	2.73211	2.82287	2.30856	2.48236	2.56828	2.65954	2.56413	2.94115	2.53488	2.91194	2.67368	2.65692	2.89405	2.7576	2.65184	2.56744	2.85872	2.57853	2.63753	2.31896	2.64419	2.66674	2.74177	2.89541	2.74655	2.55988	2.7356	2.922	2.68256	3.02809	2.46334	2.85926	2.50105
ZNF563	3.28565	3.09387	2.94511	3.73047	2.75041	3.12814	2.95359	2.94864	2.96398	3.10008	2.90882	2.69337	3.22533	3.522	3.1851	2.80034	3.17816	2.77653	2.94175	3.02086	3.4228	3.09055	3.11734	2.73523	2.82736	3.31434	3.00785	2.80618	3.36948	3.06446	3.03694	3.67465	3.52987	2.83303	3.70356	3.38335	2.99503	3.17507	3.12116	2.74809	3.70038	3.54104
CLEC4D	2.98061	3.03789	2.72277	2.8333	2.93898	2.80845	2.54342	2.68518	2.59796	2.94572	2.49698	2.74972	2.60763	2.62516	2.74408	2.5566	2.74979	2.70589	2.7341	2.82753	2.62936	2.71717	2.91112	2.6217	3.07478	2.66052	2.87961	2.48422	2.62896	2.50048	2.57863	2.91357	2.68117	2.92578	2.50255	2.72648	2.56983	2.84844	3.0399	2.67669	2.87239	2.32819
GPRC6A	3.45173	3.43426	3.57801	3.9061	3.76605	2.96686	3.25005	3.29366	3.17309	3.76907	3.71488	3.31455	3.07448	3.30231	3.59595	3.49584	3.33877	3.04946	3.67588	3.36993	3.21933	3.58842	3.54304	3.27249	3.2556	3.69346	3.48663	3.56995	3.32962	3.36868	3.13497	3.53294	3.76445	3.33416	3.69864	3.69682	3.25985	3.16478	3.8451	3.34098	3.72385	3.25733
RAET1E	2.71491	2.69098	2.81085	2.82874	3.01638	2.3664	2.47238	2.70063	2.57386	2.85616	2.89515	2.76966	2.69321	2.69718	2.67188	2.78314	2.73608	2.78683	2.65237	2.63926	2.56413	2.57063	3.02259	2.64596	2.40707	2.66052	2.5351	2.73211	2.45339	2.52263	2.82874	2.51567	2.71316	2.68641	2.58993	2.6866	2.52118	2.52444	2.61975	2.50832	2.73083	2.86972
ZNF417	1.98041	1.79817	1.95748	1.71114	2.02573	1.90988	1.95555	1.90854	2.00622	1.97728	2.04715	1.99362	1.92745	1.99369	1.97357	2.12724	1.89767	1.94272	2.07428	1.86369	2.02256	2.04862	2.02675	1.799	1.96016	2.2891	1.91272	2.10942	1.98302	1.9927	2.04321	1.85397	2.05677	1.9165	2.11592	1.944	1.79232	1.87368	2.21098	1.9013	1.87828	2.15997
ZNF781	2.17076	2.04665	2.17253	2.00014	2.29857	2.14084	2.01782	2.13288	2.27115	2.15189	2.16503	2.17655	2.26454	2.28715	2.08094	2.25365	2.15123	2.30344	2.2329	2.09746	1.97765	2.23387	2.14387	2.1931	2.26024	2.15248	2.15675	2.0424	2.08898	2.03794	2.11213	2.2945	2.25193	2.10885	2.18533	2.22886	2.29176	2.28905	2.13844	2.20228	2.16395	2.02728
HELB	3.28529	3.58382	3.696	3.40936	4.07977	3.80851	3.20392	3.57561	3.27152	3.47124	3.82003	3.68322	3.63696	3.66305	3.43426	3.40942	3.73271	3.60495	3.14675	3.31896	3.5459	3.72588	3.76666	3.27403	3.18882	3.54709	3.48327	3.47685	3.45336	3.69396	3.48626	3.47972	3.49294	3.24371	3.59973	3.21623	3.6137	3.43472	3.49655	3.24352	3.33433	3.69492
C8orf31	2.68464	2.73922	3.07293	2.58828	3.11509	2.77569	2.41286	2.70347	2.85848	2.71197	2.47059	2.86098	2.7452	2.65823	2.63753	2.977	2.99778	2.71452	2.63753	2.788	2.43965	2.87747	2.84974	2.79458	2.86479	2.75893	2.59825	2.57919	2.63175	2.86531	2.55574	2.89665	3.12379	2.932	2.61693	2.84287	2.7319	2.62685	2.51901	2.67415	3.07693	2.46354
TLR4	4.18834	4.10689	4.19686	3.46371	3.87225	4.00867	4.15778	4.08431	4.39952	5.28799	3.74266	4.90537	4.0123	3.92427	3.75189	3.9836	3.55956	4.05158	4.18396	5.21646	3.65813	4.81725	3.62315	4.46667	5.0339	4.52739	4.37359	3.63785	4.42144	4.63337	4.33681	5.48567	3.22423	4.14636	3.42803	4.34405	4.18151	3.46776	3.90293	4.42536	4.13901	4.35492
SIGLEC10	7.07477	4.94425	6.38107	5.63284	5.11156	4.99769	5.41626	4.81297	5.91711	6.45028	4.77109	6.45211	4.73902	5.26634	4.18738	5.3161	4.79303	6.13039	4.46045	5.81773	4.76219	5.57847	4.48515	5.81486	6.21499	5.48859	5.14839	5.17736	5.25145	4.48515	5.64441	5.06878	5.33789	5.64206	5.12361	4.94378	5.59906	4.6317	4.69978	5.37999	4.72842	4.68285
RFX4	2.20005	2.17767	2.39939	2.48883	2.62372	2.3893	2.38519	2.39164	2.27957	2.55948	2.27927	2.21487	2.50565	2.56586	2.28098	2.28882	2.1853	2.20938	2.38059	2.40454	2.02683	2.23376	2.26741	2.50494	2.19093	2.63483	2.2252	2.28225	2.41956	2.33931	2.4909	2.51834	2.36999	2.31495	2.60786	2.35563	2.22527	2.31012	2.54849	2.29828	2.28958	2.44184
WFIKKN1	4.71721	4.51046	4.61887	4.87194	4.99609	4.57049	4.70302	4.81005	4.6157	4.63021	5.09795	4.60508	4.69283	4.52018	4.42309	4.96591	4.69129	4.73812	4.67138	4.62578	4.46463	4.72682	4.78012	4.88274	4.76197	5.09913	4.65466	4.67698	4.61887	4.77392	4.50398	4.61938	4.61373	4.74572	4.54382	4.91174	4.80233	4.63683	4.94568	4.48907	4.71603	4.56439
KLF14	3.18766	3.7088	3.34549	3.34308	4.13646	3.18766	3.20764	3.37363	3.20628	3.33853	3.58393	3.16918	3.20649	3.42379	3.30933	3.60231	3.65246	3.35009	3.77884	3.35926	3.25569	3.22669	3.70162	3.25572	2.85569	3.45308	3.23102	3.05268	3.16387	3.16387	3.31922	3.25393	3.38555	3.12077	3.29048	3.32658	3.65286	3.27286	3.48603	3.22614	3.36538	3.34448
NXNL2	1.87035	2.22367	1.93513	2.50243	2.12381	2.12769	1.99144	2.09917	2.11317	1.95221	2.00432	2.03247	1.87659	2.00316	2.31548	2.39432	2.23311	1.99243	2.13187	1.98236	2.07743	2.05182	2.13816	2.05075	2.24011	2.10756	1.91327	1.83004	2.04949	2.0555	1.83061	1.85261	1.95074	1.87183	1.97642	2.11479	2.02976	1.86273	2.08411	1.9061	2.17921	2.08877
SLC26A7	2.23669	2.2238	2.33245	2.44484	2.44889	2.33214	2.2893	2.7643	2.41827	2.57012	2.34043	2.61934	2.35854	2.27892	2.29456	2.54087	2.4909	2.62143	2.50487	2.33322	2.25841	2.72457	2.35829	2.41529	2.32311	2.81876	2.3949	2.38071	2.40262	2.41814	2.1918	2.51727	2.62326	2.43357	2.53057	2.55758	2.28243	2.20627	2.54816	2.40986	2.77705	2.5918
FBXO39	2.54801	2.60941	2.4119	2.80389	3.11962	2.46966	2.51681	2.65616	2.35385	2.83217	2.60375	2.73241	2.72656	2.63343	2.62551	2.69718	2.76154	2.61911	2.59283	2.56373	2.62284	2.44462	3.06123	2.52602	2.6276	2.7898	2.49096	2.44311	2.5311	2.58033	2.38311	2.94472	2.58534	2.75229	2.591	2.55794	2.63197	2.49563	2.59053	2.51919	2.52511	2.43247
B3GNT6	4.6142	4.0801	4.12536	4.72931	5.0864	3.83768	3.84026	4.58704	4.53466	4.62469	5.23126	3.77019	4.07406	4.53147	8.3964	5.63904	4.93405	4.82129	4.32059	6.22329	3.92592	4.90027	4.11333	4.58351	3.98522	7.56242	3.9803	3.93519	4.02822	3.6353	3.77019	3.68952	3.88866	5.50203	3.72584	4.05913	4.2629	3.59413	4.89372	4.23908	4.34517	4.2266
ZNF619	4.48692	4.59787	4.05533	5.20843	4.77533	4.74463	4.25953	4.50932	4.28787	4.82343	4.56439	4.90099	4.44355	4.04109	4.7164	4.53193	4.3647	4.71291	4.84823	4.85815	5.01491	4.87162	5.03213	4.52639	4.59461	4.48912	4.15078	4.52905	4.52942	4.32322	4.40817	4.80638	4.50146	4.3658	4.78717	4.48026	4.02408	4.59814	4.22698	5.13985	4.25528	4.46503
FAM71D	2.65653	2.6366	2.63183	2.94598	3.03438	2.55519	2.58027	2.64897	2.59173	2.8584	2.8851	2.3939	2.85416	2.83505	2.51901	2.87703	2.95514	2.89497	2.74588	2.68072	2.4493	2.94691	3.03438	2.7262	2.42119	2.81463	2.72639	2.56373	2.74195	2.70177	2.55307	2.78357	2.84997	2.53761	2.74581	2.86033	2.8293	2.71668	2.80069	2.6015	2.74339	2.91576
RAB42	4.98299	4.58116	5.48079	4.91535	5.35065	4.58988	4.64615	4.75088	4.95271	5.18326	5.17004	5.04138	4.70515	4.88879	4.61595	4.71118	5.0336	4.85022	4.85548	5.01038	4.47646	5.46982	5.14125	5.07248	5.16967	4.87541	4.66781	4.75907	5.06047	4.80639	4.66567	4.78553	4.90109	4.97105	4.9528	4.69908	5.01511	4.66262	4.76886	5.68583	4.81968	4.45758
PTCHD1	2.56184	2.2472	2.58796	2.66939	2.64552	2.2676	2.38755	2.64449	2.43744	2.56387	2.71087	2.35233	2.67728	2.52479	2.69945	2.80646	2.41086	2.51345	2.5684	2.54129	2.54637	3.13886	2.52251	2.39381	2.91739	2.55572	2.2713	2.48415	2.5002	2.43584	2.70155	2.66575	2.88074	2.85042	2.95452	2.52353	2.59656	2.503	2.66512	2.48945	2.42073	2.74585
ZSCAN4	2.09042	2.26936	2.44221	2.17295	2.60552	2.34969	1.98484	2.28477	2.25599	2.28206	2.42427	2.08749	2.68769	2.2134	2.26059	2.31823	2.83402	2.19997	2.20907	2.35313	1.86063	2.44069	2.29839	2.25975	2.32916	2.16391	2.64764	2.20618	2.1741	2.22285	2.16499	2.43531	2.39542	2.72404	2.40967	2.22324	2.28526	2.23596	2.02664	2.24456	2.26212	2.23619
VWA5B1	3.15114	3.36261	2.92995	3.04202	3.59628	3.12436	2.83409	3.14819	3.09549	3.14176	3.28058	3.16973	3.14517	3.40618	3.15264	3.31249	3.3415	3.15952	3.17661	3.12507	3.00029	3.09594	4.02617	3.14031	3.04848	2.94435	3.03871	3.33858	3.00546	3.00137	2.94168	3.29557	3.10653	3.29911	3.14495	2.95186	3.12052	2.93327	3.28211	3.20932	3.28465	3.0107
LINC00311	2.9403	2.92879	2.55187	2.30356	3.49089	2.45066	2.60844	2.8851	2.7797	2.7516	2.90717	2.57989	2.84365	2.77152	2.75429	2.89118	2.76986	2.72684	3.1428	2.7334	2.77574	2.76721	3.15219	2.72788	2.75748	2.8027	2.91579	2.73313	2.65066	2.63644	2.4391	2.9658	2.95981	2.69422	2.84731	2.7797	3.09886	2.77008	2.78864	2.78897	2.77476	2.62086
MAGEB6	1.97003	1.91058	2.01381	1.96871	1.83214	1.85322	2.09584	1.92079	1.79157	1.84004	1.87926	1.78481	1.93188	1.78343	2.1082	2.00882	1.86919	1.76176	1.85428	1.85757	1.96757	1.75926	2.05703	1.92156	1.68097	2	1.97293	2.01129	1.92123	1.89184	1.92021	1.78013	1.90303	2.03077	1.91486	1.98172	1.71495	1.94031	1.95128	2.03838	2.10343	1.92355
CACNG6	5.56526	5.54741	5.52052	6.12055	6.12959	5.50397	5.40441	5.8523	5.5416	5.68615	6.18032	5.5125	5.84532	5.92451	5.49112	5.87907	5.80807	5.80049	5.69005	5.653	5.43511	5.9092	6.49169	5.82821	5.48843	5.90806	5.74901	5.36094	5.44442	5.68065	5.55329	5.76718	6.11271	5.76546	6.01754	5.79737	5.79918	5.67292	6.30675	5.4565	5.71045	5.66273
LMNTD1	3.7858	3.75547	3.73759	3.56555	4.13775	3.57018	4.24243	3.77193	3.43084	3.7049	3.72421	3.46434	4.37763	3.64563	3.51341	3.76979	3.77395	3.78775	3.90771	3.78826	3.62029	4.41796	4.02572	3.47466	3.345	3.65304	3.80707	3.95026	3.59264	3.53561	3.5319	3.46198	4.36923	3.90153	3.80293	3.92205	3.81136	3.86015	3.72047	3.83434	3.87274	4.03303
CIRBP-AS1	4.36248	4.53185	4.81581	4.32415	4.84674	4.24672	4.01896	4.31857	4.32622	4.45854	4.22221	4.00677	4.51313	4.58208	4.21055	4.37421	4.50647	4.3417	4.25254	4.35433	4.08406	3.8968	4.30345	4.4576	3.91039	4.33804	4.17512	4.2857	4.43429	4.09274	3.96471	4.02872	4.2266	4.34719	4.05823	4.21331	4.36441	4.3011	4.64185	4.15232	4.32072	3.88764
AXDND1	2.6404	2.32322	6.2258	2.26049	3.91272	2.65649	2.88307	4.90413	4.44116	3.33055	2.73555	2.22657	2.55308	2.48122	2.66527	6.07546	3.61905	2.52502	2.47816	2.32233	2.86562	2.66079	5.77609	2.42033	2.07684	2.4301	5.20469	2.37457	2.21034	2.84708	5.85271	2.48254	2.78272	6.28979	6.51441	2.26966	2.25003	2.57581	6.96135	2.7215	5.78154	4.9748
ATOH7	2.28201	2.43688	2.99505	2.61658	2.53874	2.37538	2.28717	2.47973	2.33476	2.42341	2.50261	2.22577	2.73116	2.51549	2.26966	2.72282	2.4613	2.64207	2.49635	2.64217	2.63248	2.35452	2.36161	2.21113	2.26356	2.49357	2.35691	2.66068	2.4435	2.86132	2.65269	2.48302	2.62596	2.58341	2.61693	2.57038	2.3497	2.73281	2.80098	2.3908	2.42517	2.4458
AMER1	2.99731	2.86377	3.04346	3.04313	2.97869	2.89011	2.78775	3.15026	2.8777	3.11087	3.38779	2.93491	3.03998	3.43438	3.11693	2.58075	3.34006	2.99227	2.93139	2.93079	3.21456	3.21371	3.13028	3.04938	2.75755	3.13028	3.02076	2.98024	2.87871	3.03971	3.08566	3.14858	2.9697	3.08629	3.01786	2.70258	2.98255	3.07017	3.22726	2.89959	3.20798	2.73707
NKX6-3	5.34388	5.57044	5.35276	5.78173	5.96958	5.44227	5.64756	5.51453	5.42127	5.4175	5.66315	5.31776	5.48532	5.95501	5.12745	5.61291	5.51445	5.56711	5.3615	5.75236	5.38013	5.69882	5.57081	5.49336	5.5163	5.43017	5.32223	5.2847	5.24785	5.3197	5.20453	5.47077	5.71596	5.40551	5.64272	5.55859	5.62996	5.35195	5.84682	5.44544	5.60264	5.57367
TBATA	3.93113	4.08067	3.95251	3.98938	4.15912	3.71738	3.96656	4.04424	4.05643	4.24676	4.35952	3.81773	4.09692	4.15577	3.82728	4.1432	4.37762	3.9527	3.84993	3.98296	4.02422	3.98316	4.02179	3.88826	3.79602	4.17565	3.69749	3.98514	3.88918	3.79177	3.79089	4.0975	4.03393	3.75714	4.11853	4.05448	3.96707	3.7786	4.19269	3.59024	3.99132	4.00183
EXOC3L2	6.65916	6.70772	6.75435	6.84375	7.15433	6.49843	6.95211	6.73324	6.87217	6.83596	7.02609	6.54839	6.58027	6.9495	6.25493	6.81144	7.02632	7.00454	6.57165	6.51606	6.43778	6.86903	7.22885	6.75332	6.48773	7.1577	6.66651	6.75326	6.7485	6.6611	6.3025	6.997	7.05257	6.88583	7.07517	6.80827	7.03126	6.66431	7.33073	6.35511	6.86156	6.83022
TNFRSF13C	4.25779	4.29824	4.52683	3.92889	4.58481	3.69152	4.01467	3.91826	4.64797	4.32268	4.28018	3.76861	4.10979	4.25983	3.81626	4.30883	4.37122	4.04237	4.42932	3.84086	3.87395	4.44038	4.24799	3.99207	3.75076	4.32174	3.85888	3.91555	3.77572	3.94643	4.00881	4.13404	3.98868	3.67391	4.08131	4.07036	4.36559	3.83709	4.50364	3.65562	3.85601	4.05769
CAMK2N2	4.32426	4.31015	4.46746	4.51205	4.74891	4.22316	4.26504	4.47684	4.38858	4.48787	4.61423	4.07949	4.61544	4.90968	4.24918	4.87985	4.30555	4.30439	4.4356	4.35697	4.15174	4.54999	4.73203	4.41755	4.21837	4.30144	4.28732	4.15759	4.35726	4.25453	4.08444	4.49609	4.40292	4.51008	4.42383	4.48259	4.69436	4.59649	5.14575	4.09094	4.48376	4.49163
ANKRD30BP2	2.02548	2.22171	2.35313	2.20892	2.37508	1.87622	2.2943	2.08543	2.08501	2.55292	2.22706	2.16947	2.27297	2.16828	2.01858	2.32184	2.56416	2.05927	2.39141	2.20738	2.17208	2.1845	2.21642	2.30173	2.39198	2.32722	2.40231	2.36241	2.28211	2.14639	2.18721	2.17683	2.17528	1.95999	2.41529	2.17425	2.10252	2.31593	2.16377	2.07898	2.41783	2.11929
KCNG3	2.08844	2.40186	2.82929	2.71513	2.34667	2.32963	2.46115	2.53427	2.66457	2.5415	2.50316	2.51359	2.45974	2.49127	2.35238	2.63254	2.63636	2.46211	2.27544	2.42706	2.65615	2.64123	2.57759	2.60685	2.14957	2.4728	2.51546	2.26202	2.45474	2.43688	2.49975	2.46766	2.7522	2.47771	2.60015	2.52214	2.46013	2.46326	2.44481	2.34314	2.60208	2.42489
LINC01312	2.32175	1.81935	2.36227	2.12014	2.35016	2.11311	1.8283	2.55574	2.23128	2.40172	2.29668	2.08814	2.12336	2.46233	1.87453	2.20311	1.86414	2.33981	2.19766	2.15219	2.0399	2.43785	2.25855	2.10453	1.88468	2.27464	2.38134	2.08692	2.34191	2.18475	1.88218	1.90166	2.23884	2.16395	1.96583	1.90893	2.18323	2.06675	2.31777	1.95229	2.11889	1.98455
B4GALNT2	2.71088	2.95229	2.954	2.79507	3.58293	2.53949	3.01737	2.8851	2.98097	3.02298	3.09671	2.84922	3.02968	3.09251	3.6115	3.27974	3.06039	2.96814	2.92259	3.08805	2.73969	3.15264	2.97986	2.94048	2.72309	3.38911	2.97995	3.00633	2.69571	2.81775	2.57684	3.11256	2.72563	2.92261	2.90865	2.62299	3.15232	2.88765	2.82865	2.58036	2.98615	2.84749
FMR1NB	2.37165	2.06454	1.8245	1.96666	2.07378	1.88477	2.0399	2.38946	2.23989	2.17936	2.14859	1.94869	1.92853	2.35657	2.21613	2.07055	2.03541	1.92906	1.90988	1.89748	1.79861	1.91635	2.02556	2.03056	1.91733	1.97012	2.03671	2.18101	2.1771	2.15735	1.91229	1.82094	1.96496	1.99623	2.05387	1.88732	2.07899	1.99914	1.90988	2.03652	1.99985	2.04599
GCSAML	2.32514	2.41071	2.44395	2.6813	2.3938	2.33409	2.23957	2.23621	2.25293	2.43087	2.22271	2.39683	2.00439	2.31124	2.27035	2.36732	2.01024	2.34546	2.14625	2.40421	2.1786	2.26805	2.31629	2.35305	2.36309	2.22541	2.26267	2.2441	2.17977	2.50146	2.06369	2.19671	2.15242	2.13148	2.33277	2.20531	2.38452	2.31895	2.2397	2.28891	2.33981	2.17538
SIGLEC11	3.95974	3.78345	3.64983	3.59984	3.77596	3.6367	3.83297	3.59213	4.01088	3.83289	3.53041	3.55989	3.69541	4.10762	3.29195	3.9329	3.44138	3.5085	3.81019	4.09803	3.63419	3.47404	3.86997	3.77863	3.50758	3.77124	3.71835	3.63088	3.61192	3.52862	3.59648	3.71309	3.45421	3.44389	3.68485	3.38872	3.9452	3.47716	3.42513	3.54305	3.45833	3.64336
MAGEB18	2.02215	1.96174	2.01386	1.92335	1.95506	1.80212	2.16412	2.01818	2.29605	1.92798	1.91818	1.95437	2.14021	1.99285	1.89866	1.85971	2.00123	2.02283	1.94351	1.96312	2.00065	1.88422	1.86236	1.96349	1.92091	1.9549	1.95009	2.03879	1.91385	1.94221	1.77783	1.87492	1.82504	1.8283	1.93274	1.79932	1.84319	1.83016	1.93831	1.98574	1.9176	1.88089
IFNL2	2.74893	2.84365	2.7133	2.84769	3.45336	2.54573	2.84664	2.98283	2.93935	2.98751	3.01188	2.78563	3.11437	3.27851	3.02088	3.06517	2.98443	2.92342	2.91242	2.71175	2.78716	3.19062	3.40819	2.87991	2.76068	3.07209	2.84365	3.10282	2.56768	2.7666	2.60969	3.27051	3.36024	2.65302	3.10895	2.61128	3.06599	3.06531	3.5846	2.81271	3.05059	2.71551
IFNL1	3.45054	3.14141	3.71596	3.46824	3.85513	3.08033	3.59019	3.40947	3.26416	3.76694	3.82383	3.56933	3.51169	3.50888	3.32307	3.48367	3.34405	3.42799	3.43435	3.33601	3.4169	3.75998	3.7738	3.52507	3.26651	3.77591	3.29911	3.53475	3.36074	3.494	3.35209	3.47227	3.55488	3.40136	3.53475	3.49031	3.90328	3.5814	3.96168	3.19856	3.74946	3.57767
C4orf36	2.37386	2.48598	2.43115	2.40031	3.01536	2.23573	2.26971	2.53185	2.57756	2.63501	2.78297	2.5892	2.66717	2.27104	2.37924	2.29088	2.36534	2.52912	2.94833	2.35995	2.52967	2.19113	2.69183	2.4749	2.5992	2.52454	2.88812	2.62726	2.55774	2.3209	2.35979	2.30342	2.24781	2.17358	2.1426	2.31163	2.73817	2.23882	2.2339	2.35128	2.37877	2.50941
PCDH10	2.88858	2.81114	3.05296	2.95411	3.08871	2.92955	2.88171	3.03009	3.10693	2.74898	2.87031	2.90162	3.08095	3.27615	2.64964	3.09183	2.79357	2.84034	2.99244	2.95772	2.91975	3.01125	3.36997	2.94829	2.91365	3.3415	2.93701	3.05228	2.88324	2.86335	2.98411	3.30147	3.0739	3.12073	3.24153	2.76833	2.98803	3.15683	2.93257	2.86127	2.95389	3.06667
GRK7	2.25567	2.45895	2.66853	2.26601	2.14819	2.19339	2.34226	2.22002	2.2819	2.25672	2.30629	2.1787	2.58587	2.37654	2.4965	2.36366	2.38272	2.09854	2.20978	2.30098	2.17397	2.19244	3.05579	2.52778	2.02736	2.19785	2.30042	2.37276	2.58787	2.39011	2.11129	2.32359	2.2328	2.57479	2.46377	2.35457	2.30642	2.3994	2.28719	2.57896	2.26919	2.58493
MMEL1	5.02703	5.35242	5.46271	6.10452	5.58078	5.06082	5.43272	5.19418	5.01021	5.97164	6.31091	4.57962	6.27921	6.66108	5.31411	5.89324	5.48729	5.6178	5.48018	5.01858	5.94133	5.30201	6.08058	5.28494	4.80552	5.146	6.29354	5.47899	4.74593	5.15265	5.34767	6.10885	5.63005	5.83381	6.29914	4.69265	5.51508	5.75285	5.53671	5.86554	6.61378	5.14455
NLRP6	2.77539	2.93205	3.04065	3.16888	3.24408	2.87132	2.99708	3.13501	2.80277	3.06864	2.94073	2.83552	2.7695	3.2472	2.63898	2.9065	2.87225	2.80648	2.80966	2.86471	2.69704	2.76192	3.44893	2.90853	2.78689	2.97247	2.85512	2.9882	3.65576	2.96996	2.61537	2.96936	2.42344	2.78315	2.64682	2.73127	2.98718	2.70966	2.74779	2.59013	2.70306	2.82884
RTL3	4.10829	4.22706	4.13274	4.07404	3.92266	3.99281	4.00303	3.93537	4.03069	4.01007	4.2417	3.97992	4.43357	3.89011	3.85653	3.88544	4.21929	3.85331	3.87213	4.3948	3.66988	4.24221	4.46051	4.04838	3.72975	3.88681	4.00039	3.98836	3.99817	3.91616	3.68455	3.98343	4.23121	4.10654	4.2463	4.09807	4.27849	4.34525	3.82936	4.14457	3.55128	4.02528
ZIC5	3.50565	3.40335	3.1867	3.18099	3.71121	3.38452	3.36767	3.18772	3.43201	3.32688	3.44619	3.32836	3.29392	3.42132	3.42218	3.39249	3.10511	3.03315	3.25718	2.97694	3.46061	3.15489	3.68559	3.84536	3.68331	3.38041	3.35176	2.99317	3.58146	3.44643	3.25693	3.65445	3.2981	3.17257	3.30507	3.36936	3.46616	2.98888	3.59425	3.14875	3.34705	3.58051
TEDDM1	2.46522	2.53232	2.43068	2.56712	3.10467	2.44572	2.31842	2.55574	2.5697	2.81299	2.67946	2.31343	2.48887	2.47238	2.63979	2.61846	2.82038	2.42713	2.73065	2.43431	2.38374	2.54605	2.85379	2.50891	2.4376	2.72298	2.51041	2.62339	2.40761	2.46384	2.30645	2.58634	2.96599	2.26095	2.94	2.55129	2.55234	2.55305	2.71402	2.66079	2.47891	2.30702
LOC149373	3.55289	3.5666	3.8536	3.49084	4.19252	3.4713	3.55365	3.78366	3.42077	3.39737	3.83865	3.66575	3.87281	3.68928	3.59691	3.81171	3.82749	3.72335	4.06876	3.78099	3.51421	3.87052	3.85381	3.5726	3.39923	3.99367	3.53066	3.45824	3.4829	3.42694	3.46566	3.65256	3.92045	3.81857	3.72683	3.71639	3.28217	3.58623	3.7786	3.51933	3.83738	3.67564
PANX2	6.88833	6.71288	6.72857	6.75802	7.53188	6.68966	6.77989	6.87651	6.85769	6.91943	6.72218	6.79629	6.80205	6.7067	6.50275	6.95806	6.72089	6.73405	6.59664	6.76448	6.64141	6.90121	6.9225	6.88568	6.40432	6.77195	6.92636	6.67817	6.4118	6.67175	6.52238	6.95311	6.88489	6.77881	6.75399	6.77038	7.22904	6.84001	7.07311	6.5408	6.76596	6.5526
ZNF114	2.8686	2.90563	2.64305	3.55251	3.01415	2.61345	3.05525	2.73862	2.63887	2.9144	2.81287	3.31364	2.72133	3.10312	3.2776	2.62215	2.87044	2.68033	2.8423	2.64421	2.93304	2.71857	2.99282	2.82283	2.49908	2.86989	3.12057	2.72651	3.0463	3.48134	2.66052	2.78534	3.11756	2.45893	2.75937	2.75682	2.88296	3.1847	2.93704	3.17625	2.79459	2.49657
CCDC27	4.13797	4.13714	3.97841	4.06796	4.70329	3.96882	4.26208	4.29694	4.49719	4.04048	4.22438	3.74277	4.14909	4.29822	4.10791	4.1908	4.11059	3.94831	4.3355	4.25612	3.9644	3.60459	4.40381	3.94793	4.14741	4.03067	3.94287	3.77406	4.49215	4.30942	4.23063	4.01923	3.76464	4.23464	3.84258	3.996	4.03177	4.14057	4.31261	4.03036	4.28168	4.05898
CFAP161	2.14559	1.96619	1.81569	2.39263	2.13939	2.09741	2.26166	2.12422	2.11853	2.36696	2.35013	2.14469	2.31864	2.62921	2.23152	2.21023	2.25576	2.53736	2.23788	2.01105	1.90345	2.17135	2.1688	2.0743	2.06943	2.05596	1.91326	2.2541	1.94254	2.08759	2.1041	2.06527	2.15851	2.21135	2.20429	2.12917	2.03465	2.045	2.48881	1.87287	2.17749	2.00359
NEUROD2	3.23355	3.37311	3.2882	3.1842	3.27283	3.2408	3.32321	3.21164	3.36753	3.10971	4.00547	2.89175	3.10731	3.04735	3.27023	3.39453	3.20421	3.09743	3.39516	3.26231	3.14751	3.39993	3.36213	3.5109	2.83461	3.23606	3.25319	3.19962	3.14926	3.20216	3.20788	3.19568	3.31863	2.72713	2.95783	3.16651	3.46455	3.0679	3.56417	2.83249	3.34238	2.89693
C5orf17	2.47653	2.32833	2.521	2.96297	2.81042	2.19439	2.43725	2.90777	2.77478	2.6743	2.74386	2.41538	2.53976	2.48696	2.78193	2.57079	2.78974	2.49562	2.60107	2.49087	2.45151	2.4535	2.60145	2.41958	2.32579	2.41108	2.81364	2.35479	2.40062	2.59749	2.569	2.74927	2.53833	2.64052	2.36589	2.49233	2.60994	5.67486	2.40374	2.67566	2.46624	2.37538
LINC00208	2.80706	2.87974	3.11038	3.01851	3.18557	2.50665	2.61487	2.85122	2.82135	2.97747	3.03847	2.62337	2.93683	2.95797	2.73232	3.12458	3.13028	2.75901	2.68804	2.74635	2.80361	3.01593	3.1193	2.8142	2.67454	3.09533	2.86879	2.71105	2.8279	2.78082	2.63364	2.48022	3.22423	2.68744	2.81933	2.56663	2.9794	2.92026	2.97697	2.66551	2.99274	2.91296
CFAP46	3.49888	3.39039	3.82289	3.49731	3.88478	3.10838	3.6734	3.63859	3.66929	3.6118	3.43092	3.61071	3.45908	3.33502	3.56166	4.05855	3.39794	3.29644	3.47737	3.26691	3.56527	3.55256	3.78314	3.47466	3.6659	3.67794	3.38764	3.35167	3.43992	3.59812	3.27812	3.75214	3.75727	3.49774	3.78336	3.42543	3.74145	3.35218	3.76988	3.68893	3.60471	3.70596
CBLL2	3.2713	3.37675	3.1773	3.22092	3.86096	3.212	3.09497	3.27642	3.14242	3.52763	3.27325	2.96135	3.415	3.68162	2.98232	3.58367	3.59175	3.3929	3.30879	3.15569	3.19656	3.47927	3.27269	3.22001	3.22889	3.6406	3.47717	3.15919	3.15383	3.29118	3.10662	3.26092	3.22907	3.531	3.67381	3.24475	3.17637	3.32651	3.77051	3.03848	3.62102	3.42555
SGCZ	2.37159	2.33371	2.64813	2.38472	2.42192	2.09534	2.26747	2.52293	2.41528	2.26328	2.23042	2.34961	2.42984	2.3461	2.3919	2.36315	2.3263	2.09172	2.28172	2.01356	2.14389	2.14116	2.44248	2.11414	2.14864	2.61344	2.42341	2.3412	2.14791	2.41038	2.06726	2.57243	2.36346	2.26642	2.28989	2.36788	2.29129	2.06088	2.30967	2.12653	2.37673	2.20565
LINC02551	1.99517	1.82877	1.88372	1.84865	2.04536	1.85562	2.0353	1.90101	1.94965	2.11521	1.9606	1.70482	1.93522	1.95286	2.12322	1.93575	1.97387	2.14716	1.87674	1.86006	1.9111	2.03834	1.91358	1.84321	1.88054	1.80001	2.1034	1.83663	1.8205	1.88773	2.03465	1.93703	2.0111	1.91934	1.92436	1.90052	1.95728	1.85745	1.93778	1.93135	2.16395	2.22027
WNT9B	3.0716	3.34958	3.44087	3.29006	3.712	3.19534	3.26544	3.27299	3.21456	3.38943	3.03003	2.90891	3.67092	3.66785	3.11204	3.2302	3.35259	2.99342	3.33556	3.35277	2.93316	3.4347	3.24441	2.92797	2.97917	3.53716	3.28968	3.14148	2.98325	3.44749	2.97773	3.26063	3.31521	3.46312	3.3449	3.33113	3.22126	3.35858	3.30879	3.05406	3.03982	3.18776
LINC00471	2.33405	2.1428	2.34009	2.37701	2.23657	2.16386	2.24714	2.31266	2.48887	2.16108	2.08409	2.14056	2.21225	2.10373	2.23107	2.3756	2.15777	2.16804	2.1889	2.0613	2.22883	2.33305	2.49223	2.34175	2.07233	2.20804	2.20272	2.24483	2.26503	2.20228	2.16902	2.33071	2.18215	2.07417	2.33027	2.15052	2.06045	2.24562	2.60552	2.23906	2.28667	2.13394
SLC30A8	2.91043	2.87974	3.04894	2.85777	3.32284	2.64523	2.88755	3.12376	2.61989	2.8442	3.31921	2.52468	2.78367	3.00189	3.25829	2.91607	3.19508	2.56754	3.04105	2.86507	2.81647	2.961	3.03805	3.01263	2.52003	3.03844	2.7069	2.65393	2.64099	2.80768	2.90664	2.75392	3.01467	2.82805	2.85559	3.08383	3.07793	2.8604	2.92969	2.91402	3.19256	2.90592
LOC439933	2.13005	1.98885	2.06749	1.93474	2.35248	1.99689	2.09841	1.87978	2.10108	1.99113	2.05806	2.02544	2.05661	1.95678	1.8987	2.16284	2.02584	1.97452	2.05902	2.1022	1.92519	2.13236	2.1022	1.9004	1.99265	2.24927	2.14791	2.20222	1.94209	2.01077	1.9479	2.30977	2.34077	2.13169	1.96344	2.09521	2.1125	1.93206	2.05239	2.0399	2.14253	2.05011
C11orf65	2.14652	2.04695	2.0256	2.11271	2.17609	2.11955	2.0256	2.13288	2.16033	2.29288	2.06387	2.27838	2.14361	1.89544	2.34807	2.23765	2.34085	2.08477	2.15752	1.96988	2.53133	2.06277	2.11307	2.14791	2.0981	2.01269	2.28923	2.06336	2.23351	2.01803	1.96189	2.13849	2.01305	2.10868	1.93173	2.03765	2.15569	2.05011	2.32373	2.23176	1.97214	1.78712
OR5P2	2.99774	2.72265	2.82689	2.54367	2.9169	2.42365	2.75884	3.12752	2.8252	3.41011	2.8354	2.73952	3.18826	2.77195	2.59171	2.91946	2.90344	2.70683	2.58752	2.84833	2.59798	3.05483	3.03894	2.7375	2.85298	2.80614	2.69329	3.05519	2.80382	2.61425	2.69837	2.7745	3.1378	2.68523	3.25629	3.02435	2.64522	2.91663	3.08453	2.55277	3.03528	3.05151
DYDC1	2.13315	2.27889	2.18493	2.07698	2.35101	1.97371	2.09241	2.14711	2.11642	1.98505	1.99136	2.12829	2.03871	2.04526	1.98133	1.93313	1.99037	2.12352	1.95538	1.86597	2.04255	1.96373	2.0705	2.02724	1.91445	2.11179	2.14085	2.21053	2.13974	1.96368	2.13717	2.11831	2.12125	1.93733	2.20031	1.97267	2.23656	1.9535	2.24849	1.89987	2.02086	2.17281
IL27	4.67114	4.86878	5.10952	4.84542	5.47282	4.47307	4.70746	4.57693	4.71821	4.71896	4.74129	4.65775	4.59892	4.57047	4.70918	4.83865	5.02798	4.73061	4.6176	4.70968	4.19963	5.1711	4.97436	4.70651	4.51351	4.52457	4.70399	4.44222	4.51196	4.49201	4.27466	4.35433	4.7581	4.41017	4.54107	4.69201	4.84331	4.67204	5.20458	4.51208	4.76476	4.63628
IQCF1	3.57277	3.61747	3.36202	3.35583	3.62102	3.40858	3.56968	3.78432	3.94876	4.0137	3.86786	3.66586	3.13451	3.52382	3.23496	3.6456	3.50918	3.41906	3.5546	3.71277	3.49794	3.32493	3.72048	3.47466	3.31619	3.70445	3.50719	3.36971	3.30802	3.28228	3.65775	3.32973	3.48902	3.38654	3.52621	3.51331	3.42024	3.38741	3.53813	3.4303	3.69962	3.7289
DEFB125	2.30834	2.33582	2.30697	2.74037	2.43688	2.09802	2.37269	2.35938	2.01346	2.02527	2.30611	2.12346	2.52926	2.42308	2.25954	2.36161	2.25576	2.03723	2.31233	2.62641	2.42956	2.3457	2.5631	2.33602	2.09417	2.42431	2.46045	2.3749	2.14896	2.24928	2.37884	2.47189	2.49555	2.18388	2.20299	2.34043	2.55107	2.55038	2.6066	2.03059	2.506	2.28469
WFDC10B	3.23837	3.62947	3.41011	3.23681	3.4379	3.27219	3.69427	3.42787	3.35092	3.50642	3.74768	3.15964	3.56671	3.21489	3.6845	3.08317	3.29946	3.3046	3.37151	3.46373	3.44778	3.57533	3.20814	3.7737	3.07561	3.26609	3.30634	4.00088	3.30017	3.34677	3.3533	3.58387	3.30257	3.78732	3.56508	3.45287	3.52986	3.58914	3.4303	3.20337	3.92161	3.33713
PKHD1	2.99196	3.1484	3.14495	3.11447	3.28342	2.95222	3.03138	3.07701	2.9986	3.30014	3.30578	2.95909	3.02968	2.99869	3.15792	3.02941	2.89927	3.04301	3.16809	2.85097	2.83492	3.5884	3.34683	2.93416	2.93805	2.63595	3.07615	2.85775	2.97329	2.97629	2.86911	3.18039	3.24519	3.02441	3.12667	3.03757	2.97585	2.95882	3.43722	2.84331	3.03186	2.98837
PKD1L1	2.73909	2.58838	2.61693	2.69864	2.93198	2.65778	2.67428	2.65994	2.81288	2.69706	2.50449	2.44148	2.67671	2.5156	2.82779	2.58433	2.80109	2.64571	2.7532	2.65014	2.48219	2.87224	2.51581	2.87508	2.58515	2.46522	2.77662	2.53602	2.43252	2.56309	2.38673	2.602	2.94298	2.78625	2.61694	3.04289	2.56861	2.64819	2.95534	2.67625	2.535	2.61656
ADGRG4	2.28141	2.31438	2.8497	2.66091	2.83788	2.2934	2.53791	2.66934	2.54324	2.37443	2.60947	2.37204	2.56791	2.63753	2.41946	2.94667	2.58628	2.46966	2.35004	2.32013	2.56607	2.73254	2.55806	2.55084	2.38518	2.49034	2.15732	2.94815	2.32322	2.5914	2.52844	2.32272	2.64656	2.65318	2.63195	2.54705	2.29555	2.51713	3.18826	2.46286	2.42057	2.90476
TENM1	2.62277	2.49423	2.88578	2.70378	2.76219	2.73038	2.75613	2.74779	2.56373	2.48219	2.76565	2.51039	2.49402	2.58633	2.37796	2.54812	2.50886	2.69452	2.73065	2.44853	2.37822	2.50535	2.76565	2.6574	2.44283	3.03751	2.52729	2.74773	2.62766	2.90305	2.4909	2.77964	2.77625	2.66122	2.37919	2.20873	2.49635	2.32016	2.65101	2.4888	2.41876	2.67209
REXO1L1P	3.24778	2.4352	2.9426	2.9189	3.96471	2.8227	3.24355	2.77837	2.84047	2.89888	2.92916	2.94776	2.6564	2.58236	2.63372	2.75163	2.942	2.73912	2.91824	2.82526	2.85283	2.87036	2.90498	3.20642	2.7946	3.00607	2.83137	2.69583	2.85455	2.69718	2.55574	2.67214	2.81066	2.78046	2.65984	2.48236	2.84461	2.61797	3.14538	2.49789	2.79556	2.80311
TAF1L	3.96011	4.08196	3.80187	4.31926	4.27169	3.84848	3.89491	4.12505	3.98251	4.1676	3.8503	3.44161	4.07406	3.90412	4.0579	3.86526	3.85029	3.72251	3.49912	3.66142	4.07283	4.03954	4.07838	3.70017	3.72926	4.07669	4.10447	3.87424	3.80776	3.78843	3.69094	3.94108	4.42801	3.85501	4.32484	4.0182	3.9034	3.95353	4.35719	3.56564	4.13301	3.86397
RECQL4	6.8253	6.73762	6.37991	7.43016	6.38625	6.94877	6.56393	6.64609	6.38097	6.92904	6.61464	6.94597	6.48845	6.58479	6.40085	6.81464	6.79372	7.05879	6.89136	6.41424	6.24969	6.13024	6.47755	6.50112	6.77387	6.89669	6.03492	6.71801	7.69747	6.95086	6.72442	6.47609	7.00772	6.96527	6.96275	6.50952	6.62766	7.40432	6.80063	6.72209	7.59597	7.01727
ADGRF3	3.23293	3.25675	2.99924	3.27029	3.74387	2.77007	3.11785	3.34696	3.26708	3.29868	3.38986	3.23336	3.33594	3.24311	3.13346	3.37976	3.36976	3.10276	3.34125	3.05228	3.0405	3.39357	3.31352	3.43507	2.88715	3.21599	2.77636	3.15374	2.76997	3.32655	2.9836	3.13228	3.13269	3.33521	3.1258	3.10039	3.38572	3.11582	3.53444	3.10449	3.15701	3.17366
TMC2	4.3448	4.66747	4.5621	4.4295	5.27257	4.58315	4.54037	4.80727	4.59502	4.69063	4.88524	4.59055	4.87479	4.97511	4.52367	5.00769	4.73037	4.55412	4.98672	4.941	4.409	5.11311	4.8674	4.52003	4.70183	4.62329	4.6872	4.77552	4.58165	4.66253	4.44959	4.70003	4.91469	4.80432	4.88777	4.77414	4.68129	4.28053	5.0673	4.58039	4.45777	4.18562
SMCR5	2.6841	2.6751	2.66918	3.45418	2.83468	2.9658	2.85163	2.39914	2.73751	2.6234	2.86479	2.4396	2.61618	2.62409	2.81622	2.86911	2.63803	2.54361	2.95765	2.3979	2.94803	2.93221	2.9277	2.49796	2.60294	2.74779	2.56537	2.62409	2.70234	2.69718	2.55574	2.6634	2.86751	2.77614	2.88062	2.6841	2.73381	2.72234	3.05983	2.3419	2.87239	2.70235
ZIM3	2.07633	2.20913	2.12042	2.09665	2.10414	2.11676	1.95794	2.03152	2.014	2.0199	1.99224	2.03653	2.05709	1.98248	2.0569	2.26327	2.14715	2.03185	2.02554	2.0962	2.07762	2.21341	2.2586	2.07175	2.07698	2.09975	2.14791	2.22844	2.08368	1.87649	2.00844	2.01628	2.0837	2.0743	2.21869	2.07988	2.09094	2.08643	2.12432	2.07055	1.98302	2.14017
DAOA-AS1	2.00029	2.12464	2.10268	2.13318	2.07957	2.11311	2.16179	2.07274	2.13796	2.16696	1.96575	1.91804	2.01817	2.01119	2.03034	2.16302	2.28992	2.16492	2.09178	2.00925	2.00057	2.15446	2.36077	2.02803	1.96099	2.13846	1.79457	2.23381	1.98302	2.0585	1.86474	2.13187	2.10557	2.05104	2.14189	2.14516	2.08134	1.94474	2.08539	2.08394	1.97281	2.14323
KLHL4	2.50074	2.78468	2.79498	2.8034	2.71494	2.62449	2.76417	2.95296	2.75749	2.76083	2.64583	2.83998	2.58762	2.58633	2.78092	2.66401	3.01518	2.71038	2.77291	3.02629	2.61136	2.90328	2.65297	2.94794	3.01039	2.42946	2.76124	3.05366	3.02155	2.41501	2.55903	2.79476	2.88615	2.54499	2.76222	2.73828	2.90257	2.731	2.9849	2.69015	2.64133	2.59902
ADGRF4	3.03589	3.4413	3.4293	2.78524	3.53505	3.16108	3.22065	3.1852	3.44332	3.2318	3.04197	3.82427	3.28942	3.24924	3.21733	3.17847	3.21416	3.02213	3.66601	3.28999	2.90561	3.2484	3.69884	3.75876	2.86086	2.94524	4.27735	3.65246	2.96399	4.04006	4.01218	3.44373	3.05293	3.08857	3.30178	2.9297	3.13202	3.52736	2.9591	2.81959	3.50668	3.18909
IL31RA	2.42181	2.42478	2.42544	2.5739	3.14993	2.33396	2.36068	2.55574	2.50453	2.43187	2.44774	2.43777	2.46015	2.32684	2.46885	2.46885	2.70882	2.37152	2.3889	2.45774	2.36738	2.61078	2.66796	2.23392	2.13988	2.72398	2.41567	2.49405	2.38962	2.33297	2.31195	2.54784	2.26649	2.32445	2.61693	2.83946	2.67349	2.43133	2.55125	2.15626	2.64139	2.19678
ADGRF2	2.21599	2.36841	2.29509	2.18764	2.18314	2.02305	2.2992	2.69933	2.13689	2.41641	2.26214	2.03188	2.2133	2.48964	2.15234	2.41869	2.33266	2.10392	2.21466	1.98938	1.98713	2.19127	2.2763	2.2611	2.13802	1.79951	2.2062	2.23242	2.14791	2.22684	2.05367	2.24239	2.07072	2.16486	2.38324	2.11737	2.20228	2.12252	2.45946	2.0732	2.23737	2.10044
ASB10	5.50275	5.39131	5.57188	5.56712	5.64433	5.23137	5.3951	5.54712	5.67411	5.61496	5.72534	5.42566	5.34439	5.72756	5.40729	5.90884	5.63074	5.66178	5.80113	5.47644	5.35016	5.84456	5.7302	5.52762	5.47915	5.42463	5.33834	5.27873	5.41336	5.25213	5.54559	5.51137	5.55327	5.49101	5.4934	5.60699	5.83332	5.60727	5.92939	5.23492	5.46525	5.30303
HTR3C	2.99531	2.97563	3.37781	3.24009	3.39225	2.91892	3.33385	2.90842	3.17828	3.11499	3.01906	2.77239	3.32925	3.18716	3.0027	3.05737	3.1698	3.17859	3.33054	3.14284	2.81953	3.47756	3.30562	3.099	2.94565	3.24777	2.99202	3.04288	2.88629	3.23194	2.90513	3.48251	3.00423	3.05199	3.33419	3.02772	3.31853	2.86582	3.59529	3.09394	3.14461	3.06665
CD300LF	6.29502	4.88081	6.03707	4.76568	5.5278	4.95055	4.88465	5.01748	5.29055	6.18273	4.60373	5.81974	4.47665	4.70101	4.40407	5.57991	5.28668	6.0349	4.00153	5.72938	4.87426	5.52596	4.90431	5.90895	6.03497	5.28188	5.20023	4.73495	5.28782	4.64916	5.02294	5.3004	4.63287	5.49042	4.73574	4.84686	5.03316	4.75254	4.4121	6.19523	4.52978	3.99147
GJA10	2.9403	2.77817	2.69488	2.84453	3.31063	2.87678	2.58278	2.84295	3.04816	3.24789	3.3655	2.89372	2.84477	2.87509	2.85134	3.31397	3.42198	2.75074	2.87678	2.90354	2.59798	2.94829	3.12977	3.07568	2.87798	2.8307	2.95306	2.92272	2.96399	2.99226	2.84938	2.98553	2.99956	3.29715	2.87547	2.71173	2.9434	3.07488	2.92217	2.94224	2.95008	2.91733
GAL3ST2	4.80631	4.28699	4.42032	4.90724	5.03609	4.5576	4.89411	4.93667	4.76486	4.79142	5.20612	4.63995	4.82081	5.06866	4.78767	4.96085	4.96882	4.56861	4.82427	4.79143	4.54456	5.19193	5.03895	4.83788	4.53794	5.02185	4.73587	4.60108	4.74348	4.68434	4.70661	4.89353	4.98548	4.90523	5.20869	4.943	4.92431	4.55354	4.74652	4.51687	4.77978	4.75106
WFDC13	2.42313	2.46812	1.99841	2.34453	2.37995	2.45841	2.50543	2.28986	2.46679	2.31253	2.21642	2.24033	2.2457	2.33525	2.32153	2.40944	2.41659	2.07855	2.19506	2.2158	2.24954	2.37873	2.71985	2.30878	2.03511	2.42289	2.52975	2.36006	2.22273	2.28961	2.61065	2.22285	2.35313	2.05658	2.47629	2.42074	2.37995	2.16025	2.50412	2.17969	2.42574	2.1276
SERPINB12	3.51035	3.63332	3.64621	3.34363	3.79189	3.41421	3.58381	3.6286	3.4847	3.63533	3.9599	3.43805	3.4583	3.73746	3.49065	3.86158	3.95971	3.61204	3.79836	3.60188	3.26182	3.70128	3.91655	3.67459	3.34431	3.65785	3.48746	3.27135	3.28443	3.46919	3.45336	3.70926	3.66423	3.38762	3.29737	3.59429	3.67582	3.39492	3.77051	3.45625	3.4996	3.18606
PGLYRP3	2.43437	2.67491	2.51189	2.43818	2.86995	2.21356	2.21358	2.55574	2.33576	2.42719	2.68488	2.20268	2.63119	2.39462	2.40014	2.59458	2.4909	2.44067	2.35093	2.40905	2.20998	2.54393	2.8825	2.72706	2.19078	2.39453	2.36717	2.17411	2.29027	2.25573	2.20998	2.38546	2.41802	2.46598	2.53237	2.6006	2.56879	2.24562	2.20626	2.23594	2.54229	2.29906
PSKH2	3.45879	3.45095	3.61552	3.83866	4.05355	3.33246	3.75011	3.39095	3.61438	3.6609	3.72068	3.58224	3.7317	3.68314	3.38679	3.73521	3.87699	3.09028	3.64528	3.54086	3.39332	3.50134	3.97399	3.67457	3.14254	3.83871	3.44169	3.57607	3.90287	3.72968	3.56663	3.66165	3.39319	3.37933	3.5735	3.57609	3.97039	3.58543	3.5913	3.41032	3.36851	3.5326
OR6W1P	3.77862	3.84269	3.61575	3.87437	4.29412	3.46491	3.98688	3.64216	3.81665	3.68491	3.91902	3.6178	3.43793	4.05544	3.8077	3.95981	4.11479	3.59986	3.61228	3.55251	3.67871	3.84208	3.95294	3.78747	3.59524	3.63704	3.8299	3.69541	3.38298	3.62258	3.43036	3.97408	4.32975	3.63734	3.73263	3.89965	3.55444	3.77885	3.99008	3.63703	3.74933	3.95239
MOGAT1	3.12274	3.47852	3.27036	3.6338	4.04328	3.20171	3.46749	3.42195	3.82923	3.67504	3.43145	3.42895	3.39007	3.9135	3.70478	3.63399	3.52933	3.9359	3.6488	2.96625	3.3314	3.61311	3.51393	3.54782	3.19042	3.25787	3.78328	3.33488	4.31821	3.82559	3.07557	3.46562	4.00455	3.25971	3.65661	3.88361	3.56211	3.59698	3.59667	3.372	3.71096	3.67779
GPR78	4.09863	4.06275	3.8813	3.94261	4.30999	3.64273	3.94642	4.44362	4.22526	3.76348	4.54821	3.38082	3.62024	3.71986	4.02763	4.17045	3.91799	3.90675	4.04751	4.00036	3.93069	3.89626	4.20996	4.06574	3.62917	3.62024	4.14834	3.75501	4.20158	4.18094	3.88009	3.94153	3.96645	3.97342	3.82427	3.89626	4.42327	3.79756	4.17081	3.82427	3.76182	4.0556
H1-8	3.24265	2.95706	3.45718	3.42278	3.89994	3.14552	2.96822	3.38578	3.17362	3.25733	3.37894	3.01482	3.29412	3.12432	3.0679	3.32833	3.19679	3.12022	3.17752	3.18569	3.21056	3.16246	3.38578	3.52742	3.04994	3.40547	3.48769	3.18194	3.06375	3.34395	3.22348	3.39163	3.02103	3.22893	3.13917	3.3425	3.74194	2.99854	3.37563	3.09109	3.48522	3.24723
TAAR9	2.27447	2.73821	2.51658	2.49911	2.51994	2.62899	2.50813	2.41644	2.60247	2.50223	2.42673	2.45118	2.62497	2.57199	2.60444	2.69718	2.57831	2.35556	2.6641	2.6371	2.29947	2.63364	2.82039	2.81871	2.34599	2.81762	2.55482	2.67241	2.46928	2.49281	2.63029	2.39669	2.8165	2.28558	2.45501	2.67795	2.59517	2.49654	2.73913	2.70489	2.43767	2.43753
GNRHR2	3.34472	3.08767	3.4013	3.06485	3.34156	3.27138	3.28346	3.49964	3.52583	3.29957	3.52713	3.23888	3.2959	3.48794	3.3065	3.50167	3.35118	3.2607	3.26605	3.55776	3.35626	3.60607	3.25436	3.25854	3.11117	3.24595	3.19857	3.11528	3.31689	3.5809	3.4263	3.37231	3.54739	3.40643	3.44904	3.36563	3.07811	3.36408	3.67136	3.2066	3.46127	3.15849
BNIPL	3.21106	3.04614	3.06611	3.09931	3.09387	2.74749	3.0392	3.13057	3.02792	3.09627	3.3725	3.16674	3.71995	3.16529	2.8851	3.13028	3.05926	3.21903	3.3257	2.84461	2.90101	2.95141	3.36833	3.07568	2.87953	3.1812	3.16727	3.40913	2.94845	3.11547	2.96013	3.02582	3.22298	3.03983	3.13942	3.1016	2.95929	3.36187	3.18478	2.90225	3.00238	2.91838
ASB11	2.60976	2.58859	2.54765	2.88342	2.64816	2.55586	2.60584	2.54502	2.60005	2.5479	2.70771	2.21487	2.64735	2.69584	2.48673	2.85356	2.79666	2.60153	2.81459	2.38906	2.33905	2.7487	2.79014	2.72967	2.52432	2.6997	2.57763	2.55114	2.69264	2.97742	2.55574	2.69546	2.58145	2.62859	2.44584	2.53832	2.72042	2.7936	2.59935	2.59443	2.92806	2.44317
SDR9C7	2.28684	2.33185	2.75938	2.32522	2.65563	2.3386	2.4392	2.31127	2.42771	2.46403	2.48441	2.50537	2.4392	2.55588	2.31166	2.37183	2.4157	2.14833	2.45457	2.65197	2.63525	2.28126	2.68779	2.54284	2.14833	2.48177	2.37063	2.57296	2.32371	2.4392	2.19755	2.51681	2.80249	2.38358	2.53057	2.61316	2.57449	2.25405	2.31929	2.308	2.40087	2.44184
OR5P3	2.25467	2.78678	2.44046	3.0798	3.40512	2.39413	2.70632	2.83394	2.73732	2.98952	2.67488	2.92312	2.28384	2.69878	2.48233	2.90377	2.80562	2.4695	2.70668	2.87641	2.66439	2.9862	2.57782	2.72336	2.84365	2.44739	2.77624	2.7081	2.52792	2.59508	2.7267	2.45587	2.87073	2.68375	2.78204	3.09934	2.47856	2.81745	3.06307	2.59247	2.47697	2.67914
TRIM40	2.77543	2.95814	3.27087	3.08704	2.96848	2.55981	2.7802	2.97216	2.76815	3.25348	2.79531	2.65803	2.82585	2.98814	2.79531	3.16408	3.51648	2.61797	2.96968	2.67862	2.50911	2.78905	3.11593	2.6415	2.65554	2.89454	2.55403	2.9351	2.77908	2.69615	2.83809	2.95521	2.80211	2.73593	2.84393	2.63463	3.09127	2.82613	3.45553	2.65291	2.83338	2.78835
CSN1S2AP	2.11221	2.16058	2.43623	2.36533	2.35293	2.20881	2.24967	2.17851	2.03258	2.27056	2.4465	2.15373	2.48887	2.3799	2.15927	2.49044	2.37466	2.2655	2.06427	2.40674	2.25378	2.26373	2.46774	2.26735	1.97735	2.57769	2.25528	2.21077	2.19571	2.30115	2.39633	2.21519	2.44574	2.21029	2.34534	2.17074	2.21923	2.1181	2.24327	2.11249	2.40506	2.12331
WFDC12	4.374	4.55711	4.37493	4.80695	5.17674	4.13791	4.80695	4.86511	4.55494	4.69217	4.70872	4.43927	4.69838	4.76747	4.17692	4.91742	4.65058	4.57256	4.68421	4.35629	4.26502	5.01676	4.66275	4.65793	4.14222	4.9971	4.27862	4.23697	4.42338	4.64602	4.42544	4.62334	4.40737	4.51369	4.93748	4.59212	4.58516	4.51338	4.7842	4.30925	4.4773	4.32357
CRYGN	3.67629	4.01841	3.84321	3.66776	4.27464	3.65931	3.82189	3.89046	3.77898	3.73198	4.14718	3.87105	4.02406	3.97469	3.81865	3.83289	3.88597	3.40642	3.55421	3.72504	3.66618	3.75712	4.00089	4.07181	3.6541	4.00816	3.8082	3.74345	3.69868	3.74715	3.84209	3.77592	3.87177	3.77726	3.84114	3.68622	3.76206	3.64933	4.47885	3.57353	3.86842	3.59179
STARD6	2.27792	2.22062	2.1274	2.25841	2.69958	2.15367	2.20115	1.99403	2.53089	2.26278	2.47098	2.27475	2.54607	2.27408	2.31162	2.13792	2.22327	2.07133	2.22327	2.2947	2.04216	2.33257	2.30568	2.34158	2.24889	2.10801	2.56556	2.23381	2.32653	2.00682	1.9864	2.20346	2.4351	2.43666	2.35513	2.64135	2.18462	2.11862	2.56771	2.20724	2.34439	1.9807
C11orf40	2.06985	2.31097	2.20007	2.20849	2.5025	2.03177	2.42742	2.0016	2.197	2.35888	2.23443	2.23936	2.15962	2.21126	2.12942	2.33401	2.36528	2.08517	2.81988	2.1261	2.3299	2.16453	2.22047	2.30898	2.03246	1.96946	1.99439	2.03724	2.14876	2.08609	1.86174	2.1324	2.21646	1.93042	2.17719	2.10113	2.02122	2.12534	2.26087	2.04868	2.22254	2.31097
C18orf12	2.86364	2.96011	3.24348	2.9986	3.03891	2.96881	3.0285	3.0338	3.16002	3.09282	3.05961	2.97379	2.97551	2.87322	2.87592	3.09918	3.01385	2.86086	2.83709	2.76459	3.00543	2.97388	3.0698	2.98323	2.80623	3.21879	2.91995	3.15219	2.79376	2.79358	3.02931	2.9798	3.01392	2.94524	3.31954	3.07367	3.15965	2.89728	3.23773	2.9625	3.02241	2.85113
TIGD1	5.63912	6.41502	5.61853	5.77115	4.96955	6.46875	5.65238	5.39535	5.86092	5.78706	5.4214	5.634	5.02391	5.43547	6.42301	5.95417	6.1095	5.37446	5.73953	5.50947	6.01425	5.39941	4.80963	4.8328	5.2276	5.14398	5.34122	5.50894	6.41939	4.09716	5.88901	5.56833	5.97519	5.62658	5.8585	6.10471	5.14542	5.82175	6.4206	5.5323	5.57439	5.52659
NFX1	7.09147	7.48847	7.02642	6.74899	6.43574	6.2369	7.53072	6.45551	7.16043	7.29835	6.05831	6.42361	6.76182	7.20691	7.82006	6.84311	6.75646	6.6817	7.74086	6.66227	7.5846	6.81296	7.00273	6.72849	6.85389	7.33879	6.9225	7.14357	7.06182	6.6231	7.39865	7.15266	6.87936	6.755	6.31602	7.11557	7.04207	6.61972	7.78485	6.821	7.06449	6.12566
THEM4	4.94701	5.41193	5.70633	5.20731	5.71794	5.33446	5.43194	5.47351	6.39262	5.17966	5.45732	5.1458	4.86072	5.55268	5.7537	6.18843	5.46344	5.46097	5.45508	5.87203	5.71655	5.26189	6.4293	6.28624	6.6623	5.85678	5.29434	5.47254	5.45325	6.25187	4.98332	5.04917	5.43375	5.59607	5.91057	5.16791	5.04828	5.46878	6.30159	5.38429	5.24728	4.66857
SLC39A12	2.00376	2.12681	2.2724	2.13024	2.09196	2.08867	2.16014	2.27825	2.17866	2.09062	2.18002	2.11859	2.07624	2.0828	2.19326	2.30255	2.19988	2.04048	2.14842	2.09653	1.883	2.15647	2.1278	1.92985	2.17751	2.15669	2.16614	2.10287	1.90219	1.98302	2.20104	2.05008	2.1718	2.07884	2.04603	2.07827	2.00907	1.91474	1.94918	2.03441	2.07501	2.1205
LOC652276	5.2095	5.31621	5.2184	5.29952	5.55433	4.91542	4.86747	5.3737	5.13995	5.01636	5.59012	5.16222	5.30242	5.4203	4.75963	5.22542	5.14246	5.19894	5.37554	5.22634	5.19015	5.20755	5.47135	5.17886	5.04779	5.34399	5.06375	4.95495	5.13532	5.03363	4.84394	5.14448	5.30634	5.35038	5.64168	5.17311	5.23309	5.41922	5.77054	4.97876	5.13449	5.172
ANKLE1	2.353	2.31384	2.77549	2.48226	2.39104	2.76475	2.63552	2.79983	2.6774	2.36202	2.97355	2.02918	2.73169	3.58648	2.40001	2.8564	2.09674	2.43034	2.4539	2.60019	2.67567	2.40131	2.61026	2.60053	2.26853	2.59707	2.32886	2.73485	2.40601	2.5409	2.45217	2.21377	2.1523	2.49618	2.01353	2.31128	2.82057	2.34914	2.555	2.37271	2.21909	2.68366
TAPT1-AS1	3.85869	3.12207	4.55473	5.5914	3.27623	3.33986	3.36653	3.57713	3.12916	3.90193	3.34103	2.84268	3.52863	3.55297	2.98422	3.59414	3.11366	4.77648	3.08718	3.50144	3.19207	2.86491	3.19872	3.17656	3.15881	3.72504	3.40541	3.88242	3.52596	3.90399	3.45124	3.38037	3.48839	4.37228	3.95011	4.32166	3.53685	3.73551	3.84643	3.36632	3.23348	4.30795
TEX55	2.43073	2.46077	2.37991	2.40677	2.89509	2.19614	2.34698	2.57199	2.21509	2.61693	2.38953	2.33063	2.65741	2.60523	2.07739	2.93496	2.49249	2.26626	2.17401	2.25448	2.02112	2.5002	2.75511	2.35073	2.37409	2.27068	1.99998	2.42042	2.18033	2.6259	2.08628	2.38807	2.4963	2.07991	2.51714	2.25033	2.64223	2.39517	3.09393	2.35682	2.50545	2.18661
RANBP3L	2.22865	2.01623	2.04613	2.30142	2.27535	2.09938	2.05943	2.06082	2.04478	2.28438	2.1034	1.99504	2.23705	2.01037	2.05274	2.47466	2.48597	2.11807	2.06696	2.03434	2.07169	2.05852	2.37611	2.06741	2.19201	2.05096	2.42031	2.31496	1.99824	1.95896	2.00261	2.09257	2.17583	2.09363	2.31183	2.11271	2.07855	1.94585	2.00928	2.00533	2.17596	2.04481
ATP6V0D2	4.3399	4.08112	4.59138	4.91101	4.53529	4.3467	3.94571	4.30093	4.41571	4.62712	4.3526	3.99719	4.37961	4.13625	4.27468	4.15026	4.79638	4.16982	4.30385	4.6594	4.29396	4.46541	4.19761	4.73921	4.70544	4.37998	4.42278	4.30538	3.95051	4.33949	4.14983	4.36789	4.27468	4.3455	4.50553	4.36407	4.09658	4.26191	4.34508	4.3505	4.15133	4.35083
LHX4	2.71245	3.51456	3.11653	3.11273	3.44892	3.10448	3.32028	3.21681	3.54087	3.39639	3.28974	2.98517	3.15634	3.49069	3.19616	3.55905	3.36891	3.3245	3.39924	3.37707	3.32772	3.30624	3.32639	3.50462	3.40932	3.12369	3.36548	3.3649	2.98614	3.15634	3.21003	3.13709	3.30493	3.21528	3.23341	3.10448	3.29871	3.00886	3.0728	3.10637	3.60249	3.32028
CEP19	4.74145	4.82833	3.92902	4.46652	4.90197	4.46182	4.23035	5.26499	4.95576	5.04807	4.3267	5.36188	4.19243	3.92762	4.702	4.79171	4.80314	4.24611	4.77537	4.73927	4.90825	4.75684	4.90626	4.88322	4.42456	4.35848	4.462	4.71025	4.05518	4.76755	4.45822	4.38213	4.27422	5.167	4.80698	4.72152	4.35272	4.92707	4.2901	4.2191	4.01644	4.58953
DNAH11	4.34813	4.48319	4.47171	4.45996	4.7609	4.23406	4.36529	4.53044	4.3193	4.45593	4.70658	4.19617	4.39368	4.62127	4.23141	4.55937	4.22197	4.2857	4.54561	4.34875	4.30814	4.46051	4.51607	4.42441	4.17222	4.66277	4.33364	4.50638	4.47678	4.5902	4.2529	4.24934	4.69554	4.24069	4.27858	4.30462	4.41606	4.28178	4.51023	4.18128	4.41078	4.23141
PROSER3	4.21298	4.04236	4.38497	4.88201	4.45463	4.61177	4.38622	4.53825	4.61749	4.18065	3.94543	4.72968	4.63899	4.9179	5.50569	4.63265	4.85042	4.37992	4.4244	4.76409	4.94365	4.80859	4.22	4.68026	4.14741	4.87019	4.60046	4.38946	4.45521	4.95804	4.3672	4.63875	4.80615	4.79603	5.1184	4.77117	4.32234	4.88798	5.01526	4.38901	4.75781	4.87259
CDH24	4.55419	4.59808	4.99839	4.71206	5.0712	4.25869	4.52101	4.67477	4.51408	4.85952	4.73383	4.52126	4.70469	5.16466	4.66303	5.0851	4.89452	4.58237	4.76391	5.08462	5.15924	4.88499	5.22488	4.87162	4.49838	4.72334	4.20862	4.89825	4.56412	4.3939	4.84791	4.79352	4.98739	4.42675	4.67322	4.55797	4.60386	4.98961	4.71124	4.65647	4.71775	4.83784
LRRN4	4.08722	4.14133	3.84749	3.72946	4.32812	3.83762	4.08313	3.76367	3.66083	3.99685	3.69137	3.87724	3.5175	3.67163	3.66888	3.98937	3.70992	4.00586	3.77564	3.37442	4.08959	3.75998	3.47609	3.70992	3.58368	3.75723	3.8444	3.64985	3.58372	3.64244	3.54721	3.47086	4.03622	3.896	3.75135	3.76586	3.8009	3.51906	3.95224	3.67947	4.1714	3.62063
ZNF777	5.80617	5.58553	5.56246	5.48764	4.99233	5.91258	6.25107	5.63946	5.0753	6.03884	5.40089	5.83344	5.46225	5.58957	6.19274	4.53909	5.77508	5.51276	5.73502	5.7855	5.6703	5.96843	5.45239	5.68532	5.7784	5.51168	5.39739	5.94668	6.53816	5.5803	5.83046	5.35024	6.03577	6.03616	5.62061	6.04914	5.37771	5.87609	5.70291	5.88549	5.90793	5.91754
JPH2	4.28484	4.34369	4.34296	4.09758	4.89162	4.27852	4.7037	4.20976	4.79521	4.40552	4.56597	4.15843	4.34505	4.5164	4.24415	4.81013	4.43453	4.50461	4.63892	4.36886	4.28294	4.4645	4.56713	4.31477	4.15127	4.68649	4.44729	4.72021	4.33714	4.34606	4.28752	4.6786	4.57203	4.33699	4.30407	4.46132	4.60792	4.52465	4.62026	4.23648	4.6372	4.26071
SH2D1B	2.62498	2.62266	2.54164	2.75556	2.83484	2.76091	2.64071	2.68135	3.04221	2.51558	2.59065	2.81226	2.61842	2.86844	2.78679	2.55023	3.54497	2.48445	2.81903	2.62641	2.63001	3.16352	2.61195	2.63822	2.43209	2.53824	3.09361	2.28999	2.67762	2.93987	2.62268	2.72895	2.56558	2.77009	2.79768	2.61182	2.6848	2.81531	2.62162	2.79011	2.93839	2.64443
SSTR3	5.42762	5.46997	5.59456	5.55302	5.93684	5.38972	5.55389	5.35064	5.60809	5.62145	5.50367	5.31771	5.65172	5.54066	5.41231	5.57705	5.70054	5.35586	5.42626	5.36122	5.35836	5.70013	5.31032	5.35555	5.24297	5.29454	5.94995	5.59046	5.36959	5.36426	5.27673	5.48816	5.50694	5.52362	5.60572	5.59479	5.04828	5.27369	5.55391	5.23648	5.31338	5.45022
ADAMTS19	2.57114	2.66294	2.93673	3.01851	2.65058	2.74239	2.85509	4.688	2.7955	3.25316	2.58927	2.50534	2.46021	2.5339	2.51478	2.8408	2.62525	2.47055	2.19498	2.72497	2.38785	3.96565	2.45377	2.68892	2.47689	2.78767	3.18009	2.56373	2.35357	3.53928	2.56838	2.99078	2.49555	2.69847	2.69464	4.96399	2.3758	2.32998	2.63194	5.85343	2.34561	2.61436
UMODL1	2.04081	2.14409	2.1466	2.39414	2.17627	2.30291	3.24273	2.21106	2.14795	2.28353	2.4642	2.20913	2.01101	2.6195	2.03777	2.09508	2.2297	2.2786	2.02312	2.07109	2.31433	2.28835	2.00372	2.00602	2.23099	2.11194	2.15463	2.14369	2.03135	2.07866	2.41058	2.0016	2.16267	2.11311	2.09362	2.15356	2.10681	2.47431	2.21703	2.09896	2.41778	2.06156
ZNF441	2.04071	2.1586	2.52855	2.13732	1.94471	2.20062	2.20713	2.3443	2.22392	2.08366	2.34295	2.21674	2.13988	1.99886	2.50411	2.08371	2.29863	2.13716	2.25431	2.26813	2.28052	2.23028	2.47113	1.97899	2.24697	2.0186	1.91765	2.31709	2.00803	2.24516	2.07752	2.27526	2.07629	2.13025	2.27013	2.01554	2.48632	2.14003	2.15571	2.09446	2.09363	2.07392
FCRL3	3.3692	2.92288	3.20945	3.40627	3.29219	2.76736	2.97187	3.07987	2.91457	3.24019	3.3655	2.82763	2.93431	3.09664	2.71163	3.1514	3.03528	2.93679	2.84142	2.92048	2.92089	3.47133	2.96929	3.04353	2.86933	2.95176	2.90752	3.50976	3.03528	3.09792	2.90331	3.19424	3.34258	2.79921	3.06145	2.92523	3.55252	2.89909	3.48004	2.86289	2.94163	2.89923
DCAF4L2	2.20652	2.37462	2.29158	2.20446	2.17695	2.19307	2.31736	2.01976	2.23648	1.89406	2.027	2.17249	2.50153	2.17324	2.22581	2.07984	2.20138	2.11469	2.12788	2.09199	2.19979	2.05156	2.21369	2.27975	2.18432	2.15374	2.42687	2.18677	2.28132	2.29697	2.17927	2.07235	2.05504	2.18313	2.06088	2.19564	2.23888	2.08593	2.36606	1.9034	2.08996	2.20023
MIR1-1HG-AS1	5.14082	5.3051	5.12092	5.30691	5.54257	5.25816	5.06913	5.15401	5.10965	5.20541	5.29791	4.98895	5.3405	5.30056	4.95926	5.2806	5.26915	5.16453	5.11988	5.14877	4.92218	5.32075	5.20119	5.41738	5.11787	5.16524	5.23078	5.16966	4.9896	5.05711	4.9318	5.14035	5.19252	4.93123	5.37253	5.02216	5.23309	5.23216	5.36332	4.84626	5.23978	5.06157
KRT78	2.99437	3.20875	3.08854	3.18298	3.32513	3.17985	3.13028	3.19294	3.36136	3.36022	3.2957	3.26594	3.30854	3.32602	3.06945	3.18438	3.50187	3.17181	3.07379	3.24831	3.09338	3.53014	2.98307	3.1809	3.25117	2.94524	3.12271	3.10419	3.01389	3.18221	2.86993	3.29461	3.09271	3.18657	3.02227	3.14266	3.19616	3.19424	3.38261	3.46298	3.32107	3.22807
ZNF41	3.75808	3.10077	3.16149	2.61206	2.77341	2.82905	2.73893	2.61751	2.81287	2.86982	2.81851	3.05965	2.77994	2.95929	3.12129	2.89779	2.9763	2.8293	2.91218	2.87491	3.08985	2.99467	3.22685	2.91513	2.76155	2.6431	2.89362	3.9039	2.84082	4.00295	3.07917	3.06546	3.15928	2.45443	2.9935	3.30786	2.91962	3.01525	2.43644	2.77772	2.68354	2.7425
ZNF583	3.44606	3.68849	2.90693	3.51554	3.42303	3.02111	3.08683	3.33367	3.2981	3.14321	3.16427	3.37118	3.38273	3.27419	3.72652	3.45669	3.08458	3.54967	3.11625	3.44573	3.4262	3.19987	3.33755	3.11544	3.31491	3.41412	3.15078	3.25469	3.00591	3.01547	3.21664	3.21876	3.7058	3.23379	3.16347	3.2509	3.14756	3.46685	3.49924	3.52078	3.43202	3.57117
OXER1	6.77174	6.68113	6.74734	7.18662	7.27094	6.65065	6.53462	7.01734	6.63903	6.89031	7.11769	6.5024	6.58051	6.75528	6.86011	7.05284	6.99185	6.75709	6.70398	6.91687	6.72911	6.97543	6.73393	6.66634	6.66219	7.11846	6.67655	6.74873	6.66603	7.0789	6.55496	6.85962	6.79616	6.74587	6.94332	6.70346	6.75323	6.48972	6.8838	6.47914	6.7394	6.54808
LINC00052	2.71468	2.72438	2.58244	2.96783	2.79964	2.57409	2.48594	2.85967	2.85958	2.71326	2.71157	2.62541	2.81822	2.799	2.61705	2.73169	2.7578	2.60702	2.71679	2.64399	2.75183	2.80359	3.18644	2.70292	2.55739	2.94524	2.63523	2.78754	2.61705	2.70711	2.51721	2.8434	2.92085	2.60733	2.74434	2.63292	2.76927	2.50456	3.10252	2.59953	3.043	2.61891
CCDC89	2.035	2.0524	2.0485	2.2357	2.01997	2.10467	2.0399	2.20309	2.08797	2.2429	2.01142	2.0591	1.88898	2.03099	2.27068	2.00935	2.04124	2.15828	2.30704	2.31873	2.14389	2.02661	2.14247	2.09838	1.95569	1.82929	2.02183	1.95452	1.83063	1.79216	2.2694	2.00314	1.91934	1.96857	2.0313	1.86912	2.22688	1.972	1.95013	1.99089	1.87544	2.12703
ZNF572	4.17722	3.4419	3.97456	3.89555	3.32627	3.49357	3.33254	4.01623	3.56415	3.51057	3.53639	3.94277	3.75829	3.52525	3.5204	3.2739	3.75034	3.81476	4.18886	3.83753	3.63891	3.67564	3.84503	3.51824	3.63173	3.36953	3.5181	4.11339	4.51975	4.36872	3.73186	3.81034	3.53293	3.60162	3.5181	3.89849	3.36182	3.5692	3.46118	3.4252	4.09409	3.53016
ADAMTS18	3.17683	3.43865	3.9219	3.46157	3.7284	3.11918	3.41634	3.25954	3.36213	3.33107	3.74161	3.10973	3.358	3.24369	3.21258	3.34987	3.43905	3.34672	3.25128	3.12695	3.11283	3.43208	3.14343	3.42977	3.20039	3.40136	3.15136	3.52964	3.15645	3.35235	3.07665	3.6092	3.05424	3.40698	3.42831	3.49951	3.43619	3.44294	3.3327	3.15099	3.14948	3.19267
PCDHAC1	3.07582	3.34246	3.79763	3.35381	3.5346	3.3215	3.21468	3.2667	3.86906	3.45951	3.43744	3.51341	3.32685	3.56987	3.34359	3.70933	3.69199	3.11964	3.46729	3.4387	3.52604	3.62466	3.5104	3.4553	2.84259	3.50955	3.42402	3.15015	3.2283	3.42358	3.37952	3.58612	3.42551	3.29088	3.35873	3.47654	3.665	3.44476	3.33649	3.43375	3.48927	3.41979
HIPK4	5.42479	5.58571	5.27853	5.57701	5.85119	5.38122	5.42496	5.35693	5.47815	5.57398	5.86678	5.30036	5.76829	5.42829	5.31602	5.61532	5.45779	5.51894	5.56757	5.41824	5.18143	5.46696	5.66768	5.54943	5.15223	5.5931	5.47222	5.63926	5.32551	5.59536	5.49265	5.33369	5.52511	5.22815	5.89221	5.63015	5.75232	5.48167	5.67981	5.32268	5.5102	5.70324
NKAIN3	2.79356	2.49748	2.88358	2.76167	3.15945	2.71403	2.59684	2.85484	2.85529	2.99907	2.72239	2.53227	2.7521	2.84582	2.9711	3.10671	2.68279	2.58554	2.67452	2.68543	2.8875	2.6554	2.87381	2.63783	2.45848	2.99746	2.78965	2.74774	2.64646	2.74651	2.61693	2.74294	2.88896	2.64325	2.89951	3.08169	2.79974	2.83951	3.1536	2.77706	2.92835	2.75462
POMK	3.56481	3.40698	3.57972	3.64395	3.61277	3.12885	3.5246	3.73816	3.24466	3.86657	3.3278	3.40956	3.13214	3.41839	3.34242	3.51108	3.90857	3.65933	3.81308	3.66486	3.55974	3.89599	4.3455	3.61879	3.11955	3.29687	4.09283	3.51843	3.25964	3.19356	3.78688	3.63593	3.62852	3.41031	3.96026	3.52654	3.67403	3.67574	3.72732	3.31699	3.82362	3.51969
SMC1B	2.29183	2.57627	2.38638	2.78915	2.55222	2.27573	2.52942	2.48053	2.61269	2.56265	2.7923	2.57136	2.58397	2.89844	2.49049	2.77159	2.7775	2.39425	2.68083	2.423	2.46498	2.56856	2.72041	2.59926	2.46817	2.41221	2.81664	2.36978	2.59744	2.16653	2.31344	2.62873	2.67422	2.63814	2.61574	2.49461	2.80821	2.49682	2.71442	2.39857	2.93302	2.63121
ASB16	5.43322	5.35193	5.21874	5.21543	5.89374	5.2365	5.43859	5.7125	5.83385	5.56213	5.90671	5.23304	5.43107	5.4383	5.49824	5.75072	5.77878	5.29602	5.17682	5.55061	5.41753	5.71542	5.83479	5.45392	5.26723	5.66292	5.51252	4.9952	5.02023	5.55844	5.2113	5.50978	5.74786	5.22895	5.47905	5.62214	5.44205	5.45336	5.86872	5.27194	5.66244	5.25533
MAGEE2	2.29462	2.60757	2.19824	2.56496	2.33727	2.43451	2.34313	2.30765	2.37851	2.45781	2.52118	2.32019	2.31516	2.20092	2.4521	2.6883	2.45258	2.14051	2.35609	2.55022	2.42341	2.5002	2.45099	2.16552	2.28373	2.0945	2.45878	2.46037	2.44194	2.34755	2.25884	2.4309	2.71971	2.50024	2.88372	2.36526	2.37285	2.47059	2.50056	2.29667	2.30254	2.33861
ERVV-1	2.35279	2.36858	2.75651	2.67872	2.91665	2.2908	2.47869	2.42509	2.34152	2.60852	2.66148	2.55834	2.51029	2.58374	2.22858	2.50386	2.48917	2.48136	2.64198	2.62275	2.35369	2.77787	2.72309	2.42906	2.28992	2.72256	2.42778	2.25905	2.45029	2.47593	2.28179	2.34816	2.92746	2.49699	2.39177	2.50658	2.67045	2.401	2.64366	2.36165	2.5487	2.63816
GAL3ST3	4.14477	4.27317	4.21518	4.52621	4.47076	4.02903	4.36652	4.2947	4.18344	4.28899	4.35327	4.14119	4.09568	4.27354	4.21185	4.21426	4.36771	4.24992	4.25166	4.21593	4.06158	4.19684	4.54527	4.16837	4.09615	4.2146	4.10862	4.10362	4.04426	4.14435	3.97776	4.32572	4.2266	4.27205	4.10708	4.2245	4.34945	4.43649	4.20676	3.86702	4.22751	4.05523
FLJ30679	3.57281	3.44605	3.65094	3.89444	4.04896	3.28924	3.39943	2.93595	3.49229	3.73509	3.37118	3.29045	3.4998	3.89928	3.49036	3.32773	3.86355	3.85133	3.49784	3.45688	3.27584	3.69544	3.73627	3.67606	3.66865	3.63712	3.5587	3.80781	3.44338	3.5394	3.45817	3.49959	3.50298	3.29183	3.54718	3.9691	3.68025	3.62668	3.8389	3.52304	3.51274	3.29183
UTS2R	6.01705	5.9262	5.97623	5.93061	6.65405	5.96897	6.17716	6.17859	6.14803	5.96075	6.28172	5.87034	6.28163	5.87015	5.82589	6.2852	6.21165	5.99663	6.49003	6.02013	5.8871	6.3198	6.27677	6.06133	5.85538	6.29466	6.08221	6.18961	5.83738	5.9432	5.90799	6.16234	6.33619	6.04229	6.09292	6.00113	5.80315	5.90524	6.23884	6.07195	6.22808	5.94849
USH1G	5.1135	5.08571	5.17408	5.16795	5.94094	5.10737	5.49685	5.46783	5.13857	5.39062	5.76331	5.14259	5.32063	5.10769	4.95716	5.49364	5.47844	5.30648	5.34127	5.30942	5.10215	5.70393	5.61773	5.45893	5.00149	5.38599	5.24724	5.23296	5.24208	5.4043	5.11871	5.45451	5.41714	5.4079	5.61464	5.38824	5.29532	5.16959	5.33589	5.13428	5.39507	5.24786
SYN1	4.98393	4.57094	5.02965	5.11159	5.32177	4.55749	4.48091	4.89332	4.51985	4.91195	4.72481	4.6301	4.65561	4.73972	4.41623	4.7821	4.99254	4.50861	4.70246	4.82421	4.64195	4.94498	4.87371	4.73254	4.33949	4.74483	4.72061	4.9306	4.37692	4.74561	4.56826	4.91423	4.99388	4.80978	4.79281	4.69852	5.41789	4.77151	5.1603	4.38647	4.87308	4.67104
ZNF718	3.36462	2.5328	2.35313	2.3059	2.26589	3.09547	1.70174	2.12367	2.31556	2.13459	2.76115	2.28214	2.54707	2.26679	3.88603	2.20385	2.25576	2.15826	3.03942	2.52875	2.21036	2.22822	3.32596	2.01063	2.14773	2.03189	2.93871	3.18805	2.40962	2.82905	2.09775	2.00359	2.10828	2.08983	2.02582	2.09781	2.15569	2.86022	2.58127	2.51862	3.79315	2.25166
ZNF560	1.9707	2.20524	2.04402	2.29759	2.19979	2.04623	1.98302	2.12905	2.01524	2.15545	2.11494	2.10418	2.15985	2.12745	2.10578	2.06286	2.08057	2.15054	2.03264	2.21879	2.14285	2.14802	2.42114	1.9593	2.0528	2.21172	2.21638	2.06869	1.8525	2.15923	2.10527	2.2543	2.15617	2.02927	2.29759	2.24222	2.07751	1.85435	2.08381	2.08649	2.07317	2.05772
PLCXD2	3.48548	3.78409	3.84536	4.01685	4.02831	3.86908	3.81403	4.08095	3.54193	3.6906	4.12692	3.30045	4.25807	4.04307	3.49973	3.77976	3.72326	3.75284	3.6843	4.06875	3.42618	3.7465	3.83879	3.71224	3.55644	3.84946	3.82036	3.44014	3.45336	3.55813	3.75027	4.17366	3.83945	3.69858	3.68144	3.84831	3.61707	3.62541	4.25311	3.62747	3.76437	3.76692
UMODL1-AS1	2.62498	2.89175	2.49512	2.70957	3.60117	2.86622	2.5538	2.92697	2.61005	3.06713	2.94381	2.6554	2.81311	2.93333	2.79861	2.92453	2.85067	2.69498	3.10677	2.95415	2.54571	2.78058	2.7829	2.80247	2.68551	2.56856	2.60139	2.3094	2.59902	2.79975	2.84046	2.64233	2.84216	2.94188	2.84028	2.74485	2.74617	3.03917	3.11445	2.95539	2.66674	2.51484
RAD9B	2.21878	2.18716	2.26363	2.0912	2.31453	1.86916	2.16892	2.06661	1.97242	2.29839	2.31246	2.13205	2.25107	2.13881	2.25325	2.25576	2.08405	1.99109	2.09975	2.18827	2.17303	2.36059	2.26076	2.04991	2.01519	2.03174	2.4149	2.13529	2.06673	2.08329	2.11496	2.54289	2.11568	2.39042	2.111	1.93391	2.00903	2.08482	1.97756	1.97688	2.18171	1.94332
ZNF555	4.59117	4.9714	5.08637	3.42889	4.65942	4.98519	4.54709	4.91297	5.1953	4.80081	4.68136	5.15886	4.64023	4.72105	4.76401	5.05925	4.63581	4.63581	4.75651	5.09494	4.62515	4.23636	3.96758	4.50101	4.73857	4.73062	5.02155	4.96924	4.44237	3.82456	5.10744	4.68979	4.4894	3.80261	4.58725	4.4882	4.74792	4.58928	4.81537	4.93335	4.165	4.75848
NYAP1	3.15043	3.17555	3.41104	3.38706	3.58934	3.07236	3.27721	3.35228	3.28444	3.24022	3.53041	3.19616	3.39719	3.38759	3.128	3.48119	3.32914	3.22097	3.0329	3.01958	3.17428	3.29932	3.83019	3.51156	3.22427	2.96173	3.26142	3.43907	3.24774	3.27232	3.00288	3.509	3.2024	3.25666	3.39786	3.34542	3.52048	3.34147	3.4185	3.23048	3.53722	3.41468
MRGPRX3	2.34072	2.6953	2.67788	2.55984	2.83109	2.32875	2.66119	2.50872	2.96603	2.43443	2.58822	2.37159	2.49834	2.32438	2.74037	2.6724	2.55804	2.55028	2.54659	2.47164	2.38277	2.4375	2.49885	2.4491	2.22183	2.41501	2.43008	2.42682	2.49693	2.52602	2.3028	2.52315	2.56558	2.75812	2.54031	2.33935	2.56991	2.23646	2.57812	2.4557	2.50072	2.62136
ADGRG7	3.27373	2.69885	3.51654	2.89912	4.04404	3.68718	2.64071	3.77407	3.74424	4.56988	4.81727	3.87683	2.63057	2.80814	2.6031	4.12986	5.85788	2.71831	5.80009	5.4281	2.72427	3.85172	3.13028	4.30951	3.08623	2.50056	5.19532	7.12616	6.91985	7.8159	4.35227	6.28664	4.49033	3.059	5.31794	4.06274	4.34007	5.88204	3.19037	4.8288	3.35792	2.92524
CSF3R	6.89446	7.0171	6.15134	6.43738	6.43738	5.96022	5.59554	6.38092	6.6751	6.75105	5.96524	6.16472	6.25621	6.11779	5.68193	7.33512	6.80503	6.66749	5.90849	5.77571	6.61194	6.61646	5.63689	6.89854	7.44385	6.62329	6.1857	6.40897	6.63768	5.95306	5.88901	6.33386	6.17599	6.91601	6.40133	6.21011	6.30331	6.05611	5.94718	6.06658	5.86276	5.82067
C17orf77	2.43097	2.13288	3.14567	3.01639	2.50736	2.65285	2.42729	3.06577	2.15928	2.75977	2.68403	2.01133	2.10176	2.65867	2.17343	2.19186	2.52468	2.55368	2.39416	2.52468	2.54884	2.42586	2.42582	2.58633	2.27492	2.9043	3.00247	3.41684	2.0572	3.45224	2.89931	4.05344	2.80778	3.23263	2.48839	2.26754	2.78885	2.57136	2.20301	2.09104	2.93088	2.31233
DUSP5P1	2.11914	2.50736	2.33176	2.13349	2.24263	2.51168	2.13138	2.22999	2.47611	2.17114	2.69496	2.32692	2.33917	2.158	3.45306	2.62306	2.19224	2.52449	2.24886	2.25779	2.43519	2.49382	2.30992	2.95982	2.43499	2.2748	2.34318	2.11181	3.01365	2.29769	2.12503	2.06043	2.51548	2.27521	2.40861	2.36005	2.08134	2.06571	2.35042	2.52472	2.58137	2.46576
C20orf197	1.97263	1.97453	1.92985	2.07792	2.00555	1.78455	1.9659	2.10718	1.96928	2.20003	1.90515	1.85046	2.0213	1.90988	1.99626	1.83061	1.98796	2.01686	2.20222	2.00237	1.9382	1.94764	1.96349	2.00526	1.82428	1.97324	1.92489	1.97603	1.91487	1.8071	1.9677	1.9133	2.09293	2.08023	1.97311	1.9474	1.77047	1.99177	2.12432	1.96043	2.04414	2.00359
GPR82	3.12558	2.81281	3.38168	3.22038	2.96245	2.98715	2.94952	3.15051	3.09276	3.11505	3.16164	3.06287	3.02604	2.97856	2.81445	2.80754	3.10396	3.4573	2.77172	2.93052	2.7752	3.31193	3.72523	2.83954	2.92263	3.10396	2.93164	2.987	2.70214	2.95252	2.82856	2.91638	3.4356	2.92103	3.09126	3.05642	3.26154	3.18779	3.65117	2.99497	3.07909	2.91567
OXGR1	3.56158	3.9034	2.93455	3.11678	2.57152	2.63923	4.04815	3.60389	4.69528	2.84557	2.5918	2.87376	3.43034	3.67883	2.38179	2.4551	3.14018	2.62319	3.46213	4.38325	5.4491	3.52482	3.6048	2.97213	2.28299	2.67988	2.44966	3.41913	2.48995	3.27299	3.26702	2.59674	3.4163	2.85073	2.8882	2.8444	2.79311	2.69834	2.83089	2.4537	2.78917	2.9266
CDC14C	1.87361	2.04956	2.04785	2.07698	2.03523	1.90988	1.86512	1.88755	2.1327	1.97017	1.95527	1.98343	2.00316	1.98846	2.00135	2.2148	1.83516	2.03723	2.05715	1.95132	2.07553	2.03832	1.9986	1.99928	1.89551	1.97012	2.17468	1.98088	1.87801	2.06899	2.09284	1.97505	1.92282	2.02123	1.97915	1.80949	1.87883	2.09593	2.05006	2.03818	1.96384	1.95133
SULT1C4	2.29446	2.25641	2.39095	2.35694	2.50812	2.10547	2.36924	2.60973	2.38514	2.52699	2.52118	2.36599	2.48887	2.57545	2.35001	2.39889	2.46652	2.71395	2.67565	2.44949	2.39876	2.51792	2.41359	2.32095	6.18048	2.48279	2.41995	2.70676	2.66196	2.55593	2.2458	2.49624	2.34086	2.27447	2.31362	2.51214	2.33405	2.21592	2.71714	2.45712	2.65241	2.48259
POU5F2	2.9403	3.076	2.82102	3.17579	3.36335	3.03139	3.07462	3.04949	3.0526	3.11584	3.2842	3.06197	3.30322	3.09036	3.02797	3.14418	3.50197	3.09816	3.03433	3.02113	2.72299	2.80777	3.34774	2.92706	3.04434	3.30952	2.89194	2.92546	2.9394	3.06937	3.08426	3.11582	3.39038	3.10905	3.17866	3.06	3.07555	3.06909	3.46326	3.0792	3.12129	3.24862
RXFP2	2.15651	2.19379	2.17438	2.23987	2.33741	2.04715	2.16014	2.41885	2.12907	2.07869	2.15374	2.06803	2.21747	2.20952	2.08275	2.35469	2.14997	2.15913	2.03091	2.22395	2.11613	2.18521	2.10193	2.19922	1.99609	2.56856	2.22118	1.99141	2.04829	2.0527	2.26121	2.21386	2.49555	2.27447	2.13179	2.38082	2.36794	2.07648	2.46089	2.04675	2.35063	2.05615
SSMEM1	2.29417	2.5253	2.42336	2.36296	2.29559	2.29216	2.3111	2.19461	2.31595	2.41976	2.57967	2.32319	2.252	2.32261	2.56128	2.3382	2.1727	2.33723	2.37913	2.18859	2.21897	2.19731	2.22028	2.35583	2.07431	2.43005	2.52956	2.16633	2.26812	2.05752	2.23724	2.23955	2.18905	2.32455	2.05478	2.38437	2.25066	2.16715	2.26176	2.0994	2.2858	2.16742
MAB21L3	2.2513	2.51969	2.36051	2.43832	2.42723	2.53779	2.48767	2.18468	2.48887	2.50734	2.33561	2.19195	2.25121	2.25532	2.02106	2.21434	2.41807	2.46177	2.33899	2.22169	3.44451	2.49231	2.68311	2.09085	2.14478	2.02677	2.13891	2.26181	2.17018	2.36971	2.75304	2.59002	2.45672	2.30272	2.37404	2.46966	2.39412	2.49469	2.45402	2.27376	2.60638	2.32974
BASP1-AS1	2.22939	2.03384	2.39538	2.71616	2.37432	2.2472	2.26489	2.26027	2.20228	2.39839	2.42785	2.18073	2.38128	2.50316	2.37131	2.58939	2.35751	2.21759	2.32503	2.21278	2.37476	2.22334	2.35619	2.34377	2.37052	2.47865	2.31529	2.29537	2.38366	2.55291	2.26159	2.39409	2.67761	2.29987	2.47673	2.44443	2.49659	2.34179	2.57031	2.5145	2.3256	2.58486
UROC1	2.93692	2.79212	2.94524	2.57475	2.8227	2.74037	2.82595	2.81695	2.91695	3.11279	2.80098	2.69895	2.83393	2.87509	2.88179	3.41253	2.71381	2.7296	2.98254	2.94391	2.80317	2.85236	2.61054	2.82903	2.69465	2.70825	3.06311	2.65343	2.66884	2.54468	2.61607	2.97871	2.77935	2.77346	2.57106	2.56828	3.00676	2.73233	2.93308	2.67862	2.99309	2.77783
PCDH15	1.88681	2.03607	2.00188	2.18389	1.83901	1.95857	2.15056	2.03991	2.07716	2.02933	2.29002	2.06229	1.82866	2.07981	1.9915	2.09285	1.89365	1.92981	1.92109	2.05339	2.07914	1.86861	2.19611	1.90796	2.07884	2.17935	1.9666	2.09324	1.7819	2.0868	1.97206	1.85864	2.07917	1.97581	2.22219	2.03209	2.13197	2.1424	2.12432	2.05606	2.10673	2.05424
KCNA6	2.94831	2.88145	3.19653	3.04413	3.60514	2.93301	2.98247	3.23551	3.26594	3.00255	3.23661	3.14779	3.29524	3.25128	3.43932	3.48097	3.23641	3.55892	3.10834	3.27109	3.02816	3.24045	3.52647	3.25284	3.06568	3.44619	3.08992	2.8981	3.08593	3.1459	3.28294	3.34801	3.40665	2.91679	3.11999	3.17594	3.18882	3.21778	3.39073	2.88628	3.23024	3.2836
OTUD7A	2.49716	3.3854	3.14495	3.09906	3.04895	2.98598	2.90894	2.98598	2.5143	2.72736	3.02306	2.61763	2.71599	3.33397	2.48544	3.12616	2.87929	2.93654	2.88526	2.86231	3.06268	2.71995	3.12837	2.66366	2.60707	3.01347	2.80945	3.05494	2.80657	2.57537	2.93493	2.9403	3.28167	2.90466	2.86898	3.3179	2.84578	2.95315	2.8455	3.39513	2.88886	3.14565
ERVW-1	2.96779	3.17234	3.3212	3.12656	3.56993	3.13513	3.10982	3.08422	2.89126	3.0028	3.33655	3.15212	3.00214	3.42382	3.05561	3.57805	3.64499	3.36583	3.4532	3.66151	2.99906	4.03258	3.22371	3.30161	3.26761	3.34006	2.97443	2.96747	3.1496	3.2914	2.85275	3.19241	3.33601	3.00442	3.10982	3.17864	3.07677	3.33029	3.17281	3.19171	3.14684	3.06904
FBXL18	6.44556	6.62089	6.85555	6.56639	7.08585	6.37082	6.52549	6.66841	6.50994	6.64551	7.19377	6.371	6.74358	6.81944	6.39459	6.70995	6.65865	6.81834	6.61411	6.56077	6.36454	6.7765	6.84211	6.66634	6.09198	6.8897	6.7317	6.791	6.52018	6.55899	6.2695	6.75073	6.68491	6.5892	6.57465	6.64267	7.06636	6.60991	7.07311	6.3923	6.85706	6.76619
LINC01600	2.88529	2.80419	3.14376	2.81976	3.13584	2.77246	3.02636	2.86191	2.89426	2.96096	3.09032	2.88866	2.98241	3.16063	2.72264	3.27851	3.12471	3.13028	3.10712	2.93589	2.97884	2.96778	3.29903	3.07221	2.88493	3.03844	3.15737	3.09466	2.85479	2.81549	2.85957	3.08188	2.80738	3.20218	2.85386	2.73647	3.33547	2.84153	2.92007	2.80706	3.56851	3.12977
PNPLA1	2.84686	3.19608	2.9361	2.70914	2.7236	2.74037	2.88916	2.84173	2.85696	2.60703	2.83226	2.71127	2.89193	2.92245	2.57516	2.75138	2.84295	2.50457	2.58829	2.78565	2.92236	2.91683	3.18613	2.65597	2.66052	2.80596	2.7627	2.63767	2.69407	2.7666	2.60107	2.88711	2.57593	2.7865	2.82692	2.62249	2.88916	2.75487	2.64928	2.5726	2.64328	2.49201
DEPDC4	2.27271	2.30003	2.37143	2.49116	2.53673	2.63663	2.45366	2.40011	2.41528	2.43116	2.42353	2.30307	2.73847	2.31896	2.49833	2.40826	2.44579	2.30365	2.4368	2.55085	2.44579	2.50298	2.58526	2.14771	2.38083	2.57078	2.49555	2.19434	2.5538	2.28578	2.30365	2.28809	2.47894	2.5417	2.43548	2.37855	2.54089	2.37392	2.69822	2.42626	2.4768	2.52639
COX6B2	4.37176	4.51239	4.46309	4.217	5.05968	4.15943	4.35069	5.08125	4.36187	4.57877	4.80582	4.01515	4.67689	4.31014	4.4703	4.82218	4.49528	4.15251	4.47299	4.31662	3.99901	4.30071	4.62334	4.56798	4.45417	4.29573	5.10918	4.46403	4.39902	4.42938	4.37941	4.6169	4.59447	4.57518	5.21504	4.66278	4.57615	4.62687	5.09817	4.043	4.85179	5.48083
NIBAN3	3.50234	3.269	3.6218	3.49574	3.69599	3.44868	3.4056	3.56395	3.18807	3.22414	3.22391	3.24216	3.31863	3.35059	3.60547	3.38573	3.19627	3.34693	3.45447	3.49091	3.44451	3.6925	3.21205	3.50244	3.17953	3.40798	3.60034	3.11615	3.17761	3.3407	3.3382	3.38843	3.22801	3.39627	3.66708	3.59328	3.43615	3.43993	3.28183	3.34043	3.37144	3.55591
WDR64	2.64286	2.70919	2.371	2.85927	2.43688	2.11215	2.49555	2.28144	2.62515	2.36669	2.60968	2.45118	2.5176	2.63538	2.29538	2.95389	2.72781	2.44638	2.40741	2.60012	2.3281	2.66018	2.8473	2.34535	2.26301	2.43562	2.37624	2.28599	2.51166	2.3821	2.34891	2.46766	2.7902	2.50736	2.71506	2.45225	2.64023	2.52524	2.47811	2.48736	2.63226	2.57977
HEATR9	2.48056	2.50736	2.48671	2.52033	2.90825	2.09563	2.60074	2.55482	2.47759	2.4401	2.63729	2.44832	2.4047	2.69957	2.48236	2.49227	2.69637	2.55658	2.53003	2.3941	2.2756	2.6423	2.49878	2.4442	2.28657	2.42875	2.55765	2.33309	2.23479	2.45439	2.37404	2.29019	2.56043	2.28844	2.61925	2.41915	2.38838	2.53733	2.75598	2.42565	2.39882	2.15103
LINC01101	3.6586	3.35714	3.14495	3.34203	3.68173	3.24024	3.37062	3.74405	3.45409	3.40042	3.70159	3.34303	3.42262	3.35362	3.1424	3.89497	3.60617	3.38788	3.39582	3.33281	3.04161	3.6318	3.34013	3.42272	3.12989	3.26949	3.38624	3.38302	3.21799	3.19541	3.19504	3.57486	3.59008	3.39955	3.07963	3.52929	3.518	3.36737	3.5548	3.40239	3.23553	3.51096
CALHM4	2.67796	2.57962	2.07925	2.56067	2.90104	2.41923	2.41824	2.89132	2.53969	2.2733	2.73313	2.45105	2.65913	2.49092	2.39539	2.65349	2.93764	2.16609	2.49982	2.53624	2.62507	2.39241	2.60304	2.65978	2.38518	2.53908	2.61328	2.49405	2.369	2.59768	2.32321	2.70618	2.77211	2.25614	2.82078	2.61999	2.41814	2.6904	2.62141	2.60873	2.57477	2.43348
CXorf58	2.32576	2.75706	2.13201	2.56067	2.83451	2.11311	2.33439	2.08804	2.16306	2.45682	2.41355	2.45375	2.43473	2.61678	2.35707	2.34012	2.18889	2.17913	2.31453	2.33778	2.31106	2.65597	2.52518	2.37394	2.17503	2.35459	2.41907	2.43749	2.12481	2.43658	2.10888	2.48077	2.37836	2.36188	2.23721	2.24383	2.16875	2.2787	2.31775	2.53414	2.44028	2.38344
CD200R1	4.47578	4.24644	4.38325	4.70996	4.80705	4.03038	4.16314	4.63004	4.2426	4.33452	4.47463	4.48045	4.52299	4.67994	4.17692	4.70534	4.45497	4.36983	4.47579	4.66351	4.29406	4.77932	4.76086	4.53194	4.11305	4.42739	4.38497	4.2901	4.30334	4.27208	4.26915	4.399	4.48508	4.30281	4.39283	4.22538	4.33906	4.42229	4.4759	4.28267	4.46366	4.24959
CCDC13	5.2118	5.28906	5.29724	5.81971	5.73933	5.18313	5.20097	5.52733	5.33389	5.37995	5.63165	5.09133	5.59211	5.51044	5.06218	5.58818	5.41394	5.3035	5.42704	5.27822	5.22538	5.56267	5.65199	5.29425	5.31208	5.6243	5.39017	5.2449	5.22278	5.18126	5.07069	5.5285	5.37394	5.31608	5.36704	5.48697	5.72232	5.44753	5.59615	5.17176	5.49725	5.36372
MRGPRX1	2.03542	2.25661	2.31562	2.23904	2.20387	2.20839	2.30767	2.39946	2.26966	2.11181	2.32368	2.35998	2.22057	2.09059	2.12268	2.58708	2.17625	2.20938	2.28259	2.13872	1.92943	2.26621	2.16952	2.15113	2.27005	2.25165	2.34345	2.42187	2.17245	2.20368	2.06541	2.22542	2.06944	2.235	2.09728	2.14516	2.08134	2.38061	2.28473	2.32	2.13769	2.10855
RLN3	3.63842	3.06516	3.93187	3.63609	4.1092	3.1281	3.39629	3.2708	3.65069	3.61924	3.56651	3.3914	3.27329	3.38298	3.12284	3.45784	2.94389	3.22121	3.46071	3.25738	3.17078	3.03926	3.61459	3.44633	3.1834	3.699	3.25128	3.41989	3.47711	3.53928	3.0799	3.40882	3.50002	3.2629	3.20819	3.50968	3.52116	3.49098	3.43828	3.42832	3.35236	3.39297
ADAMTS20	2.20943	2.089	1.99505	2.02337	2.03465	2.089	2.00902	2.13342	2.02311	2.37226	2.37468	1.96304	2.37894	2.01752	2.10431	2.15381	2.37151	2.2984	2.16395	2.09204	2.03395	2.08628	2.16016	2.39779	1.9924	2.21467	2.21487	2.10801	2.14114	2.29195	2.08628	2.22122	2.30713	2.0917	2.12106	2.15718	1.96626	2.06675	2.12432	1.95318	2.20346	2.2625
ABCC12	2.58094	2.6546	3.15021	2.7396	3.46823	2.75605	2.78488	2.87187	3.24463	3.28494	2.92714	2.60198	2.57166	2.82493	2.67852	2.97998	2.90705	2.85813	3.26834	2.96733	2.68878	3.1541	3.05293	2.71586	2.83703	2.80776	2.89617	2.45647	3.37976	2.6527	2.67345	3.19153	2.99734	2.82898	2.81222	3.08635	3.17199	3.23076	2.48476	2.58457	2.72947	2.71094
AGBL4	3.1892	3.0907	3.16438	3.09283	3.21714	3.37816	3.06136	3.0847	3.33197	3.04232	3.06516	3.00323	3.23842	3.43794	3.03226	3.35129	3.52479	2.90298	3.20078	2.98301	2.95514	2.89754	3.36527	3.30918	2.84943	3.08364	3.36754	3.08862	2.92089	3.12608	3.05494	2.9129	3.23635	2.98429	2.85602	3.37857	3.10255	2.918	3.51769	2.82104	3.20218	2.99786
LCAL1	2.91623	2.96235	3.2643	3.01681	3.3488	2.88115	3.05075	2.9151	2.98162	3.02448	3.12428	2.88646	2.95568	3.08973	2.977	2.90408	3.22111	2.87174	3.39109	3.26303	3.07594	3.13666	3.12605	2.85847	2.73865	2.88604	2.75527	3.00732	2.60431	2.82281	2.6503	2.90579	2.90833	2.73348	2.95783	3.31801	3.02657	3.01089	3.15341	2.49405	3.40186	2.8942
SLC17A8	1.7831	1.80562	1.96281	2.02527	2.01077	1.78455	2.2843	1.88349	1.86047	1.86528	2.0948	1.96055	1.90063	1.95859	2.06226	1.89613	2.17353	1.93333	2.09643	1.93865	2.10603	1.91707	2.10468	1.97883	1.9798	2.09986	1.96724	1.958	1.96275	2.01292	2.03912	2.02784	1.85059	1.8283	2.01307	1.9041	1.85632	2.17079	2.10168	2.0278	2.08912	2.09236
C11orf44	2.67267	2.8021	2.81834	3.10599	2.80162	2.39311	2.54591	2.74779	2.54004	3.01777	2.74053	2.51039	3.03497	2.8282	2.67006	2.86475	2.84461	2.59953	2.71665	2.59741	2.4988	2.75923	2.75671	2.65749	2.43432	2.45046	2.73065	2.42656	2.45281	2.75538	2.50859	2.87542	3.22423	2.58155	3.07261	2.5927	2.74472	2.76204	2.86282	2.6993	2.71724	2.82342
CNTNAP5	3.45901	3.04783	3.17121	3.4261	3.28899	3.34004	3.29134	2.91779	3.38766	3.6278	3.50821	3.41047	3.22444	3.21796	3.5988	3.4403	3.44619	3.54192	3.24819	3.16342	3.16161	3.20981	3.37897	3.26236	3.3264	3.40382	3.4303	3.29255	3.29254	3.22473	3.16756	3.61021	3.81514	3.20607	3.34595	3.23267	3.30039	3.37114	3.82034	3.5165	3.49324	2.90585
C12orf40	2.87509	2.84264	2.86795	2.99889	3.23733	2.5177	2.76722	2.94629	2.6423	2.90621	2.98235	2.77857	3.02259	2.92323	2.68911	2.69718	2.79165	2.63981	2.99396	2.65044	2.50307	2.75906	2.89897	2.80487	2.71587	3.05107	2.63741	2.62436	2.58561	2.6405	2.62563	2.96222	3.01223	2.94187	2.97663	3.05004	2.91173	2.82755	3.18826	2.67862	2.8358	2.76206
CFAP57	3.29336	3.25687	3.17045	3.77568	3.17124	3.38247	3.1414	3.36535	3.01508	3.5134	3.28896	3.05293	3.36669	3.49664	3.14317	3.36669	3.21552	3.19984	3.11009	3.12497	3.21661	2.99186	3.6412	3.4196	2.90167	3.64178	3.21435	3.25228	3.50145	3.28927	2.9989	3.26901	3.49244	3.15571	3.3032	3.35716	3.21096	3.27701	3.42514	3.43315	3.34537	3.39571
C5orf64	2.6202	2.74609	2.65991	2.93228	2.57274	2.58787	2.77216	2.87987	2.57522	2.72581	2.97154	2.51749	2.79848	2.83081	2.59798	2.94971	2.6621	2.57531	2.56947	2.57311	2.65843	2.64241	2.81293	2.72207	2.52378	2.69058	2.71525	2.58479	2.7958	2.61967	2.69714	2.73193	2.67792	2.73187	2.57522	2.72956	2.72711	2.63693	2.9591	2.6428	2.70976	2.96867
ADAMTS15	4.23716	4.10474	4.13616	4.13947	4.49288	4.21472	4.23134	4.5727	4.29574	4.11545	4.3029	3.85238	4.12005	4.37236	4.11577	4.13234	4.06336	3.85632	4.07071	3.9192	4.20513	4.13797	4.55831	4.23549	3.97686	4.55456	4.27727	4.15758	4.04386	4.02823	4.31194	4.05253	4.42402	4.33924	3.89211	4.15666	4.25484	3.83975	4.13878	3.7516	4.05897	3.78919
EDARADD	2.9339	3.36908	3.43542	2.99061	3.36299	3.40681	3.16827	3.39047	2.85697	3.03745	3.33818	3.27185	3.42624	3.41955	3.51829	2.99836	3.42263	3.0492	3.60663	3.29157	3.11962	3.37838	3.29115	3.36747	3.24444	3.44836	3.38667	3.01522	3.12139	3.1687	3.11689	3.02475	3.40477	3.18966	3.43702	3.65964	3.49434	3.26761	3.4002	3.19857	3.15161	3.0725
CYP4Z2P	2.28535	2.27887	2.13093	2.27814	2.69374	2.21456	2.16253	2.63566	2.35019	2.10779	2.30215	2.29212	2.23281	2.38059	2.30024	2.35563	2.44544	2.30387	2.29415	2.35024	2.1878	2.19585	2.26635	2.3065	1.99193	2.04781	2.61373	2.09293	2.18892	2.187	2.08628	2.2035	2.45299	2.18347	2.29991	2.48195	2.10518	2.31012	2.54784	2.49554	2.42509	2.31517
C18orf15	3.24242	3.42446	3.69807	3.24001	3.84084	3.28656	3.2876	3.26578	3.17828	3.23044	3.39162	3.09959	3.20747	3.27033	3.14108	3.20049	3.24303	3.26419	3.30391	3.28097	3.01169	3.33158	3.43746	3.23828	3.10731	3.05188	3.15645	3.02178	3.18529	3.05468	3.11064	3.32245	3.43683	3.40643	3.18051	3.24613	3.46855	3.47661	3.30879	3.16858	3.47347	3.32188
MUC19	2.59587	3.11641	2.59849	2.8321	3.0338	2.86603	2.41726	3.0338	2.58353	2.82448	2.87761	2.56593	2.97038	2.93353	2.76512	2.96445	2.83007	2.90526	2.69681	2.93848	2.56616	3.04782	3.20493	2.88409	2.74718	3.06386	2.88812	2.80563	2.79014	2.78757	2.71255	2.51226	3.10946	2.85355	2.97793	2.95765	3.06461	2.67758	3.08006	2.49405	2.8457	2.83487
C11orf72	5.09467	5.0573	5.03323	5.17553	5.13084	4.93093	4.77952	5.18502	5.01958	5.04401	5.39844	4.72556	5.09537	5.12977	4.97583	5.38385	5.00251	5.15062	5.38483	5.31395	5.04495	5.29526	5.13836	5.11871	4.96066	4.84385	5.06605	4.9145	5.19399	5.11443	4.81278	5.13345	5.4681	5.10659	5.23539	5.42343	5.12512	5.31233	5.04233	4.96726	5.25635	4.74042
FER1L6-AS1	2.55426	2.59387	2.56831	2.86394	2.8393	2.33015	2.47728	2.58495	2.15206	2.7994	2.6055	2.47768	2.78931	2.48007	2.59398	2.31929	2.61855	2.58972	2.4919	2.48927	2.23082	2.65616	2.86395	2.64662	2.5054	3.10009	2.78903	2.43136	2.48904	2.48258	2.44331	2.62046	2.43485	2.54493	2.6821	2.84747	2.23648	2.7066	2.92122	2.38451	2.71724	2.49894
C1orf127	4.97535	5.04834	5.34666	4.94037	5.56299	4.73075	4.78517	5.30252	4.98693	5.06382	5.29292	4.85111	4.84644	5.32608	4.7798	5.25252	5.01708	4.92656	5.05172	4.62361	5.03733	4.97782	5.32424	5.10675	4.67345	5.20141	4.75987	4.81	4.97235	4.98874	4.83447	5.1374	5.32005	4.64014	5.17797	5.10629	5.33285	4.87274	5.29088	4.91952	5.28114	4.94825
AGBL1	2.64596	2.5822	2.62299	2.42857	3.01152	2.51154	2.38181	2.88973	2.52088	2.57143	2.84808	2.52072	2.87634	3.00485	3.12129	2.76698	2.6621	2.39553	2.85356	2.45872	2.95554	2.71658	2.69527	2.83253	2.53483	2.71658	2.85571	2.55955	2.48824	2.50743	2.87788	2.71825	2.79032	2.43776	2.87926	2.83372	2.55688	2.85609	2.81307	2.62225	2.58199	2.56762
FLJ34503	2.23027	2.15954	2.43688	2.48629	2.48613	2.29357	2.20428	2.32171	2.32572	2.43039	2.3852	2.11458	2.16405	2.4697	2.26966	2.47908	2.59969	2.21268	2.46516	2.25037	2.31412	2.39414	2.17944	2.49141	2.15267	2.27132	2.33583	2.42656	2.18663	2.56643	2.31361	2.3369	2.2227	2.35192	2.46261	2.26043	2.67862	2.094	2.6332	2.17664	2.36875	2.12455
TERB1	2.74037	2.80023	3.52093	2.88582	3.0168	2.51517	2.55867	2.60104	2.56412	2.58145	2.51971	2.45118	2.60857	2.69718	2.92377	2.95389	2.96999	2.87317	2.72916	2.73054	2.5791	2.74299	2.65318	2.41104	2.41686	2.65622	2.63802	2.6203	2.52152	2.97193	2.38722	2.71608	3.00502	2.45735	2.7452	2.84448	2.60583	2.49942	2.90591	2.61944	2.91734	2.52484
MYO1H	4.13651	2.36013	2.66867	2.61957	2.70195	2.57019	2.60633	2.88504	2.64747	2.71386	2.57799	2.61083	2.3742	2.82347	2.46508	2.69137	2.69137	2.53792	2.28603	2.5553	2.67267	2.66935	2.97115	2.64848	2.55749	2.55373	2.45964	2.72592	2.53341	2.63789	2.56664	2.47027	2.70835	2.74757	2.51422	2.35379	2.64848	2.35128	2.72532	2.51313	2.45906	2.71081
ASB14	3.21091	3.26705	3.35667	3.34872	3.57723	3.16199	3.10853	3.1955	2.8364	3.12856	3.42057	3.20628	3.38553	3.28827	2.93733	3.87073	3.29181	3.49567	3.16137	3.13643	2.98496	3.39933	3.82448	3.13686	3.04848	3.22729	3.46373	3.05092	3.0875	3.25359	3.14767	3.4185	3.53391	2.94524	3.47655	3.52668	3.35405	3.3136	3.20502	3.03246	3.17566	3.52533
RPTN	2.3592	2.22043	2.36056	2.62173	2.57136	2.03227	2.41316	2.55574	2.16102	2.28238	2.35117	2.45118	2.45713	2.28808	2.28689	2.54812	2.34114	2.40109	2.53602	2.38852	2.31824	2.30921	2.69019	2.41632	2.21517	2.40439	2.39737	2.37601	2.14895	2.28084	2.29663	2.14371	2.32268	2.40892	2.29585	2.46849	2.47118	2.30356	2.47977	2.37736	2.57783	2.27183
LINC00269	4.91617	4.6591	4.67085	4.5534	5.58434	4.27368	4.45872	5.09143	4.44297	4.54843	4.53639	4.28695	4.70085	4.59929	4.22324	4.85351	4.69914	4.46156	4.53746	4.53562	4.5993	4.57233	4.97214	4.42031	4.26566	4.59692	4.66218	4.45255	4.46007	4.51534	4.41274	4.53322	4.48815	4.5358	4.27045	4.78743	4.37024	4.53562	4.65405	4.2099	4.76699	4.39149
STPG4	2.7575	3.05294	2.66584	2.79938	3.17786	2.56537	2.75477	2.49429	3.54556	2.41279	2.88189	2.90921	2.64918	2.63263	2.80164	2.98775	2.72336	2.47079	2.65466	2.93313	2.93044	2.83292	2.95535	2.6689	2.58418	2.95647	2.74911	2.78754	2.78344	2.46822	2.80036	2.93526	2.89269	3.02514	2.80843	2.90686	2.79999	3.03896	3.12512	2.62498	2.71143	2.75644
FAM9B	2.41722	2.13176	2.33592	2.59033	2.6322	2.19817	2.24844	2.55958	2.07564	2.44359	2.1723	2.20431	2.25861	2.23397	2.08877	2.25466	2.27051	1.95963	2.40282	2.21929	2.00355	2.23178	2.23893	2.34961	2.08395	2.32843	2.28638	2.11222	2.20035	2.20304	2.13697	2.2067	2.45147	2.22393	2.21266	2.15491	2.16673	2.26569	2.75497	2.22772	2.43938	2.07729
FLJ40288	5.34502	5.30189	5.28693	5.3904	5.46044	5.39576	5.03144	5.3797	5.38771	5.31666	5.55194	5.02867	5.35388	5.32409	5.40722	5.53596	5.87898	5.21183	5.53226	5.46032	5.34851	5.49885	5.63606	5.51273	5.04642	5.41657	5.36115	5.54952	5.07032	5.63161	5.14797	5.18273	5.23309	4.95996	5.42241	5.59927	5.14729	5.36994	5.67207	5.09408	5.46509	5.12668
CES5A	2.55639	2.53626	2.31818	2.65764	2.60317	2.59443	2.28717	2.6792	2.63934	2.57247	2.67254	2.48032	2.65291	2.72259	2.67179	2.81024	2.56222	2.4322	2.42094	2.56032	2.40609	2.57989	2.77547	2.40257	2.61977	2.65982	2.39378	2.49514	2.52896	2.49123	2.5373	2.79447	2.88039	2.72819	2.87082	2.56412	2.40991	2.7049	2.66157	2.36575	2.50643	2.8608
CFAP47	3.18306	3.12219	3.2643	2.94242	3.60369	2.99864	3.31052	3.30799	3.23327	3.56626	3.26952	3.08979	3.18826	3.41319	2.98707	3.33771	3.60314	3.17543	3.05095	3.42426	2.94417	3.38453	3.32907	3.01942	3.21498	3.42064	3.37352	3.06249	3.33126	3.04695	3.14308	3.27095	3.35099	3.43244	3.36536	3.33171	3.19175	3.20112	3.45877	3.13257	3.3155	3.07742
SLC35G3	2.15973	2.25912	2.363	2.51656	2.47366	2.2683	2.21679	2.24389	2.68977	2.21552	2.52301	2.22307	2.39315	2.07459	2.0229	2.30323	2.39208	2.21561	2.26197	2.34221	2.22967	2.26731	2.40249	2.30981	2.31815	2.40912	2.34655	2.42855	2.2242	2.50146	2.17024	2.33977	2.16694	2.24455	2.29013	2.15936	2.35519	2.17342	2.37188	2.2108	2.19598	2.35967
LINC01931	2.33334	2.30134	2.46228	2.74158	2.58806	2.26337	2.35313	2.33139	2.30682	2.44362	2.2407	2.12855	2.42317	2.47337	2.00961	2.23153	2.44193	2.39642	2.13722	2.20201	2.34459	2.39098	2.48414	2.22321	2.12513	2.48887	2.09619	2.28498	2.31675	2.11555	2.0519	2.39409	2.72563	2.22404	2.20851	2.44985	2.11555	2.31791	2.81419	2.27455	2.77523	2.15476
LOC100288966	2.04691	2.00422	2.10624	2.05835	2.17431	2.17664	1.99959	2.04233	2.00201	1.91028	1.98014	1.90828	1.99917	1.87118	1.98302	2.04134	1.71769	2.25469	2.03554	1.92852	2.02892	1.92031	1.93082	1.91331	1.95839	2.17408	1.92404	1.89249	2.16447	1.86728	2.01906	2.18014	1.98953	1.80358	2.0048	2.15474	2.02992	1.99195	1.84587	2.03834	1.84039	2.27705
KIRREL3-AS3	2.82156	2.97306	3.03528	3.06026	2.9084	2.67025	2.89809	2.91836	3.00278	3.32594	3.06333	2.71446	3.10977	3.16606	2.79456	3.1824	3.02116	2.90713	2.88053	2.86499	2.68528	3.15533	3.16679	2.89589	2.71454	2.69785	2.58798	2.92615	2.72696	2.92569	2.82907	3.12005	2.56558	2.62287	3.28162	3.01982	2.76282	2.87396	3.1633	2.74224	3.08319	2.82736
TMEM145	3.27121	3.51635	3.42742	3.68354	4.18277	3.22423	3.57075	3.22521	3.36302	3.5689	3.54169	3.42846	3.18826	3.40354	3.44281	3.46889	3.57931	3.22967	3.34639	3.53928	3.55477	3.3512	3.48691	3.4847	3.33785	3.35466	3.12208	3.12737	3.07827	3.28396	3.39245	3.53928	3.46411	3.32183	3.47992	3.56574	3.40736	3.84421	3.39397	3.66865	3.7077	3.03451
C15orf32	2.21165	1.9521	2.12672	2.17677	2.14116	1.90988	2.04454	2.55324	1.89567	2.56796	2.08763	2.29933	2.20794	2.48045	2.22218	2.1311	2.3023	2.15234	2.23686	2.10387	1.89008	2.1373	2.40323	2.00731	1.92335	1.95642	2.11695	2.09752	2.08376	2.15939	2.08476	2.0032	2.30982	2.1377	2.04492	2.13975	2.12788	2.01384	2.27393	2.04034	2.23559	2.2675
TSGA10IP	4.47695	4.47209	4.55803	4.59158	4.63015	4.10706	4.1817	4.42564	4.27073	4.23193	4.90622	4.21334	4.58837	4.38706	4.14709	4.38787	4.41275	4.31712	4.34588	4.57094	4.42601	4.76534	4.20732	4.04042	4.28136	4.34588	4.37832	4.01137	4.26817	4.41553	4.26264	4.43441	4.50697	4.26718	4.3455	4.25158	4.60029	4.5313	4.72594	3.99488	4.5619	4.40218
LINC00477	2.3762	2.57249	2.27319	2.50144	2.35694	2.26314	2.21878	2.3146	2.17639	2.28938	2.25405	2.26623	2.43197	2.37071	2.15234	2.64514	2.51259	2.26431	2.30671	2.14958	2.4563	2.33944	2.49437	2.37324	2.23099	2.44986	2.2136	2.20975	2.13982	2.26088	2.35749	2.25785	2.19921	2.28704	2.32103	2.45922	2.14234	2.22605	2.34876	2.08747	2.41787	2.06156
CCDC140	2.94368	2.71498	2.79062	2.60541	2.96638	2.44004	2.64582	2.90399	2.76052	2.88451	2.78622	2.70867	2.78898	2.73788	2.81276	2.83074	2.7747	2.63256	2.83637	2.873	2.80806	2.79242	3.28142	2.712	2.61697	2.77942	2.85093	2.56233	2.82736	2.69404	2.90269	2.77018	2.79391	2.69404	2.99758	2.79619	2.74463	2.57563	3.08182	2.66936	2.91191	3.11163
C17orf78	2.7905	2.54847	2.91431	2.87701	3.15176	2.86459	2.69583	2.67571	2.94541	2.8405	3.18562	2.62597	2.69804	2.88163	2.53245	2.97445	2.56455	2.79356	2.81903	2.79415	2.71407	2.92496	3.11872	3.98046	2.94924	2.79052	2.42801	2.85496	2.78217	6.86845	2.79411	3.02582	2.73525	2.73101	2.65938	2.69015	2.71858	2.472	2.83117	2.78343	2.87869	2.71544
TEKT5	4.2683	3.94433	4.15108	4.13788	4.06615	3.84451	4.71086	3.90006	4.10747	4.33957	4.2266	4.10222	4.3153	4.58929	4.10601	4.28369	4.01664	3.95568	3.81425	3.90775	4.02779	4.07065	5.08187	4.11334	3.93757	4.37901	4.13429	3.94802	3.91951	4.0778	4.02229	3.97232	4.61704	4.15604	3.89398	3.97995	4.06613	4.06682	4.32199	3.93852	4.35143	4.15063
LINC00615	2.16414	2.22026	2.15085	2.18389	2.62658	1.91501	2.07159	2.05536	2.38016	2.13968	2.28062	2.07656	2.71835	2.0828	2.11166	2.7617	2.4909	2.28672	2.43438	2.04637	2.06156	2.5002	2.25282	2.0054	2.14632	2.14256	2.16341	2.17943	1.93686	2.06339	2.2971	2.304	2.22841	2.1964	2.08794	2.2227	1.93179	2.14849	2.37473	2.09019	2.0999	2.14632
SERPINA9	5.1843	5.51191	5.39494	5.64393	5.92174	5.3862	5.18778	5.71831	5.03891	5.42726	5.60128	5.11085	5.43197	5.37309	5.42956	5.40494	5.52447	5.5469	5.62725	5.43673	5.11564	5.82721	5.6792	5.62842	5.24124	5.92734	5.10711	5.34108	5.13578	5.50916	5.14809	5.67733	5.77116	5.50794	5.61525	5.48303	5.29893	5.35413	5.82065	5.12411	5.59654	5.56118
MRGPRX4	2.90836	2.89951	2.94452	2.93808	2.93219	2.77122	2.64078	2.90182	2.78058	2.86413	2.8851	2.69113	2.80454	2.97095	2.90165	2.99357	2.72283	2.77903	2.97707	2.97813	2.92399	2.98633	3.04768	2.90078	2.85656	2.55261	2.97966	2.84683	3.03528	2.91828	2.9327	2.93385	3.08409	3.13028	2.89297	3.01423	2.85335	2.88144	2.86242	2.73586	2.8554	2.91733
A2ML1	3.67831	3.5929	3.37443	3.535	3.71842	3.28352	3.12591	3.75	3.64278	3.42215	3.36451	3.36062	3.52146	3.25064	3.58336	3.50508	3.43481	3.36367	3.53309	3.63292	3.33722	3.72695	3.9445	3.50508	3.48208	3.34692	3.87722	3.47032	3.10731	3.56487	3.52269	3.57115	3.47008	3.36926	3.65433	3.53487	3.41402	3.44102	3.44401	3.198	3.44517	3.12743
CPO	2.87644	2.72128	3.08984	2.9403	3.1684	2.74037	2.8672	2.98598	2.71325	2.86492	3.08492	2.71105	2.98383	3.17126	2.99781	2.84494	2.99065	2.77701	2.92763	2.93049	2.75601	3.0074	3.05437	2.86952	2.86939	3.24303	2.7954	2.47783	2.63811	3.02002	2.91364	2.6525	3.22423	2.88248	2.67163	3.12074	2.84124	2.78286	3.30879	2.62498	2.98937	2.71992
GPR6	3.55717	3.85546	4.04887	3.52025	3.68022	3.48958	3.70691	3.72439	3.56445	3.77519	4.06908	3.72716	3.23087	3.48893	3.54316	4.1718	4.12653	3.95324	3.54343	3.69356	3.49722	3.98823	3.89108	3.89643	3.42898	3.68663	3.79371	3.60791	3.73656	3.74881	3.5894	3.8251	3.61232	3.91038	3.50874	3.46388	3.58095	3.93092	3.20019	3.73558	3.73973	3.35609
HOXC12	3.14756	2.65077	3.2355	3.0582	3.0631	2.42509	2.93973	2.96233	2.99085	2.85748	2.98956	2.85115	2.95987	3.01444	2.94796	2.96717	2.99567	2.98168	2.86052	2.939	2.93875	2.92156	3.27539	2.82129	2.48298	3.00204	2.93657	2.83373	2.55039	3.06099	2.8538	2.9708	3.00871	3.01147	2.84504	3.05413	3.30238	2.79791	3.05158	2.57128	3.37202	2.76333
FERD3L	3.75571	4.11761	3.60489	4.0084	3.96635	3.35617	3.60475	3.45135	3.93864	3.49366	3.71473	3.5808	3.57974	3.92221	3.64408	3.64343	3.73414	3.647	3.31109	3.56344	3.55845	3.74804	3.74134	3.69761	3.59276	3.49015	3.74004	3.4336	3.52596	3.60122	3.54265	3.85581	3.81928	3.56549	3.62394	3.62766	4.07702	3.26326	3.47622	3.32368	3.74714	3.51266
LINC00314	2.02435	2.08303	2.05089	2.11562	2.07385	2.07719	1.8474	1.93346	2.07635	2.12055	2.084	2.04282	2.15981	1.92872	1.98606	2.12242	2.05879	1.9019	2.12803	2.02994	2.01795	1.94836	1.95764	1.95859	2.17226	2.12701	2.02197	2.04027	1.87659	2.20228	2.00071	2.04567	2.09392	2.08689	2.03263	1.92979	2.2113	2.04671	2.16664	2.00427	2.0399	2.00663
NLRP14	2.98586	3.33513	3.4988	3.44619	3.398	3.0401	3.28668	3.32682	3.00595	3.21069	3.39944	3.26198	3.10833	3.01255	3.1829	3.12186	3.43619	3.1287	3.27625	3.14805	2.92236	3.43208	3.36462	3.56181	2.92191	3.18237	3.09057	3.50912	3.37003	3.18359	2.9989	3.25256	3.51863	3.02287	3.14969	3.40691	3.41117	2.99748	2.9591	3.1047	3.35752	3.14583
NLRP13	3.82427	4.01106	3.82686	3.61067	4.24801	3.5093	3.64373	3.85003	3.82086	4.24183	4.06979	3.58854	4.37726	3.77863	3.78782	4.06525	4.23632	3.89849	3.84117	4.01983	3.71502	4.0761	3.98069	3.87175	3.77191	3.7743	3.77672	3.99648	3.77533	3.62181	3.95876	3.81436	3.90174	3.93794	4.03598	4.1635	3.6434	3.85873	3.8548	3.6339	3.47606	3.87723
NLRP8	3.30755	3.17265	3.29431	3.05891	3.43734	2.89737	3.04673	3.53082	3.17828	3.25559	3.6215	3.17648	3.13798	2.97593	3.01807	3.22733	3.4298	3.06264	3.26124	3.23482	3.08533	3.27449	3.30082	3.24516	3.15368	3.14118	3.15247	2.94886	3.21335	3.05238	3.12708	3.13412	3.41019	3.19743	3.43702	3.24422	3.09631	3.1851	3.48885	2.99302	3.10801	3.25733
NLRP9	3.00301	3.16658	2.94733	2.69864	3.61007	2.78447	2.91231	2.9782	2.986	2.86754	2.70849	2.94162	3.23148	3.07547	2.98453	3.46988	3.03528	2.8037	2.91199	3.04317	2.96265	3.00167	3.13455	3.09895	2.9353	3.03844	3.05772	2.72304	3.00567	2.96753	2.69149	3.06141	2.86605	2.9353	2.97152	2.93192	3.11957	2.73606	2.69273	2.69273	2.95718	2.9316
TAS1R2	2.76391	2.86674	2.57669	2.66097	3.18055	2.82172	2.52789	3.05484	2.77109	3.0338	2.96399	2.5972	2.85289	3.04937	2.86163	2.82962	2.63072	2.67862	2.97835	2.88648	2.91168	2.95959	3.42123	2.84571	2.60796	2.53788	2.64776	2.80016	2.69163	2.60609	2.51519	2.84983	2.96866	2.87171	2.9082	3.16315	2.81844	2.98338	3.08033	2.96893	2.99983	2.87426
ZNF341	4.96064	4.89162	4.94254	4.65721	4.90685	4.57246	4.76153	4.97501	4.80623	5.06542	4.75334	4.62702	4.88403	4.71168	4.8376	4.912	4.85154	4.94991	4.9658	4.72982	4.84041	4.79557	4.73984	4.79251	4.73694	4.70136	5.01984	5.0953	4.66386	4.81	4.7265	5.10934	4.6004	5.06344	4.34425	5.21336	4.85449	4.70772	4.51465	4.74962	4.85919	4.80648
NLRP10	2.52538	2.74442	2.77692	2.67667	2.81772	2.49844	2.53353	2.8851	2.66392	2.67414	2.46992	2.47023	2.74211	2.63753	2.68993	2.74637	2.6621	2.3156	2.75228	2.39775	2.50381	2.88865	2.71383	2.51876	2.3629	2.60688	2.59685	2.70745	2.5835	2.91637	2.55831	2.54553	2.51973	2.77217	2.45118	2.65127	2.7776	2.68323	2.76211	2.6195	2.76477	2.67209
COX1	12.797	12.9009	12.9566	12.9986	12.5545	13.0698	13.0913	12.9779	12.5802	12.7499	13.1303	12.8366	12.9483	13.3114	12.5018	13.0524	12.8739	12.8575	13.1956	12.7307	13.041	13.0514	13.2853	13.0338	12.8247	13.1544	12.5986	13.0476	12.8948	13.2453	12.8587	12.9202	12.9295	12.6352	12.9716	13.0693	13.1475	12.9215	13.3429	12.9482	12.9877	13.177
KRT74	3.306	3.44191	3.83124	3.77399	3.94931	3.52051	3.46932	3.72212	3.47534	3.75574	3.69867	3.49169	3.56328	3.76697	3.44893	3.66592	3.81331	3.42946	3.59383	3.49224	3.75981	3.71765	3.80268	3.75046	3.30634	3.52994	3.67887	3.64297	3.76024	3.48863	3.2764	3.56469	3.62281	3.76633	3.66031	3.80259	4.29085	3.60836	3.74451	3.54018	3.9442	3.5415
LMX1A	3.02101	2.97208	2.45781	2.61569	3.136	2.57345	2.83475	2.62005	2.80837	2.74641	3.069	2.86997	2.94921	3.0888	2.49534	3.32773	3.10862	2.54361	2.73262	2.8726	2.68332	2.82119	2.99416	2.7666	2.41489	2.83475	2.62499	2.74763	2.61037	2.86413	2.68259	2.78477	2.8262	2.67912	2.84262	2.87217	2.54132	2.7936	3.10961	2.64322	2.73957	2.7757
GPR101	3.06907	3.1293	3.71441	3.77765	4.21397	3.30323	3.69784	3.31672	3.67271	3.73795	3.47628	3.56677	3.4844	3.88766	3.62597	4.3028	4.01714	3.62784	3.61422	3.80594	3.49197	3.93569	4.13695	3.60342	3.18655	3.68065	3.94391	3.18854	3.48952	3.37521	3.56198	3.61793	3.34031	3.44909	3.46339	3.49706	3.61343	3.26104	4.09726	3.45405	3.64799	3.18743
VN1R2	2.27628	2.57249	2.4739	3.10463	2.72169	2.45009	2.46091	2.52525	2.33879	2.68097	2.354	2.23367	3.0355	2.77999	2.31366	2.47659	2.58275	2.4713	2.3253	2.52611	2.37854	2.65078	2.46482	2.4184	2.49297	2.50801	2.67506	2.50497	2.42243	2.47954	2.31195	2.69708	2.96599	2.36017	2.62312	2.8855	2.5977	2.48182	2.76527	2.43614	2.62994	2.53107
VN1R5	3.0839	2.6266	3.04062	3.23958	2.94762	3.14434	2.70927	3.19515	2.96439	2.81564	2.83689	2.69718	3.01036	2.76726	3.03119	2.78894	3.08165	2.42077	2.98846	2.68799	2.88728	2.86612	2.86878	2.73124	2.81633	3.12608	2.79786	2.64852	2.83614	2.74408	2.63598	2.80238	2.72563	2.87041	3.0631	2.97774	2.74836	2.66123	2.73408	2.68806	2.76315	2.88921
ND2	13.0557	12.9353	13.1557	13.3029	12.7826	13.1929	12.9481	13.08	12.8279	12.6381	13.2189	12.9983	13.3365	13.5396	12.6611	13.1541	13.133	12.9589	13.107	13.0768	13.1444	12.8814	13.3512	12.9762	13.05	13.4658	12.8117	13.0723	13.2032	13.3658	12.9432	13.2016	13.2485	12.725	13.1883	13.0979	13.3018	13.1071	13.3495	12.3715	13.3388	13.261
TAAR8	3.29038	3.09839	3.15699	3.22742	3.36484	2.89723	3.17937	3.15206	3.43361	3.28034	3.27965	3.23218	3.1132	3.22749	3.06456	3.12593	3.34006	2.98616	2.8705	3.09563	2.84983	3.43835	3.02527	3.18025	2.80889	3.16431	2.94098	3.2088	2.86725	3.11917	2.96588	3.04594	3.34749	3.0023	2.94895	2.85165	3.00965	2.85487	3.4303	3.02492	2.84098	2.92351
TAS2R39	2.31604	2.41737	2.56796	2.75442	2.66747	2.52646	2.60585	2.92054	2.97708	2.68176	2.61729	2.69787	2.48887	2.36932	2.73085	2.6174	3.13028	2.32904	2.36995	2.92197	2.32676	2.58689	2.70503	2.71514	2.63966	2.52136	2.43605	2.65869	2.75675	2.65983	2.6696	2.6174	2.6072	2.60075	2.66413	2.64343	2.4043	2.64523	2.85764	2.47014	2.96849	2.6345
TAS2R38	2.62452	2.65077	3.03528	2.87553	3.07884	2.75108	2.91313	3.31996	2.84216	2.69804	3.04845	2.97512	2.70959	2.71677	2.75979	2.95357	3.1497	2.62644	2.9485	2.88143	2.58925	2.94836	3.28142	2.75198	2.6402	2.75343	2.72025	2.76507	2.83927	2.7366	2.37515	2.69899	3.09127	2.74779	2.95452	2.79959	2.79514	2.74176	2.89334	2.58644	2.76978	2.77137
TAS2R40	2.31686	2.3858	2.19824	2.36172	2.37404	2.2472	2.11697	2.21937	2.32095	2.26892	2.1075	2.26671	2.39702	2.40316	2.16707	2.32184	2.47087	2.07377	2.13756	2.28995	2.18828	2.22067	2.20706	2.25461	2.25081	2.25878	2.35893	2.08162	2.25491	2.16526	2.28556	2.23306	2.15647	2.30766	2.34305	2.30766	2.04263	2.31364	2.55323	2.12306	2.37635	2.12762
TAS2R41	2.95143	3.43143	3.2643	3.45746	3.11835	2.9613	3.05293	3.52219	3.14076	2.97939	3.05787	3.307	3.19317	3.04842	3.12936	3.04352	3.71967	3.37049	3.28664	3.18724	2.964	3.48941	3.18865	3.02005	3.14065	3.12678	3.37173	3.03075	2.88661	3.17621	3.03642	3.49275	3.18119	3.12544	3.18119	3.42404	3.11414	3.19854	3.16856	3.28132	3.12129	3.23247
VN1R4	2.72007	2.50736	2.69012	3.00056	2.90301	2.67345	2.59125	2.65744	2.8435	2.72875	2.68571	2.61695	2.89635	2.61341	2.69788	2.63338	2.75623	2.63668	2.60809	2.67859	2.46347	2.64235	2.60301	2.77244	2.71264	2.91244	2.49555	2.60178	2.68571	2.4404	2.5145	2.46766	2.89472	2.69098	2.95414	2.8518	2.65192	2.80615	2.81955	2.74224	2.93086	2.80388
TAS2R50	2.00567	2.41585	2.38384	2.35233	2.26109	2.20228	2.47483	2.38917	2.41223	2.15043	2.30266	2.15744	2.21747	2.20206	2.39539	2.38472	2.38984	2.20938	2.22869	2.27058	2.2459	2.09342	2.39852	2.26686	2.14343	2.37094	2.36163	2.53068	2.10464	2.32828	2.30403	2.30081	2.58182	2.22551	1.90001	2.26966	2.09655	2.12072	2.38427	2.23545	2.56373	2.36795
PIANP	4.10828	4.16107	4.48035	4.58119	4.87749	4.08473	4.38775	4.42754	4.65523	4.60499	4.23095	4.29135	4.44632	4.40725	4.28847	4.52974	4.48375	4.14473	4.60137	4.429	3.97562	4.61392	4.52974	4.47189	4.42636	4.47189	4.57557	4.3663	4.18053	4.25529	4.30877	4.29743	4.48949	4.42582	4.51903	4.30773	4.89761	4.41419	4.43185	4.41571	4.83785	4.41346
ATP6	13.4282	13.4467	13.5865	13.6231	13.2593	13.4623	13.498	13.5865	13.2555	13.5828	13.5953	13.5396	13.6741	13.8426	13.1224	13.6321	13.6296	13.4482	13.5377	13.4057	13.567	13.5865	13.5865	13.436	13.5505	13.8074	13.2286	13.5865	13.5342	13.5561	13.3487	13.6002	13.6092	13.4856	13.6169	13.5261	13.7076	13.4843	13.7187	13.2026	13.7047	13.555
COX2	13.2592	13.3307	13.3331	13.6202	13.1585	13.4138	13.181	13.5002	13.0599	13.4286	13.4321	13.3497	13.5038	13.5908	12.9381	13.4328	13.4252	13.3182	13.305	13.2192	13.2566	13.2327	13.571	13.186	13.3325	13.5937	13.032	13.3775	13.3191	13.4622	13.2502	13.426	13.5072	13.3751	13.4793	13.3829	13.5731	13.4432	13.6321	12.9296	13.589	13.4772
IFNE	2.29991	2.25924	2.18545	2.30142	2.21691	2.19512	2.3424	2.39086	2.20026	2.42382	2.61379	2.23011	2.64767	2.27174	2.14288	2.46764	2.63512	2.43365	1.95968	2.589	2.26416	2.49818	2.43062	2.53478	2.07496	2.11691	2.42868	2.40885	2.32577	2.14437	2.14991	2.39409	2.41675	2.28241	2.17964	2.12728	2.3254	2.37564	2.738	2.25886	2.48872	2.43901
ND6	5.97173	5.82404	5.64848	6.40228	6.39271	7.12933	7.80222	6.80992	5.87727	7.09916	5.07222	5.19034	6.14243	5.09181	6.39243	5.66888	7.19404	5.89881	5.53646	5.65753	5.49473	6.56552	4.534	5.82576	4.91662	5.72347	6.11199	5.3593	5.21286	5.68181	5.92943	6.12966	6.33202	6.77269	7.24542	6.44657	4.94093	5.55952	6.6131	5.08996	5.41627	5.96733
SREK1IP1	7.10343	7.29549	7.61266	6.29241	7.55512	7.65422	7.63924	7.14839	7.94941	7.4496	7.23906	7.16562	7.60544	6.59547	6.83117	7.28072	7.65932	7.2708	7.16935	7.44451	6.78715	7.2876	6.59013	7.16476	6.83139	7.36307	7.81478	6.77656	7.6537	7.0063	6.51186	7.2238	7.77914	7.2693	7.53189	7.6069	6.73701	7.33102	8.12552	7.65672	7.45244	7.944
THRSP	3.41818	3.4849	3.10407	3.21942	3.49199	3.01604	3.29409	3.37674	3.25121	3.33619	3.56863	2.92945	3.44	3.90421	3.01723	3.63375	3.40736	3.27983	3.46943	3.11885	3.17245	3.37081	3.84547	3.13394	2.96074	3.75751	3.33663	3.41677	3.08998	3.29406	3.06092	3.11582	3.44787	3.0791	2.81757	3.32478	3.44385	3.35169	3.44742	2.9308	3.59817	2.90118
FBXL19-AS1	3.66985	3.44512	3.62833	3.71751	4.18529	3.52682	3.75683	3.7257	3.77246	3.68018	3.44619	3.45613	3.82396	3.63638	3.57119	3.64408	3.6718	3.49849	3.4974	3.2393	3.67364	3.66702	3.76464	3.60563	3.62634	3.86355	3.53927	3.39817	3.37401	3.37686	3.27213	3.53165	3.78466	3.61727	3.52817	3.5553	3.7239	3.53461	4.03438	3.40242	3.6733	3.53473
BCRP3	3.35115	3.52291	3.21317	3.42294	3.89989	3.5819	3.22768	3.62237	3.32296	3.60662	3.74126	3.1958	3.3577	3.36675	3.43761	3.63523	3.67228	3.29049	3.60204	3.30281	3.08779	3.50725	3.40243	3.53276	3.30823	3.22109	3.40731	3.39069	3.45859	3.64372	3.34983	3.45565	3.76214	3.34255	3.26378	3.65964	3.49055	3.4339	3.45191	3.41935	3.15596	3.62924
INSL3	3.82838	4.08894	4.16465	3.84093	4.58912	3.97107	4.14667	4.17998	4.38655	3.99887	4.34155	3.80773	4.16245	3.92904	4.06629	4.27323	4.0572	3.95319	4.12366	4.11873	3.97841	4.4341	4.41727	4.0598	3.63596	4.0751	4.11746	4.07351	3.9464	3.79927	3.83453	4.14547	4.08326	3.97222	4.0431	4.08509	3.95152	3.92248	3.85309	3.67457	4.19535	4.00183
TMIE	3.79879	3.92044	4.06648	4.09392	3.78349	3.69271	4.0392	3.62311	3.80506	3.90407	4.1867	3.76681	3.82746	4.38705	3.61894	4.16186	3.85936	4.05996	4.03033	3.89354	3.72759	3.84693	4.28761	3.84035	3.57157	3.99178	3.87878	4.044	3.66919	3.71995	3.60026	4.0892	4.00146	3.75355	3.81895	3.87568	4.22057	3.58559	4.07217	3.40201	3.88222	3.86062
MUCL1	3.45205	4.42857	3.68434	4.70379	4.15783	3.4303	3.65926	5.98356	3.29566	3.48277	3.67874	3.54893	3.67499	3.58159	4.29925	4.03724	3.85568	3.62599	5.52895	3.8984	3.63092	3.93601	3.83592	4.64973	3.7741	4.30131	3.90568	4.12765	3.59455	3.69503	3.44459	4.99937	3.63613	3.46238	3.75561	3.44619	3.66336	3.76328	3.6262	3.47956	3.55543	4.7248
ABCA13	2.06442	1.90919	2.03046	1.80349	1.9761	1.90919	2.18029	1.99626	2.05814	1.8087	2.04974	1.88322	2.14867	1.96414	2.20663	2.02651	2.75214	2.03723	2.07378	2.18534	1.92994	2.43974	1.83879	1.98739	1.80362	2.00946	2.5157	1.94463	1.92157	1.94694	2.02582	1.89725	2.03342	1.99617	1.92397	1.92166	1.89849	1.95874	1.84942	2.16329	1.87668	1.83777
LINC00189	2.21841	2.16487	2.34292	2.13024	2.17404	2.36024	2.2509	2.26777	2.43275	2.12537	2.22848	2.09366	2.31075	2.41381	2.40516	2.25576	2.21059	2.26048	2.17741	2.24335	2.11525	2.36533	2.08921	2.21335	2.03164	2.01531	2.2562	2.08428	2.03723	2.28976	2.19135	2.80069	2.30263	2.26747	2.04658	2.20956	2.18377	2.19619	2.3997	2.17938	2.319	2.12013
KLHL35	4.07193	4.2308	4.28334	4.44066	4.23486	4.13786	4.04219	3.87959	4.11302	4.4206	4.36355	3.89813	4.31181	6.48111	4.36672	4.31606	3.78548	3.93373	4.08158	4.01068	4.76153	3.81444	4.76737	4.93005	4.42577	4.31175	4.37013	4.63597	4.01068	4.43168	4.11232	4.20933	3.84825	4.83317	4.38987	4.27849	4.84114	4.43758	4.20209	4.29592	4.57341	4.04074
ZNF354B	3.29503	3.37795	3.85277	3.44619	2.7813	2.92061	2.93171	3.06963	2.56373	2.77477	3.42561	3.11937	3.58978	3.27942	3.17078	3.17732	3.28072	3.1184	2.93203	3.41989	2.76403	3.09581	3.52105	2.63326	2.97125	3.23291	3.15904	3.71225	3.55296	2.98159	3.02758	3.39935	3.97399	2.56373	2.89782	3.3707	3.06139	3.47878	3.50217	2.99072	3.33694	3.4303
LINC01198	2.47006	2.39337	2.36744	2.63569	2.60337	2.18073	2.24243	2.35803	2.35811	2.53809	2.43151	2.45626	2.71434	2.71608	2.29813	2.50031	2.37495	2.27266	2.47253	2.20104	2.30096	2.18287	2.31979	2.20228	2.40415	2.28484	2.42657	2.29233	2.19472	2.43688	2.16513	2.35818	2.52967	2.37882	2.3633	2.30922	2.15207	2.40096	2.96001	2.24852	2.75077	2.3384
FSIP1	2.35797	2.36462	2.30031	2.64474	2.75416	2.26862	2.49948	2.42409	2.64788	2.56145	2.56116	2.20941	2.50075	2.48045	2.20663	2.6872	2.74715	2.4858	2.40445	2.43853	5.93196	2.39395	2.67381	2.30812	2.24064	2.27812	3.06311	2.59545	2.22145	2.7666	2.42563	2.62046	2.22746	6.81607	2.08906	2.28143	2.25635	2.31062	2.21762	2.41755	2.35719	2.24562
FAM71B	3.27932	3.24223	3.73594	3.3156	3.6563	3.03879	3.0447	3.50403	3.09994	3.24157	3.73936	2.94561	3.06796	3.57077	3.02472	3.32094	3.4176	3.16529	3.62472	3.15458	3.09646	3.34875	3.59611	3.38067	3.20828	3.49327	2.94836	3.08687	3.29574	3.41997	3.45898	3.47575	3.6414	3.49078	3.53112	3.42161	3.43097	3.39505	3.54517	3.1526	3.50293	3.06254
CABCOCO1	2.1325	2.01008	2.07252	2.02301	2.47202	2.03915	2.04048	1.98962	2.0937	1.96724	2.19444	1.78546	1.92353	2.00527	2.02583	2.27391	2.18658	2.08215	2.09589	1.9535	2.10015	1.90884	1.92755	2.03507	2.02669	1.84219	2.10934	1.94966	1.8089	1.87659	2.03465	2.39997	2.1817	2.1821	2.16141	1.94169	2.18167	1.87793	2.30634	2.13459	2.19996	1.79892
WEE2-AS1	2.67862	2.43688	2.58458	2.43328	2.86841	2.78618	2.40095	2.90267	2.73614	2.48514	2.41698	2.71164	2.99362	2.66624	2.78	2.49053	2.4909	2.66673	2.59073	2.53892	2.85971	2.69168	2.62173	3.00255	2.60702	2.96773	2.67144	2.81196	2.91287	2.7666	2.69457	2.68454	2.91142	2.60395	2.69718	2.61182	2.74127	2.76392	2.67699	2.64115	2.42782	2.73143
TCTEX1D1	2.46542	2.22472	2.46655	2.53477	2.64621	2.15314	2.42656	2.57227	2.57808	2.46339	2.416	2.3486	2.38923	2.44715	2.54292	2.3471	2.3847	2.20132	2.37355	2.45868	2.28012	2.21471	2.58359	2.53663	2.68456	2.36524	2.29742	2.12396	2.25952	2.38966	2.36943	2.34565	2.48698	2.37291	2.29023	2.49712	2.25405	2.17949	2.50015	2.38986	2.33829	2.29133
TMCO5A	3.13203	3.39809	2.96865	2.94483	3.06938	3.17985	3.28539	3.20183	2.8768	2.68411	3.26059	3.0015	3.22029	3.41626	3.12431	3.07611	3.27717	3.07461	3.30183	3.13028	3.24127	3.32378	3.1565	3.11795	3.17481	3.44855	3.16852	3.47108	3.17554	3.1529	2.68693	3.30254	3.41419	3.2588	2.98325	3.15896	3.04598	3.1785	3.35492	2.85847	3.44195	3.13915
TSGA13	3.63328	3.02205	3.40151	3.42067	3.42122	3.36741	3.49022	3.46688	3.56009	3.6271	3.58039	3.06294	3.39599	3.81512	3.09857	3.43466	3.4928	3.20557	3.39018	3.44319	3.68399	3.65576	3.86916	3.57471	3.31388	3.46451	3.53762	3.36204	3.32766	3.42633	2.99637	3.54988	3.86977	3.50849	3.38883	3.44781	3.6459	3.3504	3.55865	3.24283	3.40567	3.28595
C9orf163	5.34711	5.02755	5.03666	5.55358	5.46702	4.81935	4.93912	5.20906	4.80464	5.09392	5.46734	4.79128	5.24895	5.11686	4.91195	5.10991	5.13837	4.86215	5.3412	4.98622	4.88468	4.96147	5.33279	4.70651	5.00406	5.44966	5.37853	5.05723	4.8396	5.25206	4.89602	5.28974	5.36835	5.37607	5.20197	5.25207	5.16349	5.03047	5.429	4.72128	5.20093	5.20812
SYNE3	3.26238	3.14759	3.18615	2.9785	3.55927	2.90245	3.22243	3.06903	3.12479	3.23119	2.95297	3.10814	3.60034	3.16728	3.20295	3.37173	3.57742	3.32855	3.2201	3.05852	2.82938	3.41552	3.18163	2.92346	3.06488	3.12981	3.19819	3.05536	2.88544	2.97093	2.80307	3.33702	3.46566	2.97549	3.25656	3.18144	3.34235	3.30177	3.04626	3.24879	3.20113	3.51096
CCDC141	2.26533	2.15257	2.02105	2.36157	2.17869	2.06914	2.20725	2.04324	2.47247	2.36157	2.22469	2.16014	2.00722	2.12745	2.11521	2.19114	2.327	2.26616	2.13502	2.00722	2.20066	1.95519	2.24808	2.05253	2.06011	2.23068	2.03473	2.16837	2.03723	2.1129	2.01787	2.37861	2.17096	2.08033	1.95518	1.967	2.18866	2.1477	2.26216	2.00269	2.05767	2.04186
HDX	2.40456	2.10508	2.22196	2.22179	2.20788	2.16877	2.27266	2.32952	2.43164	2.28399	2.12126	2.78465	2.12913	2.02012	2.22402	2.41149	2.13611	2.22376	2.44786	2.45699	1.96813	2.6423	2.1416	2.0932	2.33723	2.27395	1.99534	2.51153	2.02671	2.2737	2.12346	2.32964	2.57094	2.57877	2.30142	2.1577	2.20228	2.19573	2.58384	2.74224	2.05115	2.05273
SYT14	2.0901	2.08219	2.06732	2.32589	2.01105	2.03091	2.06732	2.08209	2.22118	2.09133	2.084	1.92577	2.20177	2.05245	1.94786	2.21313	2.31697	1.96196	2.03451	2.06732	2.0242	2.14077	2.05728	2.13424	2.13018	2.04878	2.19451	2.16633	2.25983	2.24879	1.93887	2.04324	2.08012	1.85613	2.07336	1.95697	1.87429	1.95182	1.99418	2.24776	1.99689	2.27683
TECTB	5.02717	4.79929	4.97346	4.60573	5.51361	5.13732	4.96374	5.20972	5.23981	4.95716	5.10593	4.73657	4.9806	4.85579	4.98013	5.36065	4.9956	4.92496	4.97583	4.85915	4.98172	5.22094	4.90466	4.9329	4.80759	5.41107	5.11251	5.0042	4.84689	4.92453	4.99386	5.04382	5.06491	4.79039	5.20167	5.10383	4.97782	4.91991	5.20499	4.67506	5.1279	5.06303
VWA3A	5.18162	5.14597	5.09074	5.52442	5.76193	5.25721	5.2698	5.3848	4.97942	5.53993	5.61217	4.78404	5.30063	5.32395	4.98873	5.41466	5.28674	4.96883	5.09689	4.94608	5.20606	5.43261	5.4861	5.24696	4.91795	5.36408	5.25855	5.28416	5.0335	5.05495	4.91959	5.12727	5.53934	5.15076	5.40679	5.34688	5.56731	5.17967	5.79504	4.9287	5.46482	5.1257
LINC00896	3.34006	3.32905	3.61924	3.81133	3.86655	3.33101	3.27749	3.5086	3.12447	3.29658	3.44501	3.05884	3.80132	3.3833	3.3109	3.55491	3.34421	3.25281	3.7198	3.16619	3.22114	3.82375	3.86855	3.33416	3.25309	3.3112	3.32756	3.28174	3.28046	3.40432	3.18854	3.38315	3.34732	2.8884	3.67372	3.56021	3.23038	3.58316	3.49075	3.15878	3.51296	3.55453
HUS1B	3.75998	3.55535	3.71777	3.79024	3.82971	3.50963	3.56303	3.58213	3.86011	3.61376	3.76273	3.69718	3.61299	3.70039	3.31578	3.52754	3.44653	3.79483	3.3227	3.43588	3.44916	3.4818	3.62647	3.94942	3.42221	3.85347	3.46094	4.00863	3.58544	3.68893	3.4818	3.39911	3.73524	3.58479	3.34806	3.3137	3.99237	3.45024	3.8827	3.56886	3.52672	3.70564
NPB	6.22493	6.03207	6.16704	6.14601	6.67647	6.00319	6.18017	6.44026	6.14111	6.29249	6.54203	5.76791	6.45159	6.07542	5.95645	6.38995	6.33655	6.47878	6.2491	5.98535	6.25052	6.55005	6.59013	6.15406	5.84091	6.4508	6.03881	6.18202	6.04146	6.0711	5.95333	6.3553	6.4493	6.15697	6.25392	6.05061	6.43409	6.00176	6.73934	5.70928	5.94588	6.05181
LRRIQ3	2.34291	2.35371	2.29408	2.57949	2.32114	2.25509	2.07908	2.65704	2.33879	2.47088	2.44943	2.26061	2.28574	2.2378	2.66676	2.34434	2.16452	2.36895	2.27929	2.31683	2.30428	2.32913	2.27086	2.27793	2.09353	2.41685	2.36869	2.27667	2.31566	2.42794	2.57022	2.2419	2.9108	2.38482	2.54545	2.53302	2.49904	2.35596	2.50817	2.26515	2.26522	2.29545
METTL6	4.6792	4.94945	4.47469	4.44858	3.9434	4.78322	4.47277	4.37144	5.04131	4.62469	3.53041	5.12967	4.74324	4.53581	5.01405	4.24477	4.39014	5.02773	4.76239	4.93814	5.44086	4.41268	4.69491	4.82212	4.65684	4.1709	4.30856	4.92633	4.53648	3.36512	4.80326	4.69374	3.8294	4.03236	4.28074	4.00709	4.37524	4.54086	3.7575	4.56983	4.3349	4.02882
ZNF791	7.84316	7.93054	8.21434	8.12392	7.57737	7.69247	8.02645	7.30579	7.95288	8.12747	7.38211	7.70175	7.99178	8.20342	8.33252	7.69481	6.97433	8.06631	7.70544	7.31359	8.09252	7.3088	6.88616	7.65004	7.36402	7.73083	7.94017	7.59389	7.93505	7.78553	8.48017	8.03252	8.265	7.80874	7.82097	8.09275	7.99519	8.17787	8.24246	7.7494	7.54412	8.07471
CHRM3	6.99864	5.12863	6.29791	6.40025	5.75982	6.42314	7.32171	5.55389	6.38208	6.56726	5.73868	4.32344	6.29854	6.50419	4.76233	4.69827	5.82987	6.33568	7.88184	7.72979	6.43672	7.21824	6.48425	6.42575	4.43426	5.78384	5.47009	7.39962	7.59046	7.28219	6.9991	6.32672	5.76308	6.83242	7.51026	5.56666	5.28712	6.37837	5.86493	5.42653	5.71732	6.72304
HTRA4	3.1625	2.56117	2.97344	3.15074	3.14877	2.57447	2.47231	2.89034	2.47192	3.19643	2.67278	2.67238	2.63061	3.76695	2.26966	2.65534	2.4793	2.73169	2.85971	2.92796	2.25287	3.29092	2.51836	3.0735	2.92178	3.91658	2.50648	2.93303	2.85046	2.94334	2.55574	3.11943	3.18853	3.25964	2.99021	3.65964	2.74581	3.41063	3.4303	2.7651	2.71724	2.89036
LINC00525	2.80706	3.02126	2.9969	2.93906	2.71642	2.71914	2.58095	2.68081	3.01279	3.25733	2.47649	2.81326	2.56921	2.3027	2.59576	2.33694	2.78135	2.82736	2.46033	3.12462	2.74304	2.89571	2.50158	3.48586	2.60148	2.29897	2.93777	2.93334	2.49098	3.65948	2.8614	5.00742	3.50077	2.6175	2.78476	3.537	2.71244	4.35114	2.71126	2.54335	2.53444	2.81714
PRPF38A	7.30525	7.764	7.90531	6.94334	7.40878	7.00296	6.72564	7.4663	7.95903	6.99077	7.58315	7.77353	7.40282	6.2173	7.96362	7.22881	7.23924	7.69177	8.06877	7.22933	7.3938	7.44698	7.73244	7.39886	6.70304	7.06765	8.0313	7.89626	7.66567	8.17397	7.64868	7.7791	6.89423	7.41724	6.46007	7.54155	7.23822	7.17482	6.92714	7.30185	7.6277	7.27687
FAM218A	2.48178	2.38902	1.98302	2.64304	2.6423	2.16141	2.27284	2.35036	2.31571	2.42971	2.38953	2.37894	2.43787	2.21681	2.2453	2.13959	2.37872	2.15234	2.28761	2.39085	2.64403	2.1774	2.34155	2.20228	2.18186	2.32447	2.56801	2.2804	2.24205	2.25899	2.358	2.61165	2.59064	2.50751	2.35907	2.6656	2.44512	2.29735	2.77564	2.13269	2.38438	2.33874
RHEBL1	5.45439	5.27523	5.78969	5.57147	5.37649	5.05474	5.15229	5.30025	5.45741	5.25456	5.04584	5.40866	5.19762	5.19117	5.01003	5.07882	5.53091	5.1937	5.51525	5.32047	4.96832	5.46972	5.18505	4.91639	4.91677	5.2872	4.92761	5.5	5.18964	5.40152	5.02898	5.57147	5.30413	5.00773	5.01598	5.15848	5.27905	5.16929	5.2866	4.83725	4.93157	4.67916
MCRIP2	7.98972	8.78941	8.73761	7.91243	8.82567	8.28739	7.75868	8.59201	8.98853	9.59975	9.65708	8.10616	8.68118	9.5629	8.36793	9.32389	8.64172	8.68578	8.56741	8.09427	8.93594	8.24535	9.15951	8.7705	7.32192	7.87285	8.48941	8.57236	8.41576	8.7992	8.25336	8.48257	8.60126	8.99284	8.07888	8.94909	8.34106	8.50999	8.99605	9.09477	9.61042	9.14199
ZNF548	6.60704	6.4845	5.94426	6.89292	6.7021	6.39651	5.82401	6.15745	6.03587	6.09777	6.35939	6.4133	6.24902	6.35275	6.62587	6.37015	5.9754	6.15261	6.46593	6.4013	6.49869	6.31789	6.76508	6.15644	6.0972	6.51692	5.86662	6.16417	5.91705	6.22788	6.01305	6.51117	6.67824	6.19081	6.75347	6.33639	6.34458	6.28121	6.50714	6.22694	5.93954	6.24
AMER2	3.83484	3.9034	4.15285	4.30831	4.15621	3.68107	3.84171	4.04202	4.11826	4.09803	3.95505	4.06291	3.99548	3.98363	3.84355	3.99407	3.90521	3.76635	3.95901	3.84061	3.8367	4.00224	4.08484	4.10622	3.91123	3.96914	3.82158	3.84062	3.85649	3.94778	3.51453	3.90471	3.72104	3.78253	3.84771	4.00037	4.45208	3.8431	3.89583	3.90243	3.9922	3.79865
RNF152	2.27447	2.39368	2.51137	2.30142	2.35978	2.58597	2.64522	2.48776	2.42648	2.29396	2.3851	2.36268	2.54647	2.67112	2.37072	2.36426	2.39844	2.55886	2.27687	2.20867	2.51362	2.11903	2.5997	2.25415	2.22656	2.38038	2.34072	2.71105	2.36966	2.26881	2.61693	2.42816	2.23787	2.55026	2.39226	2.42168	2.29129	2.10522	2.37404	2.51058	2.63139	2.58168
LRRC43	6.26834	6.08063	6.21662	6.31649	6.69874	5.87376	6.16907	6.40931	6.26139	6.27821	6.47892	6.39679	6.15214	6.24642	6.14747	6.45491	6.2623	6.24587	6.17882	6.46433	6.05854	6.73566	6.58374	6.17083	6.27405	6.21005	6.00366	6.08038	6.18354	5.97835	6.0933	6.38776	6.44536	6.34637	6.50001	6.48711	6.09912	6.25478	6.4563	6.05997	6.23281	5.94968
LINC00337	2.68219	2.31286	3.07299	2.40551	2.75715	2.51051	3.00178	2.57357	2.8474	2.71732	2.42609	2.67268	2.61913	2.80074	2.57108	2.74105	2.76066	2.58588	2.47253	2.31329	2.44034	2.68581	2.49399	2.47134	2.4462	2.37633	2.49889	2.63753	2.4255	3.20013	2.42944	2.67057	2.5883	2.39957	2.72983	2.56524	3.18382	2.37404	2.56988	2.71896	2.65726	2.18799
OTOGL	2.17076	2.21922	2.41464	2.36021	2.50402	2.21922	2.24065	2.40143	2.63553	2.25008	2.40022	2.26057	2.56221	2.13773	2.66527	2.65915	2.37169	2.07131	2.45847	2.23734	2.4892	2.02578	2.25998	2.42026	2.17836	2.27765	2.2198	2.26057	2.36781	2.13618	2.22414	2.19384	2.16237	2.20751	2.14399	2.20531	2.06743	2.01481	2.25721	2.25268	2.10957	2.44184
MGC16025	2.38014	2.39133	2.44289	2.2703	2.64394	2.42047	2.4462	2.56622	2.33887	2.61724	2.44693	2.08273	2.35193	2.27834	2.21347	2.44106	2.58586	2.2724	2.28566	2.3995	2.62722	2.53594	2.47088	2.3025	2.18816	2.40834	2.48707	2.27179	2.27398	2.3715	2.37372	2.68875	2.28717	2.31164	2.27424	2.3898	2.7295	2.55476	2.4609	2.18094	2.47262	2.31012
SPATA25	3.69749	3.59783	4.6568	3.96109	4.02372	3.78002	3.69373	3.70084	3.60867	3.52185	3.62081	3.67718	3.82895	4.01193	3.92196	3.7197	3.71799	3.83267	3.55557	3.73993	3.83267	3.43757	3.97567	4.04711	3.51771	3.83849	4.2094	3.60338	3.73475	3.59068	3.89718	3.47679	3.58455	3.77456	3.57371	3.34769	4.36738	3.41212	3.70927	3.51506	4.00878	3.36781
NXNL1	5.19694	5.17691	5.53802	5.39447	5.55046	5.00861	5.22769	5.26445	4.9809	5.32561	5.55681	4.85086	5.47383	5.43997	5.05292	5.05878	4.87397	5.08527	5.04244	5.19153	5.09229	5.18416	5.82488	5.22743	4.86279	5.2114	5.15654	4.93272	5.08574	5.11707	4.93023	5.15071	5.44762	5.05878	5.32354	4.92962	5.12466	5.08101	5.73385	5.01064	5.46188	5.16996
GLIS3-AS1	2.94328	3.10143	3.33746	3.06004	3.2245	2.96514	2.96759	3.71369	3.34229	3.50751	3.30759	2.86996	2.98014	3.14736	2.97083	3.20095	3.34428	3.37321	3.06245	3.0728	2.92461	3.27271	2.83349	3.46544	2.84949	3.00461	2.96539	3.08819	3.45289	3.20939	2.93862	3.71281	2.98998	3.04306	3.0035	2.7107	3.15862	2.83927	3.4544	3.08421	3.13655	2.96551
KLHL32	2.18678	1.91331	1.83878	2.04487	1.989	1.97089	1.89573	1.94576	1.92828	2.07827	1.98014	1.95545	1.98839	2.13202	4.41421	1.99502	2.01051	2.01278	2.0667	2.61708	2.14389	1.98839	1.97462	1.88875	1.95595	2.54076	2.09558	1.89249	2.17309	2.01881	1.96956	1.92244	2.13001	2.1489	1.94351	1.86586	1.87242	2.05015	1.9303	2.20228	2.24829	1.86218
SLAMF9	4.49623	4.78818	4.6386	4.47809	5.10808	4.61701	4.43447	4.63002	4.47138	4.77967	4.67268	4.53405	4.60976	4.66391	4.42232	4.97193	4.45748	4.48593	4.59493	4.46315	4.49642	4.57448	4.73076	4.9344	4.33351	4.27724	4.74854	4.25449	4.36017	4.404	4.45748	4.5682	4.7543	4.50805	4.6017	4.47529	4.86082	4.61286	4.6875	5.00878	4.75486	4.82174
LOC152048	3.52002	3.54563	3.62603	4.00869	3.61631	3.30012	3.391	3.75029	3.5436	3.74472	3.77586	3.62031	3.55607	3.63608	3.45551	3.72667	3.37054	3.68109	3.68848	3.60167	3.87159	3.91506	4.00489	3.66686	3.85009	3.59497	3.51441	3.56995	3.6416	3.40909	3.43342	3.58436	3.62003	3.64482	3.54426	3.52936	3.7741	3.62853	3.63657	3.3504	3.73218	3.49646
METTL27	4.76321	5.36106	6.10572	4.87429	6.03602	5.38788	4.70909	4.57716	4.76927	5.95981	5.48703	6.06578	4.90367	4.24804	6.73406	5.73963	5.49765	5.70608	5.17323	4.92983	5.19533	5.45063	6.08983	5.14153	5.26065	4.0899	4.92923	5.37277	5.84505	5.97442	4.69501	5.71039	4.99839	6.4266	5.24831	5.24293	5.50731	5.18884	4.87537	4.96567	4.49118	4.70975
LINC00638	4.4512	4.35518	4.47469	4.55598	4.78022	4.27497	4.2335	4.58134	4.44636	4.44635	4.60494	4.49826	4.72422	4.29771	4.53853	4.50311	4.78532	4.17096	4.60248	4.67728	4.29875	4.66527	4.39686	4.5021	4.23564	4.59346	4.46348	4.25016	4.33118	4.38932	4.29853	4.50065	4.47227	4.48254	4.32294	4.61237	4.42871	4.46008	4.24876	4.46314	4.50304	4.543
RASGEF1B	2.71291	2.37409	2.58175	2.58757	2.49457	2.41979	2.36099	2.7186	2.77415	2.5851	2.37811	2.59827	2.51402	2.48045	2.44705	2.42429	2.59218	2.57427	2.63753	2.63963	2.18806	2.68283	2.69939	2.47801	2.51222	2.71806	2.41705	2.50475	2.40313	2.49457	2.38259	2.48719	2.49555	2.50909	2.47179	2.80299	2.29998	2.53618	2.61482	2.52148	2.51271	2.20905
C11orf45	3.0716	2.68506	3.03528	3.10079	3.0118	3.31499	2.93734	3.01222	3.11094	2.51942	3.19258	3.27529	2.74478	2.95258	2.73394	2.83489	2.94796	2.79971	3.20493	2.90531	2.79311	2.85654	2.69391	2.75447	2.51667	2.57195	2.74123	2.76112	2.83551	3.51775	2.47213	2.61415	2.91764	2.87853	2.82541	2.69547	2.90491	2.50568	2.66872	3.39044	2.56373	2.73879
STOML3	2.19591	2.60532	2.58745	2.30365	2.5394	2.18065	2.25929	2.39639	2.48058	2.41479	2.45757	2.33126	2.25086	2.3101	2.30497	2.54376	2.68725	2.29807	2.53752	2.50916	2.22151	2.5002	2.38833	2.28416	2.29692	2.38424	2.38833	2.31099	2.27109	2.51996	2.25238	2.37716	2.65637	2.38322	2.46641	2.46966	2.32949	2.41788	2.38424	2.22054	2.65637	2.27969
SILC1	2.57798	2.87974	2.28829	2.84806	2.91095	2.22876	2.72425	2.93981	2.90714	2.70257	2.47288	2.4173	2.67526	2.81654	2.56618	3.13773	2.85729	2.54638	2.73065	2.57804	2.27246	2.62169	2.90454	2.6926	2.27995	2.36159	2.66516	2.49405	2.72165	2.84493	2.46463	2.7061	2.56028	2.33456	2.73113	2.84126	2.62617	2.43688	2.79217	2.63516	2.56373	2.66329
FBXL13	2.28524	2.85214	2.5774	2.28163	2.6673	2.46317	2.36928	2.41977	2.3024	2.29575	2.70397	2.6282	2.32325	2.37127	2.38691	2.57566	2.5187	2.32092	2.4948	2.3005	2.27207	2.46839	2.40532	2.18061	2.4157	2.21493	2.24137	2.36366	2.50145	2.33671	2.55432	2.39732	2.74016	2.40907	2.06933	2.46688	2.37245	2.44936	2.3793	2.48004	2.5723	2.49164
FAM227B	2.12488	2.25749	2.16642	2.11574	2.20904	2.19397	2.45426	2.14752	2.24153	2.11253	2.35967	2.06692	2.25827	2.26017	2.37502	2.39166	2.18081	2.15149	2.18274	2.16507	2.44107	2.3335	2.25435	2.03698	2.07698	2.47123	2.2197	2.37828	2.42174	2.47612	2.07853	2.24857	2.20529	2.34931	2.37404	2.10798	2.12256	2.152	2.32042	2.27386	2.12749	2.06095
SOX3	3.38278	3.71506	3.55371	3.24407	3.72004	3.44616	3.31052	3.6306	3.62571	3.41239	3.59519	3.26594	3.40202	3.60897	3.34888	3.74292	3.59316	3.21152	3.52843	3.36202	3.31824	3.40428	3.58626	3.58881	2.9766	3.36222	3.33706	3.41204	3.46205	3.14095	3.11284	3.33074	3.62022	3.29703	3.38058	3.28483	3.65287	3.35	3.31644	3.0792	3.43978	3.21945
SPATA32	6.13943	5.95464	6.39496	6.25568	6.65981	5.91846	6.12307	6.12296	5.83738	6.1851	6.37957	5.78724	6.16495	5.77731	5.79735	6.507	6.48111	6.0457	6.27076	6.0763	5.69316	6.58323	6.5083	6.06313	5.8306	6.60863	6.25605	6.05069	5.9499	6.22095	5.94713	6.44352	6.82484	6.00801	6.16227	6.28449	6.37593	6.10646	6.54089	5.79192	6.27655	6.13904
C3orf49	2.88742	2.80419	2.80915	3.15505	2.94755	2.52086	2.70129	2.70252	2.74386	2.87944	2.88103	2.78301	2.70769	3.01749	3.11679	3.0151	2.78467	2.97284	2.3145	2.70129	2.41455	2.76103	3.19174	2.62932	2.73513	2.74695	2.86404	2.55936	2.53014	2.88504	2.63803	2.55289	2.94039	2.90574	2.74147	2.78368	2.74189	2.67416	2.91327	2.63803	3.45919	2.64954
NKX2-3	6.48221	3.96305	4.6901	4.88779	5.40713	6.15119	5.6748	5.25719	5.87797	5.35929	4.20922	7.03594	5.11272	6.52934	4.62441	3.50342	6.01387	6.59808	5.57269	5.84473	5.5295	5.63502	5.51979	5.60859	5.96714	6.72929	4.8686	5.21228	3.98887	3.97828	5.97937	5.41517	4.17955	4.64383	5.36448	4.74113	5.87216	3.99581	4.70111	3.36901	3.29531	4.3264
TMEM252	3.47895	3.61162	4.10591	4.46085	3.70025	3.33211	3.53762	3.51816	3.36213	3.41667	3.44137	3.13802	3.76483	4.04565	3.33965	3.40958	3.64364	3.51173	3.56903	3.28329	5.1148	3.70076	4.44667	3.51124	3.42156	3.6523	3.39257	3.49678	3.5115	3.37355	4.42049	5.55754	3.69119	3.18117	3.68395	3.51173	3.70833	3.55183	3.76221	3.06616	3.63632	3.5429
FAM222A-AS1	2.69645	2.71514	2.72116	2.61721	2.64802	2.3644	3.06134	2.82074	2.58351	2.43956	2.65717	2.39491	2.3567	2.83617	2.5403	2.88161	2.6653	2.53404	2.71931	2.30121	2.54812	2.64357	2.77044	2.75688	2.28236	2.3036	2.80945	2.6337	2.62859	2.56034	2.47738	2.33741	2.49555	2.77533	2.69718	2.43643	2.71055	2.74389	2.65001	2.88309	2.89722	2.77533
TCEANC	3.80235	3.70973	4.30198	3.21871	3.26136	3.89728	3.92305	3.51837	3.51253	3.64892	3.60273	3.7268	3.5472	3.39012	3.20468	3.56641	3.55114	3.2596	3.56101	3.77051	3.64655	3.61196	3.91506	3.53574	3.15221	3.26509	3.1194	4.17099	3.23983	3.53563	3.40829	3.45919	4.20085	2.9804	3.28516	3.41636	3.60378	3.56782	3.4779	3.29014	3.58805	3.32785
RTP1	2.27192	2.49718	2.72234	2.68419	2.93747	2.53223	2.41314	2.60718	2.56738	2.32129	2.84873	2.4716	2.77114	2.44765	2.76219	2.61785	3.12245	2.46842	2.45501	2.25903	2.307	2.55739	2.69411	2.6202	2.56238	2.54767	2.527	2.76314	2.43688	2.5489	2.51999	2.7745	2.57136	2.27447	2.53057	2.46751	2.45707	2.49687	2.89016	2.50169	2.39878	2.66116
PRR35	5.2776	5.16333	5.00833	5.15981	5.41355	5.49342	4.92357	5.08049	5.24525	4.9715	5.20976	5.01994	5.0486	5.30946	5.20434	5.17651	5.01536	4.80571	5.24807	5.05446	5.12474	5.11961	5.16802	5.43964	4.91394	5.14387	5.15905	5.29263	5.11446	5.0342	5.14204	5.0019	5.14042	5.09841	4.86676	4.98301	5.56393	5.01821	5.13434	4.97999	5.3413	5.12531
NXPE1	6.92088	4.02144	6.05037	6.99267	7.34071	3.71721	4.81823	5.34639	6.58218	5.9082	5.8464	4.16966	5.62016	6.51117	7.47777	7.20794	6.24624	6.4537	6.791	7.02041	7.80026	6.0125	6.45237	6.27655	2.86203	4.64394	4.70399	5.11914	3.6009	3.67032	7.98408	4.85481	4.034	7.78955	7.28853	3.65096	3.40934	4.08239	7.83007	4.18337	7.05061	4.39912
APOBEC3D	4.00271	4.05998	4.35767	4.21385	4.43194	3.99851	3.94694	3.92907	4.14271	3.72996	4.17141	3.75135	4.13348	3.86942	4.04661	4.10874	4.26142	3.98149	4.20772	4.07393	3.97744	4.34399	4.40381	3.96505	4.02656	3.82836	3.95021	4.00702	4.12726	4.02972	3.72654	3.7739	4.44327	4.18597	3.89017	4.06904	4.50851	4.04719	4.41801	3.88709	3.90048	3.98108
LINC00315	4.31422	4.57542	4.27678	4.77737	4.76848	4.31573	4.29051	4.58604	4.715	4.53799	4.7952	4.48045	4.56303	4.3648	4.37733	4.49413	4.65599	4.55193	4.70399	4.56057	4.43465	4.56944	4.44351	4.46837	4.42588	4.47898	4.16876	4.45896	4.366	4.43862	4.25581	4.36859	4.56262	4.59555	4.40787	4.43064	4.56234	4.5579	4.55436	4.56394	4.35776	4.5579
COL6A5	2.18192	2.40514	2.20949	2.52188	2.61697	2.35461	2.38372	2.46626	2.81956	2.31577	2.54878	2.29246	2.45261	2.49247	2.4318	2.68642	2.62763	2.42164	2.66151	2.31619	2.42368	2.68716	2.81004	2.28219	2.32073	2.4119	2.30305	2.3018	2.21637	2.35807	2.41647	2.56684	2.30582	2.50736	2.15086	2.26878	2.26932	2.64523	2.47492	2.53293	2.25216	2.2943
C4orf45	2.48622	2.89074	2.32368	2.42656	2.54063	2.46037	2.28717	2.41008	2.59192	2.11599	2.52148	2.39334	2.32368	2.37408	2.51404	2.46949	2.56737	2.31245	2.18228	2.54247	2.53668	2.55944	2.78895	2.38722	2.47825	2.79782	2.47933	2.46702	2.49815	2.48705	2.36679	2.75986	3.04026	2.33405	2.53299	2.41298	2.57541	2.39535	2.50356	2.43098	2.54792	2.33472
BEND2	2.45253	2.24181	2.58041	2.41796	2.68102	2.34261	2.27533	2.50837	2.40667	2.45387	2.35484	2.50178	2.4195	2.50986	2.4736	2.46486	2.31143	2.15234	2.41308	2.4471	2.41857	2.56856	2.53696	2.29548	2.20725	2.42686	2.14801	2.4849	2.58748	2.3535	2.24716	2.26882	2.50955	2.4828	2.37404	2.58748	2.19431	2.27271	2.16124	2.45046	2.35501	2.42138
C10orf67	5.11544	5.43382	5.86473	5.61922	5.82744	5.03729	5.21629	5.40291	5.57379	5.38459	5.55907	5.09669	5.18079	5.49044	5.13778	5.51726	5.20252	5.01437	5.27788	5.25685	5.00636	5.43106	5.23123	5.43309	4.63131	5.33877	5.2499	4.84941	5.14398	5.18889	5.1758	5.34493	5.48657	5.31215	4.82706	5.14943	5.05245	5.2552	5.41716	4.95716	5.12874	5.06568
CBY2	4.24812	3.88815	4.12322	3.30884	4.11738	4.24059	3.96656	4.16419	4.10647	4.02906	3.8623	3.94759	3.81302	3.69241	3.8176	4.38187	4.17685	3.96441	4.06553	3.82579	3.87533	4.30163	3.88146	3.93373	3.47981	4.29078	4.14156	4.11103	3.53807	3.57845	3.79291	3.98827	4.06435	3.82666	3.92885	4.1283	4.15357	3.992	4.12624	4.12628	3.55969	3.70797
CCDC26	1.98041	2.38054	2.15297	2.2174	2.46799	2.03333	2.06546	2.08282	2.2038	2.21635	2.33347	1.885	2.20994	2.1513	2.284	2.32184	2.1064	2.14244	2.2921	2.10097	2.1336	2.21408	2.16445	2.06025	2.26386	1.99526	2.27606	2.08286	2.16758	2.2159	2.12015	2.16776	2.04887	1.99247	1.99777	2.01213	2.1286	1.99211	2.03803	2.07969	2.2792	2.28467
SPIC	2.07564	2.07698	2.03549	1.93148	2.17876	1.98656	2.12793	2.10153	2.06107	2.04057	2.1879	2.01289	2.3253	2.20483	2.05022	2.29897	2.33849	2.11906	2.18158	2.12491	2.13597	2.13558	2.20501	2.13588	2.12883	1.98656	2.1542	1.92089	2.11906	2.22307	2.0369	2.09162	2.08169	2.14711	2.01038	2.02602	2.22095	2.00753	2.14884	2.06651	2.19476	2.21042
P2RY10	4.32035	3.05422	3.50126	3.05323	3.38977	3.01762	3.26029	3.91746	3.63076	3.22729	3.0337	3.58699	3.46761	3.22174	2.79476	3.32408	3.4438	3.93611	3.14762	3.5656	2.80816	4.09705	3.36777	3.76919	3.37177	3.61454	3.15645	3.2588	3.10731	3.09519	3.32694	3.37234	3.82014	2.94524	3.17693	2.92556	3.13028	3.31595	2.96703	3.21061	2.95389	2.92478
IGSF22	5.25383	5.64272	6.19778	5.43191	4.98971	4.8954	5.34539	5.05804	5.22146	4.82132	4.97453	4.9986	5.01953	4.68941	4.96561	5.07882	4.80711	5.03695	4.80689	4.73895	5.18424	4.76449	5.54842	4.74545	4.4323	5.18619	5.65284	5.64911	4.64729	4.93532	4.98945	5.2248	5.19252	4.96429	5.27346	4.80687	4.85607	5.0702	4.60115	4.80799	5.49863	5.03931
ZBTB3	5.15622	5.39928	5.40831	4.95252	5.34142	5.04403	5.67317	5.12396	5.2949	5.42799	5.24337	5.28224	5.42842	4.99299	4.78812	4.70242	5.14405	4.81077	5.1681	5.08478	5.02037	5.35335	5.18502	5.33109	5.02864	5.26801	5.39357	5.50287	5.27623	5.00104	5.1302	5.00082	5.1143	5.69414	4.84078	5.45498	4.79206	5.35109	5.2358	5.42842	5.49618	4.78269
TPH1	2.4821	2.52371	2.57804	2.63419	2.80006	2.2073	2.50879	2.68135	2.24347	2.42396	2.73555	2.61086	2.54802	2.64135	2.26966	2.46344	2.53234	2.48003	2.4009	2.33151	2.18967	2.53615	2.31611	2.5023	2.41152	2.54537	2.50859	2.44399	2.48975	2.48261	2.37404	2.46202	2.53578	2.51405	2.65068	2.50815	2.60366	2.31012	2.78422	2.0399	2.67988	2.37538
DCST1	3.83624	3.23623	3.58685	3.96871	3.66302	3.16054	3.42416	3.70829	3.45919	3.25733	3.71991	3.35803	3.1926	3.54699	3.51467	3.58221	3.65246	3.50711	3.28251	3.29734	3.53945	3.60323	3.77646	3.38975	3.29204	3.13421	3.38108	3.43806	3.31129	3.073	3.22263	3.44872	3.45269	3.51296	3.44171	3.40696	3.74828	3.43592	3.22082	3.28819	3.89052	3.16334
CSNK1G2-AS1	4.34463	4.54099	4.35685	4.61629	5.25297	4.00889	4.66646	4.86681	4.39517	4.45369	4.59954	4.31474	4.50914	4.8302	4.39113	4.59701	4.73607	4.69067	4.1897	4.45304	4.43582	4.86965	4.787	4.5149	4.31204	4.76652	4.23884	4.40908	4.48911	4.3524	4.33717	4.6272	4.83664	4.3598	4.64268	4.56544	4.85264	4.7684	4.78215	4.29232	4.51981	4.46759
ZSCAN10	3.62444	3.66198	3.58692	3.61983	4.12133	3.51821	3.68107	3.71181	3.74456	3.63781	3.89464	3.44263	3.56416	3.7431	3.54735	4.0321	3.82102	3.7122	3.72892	3.71537	3.50616	4.13797	3.9304	3.84788	3.4326	3.74338	3.92835	3.73028	3.45336	3.72641	3.56577	3.76138	3.9304	3.61842	3.80217	3.73262	3.69128	3.70163	3.91068	3.4711	3.62102	3.05718
GOT1L1	2.80356	3.06196	2.88069	3.07919	3.20185	2.91781	2.89393	2.90401	3.37718	2.83564	2.92821	2.96968	2.94492	3.05725	2.74721	3.43614	3.07688	3.05293	2.99749	2.79299	2.94903	3.12295	2.87291	2.94829	2.60307	2.84461	2.9915	2.75493	2.7818	3.19615	2.93862	3.04969	2.93577	3.02052	2.76968	2.78101	2.91988	2.68342	3.18974	3.0239	3.07321	2.82406
C10orf91	4.07332	3.65475	4.07575	4.13346	4.21747	3.99851	4.11286	4.13783	4.01088	4.17188	4.08946	3.83821	4.15752	4.42244	4.2253	4.2641	3.93021	3.86646	4.02395	3.84604	3.76705	3.5682	4.33364	3.99702	3.78976	4.07791	3.93185	3.74639	4.16586	3.86061	3.70224	3.88747	3.8436	4.13823	3.73665	3.87101	4.501	4.0554	3.83555	3.79519	4.10489	4.17698
ZNF99	1.9428	1.9913	2.23708	1.96069	2.0735	1.77089	2.28717	2.16723	2.13899	2.00407	1.9076	2.19108	1.96248	1.99577	1.82582	1.85308	2.0399	2.25727	2.03091	2.09014	2.07302	1.95105	1.84371	2.00108	1.81871	1.99765	1.9853	2.2953	1.97674	1.95469	1.87881	2.15116	2.02283	1.91934	1.82385	1.97267	1.88182	1.93313	2.17299	2.05963	2.27112	1.83114
SIGLECL1	2.82105	2.49908	2.42295	2.74188	2.71406	2.42509	3.05871	2.51356	2.60409	2.68149	2.63949	2.33697	2.8423	2.62925	2.53754	2.82215	2.56991	2.42295	2.60006	2.39846	2.52899	2.42255	2.71338	2.52445	2.46663	2.63469	2.55702	2.34478	2.55367	2.48334	2.31195	2.53228	2.62323	2.56373	2.58331	2.70562	2.62859	2.54561	2.53008	2.61522	2.69694	2.75292
LDHAL6A	3.11784	3.57431	3.3352	3.22143	3.07319	3.03706	3.16058	3.27031	2.95779	3.17255	3.33971	2.98142	3.22601	3.18669	3.01694	3.08195	3.14452	3.12927	2.85566	3.19355	3.18153	2.97626	3.3014	3.14102	2.80203	3.06933	3.38319	3.01987	3.11079	3.07569	2.90876	3.2027	3.58887	3.35621	3.51465	3.62921	3.11827	3.09186	3.41178	3.0198	3.06044	3.25733
MRGPRX2	2.84052	3.0338	2.44297	2.70269	2.95105	2.55739	3.27285	2.8089	2.88488	2.69526	3.25695	2.72113	2.80975	2.87509	2.55937	2.89024	3.20535	2.84099	2.63568	2.73598	2.87134	2.85137	2.94677	2.78959	2.70269	2.66052	2.5296	2.73768	2.82259	2.90373	2.60623	2.87465	2.81179	2.79822	2.62254	3.00201	2.93921	2.78475	3.05926	2.81184	2.80478	2.8221
NTN5	4.32566	4.19921	4.20818	4.44391	4.64413	4.30045	4.44039	4.44907	4.16438	4.40188	4.44477	3.89113	4.54189	4.77638	3.88876	4.59737	4.47361	4.35259	4.25151	4.40309	4.1203	4.45144	4.70496	4.34997	4.13877	4.23187	4.37135	4.26353	4.16249	4.33969	4.15383	4.20378	4.40777	4.39162	4.57886	4.65904	4.82318	4.16412	4.89895	4.15634	4.10536	4.26058
KLF17	3.0502	3.18921	3.14697	3.05225	3.42965	2.99086	3.064	3.13436	3.2013	3.21122	3.28287	3.10509	3.27087	3.05949	2.89709	2.99456	3.13781	2.86869	2.95469	3.11957	2.90802	3.32041	2.89551	3.12883	2.91027	3.00542	2.97443	2.92412	2.93863	3.21562	3.16427	3.11582	2.97724	2.99814	3.00159	2.98748	2.93606	2.92486	3.14151	3.01017	2.84108	3.08457
CCDC105	3.74908	3.65197	3.74294	3.52079	3.9789	3.22587	3.74872	3.52783	3.65947	3.36817	3.83993	3.22454	3.56682	3.8793	3.59718	4.14279	3.81583	3.58619	3.86328	3.45922	3.10366	3.68509	3.63625	3.71093	3.19273	3.59858	3.46702	3.68026	3.50311	3.51203	3.17564	3.89334	4.12555	3.38919	3.59365	3.51856	4.21462	3.51509	3.822	3.46997	3.8755	3.71064
CCDC122	2.1353	2.55092	2.15554	2.81977	2.31453	2.467	2.96659	2.54775	2.48887	2.16328	2.44423	2.2866	2.59373	2.20641	2.45009	2.44689	2.3771	2.32711	2.27544	2.40674	3.15756	2.3975	2.49652	2.39318	2.50656	2.48887	2.13685	2.58788	3.42328	2.74231	2.37064	2.21494	2.53184	2.86969	2.50585	3.17454	2.24658	2.54662	2.37779	2.08611	2.71724	3.60902
C11orf42	3.60315	3.5229	3.64686	3.43828	3.79627	3.44931	3.29869	3.6537	3.27141	3.55612	3.6353	3.29129	3.63615	3.76377	3.35388	3.46633	3.36683	3.51251	3.5512	3.33076	3.23759	3.31175	4.08781	3.53872	3.2196	3.6943	3.53792	3.53148	3.16836	3.47466	3.37256	3.1392	3.47765	3.18704	3.27465	3.56733	3.89703	3.66568	4.13256	3.26352	3.57286	3.43169
DKFZp434L192	2.07564	1.92681	2.09731	2.56674	2.52778	2.31512	2.15629	2.12559	2.21663	2.56955	2.20145	2.16947	2.1364	2.21993	2.31734	2.09096	2.76806	2.22789	2.29468	2.15912	2.30812	2.32907	2.41264	2.26033	2.19285	2.40834	2.42341	2.06554	2.16625	2.26088	2.20733	2.20733	2.29465	2.24855	2.34032	2.27964	2.42745	2.50736	2.50103	2.41661	2.54174	2.12574
ZNF486	2.3783	2.67284	2.47795	3.15223	2.54337	2.45069	2.40023	2.25748	2.40389	2.50278	2.43451	2.31672	2.80903	2.63534	2.43426	2.42492	2.36127	2.56086	2.55455	2.31644	2.31672	2.3982	2.37315	2.42505	2.55574	2.36284	2.43464	2.3572	2.3656	2.57132	2.55829	2.4226	2.86112	2.43609	2.66504	2.7933	2.44064	2.56994	2.64928	2.50494	2.63722	2.63039
FGD2	8.18724	7.14794	7.99091	7.94839	7.91984	7.12706	7.61858	7.30725	7.8683	8.15154	7.77516	8.19063	7.30825	7.32471	7.19211	7.44245	7.77679	7.80964	7.29788	7.73276	7.04295	8.14076	7.75345	8.0531	8.14132	8.81871	7.75456	7.52375	7.73688	7.90778	7.52606	7.68839	7.64493	7.78104	7.28539	7.48144	7.67283	7.55302	7.55592	7.74962	7.41737	7.10479
EXD1	2.24445	1.98196	2.05712	2.00275	2.15069	1.85218	2.2512	1.9594	2.10378	2.23127	2.13499	2.05712	1.99029	2.04249	2.09011	2.19722	1.94457	2.15591	2.04181	2.12112	2.14627	2.18671	2.2688	2.06734	1.99388	2.03674	2.15916	2.23381	2.10145	1.98302	1.94914	2.19961	2.30725	1.99945	2.16785	2.19549	2.01178	2.30984	2.21731	2.08546	2.10673	2.10633
NBPF4	3.80886	3.22782	3.81241	3.70184	4.71357	3.25549	3.57985	3.75821	4.13533	3.97288	4.46096	3.53911	3.4482	3.52015	5.61752	3.6161	4.48676	3.33149	3.85001	3.97835	3.63909	3.86209	3.66587	4.08809	3.35067	3.32617	4.24	3.56255	3.63222	4.19217	3.44744	3.83861	3.9967	3.56068	3.53505	3.65813	3.49655	3.55012	4.39694	4.62074	4.61839	4.12162
ZNF663P	2.39122	2.31834	2.506	2.24156	2.3717	2.19531	2.2942	2.51706	2.55972	2.51442	2.41377	2.47476	2.33905	2.37404	2.40397	2.54636	2.42408	2.40397	2.39511	2.30146	2.15157	2.39909	2.40496	2.35584	2.37828	2.83573	2.27204	2.28566	2.37613	2.32403	2.67345	2.44254	2.30334	2.25601	2.6856	2.48744	2.66838	2.1618	2.90134	2.37993	2.34846	2.27921
LINC00955	2.17076	2.31439	2.2571	2.13024	2.25864	2.0756	2.05495	2.05597	2.20655	2.35857	2.38953	2.21487	2.26892	2.22174	2.20454	2.19233	2.25299	2.31125	2.09975	1.99004	2.35869	2.02854	2.08515	2.13037	2.11237	2.00758	2.20676	2.12534	2.10618	2.36119	2.31622	2.29046	2.15647	2.41757	2.33851	2.14783	2.4404	1.97684	2.24318	2.09325	2.27147	2.12042
LOC162137	2.27447	2.89992	2.61365	2.71027	2.47512	2.51066	2.19319	2.45501	2.59862	2.54564	2.85644	2.39978	2.51914	2.74945	2.426	2.54423	2.86409	2.3717	2.5062	2.46642	2.43252	2.52185	2.60867	2.44796	2.37872	2.50407	2.81148	2.43097	2.3776	2.40004	2.39878	2.52287	2.63801	2.52305	2.64639	2.75179	2.56714	2.38896	2.70001	2.48754	2.56373	2.34932
C10orf126	1.81476	2.08709	2.08133	1.92406	2.31453	1.81361	2.15215	1.98606	1.73756	2.02017	1.96518	1.84924	1.8283	1.95733	1.88355	1.87893	1.9586	1.83307	2.05445	1.90988	1.99804	1.97948	2.19314	1.90221	1.91084	2.18287	1.8103	1.90593	1.77405	1.92745	1.92184	2.06527	2.08636	1.7504	1.93777	1.63035	1.88957	1.93479	1.93227	1.83702	1.77215	2.00359
LINC00479	3.79279	3.49972	3.61029	3.6265	3.98342	3.54585	3.25764	3.78911	3.68362	3.78657	3.83726	3.67986	3.60353	3.77594	3.43396	3.60319	3.76066	3.3977	3.70025	3.53928	3.76696	3.47215	3.69449	3.55275	3.63792	3.60138	5.01239	3.67128	3.729	4.16256	3.46714	3.63645	3.6122	3.57601	3.85611	3.63466	3.84213	3.87894	3.87229	3.42886	3.7541	3.86268
C9orf62	3.35477	3.32621	3.3209	3.70138	3.51101	3.21676	3.35961	3.37994	3.60128	3.43489	3.66845	3.27483	3.5504	3.46384	3.463	3.27535	3.23323	3.27718	3.46233	3.38763	3.25908	3.3209	3.25588	3.22249	3.20552	3.13134	3.60184	3.16658	3.36664	3.3504	3.08946	3.00086	3.35963	3.37628	3.53847	3.36354	3.12377	3.11303	3.57207	3.16997	3.29919	3.29745
SLC22A24	2.64062	2.6571	2.84663	2.7257	2.90781	2.5945	2.31863	2.66342	2.55713	2.78891	2.93578	2.65389	2.89312	2.44074	2.74037	2.7362	2.79278	2.53405	3.10858	2.64146	2.74128	2.72042	2.85836	2.81488	2.59266	2.50862	2.66438	2.55643	2.68981	2.53483	2.63257	2.87161	2.741	2.71696	2.91236	2.69366	2.47471	2.61491	2.8363	2.57062	2.74384	2.91172
FMO9P	2.32063	2.41994	2.48948	2.33289	2.54275	2.33009	2.33114	2.34818	2.43227	2.57171	2.32222	2.35177	2.38946	2.42577	2.36917	2.45547	2.56269	1.99671	2.32585	2.40676	2.17692	2.2711	2.21522	2.15365	2.03395	2.47639	2.20799	2.08052	2.1613	2.26088	2.32673	2.25392	2.18776	2.34535	2.32401	2.2639	2.7452	2.28692	2.20112	2.20228	2.35137	2.3702
C7orf33	2.7679	2.77914	2.84601	2.94215	3.31926	2.43937	2.84087	2.87925	2.94879	2.77914	3.27599	2.78831	2.94524	2.7705	2.89583	3.29992	2.82098	2.77243	2.8376	2.95532	2.92236	3.10731	2.89713	3.01643	2.69061	2.52314	2.8433	2.88034	2.81141	2.7492	2.66099	2.96959	2.83635	2.93162	2.39839	2.8459	2.91071	3.13678	2.86441	2.82266	2.83485	2.74839
ACER1	3.17525	3.26559	3.39862	3.1207	3.88876	3.38053	3.40208	3.28808	3.51122	3.17985	3.60778	3.26719	3.0976	3.38298	3.3905	3.51408	3.19458	3.1583	3.33391	3.09378	2.9373	3.34062	3.55791	3.3884	2.92551	3.1908	3.38556	3.18177	3.28427	2.98518	3.00564	3.25363	3.09808	3.14609	3.19542	3.48174	3.49959	3.20411	3.22516	3.04206	3.03968	3.18877
TAAR1	2.07564	1.98659	2.12112	2.02497	1.99284	2.07136	1.82215	2.02985	2.04553	2.05986	2.02645	2.10801	2.24757	2.15607	2.21955	2.07564	2.099	2.41051	2.03571	2.07564	2.02443	2.36457	2.29839	2.14047	2.02168	2.35062	2.17466	2.07706	1.95893	2.29491	2.08022	2.11555	2.31466	1.81419	2.16233	1.9884	1.93728	1.87787	2.07018	1.8099	2.02465	2.13428
OSTCP1	2.17959	2.27909	2.43233	1.89389	2.39547	2.06054	2.06312	2.29698	2.27163	2.13817	2.81287	2.21691	2.21015	2.3624	2.21415	2.51301	2.41053	2.10201	2.31292	2.19583	2.25165	2.33089	2.45713	2.2477	2.00541	2.30951	2.23121	2.2669	2.16476	2.323	2.16595	2.25945	2.30202	2.19407	2.01142	2.11202	2.23888	2.24489	2.07817	1.98574	2.05855	2.44237
LINC00305	2.2258	2.12297	2.54091	2.24258	2.37299	1.96167	2.19611	2.10895	2.24923	2.02527	2.24009	2.10313	2.32981	2.21642	2.13493	2.12883	2.5283	2.10948	2.24051	2.37536	2.44518	2.31649	2.36686	2.14686	2.14919	2.08246	2.21382	2.30571	2.14957	2.27396	2.10881	2.17478	2.29129	2.14067	2.1385	2.30301	2.48711	2.10524	2.13466	2.21112	2.06922	2.458
BFSP2-AS1	3.28775	3.38036	3.67838	3.58228	3.82104	3.29219	3.391	3.1834	3.21682	3.13497	3.63863	3.29676	3.44251	3.68252	3.25163	3.64627	3.30076	3.63953	3.60074	3.68909	3.25569	3.5418	3.76409	3.26183	3.25516	3.51549	3.23523	3.34983	3.41034	3.14244	3.13128	3.40175	3.32878	3.31028	3.41904	3.27665	3.69543	3.16848	3.0728	3.25488	3.44776	3.3046
LOC171391	4.20097	4.24522	4.23047	4.31534	4.60259	3.75563	4.15612	4.10573	4.15174	4.17793	4.59363	3.9524	4.09005	4.3205	3.92851	4.40398	4.26541	4.14154	4.27683	3.89113	3.79143	4.16931	4.10308	4.21136	3.96704	4.15599	3.95408	4.09658	4.29013	4.00281	3.87749	4.15187	4.13261	4.13323	3.8339	4.46304	4.26983	4.17389	4.40246	3.95069	4.0428	4.17968
GPHB5	3.21345	3.44888	3.6607	3.50083	3.79505	3.13357	3.18002	3.42703	3.36057	3.15215	3.69309	3.45615	3.71256	3.49973	3.61907	3.41709	3.57059	3.31779	3.38459	3.3576	3.53835	3.8332	3.8226	3.37159	3.20698	3.06516	3.39438	3.50976	3.40531	3.55598	3.32373	3.33717	3.46184	3.26671	3.61592	3.25328	3.5863	3.16984	3.35193	3.54645	3.34553	3.4149
DCD	3.20477	2.95119	2.74287	3.12521	2.86505	2.69974	2.96599	2.89366	2.59676	2.88781	2.99352	2.73783	2.8702	2.8955	2.99523	2.86911	3.18434	2.81924	2.78165	2.50916	2.77253	2.75569	2.88438	2.79348	2.84958	3.20322	2.80211	2.73289	2.56373	3.05951	2.55389	2.65975	3.27146	2.73012	3.26523	2.75263	2.8409	2.37464	3.03056	2.86317	3.18164	2.99406
ZDHHC19	3.91867	4.11089	4.18177	3.72062	4.11014	3.99002	3.84967	3.89601	4.17686	4.01411	4.12769	3.67082	3.90594	4.27842	3.68432	4.2601	4.09681	4.1232	4.25279	3.86537	4.01522	3.93455	4.06425	3.81204	3.81486	3.9607	3.86255	3.89021	4.24364	3.81776	3.64611	3.88106	4.22631	3.56366	4.12948	3.85307	4.559	3.85566	3.98064	3.81167	4.21871	3.97501
ALG14	6.92893	7.78258	8.27605	6.43933	8.10745	7.0035	7.09976	7.71083	8.10806	6.42719	7.54722	7.38328	7.33468	6.13062	7.66802	7.63199	7.43849	7.60233	7.57018	7.095	7.49951	7.52116	7.45645	7.32385	6.78336	6.34618	7.74441	7.85013	7.62655	7.48086	7.59248	7.2923	7.0626	7.65051	6.75865	7.02932	6.7644	7.02624	6.20897	7.64948	6.23947	7.37513
PPP1R21	6.56609	6.15189	6.57056	6.45896	6.09286	6.49717	5.92008	6.56979	6.57025	6.46389	6.46613	7.16944	6.52135	5.35626	6.53359	6.26186	6.52243	6.5149	6.57578	6.35184	6.76445	6.17863	6.64093	6.35187	7.18482	6.20347	6.67467	6.20883	6.85413	6.44182	6.4293	6.57791	6.68079	6.51305	6.48808	6.14535	6.09731	6.40236	5.67725	6.45727	6.34303	7.24621
TMEM237	4.83644	5.39279	4.47497	4.52303	4.83667	4.80041	4.29034	5.00667	5.3106	4.49472	4.2889	5.90051	4.67433	3.52328	5.59677	4.79807	5.10197	4.97388	5.03316	5.40305	4.63563	5.62376	4.07608	4.73285	5.00292	5.48658	4.97662	4.90475	5.08606	3.10227	4.41199	4.71679	4.57808	4.96097	4.5977	4.95556	4.22138	4.30467	3.99802	5.15068	3.48217	4.45664
ZNF564	5.8946	5.75883	6.15673	5.45286	5.93156	5.37591	5.98422	5.78496	6.36536	6.20152	5.60239	5.67107	5.87515	5.59597	6.41071	5.5842	5.70771	5.94535	6.09249	5.7636	5.51821	5.54212	5.44817	5.96248	5.70419	6.05468	6.18275	5.72996	6.07228	6.17979	6.40928	5.9666	5.66364	5.85547	5.99181	6.23382	5.55544	5.82771	5.63627	5.63467	5.84052	6.29205
B3GALT6	7.56879	7.45631	7.462	7.5938	6.63421	7.17026	7.52243	7.65863	6.77062	7.32733	7.46896	7.06467	7.52935	7.78969	7.79516	7.33603	6.71002	8.08701	8.53776	7.62577	7.22626	7.08237	7.22913	7.52242	8.10695	7.17184	7.03179	7.87262	7.0847	8.05454	8.11518	7.26521	6.83517	7.59141	6.96161	7.70302	7.80227	7.67199	7.39913	7.75246	7.74656	7.48214
SNX21	5.91562	5.72336	6.21715	5.90652	5.01437	5.64768	5.5038	5.13532	5.4107	5.86115	5.44945	5.77138	5.34434	5.31077	5.3045	5.03653	5.17545	5.56687	5.12259	5.52091	6.11229	5.28508	4.93514	5.1981	6.0862	5.7089	5.53786	5.72009	4.80177	5.65786	5.89503	5.96599	5.44109	5.50757	5.99837	5.57654	6.06825	6.33323	5.34934	5.4124	5.23885	4.73481
CEL	9.31819	4.4019	4.9302	9.20072	4.15115	8.995	6.57381	4.48015	7.26633	4.40961	4.09113	3.81929	5.87581	9.48837	3.97843	3.40454	4.46895	6.45848	4.09418	6.71032	9.18085	3.80505	8.37938	6.01108	5.14738	4.04158	4.15345	5.15565	4.64593	6.98849	8.7263	11.4678	6.7779	8.49084	8.20247	5.28293	9.77309	8.54066	3.74768	3.60034	7.22904	6.29404
CASTOR3	3.35174	4.43953	3.84749	3.85877	3.48984	3.74752	3.43836	3.52235	3.6538	3.75029	3.7489	4.03963	3.88861	3.35615	3.88446	3.61942	3.02567	3.70512	3.83558	3.60188	3.44145	3.87676	4.13193	3.91147	4.37146	4.55274	3.81589	3.28214	3.70011	4.25491	3.74903	3.72318	3.84607	3.66587	3.87374	4.10987	4.06989	3.9592	3.78249	3.8233	3.5607	3.21209
CBS	4.8482	6.67782	4.72093	5.08254	5.20771	5.37236	5.14818	6.08109	4.91273	4.55712	6.01141	7.66822	4.5453	5.65254	6.33453	4.96534	4.3698	6.50691	7.73621	5.56935	5.90511	4.96817	4.45523	4.96657	5.51872	5.33896	4.85925	5.87632	4.92438	4.93956	4.89785	5.29376	4.28036	4.92395	5.12438	4.95132	4.94183	5.80722	4.51841	5.34643	5.8897	4.45489
SPINK6	2.53696	2.87974	2.84875	2.70753	2.71258	2.70089	2.54346	2.80594	2.90152	2.80506	2.95015	2.85886	2.87423	3.04679	2.70998	3.1254	3.01058	2.88214	2.81203	3.15267	2.50942	2.77931	2.63624	2.85466	2.74553	2.60013	2.98614	2.73489	2.46609	2.5344	2.65892	2.9322	2.94796	2.73802	2.70746	2.75903	5.12094	2.85902	3.27728	2.90422	2.63753	2.67634
C22orf39	5.94597	7.46001	6.79721	5.61414	6.05508	7.68062	5.43562	7.19099	5.63993	5.1002	7.19722	5.90437	6.56682	6.40397	6.50764	6.75293	5.09756	6.35179	6.56029	6.07111	7.51724	5.78642	5.35696	6.53251	5.3351	5.57229	6.61539	6.17062	6.78563	6.00368	7.1631	6.5832	6.4436	5.82608	5.70609	4.88868	5.97576	6.52317	5.11148	7.01075	6.41018	4.56439
CYP39A1	5.12256	7.12983	6.42975	6.11151	6.0327	5.04112	5.3406	4.77509	5.74466	5.01013	5.48967	5.43577	6.17634	4.94719	6.89972	5.84365	4.41826	4.91843	5.97905	6.93241	5.36795	5.27416	6.28978	5.63451	4.80696	5.45701	5.2212	7.04002	5.49126	5.71521	4.9541	6.73006	5.19648	5.00024	6.43925	6.47852	6.91695	6.4542	5.38422	5.91403	6.94139	4.54561
BORCS8	6.6931	6.6635	7.18528	5.7125	6.47931	6.04399	6.14832	6.03233	7.18219	6.74435	5.7999	6.72323	6.58959	5.90833	6.17324	5.77427	6.01425	6.66874	6.16943	6.41077	5.88269	6.22088	6.01942	6.22102	5.93882	6.30247	6.0947	6.43934	6.16952	6.15803	6.12995	6.10019	5.76798	6.24332	5.83447	5.77581	6.08314	5.98732	6.67571	6.18612	6.2259	5.67794
ZNF121	8.76972	8.92453	9.09503	9.22577	8.13564	9.20792	8.86692	8.57463	9.01818	8.58794	8.44259	8.99859	8.93488	9.09204	9.67423	8.96747	8.52235	8.8641	8.78214	8.47578	8.90974	8.59998	7.46763	8.42666	8.78945	8.87759	8.9322	8.60898	8.93003	8.45657	9.29696	8.95698	9.46546	8.88881	9.03336	9.00054	8.71923	8.86088	8.85222	9.19534	8.7878	9.20954
DTYMK	8.52491	8.93882	8.62447	8.65004	8.35011	8.82943	8.39213	8.34385	9.05678	8.48603	8.57689	8.56932	7.82934	7.96791	8.67209	8.5854	8.4335	8.56831	8.61816	8.19045	8.48161	8.63252	7.95383	8.39461	7.58693	7.31392	8.30595	8.36014	8.43721	7.58636	8.1101	8.25928	8.12472	8.51776	8.47456	8.44964	7.75241	8.89743	7.77264	8.5316	8.12846	8.15895
RASEF	7.41796	9.61211	7.59441	8.26911	7.96805	6.24924	8.45111	7.37017	8.39118	7.94342	7.98658	4.91385	7.96885	7.88016	8.69773	7.86046	8.3111	8.10512	8.41679	6.16086	7.34663	7.94978	7.87972	7.25893	7.81908	7.83773	8.35246	7.38221	7.88409	9.08139	7.83209	7.81729	8.73417	8.70902	7.4525	8.68368	7.91488	7.20782	8.95245	7.8747	8.58535	9.22313
MAPKAPK5-AS1	6.76817	7.25989	7.36249	6.62782	7.25432	7.49369	7.0689	6.95726	7.19507	6.44163	7.3714	7.22027	6.82865	6.55229	7.46565	7.53751	7.14124	7.20984	7.1482	6.97004	7.20321	7.27019	6.92349	7.12109	6.63108	7.09322	7.39812	7.01051	7.04722	7.32611	7.3323	7.59604	6.98162	7.2111	6.22615	7.19936	7.02142	6.66298	6.0914	7.54841	6.60166	7.411
ATP6V1C2	4.08069	3.95261	5.86594	5.11151	4.1669	3.88143	5.58427	4.74088	3.6373	4.33893	4.49877	3.74626	3.98153	3.94508	3.54249	4.59737	3.63871	4.08895	4.22793	3.94862	6.15156	3.79114	5.50345	4.31779	4.9437	3.57103	4.06256	3.48738	4.01327	4.24295	5.17707	4.70336	3.95861	6.26151	5.78299	4.48007	3.98448	4.65081	3.33802	3.63453	4.53396	3.74089
BRICD5	4.85194	4.29778	4.77742	4.97173	5.01486	4.60445	4.30407	4.64628	5.04338	5.32104	5.16287	4.69492	4.73802	4.69552	4.96632	4.77498	4.55268	4.66309	4.8374	4.78324	4.41061	4.5724	4.99279	4.64891	4.61855	5.74864	4.98097	4.74983	4.36478	4.36459	4.94018	4.85444	5.05671	5.34598	4.92867	4.9066	4.64615	4.67857	5.08558	4.74754	4.79123	5.06278
NBR2	5.19841	5.42309	6.03707	6.34507	5.17271	6.051	6.47522	5.48118	4.64191	5.44844	5.27561	5.21772	6.14458	5.56239	5.72016	4.99062	6.14931	4.84606	5.73465	5.94834	5.46868	5.34355	5.29488	5.43306	5.45148	5.54171	5.93966	5.40713	5.01472	5.04497	5.1058	5.28846	5.56392	5.36542	5.1738	5.28822	5.22454	5.95979	6.1718	4.97021	5.58045	6.22467
ASPHD1	5.93072	5.77778	5.56613	5.45674	5.42004	5.68584	6.0431	5.02537	5.91884	6.57705	7.07316	5.42957	5.89262	5.75086	5.20453	5.74044	5.66502	5.75062	5.93526	5.89102	5.19533	6.5341	5.26729	5.91887	5.61037	5.95745	7.7197	6.57993	5.59659	5.96582	5.60609	6.30333	6.23016	5.14884	6.21085	6.76298	5.6793	6.10131	6.22163	6.41852	6.21352	5.65901
LLGL2	6.94431	7.11489	7.61633	8.49419	7.15433	7.32078	7.02572	7.36197	6.88975	6.971	7.06126	6.33695	7.54953	8.55808	6.60068	7.31035	7.68832	6.80835	6.64487	7.22806	7.53529	6.67606	7.56223	7.07535	6.45274	6.62163	7.72408	7.33638	6.76863	8.09674	7.95541	6.32406	7.33655	7.52225	7.6038	7.17671	7.30542	7.66324	7.83004	6.73981	7.69301	7.23356
USB1	6.36636	6.31353	5.79142	4.60572	5.86598	6.18722	6.55729	6.63481	6.10712	6.46484	5.91873	6.7209	6.41246	5.8837	5.98432	6.01683	6.05349	6.01121	5.71227	6.13939	6.44923	5.80084	6.44316	6.05267	6.60594	5.96136	6.12339	5.91322	6.42722	6.09401	5.68516	5.78598	6.15135	6.53402	6.67859	6.27655	5.98519	6.55291	6.06898	6.29931	6.47817	6.39961
CEP57L1	2.81378	3.21851	2.57609	2.54452	2.54196	3.03128	2.68241	3.01048	3.44811	3.07872	2.58858	2.86089	2.63412	2.42828	2.8851	3.0507	3.04964	2.79316	2.50326	2.95673	2.4369	2.74159	3.03548	2.95089	2.92018	2.81595	2.55594	3.26303	2.94074	2.93077	3.14621	2.81883	2.90483	2.82734	2.56879	2.57349	2.39674	2.74042	2.77034	2.9522	2.71724	3.37159
TMEM239	3.62396	3.54116	3.71787	3.77402	3.8873	3.59619	3.75543	3.81461	3.59801	3.70642	3.94919	3.5514	3.79736	3.89329	3.52835	3.84792	3.76579	3.47159	3.64051	3.83847	3.54692	3.88496	3.72412	3.66955	3.51724	3.44003	3.84268	3.70145	3.80165	3.65968	3.68629	3.69521	3.90823	3.86435	3.88858	4.06648	4.01201	3.88296	3.833	3.54273	3.51662	3.73162
MRAP	3.17552	3.13717	3.4605	3.10523	3.25698	2.95761	2.9885	3.33713	3.21608	3.31613	3.19991	3.35767	2.91893	3.23564	3.26053	3.397	3.3796	3.32192	3.47472	2.99833	3.1775	3.63525	3.08558	3.2561	3.06231	3.24383	3.15645	3.14712	3.3135	3.19484	2.84511	3.20861	3.26027	3.20218	3.05293	2.9901	3.19484	2.96583	3.37735	2.99241	3.20009	2.90311
SMPDL3B	5.5518	5.5256	6.05643	6.16109	6.55048	5.51057	5.58573	5.82402	5.5412	5.72669	6.29374	5.76437	5.79145	6.10452	5.53028	6.4596	5.73808	5.75231	5.86583	5.73693	5.6865	5.93542	6.40337	5.75885	5.46275	5.30935	5.72954	5.64386	5.38839	5.46623	5.73553	5.63709	5.9132	5.63236	5.91996	5.5944	5.92615	5.76248	6.70817	5.63653	6.14685	5.37592
ASH1L-AS1	5.12069	6.82142	6.23992	5.90713	5.61839	5.57603	5.44966	5.69598	5.80943	5.90575	4.90286	5.51972	5.79472	4.69886	5.6844	4.41344	5.8563	5.51041	5.49185	5.3211	5.26718	5.61234	5.14203	5.58685	5.32321	5.39288	5.43627	5.28782	5.98276	5.46694	5.3915	5.37922	5.03855	5.27549	5.40492	5.53476	4.86305	5.32804	5.88504	5.02777	5.37611	5.51825
ZHX1-C8orf76	4.52501	5.23763	4.39449	4.21876	3.92574	3.88146	4.10955	5.03489	4.38863	4.29626	3.93938	4.6301	4.31058	3.86034	4.06412	4.52687	4.33824	4.3049	4.52057	4.19819	3.64266	3.79331	3.92015	4.39661	4.32335	4.39346	4.42158	3.97542	5.14497	4.75907	4.02629	3.93727	4.0454	3.75076	4.33188	5.24258	3.96748	4.42282	4.14144	4.40155	4.17864	4.74426
EPHA8	4.42737	4.43582	4.22279	4.7448	4.73993	4.2804	4.40381	4.38645	4.26776	4.52069	4.95436	4.40077	4.24751	4.26055	4.39591	4.10743	4.35941	4.25599	4.40324	4.27627	4.28083	4.34997	4.40381	4.53699	4.54409	4.6401	4.63506	4.33136	4.30017	4.18404	4.22548	4.20275	4.5021	4.2489	4.34274	4.48105	4.41954	4.17352	4.50559	4.01605	4.18199	4.26474
SLFNL1	4.63087	4.43204	4.23035	4.67389	4.77149	4.15039	4.09746	4.28029	4.42928	4.60089	4.49097	4.04041	4.70633	4.17457	3.94019	4.33278	3.99625	4.20631	3.97495	4.32833	4.10071	4.40262	4.54571	4.31406	4.07662	4.42826	4.17893	4.1204	4.2548	4.28198	3.99184	4.0797	4.53009	4.20531	4.46383	4.23261	4.25396	4.24925	4.29391	4.18849	4.20825	4.32028
DNAJA3	8.84718	9.15403	8.56147	9.20967	8.60428	8.70495	9.10363	8.86686	9.00637	9.24893	9.42945	8.76671	9.20368	8.99638	9.05407	8.91303	8.47915	9.13831	8.98275	8.59321	8.94382	8.97003	9.44341	9.18145	8.42619	7.82672	8.49796	9.13603	8.99251	9.03077	9.41965	9.09637	8.67339	8.94806	8.23715	8.7917	8.92262	9.24886	8.38276	8.70625	9.49345	9.18488
GALNT18	6.96709	5.10128	6.48991	5.66269	6.28117	6.60571	6.45794	7.04062	6.67389	5.2817	5.42872	6.37729	5.42643	5.66596	6.41081	6.23625	6.08803	6.10412	5.77692	6.08391	6.00321	5.64257	4.62611	5.35134	5.91603	6.43812	6.8984	5.82501	6.30602	5.20731	5.53503	5.21576	4.14831	5.36972	5.83529	4.93285	5.46344	6.17609	5.73044	6.0631	5.98927	4.93561
DDX51	5.42976	4.76388	5.44857	5.07695	4.02991	4.85419	5.02986	4.96397	4.25251	4.96053	5.18676	5.50697	5.61094	5.3419	5.5016	4.66037	5.20652	5.12359	5.22018	5.30661	6.0439	5.3698	4.84981	4.87036	5.09335	5.19473	4.82829	5.34014	5.98897	4.91988	5.21536	4.58769	4.57922	5.60857	4.84981	5.46228	4.97017	5.4991	4.78204	5.7361	5.62997	5.56118
TIRAP	4.57728	4.98956	5.1782	4.90611	5.27145	4.77558	4.67215	4.7409	4.85098	5.07927	5.43269	5.02991	4.94884	5.04891	4.67463	5.21672	5.21083	4.3859	4.97311	5.207	5.37442	5.58684	5.15787	4.95636	4.65159	4.87001	5.0378	5.1579	4.83583	5.02763	4.94569	4.91195	5.10574	4.7799	5.07832	5.30034	4.81658	5.19471	5.15089	4.97638	5.26577	4.76384
MIR31HG	2.97429	2.98393	3.17935	2.99201	3.18416	3.07862	3.06709	2.89261	2.79944	2.8851	3.10973	3.10543	3.1525	3.02023	2.6782	3.01939	3.11089	2.97491	2.92732	3.474	2.81258	3.18725	3.03789	5.05052	3.01939	3.04678	5.31679	2.90687	2.9712	3.47424	2.99147	2.84983	2.93403	2.54313	2.87082	2.99274	2.75856	3.08926	4.14784	2.98684	3.07557	4.36814
NBEAL1	4.87917	5.31621	5.39563	7.05005	4.80792	5.56699	5.26133	5.35506	5.57441	4.74536	4.72913	5.50926	5.91387	6.12237	5.75137	5.81094	5.30312	6.22514	5.11077	5.51555	5.5912	4.96087	5.17876	5.41861	5.77364	6.91887	5.63315	5.32334	5.26985	4.46834	5.50636	5.55239	5.44563	5.30661	6.42837	5.7608	5.23309	5.81286	5.79069	4.61253	5.85116	6.54957
C5orf58	3.17088	3.3504	3.60654	3.21807	3.40698	3.31914	3.19525	3.31384	3.65069	3.48163	3.4371	3.34257	3.53043	3.1161	3.19994	3.61607	3.54797	3.46821	3.2046	3.26584	3.28248	3.75998	3.50108	3.53167	3.03061	3.08039	3.32431	3.28834	3.31229	3.29334	2.93391	3.30744	3.30588	3.15422	3.10675	3.64461	3.53184	3.28806	3.07379	3.31938	3.27774	2.94893
CCDC60	5.05396	5.15196	5.30973	5.37786	5.40674	5.009	4.95082	5.29839	5.40485	5.2348	5.36964	4.85604	5.21309	5.3088	5.40637	5.45679	5.54429	5.26827	4.9298	5.30136	5.19613	5.52956	5.49302	5.28847	4.88709	5.6555	5.03577	5.05386	5.02346	5.10524	4.80021	5.21658	5.38681	5.15747	5.21991	5.20382	5.52022	5.28306	5.4627	4.76368	5.07234	4.94345
MSRB3	6.01932	6.22205	6.35062	6.25484	6.47352	5.95964	6.06542	6.0433	5.86157	6.0928	6.34622	6.16442	6.11361	6.49376	6.12591	6.45946	6.12333	6.09839	6.20375	6.33124	6.08889	6.4154	6.0433	6.19078	6.14978	5.89133	6.0042	5.97085	6.19759	6.10622	5.92663	6.31642	6.01111	6.04958	6.24928	6.28714	6.64027	6.10842	6.24876	6.21898	5.52418	5.47971
ADIG	3.69695	3.97086	4.05033	4.09254	4.30304	3.82427	4.35382	4.24505	3.89429	3.75227	4.15602	4.01396	3.34824	3.89043	3.6785	3.68554	4.02698	3.48828	3.7378	3.72255	3.46036	3.76252	4.05087	3.9188	3.99038	4.0301	3.89392	3.56995	3.89385	4.00421	3.56034	4.12403	3.69264	3.74779	4.01529	4.16117	4.11226	3.81649	4.2795	3.89448	4.03651	4.0268
SUGT1P3	2.21878	2.36758	2.49244	2.45828	2.1108	2.33461	2.05774	2.49118	2.31288	2.14258	2.52704	2.05774	2.83021	2.29106	2.15234	2.14655	2.57738	2.09172	2.12683	2.57623	2.62809	2.29095	2.82426	2.14836	2.29238	2.25165	2.24834	2.59299	2.3987	2.7666	2.45239	2.39775	2.48315	2.22487	2.62148	2.7628	2.03779	2.26517	2.09989	2.38419	2.60049	2.33944
CLDND1	8.30483	8.7744	8.26276	7.16865	8.58261	8.11076	7.82126	7.66338	8.746	7.74164	8.40898	8.3245	7.57039	8.10168	8.70706	8.29183	8.07672	8.21535	8.03762	8.07917	8.26059	8.20493	8.17689	8.42556	8.09382	8.46569	7.68366	8.14283	7.61913	8.0638	8.00119	8.10782	7.82761	7.57741	7.3217	7.38427	8.37721	7.45361	8.01185	8.61044	7.60918	7.48025
GDAP2	4.70822	5.05071	4.82075	5.06451	4.42018	5.14703	4.20594	4.39983	4.53378	4.21277	5.31281	4.65644	5.04821	4.69182	5.14765	4.85076	3.85993	5.61576	4.56439	4.22216	4.70408	4.9708	5.25282	4.97935	4.93909	4.89596	4.82906	4.52909	5.35258	4.99663	5.5139	4.98731	5.50168	5.36449	5.27346	5.46413	5.19102	5.37635	5.89523	4.86287	4.54101	5.46407
MBLAC1	4.93455	4.97247	4.84765	5.01984	5.39921	4.97771	5.38185	4.98573	4.91528	5.09154	5.31281	5.38185	4.8901	5.11847	4.9289	5.25684	5.05365	4.86279	5.09845	5.03433	5.04605	5.12407	5.26003	4.80638	4.54719	4.97187	4.77715	4.94442	5.06191	5.21335	4.94744	5.19541	4.87256	4.87122	4.91295	5.54824	5.29093	5.02339	4.71182	4.76887	5.05732	5.32535
CD300LB	4.85798	5.06108	4.92563	5.0419	5.06336	4.66216	4.93877	5.17708	5.00959	5.14449	5.23111	4.62977	5.11277	5.0985	4.99705	5.13047	5.08607	4.72654	4.94544	5.02738	4.81533	5.40849	5.3499	5.2221	5.11257	5.06446	5.20673	4.84972	5.29792	4.91203	4.84956	5.00632	5.22294	4.92017	4.77641	5.03438	5.27252	4.98617	5.2086	4.70713	4.97537	5.12478
C3orf33	2.28521	2.74305	2.31263	2.18493	2.41269	2.30085	2.81652	2.2841	3.09576	2.40067	2.40816	2.40484	2.39058	2.35031	2.41947	2.36049	2.28073	2.36131	2.31453	2.48107	2.50339	2.19688	2.04931	2.22636	2.02669	2.05873	2.44277	2.23353	2.03723	2.14875	2.18182	2.21792	2.32582	2.38311	3.20475	2.01568	2.15314	2.28926	2.14177	2.78089	2.2026	2.24562
LOC554206	2.77555	2.86037	2.82102	2.61231	2.96932	2.78034	2.57394	2.76853	2.89944	2.72072	2.74763	2.69096	2.98309	2.77555	2.75808	2.78366	2.72841	2.6773	2.56591	2.85524	2.65955	2.87298	2.53152	2.90996	2.66669	2.7389	2.86743	2.76221	2.55877	2.7744	3.02886	2.77756	2.80858	2.91612	2.61244	2.86467	2.73199	2.56489	2.98835	2.67862	2.71827	2.76182
C11orf53	5.2367	5.33272	5.31366	5.0521	5.71185	5.22113	5.20007	5.35316	5.3689	5.6685	5.53327	5.57494	5.40984	5.29368	5.39632	5.32868	5.38061	5.22106	5.60147	5.10641	5.20466	5.55464	5.4989	5.16294	4.84655	5.30372	5.40753	4.9626	5.06139	5.27233	5.41494	5.40699	5.23737	5.28072	5.1213	5.64209	5.21745	5.10169	5.13926	5.46344	5.39466	5.04588
TRMT44	4.63572	4.71216	4.32609	4.3617	4.57677	4.61426	4.33395	4.70771	4.5644	4.61821	4.7271	4.55143	4.53166	4.78341	4.54688	4.71688	4.51706	4.30723	4.68422	4.70319	4.4619	4.6055	4.09406	4.50503	4.59593	4.48346	4.68374	4.74301	4.48833	4.67209	4.29075	4.74332	4.81808	4.4322	4.39907	4.55124	4.52303	4.41846	4.73032	4.40154	4.54535	4.49056
C5orf46	3.17816	2.91989	3.30705	3.21532	3.46889	2.93121	3.34892	2.97644	3.31328	2.96822	3.29588	3.21617	3.11807	3.16894	3.1628	2.95569	3.17889	2.88674	3.30879	3.41537	3.0514	3.33861	2.91392	4.1203	3.81862	3.03844	3.72325	3.11011	3.21066	2.95161	2.89876	3.47291	2.85401	3.3891	2.81299	2.81706	3.67781	3.35697	3.37364	4.20929	2.88797	2.98738
IZUMO1	2.39652	2.14558	2.25595	2.18389	2.41273	2.31876	2.40694	2.59966	2.39957	2.4977	2.73553	2.09012	2.55096	2.59235	2.09172	2.56043	2.17403	2.46256	1.9327	2.36544	2.19495	2.54273	2.19664	2.55337	2.31929	2.39039	2.34519	2.18274	2.17643	2.2854	2.32426	2.39409	2.42468	2.28321	2.05812	2.11547	2.3591	2.38389	2.3216	2.10225	2.20903	2.21338
CABP4	6.05106	6.22195	6.16002	6.16637	6.52221	5.78288	5.93484	6.37432	5.97584	6.20152	6.38795	5.80178	6.17801	6.13931	5.92765	5.97047	6.05615	6.07122	6.00753	5.81223	5.9425	6.25916	6.20866	6.05568	5.58178	6.27161	5.95465	5.94262	6.0155	6.08608	5.947	6.27891	6.42342	5.90838	6.25267	6.14349	6.45443	6.17239	6.27918	5.82915	6.29799	6.12451
GRIK1-AS1	3.10894	3.31328	3.15178	3.19104	3.27817	3.26832	3.34084	3.27096	3.09171	3.11171	3.15355	3.13558	3.27293	3.78947	3.35302	3.41274	3.01898	3.01962	3.06387	2.94657	3.1447	3.09353	3.21596	2.97917	2.99398	3.05184	3.15162	3.05819	3.12	3.33218	2.98397	2.861	3.16357	3.14777	3.10008	2.92418	3.09923	3.14056	3.00094	2.96102	3.45907	3.14198
MEI1	5.32454	5.37518	5.46217	5.71366	5.62434	5.0893	5.59149	5.31466	5.74594	5.22598	5.62493	5.54893	5.3612	4.87767	5.2024	5.53621	5.62495	6.06427	5.15979	5.2856	5.18782	5.76693	5.59486	5.41168	5.11692	5.90051	5.4299	5.2722	5.05879	5.41967	5.19519	5.49876	5.34175	5.06793	5.53336	5.21472	5.80733	5.20632	5.66878	5.60801	4.84214	5.02946
ZCCHC13	3.15332	3.0895	2.63538	3.41115	3.15591	2.76166	2.96599	2.9144	2.92175	2.92908	2.90714	2.97982	3.1311	2.84322	2.86003	3.07454	2.78822	2.49831	2.85579	2.78907	3.03615	2.67383	2.52481	3.08288	2.71889	2.88789	3.18533	3.08998	2.93081	2.83127	2.903	2.92532	2.93573	2.81445	2.54151	2.7079	2.91768	2.89429	2.68288	3.02385	3.08505	2.80435
KCNS2	3.74498	3.89122	3.85368	4.09857	4.24337	3.60132	3.75768	4.23868	3.87857	3.82503	3.9275	3.66356	4.00652	3.70542	3.83254	3.79842	3.80317	3.74732	3.61344	3.77304	3.76499	4.03733	3.79872	3.78215	3.63643	4.09764	3.7016	3.90582	3.70923	3.93284	3.75109	3.8646	3.91374	3.94647	4.08743	3.95589	3.91632	3.99702	4.2283	3.75381	3.96875	3.67663
LINC01869	5.10967	5.31619	5.22425	5.24033	5.59864	4.84879	5.28986	5.04797	5.0411	5.27578	5.37955	4.89616	5.2602	5.55968	4.95146	5.46735	5.29383	5.10118	5.1684	5.06932	5.0165	5.3419	5.58219	5.23588	4.80165	5.29323	5.27469	4.97755	4.9534	5.10183	4.72347	5.23807	5.09014	5.01198	5.30875	5.37982	5.53603	5.17966	5.66201	4.72631	5.42921	5.01222
LINC02712	2.17076	2.16358	2.34438	2.36092	2.59456	2.30671	2.35316	2.42767	2.14071	2.26953	2.42869	2.27123	2.46511	2.2641	2.3609	2.34866	2.47246	2.33308	1.91313	2.23212	2.45563	2.3663	2.28086	2.39539	2.1322	2.32843	2.44666	2.27054	2.35868	2.46511	2.21536	2.32384	2.34682	2.51383	2.60886	2.29267	2.02062	2.355	2.37404	2.20228	2.65174	2.35118
BAALC-AS2	3.90156	4.31627	4.19167	4.30022	4.6486	3.81211	4.34337	3.8649	4.15632	4.11683	4.19778	3.70168	3.9558	4.14725	3.84671	4.03176	4.30371	3.98402	3.76993	4.21074	3.82894	4.17378	3.97282	4.13082	3.62253	4.00969	4.37331	3.99197	3.74811	4.15758	3.73896	3.97187	4.12441	3.81226	3.98002	4.15395	3.91231	3.75154	4.03212	3.98002	4.2536	4.12082
ZNF396	3.18441	2.92107	3.15611	3.43991	3.57247	3.10746	3.04741	3.04057	3.17828	3.08383	3.08924	2.95263	2.8312	2.85881	3.12363	3.09843	3.35986	3.08521	3.04875	2.86542	2.90271	3.10731	3.05202	2.96271	2.72808	3.13294	3.08285	2.93573	3.09787	3.04553	3.05725	3.16288	2.98242	2.9807	3.22801	3.24462	3.28894	3.07332	3.50324	3.22801	2.95122	3.00951
COCH	8.55563	7.99158	8.48592	8.86992	8.16583	8.35255	7.9476	8.33316	8.16382	8.02703	8.25813	8.14799	8.5268	9.30943	8.07453	9.11952	8.88469	8.74347	8.94193	8.80254	8.60565	8.55014	8.44073	8.61589	9.43749	9.07651	8.85578	8.81542	9.005	8.68292	8.18052	8.36454	8.33602	8.26558	8.88317	8.80344	8.16287	8.7552	8.04688	7.93032	8.51925	8.5325
C1orf210	4.67927	4.76486	4.76533	4.21931	5.89201	4.40499	4.43113	4.80298	5.16394	4.82212	4.74342	4.16602	5.64603	4.43027	4.6278	5.35872	4.97778	4.30884	5.21795	4.84165	5.21541	4.66513	5.70801	4.91428	4.42402	4.6341	5.77326	4.77132	3.94629	6.2253	4.61415	4.8153	5.12711	4.86435	4.4688	4.81329	5.41022	4.00136	4.44202	4.82492	4.98271	4.96223
CERS3	3.23071	3.255	2.91664	3.30318	3.63474	3.06888	3.0294	3.105	2.83318	3.28772	3.37639	3.00806	3.34875	3.1728	2.90472	3.46562	3.4505	3.51869	3.14051	3.12401	3.22697	3.66286	3.50221	3.25256	2.84588	3.25965	3.317	3.03345	3.17906	2.95702	2.93862	3.27324	3.59489	3.17144	3.28776	3.40784	2.90029	3.21724	3.41964	3.35462	3.59775	3.31131
C9orf43	2.92872	3.10018	2.54353	2.50035	3.11017	2.83221	2.9407	2.74779	2.85653	2.68914	3.06021	2.64541	2.78043	2.82583	2.7991	2.81842	2.84461	2.99983	3.19016	2.87885	2.99181	2.82744	2.91539	2.7991	2.49261	2.6889	2.82022	2.91642	2.56663	2.96753	2.99077	2.96373	2.66628	2.77232	2.52789	2.86964	2.69159	2.78026	2.86054	3.02829	3.01693	2.68505
FLJ25758	4.23441	4.29738	4.51528	4.3538	4.45083	4.04438	4.2064	4.19022	4.06392	4.27966	4.69717	4.49937	4.07371	4.37686	3.91625	4.29295	3.89861	4.0771	4.16082	3.78951	4.09071	4.30933	4.1403	4.1203	3.98201	4.28943	3.98398	4.28281	4.17521	4.21463	4.07719	4.52787	4.48106	4.30294	4.26346	4.51005	3.99376	4.0765	4.68129	3.98198	4.57931	3.87609
SVOPL	2.33635	2.46069	2.13093	2.79765	2.60239	2.21547	2.26063	2.51942	2.61083	2.69545	2.40499	2.37848	2.63945	2.52462	2.31114	2.47241	2.6829	2.57081	2.32809	2.61426	2.40223	2.51861	5.35453	2.41141	2.26162	2.60641	2.58023	2.34654	2.28198	2.35286	2.37982	2.54605	2.87621	2.67018	2.58391	2.4392	2.75275	2.45774	2.80636	2.39801	3.30681	2.66542
LHFPL3-AS1	2.41172	2.22823	2.41089	2.50421	2.7117	2.55952	2.43857	2.50161	2.48184	2.42282	2.64701	2.44323	2.54408	2.52908	2.38344	2.62106	2.56226	2.45894	2.7127	2.3426	2.27563	2.43083	2.72846	2.30812	2.38511	2.3654	2.47588	2.41624	2.50013	2.49692	2.15597	2.60277	2.54063	2.51137	2.66621	2.60333	2.56872	2.39702	2.59872	2.43433	2.42502	2.55728
LOC91370	3.09983	3.42805	3.26909	3.27214	3.81789	3.0648	3.38397	3.13675	3.2615	3.43367	3.71181	3.13649	3.0462	3.12274	3.3883	3.62145	3.34123	3.28014	3.25875	3.19979	3.14416	3.43736	3.38796	3.25561	2.98766	3.38031	3.37389	3.10405	3.18299	3.55401	3.12436	2.98964	3.66423	3.17864	3.4697	2.97737	3.49626	3.25	2.96176	3.12347	3.55072	3.38284
LRRC18	3.07478	2.97091	3.02713	3.04078	3.36862	2.71488	2.92866	2.96945	3.08252	3.06132	2.96158	2.53516	3.06132	3.06485	2.88947	3.03931	3.14261	2.91948	3.01052	2.97983	2.84118	3.06873	3.69614	2.77801	2.60702	3.12011	2.99	3.04291	2.81853	2.87309	2.99506	2.7745	3.07009	2.9984	2.96854	3.07038	3.10704	3.01025	3.12703	2.74092	2.87899	3.0649
SLCO4A1-AS1	6.49931	6.92876	5.01301	6.66315	5.01604	5.2745	6.31546	4.93143	4.88203	7.33688	5.49573	4.52503	5.08687	5.23126	6.23399	5.34261	5.37689	5.01717	4.70392	4.98313	5.28218	5.53227	5.47459	5.68947	4.81307	4.95843	6.54496	6.29345	5.13209	6.26448	6.6246	6.55071	7.27201	5.3429	5.2932	5.72808	6.78942	6.2973	5.9262	4.99279	5.29409	5.27257
HELQ	5.05652	4.65601	4.81351	4.81941	4.71291	4.78149	4.39302	4.73733	4.96865	5.02752	4.94838	5.25358	5.20683	4.78978	4.91886	5.26626	5.58132	4.90072	4.97995	5.09547	4.73865	4.95429	4.89413	4.79556	4.64421	5.18633	5.07787	4.88467	5.12066	4.86381	4.66567	4.85896	4.60669	4.55868	4.46693	5.17081	4.80227	4.74959	4.50582	5.07554	5.23913	4.84717
STAP1	3.27753	2.57608	2.4947	2.81548	2.64398	2.57583	2.57583	2.68579	2.986	2.54116	2.62943	2.85824	2.64461	2.85533	2.84358	3.02047	3.13028	3.28072	2.86534	2.6651	2.6947	2.7936	2.72676	2.89963	2.72533	2.70299	2.86328	2.54972	2.77215	2.53383	2.58079	2.79978	2.70728	2.81445	2.41756	2.95284	2.79801	2.65198	2.85853	2.86148	2.82382	2.5912
DENND4A	5.48781	5.98178	5.5495	5.08973	5.35018	5.68242	5.70505	5.17249	5.01008	5.2497	5.56734	5.34509	5.08837	5.07631	5.51238	5.68281	5.20962	5.44953	5.6953	5.54657	5.61444	5.62083	5.30877	5.64042	6.50479	5.18275	6.07431	6.04429	5.77441	5.66881	5.93821	5.34622	5.15085	5.33097	5.62167	5.58365	5.9305	5.54905	4.71723	5.9043	4.97261	4.9898
CALHM1	3.3749	3.58475	3.51881	4.10353	3.99829	3.07987	3.3526	3.27532	3.29368	3.47984	3.69137	3.36842	3.60736	3.58398	3.20428	4.12793	3.64098	3.36285	3.48178	3.40439	3.06933	3.53118	3.89113	3.43235	3.07463	3.64098	3.39662	3.46194	3.28166	3.54434	3.3096	3.5437	3.88275	3.60034	3.53505	3.82427	3.58358	3.37383	3.67383	3.11517	3.62102	3.32044
TP73	4.34017	4.60479	4.83475	4.43124	5.12389	4.4286	4.45191	4.44184	4.75405	4.66586	4.84906	4.2218	4.69886	4.7254	4.44455	4.71809	4.66152	4.33414	4.54038	4.44531	4.57561	4.31664	4.7874	4.64499	4.40284	4.73987	4.44875	4.65403	4.47712	4.64623	4.47361	4.56158	4.81912	4.52351	4.55591	4.42737	5.22322	4.30282	4.95461	4.55813	4.94232	4.747
LINC00656	3.37045	3.31664	3.59848	3.63107	4.09738	3.85879	3.65716	3.82698	4.02108	3.76287	3.64837	3.55229	3.48749	3.24989	3.65374	3.69886	3.6457	3.45613	3.76659	3.77872	3.28854	3.97113	3.68293	3.47466	3.48607	3.65048	3.316	3.59916	3.63766	3.66307	3.66861	3.75948	3.43695	3.46774	3.61278	3.67531	3.68139	3.67096	3.4303	3.308	3.37888	3.53323
CST9	3.9752	4.46201	4.32212	3.71969	4.19126	4.04017	3.76309	3.88709	3.92502	3.60677	3.99414	3.69956	3.94269	4.23102	4.05222	3.88544	4.01382	3.70939	4.28798	3.70108	4.06507	3.86541	3.89113	3.72393	3.94589	4.00757	4.31016	3.6831	3.85383	4.12655	3.56166	4.08803	3.68951	3.83611	3.87888	3.73638	4.49549	3.54213	3.72405	4.08096	3.80164	4.10189
LYG2	2.65277	3.05503	2.89056	2.43348	2.89496	2.64131	2.97128	2.73531	2.52561	2.83502	3.13934	2.90756	2.53646	2.60408	2.63877	2.55048	2.9826	2.74403	2.92391	2.73381	2.70832	2.40404	2.78539	2.87392	2.60702	2.66052	2.49555	2.50303	2.68361	2.67363	2.70444	2.5667	2.51176	2.63178	2.54338	2.87224	2.75737	2.51707	2.74779	2.78896	2.60244	2.7108
TCTE3	4.77784	4.72033	4.75712	4.67457	5.16421	4.7117	4.52689	5.24245	4.57405	4.71826	4.56647	4.34747	4.9278	4.67838	4.88916	4.67837	4.95716	4.49978	4.58299	4.52627	4.66995	4.53176	4.86793	4.89694	4.62528	4.87742	4.67206	4.45533	4.62804	4.67358	4.58168	4.85461	5.02254	4.8627	4.81821	4.87869	4.59083	4.79715	4.89568	4.68801	4.87742	4.90919
LINC00161	2.33784	2.84579	2.79693	2.58578	3.08999	2.35238	2.56793	2.9591	2.50931	2.99766	2.87529	2.37986	2.5656	2.44157	2.62067	2.72048	2.66393	2.52602	2.47253	2.51181	2.29022	2.69368	2.61982	2.90634	2.50776	2.50815	2.45233	2.65387	2.37878	2.51735	2.25681	2.60681	2.74539	2.37428	2.83854	2.83946	2.69098	2.70757	2.70292	2.91276	2.66458	2.65568
TK1	8.10247	7.60591	7.68917	7.77399	8.09448	8.35317	7.941	8.08112	7.72811	8.0151	8.59476	8.34698	6.94893	6.53622	7.73372	8.09311	7.73074	7.4388	7.92175	7.9202	7.40881	7.95458	7.2037	8.09607	6.34002	7.72853	8.18454	7.46376	7.81626	8.32245	7.69216	7.14697	7.32667	8.12335	7.61966	6.91669	7.29139	7.95685	7.39073	7.63609	7.42609	7.37376
OSGIN2	5.7351	5.90582	5.30715	4.47627	4.09514	5.37607	4.72065	5.92006	5.3341	5.06258	3.95776	6.84003	4.62334	3.48435	5.24199	5.49269	5.6365	5.88718	6.84583	5.84905	5.29137	5.37214	5.4811	5.41535	6.43909	4.24634	4.81685	5.65216	6.79135	6.26649	5.43812	4.96788	4.37254	4.64158	5.15564	4.34738	4.88303	5.34008	4.68478	5.06415	5.09627	5.65685
SMIM11A	5.93919	6.63027	5.9383	5.8151	6.37088	6.15036	6.54585	5.95143	6.30724	5.79759	6.44253	5.59048	5.63857	5.89306	6.0449	6.19867	6.01773	5.9626	6.06504	5.95817	6.07563	5.43114	5.72127	5.9934	5.46155	5.50328	6.03945	6.12696	5.27478	5.91482	6.27141	5.91784	6.21034	5.99174	5.69814	5.87565	5.97167	5.84726	5.82519	5.90058	5.91699	5.40777
BEST1	6.15937	6.03072	6.26693	6.2169	6.80833	5.95036	5.83385	6.32279	6.10199	6.1394	6.37414	6.13288	6.33222	6.2168	5.93486	6.42045	6.21268	6.03467	5.95228	6.13238	6.13073	6.32296	6.50196	6.32501	5.97289	6.57705	6.06774	5.93163	5.69435	6.13754	5.891	6.29193	6.50703	6.01231	6.41564	6.10202	6.27272	5.95803	6.20815	5.82635	6.32293	5.94609
JPX	5.17676	4.20556	4.47469	5.20731	3.28023	4.68364	4.52689	4.29743	3.816	3.95789	3.35371	4.12663	3.57986	5.08724	3.94078	3.32773	3.73246	4.6033	4.76401	3.23277	4.16682	3.92891	3.73531	4.0602	3.89751	3.82903	3.83989	4.50953	4.54162	3.32133	4.38185	4.18149	5.48135	4.23192	5.17252	6.02551	3.93826	4.41419	4.58436	3.46526	5.50341	3.72444
DNAJC14	4.86912	4.71768	4.89615	3.70253	4.33273	4.82507	4.87957	5.12148	4.52681	4.11453	4.59181	5.01365	4.28331	3.65796	5.74209	4.41183	4.70761	4.18501	4.96191	5.2444	5.1723	5.21093	4.48997	4.57272	5.17601	3.8798	4.45072	4.65403	4.89946	5.10183	4.49291	4.38583	4.30826	4.81844	4.30762	3.9088	4.17469	4.43172	3.85032	4.42792	3.58277	3.89279
CFHR3	2.48325	2.4073	3.11218	2.52522	2.57828	2.44222	2.31926	2.78194	2.5092	2.81711	2.72707	2.49559	3.03884	2.50754	2.37166	2.91844	2.82286	2.56495	2.73065	2.59657	2.5905	2.48762	2.59792	2.42019	2.60702	2.5968	2.58469	2.67083	2.70882	2.51522	2.47127	2.61945	2.5988	2.51249	2.72109	2.90484	2.67786	2.64333	3.14715	2.42874	2.66716	2.72939
ZNF808	2.48614	2.30203	2.42616	2.49215	2.83278	2.4365	2.34147	2.31502	2.52572	2.31967	2.33462	2.21583	2.20616	2.66444	2.20663	2.30158	2.44858	2.56263	2.74796	2.20349	2.52695	2.42878	2.19149	2.63463	2.60702	3.1409	2.35049	2.4767	2.51499	2.55691	2.53566	2.48175	2.74691	2.29384	2.52896	2.65058	2.59531	2.49145	2.45215	2.41861	2.60812	2.70381
TMEM37	5.70122	5.65554	6.43466	5.53457	6.78286	5.98073	5.1747	5.96605	6.7944	5.81633	6.16386	5.63687	6.27626	5.23288	5.35522	5.99989	6.59681	6.22329	5.74176	6.43125	5.52575	6.44694	6.85545	5.6415	5.62519	5.55992	6.6687	5.5755	5.71374	7.27402	6.05061	5.91636	5.99594	5.98744	6.54296	5.47416	5.60733	5.55754	5.68631	5.2998	5.84055	5.53313
OSCAR	2.56067	2.88491	3.34409	2.5707	2.95319	2.72119	2.96599	2.63712	2.41528	3.17277	2.45328	2.78296	2.46379	2.36277	2.83074	3.14421	2.41891	2.67143	2.58226	3.08195	2.31974	2.84617	2.69527	2.98083	3.08539	3.10836	2.84464	2.71695	2.74145	2.84639	2.42944	2.47148	2.76175	3.03105	2.45383	2.5162	2.88039	2.78328	2.43521	2.98951	2.50885	2.64361
LINC00537	5.07909	5.26351	5.25913	5.40942	5.68398	4.94769	4.6083	4.88496	5.24909	5.18054	5.30853	4.59812	5.21533	5.57344	4.7545	4.86348	5.07185	4.74172	4.83218	4.98431	4.78741	5.32141	5.41391	5.14491	4.74202	5.26691	4.96818	5.09501	4.81676	5.01594	4.95411	5.09244	5.95534	4.86476	5.25728	5.31017	5.11364	5.11077	5.53763	4.86904	5.65225	5.13315
OLFM3	1.90392	2.31928	2.10314	2.12116	2.41929	1.90781	1.96015	2.33721	2.11808	2.15391	2.44341	2.03974	2.42341	2.01915	2.27499	2.27499	2.1822	1.91683	2.12424	2.09429	1.91355	2.33883	2.25152	2.06403	2.08516	2.40834	1.93249	1.99362	1.91211	2.23889	2.08064	2.1309	2.2096	2.08288	1.80303	2.1811	2.09937	2.10123	2.17249	2.04775	2.10673	2.13363
VSTM2A	2.24981	2.38117	2.08034	2.73843	2.4269	2.23375	2.20405	2.28793	2.33368	2.26141	2.39418	2.06941	2.42849	2.21509	2.24616	2.31073	2.23846	2.5328	2.0846	2.39462	2.15767	2.37943	2.23679	2.14791	2.1051	2.40834	2.2348	2.28365	2.32131	2.22138	2.01221	2.15807	2.52537	2.21878	2.56961	2.26358	2.24118	2.04094	2.79272	2.17867	2.55376	2.51239
SLC25A48	4.60676	4.68639	4.79349	5.01579	5.03213	4.6723	4.87427	4.77879	4.67097	4.88747	4.97396	4.75987	4.69636	4.7227	4.9293	4.85351	5.07951	4.69953	4.81661	4.86074	4.49642	5.00013	4.87338	4.65258	4.6307	5.01764	4.87677	4.85275	4.64815	4.91298	4.31653	4.96052	4.98865	4.86972	4.8929	4.78695	5.21388	4.66201	4.78985	5.04903	4.90661	4.78193
APOBEC4	2.66215	3.13632	2.49395	2.91814	2.89233	2.55739	2.88451	2.77748	2.6202	2.85158	2.69569	2.7197	2.71272	2.7598	2.82568	2.95389	2.81759	2.77122	2.83716	2.71272	2.74643	2.92371	3.07004	2.93332	2.57735	3.13721	2.79006	2.79322	2.52832	2.76412	2.77262	2.39244	2.7793	2.63835	3.0933	2.70978	2.72296	2.72627	3.0933	2.80906	2.74288	2.51316
FAM13C	3.60817	3.26761	2.94927	2.59624	2.27358	4.3493	3.8399	2.88002	3.13349	2.62208	3.25732	4.93787	2.86486	3.2065	3.3246	2.94265	3.12356	3.72103	3.31262	3.86119	3.17592	3.15909	2.95992	3.70192	4.59463	5.03474	3.29121	3.58444	3.86843	3.98908	3.23649	3.34983	2.69422	2.98178	3.12172	3.39729	3.65057	2.91984	2.92815	3.21988	2.55368	3.20976
SETD6	6.95806	6.40915	6.69863	4.91125	5.95736	6.58174	6.46078	6.00657	6.50362	6.64631	5.48115	6.87146	6.53783	6.61679	7.14964	6.35082	7.03383	6.5979	6.5324	6.24001	6.87928	6.3747	6.23488	6.02674	6.05696	6.366	6.04827	5.99477	6.93586	6.10167	6.53599	5.23781	4.96066	6.70455	6.0518	6.19092	6.16184	6.50575	5.67686	6.46078	6.70072	6.23602
GPR62	4.39394	4.19647	4.40238	4.33524	4.59866	4.07367	3.8058	4.46173	4.15781	4.27314	4.28072	4.06743	4.27892	4.505	4.05267	4.81621	4.61384	3.75986	4.41268	4.20294	4.06609	4.85268	4.76545	4.43007	4.05184	4.35718	4.30718	4.14913	4.11141	4.00704	4.22609	4.49697	4.36857	4.14857	4.39386	4.41657	4.66107	4.3012	4.52132	4.10577	4.24343	4.09963
SUV39H2	7.61332	7.72629	6.99703	6.1475	6.80129	7.53648	7.28539	7.38376	7.45638	6.72914	6.82186	7.22992	7.04879	6.9751	7.27267	7.05988	7.44761	7.07052	7.40385	7.09798	6.96665	7.53225	6.03394	7.26758	6.52176	6.67155	7.11136	7.15594	7.44008	6.7738	7.10778	6.44866	6.77979	7.24657	6.52089	7.18106	6.52103	6.86126	6.7574	7.06505	7.08369	7.08975
ZNF70	4.25661	4.45513	4.3462	4.72979	4.52466	4.33461	4.41964	4.52418	4.17497	4.40944	4.41619	4.36983	4.42546	4.17376	4.4132	4.64979	4.19461	4.24878	4.60517	4.63196	4.47527	4.40064	4.69928	4.27808	4.41514	4.3993	4.34273	4.37735	4.50857	4.43817	4.29313	4.49026	4.39296	4.55858	4.36712	4.42102	4.0634	4.51758	4.40494	4.48375	4.06959	4.33014
MYO18B	3.14676	3.19507	2.98829	2.78082	3.45336	3.00314	2.77567	2.99657	3.17828	3.22596	3.00497	2.80191	3.06073	3.06626	3.03271	3.38034	3.18547	2.88331	2.8448	3.05514	3.06073	3.06204	3.17356	2.92603	2.80861	2.79979	2.69702	2.97748	2.71846	2.8982	2.82901	2.78331	2.98039	2.79979	2.95779	2.92418	2.9905	2.80142	2.98897	2.8396	2.81834	2.52747
ETFBKMT	2.74872	2.69236	2.85756	3.03925	2.84383	3.03406	2.31001	2.62498	2.6423	2.60003	2.71991	2.51651	2.87415	2.99496	2.72238	3.08368	2.81789	2.7713	2.38341	2.5888	2.78383	2.73442	2.86983	2.72106	2.43552	2.82937	2.48896	2.45549	2.66701	2.57426	2.50269	2.49373	2.67114	2.86537	2.64714	2.66799	2.42804	2.54726	3.43559	2.5542	2.61785	2.52348
DRC3	2.85952	3.15517	2.86045	2.71087	3.4306	2.94225	2.97306	3.2664	3.29685	3.01182	2.95476	3.05293	2.94765	3.1142	3.04384	2.97212	3.39888	2.7986	3.20493	2.94578	2.96474	2.95247	2.91018	3.0328	2.85545	2.8367	3.15645	2.75465	2.83211	3.02192	2.73067	3.23231	3.0519	3.0843	3.10764	3.05313	2.98932	3.0924	2.95456	3.01938	3.05015	3.07767
TTC30B	3.52834	3.81324	3.57714	3.46482	3.37364	3.75839	3.11356	3.41054	4.35639	2.62976	2.34049	3.73945	2.81537	2.6484	4.12577	2.9296	4.35597	3.43643	3.45635	3.51276	4.17587	4.04306	2.49604	3.42688	2.94187	2.57968	3.91903	3.51031	3.2355	3.34069	3.8133	3.11582	3.24702	3.63638	4.19999	3.15896	2.59801	4.21526	3.0052	3.62863	2.67833	2.85839
LENG9	3.68676	3.68163	4.05306	3.73721	4.12823	3.62145	3.95632	3.61426	3.7556	3.71423	4.13748	3.51748	4.29528	4.24265	3.64503	3.87206	3.88553	3.72898	3.8342	3.71537	3.32118	4.02294	3.86316	3.84267	3.49371	3.80712	3.92246	3.91166	4.37304	3.74911	3.68966	3.73221	4.11185	3.8124	3.84896	4.01204	4.21432	3.75998	4.3011	3.48961	3.96223	3.83046
PCAT4	2.96	3.03697	2.88722	3.87724	3.18979	2.88394	2.90776	3.16002	3.14445	2.75356	3.42452	2.73683	3.22054	3.05287	3.19851	3.55245	3.11748	3.05096	3.28907	2.9904	2.81651	3.67457	3.09723	3.26761	2.74733	3.10123	3.08812	2.90607	2.82017	3.0903	2.65528	3.46348	3.5187	2.83621	3.38944	3.40925	2.77032	3.12585	3.0728	3.12045	2.91695	3.08148
SYMPK	6.28589	5.73546	6.33086	8.28928	5.78952	6.44826	6.73921	5.89542	6.23571	7.42467	6.28557	6.03968	6.74563	7.31548	6.42252	6.05998	5.92597	6.60987	6.11553	5.40396	6.13011	5.85734	5.26429	6.02879	6.42095	7.7841	6.00662	6.10802	6.54628	5.81852	6.23402	6.28131	7.80005	6.95421	7.68024	7.62178	6.6946	7.15904	8.16046	5.60731	7.09937	7.52539
LIG3	6.73781	6.5129	6.64726	5.86446	5.9243	7.29724	6.5734	7.54247	6.2141	5.50447	6.49839	6.41761	6.50513	6.16821	7.3664	5.75507	7.00763	6.41714	6.70256	6.46851	7.14852	6.22771	6.04382	6.24028	6.37109	6.55362	7.03478	6.60986	6.63042	6.53693	7.26121	6.37513	6.81319	6.745	6.60414	5.85616	6.56946	6.36839	5.50953	5.44886	5.91885	6.79077
NKAIN2	2.28207	2.27163	2.66052	2.33402	2.49474	2.33689	2.34577	2.30658	2.74425	2.28065	2.36262	2.249	1.978	2.58021	2.29236	2.39539	2.60661	2.25248	2.35512	2.35641	2.55064	2.56075	2.33995	2.57353	2.1925	2.41712	2.59167	2.38239	2.34577	2.39686	2.13972	2.15535	2.41778	2.35379	2.37781	2.62051	2.22612	2.20812	2.81109	2.33708	2.30936	2.15041
LOC100287896	4.46058	3.66225	5.05952	4.2512	4.68547	5.11904	4.663	4.99279	4.2848	3.74191	5.00013	4.48045	3.70691	3.70948	3.98383	4.13145	4.60737	4.47207	4.58237	4.1295	5.0965	4.43263	5.13207	5.03323	4.218	4.20006	4.97027	5.1052	4.20154	6.32166	5.13576	4.05854	3.72677	4.44726	3.554	4.56713	3.67497	5.08378	4.07797	4.90416	4.22838	4.02652
ASCC1	6.24147	6.56591	6.07043	5.11537	6.49444	6.73318	6.11092	6.39413	6.50757	5.93264	6.07946	7.178	6.39316	5.19894	6.74333	6.10141	7.16224	6.65337	5.96216	5.65157	6.83362	6.59494	5.98757	6.54229	6.70665	5.9553	7.03315	6.84099	6.49853	6.99148	6.26832	6.19052	5.79625	6.45945	6.11847	5.67645	6.29642	6.53172	4.25696	6.57682	6.19304	6.22467
ZNF57	6.51449	7.59103	7.19249	6.04735	7.01308	6.40525	6.01247	6.66796	7.39014	6.54688	6.84463	5.97504	6.71105	6.73071	7.57276	6.49091	7.39949	6.75113	6.90258	6.02163	6.09689	6.58323	5.85411	6.46175	5.08967	6.94919	6.82549	6.76306	7.25072	6.2144	7.46869	6.69524	6.49946	6.42501	6.60863	6.97372	7.20355	7.59515	7.05648	6.36563	7.37787	7.09137
NPAS3	4.10312	4.35315	4.67093	3.97408	4.83592	3.85691	4.25953	4.47361	4.36182	4.10501	4.1524	4.04425	4.11116	4.3643	4.28164	4.45264	4.35868	3.87835	4.3898	4.18557	3.79068	4.29749	4.3841	3.90943	4.06712	4.30879	3.97035	4.21572	3.92292	4.0869	3.81191	4.33464	4.03105	3.85656	3.97999	4.10884	4.47791	4.29514	3.923	3.97418	4.18199	3.96355
RNF32	3.4775	3.1857	3.01797	3.11084	3.23224	3.43725	3.02255	3.39941	3.15218	3.30186	3.48035	2.90037	3.34875	3.17937	3.29572	3.42611	3.40709	2.95996	3.0903	3.24699	3.28984	3.53724	3.41084	3.13686	3.19876	3.11084	3.17933	3.19708	3.51502	3.22664	3.26303	3.23719	3.73762	3.15801	3.38309	3.27274	3.11654	3.43867	3.27027	3.20551	3.51618	3.16646
RPRML	4.21737	3.63688	5.12643	3.93787	3.4603	3.43115	3.96519	3.93294	4.0533	3.88071	3.96099	3.79816	3.68531	3.90906	3.54716	3.55722	3.61189	3.67457	3.70991	4.41514	3.3608	3.46632	3.94799	3.63956	3.37676	4.07255	3.86511	3.80434	3.56708	4.12802	3.55838	3.70895	3.51498	3.79778	3.61606	3.69389	3.67226	3.6906	3.55058	3.47242	3.9966	3.81786
CFAP61	3.65152	3.70785	3.62477	3.96192	4.05497	3.65913	3.87159	3.69796	3.98276	3.92322	3.62338	4.19442	4.04824	4.23393	3.5994	3.6272	3.74269	3.67173	3.70633	3.57402	3.56486	3.40326	4.19039	3.67005	3.67137	4.33323	3.44972	3.50909	3.41354	3.86446	3.50364	3.66229	3.69642	3.9065	4.03746	3.64621	3.96122	3.48328	4.48761	3.7771	3.81995	4.24478
METTL8	6.35522	6.76798	6.71838	6.29678	5.9657	6.34296	6.55678	6.42505	6.31351	5.99009	5.75512	6.85626	6.35012	6.14699	7.19105	6.44547	6.66004	6.98909	6.70434	6.34079	6.7229	6.70644	5.68578	6.5214	6.16779	6.20992	5.99868	6.33106	6.62915	4.71165	6.04008	5.69235	5.61013	5.77726	6.10256	5.76545	5.4019	6.04856	5.50038	6.45969	5.96136	6.19936
FAM151A	3.55289	2.95519	3.43783	3.41125	3.52687	2.97283	2.96076	3.61346	3.54842	3.32065	3.22702	2.98623	3.02459	3.16707	3.33889	3.60681	3.44619	3.28194	3.51096	3.26842	3.23634	3.24354	3.30331	3.19975	3.03809	2.84999	3.02629	2.8624	2.96075	3.18902	3.07637	3.18646	3.01811	3.16027	2.96727	2.79494	3.44001	3.11602	3.11602	3.07501	2.98494	2.88181
SYCE1	2.46953	2.42816	2.40644	2.46054	2.49019	2.34928	2.39373	2.39663	2.32298	2.4164	2.65851	2.10502	2.70959	2.3727	2.37622	2.50195	2.34183	2.18302	2.31453	2.29625	2.34292	2.20978	2.37491	2.36144	2.20533	2.17408	2.60338	2.29538	2.13264	2.16043	2.03562	2.31655	2.30431	2.4356	2.13615	2.19847	2.16643	2.08557	2.52721	1.95343	2.21329	2.31011
CCDC187	4.01225	3.99717	3.95599	4.18137	4.34781	3.78153	4.19292	4.32479	3.91437	4.04249	4.195	3.86695	4.10287	4.59893	3.82084	3.98227	3.98324	3.83048	4.02336	3.91252	3.80009	3.99717	4.33788	3.91174	3.88966	4.22355	3.98869	3.90788	3.88252	4.15752	3.75203	3.97735	4.04965	3.98594	4.15883	3.90382	4.22787	4.04801	4.35438	3.86986	4.01487	3.97549
NLGN4X	3.09573	2.98544	2.74468	3.10282	3.15106	3.07463	3.11141	3.10748	3.15356	3.0335	3.41674	3.44658	3.16837	3.27024	2.7887	3.30646	3.20704	3.22368	3.28866	3.40118	3.00545	3.56057	3.3283	3.3176	3.22628	3.08096	3.10661	3.18177	3.15254	3.15451	3.43192	2.97264	2.92862	2.83962	3.14491	3.2016	3.3176	3.17967	3.29009	3.26142	3.12246	3.12942
NALCN	2.62702	2.71235	2.6095	2.79914	2.66473	2.34212	2.66699	2.49912	2.6981	2.61693	2.98015	2.35754	2.6083	2.58371	2.74037	2.54812	2.55193	2.23639	2.60214	2.50675	2.58933	2.47319	2.48508	2.61261	2.38212	2.35755	2.67556	2.5512	2.43522	2.69718	2.30097	2.6501	2.47692	2.73073	2.5234	2.79796	2.48239	2.2719	2.88392	2.36554	2.38371	2.50199
OR2L13	2.18472	1.87517	2.16759	2.17545	1.79263	1.99229	2.06945	1.98355	2.0695	2.0684	2.18041	2.05178	2.01208	2.09444	2.1872	1.99043	1.79334	2.09525	2.06969	2.00237	2.10146	2.21497	1.83685	1.98811	2.0364	1.97012	1.96724	2.05093	2.10487	1.88596	1.99042	2.22508	2.06814	2.22508	1.96583	2.02959	1.96029	2.09629	1.85934	2.16504	2.03525	1.94063
SPATA6L	3.23294	3.69819	3.89773	3.97408	3.53725	3.46562	3.52779	3.34817	3.45979	3.38206	3.47019	3.35778	3.45945	3.70405	3.56501	3.51462	3.4041	3.54219	3.75361	3.18019	3.40313	3.45344	3.52972	3.55056	3.60772	3.4193	3.78633	3.45445	3.53425	3.33713	3.47962	3.49543	3.64962	3.72101	3.71872	3.42761	3.4716	3.13375	3.79403	3.68745	3.86344	3.67991
CALHM3	2.76054	2.80676	2.743	2.80037	3.06224	2.72651	2.96491	2.86365	3.04436	2.90954	3.11893	3.02493	2.93222	2.81541	2.78128	2.93901	3.13914	2.58277	2.99364	2.81247	2.65808	2.95375	3.84376	2.95439	2.85138	2.58347	3.02135	2.83766	2.8433	2.75444	2.56804	2.7745	2.90351	2.58247	2.88162	2.77341	3.00005	2.80363	3.02082	2.63763	2.67194	3.09522
GLYATL2	2.61611	2.60072	2.45197	2.50324	2.75911	2.44846	2.64055	2.24275	2.76222	2.57242	2.68439	2.38802	2.59583	2.77204	2.1946	2.66878	2.57433	2.6145	2.48531	2.6894	2.65507	2.90637	2.53182	2.42481	2.37364	2.60139	2.55141	2.44249	2.39039	2.83893	2.60072	2.5266	2.62811	2.57444	2.58926	2.49538	2.52208	2.51732	2.58766	2.60645	2.7898	2.63677
LINC00593	2.63576	2.89257	2.71305	2.893	2.75007	2.82798	2.79647	2.89057	2.47017	2.85204	3.09887	2.5852	2.73902	2.9403	2.89434	2.84734	2.83345	2.7627	2.80083	2.64532	2.73431	2.78517	3.2902	2.72559	2.89478	2.83787	2.8117	2.80718	2.63804	2.61491	2.88964	2.79534	3.00278	2.85782	2.82273	2.93424	2.80142	2.82374	3.01148	2.85043	2.97287	2.54291
LINC02363	2.61513	2.82641	2.8448	3.39048	3.16318	2.55739	3.15694	3.1545	3.18507	3.33532	2.93777	2.80033	2.93034	2.753	3.12129	2.86312	2.9758	3.03681	2.81903	2.92472	2.88787	3.02161	3.47962	3.11311	2.83503	2.97749	2.95899	2.78754	2.83081	2.95842	2.63166	2.77406	3.35829	3.28218	2.98426	3.06918	3.00573	2.89979	3.04834	2.8272	3.32448	3.21829
CLCNKB	4.81435	5.01278	5.18095	4.85264	4.98007	4.91305	5.06882	4.77058	4.69153	5.03373	5.38003	4.77271	5.01982	5.00622	4.42854	4.80285	4.82598	4.87292	4.62647	4.83077	4.58102	4.81159	5.31704	4.65686	4.42212	4.91279	4.8686	4.90503	4.66777	4.80254	4.36062	4.69283	4.77783	4.71232	4.77641	4.84367	4.828	4.66314	5.02331	4.3903	5.1366	4.72812
SRCIN1	4.36527	4.26265	4.34223	4.29342	4.84768	4.11221	4.34038	4.61155	4.41571	4.55198	4.68071	4.28956	4.64694	4.78317	4.34463	4.45645	4.48069	4.37424	4.46509	4.37143	4.42331	4.53634	5.20011	4.3263	4.19866	4.44024	4.53437	4.44559	4.21773	4.38153	4.02665	4.46392	4.79546	4.25332	4.49146	4.2383	4.51721	4.24117	4.88847	4.33071	4.65776	4.17169
UBE2DNL	2.77686	2.7811	3.06959	2.92259	3.11962	2.85721	3.22243	2.89957	2.986	3.03708	2.92302	2.7506	2.90093	2.99796	2.69472	3.23158	2.84461	2.72069	3.25288	2.68538	2.62766	2.65003	3.0213	2.96946	2.71016	2.84182	2.80628	3.01025	2.76099	2.74542	2.73914	2.98717	2.84772	2.85104	2.47685	2.71058	3.29866	2.86607	2.95782	2.62471	2.94607	2.81582
LINC00301	2.78527	2.4854	2.28712	2.70688	2.92389	2.37806	2.32282	2.61071	2.48232	2.52416	2.33333	2.35772	2.65087	2.65923	2.44339	2.40441	2.41086	2.59641	2.46074	2.44651	2.51342	2.71785	2.52544	2.44339	2.12686	2.71476	2.72213	2.44157	2.44879	2.48666	2.33555	2.67973	2.39479	2.41104	2.66688	2.30374	2.73012	2.47314	2.98954	2.20228	2.68425	2.56127
WFIKKN2	3.26466	3.26364	3.66344	3.31767	3.58973	3.16438	3.54815	3.42287	3.42641	3.19282	3.25692	3.4853	3.6094	3.45502	3.487	3.45249	3.57942	3.11355	3.80251	3.63738	3.25017	4.04824	3.45317	3.41126	3.16085	3.43167	3.63621	3.33713	3.5022	3.45783	3.52455	3.21031	3.61173	3.40242	3.41272	3.42131	3.70548	3.30017	3.38251	3.62974	3.67869	3.41857
ZFP42	2.26238	2.41537	2.35296	2.37606	2.36798	2.34695	2.23734	2.32813	2.48043	2.5066	2.61132	2.26273	2.5546	2.57588	2.33909	2.44802	2.25521	2.3381	2.62727	2.1191	2.29985	2.40607	2.51124	2.25576	2.04335	2.21352	2.18615	2.14659	2.39934	2.50146	2.2836	2.3519	2.33369	2.32413	2.49384	2.4461	2.23606	2.20519	2.19758	2.20228	2.51577	2.21778
KLHL30-AS1	3.53409	3.86429	3.47704	3.54369	4.16234	3.72393	3.51797	3.64701	3.64268	3.64605	3.7938	3.24848	3.75557	3.7553	3.56179	3.46499	3.78806	3.40074	3.36345	3.77853	3.39622	3.68106	3.61304	3.64689	3.44885	3.83482	3.73637	3.67302	3.53952	3.46186	3.18097	3.66209	3.96688	3.59824	3.53505	3.87144	3.80266	3.58472	4.06915	3.37105	3.74761	3.67459
DPP6	3.59461	3.43426	3.96552	3.88795	3.73838	2.97207	2.90556	3.75645	3.57527	3.55602	3.35605	3.44062	4.05589	3.43749	3.46127	3.5079	3.38462	3.43662	3.85095	3.64494	2.92164	3.99168	3.84643	3.36855	3.55268	3.29416	3.20612	3.754	3.30044	3.55346	3.28895	3.41386	3.64132	3.73383	3.38143	3.45344	2.86577	3.34434	3.38907	3.58724	3.94254	3.52614
SYT16	1.7968	1.95338	1.98194	2.24048	2.36818	2.00673	2.13675	2.02562	2.0049	2.18389	1.96372	1.95389	2.13065	1.81051	1.98938	2.06414	2.18632	2.0256	1.94995	2.11537	2.00511	1.99242	2.16734	2.0238	2.16608	2.21415	2.18798	1.98933	1.84216	2.05634	1.80101	2.12559	2.21639	2.2525	2.34149	1.97827	1.87659	1.9535	2.16402	1.88314	1.99786	2.06156
RAB39A	3.53934	3.28704	3.59548	3.56429	4.06262	3.32093	3.35675	3.4131	3.42827	3.25733	3.58589	3.48805	3.47513	3.10867	3.23212	3.48154	3.30563	3.27139	3.31325	3.4241	3.43585	3.5302	3.24277	3.47466	3.21061	3.33274	3.41057	3.07535	3.25032	3.46148	2.92349	3.48044	3.46513	3.07794	3.53264	3.54332	3.25889	3.432	3.53505	3.33513	3.14681	3.26862
FNDC9	2.35905	2.79144	2.40591	2.40105	2.70917	2.37538	2.30037	2.48306	2.50669	2.33429	2.45978	2.36694	2.48071	2.22018	2.29121	2.53517	2.63155	2.45357	2.27089	2.37892	2.39362	2.95582	2.86437	2.432	2.33723	2.86466	2.3661	2.46266	2.36284	2.46354	2.20485	2.4655	2.65152	2.4889	2.53576	2.55424	2.37892	2.44288	2.7524	2.52706	2.51782	2.32711
TRIM72	3.41462	3.29127	4.81461	3.31877	3.31703	3.30118	5.73239	3.44633	3.12809	3.34922	5.32647	3.24905	3.11999	3.4441	3.3375	3.39547	3.52267	3.29967	3.51508	3.49122	3.28568	4.61201	3.90522	3.44807	3.44608	4.44202	3.33207	3.29676	3.42167	3.57752	3.17484	3.53912	3.8109	3.27468	3.54273	3.7863	3.35513	3.56226	3.43092	5.75653	3.37234	3.36628
CLDN19	5.29272	5.61015	5.34939	5.53986	5.95546	5.23181	5.39063	5.28929	5.36944	5.30878	5.70502	5.05359	5.38738	5.35273	5.08746	5.73458	5.62136	5.39133	5.10101	5.13429	5.24295	5.38995	5.60752	5.50113	4.89243	5.48569	5.60344	5.343	5.13145	5.37841	5.09226	5.45837	5.55827	5.25131	5.4421	5.45982	5.28824	5.23309	5.56788	5.24982	5.41363	5.06049
FBXO8	6.65712	6.7128	6.73479	5.48712	6.94715	6.3842	6.20544	6.0278	6.69769	5.98607	5.82155	6.71934	6.04578	5.23142	6.43927	6.92957	6.75015	6.8043	6.94232	6.72001	6.60326	6.42398	6.23483	6.855	6.22941	5.24628	7.08934	7.06577	6.18466	7.16814	6.4893	6.82411	4.93239	5.77916	5.33882	5.52771	5.73933	5.91597	4.96595	6.68335	6.08686	6.23732
LOC389199	5.92126	5.60504	5.70293	5.91263	6.07712	5.70563	5.65341	5.78104	5.81816	5.94527	5.85786	5.32923	5.7394	5.84725	5.59732	5.81616	6.02232	5.81955	5.81825	5.58401	5.68502	5.98838	5.91575	5.79734	5.57788	5.99547	5.78616	5.64445	5.76578	5.7119	5.56554	5.90209	6.27857	5.81889	6.09255	5.80028	5.76889	5.70216	6.16035	5.6769	6.03035	5.79387
CLDN20	2.41347	2.35135	2.35313	2.54326	2.51803	2.45284	2.23459	2.38703	2.4121	2.44892	2.49065	2.477	2.55415	2.54589	2.34703	2.63084	2.58533	2.36104	2.35864	2.35313	2.30812	2.59386	2.0628	2.34629	2.43139	2.39106	2.28426	2.42656	2.41244	2.42469	2.316	2.61849	2.3988	2.43733	2.3561	2.50994	2.44189	2.30284	2.41868	2.49082	2.28559	2.42724
CIDECP1	2.67404	2.78533	2.89097	2.62989	2.76156	2.5583	2.61781	3.00514	2.81636	2.87521	2.68671	2.88499	2.77739	2.55856	2.80261	2.96175	2.71225	2.61262	2.75982	2.87638	2.60233	2.94333	3.03668	2.62901	2.81782	3.07709	2.79465	2.56373	2.76024	2.95761	2.70392	2.88724	3.08026	2.77434	2.61459	2.73132	2.55586	2.67403	2.83368	2.55375	2.68966	2.82315
SLC12A1	3.23394	3.04176	3.29964	3.51513	3.82925	2.96781	3.01695	3.2303	2.97252	3.07761	3.05168	2.94019	3.1883	3.56994	3.02525	3.08105	3.19751	2.96951	3.07676	2.83031	2.97602	2.9178	3.44642	3.15432	2.70358	3.26129	3.08108	3.08312	2.87353	3.0611	2.86911	3.24112	3.28877	2.9461	3.09465	3.26288	3.43551	2.89955	3.38894	2.72952	3.51459	2.94637
KIAA1257	4.64559	4.52735	4.71313	4.1329	5.16038	4.94633	4.48289	4.15112	6.55346	5.00041	4.93902	5.09562	3.97266	5.58667	4.67646	4.14279	4.57474	4.4826	5.25056	3.53928	5.65607	4.49982	4.7082	5.21289	4.72244	4.38633	4.77806	4.60309	5.02256	4.03488	4.75825	4.68859	4.29005	5.07171	5.40032	4.12056	6.14729	6.02243	4.39441	4.14778	5.98583	4.24315
PRR16	4.12943	4.42959	3.65119	3.89876	4.24603	4.48353	3.60843	4.32032	4.07436	4.2066	4.2266	4.67586	3.86149	3.98591	4.41683	4.42824	4.26449	4.1822	4.10439	5.34354	3.95546	4.72502	4.17244	4.41868	6.59624	4.39228	4.02415	4.42592	4.0893	4.17855	4.55205	4.46984	3.87133	4.34346	3.80392	4.1169	4.33092	3.99702	3.83919	5.04575	3.51917	4.01354
HMGCLL1	2.56878	2.78594	2.80992	3.55989	3.28306	2.88191	2.74239	3.07774	3.35161	3.16067	2.99574	3.02092	3.24834	2.81382	2.859	3.13028	2.94389	2.63848	3.05821	3.03448	2.81751	3.02378	3.06974	3.14055	2.8437	2.96324	3.03429	2.94927	2.74405	2.8921	2.5558	2.84282	3.38601	3.14041	3.16259	2.8084	3.01502	2.97562	3.40998	2.96645	2.81228	2.97768
S100Z	2.6272	2.78981	2.60874	2.58616	2.55639	2.3513	2.48835	2.64224	2.49933	2.69897	2.52856	2.38734	2.75828	2.76683	2.61347	2.52411	2.62994	2.49933	2.2765	2.62525	2.3742	2.56677	2.70119	2.45247	2.64255	2.56856	2.4365	2.54695	2.56373	2.56109	2.49815	2.58812	2.83361	2.50694	2.55227	2.43393	2.72403	2.3794	2.72819	2.4552	2.70222	2.68139
MYRF-AS1	4.9394	4.94945	4.95473	4.75453	5.32681	4.53641	4.66643	4.72621	4.63664	4.91575	4.7481	4.65931	4.93731	4.8906	4.81156	5.04228	5.178	4.8399	4.71264	4.89366	4.62586	4.80829	4.89506	4.83014	4.61282	5.03487	4.71281	4.88098	4.56018	5.03743	4.45311	4.9758	4.94224	4.83607	4.84078	4.95002	4.74733	5.16609	4.92803	4.66567	4.90306	4.69036
EMSLR	2.33954	2.49891	2.74394	2.54852	2.62309	3.01353	2.28519	2.79828	2.50529	2.60573	2.50968	2.67175	2.34661	2.53784	2.92306	2.42647	2.61105	2.74394	2.49832	2.42157	2.36738	2.47266	2.42509	2.98173	2.43213	2.32064	2.67175	2.34399	2.62035	2.43774	2.18133	2.47513	2.62186	2.72853	2.61803	2.08579	2.57389	2.54804	2.49419	2.66816	2.46388	2.42287
LINC01580	3.11369	3.16881	3.09112	3.05329	3.16552	2.89672	2.85729	3.125	3.08824	3.32663	3.44165	3.15128	3.20467	2.97634	3.01942	3.09072	3.02738	2.92093	3.0138	3.05742	2.99066	3.10204	3.27248	3.15274	2.98052	3.36957	2.90173	2.94123	3.13026	3.18079	2.9989	3.22486	3.1905	3.3008	3.27426	3.48405	3.15363	3.28749	3.30082	3.30621	3.04419	3.14358
PCBD2	5.31548	5.23763	6.29604	5.06839	5.796	5.71084	5.16767	5.39011	6.59229	5.7647	6.69479	6.03188	5.49634	5.96059	5.16413	5.07052	6.7937	5.60083	6.21372	5.71562	5.50765	6.1588	5.57679	5.4144	5.02526	5.40308	5.69871	6.87068	6.43897	6.52407	4.96831	5.58627	5.30947	4.89683	4.72687	5.81274	4.55087	5.17888	4.86633	5.57901	6.17101	5.49405
RHBDL2	4.864	4.0028	3.62978	3.72806	6.12045	2.85281	4.30537	5.47792	5.72905	3.81622	4.73682	3.85238	4.62359	3.32232	4.45506	5.19314	5.36779	5.16019	6.17749	3.22097	3.36959	5.24185	5.44964	5.04671	4.09658	4.24704	6.66353	4.0374	3.71538	4.27336	4.76959	3.56221	4.68922	4.77589	3.9051	4.26102	3.75166	3.36868	4.49906	4.16061	4.89815	4.1936
HYDIN	2.20694	2.3923	2.4002	2.30445	2.37404	2.35725	2.10313	2.25322	2.18975	2.48944	2.41522	2.34951	2.14997	2.65578	2.20955	2.43928	2.37976	2.20955	2.32638	2.25759	2.16798	2.30955	2.55372	2.28771	2.2004	2.30692	2.08628	2.3503	2.27258	2.30692	2.26118	2.48598	2.30569	2.13177	2.17966	2.28792	2.42804	2.41314	2.24984	2.20857	2.35725	2.37538
ABCC11	4.04328	4.19351	3.8455	4.48028	4.53899	4.17861	4.04599	4.11831	4.27719	4.02202	4.40543	4.12646	4.34909	4.05	4.38258	4.1752	4.70196	3.82427	3.9324	4.14405	3.85307	4.38379	4.26129	4.26395	4.07298	4.55707	4.00129	3.84316	4.21843	4.00955	3.96091	4.03705	4.56411	3.85844	4.31801	4.41861	4.00753	3.94934	4.43212	3.9775	4.12331	4.07814
PLA2G4D	2.74327	3.30341	2.80757	3.08303	3.0258	2.94351	3.11756	3.28131	2.97588	2.73536	2.79634	2.64702	3.1177	2.96844	2.74037	2.90513	3.12196	2.98228	2.7503	2.91438	2.65262	2.8918	3.04638	2.87402	2.89219	2.85193	2.79875	2.83461	2.86308	2.98799	2.89875	2.73085	2.87848	2.76033	3.22838	2.65551	2.90119	2.79915	3.0728	2.78445	3.03378	2.82736
ZSWIM2	1.95612	2.21212	2.2056	1.84709	2.48809	1.92038	2.04891	2.21045	2.05744	2.18074	2.1936	2.05498	1.99036	1.91809	1.93471	2.00271	2.06393	1.98028	2.32233	2.12007	1.88282	2.03742	2.2391	2.11197	2.07791	2.3872	1.97271	2.20324	1.95233	2.15003	1.88851	2.04411	2.31084	2.05983	2.22431	2.45306	1.99095	2.09548	2.20014	1.9061	2.15003	1.95793
EXOC3L1	4.55109	5.06714	5.34949	4.73489	5.35447	4.42268	4.99446	4.73887	4.81992	4.73436	4.89304	4.95995	4.85877	5.07105	4.99418	4.86033	4.91012	4.49231	4.88223	4.82783	4.88055	5.143	4.64931	5.09952	4.69258	4.90012	4.98393	5.03514	4.58791	4.54673	4.75781	4.98209	4.56122	5.01396	4.71165	4.87192	5.17419	4.95411	4.62206	4.62238	4.70798	4.91244
FAM230I	3.14702	3.25088	2.91064	3.17454	3.53456	2.94342	2.89907	3.41629	3.42794	3.36976	3.45329	2.88393	3.25743	3.26472	2.95019	3.42148	3.10181	3.11994	3.30384	3.14414	3.03074	3.42078	3.75087	3.26573	2.80722	3.24546	3.13163	3.10967	3.30269	3.24036	2.9885	2.97881	3.24397	3.06137	2.97982	3.28605	3.13028	3.05243	3.24834	3.00767	3.69014	3.25318
KLHL14	3.95755	3.9924	3.9959	3.92141	4.35935	3.71321	4.04071	3.91874	4.2241	4.07009	3.99375	3.87501	4.06368	4.39323	4.07357	3.9831	4.31272	3.86493	4.02702	4.24342	3.92278	3.92904	4.60056	4.23906	3.92141	4.03714	4.04567	4.1712	4.00223	3.98087	3.71452	4.02471	4.2278	4.49416	4.26448	4.25012	3.95076	3.83975	4.24649	3.87578	4.04999	3.95895
TSPEAR-AS2	4.4515	4.48328	4.58084	4.39072	4.94073	4.2529	4.54435	4.62734	4.41571	4.46098	4.68136	4.2588	4.77322	5.01392	4.55278	4.80613	4.04328	4.56699	4.29597	4.31895	4.51936	4.28131	4.63897	4.5235	4.47421	4.35279	4.38497	4.53525	4.41149	4.48782	4.53124	4.2827	4.83004	4.76881	4.52809	4.3064	4.69388	4.11216	4.59562	4.55105	4.9114	4.45447
CCDC190	2.08543	2.36281	2.17147	2.35994	2.15827	2.02556	2.20144	2.24275	2.04903	2.14889	2.51774	2.0663	2.21042	2.24313	2.32019	2.25573	2.6415	2.16062	2.1675	2.32466	2.26208	2.07597	2.23885	2.36633	2.31112	2.06863	2.03462	2.1746	2.14791	1.99621	2.1817	2.28394	2.09749	1.99855	2.12223	1.98948	2.19702	2.07605	2.06203	2.02921	2.40379	2.06701
PDILT	2.70687	2.95534	2.87291	2.91229	3.09916	2.61692	2.57244	2.8851	2.74494	2.90062	2.81833	2.89055	2.70201	2.91599	2.63343	2.86911	2.7746	2.63222	2.91368	2.69043	2.54929	2.76049	3.04426	2.77241	2.77792	2.68223	2.64137	2.97056	2.80161	2.87959	2.5849	2.6515	2.64305	2.56531	2.82263	2.819	2.9133	2.72057	3.49726	2.77774	2.73003	2.70373
LINC00051	2.27597	2.35795	2.16281	2.62176	2.79358	2.22105	2.56973	2.32482	2.33209	2.53485	2.41118	2.25174	2.40951	2.06462	2.17814	2.36275	2.43746	2.31096	2.41734	2.19757	2.33466	2.46064	2.35341	2.42567	2.22412	2.3856	2.60024	2.36366	2.4306	2.5031	2.40398	2.41962	2.49951	2.29205	2.30791	2.16326	2.33848	2.20274	2.77128	2.34159	2.30232	2.25174
LKAAEAR1	4.81339	4.89927	5.01677	4.80861	5.44003	4.4605	4.86747	4.60866	4.73307	4.98731	4.8326	4.57197	4.57564	4.77698	4.7606	4.86968	4.89597	4.94749	5.02783	4.68909	4.81063	5.00694	4.89554	4.91168	4.4386	4.7983	4.83191	4.56312	4.55657	4.79679	4.415	4.97981	5.02129	4.65977	4.96266	4.81908	4.97244	4.8384	5.28839	4.61455	4.84701	4.74591
LINC00317	3.26916	2.9523	3.23464	3.15763	2.92558	2.94698	2.93083	3.31602	3.2695	3.10749	3.33987	2.96191	3.40287	3.21206	3.25012	3.11845	3.31694	3.15616	3.3056	3.04846	3.16026	3.38108	3.13871	2.96392	3.12027	3.15538	3.01316	3.02408	3.00243	2.90061	3.05996	3.00648	3.31262	3.41256	2.74471	2.88874	3.21336	2.82473	3.08302	2.94932	3.05488	3.12242
RASGRF1	3.59378	4.08674	3.85624	3.8558	4.44736	3.27543	3.7592	3.64963	3.38313	3.68322	3.86944	3.4785	4.06004	3.74833	3.29061	3.78789	3.6248	3.43487	3.56981	3.43532	3.73521	3.42519	4.25369	3.79928	3.313	3.66818	3.51477	3.8972	3.45133	3.84074	3.35772	3.631	4.1745	3.66587	3.83108	3.5889	4.3982	3.7543	3.89196	3.39478	4.1686	3.77737
LOC403312	2.07367	2.11298	2.167	2.21837	2.076	1.90586	2.04139	2.02669	2.12215	2.13276	1.94604	2.11467	2.07445	2.10298	2.12382	2.15036	1.97387	2.04625	2.23233	1.96618	2.34058	2.07732	2.08323	1.9513	1.94713	2.14805	2.17612	2.22321	1.96169	2.2695	2.07562	1.92058	2.05784	2.02153	2.10662	2.03975	2.04882	2.00753	2.65334	1.9345	2.13904	1.92792
WDR66	3.58471	3.8474	3.5844	3.63928	4.42199	4.03673	3.93381	4.00723	3.42153	3.85078	3.92921	4.42694	4.53608	3.74174	4.04918	3.66928	4.14088	3.65776	4.69354	3.95477	4.18053	3.73306	3.60219	3.68763	4.34035	3.96506	4.04358	3.62196	3.95224	3.73197	3.88577	3.97408	4.06592	4.08848	3.77902	3.93939	3.83932	3.94501	3.99421	3.61087	3.68807	3.4753
OR2C3	1.85738	2.11062	2.13624	2.18674	2.25576	2.01255	2.2485	2.28223	2.0628	2.1542	2.06157	2.07215	2.30769	2.07746	1.83353	2.03445	2.06589	2.02105	1.96396	1.84749	1.92503	2.05659	1.9338	2.41775	2.04729	2.10801	2.08628	2.08841	2.01998	2.02771	2.08181	2.00019	2.00841	1.82512	2.02641	2.16259	1.96126	2.04231	2.61959	1.9363	1.96065	2.17509
ARHGAP20	2.98483	2.87587	3.84749	3.62102	3.91142	3.19343	3.27454	3.68755	3.46858	3.53722	3.22456	3.4188	3.43586	3.37519	3.18809	3.52542	3.36307	3.1964	3.03815	3.58803	3.22355	3.4497	3.68217	3.28024	3.18459	3.33085	3.62687	3.13422	3.3453	3.48255	3.30191	3.27258	3.33085	3.26761	3.75294	3.69734	3.28399	3.44306	3.36662	3.55097	3.55331	3.15506
SCARF1	4.08069	3.99174	4.01855	4.12151	4.44455	3.74499	3.88543	4.04493	3.91665	3.74166	4.16439	3.9573	3.99217	4.12784	4.22669	4.12801	4.34464	4.16563	4.03409	4.25827	3.9835	4.20775	4.29146	4.0975	3.87972	4.17066	4.05405	4.02061	3.93057	3.97578	3.861	4.19737	3.95242	3.99492	3.90444	4.22783	4.65816	3.85249	4.20723	3.91693	4.03052	4.05013
TMEM26	1.93321	2.02746	2.06275	2.03854	2.29553	1.82011	1.93094	2.02669	2.10886	2.07116	2.06569	1.85234	2.35762	2.00303	1.98938	2.0959	2.1072	2.30413	2.13354	1.92487	2.21952	1.98009	2.21619	2.01022	2.06975	2.35599	2.01068	2.04991	1.98108	2.08731	2.16493	2.13476	2.07987	1.8872	2.29224	2.02959	1.97557	1.99835	2.19837	2.09101	2.22181	2.09035
LINC00612	2.19796	2.19448	1.98302	2.34276	2.63743	2.26818	2.26691	2.26984	2.27567	2.36705	2.32245	2.20418	2.31859	2.20718	2.25478	2.51369	2.54828	2.07874	2.27072	2.26808	2.26079	2.34034	2.37409	2.36546	2.08064	2.2522	2.0636	2.16258	2.09415	2.18384	2.15482	2.25945	2.19948	2.33895	2.55795	2.45421	2.33066	2.31012	2.32245	2.19709	2.25745	2.37538
NAGA	7.57093	7.25503	7.55831	7.06046	7.34315	6.8928	6.83407	7.64678	7.29439	7.46916	7.23495	7.8427	7.43315	7.156	7.56804	7.46016	7.06142	7.4045	7.54971	7.67992	7.05175	7.35335	7.02526	7.46563	7.26263	7.2521	7.45982	7.49996	6.57581	7.71346	7.41819	7.79706	7.06874	7.2443	6.54587	6.71753	7.66546	7.27867	7.48342	7.54794	7.38342	6.57466
LHFPL5	2.61732	2.53208	2.71552	2.56067	2.90495	2.39648	2.54167	2.60089	2.45614	2.65358	2.82079	2.60326	2.79848	2.67839	2.40743	2.80325	2.73284	2.49902	2.58956	2.69142	2.43025	2.58391	2.84157	2.59041	2.61784	2.932	2.5031	2.58901	2.54871	2.704	2.54167	2.8907	2.77672	2.42315	2.8229	2.54812	2.4683	2.55241	2.78865	2.57231	2.78662	2.74525
KLHL40	3.36319	3.03884	3.5368	3.04515	3.52975	2.79193	3.1532	3.16567	3.07742	3.47897	3.3655	3.28197	3.01702	3.34144	3.08183	3.62933	3.34612	3.21414	2.97404	2.75189	3.23342	3.29511	3.66206	3.63263	3.04848	2.90068	3.11199	3.03416	3.2506	2.95378	2.93095	2.86962	3.19565	3.59663	3.10529	3.26432	3.42894	3.19096	3.42287	3.37312	3.22544	3.16435
TSPEAR	3.02537	3.00788	3.5996	3.34958	3.30835	3.18648	3.15328	3.31925	3.48847	3.19662	3.27685	2.97594	3.679	3.44116	2.93721	3.13028	3.37805	3.49232	3.2192	3.03668	2.91254	3.26594	3.33452	3.04684	3.02618	2.75913	3.07532	3.21169	3.1909	3.23232	2.99827	3.3133	3.16789	3.02837	3.13133	3.33013	3.28086	2.88519	2.95722	3.06899	3.50202	3.256
RPL13AP17	5.75422	5.74914	5.59086	5.51388	6.20214	5.76171	4.94395	5.69471	5.52297	5.87821	5.8305	5.39988	5.65783	5.45616	5.58628	5.65109	5.89993	5.68694	5.34842	5.58583	5.62658	5.65326	5.64074	5.59204	5.08487	5.41023	5.63941	5.40707	5.3981	5.40351	5.37688	5.65755	5.8947	5.63299	5.45146	5.6905	5.42283	5.59335	5.17769	5.47004	5.30463	5.52659
LINC01657	2.4802	2.43804	2.64833	2.81686	2.69679	2.39872	2.49044	2.72639	2.49795	2.86463	2.6348	2.59988	2.59199	2.74397	2.67885	2.59618	2.71254	2.76479	2.51257	2.77235	2.61272	2.76031	2.68514	2.58938	2.48962	2.57202	2.51238	2.53716	2.5002	2.62715	2.36163	2.44006	2.62555	2.44227	2.69173	2.58032	2.57915	2.61564	2.8213	2.2191	2.55012	2.27124
TMEM182	3.5339	3.82735	3.74254	3.49546	3.51811	3.82203	3.44294	3.66661	4.14857	3.03157	3.5271	3.88642	3.5407	3.26079	3.88396	3.75601	3.44619	3.69325	4.07528	3.65597	3.79558	3.60777	3.46593	3.84579	3.45053	3.18488	3.33713	3.53121	3.26494	3.4424	3.71313	3.94204	3.222	3.33577	3.62229	3.59216	3.01987	3.239	2.96817	3.31393	3.61337	3.17113
STPG2	2.82889	2.98216	3.14495	3.42794	3.32293	3.00261	2.94778	3.17666	3.03001	2.8946	3.28103	2.74998	3.25857	3.22444	2.95169	3.08218	3.60495	3.12203	2.9633	3.20727	2.79837	3.16467	3.38199	3.03163	3.08638	2.93443	2.81579	3.12401	3.17695	3.15918	2.89545	3.14566	3.13219	3.02604	3.25052	3.04115	3.09758	3.23914	3.22058	2.78078	3.17448	3.26552
MPP4	2.64841	2.55304	2.72759	2.66313	2.96838	2.33405	3.02482	2.57309	2.71105	2.63733	2.78211	2.47286	2.64367	2.80225	2.41699	2.71418	2.50314	2.51229	2.70616	2.65648	2.33595	2.46803	2.69527	2.91392	2.60016	2.58725	2.72956	2.6759	2.67279	2.71105	2.17245	2.72811	2.66691	2.52017	2.61833	2.75534	2.67279	2.52137	3.07231	2.21771	2.75725	2.67209
APLF	2.8272	2.73391	2.60058	2.97442	3.3536	2.55739	2.95005	2.79547	2.92621	2.79154	2.86083	2.76053	2.79822	2.66028	2.799	2.84588	2.70861	2.48179	2.88424	2.76138	2.4783	2.85818	2.85111	3.2067	2.64547	2.85607	2.76759	2.62305	2.80955	2.79076	2.76328	2.71279	2.96599	2.75469	3.25179	2.92418	3.04923	2.73782	2.83733	2.88329	2.74772	2.63739
CCDC181	2.57305	2.65687	2.42326	2.66329	2.88102	2.52624	2.36964	2.62722	2.93788	2.42341	2.57595	2.4219	2.45885	2.66502	2.3032	2.59498	2.60535	2.42229	2.5252	2.55692	2.63408	2.60677	2.71348	2.62943	2.40853	2.71942	2.45995	2.32419	2.59335	2.52006	2.24532	2.54049	2.71644	2.50343	2.90785	2.4849	2.67862	2.63913	3.15462	2.41727	2.63753	2.51378
FAM9A	2.3491	2.3617	2.33582	2.36223	2.65834	2.34609	2.4245	2.3421	2.26003	2.42341	2.488	2.56636	2.34943	2.51222	2.33405	2.51343	2.4909	2.36436	2.39911	2.47727	2.19029	2.43043	2.49467	2.58289	2.23099	2.25165	2.25196	2.29537	2.20668	2.40439	2.31515	2.36358	2.15647	2.45588	2.51847	2.30278	2.34642	2.49957	2.56573	2.1705	2.31205	2.31012
TDH	2.73577	2.79006	2.70631	2.5691	3.53505	2.67733	2.61861	2.46353	2.66104	2.6732	2.66527	2.50343	2.66104	2.69096	2.62284	2.69718	3.18556	2.32277	2.74271	2.66811	2.5746	2.66611	2.79858	2.63057	2.301	2.56856	2.6347	2.88322	2.607	2.71061	2.4453	2.75806	2.42896	2.61401	2.72722	2.62284	2.62201	2.41993	2.65942	2.48285	2.58813	2.5856
TMEM74	2.63617	2.26409	2.84033	2.85335	2.9803	2.2472	2.43206	2.7671	2.80549	2.48219	2.45699	2.61033	2.79906	2.81287	2.48434	2.62618	2.75708	2.52276	2.53437	2.52847	2.5821	2.7256	2.60934	2.41463	2.40449	2.55073	2.57816	2.54374	2.5002	2.51681	2.33825	2.75787	2.52062	2.80766	2.69456	2.70663	2.66273	2.72463	2.74779	2.5727	2.5136	2.86045
CALN1	3.4278	3.23751	3.32665	2.93329	3.80353	3.12305	3.62016	3.65925	3.61395	3.37321	3.75916	3.22424	3.21522	3.52966	3.23974	3.58731	3.63895	3.26396	3.14177	3.15561	3.48757	3.1664	3.77824	3.27222	2.94607	3.7151	3.25902	3.2209	3.26208	3.19674	3.21374	2.94082	3.13028	3.17389	3.34017	2.90413	3.70178	2.93602	3.21222	3.31546	3.22286	2.8477
STX19	5.30721	5.99937	4.34956	6.00797	7.25671	3.94632	6.22911	6.31487	7.43413	7.01208	6.76872	5.69431	5.93945	5.42184	6.58279	6.28203	7.06196	5.99728	6.62064	5.67295	5.41403	6.14347	6.7287	5.41648	5.37327	5.79723	6.27546	7.15801	6.08765	7.19868	5.81211	6.88607	6.41076	5.21671	5.04796	6.50008	4.35198	5.98359	6.96569	5.16716	7.62096	5.66342
IGHV7-81	2.35134	2.66694	2.53057	2.48765	2.6423	2.37946	2.63246	2.48765	2.6867	2.24664	2.69585	2.55717	2.65096	2.62194	2.36467	2.47565	2.57395	2.43113	2.63589	2.56455	2.59336	2.59793	2.51569	2.43936	2.34082	2.44451	2.73064	2.49405	2.54099	2.56373	2.46165	2.50169	2.48344	2.4253	2.30142	2.52613	2.41154	2.39883	2.96757	2.44545	2.39149	2.35101
LOC100132686	3.00056	2.72563	2.92586	3.18256	3.58646	3.04006	2.8279	3.05975	2.53878	2.9871	3.15549	2.71887	2.85594	3.15795	2.83805	3.3965	3.13359	3.04761	3.23466	2.94496	2.76713	3.04092	3.13028	3.14551	2.93771	3.27519	3.21628	3.27474	3.05501	2.89791	2.71315	3.18679	2.78311	2.97715	3.09429	2.91311	2.97113	2.88066	2.97143	2.69767	3.12129	2.98465
ST3GAL3	6.56368	6.74839	6.8495	7.32998	7.2012	6.35862	6.75674	6.83197	6.80628	6.62171	7.10356	6.50792	6.73483	6.4508	6.51698	7.24158	6.92966	6.64996	6.82487	6.92833	6.62865	7.26529	6.84664	6.67447	6.56821	6.52001	6.80949	6.60575	6.59367	6.58733	6.6696	6.92433	6.88235	6.63069	7.09243	7.16442	6.37277	6.736	6.96514	6.59112	6.69148	6.74921
LINC00508	2.74037	2.51788	2.66789	2.9111	2.72234	2.68565	2.64127	2.69958	2.28173	2.62603	2.6524	2.57136	2.77588	2.64768	2.49185	2.61781	2.45552	2.5734	2.85969	2.35313	2.52342	2.86038	3.03142	2.7478	2.45755	2.66097	2.75213	2.68183	2.53782	2.63205	2.36874	2.6845	2.69904	2.35901	2.65658	2.67814	2.56991	2.83551	2.82042	2.63789	2.5567	2.64564
MTUS2-AS1	3.13963	3.49856	3.57941	3.42097	3.95167	3.36505	3.61463	3.1834	3.64045	3.38641	3.60959	3.52837	3.89724	3.92832	3.41001	3.46153	3.52676	3.47758	3.77787	3.13028	3.48098	3.66016	3.59611	3.54699	3.32106	3.80086	3.45486	3.52558	3.59372	3.63463	3.44728	3.42604	3.49155	3.05375	3.4927	3.6234	3.61353	3.38641	3.45486	3.51286	3.51435	3.95058
LINC00421	3.55504	3.84419	4.11003	3.7725	3.63744	3.54916	3.64024	3.58172	3.84253	3.61039	3.95104	3.75547	3.86699	3.89836	3.43766	3.7709	3.70686	3.53622	3.97206	3.4125	3.42642	3.60223	3.66587	3.6017	3.62941	3.90822	3.53702	3.75835	3.31934	3.60456	3.55582	3.60538	3.69906	3.47981	3.53505	3.55124	4.03177	3.52269	3.54822	3.24121	3.45267	3.81912
OR8B8	3.32341	3.16935	3.30079	3.25346	3.82227	2.94736	3.4785	3.43554	3.22692	3.42487	3.48757	3.06382	3.28195	3.77491	3.55302	3.48452	3.55023	3.59022	3.36066	3.2958	3.2759	3.47098	3.39394	3.39608	3.20761	3.5879	3.11474	3.109	3.28949	3.28571	3.02657	3.37687	3.66142	3.17024	3.39239	3.38959	3.44316	3.33498	3.26217	3.20429	3.25016	3.28472
CCDC148-AS1	2.22768	2.17913	2.45528	2.19271	2.29365	2.25666	2.20056	2.20442	2.33879	2.29981	2.25437	2.15636	2.29579	2.30517	2.51177	2.33365	2.36391	2.29234	2.2137	2.21228	2.35327	2.14932	2.29839	2.21938	2.39189	2.27316	2.28868	2.27998	2.30746	2.25674	2.21252	2.42399	2.15244	2.45219	2.26678	2.12619	2.53957	2.06675	2.34332	2.30444	2.429	2.37639
B3GALT5-AS1	3.0716	2.96997	3.29782	3.35583	4.20158	2.99179	3.19637	3.1824	3.21868	3.24308	2.97429	2.84661	3.32396	3.18826	3.16556	3.27884	3.31662	3.15408	3.48606	2.86328	3.11962	3.18826	3.52346	3.18223	2.96338	3.34817	2.87399	3.19581	3.03376	3.04315	3.18295	3.34682	3.46095	3.22305	3.03376	3.46617	3.96453	3.22242	3.5021	2.86958	3.1668	3.25733
IQCF3	2.87869	2.97683	3.27405	2.71791	3.07446	2.83437	3.10599	2.91933	2.89126	3.00854	3.16965	3.21394	2.91519	3.05725	3.08319	3.12191	2.74931	2.86146	3.12285	2.89559	2.78616	3.10731	3.13028	2.89999	3.01987	3.30279	3.29339	2.93764	2.89126	3.01987	2.85569	3.02953	3.31863	3.27087	3.10366	2.96445	3.01987	3.21364	3.31489	2.82712	3.10685	3.12356
PTH2	5.42047	5.37438	5.4419	5.57092	6.02149	5.01463	5.28783	5.23799	5.31036	5.30158	5.68073	5.19484	5.38575	5.36898	5.56392	5.50482	5.48058	5.4237	5.40941	5.41286	5.23804	5.73428	5.85774	5.29526	4.97408	5.36093	5.52696	5.40423	5.22278	5.1596	5.28988	5.38922	5.62169	5.30184	5.33678	5.47027	5.54742	5.3021	5.88743	5.09817	5.41054	5.26899
RP1L1	2.858	3.05698	3.14495	2.9403	3.07033	2.8942	2.907	3.15565	3.06397	3.25918	3.09817	2.94506	3.32727	2.88349	3.04368	3.26415	3.26952	3.06689	2.82999	2.90955	2.81508	3.24644	3.05674	3.11219	3.1517	2.54455	4.12617	3.09206	2.95217	2.81235	2.86911	3.16744	3.44598	3.001	3.01364	3.06275	2.8717	2.90821	3.03933	3.09817	3.02069	3.32948
SCN1A	2.43688	2.30422	2.14331	2.58508	2.592	2.20138	2.0399	2.44037	2.35942	2.43488	2.58426	2.42007	2.14999	2.22816	2.45906	2.37459	2.3808	2.43494	2.25487	2.31433	2.31668	2.65532	2.78992	2.20288	2.33723	2.60308	2.14791	2.13976	2.20556	2.47271	2.28564	2.76929	2.84897	2.36029	2.59658	2.57752	2.28564	2.33825	2.62503	2.22578	2.49405	2.08875
EVC2	3.41818	3.62732	3.60088	3.56161	3.87188	3.49861	3.40255	3.40445	3.65883	3.53469	3.57061	3.62415	3.17917	3.59109	3.52668	3.93547	3.46364	3.51908	3.36395	3.43157	3.30647	3.529	3.74514	3.46724	3.22752	3.36464	3.60034	3.20879	3.45336	3.48966	3.47886	3.57529	3.05894	3.33509	3.4076	3.72931	3.65728	3.36506	3.20312	3.48208	3.40917	3.35954
GRID1	4.48027	4.36162	4.46663	4.1329	4.64615	3.8546	4.46423	4.78787	4.71736	4.13527	4.67846	4.50352	4.21452	3.95794	4.3996	4.87551	4.28459	4.30496	4.72846	4.37024	3.8522	4.70272	4.96491	4.39556	4.14733	4.22918	4.15944	3.95314	4.28693	4.44749	4.17849	4.89786	4.39891	4.19717	4.49275	4.73922	4.38662	4.25307	4.28643	4.35447	4.31338	4.44905
ANO1	4.52589	4.7071	4.23873	3.97567	4.57986	4.74983	4.68376	4.54793	4.54956	4.62017	5.02231	4.69494	4.44719	4.62605	5.93605	4.74307	4.54461	4.76495	4.89028	4.92016	4.71111	4.74934	5.24617	5.78913	5.72615	5.08588	6.12485	4.51783	5.9778	4.5875	4.49349	4.701	4.24419	4.66074	4.69458	4.42581	4.64615	4.48199	4.41434	4.56246	4.39991	4.16071
GALNTL6	2.73454	2.88069	2.95202	2.93633	2.95731	2.57349	2.91093	2.57143	3.14968	3.20288	2.9542	2.85445	2.88719	3.0464	2.81445	2.92972	2.70483	2.74779	3.20313	2.84461	2.80324	2.99277	3.06955	2.78824	2.76149	2.93882	2.73065	2.96684	2.81838	2.95309	2.93862	2.90779	2.94868	2.87141	3.06558	2.91808	2.96355	2.8563	3.86327	2.77121	3.13214	2.77256
FBF1	5.29823	4.75074	4.64697	5.54252	4.84078	5.20607	4.58023	5.21807	4.67937	5.42011	5.12974	4.98539	4.39388	5.12587	4.77134	5.08323	5.14454	5.11309	5.39576	4.89699	5.11389	5.2399	4.81072	5.15209	5.12239	5.43454	5.20897	4.78846	5.21341	4.93494	4.9489	4.66614	5.41359	5.89331	5.36262	4.97151	4.69886	5.31535	5.50776	5.04228	5.19008	5.31807
MED12L	2.64129	2.581	2.86646	2.88489	2.97434	2.90565	2.85819	2.9274	3.05287	2.8643	3.07178	2.84322	2.82092	2.7244	2.98879	3.12184	3.32995	2.60444	2.88754	2.87793	2.54812	2.98335	3.11608	2.70292	2.81981	2.91235	2.97443	2.86652	2.67333	2.69718	2.89915	3.16994	2.88735	3.1192	2.7399	2.8595	2.72563	2.87219	2.85764	2.68761	2.73088	2.89191
KCNH5	2.50291	2.60544	2.61306	2.74668	2.6299	2.56792	2.77908	2.3404	2.60198	2.5575	2.43221	2.32797	2.53838	2.84753	2.77838	2.62007	2.34166	2.60613	2.45818	2.32525	2.41439	2.47829	2.97698	2.48826	2.55355	2.8609	2.74092	2.53528	2.5002	2.71515	2.35384	2.54605	2.66366	2.62046	2.51632	2.6462	3.06795	2.31267	2.84587	2.41687	2.59797	2.3283
PAK6	4.93575	5.55098	5.01733	4.57055	5.21919	5.52319	5.57455	5.50619	5.21137	5.12065	5.42943	5.82866	5.00468	5.19894	4.88568	3.53087	5.91588	5.31027	5.83901	4.83889	5.20099	5.34428	4.96772	5.36155	5.29021	5.27027	5.77401	5.48515	5.44762	6.08461	5.46287	4.7563	4.79683	5.76888	6.49032	5.45959	4.1425	5.54841	5.3283	5.69928	4.72131	4.87841
PP2672	2.79288	2.72563	3.05311	2.95714	3.47021	2.84708	2.76875	3.29938	2.94552	3.11144	3.09448	2.68027	3.48459	2.83573	2.68044	3.26942	2.78088	3.28283	2.93418	3.03509	2.87431	3.15982	3.2264	2.97265	2.78651	3.13028	2.94062	2.60743	2.9071	3.01855	2.64405	2.72548	2.95893	2.90607	3.16179	3.2981	2.80419	3.00673	2.76905	2.81551	2.90986	2.83851
ABCB9	4.4274	4.35322	4.51713	4.77646	4.95435	4.49369	3.92868	4.46665	4.4293	4.72082	4.81439	4.25606	4.85627	4.89576	4.55956	4.44675	4.47361	4.40222	4.22956	4.25634	4.53011	4.42058	4.41196	4.45645	4.17751	5.11333	4.54322	4.42934	4.04733	4.36335	4.39098	4.58915	5.32285	4.51226	4.84649	4.85468	4.7931	4.70543	5.27033	4.29603	4.82089	4.45673
TPH2	2.26659	2.17094	2.15566	2.55908	2.25576	2.28844	1.9214	2.22419	2.33334	2.27343	2.36173	2.2058	2.40223	2.20358	1.98369	2.27689	2.35658	2.33723	2.2577	2.20104	2.09121	2.27383	2.39458	2.40338	2.32554	2.52722	2.28303	2.20438	2.17762	2.39873	2.03939	2.25215	2.39118	2.02153	2.29753	2.26966	2.27884	2.17816	2.21624	2.04213	2.23158	2.15877
AQP10	3.03511	2.87639	3.18629	3.00837	3.44529	3.00789	3.11638	3.25464	3.08406	2.96865	3.09241	2.91644	3.22954	3.13586	2.79142	3.31962	3.06773	2.95313	3.35769	3.04142	2.87563	3.02968	3.29318	2.92639	2.85274	3.03538	2.95407	2.70331	3.0344	2.68259	2.91017	2.81804	3.25728	3.08514	2.96099	3.34246	2.89247	3.03973	3.09443	2.86863	3.20147	2.96361
MEGF10	5.36861	4.64204	4.89864	5.09594	5.12063	4.83215	4.72829	5.24482	4.93504	4.94474	5.12781	4.81944	5.05323	5.26634	5.00167	4.91595	4.79759	4.794	4.84751	4.90285	5.1824	5.02825	5.29211	5.17356	4.90863	5.26913	4.69035	4.67931	4.76472	4.82345	4.63141	4.95654	5.33209	4.97117	5.11169	5.01412	5.23292	4.90009	5.14787	4.47426	5.31422	4.93699
TFAP2E	4.43815	4.72085	4.94526	4.8297	4.60292	4.58676	4.74223	5.155	4.88893	4.833	4.7172	4.437	4.79673	4.7073	5.00434	4.84156	4.59761	4.72746	4.51014	4.82678	4.50605	4.53382	4.74244	4.55938	4.44014	5.0193	4.87847	4.57654	4.54828	4.35025	4.61754	4.53469	4.63012	4.43798	4.57011	4.56451	4.5232	4.63556	4.57982	4.70333	4.40943	4.36868
DDX53	2.04137	2.13794	2.03133	2.08547	2.20002	2.89963	1.99043	2.0344	2.01613	2.18753	2.24411	2.05671	2.21159	2.23721	1.93897	1.99721	2.10249	2.09118	1.96098	2.16449	1.99737	1.89638	1.97665	2.10881	2.07698	1.90243	2.08704	1.99362	1.94119	1.95133	2.08814	2.07581	2.02686	1.91934	1.87526	2.02798	2.10566	1.95521	2.072	1.82848	2.18589	1.91633
ABCB5	3.80394	3.69907	3.73594	4.38371	3.81427	3.35678	3.681	3.85942	3.79843	3.94441	3.93275	3.67709	3.88563	3.74599	3.59892	3.71691	3.9625	3.60034	3.86348	3.91605	3.28467	3.99008	4.04688	4.1203	3.58835	3.6292	3.82123	3.7268	3.76239	3.65183	3.73561	4.00827	4.18785	3.83326	3.99279	3.8573	3.56419	3.99081	4.19835	3.71024	3.95241	3.8467
OR4D2	2.86425	2.92355	2.66484	3.25552	3.65537	2.84723	2.72187	2.91693	2.8182	3.03899	3.31594	2.76288	2.9316	2.83953	3.0241	3.17521	2.62516	3.03545	2.81756	2.89638	2.83532	3.07707	3.4275	3.19676	2.64371	2.97977	3.14112	2.71105	2.83414	3.14568	2.78034	3.02582	3.21092	3.13028	3.14211	2.7628	2.84984	2.99751	3.27481	2.85055	2.91166	2.87409
ADAMTS4	3.9694	3.60307	3.9291	3.53046	3.99483	3.34214	3.4543	3.60824	3.78748	3.61138	3.75663	3.39136	3.33295	3.49025	3.29934	3.62442	3.8137	3.49579	3.54356	3.63577	3.32736	3.54625	3.94735	3.61027	3.39314	3.45485	3.38611	3.36587	3.54523	3.16107	3.46542	3.81843	3.3855	3.49822	3.46578	3.86788	3.84109	3.40131	3.44031	3.10975	3.75586	3.33446
EZHIP	2.54078	2.65043	2.20509	2.74745	3.13703	2.34024	2.32731	2.70878	2.56226	2.62918	2.38906	2.19484	2.24581	2.44581	2.52056	2.59233	2.84461	2.30772	2.43445	2.54453	2.29087	2.57545	2.50512	2.57206	2.44859	2.57001	2.33469	2.17673	2.16021	2.52459	2.35491	2.6744	2.85364	2.51591	2.62113	2.90979	2.47278	2.58928	3.08997	2.49311	2.57885	2.33359
LOC645261	2.16871	2.23046	2.3699	2.26451	2.72741	2.15322	2.54916	2.28324	2.36618	2.11767	2.34428	2.23668	2.42782	2.42134	2.2196	2.1286	2.29892	2.23912	2.08128	2.15059	1.94328	2.12004	2.45473	2.1212	2.1058	2.39855	2.21204	2.10801	2.11767	1.98453	2.03465	2.12114	2.20987	2.20987	2.16141	2.31721	2.20228	2.29807	2.20373	2.05965	2.01674	2.37538
SOHLH2	2.66838	2.73808	2.4753	2.97323	2.7713	2.57082	2.49301	2.97864	2.44702	2.77514	3.00594	2.51144	3.00254	2.66699	2.44529	2.77096	2.57308	2.82736	2.4569	3.00178	2.51311	2.92171	2.97698	2.82042	2.41423	2.8398	2.50781	2.27919	2.52333	2.69718	2.81746	2.80752	3.05293	2.79317	3.06759	2.83233	2.87321	2.94829	2.46845	2.55574	2.78325	2.96709
DUOXA1	4.55493	4.53069	4.43048	4.36767	4.57731	4.28452	4.61349	4.64738	4.55118	4.63252	4.50618	4.0791	4.41338	4.25056	4.18116	4.52303	4.52792	4.38433	4.38433	4.8502	4.43919	4.84499	4.46313	4.68075	4.39002	4.52927	5.7891	4.29683	4.41139	4.38399	4.31957	4.2457	4.21217	4.51763	4.71165	4.58515	4.41441	4.1277	5.16949	4.34051	4.80043	4.54392
FBXL21P	2.49911	2.62957	2.46009	2.78178	2.92341	2.54921	2.64071	2.74779	2.60717	2.47075	2.81294	2.66425	2.94524	2.52915	2.68902	2.69754	2.62911	2.55669	2.62055	2.76595	2.69754	2.67856	3.02298	2.42816	2.45138	2.74085	2.73451	2.65453	2.71779	2.75832	2.79893	2.84022	2.52528	2.61546	2.5258	2.74026	2.63918	2.72221	2.55574	2.64697	2.63621	2.82736
TSTD2	2.17095	2.44518	2.30074	2.55924	2.53055	2.35932	2.37066	2.40844	2.46765	2.54507	2.76687	2.51137	2.60347	2.58979	2.33405	2.64197	2.482	2.19538	2.31325	2.42426	2.67365	2.35711	2.67187	2.70292	2.32059	2.7597	2.59924	2.56519	2.51021	2.3776	2.47465	2.39031	2.82631	2.43609	2.48976	2.49602	2.34994	2.79348	2.45508	2.56419	2.62584	2.35923
CCDC172	2.57143	2.92163	2.82793	2.91223	3.02757	2.78308	2.86095	2.90558	2.95842	2.73138	3.14367	2.70353	2.92357	2.81621	2.6322	3.12675	2.99067	2.82736	3.00329	3.03453	2.79516	3.0875	3.06263	2.96187	2.61157	2.64307	2.7055	2.74431	2.68913	2.86726	2.48634	3.0106	2.87318	2.66262	3.10659	2.88787	2.70617	2.71364	2.97337	2.87974	2.9661	2.84482
TRAPPC10	4.34087	3.85198	5.09033	4.76699	3.36862	5.31964	4.785	4.59304	4.37284	4.466	4.77522	4.3452	4.58281	4.5352	4.177	4.65305	4.64398	4.77977	3.75785	3.68525	4.35261	4.1052	3.60037	4.47877	4.08336	4.88882	4.137	4.38412	4.83747	4.66687	4.3192	4.13188	5.72142	5.50724	5.3378	5.47402	3.62457	5.25781	5.93755	4.79341	5.08888	5.87414
C17orf82	5.32169	5.34428	5.70999	5.7731	6.2979	5.4017	5.42689	5.73163	5.52945	5.69946	5.47821	5.40186	5.34303	5.40538	5.49129	5.33472	5.67498	5.66214	5.26188	5.47784	5.42469	5.7913	5.81806	5.47515	5.31708	5.75807	5.71194	5.43843	5.26845	5.3769	5.24989	5.57826	5.86244	5.64148	5.47985	5.46188	5.52659	5.45453	5.76526	5.45001	5.41837	5.20483
PRR5L	6.93719	6.61715	7.24755	6.05918	6.55886	6.81808	6.81745	6.72331	7.07165	6.91738	6.91286	7.04111	7.45846	7.47589	6.41139	7.1329	7.23705	7.36854	7.2315	6.70426	7.35533	6.66971	7.00736	6.77603	6.8999	6.04558	6.80949	6.4996	6.30664	7.16623	7.42778	7.01202	5.85737	6.89187	6.72109	6.48447	6.14781	7.14372	7.35569	6.68139	7.05504	7.99214
ACTR3B	6.75355	6.30171	6.31098	5.5911	5.9687	6.03584	5.4795	6.31174	6.15143	6.28982	6.52875	6.517	6.16164	5.65537	6.66354	6.33602	5.18449	6.42195	6.94308	5.76414	6.66244	5.86827	5.83406	6.20998	5.98545	5.49345	5.65243	6.10191	5.94287	4.05895	6.30517	6.11242	6.1543	5.96947	6.08039	6.32394	6.22259	6.45629	5.21821	5.63481	6.04952	5.77089
CWC27	6.95561	6.64215	6.58627	6.53943	6.47212	7.41331	7.72982	7.67326	7.4002	6.95072	6.29374	7.11482	7.47902	5.84194	7.19161	6.72991	7.04024	6.5008	7.0105	7.34682	7.03006	7.19592	6.25174	6.84179	6.89942	6.89287	6.80804	6.43982	7.54523	7.59346	6.90698	6.86065	7.70211	6.88561	6.98848	7.55455	7.00282	7.21793	6.96406	7.5075	6.9981	7.72058
CYP4B1	3.58137	3.95478	3.89472	3.91886	4.50216	3.6427	4.03594	3.81631	3.77937	3.87678	3.96413	3.63761	3.88026	3.95404	3.79287	3.96404	3.98173	3.66452	3.83471	3.65808	3.44553	3.92937	4.07129	3.97518	3.70453	3.84154	3.85918	3.9268	3.70844	4.04769	3.55303	4.37801	4.03636	3.75649	3.91888	3.91806	3.88507	4.18507	4.29071	3.75864	3.8685	3.78024
RSRC1	5.36861	5.83617	4.88497	3.8846	5.79841	5.24305	5.51771	5.80566	6.25647	5.40581	6.24746	6.35517	5.01644	4.4568	6.30288	5.7018	6.03081	5.62658	5.50678	5.71554	5.92545	5.90265	5.4922	5.8236	5.5511	5.28867	5.56933	5.71982	5.31138	5.84294	5.81377	4.60987	5.00787	5.55699	4.86893	5.81808	4.22009	5.79469	4.70926	5.83513	5.4954	5.95041
NPSA	2.05073	2.35391	2.14131	2.14521	2.19979	2.07118	2.11063	1.97469	2.05799	1.94201	2.21923	2.25393	2.0399	2.26033	2.18455	2.32801	2.1494	1.99979	2.10809	2.14062	1.85789	2.08507	2.03422	2.19518	1.95735	2.25534	2.15702	2.14444	1.87903	2.12811	2.12811	1.86927	2.30641	1.99381	2.02959	2.13817	2.27302	1.96649	2.27302	2.15797	2.18722	2.58558
SLC25A41	3.26799	3.61865	3.81368	3.55325	3.93037	3.205	3.12668	3.51671	3.46657	3.65692	3.44426	3.22535	3.61841	3.96815	3.41199	3.43371	3.85916	3.28142	3.40321	3.18081	3.5669	3.37792	3.29411	3.44044	3.25231	3.67467	3.45948	3.18177	3.12159	3.5457	3.71537	3.23613	3.26145	3.55469	3.34957	3.68881	3.48987	3.37651	3.38351	3.56162	3.41006	3.71491
QRFPR	2.36846	2.12983	2.15634	2.58333	2.27546	2.10743	2.21836	2.34307	2.33123	2.27251	2.31443	2.3024	2.62751	2.36763	2.12189	2.34869	2.88427	2.52308	2.06813	2.45699	2.20545	2.24239	2.55574	2.42689	2.26512	2.64498	2.37445	2.50469	2.27694	3.10979	2.34869	2.22842	2.37518	2.49015	2.19949	2.54068	2.26137	2.18858	2.31446	2.27806	2.48666	2.21507
BPIFB6	2.73787	2.66932	2.51105	2.97476	2.73372	2.6026	2.35313	2.73175	2.59945	2.51665	2.78982	2.45104	3.08511	2.62961	2.5613	2.90027	2.91774	2.51709	2.5902	2.57406	2.61202	2.7936	2.62641	2.81148	2.47491	2.95475	2.80945	2.50578	2.43395	2.53592	2.46003	2.79294	3.37306	2.56777	2.93439	2.78859	2.59298	2.57633	2.6292	2.53672	2.6318	2.43536
ZACN	3.53633	3.44932	3.23124	3.34828	3.89805	3.38571	3.66479	3.70976	3.50203	3.64101	4.00907	3.33899	3.9707	3.57306	3.12577	3.37472	3.59849	3.48143	3.45917	3.53928	3.40018	3.55562	3.74841	3.67457	3.61145	3.96933	3.172	3.66073	3.80922	3.48116	3.27985	3.60393	4.28088	3.64716	3.58932	3.64798	3.76192	3.46096	3.77051	3.48452	3.65403	3.56736
BPIFA4P	3.09228	3.57654	3.37744	3.4386	3.91216	3.16247	3.16055	3.62102	3.52475	3.53722	3.52948	3.15058	3.4859	3.75639	3.08648	3.53748	3.28649	3.05293	3.61025	3.64029	3.51246	3.62115	3.51677	3.4516	3.27737	3.45078	3.12307	3.09953	3.60965	3.59233	3.13611	3.45919	3.7026	3.42043	3.67604	3.41525	3.58465	3.43592	3.59074	3.1177	3.58479	3.64612
LMOD3	2.42775	2.38577	2.69791	2.58116	2.36168	2.34419	2.52554	2.44159	2.28888	2.39356	2.37162	2.37332	2.69662	2.25845	2.24372	2.50204	2.39433	2.24273	2.55574	2.29991	2.40365	2.44011	2.55574	2.46129	2.35162	2.467	2.35049	2.43394	2.28648	2.40248	2.15978	2.42917	2.26425	2.30252	2.37404	2.46899	2.39252	2.37404	2.61223	2.12662	2.4846	2.27898
GUSBP2	2.43787	2.19389	2.45128	2.48278	2.59695	2.3467	2.25229	2.39981	2.33421	2.32397	2.48258	2.15897	2.13572	2.41111	2.43787	2.39546	2.29254	2.15921	2.35923	2.25543	2.3438	2.36533	2.33694	2.45748	2.23099	2.58102	2.31032	2.34544	2.65588	2.35772	2.23604	2.28503	2.73445	2.38229	2.6865	2.44339	2.34544	2.33469	2.58133	2.04565	2.20114	2.15116
KDELR1	10.3042	10.2461	9.56015	10.3286	10.3158	10.3798	10.1538	10.3586	10.0413	10.447	10.0913	10.0222	10.5594	10.3083	10.7047	10.0822	10.1823	10.1046	10.2423	10.4486	10.2236	10.183	9.95968	10.2576	9.97622	10.7717	10.2645	10.2514	10.431	10.3892	10.2327	10.3404	10.5274	10.4126	10.5365	10.8265	10.4446	10.5868	10.8163	10.4395	10.4358	10.7578
PTPRM	5.98803	5.99643	5.83058	5.6655	5.63333	6.68415	6.32524	5.88437	5.88024	6.09526	4.86931	7.41479	5.70496	6.05821	6.47046	5.47041	5.63622	6.28077	5.38556	7.2035	5.85717	6.41415	5.51538	6.27906	7.95702	7.92857	6.35376	5.99581	6.88571	5.27453	6.3928	6.61903	4.61133	5.79749	6.35587	6.28714	6.64259	5.68615	5.70577	7.20011	4.98766	6.04395
GATA1	4.86592	4.95064	4.84795	5.34772	5.44936	4.85202	4.7979	4.88343	4.8896	5.01603	4.96232	4.81944	4.73681	4.77709	4.83242	5.04113	4.68947	4.87113	4.47086	4.7462	4.71229	4.67876	4.97532	5.02235	4.58408	5.15637	4.8565	4.70939	4.603	4.87531	4.70861	4.94759	4.97873	4.65273	4.67577	4.86377	5.07401	4.71166	5.44546	4.49239	4.90855	4.96124
DUSP19	3.01839	3.0372	2.87227	2.97706	3.10368	3.07154	2.59849	2.74769	3.12581	2.78565	3.15389	2.83597	2.69735	2.71961	2.8851	3.01548	3.26634	2.88326	2.91877	2.88931	2.92356	3.27388	2.88133	2.96165	2.77161	2.79446	3.32697	2.81813	2.93717	2.84432	2.87314	3.01818	2.88349	2.95016	2.69718	2.94842	2.70943	2.90644	2.66211	3.15546	2.73889	2.90644
BAGE	2.67469	2.63778	2.64877	3.12191	2.7256	2.67325	2.57437	2.75045	2.73065	2.57418	2.80137	2.83776	2.94791	2.74832	2.53776	2.74502	2.70581	2.93197	3.07153	2.56373	2.68127	2.59841	3.01478	2.83219	2.74363	2.94524	2.61916	2.70279	2.73464	2.71991	2.55093	2.73014	2.86438	2.60974	2.58955	2.80979	2.71482	2.7072	2.80266	2.73724	2.73817	2.61186
G6PC	2.95518	3.50087	2.99953	3.01851	3.32939	3.04623	3.08805	2.81369	3.14902	3.31697	3.07752	2.77695	3.03741	2.75107	3.01652	3.09079	3.27671	3.08264	3.25866	3.11576	2.59798	3.41412	3.17627	3.01843	3.06097	3.24303	2.89184	3.0477	2.93092	2.93811	3.11143	2.89977	3.32857	3.05356	2.99457	3.51422	3.10097	3.19597	3.36831	2.75875	3.04623	2.91733
SUGT1P1	3.13203	3.11772	3.19535	3.17851	3.36877	3.11917	3.38981	3.30749	3.18389	3.22198	3.59279	3.17564	3.05268	3.36497	3.29984	3.37806	3.48481	3.26913	3.53703	3.33864	3.20303	3.71994	3.40883	3.32009	3.29577	3.32605	3.25128	3.29556	3.31956	3.25875	3.07656	3.26551	3.18776	3.39428	3.16289	3.33393	3.19871	3.26896	3.27182	3.35828	3.32422	3.09883
PTGIR	5.43208	5.45337	5.73728	5.54611	5.96852	5.16147	5.67074	5.66671	5.37933	5.76424	5.8205	5.36941	5.76215	5.60331	5.41769	5.73659	5.62648	5.57216	5.65157	5.59149	5.34317	5.93938	5.62652	5.55709	5.59904	5.32794	5.46126	5.6189	5.39494	5.28848	5.33979	5.71461	5.88901	5.48403	5.79398	5.50009	5.92733	5.39247	5.72384	5.49345	5.57205	5.27881
KLHL17	4.37202	4.54649	4.65543	4.58731	4.72344	4.41865	4.53047	4.79436	4.81944	4.5857	4.65584	4.25975	4.50765	4.44422	4.26895	4.4143	4.66212	4.42644	4.66929	4.1986	4.48585	4.50575	4.65304	4.54301	4.40025	4.63899	4.133	4.35377	4.59825	4.46351	4.31332	4.52414	4.76401	4.32281	4.53579	4.44184	4.76998	4.3578	4.34717	4.62892	4.50598	4.4523
OR10A5	2.84138	2.86672	2.71551	2.93402	3.314	2.47735	2.70327	2.70443	2.44934	2.81948	3.05767	2.47805	3.02455	2.7226	2.61466	2.80523	3.079	2.6525	2.39706	2.84985	2.36075	2.85147	3.00787	2.59844	2.56401	2.91551	2.6494	2.88988	3.04424	2.70279	2.31195	2.76834	2.63848	3.00219	2.77025	3.00187	2.83803	2.52469	2.95275	2.5074	2.76685	2.77208
OR10A4	3.36479	2.9808	3.55633	3.32889	3.55207	3.04509	3.31052	3.62993	3.39184	3.32486	3.69137	3.38499	3.26048	3.21545	3.87367	3.46662	3.50247	3.09969	3.2775	3.31012	3.19491	3.24588	3.60562	3.4228	3.11946	3.13111	3.29395	3.46494	3.20227	3.41895	3.19801	3.61742	3.80331	3.21575	3.36704	3.65445	3.13964	2.91319	3.73992	3.12706	3.45919	3.04209
CD300LG	6.23373	6.34248	6.48918	6.04697	6.68039	6.19878	6.31606	6.2566	6.48902	6.35901	6.65164	6.11681	6.47899	6.36044	6.29482	6.59824	6.57885	6.35533	6.26714	6.24303	6.11447	6.47664	6.3272	6.27614	5.69056	6.26115	6.3275	6.21199	6.095	6.11793	6.0579	6.25558	6.54996	6.22545	6.05104	6.37129	6.30773	6.45394	6.14291	6.06658	6.34029	6.11909
TREML1	3.87686	3.4436	4.04949	3.8001	4.56887	3.63098	4.12852	3.91176	3.86135	4.04326	4.46207	3.64894	3.92275	4.19027	3.26388	4.22777	3.95598	3.6497	3.61025	3.58039	3.59412	3.69468	4.51042	3.64195	3.57152	4.03849	3.48317	3.5351	3.6487	3.72917	3.54906	3.59187	3.77758	3.64005	3.56674	3.57642	4.2601	4.02618	4.04136	3.73527	3.98886	3.70733
OR8D1	2.81403	3.25925	3.23156	3.31758	3.33499	2.84545	2.96599	3.01931	3.06385	3.01088	3.33983	2.86588	2.8624	2.92604	2.9748	2.85507	3.29069	3.03186	2.95324	2.73328	2.99417	3.28817	3.33559	3.11733	2.83544	3.19	3.00112	2.65002	2.84957	2.82905	2.67054	3.05541	3.37656	2.69794	3.24774	3.07742	2.89622	2.94829	3.32079	2.74224	3.04207	2.8876
DAOA	2.74865	2.49336	3.00294	3.0492	2.81018	2.86822	2.89219	2.54599	2.7411	2.88945	2.76502	2.74709	2.67489	2.57118	2.83438	2.94619	3.00901	2.56845	2.5687	2.56011	2.7117	2.79942	2.58613	2.77055	2.53716	2.53315	2.79716	2.74459	2.60566	2.6048	2.74784	2.75316	3.09394	2.559	2.38866	2.41113	2.88025	2.73884	2.82492	2.86914	2.57827	2.84198
BLID	2.09443	1.9796	2.14982	2.58966	2.44924	2.14352	2.23553	2.36533	2.30278	2.25044	2.27451	2.28141	2.30708	2.20761	2.41872	2.30037	2.4774	2.33894	2.12257	2.47328	2.2042	2.12486	2.30547	2.16932	2.33321	2.32843	2.21148	2.31621	2.30493	1.994	2.21043	2.31792	2.28401	2.21439	2.39423	2.41977	2.20203	2.50057	2.13432	2.21293	2.34595	2.50539
CLRN1	4.09895	4.30795	4.28933	4.1811	4.19919	4.08621	4.05884	4.13664	4.28979	4.23394	4.53365	4.09503	3.98275	4.15121	4.24145	4.34	4.32399	3.89887	4.18886	4.23702	3.77388	4.44872	4.5129	4.2914	4.05352	4.19167	4.02807	4.16632	3.98934	3.98227	3.82462	4.31567	4.29981	4.13293	4.20066	4.21465	4.17169	3.90067	4.29822	3.93201	4.11596	3.83204
KLK4	5.35302	5.57041	5.74131	5.67558	6.09198	5.24471	5.51453	5.57739	5.66127	5.73446	5.92952	5.46401	5.44908	5.47416	5.60967	5.83631	5.74145	5.4395	5.61706	5.75706	5.4416	5.99444	5.78022	5.52941	5.4268	5.79044	5.66702	5.17587	5.39212	5.41081	5.49468	5.79753	5.94029	5.59537	5.87912	6.0334	5.71631	5.70833	5.70446	5.37406	5.80292	5.74105
ERVH-6	7.17665	7.06671	7.26387	7.09177	7.62582	7.08519	7.4456	7.39228	6.97461	7.23847	7.93357	6.981	7.35347	7.19687	6.9875	7.54712	7.25339	7.1665	7.33347	7.22034	7.19172	7.4183	7.91834	7.30483	7.05394	7.57241	7.42489	7.21827	7.25408	7.24362	7.01327	7.15028	7.42431	7.38287	7.23259	7.34085	7.1752	7.12357	7.46579	7.03558	7.24473	7.11997
GEMIN7	6.78031	7.26073	6.87264	6.28529	7.30325	7.06757	6.75973	7.03154	7.64618	6.3723	7.15686	7.31278	6.49244	6.7032	7.16988	7.46485	7.30321	7.1815	7.05377	6.878	7.05074	6.51912	6.48845	7.06365	5.79977	5.78134	7.01883	6.69331	6.7532	6.62787	7.10718	6.67909	6.25727	6.77108	6.91598	6.66784	6.98967	6.57545	6.29457	7.29943	6.573	6.87107
STH	3.95755	4.02207	4.49621	3.8722	4.88185	3.94893	4.00146	4.19521	4.50532	3.99391	4.14961	3.82789	3.91225	4.39273	4.09327	4.40735	3.79039	3.97075	4.11517	4.02402	3.93441	4.46714	4.1641	3.88046	3.75843	4.06363	3.97813	3.94913	3.67136	3.76543	3.76807	3.91371	4.08438	3.86052	4.08869	4.22301	4.22912	3.87714	4.06674	3.67414	3.95183	3.83519
LLCFC1	2.89678	3.03375	2.80183	2.74107	3.21317	2.71098	2.81931	2.9591	2.91599	3.167	3.25081	2.86025	2.95742	3.16122	2.89426	3.24578	3.02419	2.89843	2.82558	2.81213	2.69948	3.07517	2.98929	2.89737	2.75489	2.84483	2.99384	2.78655	2.89599	2.96753	2.90182	3.11264	3.20951	2.83814	3.13062	3.05314	2.93773	2.84977	2.82868	2.96406	2.84483	2.75802
CCL5	7.9637	6.05545	7.97542	6.6905	7.39131	5.57002	7.03629	6.70076	7.05552	7.74615	5.68481	6.99784	7.32935	6.59757	5.16891	6.1559	7.00835	6.44687	5.06126	6.44691	5.38961	7.96611	5.9135	7.42266	6.26052	7.57544	5.89492	7.48746	8.11854	7.73967	5.52125	7.25505	6.73903	7.46804	6.77132	5.63818	7.03661	6.14979	5.71224	7.84971	5.88984	5.07608
TIMM10	9.17066	10.2349	9.39688	7.89698	8.83045	8.52614	9.64291	8.49398	9.57481	8.94051	9.26991	9.62614	9.14673	9.29691	9.0233	8.80072	8.68163	9.45012	9.10197	8.1811	8.67746	8.59275	8.89425	8.72664	7.92691	7.93136	8.48979	9.24534	8.99401	7.95676	8.70044	8.65303	8.08115	8.87794	8.59468	8.21944	8.33053	8.73012	8.29124	9.02195	8.17599	7.76384
BPIFC	3.15222	3.32888	3.77429	3.17065	3.561	3.08831	3.25738	3.25862	3.27386	3.26722	3.53144	2.95108	3.32712	3.08552	3.12	3.47552	3.42135	3.13278	3.20493	3.09048	3.24125	3.33051	3.73033	3.26761	3.11861	3.16386	3.20197	2.95089	3.12	3.32712	2.90443	3.31161	3.02396	3.15373	3.22098	3.34229	3.52184	3.18037	3.32006	3.02968	3.26159	3.19854
ZAR1	2.90714	3.07711	2.92491	2.76189	3.19225	2.75667	2.97168	3.02218	2.80367	3.12338	3.20218	2.88128	2.96324	3.14811	3.01894	3.29884	3.12414	2.78159	3.04168	2.89543	2.72563	2.94829	3.1398	3.04471	2.82738	3.059	3.06311	3.04856	2.84632	2.83805	2.65228	2.89125	3.25047	2.84884	2.91588	2.93335	2.88494	2.94829	3.33417	2.87823	3.08506	3.04017
SLC66A1	5.13127	4.97135	5.02188	4.86637	5.45579	5.34382	4.89972	5.32392	5.06834	5.0809	5.15609	5.02339	5.41551	4.83905	5.06455	5.23126	5.30127	5.08631	5.51669	5.306	5.05003	5.39755	5.30865	4.95826	5.49608	5.15314	5.24347	5.08225	4.64814	5.51387	5.196	5.10641	5.19166	5.57028	5.27346	5.43467	4.70469	5.23749	5.49345	5.46344	4.84935	5.38553
LINC00520	6.9613	7.19286	6.66295	7.21213	7.88326	6.90487	6.9624	7.59736	6.9214	7.22445	7.16695	6.65806	7.23694	6.86811	6.98554	9.02292	8.10915	7.03943	6.43805	7.03106	6.87663	7.50094	8.00261	7.51312	7.05642	7.5769	9.38259	6.86649	7.41075	7.02975	6.91373	7.25016	7.59206	6.94343	7.68509	7.22972	7.0091	7.05672	7.83115	6.71237	7.54946	7.82199
JHY	3.14219	3.60745	3.31197	3.65077	3.21174	2.87846	3.20439	3.17652	2.98815	2.89877	3.30826	2.82245	2.90209	2.99954	3.18277	3.13069	3.4774	3.10474	2.91733	2.96184	2.93441	3.10877	3.46614	3.24785	2.7745	3.2596	3.06311	3.20998	3.17985	2.84433	3.19636	3.30769	3.36482	2.96126	3.37035	3.12343	2.93068	3.44059	3.13587	2.56769	3.2856	3.00502
CCDC116	3.87051	3.81647	3.98586	4.08399	4.31618	3.70916	3.88001	3.78981	3.72818	3.8376	4.36355	3.62111	4.08492	3.99734	3.43134	3.93912	3.89748	3.8106	3.97264	3.78509	3.58824	3.77521	4.13362	3.86776	3.51246	3.74739	3.97428	3.71862	3.80303	3.79688	3.54636	3.74814	4.00465	3.71022	3.82703	3.77665	4.02648	3.6628	3.94889	3.56824	3.95654	3.68568
MKS1	4.92912	4.78731	5.27735	5.28164	5.21338	5.07909	4.83092	5.27714	4.93833	4.82191	5.08759	4.89342	5.27497	4.64801	5.00671	5.04517	5.31955	4.74756	4.84483	5.01176	5.11296	4.94662	4.88135	4.95084	4.67129	4.78478	5.06083	4.83073	4.89172	5.13592	5.44588	5.03763	5.04329	5.14734	5.33536	4.94973	4.94175	5.30189	5.0168	4.97603	5.05155	5.14398
PACS2	7.71249	7.70124	7.66016	8.07458	8.2425	7.81328	7.64395	7.92295	7.89438	7.74469	8.23328	7.55409	7.72291	7.74945	8.10804	8.32666	8.02479	7.70357	8.19179	8.22641	7.94816	8.44088	7.99153	7.98118	7.88743	7.96852	7.9302	7.68308	7.9258	7.66006	7.70409	8.30955	8.40254	7.90407	8.03713	7.92862	7.98805	7.8228	8.04619	7.98063	7.49644	7.54824
KLF6	8.48941	9.15433	8.75015	8.16239	9.11763	8.6018	8.37466	8.09183	8.86331	8.73484	8.69946	8.83681	8.78791	8.92529	8.73656	9.08457	9.10143	8.43832	9.17489	8.48105	8.086	9.12063	8.15996	8.92623	9.94383	8.82158	9.02147	8.7191	8.62498	9.08683	8.44663	8.6767	8.56088	8.46481	8.40828	8.47299	7.89275	8.47911	9.26516	8.47415	8.39745	8.6419
C3orf79	2.01916	2.21715	2.1533	2.11326	2.22521	1.96323	2.18188	2.15097	2.13434	2.09273	2.14512	2.18983	2.30174	1.90988	1.97259	1.92211	2.10693	2.24545	2.16395	2.01031	2.12107	2.15647	2.09009	2.05613	2.13921	2.21383	1.93545	2.37964	2.11331	1.94287	2.0208	2.19384	2.05814	2.39376	1.94154	2.12083	2.14246	1.98735	1.92105	2.11205	2.19951	1.93388
MSANTD3	6.87779	7.52471	7.10544	6.2883	7.14368	6.69319	6.92271	6.67485	7.19625	6.77627	6.75305	6.53248	6.67287	6.5405	7.30315	6.85829	6.3094	6.52276	7.09519	7.10134	6.57491	7.01708	6.1239	6.9457	7.38296	6.71709	7.40965	6.44555	6.55375	6.1645	6.82648	6.87649	5.9452	6.84112	6.32988	6.46357	7.03252	6.42789	6.07379	7.33283	5.84927	6.41094
HNRNPM	9.69599	9.1696	9.34171	9.37271	8.87053	9.62244	9.61792	9.80709	9.15785	9.57769	9.19096	9.64828	9.62894	8.57574	9.90233	8.82482	9.32236	9.28198	9.29719	9.82021	9.61594	9.74996	8.88913	9.55284	9.62377	9.49252	9.24663	9.64628	9.95201	9.71412	9.76318	9.39179	9.68521	10.0058	9.73428	9.65548	9.38063	9.90589	8.73725	9.68066	9.23118	9.72618
SELENOW	10.204	11.3397	9.33237	10.4643	10.875	10.4364	10.8313	10.6224	11.4326	11.0851	10.2511	10.7134	10.6911	10.4947	10.8753	11.3555	10.7416	10.6048	10.3746	10.2318	10.8439	10.5656	9.85532	10.6238	10.3638	10.7381	10.8134	10.6093	10.3398	10.8819	10.1572	11.3423	10.619	10.6843	10.6147	10.0939	10.4547	10.2986	10.8428	10.7531	11.0448	11.2336
PSMB8-AS1	6.88966	7.07812	7.47004	5.81027	6.73467	5.52451	6.24832	6.68123	7.24486	7.60039	6.67379	7.30363	5.80427	5.91745	6.56111	6.52587	6.27156	6.49074	5.31118	6.85433	6.01441	6.40138	6.33048	7.08178	6.14779	7.28078	6.47066	7.53321	6.95553	6.53981	5.87616	5.9948	6.41829	6.95821	6.39745	5.08158	6.59564	6.54816	5.44537	6.69847	5.72229	6.50913
TOLLIP-AS1	3.31476	3.51103	3.3805	3.26693	3.78789	2.786	3.23553	3.11395	3.43583	3.03278	3.19462	2.96176	3.2593	3.05769	3.30677	3.03244	3.16495	2.94408	3.74653	3.31289	3.09826	3.48726	3.62666	3.1309	3.16722	3.29271	3.10458	3.07638	3.04482	3.11258	3.22033	3.22175	2.53961	2.93416	2.86535	3.1538	3.29914	3.36425	3.50188	2.9875	3.29095	3.16442
HEXD	6.83608	5.8553	7.03187	6.82137	6.55437	6.44023	6.5858	6.70945	5.7057	7.04364	6.50871	6.14598	7.00117	6.56139	6.04454	6.76231	6.41672	6.36621	6.38472	6.2625	6.21704	6.66805	6.53979	6.24711	6.21499	7.14694	6.60824	6.61335	6.50253	6.96316	6.39775	6.31493	6.74756	6.83307	6.49288	6.57469	6.57617	6.44296	6.63296	6.69612	6.58516	6.3904
LOC100507477	3.40919	3.52105	3.90238	3.37	3.21209	3.30639	3.06473	3.48252	2.91494	3.54268	3.51135	3.36507	4.55544	4.60562	3.34103	3.7594	3.64721	3.61806	3.6072	2.99939	3.62297	3.29835	4.19438	3.70207	3.44391	4.41362	3.06311	3.47672	3.77432	3.61883	3.29442	3.52793	3.61687	3.37526	3.4439	3.44271	3.9034	3.30639	3.77051	3.2616	3.85917	3.50288
ERVFRD-1	2.32742	2.75564	2.67196	2.94717	2.77637	2.68202	2.63876	2.7591	2.77789	2.76217	2.64919	2.75215	2.853	3.10694	2.916	2.79	2.85641	2.56867	2.76217	2.61449	2.63002	2.623	2.81947	2.94456	2.7516	2.74779	2.44391	2.38732	2.70627	2.59259	2.77637	2.7745	2.52059	2.71197	3.19435	2.76615	2.66411	2.801	3.34982	2.67211	2.87239	2.89801
SPIN3	5.30533	5.7719	5.7305	5.38299	4.09025	5.63365	4.11097	4.47706	4.37883	4.79147	3.97242	4.6387	4.92933	4.34646	5.25969	4.05255	3.95026	4.21477	4.40192	4.59066	5.62658	3.86746	4.85288	4.99415	4.26131	4.26328	4.12313	4.87446	3.54009	3.84586	5.02184	5.115	5.16267	4.99021	4.81096	5.89664	4.84719	5.41922	4.64521	4.49935	4.9064	4.15602
UBR5-AS1	4.64598	4.97839	5.21156	4.04284	4.18257	4.2694	3.69736	5.21824	4.37039	4.34911	4.00473	4.4859	4.23193	3.81646	4.58303	5.02631	4.38602	5.63276	5.75363	4.21951	4.68127	4.07651	4.71341	4.62606	5.05534	3.88526	4.59231	4.45937	6.6177	4.20432	5.23533	4.52109	4.19177	4.14403	4.08496	3.29392	3.5768	4.77151	3.28208	3.97945	4.44858	2.94361
CRTAP	9.91785	9.81854	9.41948	9.61039	8.91374	9.4497	10.1126	9.1594	9.72107	9.64831	9.62805	10.0525	9.92508	9.88763	9.96005	10.0166	9.29699	9.94748	9.61334	10.2174	9.90117	9.71157	10.3818	10.0503	10.0781	10.2548	9.42289	9.50625	9.71601	8.51576	9.42779	9.86852	8.82844	9.36575	9.02983	9.12428	9.97	9.31023	9.40021	9.56275	9.4487	8.86579
MTSS2	4.08098	3.91498	3.38444	3.69098	3.80759	3.96973	3.9021	4.1151	3.67514	4.148	4.19804	4.04809	4.25836	3.86833	3.80942	4.12848	3.94153	4.05179	3.94087	3.93726	3.44451	4.19581	3.85293	3.86976	4.66249	5.0778	3.96292	3.38573	3.4347	4.17098	3.59703	4.07127	4.48909	4.4535	4.86175	5.39622	3.69494	3.99949	4.58105	4.24807	4.72254	4.61604
ADAM15	6.83215	6.93156	6.49596	6.71884	7.47148	6.72728	6.95774	7.46974	7.05087	6.90957	7.22321	7.21997	6.67816	6.80753	7.1286	7.45371	6.73834	7.26514	7.26825	7.20499	6.8036	7.44848	7.64122	7.30623	7.00624	7.44169	7.26204	7.01524	7.3532	6.97662	6.99575	7.10118	6.90373	6.59131	7.0695	6.76397	7.29404	6.85838	7.56458	7.4416	6.92116	6.93338
ANKRD36C	2.53024	2.05555	2.15256	2.51049	2.37404	2.55739	2.16014	2.20283	2.26966	2.35737	2.084	2.17334	2.62119	2.41367	2.31563	2.29192	2.50586	2.34057	2.32712	2.08209	2.12546	2.29129	2.20873	2.30522	2.04923	2.4545	2.31018	2.25196	2.25685	2.08339	2.14389	2.13155	2.10341	2.38229	2.24423	2.38907	2.22318	2.07792	2.34359	2.34644	2.29129	2.21943
TCAIM	7.12539	7.29194	6.85383	6.88105	7.42783	6.76682	7.81533	7.03131	7.51671	7.54385	8.11693	6.66254	7.23319	6.82188	7.68329	7.52943	6.86423	7.56174	7.34224	7.00504	8.03617	7.09451	8.25936	7.27463	7.01377	7.11958	6.44606	7.08195	7.07806	6.05936	7.39422	7.12273	6.84022	7.12456	6.73033	6.0232	6.80857	7.04626	5.8927	7.42995	8.08698	6.85915
AGAP2-AS1	4.9316	5.2081	4.99365	4.14037	4.96655	5.76297	5.97114	5.6091	5.13943	5.48134	6.38186	5.74519	4.76071	4.53004	5.904	5.61182	5.18052	4.92374	5.61623	6.0713	5.21933	5.85614	4.9816	5.72521	6.18005	6.16601	5.78856	5.0809	5.2094	5.44668	5.17271	5.78115	4.60893	5.43352	4.90997	5.12557	5.04126	5.33908	5.34128	6.6122	4.05659	5.44999
PTCD2	5.28737	6.22294	5.62799	4.91642	5.2082	5.54679	5.66753	6.05695	6.2169	5.38891	5.82538	6.09274	5.23421	4.66774	6.08659	6.21122	6.25756	5.53967	6.00041	6.11124	5.87014	6.14582	5.65481	6.08659	6.0039	5.95399	5.47231	5.15615	6.65829	5.48028	5.63824	5.78354	5.65435	5.03218	5.13136	5.00825	4.88245	5.81955	4.60282	6.25855	4.73639	6.31727
ST7-AS1	3.08409	2.87061	3.12931	2.96764	3.09159	3.23499	2.81596	2.72508	2.9707	3.17749	3.77243	3.03524	2.96144	2.88551	3.2452	3.06043	2.81783	3.08969	3.37787	3.19424	3.0619	2.97552	3.14264	2.97499	3.19061	3.3683	3.31543	3.01436	2.92211	3.17356	2.86144	3.10223	3.08888	3.09984	2.81147	2.79119	3.58224	3.16561	2.91984	3.21221	3.1049	2.99403
MIR1915HG	5.94242	6.03968	6.37212	5.98866	6.79159	5.57454	5.95285	6.09398	5.88906	5.92887	6.38851	5.80657	6.17924	6.36323	6.0982	6.36471	6.11798	5.92791	6.05022	5.70268	5.75455	6.08057	6.47771	5.96785	5.85318	6.26405	6.02249	5.89535	5.96956	5.87152	5.55594	5.83517	6.26735	5.84446	6.02159	6.16676	6.19007	5.88572	6.07323	5.84954	6.13194	6.12631
TSGA10	3.23526	3.25302	3.73594	3.41727	2.99506	3.39082	3.05281	3.10563	3.29432	3.18065	3.2984	3.03819	3.31258	3.18302	3.07506	3.20483	3.0335	2.67862	3.21398	3.41051	3.16273	3.24909	3.55945	3.05223	3.0554	3.34105	3.33098	3.22006	3.03852	3.19653	2.9813	3.47884	3.2485	3.10241	3.24763	2.96249	3.12067	3.08199	3.05458	2.96874	3.20035	3.09563
HUNK	6.46104	7.07843	7.21233	7.69358	5.41949	4.83032	8.57561	8.65228	6.34014	7.10505	5.21286	5.33866	6.45159	6.24361	4.35393	4.95461	5.97848	6.32778	6.70929	6.0955	7.53582	7.22356	7.47466	5.52275	4.95929	4.61621	4.98568	6.81397	6.40382	6.11187	6.88108	7.39807	8.67222	6.68138	5.39166	6.67862	6.04338	7.31738	7.3885	4.68238	7.85743	6.34254
PRKCA-AS1	2.35937	2.42028	2.46513	2.60523	2.56522	2.25319	2.26088	2.48485	2.34162	2.58103	2.29575	2.38802	2.3832	2.37404	2.40436	2.49538	2.82739	2.3262	2.30702	2.44434	2.42341	2.5536	2.67229	2.39115	2.34469	2.50295	2.74771	2.37861	2.43236	2.63205	2.23427	2.74392	2.28717	2.17161	2.47734	2.39869	2.40943	2.26671	2.53906	2.3002	2.3832	2.44184
PGAM5	5.18291	5.13523	4.77835	3.99594	4.78169	4.86314	4.80281	5.12667	4.88172	4.84629	4.7196	5.07491	4.73824	4.2957	6.06709	5.89702	5.40106	5.03569	5.0538	5.01228	4.73676	5.22757	5.28937	4.723	4.63168	4.19874	4.09687	4.69467	5.25446	4.44573	4.84858	4.9663	4.18113	5.00889	4.76388	4.70201	4.55115	4.47446	4.74335	5.08332	4.79991	5.11085
CD55	8.16404	8.68857	8.25498	7.22384	10.0076	7.86403	7.82169	9.16636	8.88548	9.43384	9.21777	7.92549	8.18826	9.24515	9.21521	9.6418	9.64521	9.44722	8.85719	8.52336	8.17077	9.31342	9.67318	10.2578	9.39104	10.0097	11.0731	9.22146	9.03153	9.97288	9.29891	10.0971	7.63906	7.46636	9.99225	7.11333	8.55773	8.24853	9.18846	9.9269	8.65629	9.64113
HINT1	11.0746	11.4922	11.7361	10.7722	11.9377	11.6309	10.791	11.1788	12.0225	11.3708	11.9482	11.0965	11.3956	11.3123	11.1351	11.4841	11.5688	11.2401	11.3193	11.3334	11.3378	11.3725	10.7316	11.2739	10.587	10.6828	11.8215	11.6963	11.3499	11.2718	10.7425	11.4877	11.3941	11.2822	10.5775	11.4377	11.3342	10.7743	10.8392	11.6987	11.1604	11.3034
B3GNT7	7.15594	4.96225	4.90353	6.26389	8.11468	4.12533	4.43564	6.22215	6.577	5.76463	4.53951	4.00346	5.32145	4.41651	6.13953	4.87783	6.68845	6.79854	4.13121	4.62074	4.34735	5.43126	4.16636	7.21908	6.16482	4.4652	7.24676	5.26107	3.74462	4.50187	4.47361	4.3916	4.16364	6.85124	4.47777	4.53575	4.63872	4.99438	6.29399	4.30333	4.66602	4.19468
LINC02593	3.95755	4.26551	3.73594	3.7715	4.41822	3.92431	3.99546	3.65905	3.71957	4.12773	4.29183	4.34749	4.12267	4.16437	3.84513	3.99252	3.8912	4.14293	4.274	4.20235	3.99327	4.0255	4.38525	4.26744	4.12576	4.335	3.87349	3.56659	3.59885	3.97627	3.82444	4.01757	3.96847	4.20392	4.03511	3.85404	4.07258	3.70948	4.36749	3.83035	4.10489	3.96847
ASB16-AS1	3.257	3.28634	3.50658	3.34434	3.23974	3.24011	3.03005	3.54737	3.05641	3.15796	3.03942	2.99574	3.03005	2.6934	3.2926	3.22733	3.31379	2.73395	3.42283	3.20721	3.31907	2.93911	2.96799	3.13288	3.12733	3.35598	3.41428	3.22135	3.29964	3.17068	3.3091	2.97868	2.91528	3.26761	3.24774	2.83183	3.25309	3.06622	2.98657	2.81687	3.07075	3.43997
C17orf64	2.8365	2.56072	2.83372	2.99637	2.98676	2.24469	2.84673	2.9175	3.36213	2.86448	2.55983	2.7735	2.94228	2.88333	2.66004	2.6936	2.93021	2.83969	2.74402	2.43684	2.71834	2.73738	3.20493	2.94729	2.37426	2.65504	2.69692	2.73021	2.55511	2.67303	2.53711	2.63025	2.8851	2.85724	2.93333	2.47512	2.78666	2.53554	3.05255	2.71429	2.79988	2.89816
C22orf42	2.95013	3.3504	2.71996	2.94542	3.31689	2.81927	2.69637	3.49739	3.02051	2.55411	3.20218	3.05293	3.30807	3.04604	2.9072	3.40901	3.241	3.13159	3.00871	2.84461	2.89081	3.00487	3.78703	2.86942	2.62032	3.0658	2.96679	2.84682	2.79518	2.57243	2.65401	2.93284	2.95647	2.79042	2.94434	2.82528	2.74338	2.7936	2.96781	2.8028	3.15751	2.8595
DIAPH3-AS1	3.42049	3.60327	3.32813	3.64196	3.80013	3.40902	3.49182	3.48795	3.46407	3.53261	3.61376	3.4785	3.70483	4.01677	3.27921	3.13196	3.64502	3.42213	3.12006	3.1458	3.70084	3.24438	3.75303	3.40399	3.43287	3.52096	3.48855	3.72791	3.44926	3.83727	3.33216	3.21339	3.43381	3.42192	3.28391	3.32938	3.46173	3.05397	3.78188	3.474	3.57626	3.48671
LOC101928817	3.05341	2.76522	2.90455	3.2547	2.85655	2.9368	2.49183	2.86846	2.96502	3.25139	3.09935	2.88448	2.98501	2.89316	2.68042	2.95719	2.83174	3.11781	2.85811	2.76253	2.97732	3.00785	3.06196	3.02187	2.85854	3.0241	2.94491	3.09506	2.75675	2.85277	2.77	2.9403	3.03119	3.31582	3.02538	3.30054	3.10207	3.00785	3.32199	2.59671	2.98501	3.6172
KLHDC7A	3.17536	3.23543	2.93641	2.93637	3.73008	3.26761	3.33471	3.63888	3.2261	3.37075	2.94033	3.12084	3.45076	3.25926	3.18994	3.14432	3.29941	3.22109	3.20493	3.56718	3.20844	3.10734	3.20493	3.31969	3.06338	3.45505	3.43459	3.05865	3.01	3.5429	3.04412	2.9039	3.12958	3.25759	3.80285	3.22631	3.4904	3.14179	3.63729	3.10451	3.16041	3.56064
MESP2	4.68662	4.67348	4.67644	5.12255	5.18012	4.6236	4.4255	4.62371	4.69387	4.98327	5.08822	4.62087	4.45236	4.96446	4.6682	5.09751	5.11411	4.69516	4.63526	4.86569	4.35289	5.20044	4.87958	4.87352	4.58663	4.62198	5.11683	4.56849	4.73064	4.83981	4.8899	4.90627	4.94527	4.56525	5.13836	5.05765	4.67332	4.74755	4.74318	5.1198	4.92342	4.61298
EME2	5.24106	5.25626	5.32674	5.2747	5.70875	5.10509	5.17932	5.08977	5.13362	5.81235	5.35141	5.33446	5.6356	5.38096	4.94748	5.50424	5.56685	5.01809	5.33559	5.48109	5.11534	5.58236	5.375	5.16222	5.4678	5.62699	5.49911	5.04448	5.22543	5.20967	4.93954	5.50122	5.65497	5.29941	5.48252	5.52663	5.47285	5.08675	6.15598	5.17194	5.5182	5.26359
LINC00893	2.07608	1.96736	2.14485	1.89019	2.12606	2.15565	1.96864	2.02669	1.97663	2.0836	2.1733	2.06029	2.2904	2.36161	1.93595	2.06414	2.18686	1.98302	2.2491	1.87157	2.04427	2.02993	2.26484	1.99603	2.02014	2.03232	2.14791	2.21909	1.98373	2.08775	2.32741	2.06598	2.9667	2.02619	2.06029	2.20602	2.30396	2.53005	2.39313	1.98645	2.29999	1.84333
LINC01138	5.3125	5.97522	5.81577	5.62811	5.68825	5.89595	5.53322	4.61278	5.6524	5.48767	4.87863	5.42617	5.64079	5.60844	5.49877	4.66567	4.75114	4.72007	5.98521	5.65753	5.45576	5.11393	5.20973	5.05751	5.95275	5.56399	5.35102	5.67107	5.0657	5.08374	5.03642	5.34631	5.44593	5.26601	5.50933	6.15095	5.99746	4.963	5.53843	5.16341	5.21032	5.02851
LINC01089	5.93945	6.05232	6.21941	6.17316	6.57113	6.26892	5.98045	6.05706	5.94608	6.45107	6.24302	5.80589	6.79064	6.043	5.96895	5.89595	6.07607	6.00181	5.86122	6.00022	6.12843	6.24477	6.21259	6.40664	6.0288	6.69585	5.96834	6.02945	5.96895	6.59641	5.93012	6.30333	6.78509	6.25963	6.34647	6.59173	5.92362	6.28684	6.74923	6.09883	6.51368	6.1456
LOC100507564	3.0716	3.52105	2.70759	3.47423	2.90764	2.5842	2.9104	3.14076	2.65761	3.20096	3.29966	2.58134	3.13413	2.99643	2.86869	3.38207	2.60128	3.02833	3.20109	2.72883	2.85557	3.07755	2.71173	3.52187	3.09807	3.27923	3.69646	3.01987	3.33185	3.31268	2.90523	3.17552	3.56508	2.93206	2.97213	3.00201	3.02123	3.19271	3.09962	3.02123	2.88398	2.64609
NEUROD1	2.60817	3.24613	2.95292	2.75654	2.93419	2.84502	2.60847	2.97519	2.73065	2.87731	2.62313	2.92236	2.94934	2.61974	2.41238	2.95682	2.84461	2.54361	2.73217	2.55331	2.67029	2.68422	3.16287	2.85442	2.45657	2.35549	2.73065	2.6535	2.59079	2.5557	2.61069	2.49472	2.72124	2.9723	2.82783	3.47937	2.51089	2.80343	2.63368	2.72574	2.91255	2.56976
ZNF451	7.69139	7.8879	8.41363	9.16133	6.90898	7.87985	8.20505	7.37755	7.62217	7.82046	6.82222	8.26253	8.0556	8.01159	8.05966	8.01857	7.4511	7.7339	7.34471	7.74373	7.64041	7.56605	7.88042	7.19687	7.75575	8.22675	7.72878	7.85928	8.43345	7.60788	7.94123	7.81768	8.68734	8.98396	9.05508	8.28834	7.88483	8.34994	8.40705	7.74458	8.29572	8.298
LINC00528	2.61027	2.72151	2.65019	3.3053	3.09424	2.3976	2.48617	2.52833	2.58316	2.71152	2.53849	2.49413	2.57884	2.63753	2.48243	2.84734	2.85713	2.61991	2.61023	2.55298	2.74354	2.5182	2.78265	2.64856	2.6029	2.4117	2.4202	2.55429	2.40616	2.61621	2.15637	2.66351	2.53533	2.35093	2.41777	2.6077	2.69319	2.51303	2.82599	2.47227	2.55868	2.51072
LINC00290	2.13725	2.25106	2.10946	2.13529	2.22099	2.08313	2.07783	1.9537	2.26051	2.20735	2.14238	2.05523	2.19584	1.96132	2.05967	2.26149	2.00581	1.9064	2.03034	2.10104	1.84719	1.88422	2.12737	1.99412	1.9537	2.20282	1.99344	2.31092	2.16943	2.00022	2.0476	2.02771	2.16617	1.96724	2.08906	2.0615	2.19555	2.02255	1.91487	1.98783	2.30509	2.01866
LOC389906	4.4848	4.92907	5.5495	4.92895	5.00265	5.68765	5.3897	5.09649	4.28048	5.31644	4.59364	4.56136	4.17242	5.66175	4.5244	5.04448	5.25917	4.78066	4.80697	4.97978	5.10068	5.23186	4.48416	5.0451	5.32903	4.78171	4.473	4.79253	4.87548	3.58877	4.792	5.10952	5.29317	4.67248	4.88974	5.60699	5.33701	4.55173	4.789	4.78975	4.66255	4.78802
LOC101928841	3.5275	3.7431	3.80753	4.00262	4.16886	3.6402	3.89924	4.07122	3.82213	3.74154	4.06629	3.89204	3.93493	3.73567	3.76845	3.86505	3.82951	3.78521	3.98539	3.78226	3.74918	4.01819	4.16504	3.75211	3.64499	3.86494	3.84946	3.71615	3.59232	3.78842	3.48348	3.84847	3.74087	3.6744	3.92386	3.73374	4.071	3.87797	3.91896	3.69961	4.02264	3.73643
RAB11B-AS1	5.17197	5.62808	5.13823	4.14195	5.74845	4.75964	5.41438	5.46376	5.14093	5.57685	5.26161	4.72265	4.65544	4.59804	5.26605	4.36733	4.5661	4.8038	4.84939	5.09923	4.90772	4.77959	4.88119	5.35193	4.70481	4.72395	4.74236	5.03158	4.93124	5.81352	5.12944	5.59701	5.35063	5.79399	4.70311	5.08922	4.80897	5.06579	5.17903	5.69188	4.97012	5.06413
RASGRF2	4.55128	4.77177	4.44468	4.82698	4.90286	4.99398	4.91712	4.89928	4.73132	5.14028	5.00438	5.26968	5.32389	4.97622	4.50369	5.15746	4.84245	5.03797	5.47312	5.13327	4.80638	4.92073	5.18946	4.89642	5.72926	5.6916	5.33921	4.5295	4.77815	5.06502	4.51782	4.91195	4.95721	4.57032	4.86682	4.93131	4.98284	4.9229	5.34271	4.89599	4.70043	5.33912
TEX36-AS1	2.13008	2.13288	2.15506	2.21713	2.07134	2.1448	2.21878	2.11	2.34806	2.16139	2.20828	2.12975	2.2507	2.24916	2.15988	2.69718	2.25701	2.11562	2.07663	2.23427	2.12712	2.16139	2.11443	2.2263	2.26069	2.40683	1.96862	2.11366	2.06142	2.12145	2.43445	2.2014	2.20728	2.13129	2.14488	2.11951	2.17078	2.47011	2.11369	2.1697	2.11829	2.13443
MYLK4	2.94236	2.58353	2.58831	3.26576	2.99032	2.67474	2.96687	2.79977	2.69836	2.55156	2.22986	2.84701	2.88703	2.49411	2.96599	2.71999	2.57678	2.69457	2.72881	2.80318	2.4093	2.64031	2.89842	2.52495	2.68917	2.63793	2.71865	2.57315	2.82266	2.59627	2.89199	2.85497	2.7753	3.20218	2.84933	2.7322	2.69796	3.00308	2.85764	2.54736	2.85292	2.5918
SNAI3-AS1	3.35744	3.53371	3.62043	3.41291	3.33686	3.40618	3.48558	3.48252	3.28569	3.28536	3.60963	3.35841	3.43707	3.28447	3.71284	3.72473	3.50616	3.456	3.36684	3.30593	3.42019	3.48816	3.50823	3.52505	3.63558	3.28564	3.47389	3.43384	3.24848	3.16423	3.17141	3.24062	3.68186	3.61122	3.49734	3.53446	3.31795	3.43913	3.31349	3.36038	3.23342	3.52253
SAXO2	2.18058	2.09089	1.98881	2.07698	2.22831	1.97204	1.85671	1.79146	2.20228	2.10839	2.02581	2.05364	1.86743	2.15707	2.24916	2.20096	2.16136	2.03723	2.04765	1.89673	2.02897	1.96647	1.96017	2.01579	1.93026	2.10801	2.08628	1.97595	1.8495	2.04044	1.90953	2.32514	2.36295	2.10683	1.97141	2.19752	1.99548	1.88008	1.81025	2.07088	1.99909	1.97461
LOC105379178	3.07687	3.41033	2.90907	3.18401	3.58504	2.76726	3.17443	2.94441	3.08004	3.23992	3.56023	2.98595	3.07193	3.21321	3.09158	3.30594	3.19864	3.0874	2.99838	3.13146	2.99214	3.34875	3.06791	2.95682	2.57142	3.1014	3.07387	2.8259	2.82736	3.09092	2.88569	3.11545	3.28469	3.03167	3.0727	3.17407	3.2728	3.22923	3.06137	2.88458	3.20218	2.99305
MROH2A	3.25255	3.11772	2.94604	3.0102	3.08336	2.88115	2.78453	3.03313	3.09403	3.3216	3.36044	2.94204	3.22522	2.75691	3.05053	3.41366	3.15489	2.96542	3.1236	2.87362	2.98724	3.26399	3.25471	2.98817	2.89604	2.94281	3.221	2.9004	3.21715	3.03379	2.86911	3.00841	3.12916	3.0113	3.2409	2.94536	2.93005	3.04524	3.01868	2.91503	3.15917	3.03595
LOC101927516	2.65462	2.27923	2.88318	2.72376	2.86227	2.34103	2.5204	2.65808	2.78147	2.81036	2.9067	2.48878	2.52289	2.64418	2.58414	2.66869	3.0911	2.74925	2.37943	2.59962	2.64707	2.18012	2.8729	2.66858	2.32482	2.50217	3.14082	2.64335	2.75675	2.56408	2.42267	2.48777	2.45339	2.49221	2.5814	2.54812	2.52688	2.49336	2.80224	2.3321	2.56649	2.59312
LOC105374809	5.05652	4.44921	6.11644	6.2763	4.97057	4.55988	5.26772	4.57957	4.44045	5.01526	4.84906	4.91402	5.13428	6.10452	5.44148	4.89551	4.40923	5.37588	5.28619	5.84905	4.00473	4.7725	4.69373	4.2963	4.85806	5.04332	5.05021	4.93347	5.06455	5.26923	5.6365	4.08964	5.47546	4.3455	4.69237	5.49725	5.16914	4.92762	4.95846	4.38244	4.45777	4.77796
LINC00847	6.02697	4.64858	5.27341	4.84829	5.36198	4.82798	4.9888	5.22485	5.94901	5.19861	4.62474	5.86501	4.94826	5.14198	5.18961	4.89812	5.31027	4.74704	5.58674	5.1192	4.98657	5.43148	5.82806	5.3581	4.79558	5.30328	5.29875	4.78189	5.13132	5.66093	4.71329	5.78616	4.71167	5.06086	4.83898	5.04898	5.13927	4.59145	4.48227	5.10875	5.21187	4.64892
ANKRD36BP2	3.54723	3.89268	3.61798	4.62125	4.13044	3.71256	4.24437	3.86018	4.52528	3.78015	4.23342	4.73073	4.2592	3.64069	4.00826	3.80204	4.14017	4.73422	3.68645	3.8832	4.07733	4.43385	4.11632	4.23629	4.09035	3.82385	3.44077	4.4372	4.06905	4.41651	3.99082	3.96188	4.12708	3.68778	4.34709	3.54492	3.82302	3.98504	4.20275	4.20565	4.08289	3.88862
LOC100507516	2.28799	2.37558	2.61937	2.44519	2.24703	2.17443	2.21175	2.3739	2.46415	2.46293	2.61193	2.38099	2.2272	2.47341	2.26205	2.44854	3.07244	2.22971	2.38249	2.63423	2.24527	2.57757	2.16133	2.46571	2.56094	2.36931	2.46057	2.31118	2.58003	2.3776	2.18105	2.32184	2.42509	2.17489	2.51735	2.4666	2.39214	2.34579	2.4532	2.20228	2.44298	2.09906
RGS9BP	2.79795	2.52164	2.73642	2.88123	3.32215	2.49483	2.69224	2.82102	2.4626	2.9564	2.82142	2.85741	3.17111	3.28687	2.5758	3.16863	2.3112	2.39997	3.00992	2.67862	3.01976	2.72875	3.32747	2.71299	2.49555	3.21154	2.79473	2.92312	2.83751	2.51879	2.87884	2.85007	2.87323	2.91679	2.83135	2.60487	3.07151	2.77189	2.77394	2.8995	2.89336	2.77856
SRGAP2	3.0716	3.29061	3.22556	3.53836	2.902	3.26917	3.2453	3.14091	3.16396	3.16222	3.18472	3.15868	3.29472	3.12495	3.47868	3.07235	3.16885	3.2411	2.93039	3.06572	3.11093	3.22827	3.13234	3.07288	3.22167	3.24303	3.28508	3.28772	3.30564	2.94281	3.2452	3.45443	3.28824	2.93586	3.45916	3.06084	3.24453	3.43592	3.8889	3.36002	3.38571	3.46685
LINC00408	3.39853	3.5123	3.38815	4.33519	4.31822	3.38163	3.8964	3.71613	3.9612	3.81245	3.91854	3.40947	3.66241	3.97744	3.41998	4.08057	3.85496	3.73203	3.70405	3.60355	3.4008	3.83611	4.18538	3.42193	3.04049	3.66114	3.71412	3.73036	3.79593	3.67126	3.41582	3.70611	3.75974	3.4295	3.72683	3.68291	3.5155	3.66875	3.8889	3.50606	3.76409	3.79001
SEPTIN7P9	2.21148	2.47766	2.33606	2.07874	2.28765	2.61934	2.19075	2.4985	2.6021	2.4721	2.35818	2.18713	2.30016	2.2477	2.23147	2.37579	2.1562	2.36883	2.65456	2.44462	2.3668	2.29238	2.10848	2.33963	2.27044	2.44804	2.37386	2.46824	2.55035	2.05324	2.73555	2.62046	2.4965	2.21902	2.30142	2.39955	2.54231	2.34756	2.55574	2.22425	2.257	2.42241
VCPIP1	5.47557	5.56644	4.59341	5.19443	4.64594	4.84918	5.12615	5.00486	4.69767	4.84918	4.78109	5.07191	5.23586	5.14318	4.45918	4.96808	4.61532	5.34167	5.45986	5.44822	5.14747	4.82816	5.46213	5.23016	6.1184	4.64475	5.11671	5.62588	6.54437	6.67459	5.36366	5.93687	4.94283	4.98532	5.71423	4.36161	4.77497	5.83525	4.65476	4.71548	5.48269	5.33855
KIF6	3.42724	3.33722	3.42395	3.61795	3.54443	3.31791	3.68124	3.50806	3.3503	3.30163	3.68436	3.09972	3.391	3.62946	3.20264	3.43201	3.5962	3.26917	3.35006	3.39103	3.1763	3.48683	4.02896	3.17641	3.3005	3.63169	3.51019	3.26054	3.10541	3.15031	3.37116	3.46807	3.37442	3.34325	3.4896	3.18682	3.4352	3.29001	3.46083	3.01643	3.41619	3.29558
LOC100310756	6.98539	6.12351	6.54046	6.64084	6.8282	6.3688	6.56839	5.81422	6.52676	6.67309	6.04628	6.53105	6.05814	6.10875	5.56219	6.77603	6.60115	6.61436	7.40545	6.20655	6.00917	5.51838	6.42826	6.39251	6.40389	6.1261	6.57759	6.88002	7.01773	8.34618	6.35341	6.39964	5.08337	6.28772	5.99486	5.64179	6.09543	6.56438	5.49279	6.05061	6.51588	6.84403
LOC375196	2.70446	2.45449	2.44753	2.57262	2.24195	2.05514	2.35313	2.26945	2.32483	2.42341	2.2862	2.34808	2.46433	2.31655	2.22517	2.35802	2.41086	2.35103	2.59682	2.14109	2.40708	2.29892	2.45309	2.19952	2.57313	2.20949	2.3552	2.47904	2.277	2.27479	2.19032	2.62046	2.277	2.33611	2.23522	2.3976	2.51785	2.26625	2.20578	2.34813	2.56231	2.3352
LOC100506271	4.25831	3.75454	3.92935	3.68812	4.15726	3.55224	3.56014	3.96255	3.93035	4.02325	3.92175	3.62787	3.72872	3.78093	3.54957	4.05663	3.88925	3.81772	3.84454	3.98795	3.88686	3.57234	3.93512	3.76368	3.76086	3.17713	4.01967	3.53512	3.66423	3.54428	3.69792	3.71356	3.74437	3.6383	3.32891	3.67667	4.06169	3.75998	3.63935	3.34484	3.73165	3.70715
EIF1B-AS1	4.76107	4.92004	5.17319	5.49304	5.27257	4.80703	4.94822	4.99279	5.01037	5.17262	5.39417	4.98311	4.93649	5.10152	5.01561	4.96371	5.03606	5.20914	4.96015	4.8842	4.78145	4.96451	5.07171	5.00951	4.54892	5.30614	4.92285	4.83864	4.83828	4.79926	4.77038	5.14044	5.48257	5.03146	5.19313	5.35369	4.84496	4.961	5.50326	4.9187	4.97819	5.021
LINC01771	2.24993	2.65175	2.79709	2.71938	2.32557	2.29129	2.26452	2.24404	2.36319	2.36202	2.2678	2.16014	2.44711	2.29776	2.1471	2.00419	2.20188	2.07526	2.26386	1.97594	2.25263	2.89744	2.36102	2.29857	2.12981	2.20501	2.02752	2.10842	2.43265	2.07393	2.27266	2.41702	2.45181	2.21542	2.19685	2.14613	2.07615	2.33684	2.31133	2.27989	2.04088	2.13072
C20orf202	4.44027	4.35098	4.1671	4.33738	4.13401	4.15233	4.57166	4.75699	4.33381	4.25952	4.1598	4.30394	4.36192	4.57264	3.90938	4.55065	4.44027	4.42405	4.36278	4.1384	4.32816	4.35326	4.36786	4.53752	4.24543	4.09711	3.84946	4.38941	4.17668	4.95189	4.41207	4.19916	4.66795	4.40688	3.8005	4.01511	4.51065	3.99677	4.39142	4.05638	4.59921	4.4506
MYRFL	2.51192	2.40852	2.4706	2.82938	3.1085	2.59345	2.25339	2.63626	2.35007	2.49347	2.79795	2.22764	2.35848	2.73835	2.57217	2.64561	2.61919	2.49112	2.11103	2.49088	2.47891	2.50406	2.68823	2.82195	2.87723	2.54061	3.61162	2.63753	4.40217	3.46905	2.20849	2.78394	2.74297	2.62633	2.70751	2.76062	2.78907	2.72506	2.46264	3.02771	2.87937	2.35582
LOC101928896	3.31987	3.17646	2.97037	3.98388	3.3363	3.26761	2.84989	3.10723	3.1291	3.13729	3.36649	3.05831	3.52269	2.87695	3.11647	3.22743	3.36778	3.10195	3.04927	3.21306	2.93729	3.45301	3.62826	3.09143	3.10731	3.33218	3.04777	2.98861	3.10016	3.03127	2.91921	3.19424	3.85367	2.90884	3.45457	3.57994	3.14995	3.23004	3.45457	3.01683	3.20753	3.14209
LOC100506016	2.3631	2.1477	2.39594	2.00981	2.23235	2.1004	2.23759	2.22439	2.20228	2.23834	2.26357	2.27247	2.02593	2.12335	2.02831	2.11736	2.32489	2.16763	2.19981	2.12726	2.04863	2.17703	2.3416	2.19611	2.13026	2.19249	2.23977	2.22725	2.13009	2.09941	2.08429	2.35461	1.95952	2.16538	2.31684	2.21688	2.29129	2.24562	2.37547	2.2074	2.19856	2.01981
POM121L12	6.26743	6.26274	6.31228	6.57602	6.86446	6.11137	6.28676	6.68782	6.36063	6.52557	6.51831	6.18319	6.44714	6.09098	6.26006	6.54982	6.51535	6.02467	6.31189	6.38309	6.09798	6.91246	6.66987	6.3792	6.08802	6.17085	6.29517	6.21539	6.0558	6.35646	6.17977	6.38959	6.71456	6.13384	6.32204	6.54747	6.60759	6.34043	6.63419	6.2504	6.45225	6.21689
LOC100287015	2.41939	3.09017	2.53993	3.1493	2.58783	3.30784	2.42656	3.03943	2.68949	2.44874	3.1646	2.75828	2.49953	2.81577	2.74278	3.86768	3.28558	2.69727	2.57118	3.34141	2.74846	2.75828	2.5469	2.70987	2.48361	2.56856	2.88168	2.60803	2.91097	2.36472	2.83071	2.73597	3.25354	2.31372	2.92743	2.60264	2.68965	3.26348	3.28659	2.93114	2.50564	2.80559
LINC00899	3.86371	3.59407	4.07752	3.48693	3.87591	3.79401	3.90799	3.65014	3.54219	3.73742	3.89484	3.83984	4.08261	3.9671	3.8506	3.72873	4.00895	3.52596	3.95093	3.66983	3.76208	3.67425	3.99831	3.63256	3.64654	4.01693	3.95231	3.93246	4.11863	3.75663	3.47369	3.9067	4.32414	3.90284	4.00022	3.71395	3.94693	4.00567	4.14224	3.32326	3.89428	4.00583
PRRT3	4.45758	3.81033	4.34989	4.08514	3.98615	3.96391	4.29177	4.11695	3.72018	4.67593	4.39769	4.25606	4.09389	3.95404	4.59933	4.07231	4.11618	4.02879	4.56553	4.41653	4.25982	3.83809	4.02431	4.01967	4.10363	3.72466	3.97178	3.76236	4.09722	3.88476	4.32012	4.14134	3.94926	3.7883	3.90132	3.28993	4.05382	4.06877	4.57412	4.71074	4.20374	3.79529
PCARE	2.85396	2.47411	2.75163	3.23709	3.02798	2.50669	2.80974	3.16359	2.8498	2.95838	2.96399	2.79079	3.25867	2.69718	2.8876	3.0792	2.86747	3.04773	2.81903	3.11004	2.89247	2.92202	3.25456	2.87693	2.72454	3.07567	3.10589	2.51861	3.19298	2.85915	2.65297	2.94826	2.93063	2.87368	2.81924	2.93501	2.94602	2.67084	2.81067	2.75163	2.8016	2.81529
MIF-AS1	5.18904	5.04476	5.75966	4.99268	5.85381	4.95401	5.33423	5.15156	5.70715	5.5436	4.80725	4.5297	4.95564	4.67179	4.92065	5.20652	4.67213	5.16281	5.05683	4.65722	5.09546	4.96516	4.78487	5.2221	4.64199	5.03964	5.35098	4.94658	5.02215	4.75476	4.87884	5.4052	4.65399	4.63223	4.78179	4.56713	4.64615	4.92104	5.83828	5.07463	5.29164	5.31074
MAPK12	5.45464	5.229	5.88487	5.96396	5.96922	5.11615	5.31503	5.50932	5.13843	5.53134	5.92186	5.24829	5.42071	6.44324	5.00519	5.47738	5.34456	5.42574	5.41397	5.26567	5.2405	5.39494	6.26968	5.3922	4.897	5.89133	5.28319	5.28079	5.32476	5.42339	4.99386	5.46391	6.02906	4.92584	5.59439	5.49139	5.84686	5.41582	5.77501	5.41954	5.67283	5.36793
LOC150051	3.25788	2.77265	2.61162	3.2779	3.78384	2.55739	3.30744	3.08326	2.87324	3.19619	4.02938	2.68728	3.04007	3.60292	3.18118	3.21315	3.51477	3.14124	4.68393	3.40047	2.97438	3.1024	3.59298	4.0751	2.7745	3.11412	3.15047	4.15315	2.75675	3.35189	2.41901	3.07963	3.43226	3.07534	3.53505	3.32844	3.28253	3.15456	4.12363	3.61577	3.70728	3.38326
EIF4A2	2.17076	2.18945	2.30017	2.15801	2.24613	2.29129	2.0399	2.23981	2.22917	2.33743	2.28991	2.10815	2.13655	2.508	1.90658	2.05505	2.47292	2.3967	2.31287	2.17591	2.20327	2.19494	2.32296	2.25576	2.23981	2.23336	2.16131	2.46749	2.31102	2.20228	2.28811	2.25945	2.45286	2.25266	2.22907	2.23981	2.18918	2.37404	1.98141	1.98793	2.23492	2.19724
LOC101927531	2.60367	2.82668	2.30543	2.88275	2.65526	2.5039	2.49555	2.75513	2.6691	2.75287	2.70991	2.72245	2.74174	2.62183	2.48225	3.11709	2.46877	2.552	2.36506	2.72245	2.30812	2.83287	3.08632	2.62068	2.49638	2.46306	2.82822	2.86652	2.81312	2.5512	2.50522	2.62976	2.76366	2.62859	2.96483	2.81976	2.68209	2.75841	3.05017	2.72021	2.95389	2.46744
ADAMTS9-AS2	3.3167	3.85132	3.84337	3.71884	3.57974	3.9034	4.0902	3.2577	3.77299	3.75723	4.2454	3.56965	3.84751	4.05569	3.5014	3.7435	3.94493	3.68078	3.60492	3.53602	3.6229	3.82759	3.54402	3.68903	4.19936	4.72905	3.87077	3.68465	3.42386	3.39839	3.8528	3.69879	3.74641	3.78676	4.03558	4.22688	3.78676	3.66553	3.55412	3.47433	3.47671	3.57446
LY86-AS1	2.46603	2.69404	2.4741	2.7915	2.55785	2.33394	2.88293	2.78343	2.54303	2.42011	2.78501	2.57382	2.99153	3.07235	2.41732	2.5372	2.70806	2.66672	2.58044	2.46076	2.38416	2.72774	3.14105	2.47826	2.42818	2.6979	2.52179	2.52909	2.61003	2.58906	2.43068	2.57762	2.9372	2.53278	2.68152	2.69892	2.52118	2.60404	2.94858	2.29554	2.69403	2.55656
OLIG3	2.36432	2.50721	2.87384	2.42753	2.65327	2.38903	2.59539	2.71173	2.30272	2.6961	2.40792	2.65125	2.51257	2.31896	2.44983	2.70109	2.54327	2.45081	2.34514	2.59034	2.37161	2.52948	2.49014	2.30442	2.40912	2.45254	2.45955	2.49646	2.2829	2.30047	2.45484	2.57873	2.77569	2.46686	2.69718	2.53741	2.8421	2.37404	2.56965	2.52647	2.52647	2.24562
FAM185A	5.01854	5.38775	5.51042	6.63516	4.11025	6.54947	5.76028	4.96474	4.83479	6.71654	6.42524	4.73446	6.98182	6.44081	5.01698	5.02184	5.34691	5.60603	4.24847	4.31745	4.85708	5.02759	4.60269	4.67903	5.11484	5.981	5.0262	5.45042	6.55386	5.29234	5.34391	5.82349	7.66922	6.92447	6.45433	6.82949	5.30594	6.56328	7.16982	4.4013	5.79922	6.72596
LOC105370622	3.05639	3.39541	3.00963	3.32386	3.39029	2.86165	2.88307	3.54709	3.24598	3.44114	3.61376	3.15777	3.83711	3.27516	3.17074	3.52665	3.64459	3.29431	3.57192	3.13649	3.05606	3.55171	3.56237	3.42969	3.06699	3.44619	3.36944	3.28381	3.17353	3.22168	3.06906	3.37234	3.66423	3.08011	3.47044	3.22676	3.36183	2.98171	3.37134	2.97866	3.40763	3.18674
LOC100507389	2.49716	2.2472	2.82102	2.15738	2.49143	1.97603	2.21878	2.36533	2.53537	2.24156	2.81287	2.28805	2.38151	2.16127	2.38151	2.28514	2.30459	2.22288	2.38953	2.24497	2.20996	2.67881	2.42509	2.3039	2.17755	2.01837	2.56144	2.23022	2.06204	2.19584	2.24904	2.32466	2.39436	2.19843	2.08329	2.26434	2.3377	2.26127	2.36011	1.99404	2.24156	2.23845
ZNRF2P1	2.22631	2.77466	2.31943	2.29613	2.2115	2.32994	2.0399	2.42509	2.20584	2.13413	2.28362	2.55266	2.25231	2.21779	2.26685	2.36887	2.38182	2.11401	2.43656	2.56373	2.27782	2.54723	2.16311	2.17551	2.25044	2.28224	2.18374	2.05098	2.22034	2.08775	2.26209	2.24087	2.27926	2.24077	2.28868	2.35445	2.13827	2.39161	2.32994	2.36475	2.30787	2.26795
LINC01785	3.82136	3.59601	3.98209	3.78516	3.58888	3.46156	3.73243	3.62193	3.92061	3.56036	3.54462	3.59262	3.82375	4.24151	3.47838	3.85508	3.74212	3.6837	3.67096	3.76236	3.55104	3.80912	4.02278	3.78281	3.58801	3.7354	3.62069	3.64512	3.5715	3.7113	3.33881	3.4266	3.62016	3.39657	3.53183	3.57591	3.95503	3.59997	4.02051	3.56952	3.68637	3.56491
LINC00879	2.56734	2.39201	2.51754	2.75463	2.49547	2.20568	2.35313	2.6176	2.49925	2.49892	2.45352	2.2055	2.59027	2.48045	2.22273	2.52524	2.46251	2.40225	2.19198	2.38762	2.25496	2.60668	2.49381	2.78619	2.28299	2.29235	2.46294	2.60337	2.30825	2.56672	2.24394	2.26275	2.49422	2.48034	2.82703	2.74971	2.43134	2.49093	2.80689	2.20228	2.29805	2.43996
KRTAP19-1	1.95478	2.08291	2.12741	2.24098	2.14491	1.83459	1.96748	2.08134	2.17516	2.04233	2.39234	1.944	2.02617	1.91847	2.26966	2.30672	2.04253	2.29673	2.07755	2.18289	2.03017	1.95235	2.19251	2.04418	2.16762	2.00316	1.94836	1.89924	2.09769	2.04728	1.92452	1.96565	2.1951	1.99994	2.26795	2.08234	2.10835	2.21003	2.39174	2.08069	1.9441	2.06685
LINC00515	2.49716	2.35569	2.32656	2.31414	2.46221	2.2321	2.21225	2.35896	2.35177	2.24156	2.1307	2.15903	2.33646	2.36796	2.15622	2.34285	2.49899	2.1098	2.10349	2.09322	2.30812	2.30398	2.30447	2.25576	2.12883	2.31336	2.25863	2.11653	2.16163	2.00003	2.15752	2.00296	2.43518	2.24595	2.16163	1.99345	2.41164	1.92914	2.39654	2.21501	1.94803	2.37538
C8orf34-AS1	2.38074	2.1907	2.00581	2.6237	2.12461	2.03064	2.28016	1.92335	1.90475	2.23976	1.93045	2.09616	2.48074	2.06788	2.19448	2.24875	2.11073	2.31192	1.90988	2.09402	1.85858	2.45688	2.12426	2.04084	2.19036	2.03283	2.34823	2.28757	2.05203	2.1857	1.93862	2.51612	2.02185	2.23105	2.23099	2.18882	2.09348	2.02219	2.20836	1.98574	2.03991	2.3002
LRRN4CL	4.03435	3.35383	3.88605	3.69801	3.78822	4.88689	3.92549	3.85679	3.62624	3.49074	3.45149	4.89253	3.72481	3.8114	3.51829	3.50242	3.49074	4.63873	4.40661	5.39286	3.86284	3.85999	3.64463	3.98395	4.50974	5.15766	3.6996	3.4817	3.45336	3.30353	5.09358	4.24233	3.39918	3.90523	3.53505	3.40915	4.55808	3.75998	3.73998	4.31874	3.27592	3.75998
LOC400622	2.62683	2.56973	2.90829	2.8001	2.87894	2.58504	2.72945	2.70089	2.58993	2.808	2.66559	2.46595	2.89243	2.86389	2.52625	2.62641	2.99115	2.44562	2.6337	2.6409	2.5662	2.72814	2.82905	2.98544	2.52302	2.61654	2.57703	2.84366	2.60313	2.5246	2.33529	2.68671	2.71637	2.78875	2.88832	3.11608	2.71657	2.49842	2.72146	2.44194	2.75764	2.88966
EXTL3-AS1	2.63724	2.85013	2.79329	3.07283	2.62046	2.76129	2.4816	2.68135	2.70656	2.75326	2.83791	2.78399	2.94354	2.82791	2.96424	2.78725	2.61454	2.60373	2.57567	2.78522	2.81322	2.72234	2.81875	2.75475	2.78162	2.68854	2.78522	3.09695	2.69223	2.7837	2.98183	2.95914	3.04355	2.97212	2.70769	2.83946	2.71702	3.05912	3.1043	2.81203	3.12129	2.82968
LINC00606	2.79252	2.34873	2.57964	2.4909	2.43688	2.33273	2.35599	2.28553	2.27322	2.52077	2.37526	2.23587	2.51759	2.27104	2.51451	2.58085	2.33266	2.15826	2.34173	2.3671	2.28527	2.51701	2.42509	2.30812	2.20572	2.66052	2.65866	2.28358	2.20006	2.63205	2.37415	2.39234	2.43064	2.16153	2.39325	2.58671	2.38162	2.58949	2.16213	2.37404	2.44929	2.35401
LINC00928	3.21438	2.91703	3.35968	3.00607	3.85285	3.14144	3.05293	3.40465	3.41949	3.42305	3.23112	3.13193	3.10978	3.25018	3.43426	3.37595	3.24614	3.19596	3.25745	3.24458	3.17129	3.42874	3.20493	3.27587	3.01748	3.29526	3.38423	3.22405	2.95205	3.16228	2.73555	3.28967	3.58095	3.48545	3.43702	3.2212	2.96487	2.88482	3.18826	3.08325	3.39862	3.03001
LOC100506274	3.68492	3.42742	3.37781	3.71085	3.84899	3.48468	3.58568	3.58565	3.69598	3.69579	3.67845	3.6254	3.79227	3.70405	3.55782	3.48883	3.65246	3.44451	3.82217	3.48761	3.76208	3.60835	4.19524	3.63713	3.53482	3.64479	3.56416	3.69533	3.68089	3.82679	3.6254	3.47988	3.34951	3.61476	3.4322	3.3405	4.22813	3.45131	3.62138	3.60019	3.82121	3.72591
ARHGAP22-IT1	3.28526	3.06984	3.02541	3.43032	3.70878	2.79795	3.21538	3.26303	3.19686	3.02411	3.20887	3.18801	3.3914	3.2568	2.95826	3.25762	3.60571	3.40372	3.35164	3.35552	3.16571	3.45169	3.46313	3.37461	3.16274	3.15587	3.33609	2.9767	3.01854	3.23558	3.00003	3.37077	3.31863	2.9152	3.08461	3.24618	3.23433	3.26626	3.0779	3.28208	2.99666	3.24343
ZNF80	2.60405	2.72563	2.72263	2.72812	2.81032	2.40305	2.35313	2.89272	2.6423	2.80844	2.69034	2.60371	2.6479	2.63696	2.49056	2.67093	2.84252	2.72555	2.5983	2.72543	2.60273	2.94563	2.75222	2.53341	2.43981	2.78527	2.63929	2.46235	2.59272	2.45184	2.53955	2.46766	2.76616	2.72281	2.77344	2.58236	2.71373	2.6479	2.72565	2.64412	2.67762	2.35845
LOC105376166	3.78862	3.8325	4.05041	4.1329	4.27145	3.90239	3.73197	3.79432	3.7399	4.03866	3.97529	3.55928	3.99872	3.93045	3.90773	3.8896	3.84946	3.97408	3.84656	4.08338	3.82427	3.91217	3.98844	3.98476	3.87345	4.00507	4.16508	3.91391	3.91829	3.60835	3.7106	4.00188	4.09431	3.88679	4.11366	3.75676	4.15656	3.50091	4.01234	3.89113	3.84059	3.70303
LOC285097	2.11429	1.98639	2.0859	2.31019	2.04403	2.02441	2.06982	2.31526	2.07707	2.0507	2.10602	2.06168	2.20722	2.07508	2.3143	2.47108	2.01816	1.98445	1.96873	2.14821	1.9489	2.2636	1.96349	2.10277	1.84313	2.12185	2.2163	2.07436	1.91983	1.87802	2.03608	2.13081	2.07461	2.35144	2.23241	2.18341	1.7507	1.96937	2.04658	2.14782	2.43872	1.97479
LRRC52	4.37325	4.58469	4.3849	4.73041	4.82853	4.33725	4.71127	4.636	4.68109	4.4939	4.58393	4.3762	4.6078	4.49878	4.54765	4.80263	4.77124	4.50067	4.77112	4.44446	4.48372	4.79322	4.64234	4.69482	4.56063	4.46353	4.3762	4.65403	4.59251	4.71436	4.50199	4.80274	4.9286	4.69857	4.84604	4.48591	4.69017	4.68104	4.64122	4.53704	4.86473	4.54911
LINC01365	3.36946	3.04923	2.81016	3.38357	3.70202	2.86686	3.0368	3.24281	2.90669	3.04923	3.31222	3.19616	3.12737	3.04299	2.91329	3.35884	2.96078	2.96064	3.05497	3.1123	2.95543	3.32872	3.25175	3.02457	2.95573	3.13833	2.91187	3.10599	3.11042	3.08496	2.80572	3.3696	3.35884	2.95806	3.11796	3.01744	3.06721	2.88419	3.42603	2.95151	3.10214	3.01088
COL1A1	11.2692	11.1788	11.255	11.2446	10.6825	12.0522	11.6615	11.6717	10.7845	11.3435	11.689	11.8994	11.0572	11.7438	11.4887	11.5171	11.2788	10.9147	11.8047	12.1642	11.5733	12.1264	11.3544	11.853	12.4574	12.3872	11.7222	11.152	11.9672	11.4003	11.503	12.0954	10.8132	11.7099	12.2003	11.6744	11.6459	11.8603	12.2755	11.9131	10.2523	11.615
LOC105374989	2.14131	2.31012	2.1748	2.04979	2.11345	2.04212	2.13201	2.24225	2.3393	1.98381	2.1252	2.16014	2.22828	2.24784	1.97475	2.21668	2.1822	2.0816	2.26754	2.13605	1.94003	2.17038	2.0705	2.14791	2.19437	2.33446	2.04994	1.94936	2.00569	1.94798	2.14393	2.13155	2.16455	1.99672	2.05947	2.13464	2.32461	2.12432	2.19806	2.14664	2.09642	2.05633
LINC00605	2.34538	2.70346	2.94724	3.13896	3.13283	2.4014	2.62085	2.70737	2.56426	2.80875	2.73495	2.62805	2.92618	3.5226	2.41717	2.85466	2.93443	2.50362	2.66355	2.42223	2.37728	2.71437	3.08481	2.73516	2.63919	2.9368	2.58968	2.56683	2.69718	2.85507	2.15236	2.63265	2.94952	2.2914	2.67446	3.04006	2.71124	2.4629	3.03777	2.35029	3.05974	2.49917
LINC01210	6.95735	7.24384	7.11423	7.43483	7.77823	6.83348	7.02632	7.13687	6.97965	7.22523	7.68117	6.7522	7.36533	7.34513	6.98289	7.30758	7.20559	7.23004	7.11168	7.10822	6.9206	7.64041	7.57774	7.06088	6.76028	7.46171	6.99492	7.10097	6.90989	6.95831	6.84605	7.28663	7.60601	7.08725	7.07909	7.42861	7.52917	6.97743	7.55848	6.84663	7.0528	7.14442
NFIA-AS2	3.09531	3.17881	3.29615	3.59746	3.86291	3.27129	2.9715	3.18769	3.2705	3.17148	3.89133	3.09827	3.34488	3.93625	2.96482	3.93461	3.50756	3.41164	3.38175	3.12645	2.94986	3.51829	3.78693	3.33963	2.96978	3.48027	3.41626	3.42923	3.02764	3.08533	3.02648	3.27649	3.77859	3.27148	3.10673	3.17235	3.52055	3.35631	3.76177	3.03902	3.58019	3.23648
C12orf74	2.26064	2.46392	2.3721	2.32882	2.54296	2.18844	2.35025	2.24275	2.38872	2.43573	2.63057	1.94695	2.24904	2.08113	2.42392	2.19114	2.56905	2.19337	2.5624	2.04337	2.12831	2.48128	2.21533	2.34643	1.93726	2.16172	2.37306	2.06895	2.02778	2.23486	1.92906	2.25543	2.06514	2.21878	2.10492	2.14516	2.11547	2.04337	1.95776	2.27473	2.19661	2.09347
DLG1-AS1	2.49716	2.45783	2.35237	2.4258	2.90733	2.35298	2.46645	2.44572	2.56297	2.42708	2.9874	2.81086	2.46221	2.72636	2.51892	2.69805	2.48611	2.67862	2.71922	2.49683	2.48219	2.66871	2.7044	2.71453	2.55498	2.92534	2.43542	2.71105	2.56297	2.56297	2.56297	2.40302	2.79037	2.53042	2.41606	2.61182	2.47134	2.46574	2.73579	2.38637	2.55214	2.62189
LINC00692	2.1294	2.13017	2.20383	1.96607	2.2958	2.17448	2.03501	2.01286	1.99334	2.12085	2.1288	2.30913	2.13201	2.26584	2.30133	2.50082	2.10801	1.98302	2.30933	1.94982	2.11198	2.0555	2.1382	1.94729	2.05247	2.04226	1.90708	2.14449	2.23912	2.15465	1.87881	2.17574	2.1504	2.02153	1.95987	2.12517	2.01388	1.90078	2.14724	1.98339	2.10264	2.01048
LINC00868	4.21127	3.80659	4.18344	4.16896	4.53753	3.79584	4.42924	4.1455	4.08033	4.04181	4.42924	3.91028	4.188	4.29822	3.97692	4.20259	4.13736	4.12928	4.58871	4.0121	4.30416	4.24136	4.42962	4.23043	4.29232	4.27151	3.74401	4.00288	4.3114	4.16565	3.9034	4.38451	4.11532	4.27872	4.41656	4.20148	4.11437	4.24136	4.1425	4.07752	4.14651	4.00126
KIAA2012-AS1	2.78099	3.03933	3.11844	2.86766	2.9289	2.65344	2.87683	3.1513	2.93914	2.53803	2.71241	2.78153	2.93914	2.99388	2.64437	3.24645	2.86113	3.3361	2.93008	2.8306	2.60215	2.80223	3.50079	2.98649	2.58315	2.82046	2.90136	2.83278	2.85466	2.69718	2.76222	2.94168	2.7792	2.95389	3.24765	2.95389	2.73381	2.80215	2.95226	2.76643	3.27352	2.85347
TRIM50	3.47627	3.60673	3.51616	3.65516	4.10274	3.32038	3.77626	3.51873	3.5637	3.66924	3.93056	3.42607	4.00359	3.65323	3.80201	3.37551	3.98769	3.62559	3.65722	3.66777	3.34996	3.64376	3.80303	3.44506	3.56925	4.13437	3.68026	3.46796	3.57503	3.47537	3.28013	3.95413	3.69953	3.73521	3.53586	3.619	4.01461	3.73701	3.7197	3.53168	3.71028	3.62519
LYRM4-AS1	3.78595	3.57048	3.33857	3.74624	3.93209	3.55217	3.38534	4.2271	3.69803	3.81142	3.79924	4.23332	3.69631	3.68761	3.87271	3.72756	3.59782	3.62963	3.85885	3.67243	3.81753	3.70764	4.90316	3.89744	4.07469	3.83919	3.61666	3.77966	3.79778	3.54132	3.7286	3.88537	3.87816	4.15023	3.6443	3.57642	3.6901	3.63904	3.76355	3.4303	3.4791	3.63947
ENTPD3-AS1	2.33517	2.52781	2.77028	2.35253	2.29191	2.30803	2.39452	2.30058	2.32747	2.37267	2.55107	2.35032	2.3884	2.37435	2.73673	2.64644	2.08926	2.55879	2.55574	2.18969	2.56765	2.30905	2.52855	2.73068	2.33813	2.4643	2.22315	2.07331	2.3693	2.29171	2.39135	2.39108	2.30238	2.33405	2.38694	2.48642	2.31398	2.3043	2.52228	2.29943	2.22798	2.24562
FAM229A	4.87785	4.87279	4.93296	5.31807	5.90787	4.81944	4.82566	5.21957	5.05484	5.24567	5.43696	4.68648	5.23634	5.50447	5.18773	5.36151	4.95437	5.03346	4.88599	4.95495	4.79717	4.94524	5.45313	5.21577	4.8678	5.1888	5.0285	4.81	5.1542	5.28647	4.88158	4.87287	5.51019	5.13583	5.18944	5.16084	5.62547	5.28075	5.33985	4.94783	5.32756	5.46032
LOC286178	2.85228	3.31031	3.26505	2.99861	2.94684	2.81332	3.17303	2.97661	3.4388	2.92597	3.13401	2.94833	3.0887	3.19083	2.97379	3.56469	3.15268	3.01507	3.00989	3.12224	2.96993	2.73353	3.17303	2.99698	3.10731	3.03844	2.96791	2.60426	3.02907	3.30442	2.9989	2.62046	3.20639	3.03344	2.96093	2.61749	3.62141	3.0692	3.0361	2.95941	2.96691	2.99237
ZNF778	3.50305	3.37221	3.03401	2.85024	3.17801	3.07568	2.70215	3.12429	3.26792	3.22614	3.19997	2.96944	3.23217	3.09332	3.29398	3.37566	2.92555	2.91879	3.11395	3.20515	3.22166	3.17271	3.22171	3.17123	3.26761	3.10433	2.91449	3.28147	2.93135	3.21337	3.21298	2.90104	3.18946	3.24708	3.58231	3.28147	2.91866	3.2909	3.17438	2.9953	3.21895	3.17323
ST20-AS1	3.75313	4.42345	4.01093	3.85676	3.88211	3.86841	3.9523	4.17692	3.8938	4.24116	3.49837	4.07726	4.01982	3.44619	4.02147	4.05416	4.63834	4.37387	4.10045	4.01877	3.78106	4.45296	3.74672	3.88378	4.13159	4.08888	4.27535	4.17749	4.14796	4.47944	4.31896	4.22126	3.72553	3.84211	4.17692	4.50244	3.69796	3.87169	3.22197	3.65446	4.57481	3.33231
LINC00901	2.19004	2.07079	2.43937	2.18025	2.28507	2.10468	2.27874	2.19842	2.02477	2.36392	2.46036	2.131	2.42341	2.21629	2.08314	2.414	2.33603	2.195	2.31859	2.05677	1.89866	2.222	2.22497	2.15127	2.1225	2.02477	2.3171	2.04255	2.07961	2.13796	1.98639	2.20037	2.34617	2.12999	2.13458	2.43412	2.31008	2.29181	2.24781	2.53958	2.23134	2.11207
SHISA9	2.69542	2.78863	2.97015	6.71213	2.83326	2.94677	2.68767	3.11395	2.82908	3.40731	3.17927	2.9307	3.2585	5.841	2.67779	3.05625	3.36355	3.18467	2.94344	3.14852	2.79467	3.14241	5.67917	2.95019	2.81595	3.14244	3.06498	2.89051	2.77982	2.87626	2.9307	3.97718	3.07721	2.86755	2.87586	2.89325	3.32773	3.50124	3.01445	2.74705	3.37051	2.87465
SNHG28	3.44025	3.46342	3.21026	3.18826	3.38664	3.23503	3.40241	3.41909	3.31042	3.47078	3.32842	3.30975	3.18196	3.38595	4.13693	3.55067	3.18966	3.24502	3.25728	3.32443	3.49946	3.15364	3.31502	3.28103	3.17999	3.61194	3.21882	3.09832	3.13387	3.46311	3.23668	3.39425	3.54596	3.25711	3.45309	3.16277	3.35558	3.05222	3.28538	3.27965	3.22497	3.51096
LINC02724	2.56144	2.51145	2.27816	2.7325	2.80537	2.28227	2.5243	2.62343	2.45889	2.65716	2.58146	2.24129	2.26329	2.75456	2.50514	2.6959	2.43556	2.35923	2.4857	2.27221	2.46589	2.29129	2.46451	2.6346	2.14504	2.41053	2.67703	2.47342	2.65289	2.56639	2.46873	2.36501	2.5243	2.63948	2.23099	2.38142	2.77559	2.65656	2.36859	2.60551	2.88677	2.35537
BISPR	4.42549	4.26321	4.45058	4.03127	4.95212	4.13779	4.88646	4.86324	4.28483	4.4808	5.66483	5.48327	4.15753	4.93165	4.14959	4.70519	4.71417	4.54799	5.19532	5.06408	4.26586	4.18172	5.35349	5.32127	5.16323	4.60766	5.20669	6.60078	5.34909	4.88646	4.14279	5.39488	5.06614	5.85262	4.48648	4.82093	4.85871	4.3644	4.23414	4.43494	4.47641	3.65818
LINC01553	2.15996	2.09286	2.12782	2.21828	2.50736	2.10289	2.54613	2.11265	2.02362	1.96581	2.16197	2.01971	2.34681	2.40568	2.10862	2.41125	1.97775	2.12214	2.10379	2.09918	2.03448	2.21878	2.19729	2.00786	2.10221	2.26427	2.17939	2.23736	2.08906	2.18668	1.97314	2.26012	2.22272	2.0176	2.34096	2.03583	2.35426	2.24562	2.47762	2.10731	2.29974	2.16795
ANKAR	2.02746	1.99082	2.12453	2.12001	2.02877	2.17848	2.20698	2.09625	2.21695	2.24908	2.37072	2.09669	2.29234	2.21418	2.13476	1.93239	2.05009	2.12857	2.10006	1.99182	2.46587	1.99539	2.22248	2.19094	2.20512	2.04197	1.96747	2.22435	2.0845	2.0368	1.9721	2.25945	2.36608	2.44681	2.14829	1.92453	2.10227	2.15555	2.37953	2.14371	2.27176	2.3072
GTSE1-DT	2.92187	2.8055	2.72498	2.99213	2.76268	2.80683	2.7602	2.8416	2.80411	3.08226	3.2193	2.77337	2.68296	3.01469	2.85408	2.67347	2.81684	2.7353	2.87617	2.78458	2.79884	2.7664	3.25978	2.93615	2.63463	3.00001	2.62755	2.58349	2.61339	2.86469	2.71202	2.55707	3.13028	2.84548	2.87103	2.81894	3.08298	2.73044	2.77768	2.61134	3.1956	2.91733
LOC100506142	3.58977	3.3773	3.52968	3.71811	3.71811	3.15653	3.5587	3.50973	3.40371	3.64419	3.60268	3.20528	3.45673	3.8527	3.43426	3.32773	3.52312	3.31902	3.53662	3.13947	3.18765	3.33253	3.48277	3.72609	3.1135	3.46502	3.28425	3.44124	3.6656	3.44736	3.44609	3.45919	3.57642	3.35238	3.327	2.99055	3.34062	3.30566	3.42154	3.37155	3.38775	3.58079
TTC6	2.67862	2.78987	2.86836	2.94223	3.00442	2.89885	3.17139	3.15637	2.91952	3.33178	3.13283	3.11018	3.00712	3.02821	2.81527	3.10321	3.20329	2.71477	3.35929	2.91178	2.92361	3.34875	3.36649	2.95865	2.68734	2.80543	3.08032	2.84217	2.69951	3.07568	2.80038	3.49358	3.00624	3.15032	3.14752	3.05605	3.18288	2.87396	3.13607	2.91619	3.19774	3.07061
FTCDNL1	2.76093	4.23044	4.25104	2.85776	2.71994	2.76226	2.79544	3.25195	4.01088	2.60841	2.82767	2.68621	3.39488	3.06389	3.71948	2.5159	3.10603	3.33764	2.89235	3.58414	3.06777	2.87239	2.86473	2.8917	3.01058	3.34006	2.75405	3.80781	2.51476	3.53928	4.58868	2.87158	2.72563	3.00669	2.36938	3.16279	2.67624	2.69282	2.77787	2.72753	2.91326	2.92955
GTF3C2-AS1	3.29017	3.30951	3.35591	3.71085	3.76737	3.42668	3.3158	3.39371	3.11003	3.45351	3.40537	3.04915	3.39229	3.52068	3.08174	3.49236	3.83513	3.44451	3.08741	3.19875	3.14178	3.47673	3.57478	3.46687	3.05407	3.57685	3.38121	3.37494	3.10465	3.22354	3.40021	3.72287	3.3015	3.39789	3.36181	3.28242	3.53714	3.12849	3.98209	3.18928	3.44457	3.21153
RPPH1	3.79409	3.8847	4.20803	3.83934	4.24458	3.28356	3.77795	3.75234	4.01088	3.79654	3.68075	3.8885	3.9207	4.05974	3.66359	3.49295	3.86724	3.74402	4.08916	3.68318	3.66637	4.12786	3.8807	3.8372	3.64409	3.71046	3.89773	4.42108	4.60108	4.05362	3.76572	3.93029	4.45742	3.95074	4.96219	4.13469	4.06563	3.95837	4.145	3.94276	3.95343	4.17445
LINC02175	4.15018	4.09515	4.07424	3.99789	4.37076	3.96259	4.04158	3.98186	4.26403	4.34574	4.24229	4.00408	4.08484	4.02308	3.82036	4.24379	4.21715	3.98898	4.37401	3.88907	4.2359	4.43972	3.86401	3.86913	3.66548	3.91145	4.06726	4.13043	3.72016	3.81879	4.00002	4.18877	4.31729	4.1824	4.41829	4.29445	3.69844	3.97346	4.0521	4.11652	4.49963	4.18273
FAM216B	2.32017	2.11781	2.2084	2.32407	2.57422	2.13526	2.23779	2.2339	2.56842	2.31739	2.47782	1.97049	2.50296	2.39677	2.28157	2.27735	2.23669	2.2626	2.51416	2.46917	2.11582	2.40336	2.5673	2.27653	2.32482	2.25165	2.19261	2.32111	2.24625	2.42766	2.1142	2.45216	2.37327	2.24953	2.40647	2.46452	2.44992	2.31815	2.54122	2.26527	2.45335	2.22349
C20orf203	5.30328	5.76051	6.1373	5.79215	5.8473	5.40061	5.63149	5.45751	5.65941	6.04484	5.59571	5.10118	5.60023	5.55389	5.514	5.76899	5.53063	5.53476	5.76754	5.69053	5.40222	5.83392	5.7134	5.98309	5.30623	6.04727	5.56235	5.54171	5.18184	5.57084	5.36954	5.61534	6.01098	5.52625	5.80792	5.87675	5.51773	5.74818	5.92925	5.32868	5.82523	5.49143
PRCD	4.58293	4.29174	4.72985	5.07141	5.08695	4.67927	4.46366	5.04413	4.66455	5.09125	4.72996	4.62153	4.77569	4.65383	4.18347	5.14039	4.77232	4.5499	4.75153	4.54185	4.62747	4.96557	4.89457	4.57259	4.40565	4.75172	4.55481	4.67594	4.67663	4.6515	4.34701	4.59117	4.89029	4.78252	4.55475	4.41774	4.80266	4.77615	4.72774	4.62781	4.57827	4.99223
SCOC-AS1	2.73817	2.6421	2.46442	2.76844	2.77816	2.86559	2.50834	2.82729	2.78135	2.58802	2.6527	2.47312	2.46114	2.88927	2.46617	2.77568	2.8858	2.56757	2.43503	2.51963	2.75684	2.53407	2.60228	2.55957	2.34551	2.49443	2.64928	2.3851	2.58206	2.50834	2.61693	2.59796	3.04671	2.69098	2.483	2.73852	2.34276	2.60589	2.63113	2.56431	2.80388	2.53837
LINC00671	3.57471	3.71361	3.7448	4.05344	4.00385	3.55932	3.70603	3.75835	3.64724	3.56422	4.04873	3.60697	3.82257	3.95404	3.4382	4.18915	3.94783	3.63517	3.8928	3.89399	3.32872	4.05703	4.09804	3.52999	3.38298	4.02548	3.57183	3.50818	3.63797	3.64897	3.44095	3.81389	3.7559	3.67571	3.44425	3.32938	4.2052	3.69335	4.3101	3.59712	4.04446	3.64839
EGFLAM-AS2	3.41212	3.68137	3.6787	3.5675	3.47765	3.4018	3.91848	3.53127	3.56756	3.81486	3.47065	3.33339	3.50007	3.48275	3.52914	3.49429	3.88696	3.42098	3.65335	3.4018	3.53181	3.56884	3.70235	3.73014	3.46579	3.55648	3.40292	3.37721	3.31696	3.2697	3.52657	3.36569	3.70806	3.31636	3.90343	3.46458	3.67557	3.52218	3.2724	3.47029	3.53722	3.32653
LOC101928343	5.14254	5.02501	5.10084	5.29222	5.53031	5.1469	4.96494	5.30554	5.08988	5.22688	5.67618	4.99632	5.16212	5.5597	4.99735	5.10892	5.22655	5.1759	5.36986	5.31958	5.05925	5.2523	5.79539	5.16907	5.11278	5.66443	5.18318	5.07883	5.00358	5.33605	5.03674	5.50522	5.14455	5.16876	5.20759	5.02368	5.44119	5.0619	5.49345	4.532	4.94237	5.12193
LINC00856	3.03068	2.8786	2.98063	3.43008	3.02526	2.83223	2.65177	3.12003	2.7705	3.06052	2.97165	3.07592	3.25335	2.92226	2.91205	3.01669	2.99276	3.02712	3.08438	2.9428	2.88551	3.04027	3.13304	2.8535	2.72155	3.05221	3.05334	3.03482	2.82736	3.02669	2.8959	2.97148	3.07294	2.9856	3.31353	3.16164	2.97897	3.0689	3.50286	2.84125	3.18891	2.75641
LINC00930	3.93699	4.05145	3.65844	4.41359	4.55137	4.2376	3.96259	4.30856	3.91555	3.96471	4.41403	4.01396	4.4278	3.84566	4.2734	4.33769	4.4711	4.06142	3.92376	4.01963	4.36741	4.4356	4.31794	4.19173	3.9492	4.466	3.92813	4.1012	3.85506	4.45658	4.01379	4.1537	4.07309	4.16732	4.56508	4.28933	4.24532	4.5118	4.49698	4.04022	4.38608	3.9544
LOC105371967	2.08767	3.9773	2.41071	2.30142	2.67677	2.25317	2.28575	2.38407	2.42577	2.5337	2.23679	2.6271	2.30895	2.30101	2.1195	2.68427	2.34488	2.2036	2.36065	2.50377	2.41148	2.48204	2.58282	3.31118	3.06338	2.44168	2.4155	2.22473	2.52973	2.2631	2.02053	2.42044	2.75901	2.303	2.38198	2.32202	2.45395	2.83905	3.34008	2.36697	2.90867	2.34193
CNTFR-AS1	2.79806	2.72138	2.85776	3.07976	3.06361	2.70929	2.80567	2.9662	2.95232	3.00602	2.63116	2.71046	2.69203	2.72028	2.68702	2.91755	2.64187	2.58725	2.72762	2.81858	2.84217	3.24919	3.11448	2.84351	2.77369	2.78977	2.65968	2.71957	2.44778	2.73001	2.54887	2.99453	2.97543	2.73477	2.92645	2.88316	2.78907	2.76549	2.91286	2.67494	2.98594	2.6355
KRBOX1-AS1	2.8577	2.61499	2.58943	2.87618	3.23813	2.32463	2.2817	2.56888	2.31304	2.75901	2.84733	2.3	2.72348	2.9013	2.50614	2.52992	2.68066	2.44799	2.35232	2.51816	2.44468	2.42582	2.88017	2.64385	2.41752	2.85208	2.40555	2.45453	2.61215	2.76658	2.16918	2.59402	2.7159	2.39189	2.97397	2.8577	2.92361	2.83309	3.02245	2.41975	2.91843	2.47498
RNF144A-AS1	4.92042	4.03258	4.56254	4.80011	5.68719	4.61701	4.91653	5.20646	4.60422	4.75573	4.91894	4.72401	5.38643	5.65481	4.24505	4.79432	5.04547	5.22136	4.79498	4.62353	4.88142	5.28018	6.25124	4.65402	4.76658	5.75976	4.72843	5.02546	4.71059	4.75907	4.87884	4.88581	5.69165	4.06446	4.99751	4.92507	4.34667	4.74319	5.55174	4.50376	5.26869	4.88301
DLEU2	5.0962	6.28804	5.59175	7.43595	3.38877	7.17037	5.88313	4.71789	5.78239	5.99259	6.65174	4.46879	6.81193	7.89266	6.15627	5.19143	5.10149	6.02174	4.25734	4.64692	5.97195	5.58984	5.45608	5.79051	6.31333	7.72175	4.91091	6.42665	8.01658	6.02909	6.48691	5.67409	8.0849	6.81748	7.91776	8.17245	6.34754	7.20273	7.03678	6.12178	6.87802	7.1835
LPP-AS2	2.54229	2.33413	2.49467	2.44252	2.21743	2.31888	2.55392	2.42144	2.46378	2.48988	2.69723	2.42506	2.42441	2.39144	2.26966	2.57326	2.44599	2.33879	2.387	2.42478	2.50188	2.76078	2.32855	2.52485	2.29799	2.33416	2.37163	2.43981	2.34608	2.12785	2.52714	2.74478	2.41301	2.30472	2.15512	2.47908	2.48982	2.36105	2.40944	2.27476	2.48867	2.30725
TIPARP-AS1	3.34698	3.18245	3.17337	3.25315	3.36342	3.19167	2.98623	3.35268	2.89599	3.31123	3.35533	3.24455	3.56406	3.3005	3.13872	3.21748	3.19978	3.16631	3.15485	3.13729	3.25506	3.35762	3.20739	3.31918	3.04775	3.39772	3.25128	3.25149	3.14997	2.99881	3.14509	3.08166	3.47029	3.22203	3.36447	3.00201	3.29307	3.32082	3.44962	3.00707	3.34597	3.10751
LOC101927314	1.98486	2.03539	1.89688	1.9949	2.13911	2.07698	2.24622	2.25141	2.04923	2.24439	2.05758	2.01107	2.27241	2.04673	1.99658	2.00165	2.0399	1.90265	2.15469	2.05732	1.93146	1.98868	2.09675	1.91364	1.90069	2.17408	2.05987	1.99362	1.95661	2.24354	1.98401	2.07318	1.91969	2.07206	2.13406	2.08628	2.09577	1.93767	2.01559	2.28974	2.08749	1.99985
DSG2-AS1	3.45676	3.64091	3.3097	3.69627	3.90004	3.38599	3.47083	4.14401	3.76188	3.54985	3.64766	3.62562	3.62706	3.65568	3.63756	3.70084	3.83658	3.52271	3.66805	3.53928	3.57455	3.5874	3.57441	3.58353	3.59528	3.84432	3.52101	3.42841	3.61057	3.48693	3.46558	3.63546	3.60285	3.60425	3.59162	3.73179	3.58002	3.32985	3.98172	3.48965	3.5993	3.86668
ALDH1L2	2.73357	3.23436	3.00452	2.96476	3.31364	2.96769	2.88714	2.78822	2.94571	3.02539	2.79088	3.12233	3.02975	2.88803	3.06941	2.92795	3.19525	3.14383	3.19581	3.2064	2.95597	2.85682	2.92945	2.82078	3.16274	3.03531	2.88812	2.95005	2.7947	3.06716	2.87089	2.93783	3.13197	2.87155	2.98374	3.08465	3.10103	2.81382	3.28275	2.95267	3.09132	2.86835
LOC100132078	2.44496	2.59447	2.27716	2.59367	2.88071	2.54957	2.63705	2.56123	2.81777	2.72552	2.68041	2.46612	2.51798	2.69434	2.81234	2.70542	2.69315	2.60392	2.32868	2.35313	2.25842	2.35315	2.79884	2.72517	2.57263	2.40806	2.44654	2.44689	2.73723	2.48229	2.5992	2.73878	2.44024	2.48222	2.53057	2.65199	2.53006	2.51886	2.70288	2.3822	2.43444	2.92751
ATP11A-AS1	3.41818	3.42627	3.17095	3.52918	4.05661	3.17143	3.12089	3.65747	3.31284	3.24781	4.02783	3.33713	3.36949	3.31278	3.13439	3.70084	3.55649	3.10441	3.05622	3.36862	3.21861	3.58046	4.28759	3.45246	3.21422	3.57254	3.48813	3.41125	3.28783	3.22264	3.22446	3.43284	3.6764	3.12601	3.61714	3.48337	3.6277	3.21866	3.58653	2.99147	3.47597	3.0361
TPTE2P2	2.07441	2.02527	1.93942	2.58585	2.01127	2.1247	2.14793	1.9316	2.13689	2.2014	2.19319	2.062	2.2141	2.08114	1.89044	2.19114	2.04156	2.08495	2.16543	2.10104	2.1323	2.15659	2.03379	1.90149	2.07441	2.27745	2.0999	2.16555	1.97576	1.94137	2.07551	2.25945	2.20444	2.06527	2.02625	2.02039	2.10495	2.09561	2.25895	2.16062	1.9369	1.96533
ARHGEF33	2.26803	2.64106	2.5284	2.7036	2.39817	2.16141	2.3895	2.41711	2.33368	2.52918	2.46438	2.34574	2.62609	2.44917	2.27064	2.41627	2.39563	2.44385	2.55574	2.27501	2.39164	2.71845	2.53254	2.21639	2.2809	2.33759	2.49163	2.51845	2.38935	2.16422	2.23093	2.11823	2.38554	2.27146	2.19109	2.38172	2.54338	2.38821	2.46561	2.32752	2.49151	2.29981
LINC00558	1.97307	1.94435	1.92078	1.99474	2.10388	2.10527	2.21878	2.02887	2.01672	2.03633	2.09138	2.27828	2.07973	2.02608	2.15537	2.24842	1.94273	2.21596	2.01361	2.16555	2.11137	1.99413	2.35652	2.069	2.02887	2.02731	1.92979	2.16633	2.03723	2.00083	2.00088	1.91477	1.95926	1.96675	2.02253	2.08628	1.95728	1.95627	2.07307	2.10445	1.84167	2.01927
NPHP3-AS1	2.69206	2.92113	2.78939	3.00872	3.17902	2.54873	2.5964	2.75169	3.19977	2.64805	3.2707	2.84219	2.96582	2.85497	2.72527	3.19328	3.02793	2.93754	2.7409	2.60072	2.71693	3.06996	3.0865	2.6462	2.55697	2.74229	2.85484	2.79992	2.86049	2.89541	2.6617	3.27609	2.91911	2.67732	3.0484	2.91984	2.54894	2.77192	2.89669	2.80706	2.80911	2.7235
LINC01270	2.88093	3.54239	2.87914	2.86536	2.96048	3.01905	2.86536	2.82102	2.76329	2.81623	2.69108	2.76292	3.01248	3.06596	2.73024	3.14069	3.1857	2.86084	2.84767	2.67672	2.60985	3.01644	3.07935	3.04708	2.67505	2.96543	2.99543	2.92819	2.86777	2.85141	2.89764	2.91121	2.92238	3.09041	2.5532	2.6866	2.74173	2.76104	2.72866	2.81756	2.815	2.79021
PRMT5-AS1	2.95055	3.21037	3.14325	3.1599	3.50251	2.87195	2.83925	3.18482	2.89126	3.32223	2.95403	3.09019	3.10367	2.97357	3.19027	3.15149	3.41818	2.82736	3.20192	3.16284	2.92236	3.48127	3.41197	3.10347	2.98709	3.41226	3.09943	3.23597	3.0707	3.1337	3.00331	2.74288	3.00923	2.72806	3.23027	3.06153	3.0669	2.9389	3.17856	3.19189	3.12129	3.14495
APCDD1L-DT	5.83158	5.96661	5.84461	6.19812	6.0375	5.63005	5.78677	6.0908	5.82604	5.86299	6.0857	5.9324	5.99814	6.02078	5.696	5.96716	6.00333	5.86694	5.76219	5.9185	5.74007	6.17514	6.33534	5.95479	5.52636	5.50953	5.91495	5.92292	5.90213	5.73666	5.63762	6.09238	5.98819	5.7706	5.79521	5.62887	5.90152	5.86168	5.97228	5.75541	5.93489	5.83736
LOC101928335	2.53235	2.66599	2.4938	2.62859	2.96256	2.45654	2.87682	2.63281	2.44427	2.6959	2.67549	2.37855	2.78187	2.66056	2.67826	2.9423	2.78887	2.81932	2.56882	2.56955	2.47314	2.55999	3.01726	2.73539	2.39222	3.10571	2.3706	2.53467	2.4902	2.65511	2.61693	2.48165	2.79689	2.59838	2.70077	2.65828	2.69359	2.52444	2.91807	2.47386	2.91176	2.87705
ZNF474	2.72118	2.64697	2.93928	3.06307	3.11962	3.02505	3.18091	3.0527	3.30092	2.7742	2.99172	3.13266	3.10428	3.51283	3.06973	3.22682	3.1645	3.02142	3.00358	2.89752	2.90065	2.76118	3.20493	3.02725	3.14022	3.11754	3.02365	2.7184	3.19489	3.10039	2.89119	3.17724	3.49716	3.00976	2.64608	2.72504	3.13028	2.93255	3.34403	3.06419	3.00203	2.94037
LINC01898	3.76582	4.13481	3.92091	3.66089	4.42442	3.77169	4.14317	3.97995	3.65904	3.67727	3.87356	3.73349	4.03686	3.7788	4.07985	4.14777	3.91704	3.63638	4.0102	3.70654	3.78573	3.7035	3.8977	3.72907	3.76276	3.77341	3.6989	3.65505	3.86456	3.76024	3.48381	3.67859	3.70531	3.9286	3.93798	4.09585	3.73238	4.01633	4.00727	3.41683	3.89586	3.71789
ALMS1-IT1	2.55284	2.93163	2.84047	2.74672	2.44794	2.49351	2.56857	2.57741	2.77757	2.70697	2.73555	3.30788	2.67655	2.78114	2.98878	2.43997	2.70697	2.54361	2.55475	2.4157	3.20883	2.71367	2.66338	2.49405	3.1653	2.30436	2.61443	2.25066	2.44751	2.38299	2.61233	2.46766	2.53757	2.56713	2.55126	2.70962	2.55063	2.72239	2.48361	2.73234	2.72307	2.55586
LINC01838	3.43155	3.30832	3.33244	3.48134	4.39272	3.21642	2.79829	3.48315	2.96921	3.33285	3.45476	3.19459	3.575	3.2564	3.25987	3.42437	3.62469	3.27306	3.31027	3.19126	2.89563	3.29153	3.89309	3.35249	3.12924	3.40819	3.4803	3.23639	3.20596	3.2564	3.00762	3.36917	3.64455	3.24841	3.55456	3.32938	3.11249	3.43656	3.78357	3.26752	3.65329	3.19331
LEPR	3.27057	3.04765	2.68481	3.35583	3.3066	2.9368	2.57872	3.05888	3.45847	2.94172	3.50886	3.17599	3.18815	3.52069	2.92646	3.29251	3.26622	3.24308	2.73065	3.23323	2.78907	3.63879	3.21711	3.23193	2.99737	3.45042	3.42167	3.29146	3.23541	2.84613	2.77752	3.10223	3.45815	3.35559	3.28996	3.23749	3.19359	3.21629	4.08312	3.17296	3.13463	3.49332
LRRC77P	2.36646	2.35568	2.50379	2.93732	2.7447	2.62385	2.36717	2.54424	2.41449	2.51352	2.86408	2.32842	2.55091	2.50456	2.45496	2.78272	2.6621	2.68213	3.31184	2.45943	2.53862	2.67017	2.97067	2.73647	2.45184	2.49116	2.46897	2.32098	2.73257	2.37113	2.39555	5.55604	2.52197	2.51673	2.54239	2.96427	2.55944	2.31012	3.30743	2.46697	2.60177	2.56326
LOC101927138	2.27357	2.33068	2.43587	2.42609	2.32973	2.42509	2.32906	2.38247	2.17186	2.67192	2.41322	2.51088	2.45346	2.76756	2.42005	2.72377	2.41695	2.49838	2.5876	2.45699	2.42341	2.54915	2.77438	2.37401	2.41695	2.42839	2.28152	2.32254	2.4261	2.52425	2.14682	2.42555	2.51428	2.61832	2.50061	2.44192	2.67628	2.24964	2.46023	2.50672	2.38515	2.48997
CFLAR-AS1	2.92333	3.07879	2.86009	3.09759	2.90462	2.78173	2.68723	2.83709	2.88527	2.94632	3.00347	2.96286	2.88537	2.87497	2.85655	3.04579	2.86206	2.8748	3.01874	3.06447	3.09134	2.72948	2.90237	2.82464	3.10914	2.81365	2.86206	2.78021	2.79327	2.77258	2.70698	2.6725	2.8851	2.77002	2.93574	2.88052	3.13279	3.13601	2.83109	2.88308	3.07717	2.72755
CDC42-IT1	2.88378	2.71948	2.70849	3.98195	2.73974	3.19595	2.87486	2.82862	2.64919	3.12553	2.76969	2.57098	3.39215	3.29746	2.95468	2.70267	2.89171	2.68507	2.55574	2.90598	2.81121	2.95862	3.02094	2.58633	3.28325	2.82164	2.94885	2.75967	2.91481	2.91344	3.18649	2.91678	3.90374	3.54249	3.55658	2.97194	3.13028	3.24108	3.77051	2.89141	3.31929	3.52433
CASC22	2.54056	2.29881	2.30801	2.1499	2.34241	2.49683	2.27462	2.17783	2.66939	2.49557	2.19657	2.32855	2.50942	2.27394	2.12423	2.36771	2.37024	2.42098	2.38973	2.34185	2.34413	2.50046	2.71595	2.26161	2.26161	2.05146	2.23316	2.4411	2.49053	2.1112	2.30071	2.62046	2.20933	2.35664	2.23598	2.25964	2.70654	2.28264	2.15217	2.19353	2.34246	2.26479
KCP	3.86922	3.90884	3.61715	4.13948	4.26822	3.57803	3.80071	3.99844	3.69861	3.70821	4.09666	3.59144	4.0061	4.25283	3.77695	4.04216	3.77151	3.87086	4.12668	3.72537	3.854	3.74854	4.18713	3.90613	3.65455	4.11678	3.61566	3.78827	3.8651	4.11589	3.76211	3.78769	3.8922	3.77667	3.91619	3.77845	4.32118	3.96456	3.99072	3.44232	4.12253	3.69027
ANHX	5.76564	6.00911	5.87813	6.03754	6.37088	6.20169	5.9042	6.13159	6.02565	5.97212	6.44589	6.0911	6.06248	6.12134	5.98102	6.1225	6.13189	5.71298	6.03759	6.11072	5.97056	6.10276	6.10932	6.2528	6.0635	6.40433	5.96982	5.83664	6.07385	6.03968	5.84453	5.99172	6.08384	6.06289	6.23946	6.02551	6.38558	6.02939	6.24415	5.8146	6.08439	5.98817
OR2H1	3.77525	3.54068	3.34974	3.73491	3.84641	3.18194	3.61165	3.63412	3.78106	3.65485	4.08851	3.23475	3.46853	3.87338	3.63638	3.68856	3.75723	3.77355	4.09126	3.60606	3.36079	3.61049	3.93157	3.43687	3.49105	3.35337	3.69578	3.60572	3.55073	3.43887	3.4591	3.69132	3.53377	3.691	3.58932	3.58001	3.40752	3.63883	3.87157	3.44208	3.388	3.72609
ESPNL	5.43276	5.50505	5.48634	5.65869	5.74349	5.33362	5.25894	5.70967	5.73792	5.21267	5.79927	5.45067	5.43477	5.62736	5.32318	5.85433	5.60996	5.33362	5.58974	5.84951	5.33362	5.73666	6.04634	5.59254	5.69453	5.56489	5.82289	5.21636	5.52967	5.31367	5.26401	5.93669	5.259	4.87044	5.59757	5.57844	5.55366	5.34449	5.68945	5.39972	5.4625	5.3482
TTC23L	2.79012	2.98286	3.36238	3.34151	3.28278	3.13511	2.91668	3.36853	3.10972	3.08089	3.40043	3.05293	3.07683	2.9403	3.03516	3.42685	2.9982	3.03516	3.10739	2.99955	3.17617	3.10731	3.22929	3.05221	2.9561	2.87109	3.24631	2.88846	2.92184	2.89325	3.05539	3.04753	3.18829	3.29386	3.07656	3.06377	2.80516	2.913	3.06775	2.77032	3.25226	2.94703
LINC02028	2.82335	2.74633	2.77403	2.60838	3.08201	2.84623	2.80567	3.01947	3.1134	2.69727	2.8855	2.93858	2.74125	3.12274	2.84466	2.78204	2.85478	2.79876	3.2501	2.72477	2.76401	2.7517	3.03637	2.71012	2.7519	2.84801	2.70751	2.62487	2.74395	2.71364	2.92297	3.0839	2.75142	2.85747	2.4898	3.09398	3.11632	2.87513	2.85639	2.80062	3.12129	2.90173
LINC02239	3.97969	3.86569	3.8305	4.08345	3.82771	3.75098	3.76068	3.70396	3.97043	3.68322	3.87738	3.57518	4.06777	4.3262	3.72919	3.79659	3.52521	3.6728	3.57767	3.42255	3.99347	3.51829	3.9596	3.93767	3.66928	4.01239	3.73943	3.70283	3.93057	3.90333	3.77537	3.61712	3.78298	3.78904	3.45734	3.52641	4.00303	3.63372	3.80181	3.61564	3.94867	3.93955
FAM201A	2.82953	3.96419	2.78608	2.23488	2.31453	2.42811	3.40913	2.0678	2.27969	3.14707	2.84731	2.21487	2.18197	2.87402	3.6374	2.50121	2.93405	2.72444	2.07666	2.65609	4.82905	3.02807	2.25767	2.62004	2.40414	2.42186	2.58706	3.16024	2.89126	2.45384	2.74641	3.28133	2.63941	2.95649	2.47626	2.6785	2.47654	2.41214	2.22221	2.75734	2.66179	2.24562
LEXM	2.90251	2.9523	2.71105	2.9403	3.20961	2.814	2.70346	3.40947	3.08867	2.82835	2.96925	2.79598	2.83213	3.02886	2.91765	3.02886	3.18704	3.16579	2.41617	2.66157	2.8798	2.67165	3.35399	2.81814	2.60191	2.87118	3.05012	2.71935	2.75986	2.96181	2.454	2.90666	3.12069	2.84109	2.8477	2.85646	2.70527	2.86475	2.9236	2.59255	2.8186	2.91369
LINC01990	1.95589	2.17116	2.12502	2.41386	2.19186	2.06332	2.14821	2.29032	2.16128	2.17484	2.07238	2.1396	2.02142	2.40949	1.99535	2.11772	2.39776	2.03335	2.13985	2.19896	2.12913	2.27889	2.16766	2.24046	2.16869	2.03512	2.22828	2.29154	2.28991	2.07215	2.07068	2.26024	2.15981	2.06527	2.4561	2.2222	2.26352	2.19188	2.23919	2.41873	2.26987	2.23002
LOC100507250	2.79638	2.65501	2.93991	2.79166	3.0458	2.6469	2.95661	2.99181	2.52622	2.56408	2.55489	2.57136	2.64042	2.69606	2.56861	2.63595	2.84192	2.29244	2.64609	2.54985	2.85422	2.56642	2.5958	2.81359	2.50981	2.79781	2.64174	2.51892	2.3776	2.5689	2.58745	2.62386	2.70937	2.38576	2.65562	2.63399	2.82728	2.50218	2.72758	2.69089	3.04852	2.74794
MIR4300HG	3.74126	3.76556	4.03474	3.6363	4.25477	3.49941	3.55537	4.41429	3.73925	3.9745	3.92859	3.73906	4.14909	4.0999	3.7764	4.16115	4.13797	3.78815	3.87629	3.87937	3.70023	4.24675	4.61483	3.90118	3.46146	3.73841	3.75648	3.75153	3.662	3.66377	3.7764	3.98613	4.07819	3.85343	3.88562	3.87025	3.59939	3.7997	4.00879	3.77284	3.75772	3.76668
LOC101927787	3.09151	3.02291	3.26695	3.25833	3.43365	2.69059	3.06139	3.00892	2.97061	3.11381	3.54277	2.73038	3.21522	3.0908	2.92615	2.86911	3.02957	2.91129	3.0155	2.98862	2.64244	2.94604	3.21048	2.8851	2.79068	3.01688	3.16577	2.82175	2.86286	2.89281	2.67345	2.8676	2.92048	3.18112	3.29791	3.02935	3.29014	2.68401	3.22951	2.71011	3.19553	3.16883
HMMR-AS1	2.24895	2.61018	2.47569	2.62859	2.27125	2.53137	2.38362	2.42149	2.3209	2.297	2.45699	2.38389	2.52524	2.46337	2.51677	2.40018	2.5918	2.48485	2.41635	2.65357	2.58769	2.45663	2.38334	2.25576	2.52968	2.56856	2.5509	2.63846	2.7468	2.46892	2.55818	2.49514	2.72563	2.63858	2.51845	2.89008	2.07555	2.45943	2.44382	2.69513	2.43166	2.6367
UBAC2-AS1	3.88442	6.26893	4.35978	4.45865	4.69412	4.53298	4.04076	4.52418	4.42088	3.89671	4.74181	4.34418	4.36214	4.0554	3.96055	4.29972	4.49747	4.12857	4.31356	4.26332	4.89512	4.08134	4.89262	4.6077	4.26575	3.81092	4.507	3.95034	4.73382	4.05394	4.88194	4.05361	4.61233	3.923	4.37121	3.97074	4.05812	5.14615	4.41347	4.20518	4.32411	4.2266
HOTAIRM1	4.28778	3.98413	4.65274	4.08576	5.05862	4.469	4.25499	4.14977	4.52516	4.00936	5.39562	6.44925	4.30264	4.61448	4.64336	4.09509	4.61707	4.73133	4.0478	4.39679	4.80216	5.31478	5.86922	4.23385	4.62392	5.42333	4.4403	3.98714	4.36329	4.7393	4.79678	4.48157	3.90972	5.20565	6.58677	5.13507	5.06199	4.92593	5.4035	4.35828	3.89234	5.32584
LINC01128	5.99036	6.02104	6.11762	6.11184	6.15527	6.37398	6.04667	6.61031	5.75959	6.59432	6.02947	6.24206	6.16304	5.77079	7.18876	6.86086	5.79041	6.17775	6.79244	6.1044	5.64121	6.10434	6.07577	6.44207	6.67654	6.86422	6.95502	6.12767	5.41066	5.52204	6.59788	5.9453	5.87126	6.50169	5.44787	5.22556	6.16888	6.01149	6.11755	5.90616	6.71199	6.61808
C5orf47	2.79418	2.79165	2.82102	2.94504	3.24167	2.59935	2.466	2.80405	2.81287	2.73386	2.75122	2.86265	2.74121	2.83972	2.97537	2.66524	2.73525	2.71197	2.82093	2.55881	2.61972	2.81971	3.08212	2.9761	2.73815	2.84461	2.87557	2.654	2.68786	2.76379	2.9568	2.78554	2.95335	2.78125	2.7829	2.93894	2.88384	2.87396	2.79906	2.50244	3.04417	2.5918
OVAAL	2.78956	2.8562	2.71067	2.88435	2.7936	2.72966	2.52947	2.66638	2.83805	2.99074	2.65481	2.8613	2.70959	2.77038	2.76618	2.91599	3.04346	2.57882	2.58838	2.86287	2.64275	2.85872	3.14206	2.61377	2.78385	3.20717	2.84836	3.00648	2.79022	2.60018	2.78744	3.09525	3.23806	3.11031	3.06967	3.12304	2.7775	2.70799	3.46113	2.63455	2.9198	2.94607
LOC100505782	2.55787	2.37404	2.62515	3.47147	2.70841	2.85785	2.61494	2.69309	2.6423	2.458	2.65045	2.47998	2.48807	2.47972	2.41949	2.37261	2.59871	2.18115	2.63346	2.44173	2.511	2.49515	2.35737	2.39747	2.26445	2.41828	2.54263	2.62769	2.71031	2.58246	2.53296	2.93993	2.48159	2.46637	2.29359	2.56071	3.35171	2.53871	2.5182	2.48807	2.50061	2.49461
TFAP2A-AS1	4.51901	4.69878	5.19368	4.89351	5.25161	4.54075	4.91859	4.85939	4.81944	5.01301	4.95676	4.78913	5.48005	4.81715	4.93639	5.00736	5.25905	4.6606	5.123	4.73236	4.54957	5.1668	5.27613	4.79278	4.71044	5.03372	4.79493	4.66857	5.26446	5.12844	4.33524	5.10757	5.14398	4.97099	5.1543	5.29335	5.27346	4.60236	5.12099	4.69279	4.86726	5.12099
TTBK2	3.99327	4.37612	3.90623	3.98634	3.4807	4.61345	4.42689	3.86576	3.45932	4.08387	3.8684	4.44629	4.387	3.69429	4.04147	4.25453	3.51768	3.80212	3.66928	4.38647	4.84478	4.30788	3.80893	3.99586	4.42776	5.02439	3.93231	4.2564	4.28461	4.13894	4.92589	4.19628	3.85309	4.55986	4.52907	3.85858	4.67972	4.12548	3.17851	4.19983	3.35544	3.67564
OOSP2	2.12242	2.33737	2.27656	2.31489	2.3628	2.26969	2.35313	2.41899	2.13078	2.32298	2.54043	2.27337	2.55611	2.31841	2.18971	2.54812	2.66469	2.46912	2.68248	2.34458	2.22498	2.45716	2.51141	2.17248	1.95171	2.60597	2.34439	2.26988	2.20531	2.21871	2.1908	2.54203	2.25217	2.26155	2.29532	2.33405	2.3982	2.04084	2.40945	2.36443	2.20063	2.32828
MAMSTR	3.5644	3.43791	3.48817	3.96875	3.68838	3.92538	3.6159	3.72542	3.55959	3.88797	4.17082	3.79494	3.71334	3.88961	3.88778	3.97408	3.92353	3.75959	3.96476	3.71537	3.6035	3.75196	3.73495	3.82315	3.55099	4.26061	3.31695	3.77866	3.75647	3.49759	3.84257	3.94116	4.04146	3.85366	4.23031	4.11536	3.40304	4.2906	4.16636	3.64457	4.16727	3.78918
HAR1A	3.09066	3.33266	3.30148	3.21908	3.72027	3.17432	3.48324	3.37657	3.40624	4.48598	4.70187	2.67791	3.0352	5.08534	3.18254	4.73629	3.43789	3.19006	2.83041	2.9564	3.05972	3.51829	3.82399	3.08399	2.96616	3.50031	3.97628	3.62871	3.30303	5.21051	3.45673	3.20423	3.74757	3.40643	3.78848	3.33197	3.42807	3.75998	3.16557	3.41171	4.37685	5.09285
LMTK3	3.03972	3.33158	2.95099	3.69077	3.59019	3.11899	3.10535	2.75772	2.58692	3.21108	3.52619	2.85981	3.02941	3.0844	2.81445	3.18083	2.90485	2.5313	2.949	2.74892	3.48545	2.80976	3.78382	3.64954	3.33713	3.2682	3.32991	3.65246	4.15286	3.44092	3.13543	2.92973	3.7987	3.19607	3.30843	2.96943	3.49406	3.88855	4.11118	2.82045	3.702	4.10387
ZSCAN30	5.09745	4.69398	4.96154	4.91321	5.59033	4.85295	4.81237	5.09378	4.83649	5.15869	5.38779	4.94215	5.04488	4.7795	5.15584	5.29707	5.10632	5.02055	4.82851	4.83649	4.98563	5.44855	5.22302	5.10424	4.65794	5.02055	4.88876	4.80761	4.71377	5.01984	4.60754	5.09307	5.2029	4.89242	5.1872	5.01315	4.78757	4.83957	5.42087	4.79679	5.1187	5.25072
SLC26A4-AS1	2.1804	2.19563	2.08563	2.20459	2.119	2.07698	2.31111	2.24275	2.25783	2.25637	2.45699	2.346	2.27097	2.04442	2.01451	2.61065	2.25576	2.23038	2.38953	2.04785	1.93097	2.31303	2.35597	2.28483	2.00746	2.21323	2.39081	1.91267	2.15581	2.43688	2.01451	2.25542	2.14609	2.33405	2.30406	2.19942	2.05501	2.23473	1.9994	2.01406	2.21142	2.23033
ZNF561-AS1	4.99098	5.09398	4.56713	5.2574	5.23749	4.62535	4.38112	4.78324	4.76399	4.70361	4.9278	5.03889	4.89683	4.98781	4.81146	5.26118	4.97531	4.79425	4.95597	5.29682	4.95716	4.82693	5.14504	4.8464	4.80638	5.11242	4.8639	4.85928	4.45147	4.86485	4.75884	5.09644	4.90091	4.83617	5.13514	4.79613	4.5015	4.82984	5.01114	4.76812	4.93234	4.62513
INTS6-AS1	3.18196	3.16579	3.27721	3.26289	3.45387	3.06282	3.18368	3.36631	3.18704	3.24459	3.30988	3.19791	3.09608	3.0701	3.17037	3.18704	2.84461	3.12455	3.22586	3.19424	3.30737	3.26594	3.50103	3.14661	3.12917	3.01041	3.10656	3.33652	3.67539	3.15025	3.23525	3.29795	3.13028	3.44331	3.11158	3.24407	3.54986	3.12744	3.07314	3.11843	3.21443	3.16948
ZNF575	4.70955	4.37971	4.58809	5.07612	4.82565	4.70536	5.25285	5.04092	5.07663	5.03729	5.08619	4.77412	4.86098	4.64996	5.12361	5.04403	5.79347	4.63183	5.09777	4.88247	5.69943	4.87307	5.27699	5.25028	4.61191	5.3851	5.0245	4.96628	5.07516	5.24142	4.975	5.07049	4.22829	5.44168	6.23337	4.5097	5.05029	5.13603	4.94603	5.15288	5.37056	5.42071
CHADL	3.49588	3.61506	3.76378	3.47842	3.96243	3.36248	4.01906	3.87235	3.47655	3.95804	4.09523	3.45567	3.45056	3.7426	3.4074	3.436	3.50424	3.52004	3.7044	3.47233	3.71018	3.18826	3.67799	3.3133	3.13936	3.64975	3.69539	3.49412	3.39662	3.61294	3.66166	3.47593	3.54301	3.43219	3.60615	3.29693	3.55835	3.48864	3.56855	3.43725	3.41966	3.31045
FAM111B	3.47791	3.83133	3.54096	3.62181	3.729	3.58193	3.5072	3.89837	3.55533	3.26134	4.03193	3.42192	3.52554	3.58534	3.64706	3.63297	3.73861	3.4823	4.20026	3.59429	3.8498	3.63349	4.03777	3.73337	3.38561	3.67031	2.8078	3.46723	3.90844	4.71858	4.07363	3.11582	3.79102	3.4469	3.73084	3.59894	3.60536	3.93563	3.65074	3.34337	3.476	3.63419
ZNRD2-AS1	3.10654	3.21911	3.35225	2.93649	3.81348	3.14616	2.96599	3.5676	2.986	3.13516	3.59685	3.02234	3.174	2.98973	2.98142	3.51104	3.55491	2.80348	3.04858	3.01851	3.25569	3.32891	3.51921	3.41468	3.10654	3.41577	3.04072	2.94389	3.03551	3.11972	3.15224	3.47394	3.53511	3.2438	2.94907	3.29484	3.44556	3.19424	3.30879	3.44987	3.44497	2.89836
LINC00632	2.023	2.24928	2.20032	2.32671	2.00828	1.92372	1.9282	2.02843	2.03427	2.03641	2.16831	2.00626	2.21747	2.37404	2.03643	2.46385	2.03001	2.14295	2.18601	2.1556	2.21868	1.93496	2.12818	2.04993	2.16766	2.25165	2.12762	2.05306	2.08051	2.03673	1.9851	1.92512	2.25489	1.99293	2.03167	1.92301	2.12901	2.09429	2.24995	1.97619	1.97075	2.24117
TMEM17	4.81182	5.56994	4.82433	4.47872	4.24251	4.62882	5.07914	5.04865	5.36326	4.2302	4.82413	4.57013	4.14909	4.89668	5.20191	3.90357	5.25407	4.94716	4.12166	4.76418	5.37952	5.13168	4.35094	4.32672	4.9432	3.75481	4.54448	4.91842	4.33437	5.80255	4.14466	5.34168	4.60492	3.75221	4.60259	5.25069	4.09295	4.68368	4.43404	6.07659	4.47695	4.40896
DDX11-AS1	2.24586	2.36892	2.03086	2.30594	2.37856	2.02596	2.12204	2.29647	2.01074	2.04169	2.24847	2.24473	2.33036	2.49361	2.68534	2.26028	2.16845	2.34004	2.60869	2.02451	2.00383	2.15151	2.20969	2.14791	2.24586	2.32292	2.31457	2.1601	2.09501	2.18239	2.22923	2.35072	2.08323	2.06979	2.0984	2.27418	2.15416	2.31012	2.3212	2.09247	2.23448	2.1851
SSTR5-AS1	3.13663	2.96801	2.73988	3.21333	3.53062	2.86665	3.12814	2.94538	3.04512	3.25941	4.17597	2.83169	4.52508	3.40254	3.69664	3.32773	3.38292	3.13036	5.51217	2.82185	2.82222	4.59433	3.37842	3.04325	4.02983	3.29449	5.39786	2.87581	3.31629	3.2201	2.6211	3.9016	3.07394	3.10897	3.272	3.15899	3.50834	3.60453	3.26211	2.72518	2.97343	3.20134
LOC101928837	3.53209	3.9326	3.67416	3.85445	3.69978	3.63627	4.06586	3.53919	3.89732	4.16222	4.59791	3.78318	3.15176	4.06871	3.43426	3.46596	3.62249	3.59091	4.02267	3.49632	3.79238	3.1442	3.76293	3.70981	3.62459	4.19448	3.90811	3.24411	3.82208	4.00418	3.92708	3.67447	3.49169	3.49919	3.72683	3.58776	3.4512	4.01105	3.78612	3.58984	4.15896	4.01105
FILNC1	2.35067	2.13062	2.51233	2.35089	2.43688	1.8736	2.23947	2.23643	1.98981	2.2287	2.20228	2.22312	2.1724	2.2287	2.28392	2.25576	2.22764	2.12787	2.32878	2.17392	2.08906	2.10054	2.42509	2.16777	1.93761	2.22355	2.07906	2.19243	1.98779	2.04698	2.10109	2.50568	2.02334	2.17083	2.15626	2.12247	2.17566	2.20086	2.24539	2.16593	2.18731	2.15194
C16orf92	3.86463	3.844	4.10872	3.89113	4.07191	3.67757	3.96656	3.7071	3.94875	3.932	3.7087	3.66381	3.94723	3.75236	3.56573	3.57616	3.64078	3.80997	3.60602	3.64345	3.89113	3.91091	4.16357	4.02652	3.53066	3.83845	3.77051	3.59549	3.95258	3.83683	3.55062	3.58303	4.12068	3.77712	3.84465	3.74134	3.80355	3.76855	3.64193	3.69189	3.86463	4.07752
PDCD4	2.24613	2.47651	2.1886	2.24746	2.38645	2.22511	2.32783	2.08688	2.56758	2.08682	2.25011	2.15606	2.53114	2.40874	2.71621	2.18413	2.67764	2.20539	2.12869	2.29179	2.30812	2.06008	2.21969	2.40064	2.13442	2.23691	2.16482	2.28787	2.03723	2.017	2.46745	2.21081	2.49555	2.32441	2.25954	2.50764	2.14223	2.23598	2.0302	2.09347	2.34471	2.29434
HCG11	3.22417	3.24286	3.29982	3.4109	2.69191	3.12462	4.76784	2.84697	2.90614	3.20048	3.24136	3.40947	2.96896	3.42193	4.06383	3.25336	3.03645	3.63286	4.21135	3.82027	4.72017	2.98804	3.23987	3.78569	3.11958	3.04477	3.33713	3.63577	5.54692	4.15717	3.52269	3.59903	3.39192	3.82248	2.94524	3.44804	3.58041	3.4916	2.65965	2.92484	3.49944	2.67209
NEK8	5.57683	5.12387	5.66145	6.33914	5.8397	5.36165	5.75855	5.4534	5.14202	5.75662	5.82185	4.89104	5.71489	6.42857	5.43246	5.81219	5.83229	5.50484	5.47741	5.36295	5.62401	5.56915	5.22782	5.57946	5.2083	6.03781	5.85207	5.38793	5.4232	5.97641	5.22724	5.66978	6.5026	6.33001	6.40799	5.77723	5.65067	5.9851	6.03291	5.44069	5.9832	5.64306
ARMH4	3.29744	2.89158	3.3185	3.15548	2.96959	3.01477	3.1352	3.3873	3.18614	3.16153	3.09548	2.87889	3.1361	3.02663	3.92871	3.05861	3.16369	2.93623	3.02224	3.43649	3.01929	3.14032	3.19371	3.20167	3.22219	3.31229	3.08727	3.15018	3.01627	3.20741	2.96688	3.17769	2.73937	3.00538	2.94298	2.84137	2.97946	3.07999	3.10817	2.97401	2.90088	3.39651
COX10-AS1	3.90002	4.12114	4.10452	4.0805	3.83328	3.81179	4.33735	4.17715	3.90841	3.49917	4.00722	3.88889	3.92155	3.67729	3.959	4.22506	4.03152	3.44451	3.47054	3.99581	3.89113	3.93495	4.11113	4.15101	3.53644	3.89805	3.63891	3.96784	3.59611	4.60444	3.9393	3.70117	4.9706	3.74881	4.63594	3.6946	3.58136	3.8389	4.14378	3.99485	3.96527	4.2447
LOC283177	5.13656	4.92715	5.41712	5.8851	5.03298	4.95549	5.16168	5.24434	4.39105	5.12618	4.6257	4.58972	5.99611	5.81468	5.32971	4.23158	4.85186	5.34672	5.28739	5.15516	5.2574	5.02693	5.69684	4.74043	5.24168	4.52499	4.51351	6.66261	4.10518	6.13538	5.66325	4.96591	6.02602	4.60059	5.27346	6.11528	5.39679	6.24934	5.52663	4.48186	5.15491	4.49073
PROSER2-AS1	2.42903	2.49106	2.58321	2.38686	2.77301	2.41485	2.56558	2.73229	2.53717	2.55411	2.83107	2.58093	2.79676	2.71538	2.58251	2.62911	2.59002	2.52235	2.55939	2.39253	2.56154	2.70215	2.81727	2.85154	2.39197	2.48397	2.49555	2.55135	2.56125	2.51217	2.55574	2.7297	2.52735	2.51292	2.53057	2.70397	2.5678	2.49377	2.30797	2.72003	2.74738	2.62922
FAM181A-AS1	2.64403	2.56948	2.71181	2.68458	2.73387	2.42629	2.75012	2.95617	2.67857	2.66874	2.63729	2.53433	2.75909	2.72454	2.69367	2.96358	2.63504	2.79323	2.80194	2.61139	2.63068	2.65386	2.88837	2.68287	2.37776	2.67162	2.79539	2.58447	2.6345	2.55929	2.59839	2.45713	2.62824	2.60898	2.9325	2.55992	2.94191	2.76606	2.6193	2.78813	2.69671	2.6524
LINC02382	2.46515	2.36486	2.59808	2.6414	2.81861	2.37547	2.28752	2.45082	2.71313	2.62692	2.53892	2.27104	2.85004	2.92548	2.27865	2.7677	2.60205	2.18662	2.31773	2.50088	2.38506	2.58114	2.69527	2.56456	2.32162	2.40546	2.42341	2.38321	2.53409	2.4425	2.38065	2.66729	2.69699	2.27333	2.55903	2.39546	2.35578	2.58423	2.52194	2.49016	2.50435	2.6204
LINC00648	2.28373	2.22851	2.24457	2.27952	2.46827	2.4712	2.3828	2.28224	2.46068	2.49014	2.12535	2.10239	2.45802	2.25107	1.92906	2.41747	2.67058	2.56529	2.17422	1.95959	2.11688	3.12653	2.55574	2.42657	2.14427	2.48887	2.17736	2.06135	2.14791	2.309	2.15441	2.53109	2.41279	2.1521	2.51125	2.43779	2.16141	2.27729	2.29063	2.24726	2.42729	2.02952
FANCB	2.80626	3.0338	3.20314	3.16285	2.5447	3.13538	2.62747	3.04191	3.32308	2.76565	2.97784	2.96893	2.86039	2.81909	3.40156	2.82467	2.94389	2.89089	2.89891	3.131	2.81967	2.88708	2.64729	3.20744	2.71872	2.47407	2.81778	4.00846	3.17985	2.88268	2.89257	2.53475	2.9433	2.65563	2.72801	3.27873	2.40323	3.23797	2.64138	2.7714	2.87587	2.8988
LINC02475	2.74037	2.57966	3.09406	3.27955	3.025	2.6026	2.42875	2.71512	2.62515	2.60661	2.95057	2.7142	2.70625	2.48647	3.12139	3.32773	2.83938	2.52862	2.75693	2.73381	2.8216	2.6187	2.8116	2.99655	2.58053	2.764	2.74346	2.68205	2.48026	2.56181	2.49696	2.95619	2.63721	2.67249	2.62809	2.85004	2.79392	2.50005	2.69874	2.67416	2.80207	3.04173
ASPG	4.13657	4.15198	4.04162	4.09885	4.64271	4.00051	4.25457	4.23772	4.24218	4.1234	4.43174	4.1847	4.41718	4.035	4.01649	4.22506	4.02892	4.32202	4.50172	4.03495	3.9338	4.51993	4.1739	4.30189	3.91162	4.05251	3.95768	3.98739	3.86918	4.02972	4.05805	4.12762	4.19377	4.14849	4.15517	4.04299	4.7396	4.11272	4.36116	4.17555	3.98687	3.7208
F11-AS1	2.5491	2.32681	2.42618	2.51912	2.64162	2.25462	2.44175	2.5428	2.44313	2.335	2.53787	2.53847	2.34615	2.34703	2.47006	2.33594	2.17734	2.42995	2.11643	2.35313	2.42341	2.26255	2.40075	2.49549	2.18284	2.12108	2.46462	2.33775	2.31298	2.35105	2.4909	2.2965	2.15454	2.30703	2.37404	2.22443	2.59117	2.39642	2.30261	2.32019	2.64329	2.37514
ZNF382	2.33784	2.28535	2.63838	2.06261	2.50646	2.288	2.13963	2.40286	2.37199	2.26846	2.2311	2.35039	2.35122	2.34412	2.19014	2.20107	2.25576	2.34813	2.48961	2.40674	2.33746	2.26368	2.15442	2.23777	2.49555	2.52994	2.52619	2.29533	2.23873	2.33529	2.44476	2.25987	2.35089	2.31462	2.44533	2.53555	2.19331	2.22181	2.34746	2.37679	2.30334	2.36229
LOC102724814	5.29677	5.0356	5.17253	5.32904	5.96012	4.83718	4.84692	5.44318	4.81057	5.3276	4.98447	4.71364	5.45064	5.31539	5.0049	5.29843	5.42763	5.0266	4.81439	4.99592	4.84432	5.35835	5.3901	5.37815	5.17697	5.71026	5.3657	4.99452	5.24001	5.25615	4.74197	5.03764	5.23483	5.08389	5.35341	5.3501	5.29266	5.20097	5.61426	5.0046	5.14559	5.10061
LINC01016	4.20409	4.50836	4.41457	4.57018	4.71896	3.99773	4.06048	4.32679	4.11821	4.35011	4.64322	3.93957	4.36306	4.63303	3.90143	4.41139	4.47361	4.22314	4.29044	4.2183	4.08893	4.61995	4.56252	4.40823	4.00872	4.55456	4.35933	4.3914	4.34361	4.21934	3.9034	4.44488	4.92367	4.37459	4.4446	4.55596	4.12916	4.14634	4.58835	4.05688	4.34843	4.07144
CT69	2.92436	3.20669	3.21099	3.22524	3.1748	3.12436	2.93659	3.05051	3.20088	2.99515	3.14087	2.90417	3.03962	3.17869	2.93224	3.28535	2.91246	2.85172	3.32235	2.79864	2.69414	2.98125	3.23299	3.02816	2.99108	3.11715	3.26531	2.94389	2.96399	3.18826	2.68712	3.13243	3.08185	3.02806	3.16601	3.32663	3.18194	3.28238	3.21383	3.01119	3.1086	3.07069
MIR570HG	4.58386	4.41299	4.31878	4.77518	4.31084	6.05138	5.06055	4.29774	5.02977	5.87323	6.04173	4.65536	5.51452	6.37521	3.92538	4.85453	4.52888	4.48835	5.24497	4.08841	5.59617	5.31394	4.63439	5.41168	5.49273	4.74435	5.40489	5.00205	5.44332	6.76794	5.17271	4.80367	6.36562	6.70031	6.21435	4.70806	5.18062	5.45932	5.36871	4.74655	5.13182	6.41352
ZNF585B	4.17562	3.82965	3.78883	3.88148	4.07586	3.69202	3.67718	3.25768	3.57425	4.26746	3.89469	3.97627	4.24845	3.94195	4.68723	3.56723	3.89825	3.94766	4.24961	4.32429	4.51212	3.71092	3.96817	3.42068	3.93481	4.18386	3.4951	4.11277	3.80493	3.74007	4.26434	4.31432	4.7631	3.30481	4.36962	3.7973	3.51357	4.3497	3.80937	4.35845	4.48707	3.98389
NT5C	5.04746	4.34585	4.8706	5.37565	5.17294	4.91195	4.47178	4.343	4.60125	5.43693	4.87904	4.9449	5.30328	5.4944	4.29431	5.06115	4.83648	4.93571	4.47092	4.88074	4.43693	4.62241	4.22057	4.62241	4.78947	4.72944	5.24126	4.85422	4.60929	4.82081	4.70377	4.7438	4.77283	4.97084	4.99089	4.8068	4.81851	4.80162	5.11472	5.11302	4.71393	5.0702
LINC01465	2.29656	2.37497	2.21877	2.26165	2.38919	2.11447	2.0399	2.36533	2.32439	2.01816	2.2749	1.94976	2.32627	2.21463	2.35413	2.24442	2.35275	2.08733	2.34376	2.1393	2.06854	2.26851	2.46982	2.29316	2.11403	2.28627	2.4584	2.18534	2.12729	2.16647	2.10637	2.2249	2.19905	2.04161	2.13697	2.18201	2.25701	2.17905	2.19717	2.15055	2.17344	2.00359
DPY19L2P3	2.24486	2.72144	2.50635	2.64413	2.15665	2.20131	2.30978	2.3298	2.56221	2.39479	2.32368	2.52561	2.10002	2.21747	2.15234	2.34436	2.38422	2.25045	2.37002	2.75487	2.36738	2.5002	2.34659	2.27127	2.11601	2.26419	2.64246	2.11591	2.15248	2.53082	2.29711	2.3223	2.58785	2.33405	2.61505	2.55747	2.22775	2.25278	2.47532	2.1142	2.04725	2.08099
CAPN14	1.98135	1.96724	2.16815	2.07698	2.2407	2.20666	2.4482	1.96458	2.05351	2.20123	2.5918	2.22351	2.20264	2.19592	2.09009	2.22517	2.29885	2.40373	2.3587	1.98157	1.98126	1.95235	2.17876	2.2638	2.12883	2.16883	2.19981	2.15127	2.13029	2.40534	2.03984	2.11649	1.86474	2.36049	2.30859	2.19062	2.06628	2.10432	2.34385	2.09733	2.41133	2.08514
LOC283665	2.15338	1.95705	2.16768	2.30159	2.47585	2.04131	1.81098	1.9573	2.13323	2.07929	2.24489	2.06385	2.37482	2.49174	2.17461	2.11232	2.06951	2.15493	2.09975	1.89977	1.77284	1.92762	2.2745	2.02364	2.07363	2.0968	2.09393	2.16868	1.94699	1.87659	1.98302	2.12754	2.23101	1.89783	1.96609	2.07129	2.08003	1.90836	2.17559	2.06508	2.32833	2.06587
CASC23	4.46131	4.39848	4.555	4.90401	5.08013	4.35088	4.12284	4.74232	4.4418	4.50663	4.60703	4.29756	4.59927	4.66405	4.35848	4.46874	4.66886	4.34132	4.41605	4.32298	4.26491	4.75698	4.77075	4.2359	4.05741	4.96967	4.39072	4.33734	4.19217	4.35207	4.09785	4.78501	4.7599	4.5943	4.63456	4.49618	4.49445	4.4634	4.58018	4.41571	4.45618	4.42147
MCM8-AS1	2.4193	2.51118	2.58544	2.42656	2.58416	2.35238	2.54728	2.68333	2.32795	2.45499	2.53809	2.2036	2.85415	2.43471	2.39539	2.3397	2.67097	2.00857	2.55574	2.23697	2.49194	2.10092	2.52908	2.56823	2.42276	2.66052	2.08159	2.7199	2.3469	2.4065	2.37404	2.45328	2.23398	2.28142	2.22594	2.18759	2.62901	2.33517	2.4056	2.29496	2.44328	2.61736
SUCLG2-AS1	3.42959	3.46834	3.35832	3.29814	3.63606	3.4303	3.30016	3.25512	3.62832	3.47806	3.72129	3.14442	3.23792	3.51758	3.37929	4.07017	3.69188	3.28595	3.78299	3.45837	3.42082	3.48255	3.74134	3.70439	3.28595	3.39415	3.51991	3.5463	3.28243	3.51275	3.42154	3.21075	3.75686	3.299	3.30009	3.74442	3.44934	3.30252	3.37383	3.21599	3.37929	3.43097
PIK3CD-AS2	2.2863	2.25113	2.28046	2.28268	2.31453	2.30537	2.13502	2.49011	2.35516	2.36202	2.51768	2.09195	2.28717	2.30218	2.24085	2.29509	2.28794	2.37574	2.52118	2.40508	2.21164	2.20215	2.17176	2.03027	2.33025	2.25165	2.33969	2.31603	2.34026	2.24538	2.12907	2.47631	2.23021	2.31014	2.32306	2.41627	2.71118	2.21366	2.34278	2.25906	2.26856	2.28935
MROCKI	2.67016	3.05164	2.46801	3.25904	3.11248	2.64806	2.44076	2.63798	3.12111	2.82428	3.13904	3.085	2.55241	2.49645	2.79954	2.67418	2.84461	2.55321	2.81903	2.97837	2.72563	3.04316	2.57815	2.76619	2.81674	2.85972	2.7329	2.87258	2.82898	3.0248	2.38389	2.91904	3.00155	2.44184	2.98563	2.91903	2.7381	2.97886	3.70757	2.43287	2.56789	2.52137
LINC00698	2.87064	3.297	3.10035	3.53505	3.23358	3.03749	3.24506	3.08983	3.17956	3.61376	3.11403	3.08313	3.18687	3.32072	2.96465	3.06062	3.2704	2.9512	3.10571	3.37544	3.2763	2.99345	2.96343	3.49303	2.96243	3.13028	3.16658	3.18796	3.10211	3.305	2.91711	3.21739	3.17489	3.00881	3.4225	3.22747	3.04952	2.98475	3.21246	2.97005	3.46223	2.99539
SPAAR	5.43584	5.53696	5.20141	5.4863	6.04166	5.55763	5.60739	5.97041	5.39776	5.57024	5.49784	5.41671	6.02092	5.47351	5.4255	5.67937	5.78042	5.51645	5.54521	5.48352	5.3497	5.92213	5.56356	5.53815	5.44621	6.13882	5.67394	5.61085	5.45781	5.54119	5.3024	5.79687	5.90596	5.41617	5.67343	5.81414	5.5618	5.67497	6.1633	5.38429	5.70889	5.56118
LINC01141	2.65477	2.75686	2.83424	2.60784	2.57121	2.44701	2.59101	2.70323	2.41029	2.55411	2.76005	2.40581	2.61902	2.54588	2.39539	2.70014	2.51487	2.27361	2.38953	2.4379	2.42341	2.66902	2.84188	2.37466	2.65572	2.94524	2.66559	2.68698	2.49311	2.63205	2.42944	2.46766	2.73291	2.76134	3.08678	3.28253	2.64351	2.67664	2.96326	2.57229	2.60211	2.69755
AGAP11	3.66554	4.08095	4.18952	4.19907	3.92003	3.93409	3.52507	3.81782	3.6604	3.75781	4.2266	3.92441	4.24241	3.69137	3.87872	3.94051	4.03599	3.90196	3.58691	3.99585	3.85342	3.7186	3.90424	3.70366	4.33949	4.03797	4.16785	3.92118	3.86179	3.79463	3.61388	3.64125	3.99178	4.06074	3.72197	4.1792	4.14119	3.96626	4.17785	3.76384	3.87365	4.29917
LCT-AS1	2.80621	2.50958	2.82862	2.56067	2.70215	2.58166	2.67249	2.93402	2.82243	2.58738	2.60766	2.63562	2.82448	2.73414	2.49896	2.69718	2.79749	2.7267	2.63753	2.63712	2.98576	2.57856	2.70386	2.74634	2.33881	2.65959	2.5691	2.6345	2.66943	2.97237	2.77502	2.60105	2.8851	2.44405	2.51116	2.69018	2.83023	2.53979	2.65102	2.71713	2.98076	2.38848
SH3PXD2A-AS1	3.65148	4.02792	3.49796	3.57198	3.98936	4.99852	3.58785	3.91435	3.2635	4.03406	3.90142	2.95374	4.4383	3.65148	4.112	3.59156	5.33587	3.28142	3.10071	4.23368	3.57537	3.83566	4.33716	4.80279	4.00292	3.44023	6.67417	4.09658	5.70836	3.84033	3.76333	4.57856	4.62058	4.32818	4.07966	3.272	4.48845	4.57139	3.95771	3.16371	4.92192	3.68232
LOC100130111	2.65177	2.83076	2.9342	3.14174	2.89279	2.44743	2.68329	2.77612	3.06994	2.79743	2.9857	3.0884	2.80545	3.00336	2.85073	2.97646	2.93001	2.73254	3.04372	2.9564	2.89054	2.79985	2.87967	3.04322	2.50161	3.37868	2.91491	2.97069	2.95586	2.7666	2.73067	2.88965	2.85327	2.63626	2.89719	3.09931	2.8714	2.82388	2.9859	3.07466	2.75113	2.78828
LOC100506606	3.15507	3.15156	3.02384	3.28679	3.11962	3.03396	3.084	3.23595	2.93368	2.98833	3.49259	3.23639	3.16496	3.61014	3.11898	3.22935	3.54247	3.22564	3.20281	3.19248	3.01348	3.38606	4.15599	3.60856	3.86919	3.46246	3.13266	3.21108	3.24002	3.23446	3.31364	3.21125	3.26076	3.02378	2.87082	4.13487	2.95083	3.35395	3.4303	3.14228	3.20156	3.31216
SLC25A43	7.42925	7.66093	7.74871	5.63165	6.19818	7.31156	6.41318	6.5348	7.51047	5.8138	7.73376	6.89547	6.39452	5.97111	6.87804	6.96643	7.41947	6.43301	7.21902	7.33073	7.62709	6.96595	6.69251	7.20569	7.26455	5.94342	6.73281	7.23566	6.46681	6.72338	7.18297	7.52952	6.99285	7.91206	6.16009	7.17644	6.90771	6.7213	5.15841	6.23044	7.29592	5.87441
LETM2	2.95886	3.40359	2.89843	3.35583	3.0338	2.98726	2.74371	3.28073	3.02606	3.03315	3.09024	3.02342	2.95387	3.09859	3.2207	3.34464	3.09761	2.87717	2.7424	3.06038	2.85472	3.10077	3.31441	2.82872	2.9643	3.01095	3.06311	3.00633	3.09298	2.91631	3.22205	2.97989	3.13012	3.27658	3.50687	3.31044	2.98726	2.97902	3.07028	3.06406	3.35183	2.96939
LINC02059	1.96008	2.13847	2.14682	2.25044	2.20478	1.90611	2.09154	2.0819	2.13356	1.95374	2.21116	1.94264	2.16025	1.96189	1.94632	2.07785	2.41956	2.0926	1.8589	1.95031	2.15093	2.0353	1.89764	2.09693	2.08715	2.51758	2.08628	2.06972	1.90698	1.99273	1.85153	2.05045	2.34999	1.95036	1.89584	1.9174	1.90754	2.13563	2.09908	2.10144	2.0921	1.95093
SMIM17	2.16697	2.34262	2.19824	2.37144	2.23047	2.21671	2.19088	2.29709	2.31609	2.18168	1.95428	2.14224	2.25138	2.14923	2.31629	2.13138	2.08768	2.17898	2.18972	2.16166	2.22528	2.04368	2.19244	1.82853	1.90558	2.19799	2.19932	1.97458	1.92906	2.22775	2.55574	2.28381	2.51642	2.25528	2.26194	2.27532	2.20444	2.50736	1.90988	2.00631	2.30832	2.17898
XKR6	3.51854	3.95724	3.49796	3.7999	3.68891	3.95579	3.50994	3.61594	3.60421	3.63796	3.76898	3.38117	3.52366	3.52811	4.06027	3.87246	3.70771	3.20493	3.51209	3.87161	3.61824	3.76612	3.7721	3.72396	3.57414	3.81457	3.51573	3.59415	3.65061	3.70154	3.42624	3.64149	4.12843	3.53289	3.59883	3.7558	3.71276	3.6071	3.57678	3.37035	3.63186	3.69312
ARHGEF7-AS2	2.18446	2.06823	2.09652	2.25508	2.22442	2.17797	2.26719	2.09535	1.94976	2.19309	2.07366	2.07767	2.28574	2.13026	2.20446	2.3186	2.26865	1.89889	2.24248	2.14812	2.36738	2.12753	2.23893	2.00051	1.98541	2.2984	1.93312	2.16392	2.11423	2.11423	2.25644	2.16819	2.05451	2.35372	2.13974	2.26973	2.18072	2.22531	2.12432	2.09032	2.39228	2.42575
LINC02148	2.1696	2.31248	2.12182	2.14662	2.57368	2.00351	2.23516	2.3178	2.26119	2.24681	2.25506	1.93233	2.11259	2.24403	2.1538	2.37234	2.26	2.10451	2.35554	2.10527	2.31636	2.0516	2.54206	2.06423	1.889	2.37435	1.94859	2.06736	1.94903	2.12318	2.06436	1.99385	2.32022	2.13677	2.09488	2.20105	2.43227	2.20298	2.16829	2.19227	2.22268	2.1205
TREML3P	2.47942	2.65427	2.47288	2.62199	2.6423	2.41488	2.55559	2.5992	2.5579	2.46336	3.02649	2.48594	2.67459	2.29462	2.46056	2.62923	2.69386	2.45955	2.5917	2.63664	2.31501	2.59456	2.85284	2.53786	2.55658	2.6794	2.42341	2.47873	2.31955	2.45804	2.69386	2.45476	2.88375	2.64663	2.35424	2.31221	2.72419	2.42555	2.74779	2.33352	2.6322	2.68371
WHAMMP2	4.78501	5.07268	4.80497	5.45186	5.23042	4.75406	4.78624	5.235	4.75449	5.17385	5.33101	4.76626	5.59211	5.24036	4.78674	5.26233	5.23309	5.14141	5.04267	5.05961	4.85714	5.17282	5.40884	5.115	5.08318	5.4201	5.09668	5.04336	4.94082	5.18738	4.69223	5.14398	5.29159	5.03329	5.36448	5.206	5.09632	5.27435	5.38143	5.10382	5.30305	4.96671
DGCR10	2.86834	2.80124	2.84008	2.9132	3.05032	2.60839	2.80314	2.97716	2.66806	2.83525	2.98533	2.89522	2.91367	3.04065	2.66527	2.94453	2.93196	2.79436	2.67992	2.84539	3.0524	2.97632	3.49295	2.76248	2.91496	2.75272	2.74682	3.05364	3.05067	2.79487	3.0511	3.1376	2.70123	2.62601	2.61888	2.87077	2.9378	2.674	3.11594	2.6736	2.87095	2.91733
SHB	6.66299	7.74921	6.84465	6.07777	6.407	6.71686	7.5511	6.55891	7.18574	7.36201	5.93113	6.11714	7.37702	7.1842	7.5336	6.84991	6.70965	6.72248	7.50179	6.74722	7.34608	6.77073	6.81786	6.83254	7.21302	6.19861	7.31107	7.45346	6.9954	6.80846	7.46142	7.23804	7.36698	6.87422	6.80245	7.00618	7.11441	6.7185	8.24679	6.80444	7.26499	6.57307
TMEM272	2.66216	2.48471	2.75179	2.60127	2.91266	2.54555	2.43963	2.68135	2.91026	2.79006	2.75847	2.50541	2.66174	2.54815	2.74037	2.70717	2.4617	2.20938	2.65741	2.45699	2.66052	2.8045	2.89676	2.53526	2.67951	2.4116	2.75732	2.49444	2.54839	3.09471	2.33343	2.64672	2.37212	2.58699	2.51049	3.02359	2.53039	2.48313	2.47923	2.42589	2.73	2.81161
FLJ31104	2.64949	2.80295	2.75969	2.88981	2.53878	2.6487	2.49642	2.5357	2.59805	3.01415	3.00847	2.6509	2.9107	2.68456	2.50049	2.53395	2.89815	2.54209	2.73065	2.9564	2.74967	2.67357	2.69527	2.49088	2.61327	2.90378	2.83779	2.67185	2.58119	2.69718	2.59578	2.62046	2.9393	2.51125	2.95355	2.7648	2.82804	2.75871	2.66689	2.4726	2.61026	2.6739
MFSD4A-AS1	2.99736	3.23183	2.96957	3.3245	3.0206	2.8246	2.98215	2.94841	2.80173	3.0315	3.18386	3.33078	2.79806	3.31606	2.9859	3.10144	3.33332	3.14819	2.83286	3.08624	2.87832	3.07075	3.22087	3.124	2.6103	3.09712	3.29924	3.0422	3.03188	2.93308	2.81283	3.05327	3.13028	2.79251	2.76069	2.87827	2.74507	3.31528	3.10716	2.87974	3.03528	2.7972
LINC00507	2.1352	2.00533	1.97252	2.06337	2.05107	2.02041	2.07282	1.89225	2.25916	2.28559	1.93804	2.0534	2.0731	2.00868	2.06068	2.04045	2.03831	2.07532	1.97977	2.00195	2.02523	2.17923	2.00723	1.98651	2.06479	2.17408	2.01045	2.00101	2.03723	2.11492	2.02415	2.10158	2.07429	2.1116	2.17234	2.01076	2.11944	2.14575	2.05633	2.08069	2.01423	2.04843
PFN4	2.9403	3.12862	2.90398	2.92349	3.34573	2.83917	2.90924	3.15613	3.14758	2.9584	2.92146	2.7822	3.28802	2.96151	2.71204	3.12655	2.66988	3.09172	2.89508	2.797	2.66196	3.01184	2.87681	2.97209	2.75055	3.14698	3.21895	2.71105	2.75569	2.82905	2.69126	2.97252	2.77853	2.82149	2.99646	3.04402	3.35767	2.98173	2.92801	2.64787	2.85004	2.82375
LOC101928718	3.26916	3.52105	3.46143	3.93068	3.79501	3.46787	3.34591	3.45219	3.75113	3.3096	3.46787	3.44963	3.9677	3.91216	3.39681	3.6986	3.9872	3.37444	3.40947	3.54405	3.37521	3.81681	3.86763	3.38239	3.3763	3.84946	3.56862	3.55775	3.67744	3.53781	3.43085	3.39501	3.4715	3.45669	3.30284	3.66762	3.57133	3.92777	4.19788	3.33429	3.97342	3.38792
PPP1R27	5.26529	5.13117	5.20311	5.5253	5.81943	4.90289	5.07974	5.36266	5.36944	5.56696	5.95066	5.22848	5.13119	5.02803	5.26544	5.31092	5.65808	5.28351	5.46862	5.19221	5.02456	5.62147	5.5058	5.24638	5.08695	5.25244	5.20596	5.30171	5.09917	5.35045	5.19727	5.14414	5.5485	5.14275	5.59454	4.93063	5.31189	5.38812	5.47815	5.0414	5.21796	5.12383
LINC00320	2.19304	2.11055	2.1009	2.33308	2.41315	2.15409	2.09841	2.28363	2.27841	2.24156	2.23236	2.06333	2.10104	2.09124	2.2376	2.33159	2.30011	2.23687	2.38953	2.40381	2.18299	2.16923	2.2205	2.08688	2.03206	2.34246	1.85889	2.14445	2.0239	2.03391	2.03337	2.19446	2.17663	1.95845	2.26296	2.08243	2.07854	2.1518	2.07964	2.12942	2.30949	2.16138
LOC284788	3.14521	3.3255	3.10828	2.98108	3.32943	3.17992	2.99511	3.09238	3.32532	3.22006	3.47537	2.95999	3.23307	2.92204	3.02189	3.26354	3.3209	3.02824	3.01874	3.00314	2.80669	3.29955	3.13028	2.95789	2.94781	3.36521	3.14811	2.93153	3.01967	2.97638	2.87165	3.15635	3.61425	3.20707	2.87082	3.10286	3.40981	2.92686	3.20607	3.0273	3.72154	3.11743
ANKRD44-IT1	2.18485	2.12526	2.24163	2.25883	2.17938	2.03091	2.18485	2.24024	2.15118	2.29734	2.23671	2.09362	2.18485	2.11482	2.37464	2.1037	2.27653	2.08431	2.03272	2.05484	2.1346	2.24173	2.15119	2.14652	2.21804	2.49582	2.20947	2.29515	2.34367	2.13049	2.18212	2.22588	2.27759	2.18485	2.21	2.19727	2.25934	2.03434	2.22508	2.12145	2.19453	2.40695
CBX3P2	1.87111	2.01423	2.05723	2.07833	1.95987	1.86907	2.0632	2.08784	1.8991	1.94567	2.03265	2.009	1.92745	1.94854	2.15597	2.03925	1.9644	1.99163	2.0218	2.00543	1.87985	1.86277	1.96707	1.86265	1.92321	1.95576	2.06797	1.93086	1.90012	2.02169	2.03465	2.00062	2.15953	1.87183	2.14584	1.97125	1.80048	2.09003	2.03063	2.02027	1.84736	1.94972
LOC100240728	3.27673	2.9523	3.03953	3.10495	3.22889	2.96653	3.34298	3.14073	3.21389	3.31097	3.50536	3.16703	3.30403	3.31166	3.00462	3.21028	3.08697	3.18074	2.8289	3.07866	3.37781	3.15408	3.42682	3.22872	2.88058	2.94524	3.04608	3.10544	3.14319	3.14073	3.09474	2.99183	3.62824	3.17123	3.14495	2.91749	3.8001	2.99567	3.12398	2.92945	3.37234	3.16948
LINC01487	1.91973	2.1476	2.32037	2.18389	2.32925	2.11311	2.44239	2.52226	2.09037	2.1662	2.06584	2.24113	2.33075	2.23219	2.06603	2.29027	2.10997	2.27848	2.10885	2.08235	2.13233	2.17238	2.32602	2.20256	2.1556	2.26097	2.24913	2.02841	2.20531	2.12152	1.99157	2.11808	2.43982	2.02627	2.04432	1.99974	2.62809	2.17682	2.41517	2.03776	2.12642	2.0381
LINC02189	2.11914	2.10083	2.39786	2.08899	2.48816	2.10956	2.25162	2.18599	2.0768	2.19396	2.02959	2.16014	2.17364	2.09727	2.29406	2.25498	2.21427	2.04717	2.2908	2.15028	1.81611	2.35502	2.72285	2.07449	2.24194	2.61068	2.33247	2.3489	2.24067	2.13514	2.02726	2.3046	2.09714	2.20763	2.37404	2.23193	2.44145	2.08577	2.34833	2.18249	2.1605	1.90149
C10orf55	2.24713	2.26936	2.49172	2.14031	2.63681	2.11857	2.22885	2.43517	2.20208	2.27178	2.33005	2.1027	2.35193	2.39492	2.16241	2.29958	2.03877	2.52451	2.03368	2.27568	2.25464	2.14185	2.13409	2.25713	2.08584	2.11458	2.28152	2.5489	2.21445	2.25713	2.18253	2.22939	2.21747	2.24088	2.21683	2.03853	2.18145	2.1216	2.38567	2.23492	2.29039	2.136
LOC339862	2.08432	2.3067	2.22683	2.37522	2.39112	1.99182	2.18265	2.10817	2.27226	2.25764	1.95424	2.14753	2.08367	2.2281	2.37031	2.28074	2.18344	2.10263	2.27487	2.05138	2.14389	2.25841	2.22382	2.14111	2.024	2.1353	2.14629	2.09471	2.08837	1.9731	2.08367	1.98097	2.11936	2.16592	2.13024	2.12714	2.20228	2.14662	2.10121	2.1569	2.35501	2.10946
LOC100507403	3.32532	3.17082	3.37511	2.81165	3.31228	2.96915	3.33672	3.48568	3.24785	3.22392	3.2866	3.26235	3.2548	3.33348	3.2776	3.1735	3.54376	3.02996	3.20236	3.15745	3.04725	3.43843	3.29476	3.27706	3.22123	3.52105	3.18004	3.34602	3.23281	3.23303	3.15996	3.41919	3.44894	3.04763	3.05293	3.18804	3.32773	3.09324	3.01154	3.05469	3.26854	3.06368
LINC00906	2.79668	2.78699	2.94694	2.9577	2.95141	2.67533	2.97204	2.58834	2.98292	3.10929	3.10817	2.71105	2.94136	3.08804	2.80348	2.74194	3.00324	2.63755	2.81477	2.77896	2.69903	2.75735	3.00691	3.06835	3.07702	2.79268	2.82736	3.26303	2.73901	2.89307	2.7751	2.7745	3.13321	2.9113	2.96858	2.73408	2.95915	2.60119	3.12273	2.87974	2.88593	2.5959
MATN1-AS1	3.07802	2.99746	3.16625	3.166	2.72948	3.09492	2.50306	2.87703	2.50642	2.83182	3.18733	2.7989	2.78367	2.82964	3.04234	2.71117	2.94389	2.88185	3.27262	3.05143	2.94278	2.95086	3.11956	2.74056	2.96079	3.08372	3.30626	3.09051	2.84607	3.19275	2.64196	2.7407	3.21791	3.49317	2.95783	3.34096	2.95528	2.595	2.55574	2.97011	3.45919	2.90591
ALKBH3-AS1	2.41509	2.78917	2.75936	2.4909	2.77668	2.41113	2.79739	2.88767	2.60233	2.68094	2.9276	2.50486	2.8597	2.71273	2.45422	2.79773	2.75753	2.40805	2.8526	2.60282	2.57062	2.82936	2.74583	2.81484	2.30701	3.05065	2.75294	2.52382	2.52499	2.65009	2.59251	2.67352	2.64312	2.52891	2.71086	2.68637	2.65508	2.67685	2.91211	2.68836	2.95164	2.862
LOC100507634	2.80471	2.87974	2.75351	2.66341	2.93078	2.56982	2.49879	3.15416	2.84839	2.83043	2.51926	2.81594	2.60376	2.72201	2.82671	2.78204	2.83708	3.01225	2.95613	2.78907	2.7716	2.89236	2.85339	2.93078	2.67805	2.70967	2.81594	2.96474	2.83726	2.76277	2.60408	3.06874	2.80139	2.52019	2.91342	2.59043	2.5135	2.7936	2.93135	2.65041	2.96074	2.89259
LINC01305	2.23718	2.00116	2.15949	2.45517	2.1344	2.2279	2.12926	2.18823	2.05402	2.34543	2.08915	2.21969	2.51294	2.02849	2.00944	2.19114	2.15312	2.18222	2.35963	2.20746	2.0399	2.22446	2.35652	2.35323	2.23765	2.31121	2.08187	2.15312	2.30301	1.98701	2.05359	2.36457	2.19685	2.09481	2.25059	2.30926	2.23369	2.31357	2.37404	1.99585	2.15043	2.43493
STBD1	2.42431	2.42626	3.00707	2.58462	3.0862	2.54697	2.73481	2.68665	2.56506	2.80592	2.90089	2.56952	2.92889	2.5879	2.57714	2.62641	2.69398	2.46955	2.5176	2.49175	2.36318	2.45419	2.72498	2.51634	2.60447	2.5315	2.5543	2.87046	2.15226	2.57269	2.33184	2.67623	2.57242	2.6152	2.47066	2.72534	2.88169	2.53808	2.45385	2.49765	2.69712	2.90088
LERFS	4.42301	4.15259	4.4696	4.84078	4.66712	4.38612	4.23255	4.35146	4.19341	4.31197	4.8134	4.37416	4.46233	4.77689	4.29302	4.48275	4.5252	4.55091	4.42569	4.30811	4.32275	4.49237	4.41837	4.54728	4.22981	4.64599	4.13404	4.36873	4.18053	4.44731	4.50071	4.55431	4.67761	4.58039	4.56586	4.50075	4.54501	4.2024	4.70482	4.26107	4.99068	4.36151
LINC01310	3.90139	4.13319	3.96471	3.76317	4.36859	3.7497	3.79062	3.87821	4.01088	4.13821	3.7425	3.80449	3.89887	3.99054	3.86336	3.88624	4.07255	3.90288	3.87204	3.96872	3.79855	3.92697	3.63327	3.93468	3.56275	3.83853	3.74878	3.92039	3.81696	3.99563	3.67043	4.05344	3.84258	3.92128	3.76574	4.17387	4.14244	3.98396	3.97033	3.82625	4.0197	3.90539
PARD6G-AS1	3.60399	3.82438	3.69873	4.05492	4.18428	3.404	3.93159	3.97224	3.7503	3.72472	3.90535	3.72366	3.61233	3.5767	3.95258	4.05631	3.9296	3.60831	3.61025	3.82579	3.74228	4.0054	3.81828	3.57961	3.60397	3.90307	3.6412	3.59266	3.78242	3.78652	3.52753	3.74125	3.78082	3.71464	3.72295	3.89256	3.7647	3.78343	3.92027	3.63494	3.69536	3.61418
LOC283038	2.19434	2.24574	2.06889	2.43816	2.40115	1.95133	2.18371	2.3063	2.28219	2.27968	2.14816	2.09719	2.43347	2.11461	2.20663	2.48974	2.44045	2.31546	2.25158	2.14791	2.1481	2.16074	2.1294	2.19075	2.1115	2.22475	2.21003	2.19755	2.13998	2.08775	2.25175	2.37846	2.44867	2.11063	2.19989	2.53774	2.20228	2.44441	2.67733	2.09962	2.18753	2.22069
LINC00624	2.15361	1.96724	1.99598	1.94428	2.15021	1.92571	2.04533	1.94673	2.07564	2.18633	2.24506	2.18291	2.15137	1.98926	2.14869	2.1221	1.98247	2.09449	2.16395	2.10372	2.00518	2.06067	2.02888	1.94013	1.84626	2.0824	2.02702	2.06941	2.03766	1.98806	2.08628	2.12146	2.03721	1.94826	2.0071	2.19775	2.08134	2.22	2.0987	2.09032	2.13691	2.0628
LOC101927870	2.17076	2.13231	2.40494	2.37439	2.53002	2.17122	2.16014	2.28892	2.44755	2.24562	2.53252	2.14478	2.49289	2.56245	2.21631	2.54812	2.75356	2.20789	2.3696	2.36114	2.25165	2.31079	2.95663	2.31134	2.31232	2.23983	2.35983	2.08213	2.26214	2.14639	2.27792	2.42351	2.21747	2.38229	2.45043	2.31232	2.56991	2.28373	2.60735	2.18156	2.27087	2.28492
LINC00870	2.8921	2.87974	2.80529	2.88817	3.23852	2.66879	2.73716	2.98083	3.10177	3.132	3.04704	2.9728	3.14347	2.93291	2.89051	3.02832	3.13028	2.94606	2.93177	2.7247	3.10692	3.16868	3.38813	2.89403	2.7745	2.93315	2.92321	3.17853	2.82035	3.05809	3.0496	2.84969	2.70374	3.03374	2.98892	3.16651	2.76352	2.89627	3.18826	2.87617	3.09201	2.96104
LOC401312	4.57677	4.5242	4.3703	4.92549	4.99103	4.42572	4.37553	4.66717	4.455	4.81723	4.72365	4.39129	4.79296	4.76927	4.51708	4.68884	4.47492	4.4893	4.42394	4.501	4.35932	4.61168	4.78941	4.64684	4.24499	4.70686	4.52656	4.33806	4.41829	4.24505	4.29353	4.63048	4.6554	4.64734	4.88128	4.77362	4.53048	4.61448	4.94247	4.37592	4.80294	4.45026
LOC101928002	2.68096	2.39361	2.72242	2.44258	2.82247	2.55014	2.65497	2.53679	2.58477	2.64947	2.80252	2.44674	2.50401	2.48512	2.3286	2.32184	2.30179	2.48102	2.28874	2.59955	2.34479	2.31353	2.85173	2.52485	2.36205	2.46159	2.5886	2.51081	2.29925	2.51825	2.26699	2.45345	2.49014	2.47105	2.25018	2.34471	2.49819	2.34168	2.52927	2.21182	2.35501	2.73237
PICART1	2.87056	2.70116	3.24229	3.00198	3.06715	2.83732	2.72268	2.95304	2.91115	2.9779	3.57578	2.94475	3.08299	2.82633	2.94993	3.23021	3.02978	2.82527	3.07487	3.07288	2.86753	2.97913	3.09682	2.80819	2.92095	3.1624	3.04186	3.23886	2.75675	3.00774	2.92903	3.26228	2.72652	2.97913	3.38712	3.14987	3.15524	3.16699	2.67023	3.12557	2.80977	2.86866
PITRM1-AS1	2.97153	2.98487	2.88806	2.87053	3.19616	2.80806	2.82626	2.78184	2.84806	2.88335	2.88641	2.78046	3.09818	2.91313	2.69766	3.13443	3.20773	2.84053	3.09993	3.00118	2.85841	2.9725	2.9477	2.74138	2.77008	2.71318	3.0583	2.71105	3.08265	3.02789	2.60543	2.97556	3.07087	2.92138	3.03219	2.67537	2.80718	2.66918	2.9591	2.60633	3.03528	2.98093
KIF9-AS1	4.46791	4.33395	4.40969	4.4806	4.70543	4.09129	4.21906	4.3086	4.46067	4.46057	4.39413	4.3383	4.47258	4.35627	4.66922	4.59031	4.18603	4.33004	4.28584	4.47892	4.66877	4.62085	4.60841	4.42458	4.14351	4.27576	4.60167	4.38469	4.19361	4.45629	4.26454	4.34791	4.48574	4.50698	4.26952	4.36296	4.41318	4.13668	4.48486	4.26704	4.73304	4.3335
DCTN1-AS1	2.09562	1.86797	2.01187	2.2384	2.12394	1.95719	2.25121	2.22263	1.93298	2.0901	1.87024	1.94954	2.01067	1.92138	1.89618	2.23844	2.32084	2.09172	2.00116	2.1142	1.94822	2.02527	2.21155	1.99592	1.89716	2.14939	1.84882	2.02605	2.03753	1.87659	2.03753	2.05857	2.21098	1.87753	1.96017	1.84696	1.99095	2.04176	2.05224	2.04556	2.33586	1.96886
LINC01622	2.79979	2.73384	2.63035	2.95284	3.16585	2.45917	2.87131	2.83902	2.54354	2.85467	3.01506	2.78341	2.97514	3.11733	2.58828	2.99269	3.24609	2.77888	2.76046	2.78374	2.61499	2.80614	3.00553	2.73523	2.64319	2.56856	2.65438	2.65908	2.75408	2.74962	2.74962	2.61401	2.63134	2.76034	2.98866	2.77614	2.95783	2.66552	2.64192	2.74341	2.81416	2.709
CCDC38	2.65193	2.49923	2.47374	2.49367	2.7197	2.39074	2.46991	2.55253	2.64266	2.51476	2.83096	2.2557	2.53154	2.83893	2.41667	2.79337	2.66575	2.51773	2.57043	2.60677	2.71429	2.46774	2.93475	2.61647	2.33504	2.56817	2.63951	2.36366	2.45453	2.74665	2.51082	2.57818	2.53638	2.60456	2.36673	2.27157	3.07568	2.54819	2.43077	2.71945	2.53775	2.6199
LINC02436	2.02031	2.07698	2.24602	2.02746	2.39796	1.93675	1.97596	2.12519	2.28891	2.06733	2.06504	1.93448	2.10742	2.12607	1.92691	2.41464	2.05915	2.35025	1.93214	1.95101	2.03964	2.29558	2.21189	2.09518	1.82623	2.17408	1.97612	1.89249	1.83593	2.01799	1.89736	2.01812	1.93045	1.9783	2.08906	2.05958	1.84943	2.1074	2.08426	2.01406	1.90203	2.08127
POM121L8P	2.54811	2.54591	2.53098	2.83779	2.78699	2.33405	2.56084	2.61876	2.82113	2.53152	2.52072	2.34809	2.64044	2.718	2.42258	2.4963	2.4727	2.46966	2.59413	2.31659	2.14389	2.6894	2.55533	2.52031	2.23099	2.74745	2.46175	2.4434	2.43688	2.64888	2.4909	2.81212	2.54543	2.80086	2.46175	2.63487	2.46342	2.85471	2.66046	2.74831	2.61359	2.55265
C7orf57	1.86665	1.84942	1.91913	1.92871	1.71501	1.98757	1.98839	1.92335	1.95512	1.86417	2.02959	1.83925	1.93314	1.72593	1.98839	1.8201	2.06422	1.87048	2.00023	2.00237	1.94003	1.90519	1.90287	1.90353	1.82943	1.86082	2.04962	1.90975	1.79284	1.91865	2.24806	1.95643	1.94772	1.82576	1.98309	1.97132	1.82255	1.93572	1.72352	1.80293	1.93289	1.88772
RUNDC3A-AS1	1.87957	2.18945	2.06517	2.41707	2.43688	1.97658	2.00554	1.93329	2.21903	2.14508	1.89862	2.07577	2.11478	2.14683	1.96096	2.1672	1.94263	2.11937	2.13833	1.81453	2.04519	2.0345	1.96977	2.03636	2.14234	2.31524	2.00566	1.94405	1.96574	2.17814	1.96183	2.17268	2.32601	2.00149	2.06512	2.06134	2.13747	2.09952	2.10038	2.17814	2.03798	2.28724
VWA8-AS1	2.14003	2.0133	2.25439	2.39108	2.0152	1.98713	1.91163	2.26114	2.19047	2.20203	2.25463	2.09567	2.03131	2.22651	2.41918	2.19114	2.0229	2.00727	2.23594	1.99204	2.11663	1.96775	2.10051	2.01547	2.15059	2.22681	1.96724	2.22807	1.98455	1.98302	1.78013	2.10461	2.08906	2.03304	2.0922	2.20596	2.04727	2.01094	2.27384	2.18942	2.14944	2.05808
CCDC13-AS1	2.8035	2.7364	3.01901	2.9265	3.02288	2.78325	2.83797	2.94368	3.1128	2.83874	2.94011	2.71105	3.01155	2.92402	3.00626	3.38422	3.11401	2.74779	2.92284	2.61013	3.02288	2.92843	3.19779	2.78222	2.82736	2.92897	2.84517	2.74771	2.99957	2.89307	2.71927	2.69527	3.08946	3.02363	2.81433	3.39499	3.25147	2.85313	2.84045	2.97176	2.5509	3.05406
LINC00642	5.84433	5.6683	5.75416	5.72908	6.45193	5.41685	5.6332	5.6466	5.68712	5.82508	6.01525	5.49673	6.18704	6.07632	5.49877	5.89284	5.97625	5.78734	5.75656	5.66461	5.58829	5.59496	6.10153	5.75957	5.34429	6.14026	5.38035	5.69814	5.6537	5.71554	5.23231	5.81244	5.7975	5.49683	5.8423	5.80571	5.90659	5.66461	6.22098	5.3988	5.89271	5.91465
FAM170B-AS1	3.55173	3.66376	3.71007	3.75755	3.95988	3.65803	3.83218	3.89514	3.7815	3.74286	4.14656	3.75547	4.01171	3.70405	3.60589	3.73444	3.90364	3.82716	3.73381	3.71395	3.50698	3.71092	3.89845	3.69905	3.6226	3.73721	3.62029	3.66369	3.51871	3.63376	3.38794	3.69715	4.03031	3.62281	4.00593	3.7782	3.75704	3.71197	3.8616	3.6246	3.7583	3.67599
LOC101929114	2.90408	2.71837	2.47655	3.01013	2.72705	2.62704	2.8315	3.17501	3.38111	2.78462	2.90026	2.83689	2.88949	2.8667	2.77	3.12235	2.79777	2.65488	2.71269	2.85174	2.7323	2.89421	3.1914	2.87342	2.62539	2.56017	2.98466	2.71981	2.7922	2.89791	2.65231	2.84145	2.71331	2.7794	2.78146	3.12369	3.04917	3.18813	2.92838	2.72753	2.99633	2.86327
RSU1P2	2.34795	2.16284	2.23537	2.40851	2.886	2.29129	2.25932	2.41993	2.28342	2.17862	2.28991	2.11745	2.32565	2.31896	2.18141	2.80047	2.50811	2.37273	2.15306	2.35313	2.17752	2.29758	2.29839	2.5646	2.24618	2.42995	2.31436	2.32841	2.15368	2.28977	2.20342	2.28989	2.53952	2.36546	2.59866	2.6224	2.31772	2.17389	2.59443	2.10461	2.44752	2.31883
TRIML1	3.03336	2.84653	2.98519	3.20345	3.1507	2.748	2.84117	3.02171	3.15849	3.07373	2.9363	2.77589	2.98443	3.06725	2.95641	3.14634	3.12284	2.881	3.01147	3.16545	3.00828	3.04744	3.09371	3.18236	3.04748	3.22562	2.94266	2.83385	3.21232	2.97658	3.03271	2.88286	2.86269	3.04606	3.05293	2.97511	3.30515	2.85742	3.20607	2.69022	3.29239	2.90133
SAMD15	3.95373	3.94677	4.11096	4.02785	4.9499	3.75996	3.45444	3.9717	3.75304	4.28902	3.86852	3.73105	4.1941	3.72328	3.93613	4.14279	4.06216	3.91017	3.87403	3.9595	3.96413	4.27091	4.17977	4.30837	3.81272	4.49357	4.12098	3.89582	3.68689	4.07385	3.97541	4.15317	4.73851	4.09188	4.13187	4.21819	3.97641	3.99186	3.93178	4.01871	4.13352	3.70916
LINC01142	3.33062	2.95802	2.90284	3.48221	3.45023	3.10327	2.81908	3.13811	2.80353	3.24527	3.05559	2.88225	2.9157	3.12274	2.93452	3.36815	3.02929	2.96366	2.42123	3.07298	2.81286	3.10731	3.05293	2.90409	2.80487	3.21676	3.27844	2.68534	2.91321	3.11142	2.71091	3.03781	3.07653	3.19258	3.07792	3.32938	2.78907	3.02887	3.3251	3.01587	3.44977	3.01523
ZNF286A	4.3769	4.70564	4.32937	4.91904	4.31056	4.46913	4.63374	4.57542	3.84458	4.56079	3.8982	4.52216	4.17712	4.315	4.38549	4.45984	3.84393	4.12645	3.90682	4.45753	4.53084	4.34997	3.65639	3.92867	4.09286	3.54462	4.10958	4.09658	4.11668	4.40413	4.07591	5.23426	4.71889	4.4846	5.16697	4.40297	4.33299	4.21916	3.95641	5.3137	3.95241	5.02546
ASAP1-IT2	3.01908	2.87418	3.1932	4.33225	3.03513	2.95861	3.00042	2.77107	2.72293	3.08424	3.01403	2.53186	3.34875	3.81223	3.0368	2.86135	2.8371	2.98023	2.87222	2.71589	2.75194	2.83264	2.84818	2.89997	3.43747	3.20554	2.69672	3.17855	3.21314	3.23392	2.93186	3.14146	2.96287	3.30718	3.72683	3.33042	3.40036	3.27314	3.29155	2.84951	3.17685	3.03172
SMC5-AS1	3.35056	3.44963	3.56839	3.3046	3.78377	3.28465	3.26022	3.44963	3.26594	3.13512	3.23702	3.08011	3.29977	3.4946	3.20582	3.27947	3.29062	3.11345	3.61171	3.3646	3.2175	3.28567	3.3366	3.33691	3.07165	3.14521	3.60034	3.45729	3.07309	3.21114	3.03744	3.48746	3.36674	3.2276	3.1011	3.04806	3.80044	3.09386	3.46433	3.37903	3.2442	3.17109
LOC101927604	3.08286	3.22437	3.2643	3.12472	3.45554	2.87401	2.92101	3.12141	2.986	3.28145	3.2976	2.80132	3.60098	3.11063	2.53226	3.20137	3.12136	3.24332	3.12268	3.0285	2.97722	3.12413	3.57301	3.08136	2.77803	3.01598	2.80625	2.96218	2.92865	3.08772	3.00712	3.0999	3.41346	3.09104	3.14448	3.21516	3.21449	3.25516	3.14431	3.01643	3.32111	3.02619
LINC00550	2.05485	2.02326	1.84911	1.93866	2.12529	1.86989	1.83885	1.95293	2.08257	1.89883	1.88542	1.93687	1.91714	1.94577	1.83616	2.05839	1.97759	1.74287	1.9255	1.85819	1.94488	1.97857	1.979	1.91365	1.81862	2.25943	2.04718	2.15119	1.87659	1.97729	1.94211	1.95689	2.27055	1.89537	1.83897	2.09346	2.06641	2.03884	2.28461	1.91974	2.0399	1.89379
LINC02092	3.43885	3.42451	3.19158	3.77875	3.53505	3.30811	3.64873	3.38773	3.36414	3.67246	3.38305	3.10949	3.36087	3.31476	3.23626	3.31075	3.38738	3.27437	3.22189	3.42862	3.29344	3.12974	3.71251	3.42004	3.2857	3.47847	3.42161	2.90785	3.50404	3.40726	3.32663	3.08934	3.61203	3.45819	3.46044	3.66653	3.40777	2.96277	3.55723	3.257	3.36687	3.4266
CHRM3-AS2	2.6773	2.63773	2.86683	2.48905	2.65658	2.48162	2.51012	2.66552	2.44215	2.64932	2.38953	2.40554	2.7293	2.48617	2.48397	2.40544	2.45928	2.48671	2.52884	2.45102	2.54285	2.30059	2.3636	2.28828	2.4973	2.55691	2.47135	2.43324	2.5002	2.33994	2.3025	2.67182	2.70311	2.57973	2.45143	2.20638	2.34466	2.37404	2.76549	2.49637	2.49475	2.32852
LOC100130548	2.34624	2.27618	2.36619	2.2284	2.20981	2.11311	2.55448	2.39968	2.59296	2.4585	2.66413	2.3511	2.36889	2.52915	2.30136	2.53594	2.53037	2.14763	2.41809	2.3849	2.24916	2.65475	2.57636	2.45966	2.24847	2.40308	2.29934	2.25944	2.3776	2.23918	2.29531	2.44989	2.33194	2.34452	2.22216	2.23652	2.09248	2.24223	2.46008	2.24174	2.27204	2.29383
LOC105372547	2.26837	2.31449	2.09072	2.16549	2.30314	2.14172	2.10358	2.38181	2.22308	2.11337	2.32703	2.29169	2.49654	2.21631	2.11115	2.23874	2.5356	2.15234	2.27682	2.39101	2.34036	2.26045	2.3963	2.20547	2.09345	2.45333	2.44128	2.16633	2.03723	1.8492	2.20653	2.18712	2.33388	2.21878	2.20982	2.21103	2.08202	2.27177	2.51567	2.15315	2.47705	2.13894
UST-AS1	2.06013	2.03523	2.18905	2.00162	2.34485	1.97484	2.20335	2.1551	2.13689	2.25362	2.26103	2.13834	2.14937	2.07076	2.10717	2.48412	2.14541	2.1862	2.23423	2.45699	2.09967	1.81627	2.11839	2.25576	2.06494	2.05816	2.14791	2.13834	1.82929	1.98302	2.20104	1.95167	2.09309	2.02153	2.13737	2.3167	2.16141	2.27594	2.0701	1.94182	2.15636	1.98165
LINC02466	2.56067	2.2692	2.2724	2.21329	2.82978	2.32831	2.27876	2.32037	2.6423	2.31773	2.53321	2.90973	2.35378	2.19152	2.5272	2.19114	2.21567	2.37863	2.36654	2.27405	2.43374	2.34395	2.28574	2.28004	2.31632	2.38797	2.28422	2.15444	2.26252	2.41091	2.39208	2.38368	2.57122	2.51938	2.22537	2.31993	2.27801	2.38607	2.37404	2.29471	2.20648	2.25682
LRRC52-AS1	3.46765	3.78026	3.94367	3.83102	3.84575	3.63592	3.6829	3.55513	3.39898	3.83916	3.90774	3.78367	3.6538	3.89174	3.66728	3.77153	3.72416	3.48825	3.47675	3.91633	3.38494	3.5656	4.26408	3.91096	3.35182	3.93591	3.55308	3.65846	3.36576	3.48498	3.41754	3.75728	3.85922	3.5331	3.50334	3.69042	3.72621	3.69311	3.96887	3.68893	4.24432	3.42754
LOC105377458	1.88481	2.00025	1.91432	1.96636	1.95	1.9561	2.0022	1.90159	2.0773	2.00652	1.85223	1.98387	1.91997	1.98713	1.96413	2.19114	2.076	1.82021	1.96873	1.77308	1.94003	2.03929	2.05951	2.00617	2.01029	2.03631	1.8733	2.02033	1.93072	2.04996	2.016	1.84895	1.88622	1.921	1.90184	1.93496	1.91006	2.00753	2.10485	2.01226	2.0399	2.00525
PURPL	2.05591	1.96757	2.43721	2.02527	1.88665	1.90223	2.21878	1.78362	2.00661	1.96757	1.90972	1.9441	2.07189	1.86078	2.33405	2.06027	1.96455	1.9289	2.03433	1.83229	2.01556	1.95235	2.18983	2.02265	1.89319	1.84665	1.98895	1.89249	1.98813	1.82864	1.78435	1.83898	1.91934	2.56373	2.09018	1.91613	1.95463	1.93618	1.89319	2.12007	1.9908	2.00392
NANOS2	2.8103	2.87974	2.5068	2.80293	3.46921	2.94294	2.93396	2.8851	2.93727	2.55411	2.81556	2.35502	2.80642	2.8828	2.73666	2.48498	2.74825	2.42564	3.08189	3.182	3.02433	2.57013	2.85179	2.91061	2.40793	2.84461	2.76463	3.00659	2.57653	2.7404	2.67539	2.9403	2.87349	2.86304	2.76711	2.88887	2.80548	2.63519	2.98667	2.56398	2.78153	2.82614
LOC101928760	2.73586	2.9287	3.14495	3.14866	3.12581	2.71263	3.08033	3.67997	3.12472	3.15358	3.15788	2.92915	2.89074	3.08546	2.95914	3.03413	2.81488	3.27389	3.07856	3.12986	2.60751	2.96059	3.1051	2.81023	2.71698	2.91021	3.08832	2.98191	2.75675	3.29245	2.62991	2.83223	3.15993	2.70608	2.95519	2.84778	2.9117	2.70572	3.09141	2.91724	3.15899	2.95981
IPO11	2.79377	2.45918	2.38865	3.0044	3.2469	2.8362	2.51433	2.85444	2.61554	2.55519	2.92328	2.44797	2.84743	2.65738	2.12931	2.51205	2.65574	2.43391	2.68822	2.46293	2.55043	2.59143	3.12727	2.54423	2.46886	2.88235	2.5213	2.54863	2.48047	2.47844	2.3053	2.55582	2.98448	2.55922	2.40792	2.61182	2.52118	2.64661	2.84136	2.42239	2.85528	2.70063
LOC105373958	3.55289	3.80767	4.11068	3.63635	4.61817	3.3744	3.83904	3.78911	3.99814	3.76511	3.80972	3.7058	3.61052	3.63606	3.91249	3.77655	3.72194	3.89126	3.94479	3.66252	3.70865	3.7832	3.94246	3.94611	3.74871	4.12212	3.89417	3.77104	3.74332	3.4915	3.70699	3.61081	4.06278	3.50646	3.59931	4.13309	3.90425	3.50753	3.74044	3.50984	3.95082	3.7421
ZPLD2P	2.56067	2.48999	2.87618	2.74068	2.70223	2.41105	2.46856	2.67487	2.26966	2.59738	2.70677	2.29187	2.41296	2.46724	2.64749	2.57393	2.48586	2.45282	2.44174	2.40753	2.30812	2.6806	2.60862	2.45206	2.07907	2.35779	2.32483	2.49088	2.34115	2.68665	2.82142	2.7745	2.85284	2.31505	2.5512	2.51967	2.73022	2.57457	2.45438	2.09032	2.71145	2.3727
PDE6B	3.56068	3.59755	3.65123	3.6258	4.0476	3.40135	3.7937	3.38176	3.58371	3.60795	4.05692	3.39255	3.67916	3.70405	3.57201	3.68489	3.52103	3.48547	3.74707	3.5101	3.46378	3.8233	4.08562	3.6325	3.35648	4.00059	3.76459	3.49291	3.61441	3.67905	3.44124	3.62211	3.63657	3.51678	3.74431	3.65842	3.64952	3.56999	4.16277	3.3733	3.54157	3.53691
LOC101927967	2.70557	3.02899	2.65578	2.61559	3.05584	3.83327	2.65986	2.48776	2.45628	2.99588	3.05637	2.55067	2.4164	3.12274	2.74445	2.71922	2.94867	2.51338	2.96814	2.26093	3.34425	2.708	2.55574	2.80249	2.35927	2.66169	2.72287	2.46102	2.17315	2.35419	2.80522	2.66924	2.41977	3.05637	3.27177	2.40367	3.22634	3.28964	3.09356	2.39577	2.8132	2.85309
LNCAROD	1.93861	2.44314	2.61366	2.20972	2.43255	2.33023	2.35215	2.18072	2.32018	2.18536	2.33566	2.2969	2.28574	2.2215	2.51313	2.69718	2.47894	2.15981	2.63985	2.24898	2.13958	2.30169	2.5464	2.43939	3.10433	2.70193	2.25267	2.457	2.15981	2.22112	2.45476	2.22677	2.56558	2.43281	1.95413	2.5055	2.34769	2.24562	2.23111	2.22369	2.47063	2.29613
[truncated: 19,008 more rows]
